# Supplementary material for: A comparative lipidomic study of the human placenta from women with or without gestational diabetes mellitus
Source: Royal Society of Chemistry journal article supplement (doi:10.1039/d2mo00083k), 2022-04-23
Supplement: d2mo00083k1.xlsx [file d2mo00083k1.xlsx]

## Sheet: Sheet1
Header	Description
id	The unique data number of the substance in this qualitative analysis
MS2 name	The substance name obtained by qualitative matching analysis of secondary mass spectrometry
MS2 score	The score of the second-level match is [0, 1], the larger the better
MS1 name	For the name of first-level fragment ion matching, refer to HMDB database
MS1 ppm	The accuracy of the first level match, the value is (-25, 25), as close to 0 as possible
mzmed	Material characteristics Mass charge ratio of ions
rtmed	Chromatographic retention time of the substance
id	MS2 name	MS2 score	MS1 name	MS1 ppm	mzmed	rtmed	GDM1_pos	GDM2_pos	GDM3_pos	GDM4_pos	GDM5_pos	GDM6_pos	GDM7_pos	GDM8_pos	GDM9_pos	GDM10_pos	GDM11_pos	GDM12_pos	GDM13_pos	GDM14_pos	GDM15_pos	GDM16_pos	GDM17_pos	GDM18_pos	GDM19_pos	GDM20_pos	Mean GDM	NC1_pos	NC2_pos	NC3_pos	NC4_pos	NC5_pos	NC6_pos	NC7_pos	NC8_pos	NC9_pos	NC10_pos	NC11_pos	NC12_pos	NC13_pos	NC14_pos	NC15_pos	NC16_pos	NC17_pos	NC18_pos	NC19_pos	NC20_pos	Mean NC	QC01_pos
2717	ACar(20:3)	1			450.347	82.6057	0.00180642	0.00860904	3.40527e-05	0.00174485	0.00854235	0.00315628	0.00232557	0.011959	0.080256	0.0181774	0.0216068	0.0164675	0.00620127	0.0264153	0.0199637	0.0103333	0.000954771	0.0119546	0.0133988	0.0209153	0.0142411	0.000265369	0.00922553	0.0153873	0.000503727	0.00275581	0.000199781	0.00418188	0.00480563	0.00225595	0.0208451	0.0112361	0.00128843	0.0136317	0.00262597	0.00682539	0.011095	0.018714	0.00468079	0.00493032	0.0140809	0.00747674	0.00704794
6383	PE(18:2/18:2)	0.999989			740.521	387.317	3.60241	6.13413	5.31558	6.7435	5.29412	7.26933	6.82822	7.1649	6.30051	8.60673	7.0553	2.94001	5.96967	8.22881	5.77637	7.8471	4.84244	3.84379	7.36048	7.09909	6.21112	5.28704	6.98333	5.89339	5.48843	4.20691	5.23635	5.30908	7.97586	5.80095	5.60933	0.0449865	10.6069	6.55833	6.24267	4.85631	10.012	8.74478	5.59799	3.59509	5.40852	5.97291	5.48028
3177	LPE(20:3)	0.999854			504.323	100.063	0.0378327	0.0371642	0.0371874	0.0419529	0.0376942	0.0390421	0.0373542	0.0381888	0.0338714	0.0392865	0.0367638	0.0433733	0.0443866	0.0443401	0.0365849	0.0327412	0.0412311	0.0370613	0.0382607	0.0367449	0.0385531	0.0372548	0.0324745	0.034554	0.0358331	0.0383634	0.035318	0.0370454	0.0358262	0.0439454	0.032342	0.0382213	0.0665132	0.0359254	0.030971	0.0390856	0.0412094	0.0445317	0.0338493	0.0386643	0.0383988	0.0385163	0.0393139
2746	LPE(16:0)	0.999854			454.293	92.9822	0.236874	1.15046	0.502436	0.764858	0.683969	0.9035	0.779839	1.25331	1.12568	0.660477	1.25467	0.459384	0.907092	1.01344	1.17128	1.65371	0.781012	0.687484	0.933463	2.19233	0.955764	0.800845	0.696281	0.610532	0.6707	1.05739	0.66479	0.738114	0.986129	0.567566	0.825221	0.837013	1.69741	1.0811	1.07893	0.62257	1.62146	0.761379	1.18728	0.280511	0.862228	0.882372	0.9035
3413	LPE(22:5)	0.999854			528.308	79.5879	0.157554	0.522323	0.101472	0.514195	0.47783	0.58482	0.364381	0.59128	0.474991	0.183986	0.397485	0.262405	0.653268	0.439716	0.358438	0.629936	0.294586	0.49968	0.212949	0.659441	0.419037	0.664186	0.438641	0.283393	0.37769	0.524003	0.384991	0.350316	0.58567	0.296564	0.412922	0.331167	1.01315	0.506615	0.527361	0.37863	0.450656	0.188176	0.474304	0.19502	0.395129	0.438929	0.417917
2947	LPE(18:2)	0.999854			478.292	77.6529	0.117899	0.363673	0.149634	0.363617	0.318062	0.3819	0.355276	0.469128	0.362196	0.360727	0.640109	0.11637	0.324413	0.552619	0.420875	0.635823	0.246664	0.266773	0.317953	0.580063	0.367189	0.509587	0.272186	0.296336	0.202073	0.280876	0.311714	0.330996	0.534474	0.232627	0.391703	0.313962	0.624356	0.388259	0.464555	0.318072	0.860051	0.39606	0.492655	0.114665	0.310746	0.382298	0.354682
3594	PC(18:3e/2:0)	0.9995			546.355	83.9852	0.203571	0.111157	0.350905	0.542445	0.138338	2.3069	1.49529	0.369263	0.527097	0.857276	0.132446	0.396138	0.450944	2.12287	2.26016	0.519883	0.137599	1.30528	0.388007	0.245759	0.743067	0.178352	0.190985	0.23594	0.275629	0.0666754	0.0256334	1.55813	0.324123	0.59615	0.543421	0.942167	3.45687	0.496862	0.776478	0.838981	0.753563	1.46409	0.887264	0.938342	1.46725	0.800845	0.652206
6638	PC(18:5e/18:5)	0.999496			756.515	238.166	0.0874703	0.317813	0.0460421	0.301522	0.22651	0.249877	0.0761248	0.315801	0.152253	0.039052	0.252741	0.0937522	0.202557	0.208682	0.199924	0.326863	0.135596	0.187755	0.0627033	0.259239	0.187114	0.210526	0.230001	0.207712	0.142214	0.317786	0.167285	0.0743249	0.406576	0.0564284	0.129477	0.0953998	0.303842	0.29644	0.191519	0.153846	0.209795	0.0339435	0.158438	0.0976787	0.158448	0.182084	0.175859
8245	PC(18:5e/24:4)	0.999452			842.588	329.378	0.120709	0.320918	0.0381755	0.359978	0.267405	0.141137	0.104154	0.289251	0.144068	0.0438741	0.251708	0.0822855	0.187501	0.147063	0.0805881	0.250969	0.208951	0.169191	0.0525341	0.149547	0.1705	0.3032	0.236822	0.204881	0.135691	0.300398	0.193279	0.0868803	0.322607	0.123889	0.0977344	0.141288	0.488904	0.181347	0.205704	0.249362	0.156592	0.0469391	0.21706	0.0562025	0.122408	0.193559	0.176288
3572	PC(18:4e/2:0)	0.999312			544.339	75.4294	0.261473	1.35846	0.717149	1.04537	0.975275	1.39728	1.36587	2.32876	2.86122	1.33339	2.82593	0.975834	1.55736	2.09139	1.79849	2.24318	1.25785	1.34105	1.11352	2.34646	1.55976	1.47069	1.02666	1.61712	0.569247	1.68547	0.88742	2.20419	1.8887	1.5774	2.43829	1.67074	3.32089	2.08419	2.31715	1.11475	3.30772	1.13296	2.2196	0.523789	1.05526	1.70561	1.5258
8204	PC(20:4e/22:6)	0.999289			840.573	256.957	0.0653926	0.231899	0.0282048	0.211951	0.127554	0.11904	0.0469213	0.191585	0.0882764	0.0187475	0.128861	0.0459908	0.114784	0.0812348	0.145606	0.150056	0.0987168	0.0825273	0.0302674	0.105201	0.105641	0.129264	0.110802	0.0821053	0.0677905	0.189177	0.0797134	0.0482998	0.144547	0.0404318	0.0709073	0.0491513	0.227834	0.0882649	0.144564	0.0930055	0.0959575	0.0239946	0.116371	0.0473109	0.0813731	0.0965432	0.0993624
7097	SM(d14:1/26:2)	0.99858			783.607	507.111	0.154879	0.302472	0.215642	0.443425	0.332265	0.288505	0.234115	0.224184	0.403323	0.395176	0.221998	0.239571	0.155298	0.425915	0.235709	0.168335	0.307384	0.255344	0.214769	0.241764	0.273004	0.625841	0.389853	0.234758	0.482088	0.284779	0.39401	0.298971	0.341372	0.402496	0.195518	0.308683	0.60747	0.253481	0.324942	0.371025	0.465678	0.495682	0.324767	0.335137	0.243743	0.369015	0.304924
7687	PC(18:3e/22:6)	0.998502			814.559	248.208	0.195478	0.662288	0.0796022	0.60062	0.485917	0.497983	0.0892658	0.678942	0.265045	0.0448265	0.360504	0.16831	0.396749	0.265544	0.334705	0.552043	0.350266	0.296446	0.101212	0.500569	0.346316	0.419229	0.471415	0.461594	0.312411	0.562797	0.329789	0.173681	0.732645	0.134654	0.262272	0.243686	0.670458	0.411415	0.364504	0.372429	0.289434	0.0841808	0.279792	0.171496	0.313576	0.353073	0.342005
7729	PC(18:2e/22:6)	0.998226			816.57	248.085	0.0630153	0.244281	0.0236025	0.217231	0.21121	0.122055	0.0389654	0.189107	0.0795216	0.025993	0.110424	0.05446	0.243862	0.128623	0.183761	0.174269	0.0805878	0.118486	0.0354407	0.157022	0.125096	0.169725	0.144034	0.115464	0.0871225	0.17709	0.186417	0.0744363	0.315703	0.0559638	0.0864334	0.0761032	0.147679	0.124693	0.0919517	0.139947	0.0948964	0.0394276	0.1307	0.0472448	0.0871576	0.119609	0.123733
2967	LPE(18:1)	0.998057			480.298	77.9189	0.00102049	0.0071097	0.000613937	0.00452149	0.00550013	0.00815379	0.00571455	0.0118647	0.00360607	0.00911995	0.0159752	0.00295663	0.00500741	0.0121531	0.00756782	0.0227961	0.00370769	0.0037736	0.00568894	0.0168234	0.00768374	0.0149086	0.00503937	0.00443003	0.0019004	0.00409477	0.00774948	0.00556259	0.0153458	0.00386722	0.0073175	0.00499808	0.00955944	0.00574491	0.00864051	0.00472775	0.0257446	0.00959772	0.0104572	0.0030008	0.00310535	0.00778961	0.00785766
2172	ACar(16:3)	0.997711			394.295	63.8266	0.00361857	0.0223317	0.0201791	0.00301486	0.00858351	0.0359851	0.0650315	0.0685448	0.20797	0.0933607	0.0811708	0.0229576	0.0300348	0.152165	0.0466439	0.0663295	0.0725365	0.114683	0.10582	0.119033	0.0669997	0.00474697	0.00217327	0.0482664	0.0106035	0.0309292	0.0149928	0.0798258	0.072759	0.0826477	0.0936628	0.0532411	0.0384127	0.126039	0.0411224	0.0138916	0.247312	0.269931	0.0844291	0.0754658	0.0613895	0.0725921	0.0698576
3375	PC(14:0e/4:0)	0.99767			524.334	94.9883	0.0365808	0.101849	0.0450588	0.0622735	0.0732466	0.0928281	0.110577	0.0890164	0.0780799	0.0552375	0.111087	0.073128	0.101958	0.0869865	0.096538	0.258073	0.0792426	0.106256	0.0453735	0.121756	0.0912573	0.102282	0.0376451	0.0575606	0.0382338	0.0535172	0.0563348	0.0414159	0.113792	0.0230809	0.0699886	0.0373794	0.0860166	0.0634467	0.0635439	0.059611	0.0767605	0.02029	0.0675832	0.0889744	0.156597	0.0657027	0.0891071
6411	PE(18:1/18:2)	0.997158			742.527	411.742	1.1755	3.32275	3.19678	3.23302	3.43073	4.34106	3.7912	4.12601	4.07689	3.58044	3.01733	2.90053	3.22371	3.9055	3.83717	3.71098	3.35769	3.05576	3.80554	4.91286	3.50007	3.20787	3.28074	3.42885	3.03513	2.91965	3.02331	3.30158	4.0498	3.78107	4.08518	4.23975	6.86772	4.29856	3.13622	2.78157	4.57676	4.52238	3.25987	2.28833	3.50498	3.67947	3.32705
5996	PE(16:0/18:2)	0.996726			716.559	446.866	0.706395	2.24721	1.27919	1.62014	1.14109	1.41771	1.53782	1.73707	2.34542	1.57874	1.66893	1.94071	1.27791	2.17574	1.96115	2.01735	1.53674	1.73415	1.83916	1.84623	1.68044	2.60547	1.02493	1.40058	1.61704	1.90914	1.67719	1.65437	1.94186	1.5544	2.37639	1.72537	2.42425	2.11063	1.37014	1.6227	2.80882	1.97142	1.66379	1.57204	2.05415	1.85423	1.76011
7184	PE(20:4/20:4)	0.996377			788.511	330.7	0.00164079	0.0253273	0.0146813	0.00460396	0.0129691	0.0185267	0.0131884	0.0487591	0.0606496	0.0486095	0.011774	0.0105884	0.0184946	0.0247365	0.0351146	0.0215185	0.014113	0.00693121	0.0206529	0.0184039	0.0215642	0.0247703	0.0371483	0.032243	0.0178249	0.0188223	0.00909122	0.0356378	0.0303625	0.016999	0.0159565	0.0425961	0.0372824	0.0326765	0.0620663	0.0346895	0.0492175	0.0404051	0.0321349	0.00319336	0.0254894	0.0299303	0.0179849
7763	PC(18:1e/22:6)	0.996319			818.588	268.043	0.390026	0.277323	0.0489018	0.437877	0.213649	0.242638	0.135825	0.197949	0.0934608	0.0632929	0.286257	0.0842024	0.404312	0.567939	0.147608	0.6996	0.156124	0.179908	0.143132	0.468395	0.261921	0.272663	0.153658	0.420335	0.130159	0.217081	0.649374	0.07244	0.236268	0.0898463	0.165173	0.0659556	0.244195	0.108877	0.375433	0.503773	0.188623	0.0975686	0.189789	0.364638	0.484234	0.251504	0.147601
3147	LPE(20:4)	0.996278			502.293	75.1279	1.05552	3.56497	1.05142	3.31992	3.29259	3.13813	2.21674	4.55241	2.97268	1.37052	4.72884	1.87082	3.14586	3.05726	3.68288	3.94184	2.08422	2.70288	0.931817	4.57748	2.86294	2.30642	2.78878	3.5148	1.8887	3.90934	3.05941	2.29561	4.92331	1.73442	3.28175	2.24999	4.80268	3.97183	3.3154	2.98539	4.0197	1.65895	3.24866	1.47711	2.92041	3.01763	3.01164
5834	PC(14:0e/17:0)	0.99627			706.581	397.926	1.62854	3.71117	3.31013	4.39238	3.28248	3.62364	3.51877	3.58519	4.44756	3.46385	3.99583	2.74043	3.33934	4.12725	3.59683	3.86704	3.30364	3.30668	3.52392	4.00377	3.53842	4.64688	2.97126	3.70178	3.03544	3.54706	3.25585	3.71728	4.24698	3.87291	3.92885	3.84347	5.50153	4.34554	4.00966	3.37631	5.07472	4.07169	3.79667	2.45449	3.60597	3.85022	3.54017
9051	BMP(22:5/22:6)	0.996183			886.556	260.236	0.00940246	0.0474403	0.0637524	0.036396	0.0596323	0.0327826	0.0759637	0.0766736	0.142175	0.0700559	0.0730447	0.0472941	0.0389844	0.0917937	0.0863831	0.064874	0.0924681	0.0670714	0.0443995	0.139883	0.0680235	0.0670863	0.044558	0.080551	0.0337025	0.0642241	0.0664172	0.0772321	0.0778724	0.0804857	0.0776456	0.0595084	0.200536	0.0645429	0.0622232	0.0494488	0.0959186	0.0896766	0.0749887	0.0335804	0.0641667	0.0732182	0.0663116
3326	PC(16:2e/2:0)	0.996138			520.332	43.5327	0.0122368	0.0145555	0.0113281	0.0148263	0.0104349	0.0190906	0.00870325	0.0137732	0.0161737	0.0155013	0.0135359	0.00916232	0.0134745	0.0182788	0.0105118	0.0195626	0.0151308	0.0138322	0.0120083	0.018208	0.0140164	0.0142481	0.0278589	0.0135779	0.0161991	0.0140684	0.0197291	0.0142904	0.0159034	0.0134494	0.013738	0.0140673	0.022008	0.0168331	0.0113667	0.0135237	0.0191193	0.0152335	0.0133438	0.0117207	0.0156099	0.0157944	0.015656
7189	PG(18:2/18:2)	0.996014			788.542	291.86	0.0250565	0.083021	0.0728972	0.0964016	0.0876347	0.0811097	0.0795007	0.123945	0.15705	0.140797	0.110334	0.114364	0.0864926	0.173025	0.112301	0.129542	0.0782432	0.0822304	0.110424	0.182974	0.106367	0.123009	0.0742283	0.0812965	0.0566821	0.126396	0.0937297	0.101663	0.080829	0.109429	0.0980534	0.0943532	0.130297	0.132793	0.0763336	0.0630465	0.170893	0.145901	0.153011	0.0788725	0.129554	0.106018	0.101548
8122	PE(22:6/22:6)	0.995878			836.517	340.417	0.00309541	0.0555646	0.0428352	0.0122905	0.0410794	0.0505048	0.0783844	0.113734	0.15504	0.124419	0.0899394	0.0604065	0.0466351	0.154709	0.115458	0.0796106	0.0633748	0.0362598	0.0828133	0.129079	0.0767617	0.057856	0.078174	0.194293	0.0533068	0.0526555	0.0650332	0.0880316	0.113575	0.0529282	0.147182	0.114054	0.10093	0.267161	0.18679	0.16679	0.205123	0.229318	0.184063	0.0131851	0.0761851	0.122332	0.121409
2701	ACar(20:4)	0.995736			448.341	83.0671	0.0815045	0.0577239	0.0723193	0.101762	0.264448	0.160061	0.1666	0.388023	2.09516	0.539833	0.571762	0.418907	0.264017	0.657551	0.554425	0.357595	0.118281	0.441744	0.407366	0.575789	0.414744	0.0461607	0.0388991	0.445906	0.0320383	0.113764	0.0292525	0.21816	0.236831	0.170284	0.516338	0.163406	0.0704725	0.424057	0.155662	0.245677	0.425875	0.590046	0.30287	0.274029	0.401421	0.245057	0.286113
6732	PE(16:1/22:6)	0.995302			762.505	352.134	0.0849955	0.832455	0.336389	0.391139	0.294882	0.422659	0.408088	0.720083	1.05036	0.579296	0.628012	0.293756	0.637269	0.739688	0.709741	1.10596	0.421817	0.313341	0.599319	0.875413	0.572233	0.67532	0.549394	0.551337	0.654752	0.427846	0.357755	0.71425	0.805906	0.405676	0.636571	0.833482	0.625527	1.15799	0.76048	0.560134	0.833181	0.640456	0.832166	0.177167	0.411284	0.630534	0.555316
7223	BMP(18:1/18:2)	0.994854			790.557	300.48	0.0338218	0.133481	0.0892202	0.24811	0.104531	0.11424	0.0876364	0.0749514	0.106993	0.118773	0.141211	0.0615899	0.0600816	0.117315	0.0865639	0.151874	0.0760814	0.0739421	0.0897751	0.222091	0.109614	0.190711	0.0769558	0.117841	0.0784921	0.119175	0.0775554	0.129543	0.139851	0.121674	0.143014	0.134031	0.144294	0.112253	0.0711007	0.0750284	0.172827	0.138289	0.0769211	0.0694066	0.0726512	0.113081	0.0996238
2192	ACar(16:2)	0.994535			396.31	69.1831	0.000156614	0.0173338	0.0101684	0.00290545	0.0078771	0.0260736	0.0516637	0.133954	0.776713	0.181448	0.233792	0.0772742	0.0612743	0.202778	0.0587796	0.176632	0.0211313	0.139538	0.214479	0.251644	0.132281	0.0110322	0.002639	0.103119	0.00144368	0.042637	0.00799447	0.136148	0.0834673	0.0723931	0.213563	0.0354842	0.0172499	0.31556	0.0835121	0.0115212	0.403227	0.461054	0.0583418	0.0566285	0.11063	0.111382	0.122875
2435	ACar(18:2)	0.994269			424.362	102.835	0.0347893	0.0212944	0.0497745	0.0428844	0.0389934	0.0332254	0.0385193	0.102983	0.450583	0.0515963	0.0471201	0.262169	0.0261574	0.00913275	0.0300302	0.0803775	0.0366139	0.0133277	0.0438347	0.0805503	0.0746979	0.0871529	0.083986	3.55792e-05	0.0560901	0.0230877	0.0645663	0.144336	0.0402283	0.0452109	0.193964	0.0316543	0.0911092	4.08225e-05	0.0502561	0.0314487	4.2441e-05	3.88996e-05	0.0216942	0.0279267	0.0536961	0.0523283	0.0448881
7115	PC(20:5e/18:5)	0.994268			784.546	349.322	0.0508407	0.287181	0.129957	0.316002	0.166819	0.130817	0.113844	0.260458	0.0836853	0.125053	0.259679	0.102764	0.17123	0.0645483	0.147218	0.222121	0.0757845	0.0591353	0.114987	0.179909	0.153102	0.188611	0.111106	0.120602	0.0512305	0.257276	0.171029	0.127406	0.32514	0.136433	0.149538	0.141158	0.169487	0.0991836	0.13429	0.137979	0.0655824	0.109604	0.15002	0.073778	0.0839061	0.140168	0.102186
5964	PE(16:1/18:2)	0.993801			714.507	375.525	0.115141	0.723446	0.212262	0.594937	0.27183	0.364229	0.429264	0.58545	0.61863	0.499036	0.57019	0.198255	0.599892	0.705949	0.529191	0.952626	0.331533	0.279616	0.675183	0.6987	0.497768	0.698662	0.416123	0.472785	0.571545	0.528592	0.344858	0.481113	0.640109	0.390089	0.414882	0.769419	0.749151	0.715162	0.460946	0.505452	0.678362	0.654716	0.532411	0.210626	0.471896	0.535345	0.46877
6758	PE(18:2/20:4)	0.993398			764.517	351.926	0.0290932	0.410938	0.064321	0.103892	0.0896733	0.117511	0.0868447	0.148064	0.155221	0.0832373	0.361918	0.0703138	0.12451	0.139129	0.118092	0.145401	0.0941121	0.0829111	0.0894564	0.16468	0.133966	0.156179	0.102916	0.129638	0.124799	0.116141	0.099602	0.125443	0.199113	0.0823657	0.307989	0.147036	0.162031	0.200762	0.14316	0.122618	0.172025	0.113016	0.146003	0.0901176	0.110859	0.142591	0.117839
7295	TAG(14:0/16:0/16:1)	0.99215			794.721	689.841	0.104703	0.115509	0.0860014	0.118358	0.0354087	0.0870354	0.102063	0.268245	0.176047	0.27625	0.0630289	0.37298	0.903476	0.262058	0.161285	0.234325	0.0864656	0.425023	0.0835559	0.137847	0.204983	0.114771	0.350598	0.0648984	0.164055	0.127575	0.0581385	0.139879	0.114336	0.133809	0.0740024	0.126812	0.171084	0.119906	0.0579549	0.096629	0.13131	0.113579	0.280623	0.725799	0.113687	0.163972	0.27716
7639	PE(20:4/22:6)	0.991875			812.521	353.56	0.0946527	0.972701	0.727653	0.495032	0.633205	0.968235	1.19912	1.59305	2.13212	1.73246	1.46428	0.757619	0.763126	1.69684	0.935281	0.888401	0.901039	0.587693	0.991561	1.99171	1.07629	1.10524	1.02851	1.68691	0.763328	0.611019	0.778138	1.4467	1.30413	1.00721	1.7115	1.51031	1.72377	3.54004	1.83531	0.969465	2.81328	2.3314	1.04127	0.29953	0.864888	1.4186	1.22058
6754	PE(16:0/22:6)	0.991744			764.522	398.999	2.02883	7.47205	7.02156	6.54503	6.72511	8.84383	7.9322	9.13138	13.5333	12.3915	7.72835	9.03788	8.68356	14.201	9.37892	9.76391	8.74422	6.21444	8.83097	11.6841	8.7946	9.49419	8.01471	12.462	8.08567	7.98527	7.73888	9.30094	12.3172	9.04223	11.4165	12.8974	14.109	13.9077	10.036	11.0767	12.9168	15.0984	12.5684	5.96363	9.85998	10.7146	9.46701
6003	PE(8:0/26:2)	0.991435			716.578	381.322	0.116624	0.195628	0.0965307	0.193085	0.235377	0.177275	0.142288	0.202609	0.209266	0.138827	0.205128	0.122262	0.176146	0.0840192	0.111246	0.215772	0.173383	0.136867	0.186443	0.166615	0.16427	0.291865	0.10088	0.252762	0.123485	0.305745	0.158133	0.12403	0.155481	0.183846	0.20169	0.133047	0.402552	0.225378	0.166844	0.135558	0.372256	0.14397	0.17722	0.158158	0.0864497	0.194967	0.179356
7675	PE(24:4/18:5)	0.991327			814.537	378.549	0.208844	2.4905	1.8749	2.29379	1.63486	2.41605	2.90132	3.51709	3.69114	3.38155	3.22533	1.89971	3.13672	4.7019	2.55609	1.77887	2.14572	1.464	2.12746	3.01839	2.52321	2.99267	2.48093	3.3034	2.13385	1.89546	1.31559	2.8077	3.15322	2.28366	3.19314	2.6191	5.48582	4.57077	7.1906	2.06085	3.86499	3.0986	2.75754	0.940581	1.76231	2.99554	2.46105
6348	PE(14:0/22:5)	0.990799			738.505	367.029	0.102256	0.829819	0.341687	1.22947	0.343034	0.533604	0.528309	0.6147	0.942853	0.472387	1.15364	0.343386	0.681291	0.828486	0.518684	1.07479	0.448006	0.393464	0.79648	0.940901	0.655862	0.675283	0.385962	0.470361	0.699645	0.543893	0.455389	0.754038	0.813337	0.654644	0.728104	1.00613	0.775654	1.2105	0.497381	0.524358	0.950009	0.771885	0.574723	0.29053	0.518541	0.665018	0.632635
6753	PG(17:1/17:1)	0.990515			764.544	323.38	0.00796449	0.037559	0.0332469	0.0426413	0.0369688	0.0429806	0.0469368	0.0435773	0.0820739	0.0647597	0.0321774	0.0269929	0.0266624	0.0602085	0.0389265	0.0600618	0.0452315	0.0228228	0.0508943	0.0824741	0.044258	0.0988357	0.0331735	0.0447422	0.0439078	0.0422842	0.0534989	0.0778306	0.0644531	0.0608475	0.0591812	0.0630114	0.0682028	0.0742978	0.0432098	0.032263	0.113805	0.101016	0.0409952	0.0159029	0.035587	0.0583523	0.048897
9019	BMP(22:6/22:6)	0.990515			884.543	227.229	0.0100692	0.0572309	0.0585832	0.0143094	0.0421696	0.0231803	0.0582058	0.111591	0.227687	0.0689961	0.0763242	0.110667	0.0168	0.138555	0.0708356	0.0794568	0.0749077	0.036799	0.0454638	0.110702	0.0716267	0.0824068	0.049939	0.263952	0.0331741	0.0817794	0.0858607	0.0889788	0.0904315	0.0577514	0.0455231	0.101201	0.153315	0.0807736	0.071622	0.0714802	0.124069	0.115364	0.134845	0.0381925	0.100559	0.0935609	0.0833542
6784	PE(16:0/22:5)	0.990311			766.536	431.67	0.892898	2.67089	2.47938	4.0256	3.04846	3.5417	3.39599	3.68813	4.03729	3.29879	3.29142	2.24537	4.12013	4.09039	4.11171	4.23405	3.49983	2.9954	3.53024	5.11806	3.41579	3.89238	2.63196	3.61776	2.38915	3.09879	2.86326	3.43127	3.63736	4.2008	4.19091	3.36667	6.74604	3.79882	2.91205	2.97129	5.03877	4.77545	3.18544	2.07555	2.43193	3.56278	3.54236
6790	PG(16:0/18:1)	0.990235			766.558	356.757	0.185872	1.23628	0.636039	1.33444	1.13416	1.19952	0.98641	1.25271	2.23524	1.42375	1.11785	0.674955	0.992026	1.42379	1.1356	1.4739	0.92557	0.858685	1.13376	2.22317	1.17919	2.2772	0.989362	1.67389	1.37561	1.4367	1.20413	1.75649	1.9719	1.20982	1.5891	1.61593	1.63766	2.15333	1.09804	1.11071	1.85031	1.7278	1.26765	0.418391	1.04028	1.47021	1.38192
5298	SM(d14:0/18:1)	0.989444			675.542	367.061	0.0120149	0.307426	0.17709	0.346637	0.165486	0.234018	0.247232	0.280003	0.336672	0.233375	0.325166	0.174402	0.360317	0.517876	0.234475	0.435896	0.200591	0.2065	0.271247	0.333596	0.270001	0.592068	0.219964	0.321779	0.237106	0.310577	0.279777	0.344756	0.330149	0.423543	0.263119	0.359052	0.473887	0.462816	0.32011	0.248354	0.783214	0.508446	0.3393	0.176953	0.178127	0.358655	0.307891
7219	PE(16:3/24:4)	0.98828			790.535	390.714	1.3162	3.37963	3.25312	2.9104	3.33555	3.41555	4.21808	4.81908	5.00743	3.89886	3.60927	3.11713	4.99347	4.73089	3.40137	2.92626	3.73886	2.99848	3.35651	4.65644	3.65413	2.09637	3.25603	3.43114	3.69816	3.29605	2.32304	3.72522	4.15488	4.10281	3.83808	4.06428	10.7249	5.98772	5.20262	2.7498	4.32949	1.07848	2.88082	2.30638	2.73079	3.79885	3.59949
8613	TAG(17:0/17:1/17:1)	0.987997			862.735	728.8	0.016188	0.0327018	0.0360976	0.0151829	0.0283631	0.0210835	0.0326336	0.0198877	0.0244213	0.0346657	0.0351452	0.0347535	0.00949182	0.359288	0.0167721	0.732265	0.0111129	0.0130855	0.014567	0.0160674	0.0751887	0.0512115	0.0179042	0.0467867	0.0317311	0.0163663	0.0191316	0.0400641	0.0477237	0.0522058	0.0291007	0.0444882	0.0464638	0.0443995	0.025092	0.0468732	0.0417902	0.0390531	0.019058	0.0458019	0.0264891	0.0365867	0.0263139
6827	TAG(14:0/14:0/16:0)	0.987927			768.706	687.087	0.0351028	0.0386343	0.0362898	0.0395434	0.0159192	0.0287329	0.0503467	0.0961638	0.0479087	0.0808673	0.0210045	0.0906675	0.24841	0.0692878	0.0492261	0.0800521	0.0220902	0.10929	0.0304818	0.0488987	0.0619458	0.0373431	0.13317	0.0241219	0.0532683	0.0428986	0.0244766	0.0509354	0.0343467	0.0437148	0.0290348	0.0517311	0.0656214	0.047344	0.0323221	0.0321512	0.04982	0.0324918	0.0810974	0.357493	0.0336419	0.0628512	0.100236
8655	TAG(16:0/17:0/18:1)	0.987356			864.799	735.995	0.177313	0.133962	0.155018	0.287883	0.138308	0.120086	0.0952542	0.181899	0.220138	0.336209	0.136151	0.553224	0.757437	0.253266	0.220225	0.599404	0.133171	0.353483	0.140561	0.149335	0.257116	0.232084	0.167129	0.094345	0.152653	0.190788	0.090476	0.13131	0.109272	0.308027	0.0864671	0.165848	0.179197	0.140308	0.0726677	0.174285	0.156516	0.112236	0.272367	0.518775	0.158088	0.175642	0.32163
7568	TAG(15:0/16:0/16:1)	0.987263			808.737	700.244	0.0762844	0.0851589	0.075599	0.0725478	0.0264935	0.0683107	0.0299237	0.214424	0.0838118	0.235089	0.0414772	0.0875459	0.200863	0.111178	0.0733652	0.1152	0.0403842	0.165747	0.0479901	0.112942	0.0982168	0.0505232	0.357321	0.0462882	0.0703087	0.0579123	0.0426965	0.118893	0.047541	0.0436138	0.0402454	0.0543854	0.0952071	0.0870883	0.034464	0.042608	0.0719524	0.0620427	0.0769951	0.107925	0.0922971	0.0800154	0.19553
5560	PE(16:0/16:1)	0.986731			690.506	408.991	0.19896	0.631281	0.263921	0.487564	0.32375	0.416253	0.557455	0.445772	0.447362	0.222768	0.33628	0.304722	0.665717	0.623731	0.765826	0.849279	0.608155	0.391244	0.382536	0.528645	0.472561	0.5583	0.271075	0.244588	0.603097	0.602112	0.433785	0.552873	0.419587	0.397528	0.446006	0.534894	0.639516	0.743489	0.391189	0.394668	0.821878	0.531276	0.413516	0.393978	0.753148	0.507325	0.410769
5341	SM(d14:0/18:0)	0.98665			677.558	365.799	0.060404	0.403716	0.16127	0.483979	0.176652	0.281942	0.309231	0.326612	0.319555	0.288456	0.363187	0.184899	0.362309	0.480141	0.27279	0.44734	0.300202	0.235966	0.282182	0.328284	0.303456	0.658925	0.199539	0.256503	0.284929	0.404572	0.224454	0.308589	0.388659	0.376983	0.358722	0.335583	0.500382	0.459732	0.265105	0.281592	0.889691	0.536872	0.307271	0.190539	0.283065	0.375585	0.316887
7889	TAG(16:0/16:0/16:0)	0.985103			824.724	752.044	0.0179262	0.079777	0.0108528	0.0491142	0.046868	0.0243626	0.016113	0.0789964	0.00598758	0.0147661	0.0106303	0.00986776	0.00585165	0.0118511	0.114336	0.0322879	0.0305376	0.10207	0.0320554	0.045972	0.0370112	0.0598381	0.0179988	0.00471262	0.0121766	0.0310005	0.00980761	0.0362017	0.0616281	0.00946502	0.00758526	0.0695664	0.0395325	0.0107021	0.0237686	0.123474	0.10081	0.0240847	0.0125595	0.0342135	0.0190962	0.0354111	0.0344753
9239	TAG(18:2/18:2/18:2)	0.984595			896.737	656.495	0.0605343	0.0141613	0.0222715	0.0168618	0.0211802	0.0131434	0.0191392	0.0307549	0.0334459	0.0149693	0.0433005	0.0243714	0.216745	0.0273885	0.00962743	0.0135388	0.00593937	0.0583861	0.0418441	0.0457629	0.0366683	0.0305515	0.0133101	0.00946475	0.0173781	0.0257014	0.0176476	0.0354621	0.018543	0.0157778	0.0192817	0.0136006	0.0432027	0.0111669	0.0302311	0.0148361	0.030379	0.0222273	0.0215505	0.149787	0.0102868	0.0275193	0.0209189
9299	TAG(18:1/18:1/18:2)	0.983983			900.8	716.976	5.0826	3.47832	5.45139	9.1688	2.32034	3.59032	3.00946	2.7203	5.99696	12.4997	5.15674	7.51049	7.4583	5.39972	6.23289	4.87239	7.21927	8.60935	3.65698	5.82446	5.76294	5.98999	2.4439	1.88997	3.82776	3.89517	2.19321	3.33091	3.42255	7.91039	1.96601	3.62969	7.83435	4.66017	2.37191	5.26582	3.91527	4.25856	3.53613	12.3913	7.924	4.63285	4.50644
5820	SM(d14:0/20:0)	0.982764			705.58	397.931	11.2457	28.0593	23.2623	31.4143	22.4451	26.8242	25.5546	29.7383	34.6028	26.0225	29.3501	19.484	24.8301	30.8991	25.8548	28.9927	25.1645	24.6496	26.6852	31.8637	26.3471	36.8534	22.1384	27.6354	22.3148	27.2524	25.9207	28.5572	30.629	29.2287	28.1446	28.6052	40.3082	33.286	29.2879	25.3466	40.509	31.2304	27.2412	18.028	24.357	28.8437	25.8832
6349	PE(18:0/18:5)	0.982612			738.504	419.638	0.221342	0.422606	0.324342	0.495415	0.455747	0.490154	0.498797	0.381799	0.390952	0.560848	0.398168	0.274091	0.399337	0.581178	0.511672	0.409919	0.351577	0.377332	0.487705	0.453536	0.424326	0.462943	0.386795	0.390258	0.396202	0.342069	0.435147	0.333368	0.484611	0.383626	0.362872	0.460292	0.633685	0.413155	0.390145	0.399051	0.486667	0.58839	0.487912	0.30059	0.484623	0.43112	0.410614
6382	PE(10:0/26:4)	0.982612			740.521	412.146	9.97432	28.1452	27.6673	27.8957	29.6605	37.6074	40.7263	35.2749	35.7102	32.2837	25.9436	25.3855	28.3685	35.1176	33.1031	32.7234	30.0237	26.5173	33.3643	43.4526	30.9473	28.7432	29.0739	28.8446	33.4587	25.3259	26.1	29.3521	34.6578	39.8667	34.8544	44.1065	58.8536	38.1342	27.2777	24.7371	39.1374	40.0069	28.3936	23.5375	30.3714	33.2417	28.7683
8169	PE(22:5/22:6)	0.982612			838.559	396.859	0.305243	0.48688	1.72003	1.74165	0.690775	1.61929	2.40459	1.87999	3.09281	1.76923	2.12847	0.844249	1.08373	0.508269	1.01057	1.27135	1.00577	0.580825	2.11752	1.97911	1.41202	1.00249	1.07364	1.49549	2.0292	2.50136	1.11088	2.79981	2.75303	2.97375	0.93968	0.812076	3.60957	2.19665	0.845608	2.21522	1.13773	3.49825	0.551897	1.12292	2.04227	1.83558	1.6333
6347	PE(14:1/22:4)	0.982612			738.507	387.829	0.173117	0.0838809	0.115675	0.073199	0.0630194	0.0722399	0.0597728	0.126069	0.0280222	0.0417842	0.0840428	0.142598	0.123347	0.0812559	0.0913101	0.0576277	0.1089	0.110747	0.0515421	0.0516644	0.0869907	0.088618	0.039834	0.0873703	0.0461586	0.126648	0.0436773	0.0687794	0.0582542	0.0886705	0.0631505	0.0545268	0.0906396	0.0737439	0.0645044	0.0573824	0.0828197	0.0393235	0.0744669	0.151245	0.0664382	0.0733126	0.0706991
7222	PG(14:0/22:3)	0.982612			790.558	332.959	0.0168135	0.0701851	0.088275	0.0732142	0.0902681	0.0909681	0.0429058	0.0575171	0.100334	0.0904618	0.0402117	0.10124	0.0521008	0.0839317	0.0712362	0.147184	0.0500074	0.0413763	0.0422094	0.0945915	0.0722516	0.153996	0.0997709	0.0506358	0.0788355	0.0648958	0.0673392	0.0798816	0.171583	0.160817	0.125885	0.0846848	0.186178	0.181459	0.0862017	0.0683601	0.176533	0.160264	0.064525	0.0385361	0.0630595	0.108172	0.0677736
3739	PE(3:0/20:4)	0.982612			558.377	100.148	0.131125	0.124481	0.124543	0.105666	0.122596	0.117514	0.128388	0.0988148	0.0936691	0.122994	0.10137	0.157436	0.106823	0.122604	0.145661	0.0608538	0.0996647	0.108451	0.146056	0.0686908	0.11437	0.146827	0.0596796	0.164972	0.130413	0.129008	0.130827	0.117912	0.156052	0.137873	0.147517	0.141863	0.218346	0.140584	0.122461	0.15286	0.132825	0.145324	0.133786	0.121007	0.183421	0.140678	0.15669
3428	PE(5:0/16:4)	0.982612			530.287	78.0228	0.434674	0.477422	0.515057	0.721066	0.728004	0.649646	1.0346	0.573414	0.627009	0.581767	0.634663	0.526067	0.650383	0.798237	0.696117	0.94977	0.496711	0.748114	0.509849	1.08392	0.671824	0.648359	0.317634	0.551514	0.285728	0.379033	0.497681	0.336273	0.816573	0.317404	0.444893	0.347414	0.71125	0.491782	0.386393	0.661941	0.558508	0.288436	0.441018	0.66955	0.751123	0.495125	0.673046
7812	TAG(16:0/16:1/16:1)	0.982548			820.738	692.267	0.402759	0.297022	0.258281	0.651187	0.160318	0.238522	0.323948	0.565659	0.680351	0.753141	0.380911	1.4886	2.43581	0.957632	0.572244	0.910449	0.393981	1.43175	0.30761	0.344639	0.677741	0.417347	0.465027	0.160524	0.440649	0.415603	0.176281	0.31095	0.421785	0.589565	0.205072	0.431352	0.470125	0.36132	0.199704	0.441533	0.416107	0.375439	0.877151	2.8296	0.372798	0.518897	0.667916
7628	SM(d14:1/28:2)	0.98247			811.667	512.673	5.09216	28.0345	20.7436	28.5662	18.8552	23.677	22.0314	26.6377	29.6617	30.2735	31.5899	12.9312	19.8888	35.2243	24.4601	25.1754	21.1076	16.7582	23.6693	35.8971	24.0137	34.7258	19.0996	21.3024	17.9746	24.294	18.7005	22.8549	28.4657	20.5347	27.1019	22.2854	38.3856	34.597	28.1698	16.9357	45.6241	32.4636	24.2318	11.4634	16.5161	25.2863	23.8407
7259	TAG(12:0/16:0/18:2)	0.982198			792.705	671.316	0.0439124	0.0485984	0.0357261	0.0498802	0.0118251	0.0384141	0.0447757	0.119299	0.0740262	0.134544	0.0286501	0.143167	0.277148	0.110634	0.0523766	0.102342	0.0311951	0.147877	0.0324565	0.0577839	0.0792315	0.0521246	0.14302	0.0209919	0.0610024	0.0574406	0.0230013	0.060617	0.0431517	0.0633627	0.0297716	0.0516464	0.0684773	0.0552829	0.021552	0.0431649	0.0621994	0.0528914	0.127812	0.352625	0.045502	0.0717819	0.111979
8773	TAG(16:1/18:2/18:2)	0.981358			870.702	711.574	0.0546782	0.0280061	0.0339681	0.0897979	0.036851	0.0233765	0.0420375	0.051006	0.05957	0.0602322	0.047411	0.0985561	0.134319	0.0739133	0.0722888	0.0993627	0.0550512	0.110893	0.0450364	0.0444386	0.0630397	0.0425639	0.0312492	0.0307866	0.0388979	0.0436528	0.0216537	0.0336689	0.0565415	0.0644079	0.0289388	0.042961	0.0618374	0.0401074	0.0199362	0.039584	0.0379364	0.0525376	0.0751875	0.133608	0.0453677	0.0470712	0.0450219
3347	PC(14:1e/4:0)	0.981313			522.346	79.5424	0.003378	0.0400941	0.00871233	0.0283527	0.0267239	0.0533328	0.144347	0.0819349	0.0858266	0.0748382	0.118258	0.0128373	0.0472371	0.103038	0.069927	0.14299	0.0397985	0.0378891	0.152187	0.274439	0.0773071	0.0633592	0.0310676	0.0390195	0.012766	0.0369236	0.032844	0.0882075	0.0837896	0.0495466	0.0829122	0.0622438	0.134862	0.0671572	0.201871	0.0441083	0.232999	0.0790587	0.149833	0.00605872	0.0879967	0.0793312	0.0587007
9057	PC(22:4/22:4)	0.981282			886.63	449.438	0.13897	0.664375	0.558712	0.634576	0.423706	0.587332	0.797404	0.809883	0.708811	0.483385	0.888819	0.460035	0.567342	0.699004	0.761666	0.644578	0.603253	0.61427	0.814304	0.766098	0.631326	0.622874	0.403218	0.652251	0.35868	0.961574	0.330921	0.794763	0.635919	0.696286	0.951967	0.749722	1.5475	1.20425	0.689742	0.404387	1.3292	0.801178	0.807259	0.600032	0.477788	0.750976	0.661395
8581	TAG(17:1/17:1/17:1)	0.980874			860.803	741.013	0.135088	0.144149	0.110335	0.325067	0.107057	0.11341	0.109113	0.0723741	0.131258	0.23353	0.187596	0.0599297	0.168165	0.149992	0.0700413	0.174513	0.0576202	0.151635	0.0949954	0.0841494	0.134001	0.213394	0.0924092	0.127227	0.0689216	0.085074	0.0477797	0.143715	0.105548	0.199502	0.053736	0.121943	0.171797	0.161799	0.0841333	0.155353	0.120853	0.117357	0.0948346	0.362472	0.106804	0.131733	0.119917
6919	PC(18:4/18:4)	0.980613			774.527	209.144	0.118824	0.447493	0.0660353	0.361374	0.359907	0.286954	0.108761	0.417143	0.288773	0.0428095	0.302215	0.151578	0.24602	0.180334	0.371017	0.293565	0.181432	0.286331	0.0776714	0.388426	0.248833	0.327853	0.217885	0.236028	0.163188	0.254124	0.238195	0.131361	0.640726	0.0673337	0.252779	0.129378	0.356561	0.279383	0.195059	0.216461	0.180471	0.0577909	0.405419	0.144982	0.22381	0.235939	0.273332
7004	PC(18:3/18:3)	0.980391			778.535	347.599	0.0440586	0.25907	0.10169	0.165668	0.159244	0.201817	0.234397	0.302182	0.433426	0.202057	0.30339	0.203479	0.237348	0.398301	0.242505	0.366009	0.215571	0.194132	0.173723	0.340511	0.238929	0.492745	0.196761	0.293101	0.19283	0.242495	0.201802	0.285579	0.312961	0.311548	0.278263	0.374211	0.47308	0.429059	0.272146	0.270021	0.54092	0.507804	0.354076	0.150855	0.187424	0.318384	0.266258
8499	PC(24:4/18:5)	0.980309			856.567	275.879	0.0287855	0.1329	0.00866364	0.153245	0.122359	0.0431251	0.0170245	0.0988564	0.0566612	0.000737042	0.0811578	0.031012	0.0558868	0.0235324	0.0424838	0.0490597	0.0323312	0.0413181	0.00639994	0.0297554	0.0527647	0.0728358	0.0414114	0.0875059	0.0199167	0.161779	0.0454938	0.00845407	0.156286	0.00970991	0.0384588	0.0224972	0.0731336	0.0584484	0.11502	0.0351927	0.0433574	0.0218519	0.0354747	0.00722524	0.0293147	0.0541684	0.0470158
3988	PC(2:0/19:0)	0.979826			580.396	115.906	0.0291986	0.0900473	0.0305725	0.0647929	0.12589	0.0640164	0.0579056	0.0391661	0.0618539	0.0302564	0.0987953	0.0258789	0.0537318	0.062615	0.0530067	0.0590397	0.0472918	0.0628017	0.0333908	0.077149	0.05837	0.0480104	0.0923959	0.213503	0.0659639	0.131612	0.0818003	0.0680122	0.124124	0.0458306	0.102347	0.0562272	0.128963	0.125644	0.0621519	0.0563358	0.131345	0.0444538	0.124469	0.0244694	0.0814858	0.0904573	0.0762396
3890	PC(3:0/18:4)	0.979805			572.297	50.8923	3.3905e-05	0.00281546	0.000431483	0.00388869	0.00122082	0.00242148	0.00456755	0.00254628	0.00430426	0.00282321	0.00658754	0.0001464	0.0012477	0.00478153	0.00282575	0.00386133	0.00153376	0.000732823	0.00113265	0.00234699	0.00251248	0.00462711	0.00176808	0.00855177	0.000422723	0.00341488	0.000734703	0.00354024	0.002455	0.00119592	0.0112218	0.00130404	0.00700342	0.00688876	0.00509571	0.00117486	0.0130568	0.00280071	0.00409597	0.000184703	0.000709806	0.00401235	0.00219573
5543	SM(d14:0/19:1)	0.979581			689.557	388.352	0.422969	0.917123	0.582539	0.781145	0.796351	0.824006	0.691036	0.838734	0.943144	0.701389	1.03944	0.559126	0.904548	0.904189	0.763247	1.089	0.747159	0.638774	0.740032	0.687454	0.778571	1.377	0.606925	0.76885	0.700929	0.985338	0.724298	0.76241	0.687604	0.936755	1.04909	0.770433	1.42977	1.05465	0.99604	0.680857	1.38292	0.848052	0.806046	0.587517	0.607246	0.888137	0.66538
2732	ACar(20:2)	0.979303			452.394	144.13	0.0192146	0.013449	0.0339293	0.0129119	0.0138119	0.0136463	0.0247683	0.0519071	0.0503684	0.0178843	0.0223291	0.0818643	0.0158454	0.0108243	0.00881771	0.0447876	0.022696	0.0154588	0.0244421	0.0354644	0.026721	0.0356387	0.0430148	0.022731	0.0277175	0.0142537	0.0224297	0.0413275	0.00789227	0.0220192	0.0272173	0.00768567	0.0305226	0.398442	0.025452	0.0200609	0.0678032	0.255249	0.0161093	0.0212587	0.0155499	0.0561187	0.025108
8927	TAG(16:0/18:0/18:1)	0.978786			878.817	745.212	2.17939	1.0969	2.08486	3.83746	1.34382	1.25424	1.08191	1.34451	2.06197	2.64406	1.50897	5.05204	4.65398	2.2183	1.95637	3.9281	1.42343	3.32735	1.26597	1.13529	2.26995	2.15019	0.876557	1.04515	1.56215	1.44963	0.889372	1.30772	1.54904	3.79745	0.964201	1.65687	1.51439	1.81849	0.831285	2.43825	1.46738	1.26022	0.00680242	5.00939	1.44747	1.6521	2.01443
6251	SM(d14:0/22:1)	0.978691			731.595	408.548	0.171038	0.463659	0.395415	0.61205	0.467692	0.549651	0.514078	0.559913	0.629393	0.565573	0.497968	0.528994	0.487693	0.77916	0.464005	0.623466	0.643936	0.327913	0.527031	0.545613	0.517712	0.719396	0.384495	0.521106	0.517395	0.397481	0.411966	0.52926	0.598725	0.566208	0.525659	0.386133	1.12807	0.525525	0.419474	0.530408	1.00249	0.757062	0.644394	0.467361	0.398368	0.571549	0.542129
5272	SM(d14:0/18:2)	0.978636			673.501	303.682	0.00423815	0.0477542	0.0050642	0.0606617	0.0127848	0.0240349	0.012284	0.0552743	0.0444127	0.0113678	0.0734873	0.0166575	0.0285874	0.0447403	0.0753452	0.0860993	0.0256913	0.0278987	0.015354	0.0344293	0.0353084	0.0565336	0.025831	0.0341558	0.0281751	0.0410976	0.035914	0.0239153	0.0473019	0.0103604	0.0242526	0.0168326	0.0230761	0.0371751	0.0294903	0.0355567	0.0778619	0.0114813	0.0380647	0.0166773	0.032998	0.0323376	0.0324314
3324	LPC(18:2)	0.978541			520.34	79.8932	0.173735	0.878464	0.5121	0.717449	0.583435	1.07498	1.23739	1.59526	1.76989	1.63032	2.53234	0.419454	1.07133	2.06644	1.47199	2.99713	0.896955	0.828233	1.34291	2.49393	1.31469	1.31819	0.67594	0.820763	0.324809	0.817442	0.740635	1.79443	1.54038	1.0901	1.72497	1.28697	2.66778	1.28477	1.92274	0.982066	4.29356	1.64231	1.99791	0.312454	1.02382	1.4131	1.26931
5781	SM(d14:0/20:1)	0.978236			703.572	376.111	1.03869	2.15397	1.49805	1.66136	1.30999	1.67973	1.34081	1.39435	1.88027	1.03968	1.84579	1.07702	1.39443	2.06601	1.79354	1.72529	1.31932	1.67151	1.24799	2.2411	1.56895	2.58229	1.37725	1.94803	1.32823	1.91754	1.85699	0.959804	1.56216	2.10212	1.5404	1.11672	4.14111	1.42365	2.3201	1.62454	2.37481	1.07535	1.36045	0.877757	1.10061	1.7295	1.9974
5990	SM(d14:1/21:1)	0.977891			715.51	381.382	0.127899	0.436418	0.221966	0.414827	0.525666	0.441934	0.364965	0.412488	0.493944	0.347893	0.350239	0.174785	0.352473	0.433777	0.32155	0.556827	0.37689	0.281223	0.399231	0.38248	0.370874	0.655036	0.120111	0.520683	0.279353	0.688981	0.426175	0.304698	0.43263	0.427008	0.402088	0.355922	0.894854	0.466614	0.40796	0.295569	0.854354	0.378825	0.401517	0.299818	0.258426	0.443531	0.384887
9429	TAG(18:0/18:0/18:0)	0.977888			908.82	798.828	0.00810253	0.0209093	0.00352125	0.0230055	0.0297626	0.0139036	0.00694248	0.0236711	0.00105118	0.00692268	0.00354265	0.00119119	0.00169828	0.000735506	0.0477007	0.0118433	0.0145682	0.0263809	0.0239697	0.0333988	0.0151411	0.0175481	0.0107073	0.00344221	0.00176317	0.0048833	0.00246277	0.0172871	0.0250115	0.00158766	0.00523914	0.0189906	0.00729787	0.0020872	0.00513906	0.0513963	0.0268361	0.0178142	0.00189985	0.00988464	3.60705e-05	0.0115657	0.0133502
8651	PC(24:0/18:5)	0.976755			864.647	514.287	0.175887	0.532799	0.623358	0.437608	0.335797	0.433913	0.358623	0.807757	0.815089	0.547847	0.454002	0.724358	0.484938	0.587591	0.398025	0.50833	0.485042	0.438851	0.511003	0.592325	0.512657	0.755694	0.310192	0.643581	0.446159	0.540237	0.311729	0.513313	0.379745	0.576905	0.502013	0.585296	0.597792	1.1448	0.722579	0.500643	0.749351	0.332096	0.684323	0.296277	0.548165	0.557044	0.543869
6668	PC(18:4e/18:5)	0.976551			758.532	279.786	0.0858565	0.351402	0.0377214	0.284974	0.240574	0.253084	0.0880674	0.330281	0.15319	0.0162059	0.25853	0.0900609	0.299985	0.166467	0.237559	0.293263	0.146885	0.172085	0.0545291	0.255724	0.190822	0.224994	0.215497	0.174455	0.197626	0.272312	0.209363	0.0924309	0.418528	0.0558665	0.12829	0.11545	0.35322	0.172899	0.242425	0.18926	0.132012	0.0302545	0.208133	0.108818	0.236352	0.188909	0.201533
2414	ACar(18:3)	0.976033			422.326	75.2686	0.00134466	0.0223167	0.00825703	0.00882051	0.0169947	0.0195563	0.0559332	0.109794	0.563019	0.137559	0.175818	0.0779893	0.0671605	0.22436	0.0589334	0.0966942	0.0286851	0.131522	0.159665	0.219687	0.109205	0.0100091	0.00751107	0.138535	0.00974134	0.0333186	0.015271	0.112429	0.0919917	0.0786238	0.117939	0.0376926	0.0259591	0.226907	0.0728329	0.0128817	0.325795	0.414532	0.049176	0.0551354	0.101064	0.0968673	0.0929191
6221	SM(d14:0/22:2)	0.975875			729.59	408.551	1.89011	4.36365	4.1354	5.79736	4.54515	5.09834	5.37721	5.48731	6.01107	5.22833	4.9875	4.61761	4.79255	6.38234	4.72532	5.91012	5.82697	3.65829	5.80457	5.62658	5.01329	6.29284	3.70741	5.15071	4.6833	4.11657	4.49592	4.64404	5.81806	5.55128	4.94135	4.07942	11.0449	5.14558	4.12307	5.33048	8.66938	7.11752	5.8147	4.20983	4.06523	5.45008	5.16897
10115	TAG(20:4/20:4/20:4)	0.975799			968.77	662.171	0.0866192	0.291221	0.229415	0.145871	0.0937003	0.110565	0.235603	0.184054	0.667896	0.899413	0.982813	0.48425	0.271904	0.275239	0.101992	0.129081	0.0932561	0.149221	0.1435	0.139419	0.285752	0.301664	0.196124	0.461082	0.161422	0.130457	0.149706	0.333667	0.237917	0.292532	0.177407	0.281489	0.357496	0.50897	0.319383	0.233479	0.542628	0.400966	0.134711	0.0955922	0.132492	0.272459	0.250493
2991	LPE(18:0)	0.975688			482.361	117.471	0.0273046	0.0769111	0.0496255	0.048893	0.0907925	0.0844933	0.0988834	0.110118	0.0951131	0.0987193	0.175626	0.0308883	0.105425	0.122356	0.150529	0.152719	0.0918074	0.0979816	0.130679	0.179465	0.100917	0.125897	0.0455989	0.227668	0.0472351	0.0827773	0.0397286	0.135151	0.14477	0.066508	0.140733	0.0455139	0.191704	0.143359	0.14534	0.0859985	0.372917	0.105194	0.209488	0.0151043	0.0880875	0.122939	0.115907
6256	SM(d14:1/22:0)	0.975237			731.605	453.998	13.1471	23.068	15.5741	30.1805	22.7203	26.909	21.0288	19.8703	37.8685	29.5296	19.5693	17.9483	15.2071	31.5012	16.4606	17.7827	24.1411	17.5263	21.6702	21.1428	22.1423	39.89	21.2063	19.3277	22.6297	21.0792	25.6776	22.0311	24.7665	27.8475	17.0413	23.4678	39.6622	20.2224	16.7154	24.4616	45.2885	31.5425	25.7969	22.7875	16.5095	25.3976	22.5635
7955	PC(18:3/22:6)	0.975229			828.537	238.52	0.0183207	0.0665226	0.0066567	0.0606145	0.058819	0.0362811	0.0107091	0.0734407	0.0269979	0.0032306	0.0441811	0.0146332	0.0523509	0.029836	0.0275224	0.045566	0.0357353	0.025821	0.00559618	0.0370442	0.033994	0.0383472	0.0418595	0.0756336	0.0225175	0.0680492	0.0420168	0.0113438	0.0867762	0.0113406	0.0231789	0.0202941	0.0701982	0.0390055	0.0410314	0.0238356	0.0187443	0.00446574	0.0339689	0.00979581	0.0277924	0.0355098	0.0323855
8579	BMP(20:4/22:6)	0.975095			860.593	267.385	0.0114082	0.0345333	0.0010149	0.0350129	0.0239952	0.0219546	0.00460068	0.0725168	0.0140245	0.000192171	0.030717	0.00518777	0.0241948	0.015619	0.0176535	0.0242092	0.0235112	0.0196077	0.00162821	0.0210112	0.0201296	0.0234596	0.0164569	0.0114232	0.00976424	0.028503	0.0172861	0.00245729	0.089074	0.00319795	0.00783117	0.00438233	0.030102	0.0106218	0.00266189	0.0187717	0.00948531	0.000424807	0.0183546	0.0103754	0.00935667	0.0161995	0.01284
6024	SM(d14:0/21:1)	0.974579			717.582	383.058	0.040764	0.0218947	0.0045894	0.0185509	0.0383838	0.00936684	0.0110036	0.0145169	0.0192344	0.00960837	0.0207788	0.0146666	0.0132529	0.0164971	0.00845748	0.0238377	0.0106069	0.0108086	0.0166581	0.00751407	0.0165496	0.0427915	0.00554085	0.0145863	0.0121843	0.041166	0.0207314	0.00559364	0.0179536	0.0108457	0.00831225	0.00510688	0.0365232	0.0182101	0.00953533	0.0106348	0.0445403	0.0151147	0.0159743	0.0337097	0.00233235	0.0185694	0.010508
6228	PC(16:1/16:1)	0.97307			730.537	371.398	1.64993	6.41062	1.14731	6.11283	2.98591	4.22781	4.12337	5.24775	5.36555	3.31854	5.40286	2.33551	4.13575	7.55168	4.87765	7.75486	3.6086	3.5315	4.00428	6.20588	4.49991	10.1062	3.58005	3.83857	3.81288	6.11796	4.34733	4.18133	5.37306	5.15638	4.85422	5.98904	7.74589	5.98074	4.45574	4.39661	10.4548	7.70607	4.73849	3.83924	3.40028	5.50374	5.04729
6597	PC(17:2/17:2)	0.973054			754.536	360.655	0.566428	3.02446	0.943054	2.53912	1.83843	2.73337	3.18939	3.55748	4.48171	1.46331	2.4013	1.94722	2.50828	4.74984	3.05432	3.14953	2.25521	2.44672	1.64856	3.38651	2.59421	5.68778	2.28371	2.71833	2.68396	3.30872	2.12373	3.0107	3.83496	4.1492	2.71804	3.98043	6.20872	4.1207	2.48414	2.78653	5.44115	4.57131	2.57681	1.57359	1.75844	3.40105	2.79137
3094	PC(14:1e/2:0)	0.972104			494.324	75.6965	0.00235147	0.123194	0.0336824	0.069103	0.0544584	0.0781756	0.0881969	0.14958	0.177645	0.0543942	0.14855	0.05153	0.130186	0.138133	0.124457	0.224499	0.0836056	0.0933051	0.0912269	0.170641	0.104346	0.115612	0.0436186	0.0821409	0.044456	0.115305	0.0654995	0.129614	0.13339	0.0785981	0.134889	0.116212	0.182692	0.137536	0.124201	0.0836841	0.228362	0.0773137	0.137662	0.039325	0.081915	0.107601	0.110296
7519	PC(16:0/22:6)	0.971556			806.565	439.961	5.36244	15.5976	10.9675	24.7376	14.6451	30.2115	6.43816	14.6248	13.174	14.6023	13.0107	12.324	17.3926	15.5843	6.57976	9.4801	14.7632	14.2625	6.72807	6.56607	13.3526	13.5187	13.2742	5.83054	15.838	13.6861	14.5411	13.2867	7.48584	14.2919	6.58559	14.6573	17.0945	13.4706	14.7114	14.0605	6.35176	13.8742	15.3045	13.0515	7.64463	12.428	11.1993
6282	SM(d14:0/22:0)	0.969544			733.498	499.594	0.0147566	0.0226613	0.0333491	0.0339316	0.0223003	0.0166027	0.0181412	0.0345597	0.0240358	0.0182898	0.0419317	0.0574566	0.0411518	0.0159085	0.0392217	0.0371919	0.0217828	0.0337632	0.0215693	0.0132319	0.0280919	0.0422838	0.0191825	0.00324544	0.0194897	0.0337885	0.017684	0.00950079	0.019271	0.0250165	0.0102583	0.00988514	0.0277079	0.00737154	0.0132918	0.0161249	0.439336	0.00687183	0.0126871	0.0352366	0.0224508	0.0395342	0.02025
6040	PC(14:0e/18:1)	0.969083			718.592	426.416	0.926906	1.77726	1.51233	1.98481	1.95807	2.08807	1.43592	1.72901	2.45757	1.51321	1.64491	1.29305	1.38509	1.8066	1.43919	1.99266	1.70702	1.28498	1.52374	1.46607	1.64632	2.80503	1.50834	1.70852	1.47619	2.25389	1.8404	1.33963	1.48036	2.01239	1.59472	1.57775	2.9287	1.7587	1.86029	1.61614	2.94666	1.4417	1.71666	1.12206	1.10415	1.80461	1.57967
8654	PC(16:1/26:4)	0.968973			864.647	498.762	0.169084	0.402808	0.604649	0.655791	0.371316	0.462407	0.475678	0.53621	0.0140785	0.510734	0.765034	0.25205	0.445795	0.724792	0.551502	0.584307	0.58177	0.342473	0.836219	0.662081	0.497439	0.644091	0.280118	0.323648	0.312303	0.595918	0.38903	0.555497	0.45385	0.549741	0.833907	0.484556	0.964128	1.03509	0.515187	0.410512	1.2655	0.816651	0.454088	0.248887	0.00575227	0.556923	0.637518
8167	PC(20:2/20:2)	0.968915			838.622	468.449	0.240271	1.00033	0.757352	0.488745	0.395322	0.88718	0.478838	0.658684	0.924627	0.598995	0.573017	0.86875	0.45883	0.741645	0.815072	0.510309	0.436889	0.445323	0.531724	0.553047	0.618247	0.629799	0.38884	0.71351	0.349045	0.708705	0.479141	0.597783	0.534858	0.658579	0.536036	0.659737	1.01692	1.31544	1.4494	0.925033	0.681249	0.646637	0.619321	0.36152	0.545454	0.69085	0.604501
8813	TAG(16:0/18:2/18:2)	0.968793			872.77	708.296	0.722855	1.28928	1.83001	2.86245	0.981085	1.02501	1.71905	1.0127	2.03073	2.79781	1.6113	3.38722	2.08441	1.26984	0.890128	1.50278	0.773768	2.1737	0.931991	0.840091	1.58681	1.82073	0.979861	1.19698	1.87639	1.0499	0.750678	1.76614	1.87009	4.03707	1.1366	2.40742	1.85572	1.98117	0.796073	1.87269	1.64083	1.83572	0.83742	2.35465	1.02082	1.65435	1.66359
3113	LPC(16:0)	0.968562			496.34	96.7517	1.36479	9.14396	4.945	5.48541	5.15633	9.25953	8.73225	12.958	14.6667	8.48514	14.4644	5.53036	9.86154	12.0273	11.7728	21.6495	9.77114	7.71205	10.2319	23.5345	10.3376	8.58085	5.33917	7.23441	3.84063	11.8016	4.87969	10.6947	12.5041	7.66757	12.3914	10.9932	17.659	11.3419	12.1534	6.6093	21.4909	7.65126	13.3785	2.9102	8.85639	9.89891	9.55334
8427	TAG(16:0/16:0/18:0)	0.967763			852.799	744.327	1.12502	1.10434	1.26206	4.56452	1.44556	1.24663	1.51118	1.08024	1.63213	1.91106	1.16744	4.26564	2.7937	1.88874	1.19031	2.25594	1.00106	1.9509	1.01553	0.96523	1.76886	1.9965	0.81864	1.15371	1.3432	1.05374	0.953443	1.42182	2.02346	3.35375	0.862621	2.10794	2.10767	1.58734	0.618814	2.16436	1.5049	1.76308	1.42989	5.31489	0.999569	1.72897	1.65422
8859	TAG(16:0/18:1/18:2)	0.967352			874.777	696.526	1.22012	0.685221	1.3901	2.31586	0.609721	0.743403	0.742946	0.91907	1.87625	5.12795	1.62317	3.59126	2.8245	1.86111	1.21633	2.91702	1.46656	3.8157	1.19186	0.998435	1.85683	1.2159	0.560702	0.466288	0.950369	0.989096	0.491297	0.752742	1.12495	1.7782	0.708501	1.03147	0.945855	1.16337	0.519409	1.22186	0.0291108	1.15821	1.58578	4.91944	1.34404	1.14783	1.57944
8353	TAG(16:0/16:1/18:1)	0.967014			848.768	712.018	5.1968	3.00445	4.48498	10.7245	2.99255	2.81696	3.48188	4.16878	7.35107	12.8622	5.4623	15.8315	19.3854	9.35324	5.68846	12.9583	5.32389	16.8811	4.26131	3.7845	7.80071	4.89049	2.75489	1.87957	4.38386	4.36585	1.92885	3.38378	4.60045	8.87522	2.50958	5.18313	4.41491	4.64528	2.20636	5.75394	4.14371	4.79992	7.75061	23.2508	4.92609	5.33237	6.24584
8578	PC(16:3/26:4)	0.966158			860.615	451.975	0.0507448	0.24268	0.373102	0.209406	0.198031	0.2745	0.30097	0.358931	0.449785	0.470571	0.492847	0.2745	0.291524	0.444903	0.391221	0.321699	0.292759	0.23532	0.287228	0.45202	0.320637	0.343576	0.226564	0.335945	0.229026	0.342258	0.246337	0.350784	0.245944	0.310072	0.424157	0.312827	0.483597	0.938543	0.635625	0.241692	0.503484	0.398474	0.360287	0.179486	0.332409	0.372054	0.355628
6673	PC(17:1/17:1)	0.965236			758.567	424.374	185.244	371.902	283.828	404.375	378.777	362.434	345.265	331.093	356.958	425.33	384.284	262.82	316.988	446.004	341.597	460.137	323.066	334.082	367.641	418.14	354.998	499.073	306.604	353.205	325.85	329.012	385.064	353.827	440.209	380.883	353.925	366.99	581.193	378.171	304.732	353.049	508.848	511.779	390.717	290.39	372.221	389.287	378.655
7605	PC(19:2/19:2)	0.964539			810.588	418.572	5.63021	15.3066	14.1404	12.0182	12.8246	14.19	14.9667	16.2827	25.3451	12.7938	13.8287	13.0432	15.25	15.5242	13.6948	13.9051	11.5994	11.2932	14.0344	15.3911	14.0531	12.7322	14.0041	18.17	11.0571	15.2912	12.2559	17.2677	12.8276	15.6073	18.2451	17.4177	29.0695	20.8589	14.9681	11.1638	17.7087	12.3751	13.2144	8.79297	13.3024	15.3165	13.5381
7151	PC(18:1/18:1)	0.964328			786.591	437.96	3.90673	21.0824	18.722	17.5429	26.0302	24.235	27.2413	24.1831	28.4271	29.4674	28.8741	13.2462	24.8453	31.2544	28.0791	19.1537	26.9065	23.5141	16.8892	31.8655	23.2733	39.2199	23.4529	16.567	28.895	28.8132	25.725	34.2657	24.1056	32.054	27.3167	20.8505	37.4514	31.6242	30.5968	30.72	24.7102	27.5679	34.4759	17.731	32.9419	28.4542	29.0995
7560	PC(14:1/24:4)	0.964238			808.573	378.67	3.35093	15.6109	15.1483	17.556	13.7279	19.7951	21.0626	21.5651	29.051	24.5094	17.9425	24.253	14.2153	28.7596	15.7074	21.3729	13.1788	22.3407	18.566	27.9796	19.2846	25.4928	18.267	24.8427	12.9131	15.0492	16.5274	23.9809	19.1555	22.4653	19.2663	26.2654	42.7513	47.9349	23.4822	14.1582	37.0143	28.6367	18.9583	7.6878	14.9719	22.9911	18.2858
5095	DAG(18:1/20:3)	0.964201			662.571	534.662	9.26003	26.7545	19.3617	33.9014	34.3922	21.3302	15.6145	36.2455	28.5798	29.5175	48.112	34.036	34.5224	37.5519	37.8147	31.9875	23.9038	35.9411	21.7659	30.0029	29.5298	66.2964	26.4182	22.3625	18.0269	27.4142	16.5638	16.1694	42.1922	17.6663	28.1587	14.4124	25.9947	8.82004	17.7102	16.3325	16.1244	16.2092	39.3973	23.7763	31.8216	24.5934	25.8818
8989	PC(22:5/22:5)	0.963539			882.6	389.344	0.136841	0.547219	0.443009	0.212762	0.316831	0.348341	0.544927	0.613409	0.923292	0.487429	0.592575	0.553187	0.553657	0.657984	0.685565	0.373541	0.422581	0.666006	0.380087	0.520568	0.49899	0.485029	0.377949	0.6396	0.329248	0.542398	0.319648	0.639144	0.475865	0.536579	0.685422	0.685367	1.28443	1.04843	0.977264	0.47638	0.61024	0.599302	0.695778	0.319261	0.377382	0.605236	0.504814
7086	PC(18:2/18:2)	0.963249			782.559	367.539	0.378494	2.46678	1.20872	1.58057	1.40463	1.57198	1.97091	2.05825	3.69008	1.64851	1.15494	1.53955	1.73478	3.00743	0.954674	2.46979	1.42244	1.56417	1.50891	2.35557	1.78456	2.96295	1.2826	1.27143	1.57718	2.05528	1.31728	2.52514	2.75694	1.92177	1.52458	2.71469	3.45239	3.20249	1.74742	1.69079	3.05472	2.5491	2.06587	0.897087	0.957674	2.07637	1.16741
3823	PC(10:0/10:0)	0.963032			566.381	111.847	0.0146911	0.0363772	0.00481473	0.022744	0.0426325	0.0222969	0.0207699	0.0402581	0.0386109	0.0111281	0.0470157	0.0113878	0.0269745	0.0289698	0.0270093	0.0233687	0.0199632	0.0258099	0.014313	0.0289794	0.0254057	0.0472823	0.0329588	0.0864694	0.0238164	0.0388358	0.0375353	0.0263615	0.0512216	0.0139512	0.0390407	0.01975	0.0390682	0.0517895	0.0537891	0.024733	0.049865	0.0167933	0.0499496	0.00982358	0.032705	0.037287	0.0297786
2475	ACar(18:1)	0.962938			426.279	162.887	0.0119253	0.0158422	0.0213499	0.0088176	0.023461	0.00162557	0.00193874	0.0142832	0.00254269	0.005173	0.0134465	0.0128921	0.0139172	0.00713489	0.0270741	0.0148906	0.0032818	0.0149195	0.0170492	0.0041698	0.0117867	0.016437	0.0165358	0.0200149	0.0127389	0.0268079	0.00851833	0.002408	0.0278784	0.00630736	0.0109392	0.00720722	0.0152557	0.000869336	0.0259053	0.00467494	0.00704498	0.0119926	0.0106733	0.00977999	0.0143398	0.0128164	0.0201991
8128	PC(18:0/22:5)	0.962805			836.616	468.493	1.58088	3.63609	4.84343	3.32401	2.94918	3.50825	3.30993	4.41476	5.71166	3.92767	3.78832	7.90336	3.29458	4.69431	3.57149	3.47399	3.15462	3.13461	3.80171	3.87646	3.89497	4.16656	2.70349	4.16566	2.61583	4.68387	2.92889	4.09937	3.54875	4.24147	4.01543	4.14301	6.54526	8.51889	4.83273	3.24741	4.57032	3.96379	3.75816	2.47652	3.48139	4.13534	3.84913
7038	PC(14:0/22:5)	0.962774			780.516	337.42	0.0146235	0.0480314	0.00767091	0.0593774	0.0319809	0.0320824	0.0114875	0.0462456	0.0174798	0.0125594	0.0467985	0.0127253	0.0342469	0.0209393	0.038431	0.0568134	0.0181353	0.0143966	0.0109908	0.0454248	0.029022	0.0292026	0.0313256	0.0261567	0.0189767	0.0366903	0.0287534	0.0100272	0.043439	0.00694071	0.0213565	0.0191932	0.0294225	0.0341359	0.0271389	0.0187574	0.0249707	0.00825958	0.0238357	0.0113493	0.0261785	0.0238055	0.0229036
9695	TAG(18:0/18:1/20:3)	0.962379			928.83	716.471	1.63028	1.05367	1.35329	1.98313	1.52138	0.766211	0.780413	0.78082	1.31736	2.48888	1.49972	1.58958	2.11183	1.42821	0.90545	1.46991	0.934854	1.68233	0.961761	0.834196	1.35466	1.67137	0.982192	0.651493	1.27293	0.914861	0.6996	1.7881	1.06259	1.895	0.602241	0.922214	1.25405	1.33657	0.770353	1.4004	1.14974	1.27194	0.919559	2.03178	1.15588	1.18764	1.15339
8952	PC(22:5/22:6)	0.962212			880.569	389.332	0.0126965	0.0559174	0.0553732	0.0331264	0.0461902	0.0501622	0.0869291	0.113356	0.117386	0.0535574	0.0953137	0.0352456	0.108823	0.0412269	0.0987223	0.012594	0.116684	0.137074	0.0401294	0.112075	0.0711292	0.00342784	0.0405048	0.0244836	0.0252719	0.0397896	0.035531	0.0513881	0.046207	0.0740195	0.130516	0.0314083	0.144973	0.119401	0.141126	0.0265896	0.0504413	0.0344128	0.0300626	0.0367836	0.0160337	0.0551186	0.0460639
8535	PC(16:4/26:4)	0.962104			858.584	267.094	0.0545572	0.163393	0.0224631	0.157882	0.18185	0.131949	0.0604633	0.152701	0.0845558	0.0217905	0.157514	0.0545155	0.101384	0.0792401	0.093803	0.112945	0.0879503	0.102424	0.0232793	0.100615	0.0972638	0.10003	0.0821548	0.0870583	0.0645412	0.23239	0.0936937	0.0353743	0.209345	0.0324514	0.0596803	0.0448085	0.140294	0.120264	0.0949575	0.0869453	0.0760721	0.0155314	0.109268	0.0561848	0.0928465	0.0916946	0.0788556
8034	PC(16:3/24:4)	0.961525			832.575	366.388	0.364907	3.54275	2.27081	2.91928	2.13843	3.2175	3.33632	4.38466	7.62691	5.36107	4.16895	2.08515	2.0194	5.6669	2.44784	3.36582	2.13809	2.43208	3.14547	5.5171	3.40747	4.16037	2.80769	4.75637	2.2519	3.18505	2.95242	6.03034	3.66155	4.55038	4.96161	5.19892	6.00762	8.81241	4.39379	2.87095	9.13981	7.48633	3.02144	1.15277	2.53833	4.497	3.81001
3248	LPC(17:0)	0.96151			510.354	113.92	0.0115398	0.0962358	0.0550237	0.0525164	0.0812255	0.119222	0.0913013	0.1546	0.172642	0.0936604	0.126623	0.0538452	0.103451	0.0637109	0.126284	0.322149	0.0979502	0.0633919	0.129107	0.167802	0.109114	0.144721	0.058142	0.0943354	0.0431447	0.142983	0.0720992	0.0820994	0.0895497	0.0908082	0.0997771	0.0912841	0.236537	0.0861166	0.134859	0.0659344	0.300721	0.064526	0.165324	0.0294174	0.0783995	0.108539	0.102011
5603	CE(20:3)	0.961057			692.633	716.722	0.299675	0.395311	0.300822	0.77712	0.238532	0.10362	0.226204	0.600273	0.175609	0.305368	0.222464	0.257631	0.607917	0.297143	0.932198	0.597098	0.265795	0.833295	0.231469	0.246759	0.395715	0.283741	0.135467	0.082583	0.164407	0.420647	0.130912	0.239843	0.320703	0.803716	0.14758	1.22157	0.523562	0.138233	0.445623	0.698002	0.754604	0.281253	0.33809	2.944	0.199115	0.513683	0.401061
8397	TAG(16:0/16:0/18:1)	0.960211			850.742	755.225	0.00274067	0.0166709	3.40527e-05	0.0061836	0.00881798	0.00240142	0.00190496	0.0132833	0.00442702	0.0056034	3.78662e-05	3.53388e-05	3.97844e-05	0.000365029	0.0145959	0.00576923	0.00247414	0.0112141	0.00399945	0.00390852	0.00522533	0.0117662	0.00201933	0.00349367	0.000238453	0.00250869	0.000477769	0.00560338	0.0149693	0.000323031	3.71217e-05	0.0144484	0.00227251	0.000244184	0.000997047	0.0247209	0.0145838	0.00284088	0.00050701	0.0129444	0.00286884	0.00589325	0.00498668
7475	PC(16:1/22:6)	0.960118			804.553	341.819	0.20566	1.02998	1.73645	0.703406	0.66844	0.633415	0.94292	1.20779	2.11377	0.875449	0.748027	0.46966	0.553832	1.55434	1.18722	3.49911	0.412778	1.97968	0.646293	1.20228	1.11853	3.61431	0.99009	0.952963	0.500811	0.767948	0.522228	1.27011	1.13897	1.21428	0.650481	1.15863	1.46827	1.16573	1.21177	0.747229	1.50652	1.42619	0.867267	0.209511	2.1875	1.17854	0.905232
8125	PC(14:1/26:4)	0.959896			836.61	451.969	0.047058	3.26767	3.1446	2.71783	2.39702	2.48334	2.92145	3.49825	3.79878	3.79516	4.18514	0.0904655	4.05479	5.23516	3.3555	3.18371	3.39965	2.9042	3.34789	3.16706	3.04974	4.2932	2.26087	3.14286	2.83935	3.89594	2.66358	3.82675	3.49116	3.56697	3.91526	3.48106	6.39345	5.06513	4.86901	3.51942	5.22262	5.40329	5.10277	0.966192	3.32869	3.86238	3.47517
8460	PC(20:4/22:6)	0.95953			854.567	351.592	0.876129	15.5441	9.3577	4.29366	7.6718	9.72793	12.8996	9.50553	37.2901	23.5142	22.1763	9.68821	8.46199	25.0162	11.8578	9.39247	9.67346	9.79022	10.6288	22.7275	13.5047	16.3346	13.1989	28.4334	9.77271	12.5278	12.8211	22.6894	14.9921	14.3242	24.9933	22.9012	21.7736	50.5107	24.6787	14.5773	35.7222	33.0044	16.1323	3.50048	11.4661	20.2177	16.0109
6294	PC(16:0/16:0)	0.959401			734.57	458.576	112.364	322.09	290.74	315.344	257.553	272.145	330.984	371.501	302.976	273.683	327.344	316.441	352.188	384.732	361.436	329.538	299.009	282.512	329.989	357.85	309.521	369.35	270.053	383.429	277.758	286.012	265.344	329.486	414.939	295.064	417.602	316.747	650.645	390.054	352.478	301.431	373.488	362.354	327.324	217.567	358.602	347.986	309.106
9737	TAG(16:0/20:1/20:1)	0.958623			932.854	732.588	0.172368	0.100422	0.138319	0.228848	0.0778488	0.109152	0.0699197	0.107835	0.148683	0.406993	0.188335	0.286907	0.34009	0.246073	0.206867	0.310506	0.171782	0.360497	0.136949	0.124305	0.196635	0.205946	0.0710229	0.0704592	0.142132	0.145699	0.0740528	0.108581	0.158595	0.109024	0.0720104	0.0778648	0.121042	0.10855	0.0782852	0.144849	0.0900508	0.1455	0.198928	0.402684	0.23116	0.137822	0.207722
8611	PC(16:2/26:4)	0.958477			862.621	502.118	0.0773064	0.110284	0.225813	0.160302	0.100226	0.172451	0.140931	0.21854	0.173964	0.19362	0.208636	0.106525	0.170418	0.200149	0.0962872	0.143623	0.215294	0.145665	0.248198	0.119747	0.161399	0.194893	0.0881594	0.151376	0.103127	0.257973	0.11649	0.189143	0.170189	0.288193	0.19398	0.147277	0.363045	0.296841	0.218263	0.131018	0.239672	0.212979	0.174415	0.126633	0.0889295	0.18763	0.138304
6005	CE(22:5)	0.958291			716.632	710.956	0.27038	0.360881	0.328484	0.639924	0.245059	0.209126	0.199249	0.779049	0.148961	0.23236	0.188175	0.147483	0.418852	0.147887	1.11883	0.444938	0.301427	0.774821	0.252027	0.319038	0.376347	0.266978	0.155972	0.146358	0.112516	0.280942	0.0985268	0.233559	0.351778	0.836937	0.180272	0.568986	0.574122	0.144601	0.283255	0.688869	0.960514	0.220185	0.236452	0.90577	0.148232	0.369741	0.360367
8922	PC(22:6/22:6)	0.958076			878.566	373.996	0.00256368	0.507287	0.192644	0.0113963	0.216597	0.153898	0.383347	0.432138	0.512936	0.331313	0.512302	0.248824	0.423867	0.605077	0.398064	0.0076218	0.29471	0.00732837	0.218347	0.00980702	0.273503	0.350487	0.288646	0.460631	0.304838	0.315728	0.232051	0.458375	0.301581	0.277585	0.467604	0.34075	0.621874	0.627544	0.851286	0.390331	0.427881	0.547297	0.58492	0.10866	0.394094	0.417608	0.359271
8079	PC(18:0/22:6)	0.958034			834.6	451.515	5.63632	6.73081	6.05287	4.85389	7.16476	6.83669	7.90245	9.11337	12.9047	21.7575	12.3515	10.5735	12.5618	13.8882	12.6647	8.46112	14.1497	7.73089	7.23751	7.94778	9.82601	17.5259	6.31685	21.3955	7.80794	8.16104	7.39559	8.50342	13.1791	13.2681	11.8017	9.0704	15.5838	16.2802	11.9935	11.4122	26.4635	21.2089	20.0395	6.64638	11.7464	13.29	9.60207
6637	PC(12:0/22:3)	0.957404			756.543	359.515	0.0708426	0.430599	0.163638	0.3488	0.255883	0.361047	0.426941	0.466817	0.574364	0.236079	0.385533	0.269269	0.340119	0.640407	0.39921	0.408628	0.294486	0.30049	0.219987	0.468949	0.353104	0.774441	0.302931	0.367672	0.358257	0.463587	0.295584	0.440953	0.562727	0.519562	0.428356	0.53989	0.793819	0.582469	0.341748	0.389824	0.734829	0.636397	0.348688	0.207888	0.270085	0.467985	0.412358
5193	CE(18:1)	0.956488			668.625	713.293	0.555335	0.229762	0.761126	0.912767	0.267704	0.192753	0.326499	0.358315	0.555266	1.0997	0.519848	0.766826	1.56428	0.794423	0.551995	1.08802	0.485573	0.971041	0.511288	0.296557	0.640454	0.410769	0.192031	0.119809	0.179087	0.639069	0.252238	0.228996	0.388664	0.947601	0.286405	0.854173	0.430291	0.271522	0.39116	0.721657	0.31745	0.548068	0.674977	2.20694	0.369244	0.521507	0.635104
7292	PC(13:1/24:4)	0.955827			794.588	357.049	0.00867809	0.0763495	0.0359482	0.0826197	0.0752027	0.0729576	0.0569984	0.0782913	0.168534	0.0944913	0.0663222	0.037212	0.0540733	0.0937752	0.0684702	0.101892	0.053024	0.0509128	0.0700584	0.163486	0.0754649	0.159909	0.0655243	0.115849	0.0863034	0.0919201	0.0710236	0.128194	0.132213	0.0716316	0.099163	0.106238	0.0899815	0.154707	0.0675172	0.0720211	0.137559	0.120132	0.0792121	0.0216193	0.0595046	0.0965112	0.0783189
6897	PC(9:0/26:2)	0.955598			772.584	451.862	1.36306	5.25699	3.28471	4.98523	6.53472	6.09151	3.80035	4.25459	5.04577	6.41203	4.90975	2.98948	3.50273	5.92484	4.80955	9.86091	3.17929	2.71547	5.11632	4.12486	4.70811	13.5751	3.55718	5.36123	3.61449	5.96652	6.24187	3.18527	4.72786	4.75219	4.17956	4.64733	7.3841	4.07732	4.26829	4.74874	9.94659	6.55597	6.09123	2.96731	4.24842	5.50483	4.98228
3348	LPC(18:1)	0.955331			522.355	101.425	0.269391	1.1815	0.703201	0.716777	0.655371	1.14689	1.08529	1.81549	1.87844	1.08799	2.11372	0.614476	1.47674	1.76495	1.75484	2.71485	1.2629	0.970364	1.41232	2.82013	1.37228	1.20951	0.686335	1.03559	0.477966	1.21711	0.752882	1.67563	1.47684	1.07822	1.75	1.14092	2.18802	1.78297	1.8178	0.893442	3.63316	1.09276	1.97143	0.318692	1.11039	1.36548	1.35475
7252	PC(15:0/22:6)	0.955006			792.543	404.333	0.333798	2.3012	2.25096	1.02602	1.20276	1.68299	1.90863	2.88807	3.78902	2.88848	2.76399	3.61021	2.04853	2.8134	2.91126	2.68597	1.81243	1.30533	2.88123	2.84328	2.29738	2.73057	2.02228	3.06655	2.05575	1.81918	1.78343	2.5427	2.47809	1.46535	3.58344	2.47967	2.19459	3.92424	2.96114	2.50453	3.23465	2.87466	2.97467	0.829899	2.64407	2.50847	2.42092
5566	CE(20:4)	0.954737			690.618	702.929	0.946539	0.535387	1.35421	2.09501	0.528197	0.514812	0.541795	1.12341	1.10775	1.23749	0.803754	1.77016	1.81697	0.783704	1.45506	2.0492	1.09118	2.54128	0.980935	0.624281	1.19506	0.660599	0.397244	0.366442	0.442377	1.1457	0.471312	0.565874	0.536762	2.23385	0.572195	2.13355	1.25132	0.641947	0.687938	1.35536	1.38393	0.747171	0.944716	5.53713	0.632865	1.13541	1.19212
6472	PC(7:0/26:1)	0.954298			746.569	441.545	1.07098	4.13919	1.84378	2.67894	2.11701	2.23322	1.68605	2.88008	3.97115	1.72019	2.89043	2.49983	2.66238	3.07418	2.2615	4.6749	2.1218	1.60505	2.50212	2.29153	2.54622	5.56129	1.90452	3.5314	1.94612	5.92876	2.42871	1.95519	1.94125	2.86693	2.49595	2.92542	4.36911	3.1726	2.52545	2.25897	3.41937	2.31263	2.65679	1.50093	2.44885	2.90751	2.90135
6259	PC(6:0/26:1)	0.953742			732.554	415.433	19.6163	41.1294	21.4998	38.9988	22.6144	21.1649	26.0483	32.0208	34.9266	17.8933	30.8571	27.8319	19.6133	36.5518	36.3627	43.0556	27.8881	26.9123	29.28	33.6429	29.3954	38.6176	20.3222	28.6449	31.0008	40.6683	26.8605	26.8535	29.5547	28.2624	39.4703	31.5419	41.7025	36.6793	26.591	27.9804	36.7124	30.7624	27.1127	28.9507	32.4624	31.5375	31.2648
5348	PC(14:0/14:0)	0.952837			678.507	349.655	0.0540332	0.389516	0.0698106	0.252696	0.112137	0.215844	0.340755	0.429018	0.232797	0.113325	0.23318	0.167922	0.410181	0.403425	0.323057	0.534668	0.197657	0.190319	0.201858	0.324578	0.259839	0.737279	0.19118	0.214122	0.327041	1.05076	0.291773	0.204946	0.32288	0.302656	0.270724	0.436187	0.627446	0.305356	0.212485	0.269755	0.670421	0.36624	0.291896	0.280465	0.141009	0.375731	0.32213
4657	DAG(18:2/18:2)	0.952306			634.539	495.641	3.36861	14.0144	12.2836	15.7451	16.7812	14.5793	12.1889	20.8282	19.6994	16.8052	19.0354	18.1339	16.158	20.5392	20.6552	17.52	13.936	15.3114	14.2537	24.487	16.3162	25.3248	13.206	11.4207	13.0193	15.6878	9.18189	11.1251	22.206	10.0164	17.2089	10.9904	18.6997	8.28566	12.2366	9.59471	9.70504	10.5896	14.5645	9.87097	15.557	13.4245	15.0115
6436	PC(7:0/26:2)	0.95123			744.552	399.042	0.852907	2.97223	1.12253	2.21085	2.19056	2.29934	2.00024	2.02321	1.99379	2.18362	1.76511	1.623	2.05855	2.22685	2.2044	3.92477	1.56309	1.36105	2.10131	1.82609	2.02517	5.03257	1.54206	2.04405	1.74345	3.15183	2.33193	1.53455	2.06435	2.49619	1.60959	2.17014	3.6435	1.96447	1.64883	2.28676	3.95552	2.75915	2.11265	1.73288	1.82608	2.38253	2.03492
2225	ACar(16:0)	0.950883			400.341	130.069	0.0664409	0.111409	0.0846019	0.122174	0.109389	0.196074	0.215827	0.25283	0.96311	0.243179	0.389734	0.284763	0.210105	0.310315	0.103226	0.355785	0.113066	0.185265	0.354838	0.369972	0.252105	0.168387	0.1169	0.695515	0.108708	0.19197	0.0786803	0.56979	0.256141	0.345704	0.692433	0.160746	0.00835947	1.1883	0.183537	0.0991781	0.647879	0.677527	0.128893	0.160211	0.160957	0.331991	0.315449
5982	CE(22:6)	0.950289			714.616	692.255	0.413571	0.403829	0.549873	0.548267	0.236731	0.155291	0.250111	0.565587	0.484965	0.461318	0.273896	1.0292	0.557088	0.440854	0.697311	0.736607	0.491976	0.711892	0.286089	0.211829	0.475314	0.46599	0.213035	0.268611	0.219732	0.416801	0.275748	0.348435	0.398356	1.45817	0.261128	2.73041	0.672236	0.296072	0.390215	1.06568	0.780676	0.489344	0.588576	3.59298	0.448025	0.769011	0.606404
6677	PC(8:0/26:2)	0.949843			758.568	481.763	0.504711	0.817384	0.74472	1.17056	1.15199	0.976028	0.863197	0.773815	10.2153	2.35525	1.28531	0.64132	0.880382	1.133	1.08984	1.46199	0.823229	1.01172	17.1535	2.49401	2.37736	1.20356	0.842806	0.724021	0.754037	0.863412	24.2006	12.0564	3.9158	0.92441	0.931938	0.980578	2.13776	1.02606	0.869774	0.768804	1.6012	19.1311	1.09485	0.778461	0.725545	3.77655	0.873754
7607	PC(12:0/26:4)	0.94953			810.599	465.315	69.6612	134.666	119.58	150.705	138.659	171.739	152.449	144.045	223.196	174.914	160.875	131.493	185.946	182.542	121.592	185.459	149.978	144.947	127.068	145.937	150.773	164.278	120.654	172.182	115.417	163.71	145.125	152.907	167.141	187.177	148.65	167.13	307.871	185.101	206.482	138.225	207.458	170.938	153.915	116.3	113.081	165.187	139.499
6815	PC(9:0/26:4)	0.949199			768.552	387.849	3.00665	5.84376	3.61658	4.35359	5.91244	8.42001	6.3106	6.87128	12.4019	4.83038	7.77007	5.87209	5.76555	4.49095	4.96249	6.69413	8.03894	6.90148	4.49876	4.98653	6.07741	8.15957	4.47175	6.76089	4.90443	8.08427	4.43577	4.16921	5.2505	11.2441	5.42068	13.6087	13.9256	13.9548	4.24957	4.98514	7.62973	3.87711	7.80957	6.36765	3.73157	7.15203	4.93587
3373	LPC(18:0)	0.94832			524.371	138.126	0.695924	2.44131	1.79266	2.04033	1.69738	2.61647	3.0353	3.99311	4.62068	3.2085	6.0193	1.68064	2.83561	4.36157	3.57252	6.11424	3.68841	3.03943	3.69567	5.69248	3.34208	3.39369	1.52009	3.02623	1.3609	3.35262	1.94493	3.60086	3.63723	2.88076	3.04951	3.01555	6.86778	3.1222	3.84919	2.26175	8.86185	2.65578	4.75833	1.01157	2.68872	3.34298	3.14135
7809	PC(17:0/22:6)	0.948189			820.584	427.284	0.027291	0.193442	0.187874	0.0503453	0.188958	0.208391	0.193969	0.28875	0.447217	0.349205	0.220748	0.339621	0.271173	0.280373	0.247833	0.35684	0.19928	0.170395	0.208169	0.155161	0.229252	0.390478	0.184713	0.392491	0.141075	0.279608	0.184849	0.151508	0.149374	0.228967	0.311898	0.213456	0.466571	0.425736	0.343395	0.275485	0.504477	0.24538	0.405472	0.172446	0.192453	0.282992	0.245269
9974	TAG(18:0/18:0/21:1)	0.947662			953.832	710.531	0.290541	0.380708	0.430861	0.532582	0.252238	0.269645	0.300747	0.202762	0.479173	0.711143	0.631489	0.344378	0.370461	0.354026	0.209205	0.237167	0.201042	0.318403	0.230472	0.215032	0.348104	0.466496	0.291494	0.394523	0.365282	0.243327	0.265088	0.472172	0.380069	0.702694	0.189548	0.349853	0.696326	0.495913	0.254038	0.363397	0.473112	0.419473	0.182931	0.314594	0.23779	0.377906	0.333601
7088	PC(10:0/26:4)	0.947589			782.568	446.942	1.54799	5.21921	3.23975	4.54131	5.08117	6.82267	5.29083	5.3275	7.3118	6.10274	5.41934	4.72226	4.40317	5.98778	4.85024	5.23019	33.9399	4.49426	4.58484	6.48418	6.53006	5.61873	4.5585	6.20071	4.51531	4.99796	4.37197	6.00178	6.20818	5.79032	5.87681	6.88821	9.44414	6.38669	4.5171	4.70031	5.9849	6.00002	4.37695	3.31104	5.06348	5.54066	4.90037
6032	CE(22:4)	0.946592			718.647	703.195	0.0985954	0.107662	0.150115	0.222006	0.068411	0.0626158	0.0618025	0.113427	0.111837	0.0934162	0.07226	0.135936	0.12873	0.0735127	0.141022	0.165911	0.106431	0.294992	0.0986191	0.041425	0.117436	0.0659316	0.0441704	0.0468604	0.0416044	0.128247	0.0548269	0.0633123	0.0561456	0.177644	0.0651414	0.22415	0.208999	0.0629602	0.0753537	0.210909	0.118542	0.0816061	0.0903749	0.316374	0.0700108	0.110158	0.165013
7374	PC(15:0/22:3)	0.946559			798.599	461.911	0.0802241	0.658239	0.322603	0.497272	0.768832	0.363142	0.531271	0.393409	0.456004	0.585318	0.5024	0.359488	0.643004	0.895589	0.515443	0.563013	0.470625	0.436674	0.504558	0.448398	0.499775	4.26732	0.407746	0.612701	0.635657	1.34136	0.718295	0.593905	0.947025	0.54623	0.403868	0.422336	1.22914	0.479642	0.753785	0.625343	1.66514	0.752884	0.859193	0.388922	0.6489	0.91497	0.611467
10291	TAG(20:2/20:2/20:2)	0.946224			985.816	739.828	0.271345	0.18982	0.337225	0.188356	0.109965	0.145316	0.097448	0.145307	0.184446	0.418697	0.22239	0.213829	0.201427	0.182885	0.111704	0.104047	0.111939	0.14653	0.165366	0.112113	0.183008	0.284512	0.0945274	0.125732	0.263936	0.102323	0.122941	0.31022	0.184534	0.374296	0.0996002	0.174393	0.281692	0.310179	0.171481	0.269112	0.199442	0.210382	0.113621	0.117415	0.121696	0.196602	0.176266
10241	TAG(20:3/20:3/20:3)	0.946224			979.772	706.681	0.216738	0.858804	0.645452	0.455979	0.398653	0.408733	0.61942	0.477386	1.35962	1.75179	1.58332	0.854919	0.998897	0.758664	0.410642	0.286677	0.373505	0.484624	0.409844	0.477159	0.691541	0.925054	0.522323	1.01361	0.849852	0.348487	0.476353	0.790933	0.764493	1.36077	0.502956	0.833439	1.04346	0.858675	0.806986	0.562714	0.700308	0.909164	0.567323	0.258624	0.679104	0.738732	0.594487
9931	TAG(19:1/19:1/19:1)	0.946224			949.803	703.351	1.17946	1.96976	2.28452	2.44647	1.1357	0.924326	1.39215	0.95415	3.83202	4.28571	3.75127	2.80813	2.29937	1.85412	1.16734	1.45913	0.857142	2.02007	1.05697	1.28212	1.948	2.20514	1.13396	1.63559	1.70885	1.32488	1.12091	2.86525	2.23902	4.46666	0.962348	2.23337	2.32709	2.34758	1.32424	1.77287	2.13534	2.01477	0.90108	1.92738	1.25942	1.89529	1.92064
7862	TAG(16:1/16:1/16:1)	0.946224			823.676	673.419	0.11057	0.0843869	0.0743495	0.159928	0.0656416	0.0800631	0.0814449	0.159231	0.16428	0.125491	0.074341	0.271511	0.427494	0.192977	0.138003	0.207905	0.11353	0.301777	0.0912475	0.0970133	0.151059	0.0998288	0.131	0.0581615	0.117584	0.128219	0.0687136	0.0929908	0.109216	0.12836	0.0721268	0.116642	0.178719	0.106237	0.0520627	0.112064	0.113163	0.0918584	0.219228	0.550676	0.0851485	0.1316	0.146813
8446	TAG(17:3/17:3/17:3)	0.946224			853.654	598.927	0.109418	0.583119	0.43217	0.611252	0.557279	0.555922	0.543704	0.684188	0.730199	0.816759	0.773631	0.372445	0.668821	0.776622	0.704949	0.589239	0.645851	0.420789	0.528435	0.916036	0.601041	0.820077	0.64632	0.77963	0.633695	0.519376	0.558367	0.717029	0.783018	0.547937	0.685812	0.641711	1.21814	0.768642	0.772508	0.570219	0.769579	0.743232	0.667072	0.285693	0.577431	0.685274	0.622553
7168	TAG(15:0/15:0/15:0)	0.946224			787.669	551.635	16.7422	64.4357	39.9476	60.3559	59.5196	66.5472	57.6283	68.6303	91.0312	89.1634	86.862	39.6387	57.1137	104.715	60.2137	57.6678	62.6927	49.4416	55.532	88.264	63.8071	97.0079	67.0543	77.5687	60.8662	70.1083	52.0239	74.4458	97.0501	58.1046	75.2507	68.763	91.9673	80.3323	64.1047	60.5076	98.2218	98.7366	77.5773	33.9097	50.1131	72.6857	70.0091
7072	TAG(15:1/15:1/15:1)	0.946224			781.593	511.681	1.42806	0.672893	1.17641	1.5063	2.71487	2.44681	1.71036	1.82528	3.03642	1.57085	2.24825	1.41833	1.6548	1.74633	1.29513	1.91981	1.36721	1.15724	1.91655	2.81849	1.78152	1.86752	0.698676	2.0552	4.1375	1.41415	3.31704	1.33604	1.85069	1.53522	2.46028	1.27334	2.99267	2.7429	0.928833	0.782178	2.41185	1.3665	1.21531	0.435437	0.634594	1.7728	1.70077
5780	TAG(13:0/13:0/13:0)	0.946224			703.575	495.641	0.11154	0.313768	0.0851938	0.469322	0.259987	0.294694	0.295007	0.369237	0.308091	0.277711	0.345094	0.190183	0.25547	0.638659	0.254456	0.364508	0.28182	0.234356	0.163936	0.437948	0.297549	0.471323	0.220346	0.280616	0.212414	0.368334	0.469795	0.408347	0.350417	0.394176	0.347444	0.254874	0.486293	0.676954	0.401464	0.264985	0.507777	0.379135	0.363585	0.166727	0.237008	0.363101	0.286258
6452	TAG(14:0/14:0/14:0)	0.946224			745.622	482.106	0.193312	0.573855	0.449084	0.861338	0.63485	0.728928	0.578648	0.57534	1.09611	0.677377	0.511686	0.555424	0.405976	0.874129	0.486627	0.532089	0.545197	0.397965	0.566001	0.535399	0.588967	1.55306	0.605336	0.643314	0.600352	0.726106	0.643508	0.546863	0.678823	0.831444	0.517709	0.610308	1.38957	0.594689	0.55463	0.634944	1.30614	0.925053	0.668062	0.501437	0.379523	0.745544	0.641737
7626	TAG(16:3/16:3/16:3)	0.946224			811.602	465.317	35.2014	67.6698	62.0972	75.8732	70.414	86.3426	78.6153	72.4468	113.76	88.2219	82.3443	66.0692	93.5965	91.4357	60.3979	93.1941	77.141	73.1221	64.6425	72.9733	76.278	82.4893	61.1657	88.9905	58.3521	82.1084	72.7842	77.1001	84.4101	94.98	75.0347	84.6255	157.378	93.1108	103.123	69.5617	104.633	85.7199	77.718	58.413	59.8188	83.5758	70.3467
6832	TAG(15:3/15:3/15:3)	0.946224			769.556	459.089	11.2264	23.0438	23.0241	24.1147	24.7864	30.3347	28.0704	26.3142	32.3661	28.908	25.5468	20.7791	20.0623	27.9451	24.7669	24.0187	23.8457	20.4383	26.6168	30.0727	24.8141	25.1232	22.0682	28.135	18.7306	23.5545	22.8682	23.6168	29.5093	28.4585	27.938	29.9923	50.1996	31.1511	24.0163	22.8433	33.4607	31.0718	22.6404	15.9319	24.4415	26.7876	24.7387
7497	TAG(16:4/16:4/16:4)	0.946224			805.554	413.842	6.53014	6.00976	6.14328	5.62476	6.373	6.73946	6.06846	6.70914	5.87515	6.40466	5.92006	7.01168	6.40193	5.69172	6.39376	5.79776	6.44424	6.85692	6.09701	5.32663	6.22098	5.53204	5.55935	5.91661	6.01436	5.91652	6.15477	5.12166	6.31772	6.31187	6.17888	5.76154	21.7282	6.14674	6.21928	5.86162	5.19073	5.16792	6.02574	6.03014	6.36747	6.67616	5.10875
5672	TAG(13:1/13:1/13:1)	0.946224			697.524	340.329	0.0722932	0.916344	0.496265	1.32835	0.417239	0.707421	0.773301	0.905506	1.3227	0.951667	1.15283	0.275753	0.859185	1.7303	0.759837	1.7493	0.469233	0.376086	1.10946	1.33536	0.885421	2.5068	0.529504	1.21642	0.497699	0.907729	0.716759	1.32616	0.989954	1.11958	1.01574	1.20195	1.13248	1.98682	1.02211	0.739335	3.69189	2.40272	0.85792	0.221489	0.373726	1.22284	0.99625
8129	PC(22:0/18:5)	0.945765			836.615	486.13	0.57631	1.77214	1.89607	2.12973	1.45234	1.58538	2.32777	2.01308	2.37912	2.08286	2.44558	1.38087	2.62172	3.29949	1.92738	1.83819	2.4646	2.34094	2.18028	2.28845	2.05012	2.59507	1.27764	1.92104	1.63549	2.21296	1.77166	2.25142	2.1373	2.74756	2.44049	1.62459	4.12318	2.67698	2.75296	2.06104	3.24783	2.52883	2.60154	1.49892	1.49628	2.28014	1.68254
8325	TAG(16:1/16:1/18:1)	0.94562			846.748	675.591	0.0736288	0.0563976	0.0492237	0.12625	0.0367739	0.0490857	0.0574749	0.0864877	0.137264	0.160205	0.0806624	0.23447	0.28947	0.136528	0.0826502	0.140638	0.0840074	0.239339	0.0612504	0.0593592	0.112058	0.0595785	0.0675769	0.0268754	0.0722978	0.0711052	0.0337931	0.0700038	0.079889	0.114772	0.0407072	0.0716821	0.0937602	0.0701121	0.0451926	0.0910159	0.0916033	0.0797158	0.133324	0.421893	0.065301	0.09001	0.120123
6699	PC(8:0/26:1)	0.945615			760.583	463.76	101.418	154.071	134.775	145.4	124.702	129.247	128.698	162.399	158.98	130.339	163.05	134.31	163.046	161.318	170.906	181.93	153.889	138.007	152.431	164.658	147.679	170.496	110.649	151.915	127.927	159.725	119.877	122.045	128.984	155.249	167.746	127.507	210.923	174.21	129.69	126.568	183.554	153.459	152.383	109.852	154.896	146.883	133.87
6231	PC(6:0/26:2)	0.945021			730.537	393.143	0.778869	1.64709	0.788011	1.553	0.953589	1.19507	0.992302	1.38719	1.34532	0.806594	1.37297	0.951021	1.37146	1.82027	1.11984	2.00958	1.2475	1.16035	1.03236	1.48449	1.25084	2.30562	1.00806	1.1221	1.2465	1.73801	1.20071	1.20103	1.21004	1.38659	1.23439	1.47366	2.26056	1.36349	1.04729	1.15372	2.10185	1.7732	1.09763	1.24219	1.00918	1.40879	1.14347
11916	CL(14:0/22:3/14:0/22:4)	0.944476			1469.01	580.677	0.0322333	0.152835	0.100933	0.164132	0.132249	0.224848	0.147845	0.15047	0.133773	0.214386	0.189772	0.0810858	0.0853912	0.227519	0.190152	0.193961	0.113428	0.102037	0.162231	0.205046	0.150216	0.280533	0.109469	0.169871	0.110787	0.12549	0.134186	0.14014	0.182373	0.155445	0.175241	0.176982	0.229946	0.163816	0.114066	0.156582	0.305419	0.262579	0.189429	0.0757821	0.17092	0.171453	0.163395
6064	PC(4:0/27:0)	0.943563			720.546	454.993	0.429086	1.91328	0.811726	1.52912	1.24526	1.46028	1.5516	1.82414	1.76189	1.29683	1.04398	1.34047	1.75568	1.80892	1.111	2.08967	1.42286	1.12165	1.60098	1.86703	1.44927	2.43771	1.14245	0.874956	1.32888	2.01418	1.29498	1.27591	0.955398	1.59996	1.02791	1.57448	2.82795	1.92601	1.42194	1.53271	2.27795	1.79456	1.52586	0.958511	1.10893	1.54506	0.930807
7683	PC(22:4e/18:5)	0.942691			814.559	401.581	1.31581	6.80848	5.19534	6.97771	8.07415	4.52153	8.56976	2.85038	14.3317	4.56082	4.70981	7.26731	1.41554	20.9882	5.98365	9.50154	5.79259	9.75359	10.7373	12.1586	7.57569	14.4422	5.93305	10.3281	10.5076	12.0258	7.10034	14.9922	8.09716	11.5927	13.8306	11.6622	15.1992	8.12056	10.955	8.10069	13.7062	12.2738	7.54499	5.07371	11.4797	10.6483	12.3699
7149	PC(20:4e/18:5)	0.942691			786.501	378.702	0.0723007	0.166885	0.236717	0.271993	0.198982	0.342721	0.305468	0.312747	0.33138	0.369328	0.231139	0.113123	0.180514	0.359684	0.208805	0.337976	0.197476	0.118094	0.31381	0.364113	0.251663	0.188561	0.259808	0.264074	0.168259	0.17462	0.20881	0.252501	0.301567	0.279001	0.254608	0.30785	0.489215	0.358998	0.24556	0.195545	0.511976	0.430057	0.204462	0.0770827	0.183981	0.267827	0.236995
7638	PC(22:5e/18:5)	0.942691			812.542	375.978	4.4742	10.876	11.2866	15.5254	9.58794	15.9476	13.372	11.6481	20.7957	15.187	14.2301	5.92061	7.66589	17.4876	11.1864	11.2085	13.2971	10.1372	14.2524	13.4783	12.3782	17.8078	9.98412	18.014	10.1134	13.6556	8.80955	12.1554	16.3399	17.3983	14.1379	14.9151	22.7894	16.3174	10.2386	7.6751	24.7383	9.09358	10.9616	4.61401	10.7137	13.5236	13.9056
6731	PC(18:2e/18:5)	0.942691			762.526	373.057	0.78267	2.66596	1.99038	2.52404	2.00479	2.10363	2.25661	2.54753	3.09701	2.31863	2.91366	1.78136	1.60534	3.42792	2.91559	3.39888	2.09723	2.0181	2.14228	3.74526	2.41684	4.18412	1.78394	2.91303	2.14093	2.49276	1.92876	2.68086	2.78928	2.36777	3.10477	2.50132	3.26221	3.8087	2.25192	1.56812	4.03454	4.11401	2.23801	1.1599	1.86077	2.65929	2.50533
7594	PC(18:5e/22:6)	0.942691			810.501	365.452	0.023766	0.152833	0.184229	0.065726	0.0953709	0.179273	0.181704	0.275187	0.27532	0.327563	0.235719	0.0938656	0.132394	0.297363	0.150816	0.148531	0.116207	0.0620602	0.163786	0.317584	0.173965	0.0941062	0.192227	0.255159	0.109311	0.0789246	0.106627	0.181942	0.233632	0.104456	0.2533	0.198597	0.270541	0.453002	0.315269	0.154193	0.35967	0.294116	0.220751	0.043266	0.119742	0.201942	0.171736
7147	PC(18:4e/20:5)	0.942691			786.528	354.848	0.0962119	1.31352	0.601065	1.36836	1.56966	0.722801	1.75243	0.999689	1.72303	1.25715	1.73511	0.494886	1.28268	3.01671	1.08761	2.00646	0.951453	1.19597	1.68172	2.1713	1.35139	3.1442	1.55653	2.25443	1.86793	1.57402	1.36995	2.11699	1.49761	0.818101	1.59583	2.14457	1.90443	1.42184	1.47525	1.03588	3.20664	3.26323	1.39894	0.81218	1.7664	1.81125	1.85257
7444	PC(22:6e/17:2)	0.942691			802.585	349.107	0.0155349	0.100002	0.0027687	0.0942724	0.0618403	0.0454492	0.226443	0.057558	0.0257033	0.00185445	0.127455	0.0734393	0.0624808	0.0745336	0.0134786	0.388265	0.0477493	0.0391723	0.00400955	0.0795905	0.07708	0.104149	0.259245	0.0611005	0.0497753	0.075697	0.0840676	0.00219487	0.106793	0.31731	0.0314554	0.03405	0.349492	0.0574102	0.0457023	0.233733	0.0507403	0.513108	0.0681565	0.0268984	0.228634	0.134986	0.0280393
7114	PC(18:5e/20:5)	0.942691			784.51	330.305	0.196523	1.11954	0.6131	1.34684	0.885011	1.26228	1.21334	1.4133	2.54627	1.46811	0.98066	0.658385	0.66156	1.45645	1.17933	1.10642	0.75246	1.01437	1.04472	1.86803	1.13934	1.63273	1.35303	1.69608	0.743407	0.965106	0.862084	1.62892	1.92943	1.62973	1.55886	1.95944	1.59413	1.79374	0.929043	0.713674	2.08938	1.76008	0.840186	0.54137	0.961389	1.35909	1.27126
12038	CL(14:0/22:4/16:0/22:5)	0.941103			1493.02	585.726	0.0167448	0.143427	0.0703209	0.0964373	0.111123	0.101058	0.155966	0.141451	0.185905	0.141004	0.103398	0.0902276	0.124942	0.21686	0.141297	0.122046	0.130325	0.108441	0.113123	0.166109	0.12401	0.161038	0.109967	0.159085	0.155501	0.123657	0.0937001	0.192035	0.151365	0.138496	0.123373	0.154956	0.276216	0.160577	0.133219	0.129959	0.217616	0.220986	0.182837	0.0703596	0.139982	0.154746	0.131808
5786	PC(15:0/15:1)	0.941072			704.522	364.56	0.172467	0.981303	0.16211	0.663672	0.249412	0.22556	0.200737	0.673895	0.595078	0.184856	0.514738	0.399356	0.274839	0.518191	0.354498	1.00662	0.428339	0.358194	0.455143	0.671901	0.454545	1.27858	0.293298	0.521091	0.494755	1.38885	0.465411	0.524269	0.574026	0.53493	0.583813	0.79248	0.802158	0.806398	0.396546	0.485855	1.16585	0.610285	0.439398	0.480253	0.206445	0.642235	0.574955
5536	DAG(18:0/22:5)	0.940848			688.618	555.381	0.036516	0.0413084	0.0491944	0.040989	0.29783	0.0338025	0.033228	0.0650684	0.0682153	0.0428472	0.0572295	0.0586154	0.0595071	0.0480359	0.0581842	0.0679285	0.0314391	0.046291	0.0447828	0.060145	0.0620579	0.0217987	0.0309573	0.0367141	0.0316687	0.0503554	0.0324888	0.0324478	0.0337691	0.0405383	0.0483286	0.0306067	0.0465549	0.0953394	0.0527205	0.0318987	0.0347221	0.0255412	0.03622	0.215559	0.0814194	0.0504825	0.0462633
6207	PC(10:0/22:3)	0.939994			728.522	338.589	0.037526	0.0784215	0.0387505	0.0739027	0.0449272	0.0800633	0.0930664	0.103125	0.193546	0.0688453	0.0833759	0.0347188	0.051978	0.118208	0.0716583	0.113589	0.0449469	0.0715437	0.0758789	0.106529	0.07923	0.110953	0.0517633	0.0729748	0.0438551	0.0860253	0.055688	0.114239	0.116989	0.0798205	0.138319	0.112539	0.153491	0.0994935	0.0935563	0.0582874	0.164556	0.108851	0.0737252	0.0642245	0.0572095	0.092828	0.0803102
7116	PC(14:0/22:3)	0.939893			784.584	437.944	31.0983	158.11	146.194	132.654	205.7	163.876	209.222	184.488	225.473	141.191	125.37	101.173	189.808	236.432	214.72	146.136	196.387	180.369	130.336	245.277	168.201	296.672	182.26	200.76	224.841	219.537	142.68	259.278	267.646	142.168	209.304	237.233	290.128	242.724	230.74	232.119	216.554	206.178	259.557	140.391	253.953	222.736	149.229
8355	TAG(16:0/16:0/18:2)	0.93889			848.674	765.432	0.00179655	0.00815758	0.000327355	0.00232284	0.00763047	0.00317597	0.000837903	0.00457453	4.05889e-05	0.000576245	3.78662e-05	0.000292142	3.97844e-05	3.9754e-05	0.011872	0.0037472	0.00316897	0.006239	0.00502134	0.00565387	0.0032776	0.00291804	0.00199101	3.55792e-05	0.000596322	0.00135347	0.000158707	0.00306655	0.00553186	4.01253e-05	0.000381499	0.00560738	0.00103384	0.000320608	0.000991454	0.00933001	0.00369842	0.00135011	0.000382934	0.00849371	0.000321318	0.00238015	0.00188084
8019	TAG(14:3/18:5/18:5)	0.938884			831.573	366.457	1.19666	10.6283	8.16031	9.2579	7.14443	11.194	10.4114	13.9995	24.0685	17.6049	14.5546	7.30854	6.9564	19.3903	8.70767	11.4352	7.17462	7.33665	11.1766	19.4426	11.3575	14.2822	9.58135	16.8973	7.67223	10.9253	9.97266	19.3717	12.9117	14.7497	17.8095	17.933	20.4811	30.7553	15.3279	10.0298	31.3383	26.3642	10.3317	3.9068	9.04365	15.4843	13.4666
6895	PC(16:4/20:5)	0.938506			772.51	237.474	0.0551065	0.181153	0.00220015	0.16532	0.145315	0.099074	0.0389648	0.175784	0.0870087	0.0199699	0.159968	0.0427822	0.122758	0.0892001	0.13284	0.145835	0.0691004	0.0861034	0.0402122	0.0736319	0.0966163	0.13616	0.0119662	0.109558	0.00889322	0.156027	0.0965696	0.0457988	0.231186	0.0134624	0.0466188	0.0392345	0.123181	0.110595	0.11944	0.0915972	0.0967064	0.0170926	0.0913843	0.0383565	0.110037	0.0846933	0.0921195
5722	HexCer/NS(d18:1/16:0)	0.937473			700.572	402.849	0.211256	0.25696	0.258271	0.403135	0.178331	0.234433	0.311464	0.30778	0.237123	0.215267	0.166029	0.400739	0.470343	0.27139	0.263523	0.423071	0.347401	0.267643	0.303463	0.230593	0.287911	0.36845	0.182081	0.220389	0.18019	0.314608	0.213904	0.277241	0.247285	0.276009	0.276344	0.260353	0.297862	0.169805	0.224221	0.203748	0.364907	0.266298	0.309894	0.507028	0.315725	0.273817	0.317567
3887	PC(5:0/16:4)	0.937204			572.334	77.9681	0.142216	0.177703	0.185305	0.166344	0.18901	0.202188	0.192041	0.235725	0.251584	0.1962	0.25986	0.192316	0.241674	0.227128	0.232095	0.295878	0.156759	0.262494	0.160691	0.328778	0.2148	0.192919	0.0911078	0.18077	0.0717501	0.116791	0.123765	0.0920733	0.206248	0.086472	0.142303	0.10286	0.231775	0.165133	0.160633	0.160371	0.181845	0.0533859	0.16443	0.21364	0.233526	0.14859	0.209937
8886	TAG(16:0/18:1/18:1)	0.936923			876.71	681.049	0.408523	0.279565	0.364094	0.566244	0.160781	0.249121	0.156835	0.236746	0.517671	0.927654	0.337415	0.801315	0.215127	0.446865	0.387892	0.757572	0.402307	1.18737	0.288406	0.248897	0.44702	0.235122	0.195777	0.0678473	0.17905	0.263291	0.114394	0.150562	0.364844	0.589237	0.200407	0.361481	0.230055	0.281069	0.183565	0.2912	0.210991	0.353084	0.496374	1.22931	0.362039	0.317985	0.353799
6851	PC(13:0/22:3)	0.935735			770.567	408.015	0.191514	1.30188	0.480962	0.833419	1.01662	0.723911	0.943434	0.772247	1.00014	0.876185	0.786089	0.501553	1.1384	1.32945	0.593886	1.52599	0.664812	0.625768	0.927516	0.740349	0.848706	2.28364	0.709561	0.908273	0.876524	1.18553	1.05001	0.869802	0.918252	0.960671	0.839746	0.988551	1.77725	0.851003	0.996256	1.05247	1.75935	1.24347	1.38761	0.684167	0.965999	1.11541	0.89367
7653	HexCer/NS(d18:1/24:0)	0.935215			812.66	561.751	0.175798	0.0957913	0.0474713	0.0913647	0.180158	0.074047	0.108866	0.0490911	0.0897045	0.0549578	0.226369	0.0612297	0.428761	0.181191	0.0573684	0.0444093	0.0881316	0.053115	0.275622	0.0441616	0.12138	0.13395	0.169656	0.132968	0.131123	0.0850898	0.0535309	0.113601	0.158915	0.12951	0.0776449	0.0713216	0.216409	0.248748	0.154432	0.120096	0.190188	0.104818	0.107476	0.204629	0.0807835	0.134244	0.103708
7617	TAG(15:0/16:0/16:0)	0.933144			810.752	715.918	0.0596485	0.0421404	0.0397833	0.0802897	3.72341e-05	0.00620908	0.00584201	0.158587	0.0794442	0.165974	0.0191385	0.120334	0.259713	0.101742	0.065059	0.169056	0.0154373	0.154835	0.00720962	0.06207	0.0806274	0.0916046	0.263705	0.00780554	0.0268156	0.0353104	3.70593e-05	0.0898839	0.0344584	0.102993	3.71217e-05	0.0707121	0.0122974	0.0676942	3.80742e-05	0.0669499	0.0386501	0.0433956	0.058949	0.2526	0.0343002	0.0649119	0.160079
8175	TAG(16:0/16:0/17:0)	0.932888			838.784	734.774	0.094655	0.117823	0.106075	0.193838	0.119822	0.11214	0.109021	0.154284	0.139599	0.192833	0.0880881	0.306689	0.368546	0.168624	0.126261	0.294639	0.0759659	0.168147	0.101606	0.0952635	0.156696	0.206975	0.235392	0.0942781	0.121892	0.12576	0.0826399	0.107204	0.124401	0.242064	0.0701724	0.171928	0.172855	0.111032	0.0683676	0.143306	0.150221	0.113301	0.163918	0.452067	0.100142	0.152896	0.186598
7376	PC(13:1/24:2)	0.932264			798.591	440.861	0.209379	0.772598	0.794473	0.938303	1.26651	1.92463	1.09473	1.28145	1.91054	1.38861	0.856612	0.978546	0.912684	1.14035	1.02704	1.70781	0.824152	0.629981	1.19038	1.03782	1.09433	1.95084	0.77496	1.77549	0.780402	1.49443	0.965782	0.813178	0.864504	1.01287	1.23964	1.20303	2.30643	1.41259	0.899127	0.766109	1.90847	0.971397	0.985131	0.552313	0.814752	1.17457	1.18817
6030	PC(5:0/26:1)	0.931563			718.536	389.44	0.332802	1.37131	0.287612	0.472763	0.311072	0.341733	0.374546	0.46555	0.823215	0.198123	0.371719	0.416825	0.622363	0.577719	0.533887	0.771444	0.381355	0.316285	0.36402	0.401706	0.486803	0.833455	0.285064	0.494183	0.447081	1.92275	0.485552	0.404834	0.501801	0.453642	0.418467	0.612	0.756291	0.533485	0.285286	0.392839	0.542776	0.44488	0.309402	0.469599	0.396655	0.549502	0.451156
1913	ACar(14:2)	0.928647			368.313	91.3949	0.0415531	0.0274761	0.0813344	0.112627	0.0323422	0.0221647	0.0402244	0.0353438	0.024549	0.0428273	0.134351	0.0657699	0.0446002	0.0386513	0.0407095	0.0250264	0.0983765	0.0786822	0.0535862	0.0201587	0.0530177	0.0647416	0.0632866	0.108491	0.036861	0.0543423	0.0489249	0.038278	0.0955189	0.0651254	0.0273795	0.0565174	0.100712	0.0411168	0.133097	0.0183754	0.0552852	0.217618	0.0579043	0.0562534	0.0725722	0.07062	0.0264061
8137	TAG(15:0/16:0/18:1)	0.921815			836.797	739.485	0.0163172	0.00889518	0.00845814	0.0416296	0.00812555	0.00844896	0.0101799	0.00325642	0.00756694	0.021646	0.00912318	0.0119062	0.0128234	0.0161897	0.00446243	0.0190998	0.00355307	0.0145272	0.0108514	0.00488834	0.0120974	0.0200547	0.00348271	0.00837428	0.00510882	0.00741164	0.00264641	0.0237137	0.0124119	0.0158072	0.0017836	0.0171393	0.00680802	0.0145159	0.00428184	0.0125996	0.00773575	0.0118739	0.0104611	0.172546	0.00735315	0.0183055	0.0100047
5594	PC(2:0/27:0)	0.920908			692.52	380.279	0.0574278	0.378619	0.0461057	0.1643	0.0843509	0.160479	0.143871	0.24527	0.126591	0.0490166	0.116213	0.149914	0.285302	0.175174	0.233593	0.356476	0.143936	0.0989424	0.145755	0.116386	0.163886	0.569904	0.108678	0.153215	0.185397	1.24071	0.185826	0.0949393	0.16872	0.204035	0.129614	0.214976	0.366783	0.178212	0.110823	0.176992	0.332942	0.163968	0.14888	0.195423	0.117515	0.252378	0.210259
4490	Cer/NS(d18:1/22:0)	0.920653			622.612	574.309	1.70333	7.3834	3.09629	5.28454	2.38912	6.76495	5.54329	8.89186	11.644	10.8847	10.8129	5.76751	8.71069	14.3593	8.72641	10.5042	7.85083	6.02049	8.65567	12.4243	7.87088	8.17746	7.88641	6.67065	6.03525	10.2343	5.84026	6.71312	8.7067	5.89215	7.13844	4.00412	4.95662	9.84875	5.43182	5.83847	10.1533	9.99434	10.1563	3.55476	8.00735	7.26203	7.35754
3826	Cer/NS(d18:1/18:0)	0.920456			566.551	499.581	0.570249	1.30288	0.668515	1.41207	0.91714	1.70329	0.942603	1.49413	2.91378	2.2101	1.50058	1.73584	1.41206	2.57808	1.60364	1.68472	1.69886	1.18652	1.91237	2.08507	1.57662	2.07542	1.41266	0.900859	1.20475	1.77609	1.60083	1.08772	1.23932	1.38299	0.932242	1.30439	2.17622	1.47042	0.698559	1.21996	2.47775	1.6043	1.92505	1.3247	1.7304	1.47723	1.50593
9631	TAG(17:0/17:0/21:2)	0.918644			923.789	696.046	1.26002	2.07647	1.31183	2.85866	0.999924	1.00719	1.51626	1.18426	3.00749	4.76926	3.40973	2.92957	2.62411	1.88822	1.06809	0.853405	1.16006	2.11827	0.73695	1.05863	1.89192	3.02509	1.19105	1.84744	2.15352	1.25115	0.978993	2.39979	1.85884	4.21944	0.993996	2.38976	2.40436	3.23864	1.69571	2.4009	3.10371	2.47824	1.33819	1.5389	1.63407	2.10709	1.98085
7685	PC(19:1/19:1)	0.918322			814.62	490.435	0.893162	4.33208	1.6015	3.96406	3.18411	2.14264	4.18204	2.85301	5.88817	5.12688	4.09406	2.20676	4.35964	8.67125	3.01379	3.29399	3.88039	3.67681	4.20192	3.89759	3.77319	6.70567	2.43029	3.25025	4.17257	4.59974	3.52646	5.21244	5.00732	4.44696	3.52438	3.39674	7.75784	4.33969	5.32723	4.36378	7.06909	6.24763	6.4347	2.55631	3.7106	4.70398	3.94473
5165	CE(18:2)	0.918067			666.617	713.404	4.93593	2.00061	6.27465	7.37655	2.27331	1.64163	2.69319	3.0805	4.64117	9.16317	4.24326	6.09198	13.6976	6.7219	4.40721	9.43836	4.2127	8.37322	4.11251	2.49207	5.39357	3.52901	1.66604	0.947843	1.54022	5.3073	2.15673	1.97122	3.01634	8.3537	2.438	7.39474	3.61096	2.27144	3.23704	5.9018	2.80613	4.82073	5.85987	18.8323	3.01085	4.43361	5.19525
5058	DAG(18:2/20:3)	0.915746			660.554	484.81	0.123394	1.05949	0.441382	0.731123	0.480362	0.427122	1.13959	0.856038	0.916025	0.932542	1.21391	0.505585	0.98866	1.66496	0.859331	0.73649	0.59137	0.547301	0.706716	1.16424	0.804281	1.16926	0.632527	0.671972	0.722591	0.765485	0.562268	1.0524	1.00545	0.631563	0.664223	0.732251	1.4348	0.861179	1.36317	0.704775	1.1535	1.35785	0.999303	0.345699	0.719609	0.877494	0.795026
3501	Cer/NS(d18:2/16:0)	0.915511			536.504	414.377	0.253739	0.592414	0.436456	0.590477	0.431834	0.603489	0.520139	1.0133	0.689306	0.554475	0.86752	1.0159	0.847507	0.95002	1.09253	1.04422	0.673812	0.674358	1.06049	1.12133	0.751665	0.764309	0.450609	0.513642	0.625857	0.825328	0.598392	0.58382	0.725177	0.599971	0.766389	0.589719	1.10357	0.963863	0.572669	0.556404	1.06641	0.675661	0.777145	0.609597	1.08639	0.722746	0.770408
10450	TAG(20:3/20:3/22:6)	0.915071			1001.69	651.65	0.00287643	0.0167782	0.00239567	0.0246615	0.0278096	0.0325062	0.00801225	0.014617	0.0191016	0.0143416	0.0172827	0.00695189	0.00714072	0.0331046	0.0273596	0.0176256	0.0295473	0.0101305	0.0114297	0.0147442	0.0169209	0.0377227	0.0148356	0.0164962	0.0237816	0.0186036	0.0394798	0.0238921	0.0304312	0.0151545	0.00328287	0.0247362	0.00486959	0.0189127	0.0229945	0.0220494	0.041834	0.0440853	0.0120324	0.0103806	0.0142641	0.021992	0.0111468
9951	TAG(18:0/18:0/21:2)	0.91386			951.82	715.958	0.631946	2.0218	1.71529	1.75869	0.938332	0.848116	1.00053	0.995122	2.4055	4.72629	3.58909	1.13137	2.90082	1.85243	1.00436	0.954817	0.749894	1.48236	1.06692	0.986824	1.63802	2.55078	1.10432	1.71174	1.85695	0.943969	0.922656	2.18241	1.68173	3.06363	0.818608	1.69196	2.11275	2.06242	1.54527	1.86783	1.95143	2.01895	0.746526	1.23127	1.30191	1.66836	1.65121
8120	BMP(18:2/22:6)	0.912332			836.542	245.014	0.0409532	0.254424	0.122702	0.187757	0.193915	0.13964	0.0942845	0.300045	0.203127	0.096561	0.246068	0.08543	0.110725	0.134281	0.145368	0.151687	0.119724	0.111218	0.0929188	0.295578	0.15632	0.113719	0.127254	0.265934	0.0610762	0.112069	0.0857428	0.100657	0.161285	0.0925483	0.119804	0.120555	0.270022	0.174662	0.130931	0.0993371	0.222259	0.144438	0.1279	0.0501282	0.106813	0.134357	0.154156
9437	TAG(18:0/18:1/18:1)	0.909918			909.776	731.888	0.40268	0.333127	0.350349	0.602075	0.279205	0.262895	0.237731	0.285531	0.412898	0.737417	0.429985	0.493259	0.600626	0.466042	0.321435	0.514539	0.381528	0.56663	0.311624	0.280292	0.413493	0.545957	0.24783	0.222141	0.410828	0.383961	0.273211	0.328405	0.351723	0.548009	0.21284	0.331542	0.421598	0.337296	0.235564	0.410417	0.346152	0.386074	0.383898	0.766182	0.438924	0.379128	0.348846
4901	Cer/NS(d18:1/24:0)	0.909695			650.643	605.49	2.39507	10.2546	4.88477	7.91143	8.01003	8.84181	7.92253	12.6483	11.1179	13.2971	12.8632	7.82225	14.764	18.1885	12.1685	16.5742	10.2426	7.91735	10.0095	18.2211	10.8027	9.62124	9.71372	8.4193	8.43626	5.36062	7.47279	10.0599	13.1605	7.52849	11.0162	4.96851	18.9543	13.3503	10.3413	8.6282	11.4204	12.5003	12.7271	4.33489	11.5032	9.97587	10.3135
4663	Cer/NS(d18:2/23:0)	0.909621			634.613	562.533	0.0904482	0.358241	0.148	0.309961	0.283786	0.293528	0.286683	0.610193	0.526188	0.376301	0.570615	0.472466	0.560088	0.612348	0.351829	0.68315	0.298982	0.278424	0.536565	0.404628	0.402621	0.406166	0.296346	0.284935	0.255949	0.410861	0.14558	0.271152	0.339588	0.279604	0.266482	0.285911	0.637111	0.329346	0.294871	0.248342	0.486036	0.340711	0.44387	0.218148	0.29052	0.326576	0.393724
8816	TAG(16:0/16:0/20:4)	0.909291			872.717	727.545	0.0431157	0.0205351	0.0379346	0.0625351	0.0336607	0.0308699	0.0349708	0.0440925	0.0487639	0.0525928	0.0421768	0.0839536	0.121404	0.0621851	0.0583512	0.0986347	0.0429758	0.0901209	0.0313426	0.0440237	0.054212	0.0332977	0.0309552	0.0237555	0.0488537	0.0438884	0.0223408	0.03076	0.0440193	0.0448242	0.037427	0.0463232	0.0349032	0.0413496	0.028586	0.0429884	0.0308601	0.0335874	0.0716597	0.0785392	0.0392976	0.0404108	0.053002
4871	Cer/NS(d18:1/24:1)	0.908741			648.618	550.525	0.030433	0.15254	0.0455893	0.128751	0.127786	0.0310072	0.0688018	0.111527	0.0695356	0.0959731	0.102564	0.0796872	0.194607	0.210806	0.129464	0.0922125	0.097739	0.138947	0.0675599	0.102709	0.103912	0.258222	0.109929	0.0655353	0.107891	0.113533	0.0723849	0.0807419	0.153992	0.0616416	0.0714059	0.0564911	0.139904	0.455205	0.127284	0.0742261	0.0414985	0.0913318	0.22076	0.0822638	0.173546	0.127889	0.108446
6959	PC(14:1/22:6)	0.908384			776.52	360.342	0.0126614	0.536504	0.172988	0.452924	0.247175	0.485857	0.666687	0.636888	0.750809	0.281663	0.420955	0.275199	0.379039	0.84733	0.587837	0.557253	0.326335	0.326432	0.32924	0.585856	0.443982	1.14962	0.356953	0.53386	0.438213	0.56109	0.299351	0.637883	0.73301	0.587578	0.547251	0.782278	1.00859	0.709788	0.448427	0.47516	1.06491	0.932607	0.380855	0.199417	0.264112	0.605547	0.541753
9926	TAG(18:2/18:2/22:6)	0.906171			949.724	677.844	0.279145	0.539512	0.428502	0.32764	0.279174	0.321075	0.383203	0.371299	1.09312	0.896702	0.748447	1.22943	0.408477	0.423681	0.248344	0.306202	0.270957	0.378419	0.253826	0.253624	0.472039	0.602357	0.300013	0.795391	0.466726	0.316472	0.37947	0.713739	0.609676	1.07692	0.380437	0.848937	1.4561	0.827817	0.868694	0.622262	1.59967	0.892018	0.274165	0.310049	0.377716	0.685932	0.513587
1951	ACar(14:1)	0.904837			370.295	66.3037	0.0128368	0.0790784	0.0601557	0.0521144	0.0556977	0.0697048	0.08882	0.113735	0.562857	0.122657	0.176806	0.109568	0.09102	0.112302	0.0743451	0.142833	0.0506975	0.115752	0.169682	0.204401	0.123253	0.102939	0.0223892	0.171469	0.0541779	0.144325	0.0425937	0.297647	0.218012	0.140638	0.386911	0.096408	0.0525869	0.611777	0.121108	0.0771716	0.448608	0.344402	0.0720997	0.0935182	0.134533	0.181666	0.148195
9219	TAG(17:0/18:1/18:1)	0.904094			895.77	737.939	0.09256	0.0633447	0.0834412	0.13057	0.0733212	0.073547	0.0448535	0.0778296	0.131566	0.204646	0.102904	0.243596	0.309292	0.124904	0.10571	0.289467	0.0990127	0.200741	0.0776398	0.0670482	0.1298	0.151539	0.0637999	0.0508583	0.0775273	0.117616	0.0609015	0.0569768	0.0617957	0.133767	0.0451386	0.068634	0.0810952	0.072578	0.0397588	0.0727358	0.0763656	0.0654541	0.139749	0.235243	0.110901	0.0891217	0.108583
8814	TAG(16:1/18:1/18:2)	0.903509			872.764	678.375	0.220942	0.141087	0.202324	0.370525	0.0920932	0.112473	0.141543	0.149236	0.396322	0.688896	0.247981	0.622153	0.491272	0.301388	0.212562	0.43137	0.205905	0.650745	0.171067	0.146204	0.299804	0.191424	0.0976551	0.0733494	0.176862	0.158498	0.0786426	0.140051	0.219017	0.333161	0.0830055	0.183314	0.185207	0.247728	0.0939661	0.229752	0.185531	0.204781	0.263806	0.95962	0.215582	0.216048	0.266045
2493	ACar(18:0)	0.902842			428.373	152.619	0.138751	0.275716	0.177722	0.243485	0.265534	0.394648	0.48729	0.7882	3.24732	0.645262	1.1485	0.938205	0.596493	0.867095	0.311398	1.00876	0.39892	0.383718	1.10745	0.866238	0.714535	0.425276	0.354038	1.2873	0.211431	0.451826	0.303493	1.13391	0.588775	0.865194	1.5687	0.510589	0.423919	2.86174	0.37209	0.233021	1.52898	1.21141	0.53594	0.652781	0.457493	0.798896	0.712567
6598	PE(11:0/26:4)	0.902591			754.536	435.922	0.434964	1.23824	1.08724	1.08695	1.61171	2.18186	1.26156	1.7618	1.98689	1.67889	1.23334	1.01155	1.12033	1.16064	1.73543	2.35399	1.64302	0.911362	1.46643	1.51725	1.42417	1.8056	1.22008	1.76058	0.988731	1.43987	1.25966	0.787543	1.18366	1.29185	1.38302	1.52478	2.90716	1.72772	1.20747	0.88979	2.02086	1.16621	1.10566	0.642879	1.02187	1.36675	1.25155
9769	TAG(18:0/18:0/20:3)	0.902536			935.803	750.614	0.445931	0.609973	0.657105	0.569235	0.562358	0.406495	0.452171	0.319198	0.574094	1.19129	0.580436	0.608627	0.656504	0.753635	0.32	0.36994	0.378959	0.5032	0.366907	0.327031	0.532655	1.15346	0.393983	0.44753	0.660773	0.390299	0.511714	0.678203	0.620079	0.873597	0.254496	0.554936	0.772291	0.575491	0.329451	0.657765	0.623659	0.833625	0.499272	0.512803	0.58187	0.596265	0.577747
8966	TAG(16:0/18:0/18:0)	0.902435			880.787	784.02	0.0116585	0.0314429	0.00555852	0.0381197	0.0344479	0.0167603	0.00772139	0.0423492	0.00201614	0.00930029	0.00653486	0.00176418	0.00339359	0.00130683	0.0531284	0.0168288	0.02163	0.0539751	0.026898	0.0362933	0.0210564	0.0305502	0.0119107	0.00557605	0.00591124	0.0114303	0.00327167	0.0251555	0.0364078	0.00476108	0.0068705	0.030025	0.0165171	0.0051033	0.00753875	0.0672486	0.0515264	0.017131	0.00352593	0.0143172	0.00341877	0.0179099	0.01808
4141	Cer/NS(d18:1/20:0)	0.901784			594.582	539.332	0.30663	1.26541	0.508644	1.06745	0.669277	1.21444	0.734182	1.23993	1.94564	1.90556	1.40742	1.17066	1.00706	2.6386	1.3574	1.31588	1.35332	0.927326	1.33455	1.90565	1.26375	2.1702	1.16207	0.826369	0.955531	1.61184	1.04435	0.822782	1.09237	1.0832	0.901534	1.05502	2.08705	1.42548	0.751028	0.856383	1.9164	1.68356	1.46662	0.339306	1.42841	1.23397	1.30581
3528	Cer/NS(d18:1/16:0)	0.90156			538.537	478.862	2.39458	2.38038	2.4171	2.34418	1.11864	2.25581	2.31592	2.37132	2.36372	1.05218	2.13767	2.34358	2.72499	2.34477	2.43697	2.24657	1.07931	2.57641	2.3774	2.17743	2.17295	2.05838	2.24471	2.41252	2.23333	2.27867	2.20552	2.09869	2.3108	2.22789	2.29919	2.24668	4.46277	2.28331	2.28498	2.25837	2.12927	2.06977	2.16658	1.09139	2.44473	2.29038	2.20094
9947	TAG(18:1/20:4/20:4)	0.901487			951.739	686.757	0.827253	2.04533	0.575462	1.42585	0.896483	0.783221	1.28086	1.13475	2.80755	3.35835	3.51698	1.48255	2.27637	1.72204	0.876477	0.939205	0.897104	1.20633	1.04177	1.03301	1.50635	1.91452	1.24797	1.59867	1.59436	1.0212	1.06388	2.14556	1.63527	2.54061	0.843279	1.8907	1.6334	2.39863	1.23774	1.65181	2.25071	2.1538	0.96995	0.877227	1.05006	1.58597	1.60825
4461	Cer/NS(d18:2/22:0)	0.89915			620.598	544.69	0.392968	1.53439	0.979441	1.23697	1.29022	1.48533	1.20434	2.73948	2.34419	1.79327	2.23662	2.06724	2.15811	2.93034	2.02217	2.49778	1.60659	1.2632	2.36079	3.9238	1.90336	1.91734	1.30605	1.39111	1.22855	2.11287	1.08655	1.24848	1.67287	1.43018	1.39741	1.34101	2.95358	2.28472	1.1663	1.22354	2.03613	1.71204	1.86448	0.979907	1.88671	1.61199	1.60906
1980	ACar(14:0)	0.898167			372.288	96.4732	0.0011507	0.00564114	0.00138099	0.00346298	0.00642486	0.0103362	0.0105363	0.0134346	0.0171113	0.0115878	0.00976108	0.0232882	0.00477943	0.0186809	0.0137499	0.00770672	0.00664269	0.00762925	0.0120113	0.0149543	0.0100135	0.00611014	0.00318477	0.00651547	0.00453617	0.00663919	0.00610784	0.00293239	0.00641411	0.00319633	0.0110744	0.00495392	0.0159715	0.0143084	0.00410288	0.00372666	0.00795886	0.0123028	0.0168907	0.00730384	0.00952327	0.00768768	0.00799642
10432	TAG(18:1/22:6/22:6)	0.897052			999.738	670.255	0.0675971	0.503503	0.178535	0.0804034	0.118175	0.0839969	0.257664	0.306262	0.893645	1.03904	1.25177	0.411182	0.562747	0.522082	0.214719	0.153691	0.182941	0.229157	0.154117	0.184244	0.369774	0.483589	0.244068	0.842777	0.257367	0.160803	0.204216	0.395272	0.254564	0.297891	0.214483	0.273345	0.487803	0.624934	0.653166	0.31822	0.489404	0.395153	0.338899	0.0911703	0.284057	0.365559	0.357816
10007	TAG(18:0/18:0/22:6)	0.896376			957.786	724.264	0.879557	1.38808	1.07311	0.862054	0.577852	0.606962	0.708878	0.553951	0.984385	1.7218	1.34396	0.578584	1.14035	1.02506	0.624298	0.466495	0.51918	0.688652	0.66832	0.585352	0.849844	1.28882	0.638454	0.774222	1.07949	0.557882	0.622188	1.42693	0.932823	1.78626	0.436906	0.82124	1.82107	1.09845	0.990197	1.12377	0.927833	1.11192	0.662666	0.549593	0.697843	0.967428	0.774469
9704	TAG(18:1/18:1/20:4)	0.896346			929.745	692.942	0.255947	0.369817	0.352524	0.531606	0.286022	0.427156	0.278171	0.212669	0.417399	0.359427	0.475036	0.195464	0.371637	0.275147	0.162074	0.233585	0.18569	0.298416	0.210587	0.23659	0.306748	0.443206	0.237968	0.280342	0.351377	0.256874	0.203779	0.446742	0.348793	0.676661	0.221105	0.396039	0.537317	0.635577	0.307366	0.341372	0.504942	0.435386	0.19043	0.303752	0.212915	0.366597	0.305616
3377	Cer/NS(d17:1/16:0)	0.895202			524.504	431.436	0.0642044	0.142222	0.0977173	0.118275	0.071757	0.158593	0.102345	0.21321	0.271568	0.137436	0.188483	0.207835	0.254272	0.249822	0.235488	0.31409	0.162848	0.107548	0.259933	0.253098	0.180537	0.219559	0.121808	0.123743	0.113324	0.210431	0.144164	0.131398	0.133618	0.143061	0.166399	0.188438	0.248811	0.24679	0.115467	0.121477	0.247592	0.136355	0.184826	0.0985172	0.207562	0.165167	0.198196
9703	TAG(18:0/18:0/20:6)	0.894428			929.756	710.91	1.62603	1.40064	2.44781	3.29015	1.44308	1.29399	1.8198	1.29699	2.4987	2.77935	1.89982	1.69355	2.63605	2.44767	1.18249	1.48703	1.13368	1.75753	1.55566	1.32893	1.85095	2.99603	1.64822	1.33782	2.30103	1.42834	1.44433	2.51382	1.34044	3.06474	1.13886	2.35771	3.16983	2.80726	1.25269	2.56467	2.00776	2.82407	1.29226	2.01264	0.801195	2.01519	1.30789
9965	TAG(18:2/20:3/20:3)	0.894304			953.754	703.48	0.905036	2.07286	1.51479	1.48881	1.31104	1.12532	1.47176	1.15109	2.77259	2.78585	3.29222	1.99684	1.8906	1.42691	0.932487	0.92575	1.05505	1.6979	1.18036	1.12713	1.60622	2.154	1.33703	1.90223	1.67235	1.53799	1.44766	2.91041	1.70559	3.13677	1.10304	1.94976	2.81855	2.38681	1.48767	1.74443	2.12379	1.84179	1.03842	0.898744	1.27093	1.8234	1.49157
8946	TAG(16:1/18:1/18:1)	0.893443			879.731	696.96	0.626771	0.358231	0.801381	1.05295	0.405299	0.479901	0.441342	0.515631	0.815501	1.7272	0.72727	1.31959	0.938572	0.802527	0.68493	1.29423	0.804582	1.47255	0.667606	0.584144	0.82601	0.545089	0.235637	0.284127	0.474635	0.519471	0.295431	0.359943	0.636205	0.897062	0.450753	0.547431	0.546487	0.599198	0.307909	0.634471	0.541976	0.637186	0.722661	1.63128	0.708748	0.578785	0.759752
9984	TAG(18:1/20:3/20:3)	0.890668			955.769	716.881	0.425495	1.32203	0.811949	1.51804	1.10996	0.585935	1.43587	1.15696	1.79711	1.94498	3.29416	0.750668	2.38075	1.72899	0.532359	0.424906	0.729672	0.608408	1.18377	1.17087	1.24564	1.32685	1.37613	2.0072	0.958997	0.531406	0.631653	1.32372	1.01816	1.70659	0.567355	1.7434	2.97036	1.14682	1.63808	1.00799	2.0846	1.08546	0.665043	0.484685	0.668076	1.24713	0.902237
7941	TAG(16:0/16:0/16:1)	0.890504			827.708	709.519	0.529149	0.38382	0.297114	0.627341	0.272947	0.299398	0.379627	0.716111	0.698531	0.476291	0.371112	1.35165	2.77419	1.00633	0.850786	1.09281	0.523108	0.699567	0.40976	0.4865	0.712307	0.446162	0.590713	0.23036	0.594872	0.560726	0.258263	0.36893	0.44398	0.516926	0.310881	0.524955	0.62231	0.412711	0.255885	0.511369	0.443827	0.363027	1.06968	2.06379	0.485623	0.55375	0.680443
9656	TAG(16:0/20:4/20:4)	0.88976			925.725	685.325	1.1686	1.18002	1.40637	1.51703	0.446215	0.973923	1.16085	0.805772	2.37167	2.9435	2.72315	2.2639	1.27582	1.63671	0.685696	1.25499	0.86152	1.39172	0.889688	0.81283	1.3885	2.11387	0.979365	1.40419	1.07119	0.915877	1.06455	1.78137	1.5625	2.95192	1.07749	1.98544	1.9338	2.68288	1.31957	1.6746	2.08856	1.7408	1.0973	1.49486	1.1853	1.60627	1.40408
9472	TAG(18:0/18:0/18:1)	0.889398			911.803	760.872	0.278645	0.146718	0.245137	0.288245	0.155297	0.144529	0.115117	0.154917	0.194867	0.305046	0.172509	0.437831	0.292582	0.219534	0.135582	0.268951	0.142286	0.206005	0.121388	0.11875	0.207197	0.298848	0.139136	0.152481	0.170834	0.159331	0.137505	0.160457	0.192551	0.189008	0.1075	0.172924	0.222303	0.217103	0.0942578	0.232698	0.162855	0.16723	0.17855	0.348155	0.160476	0.18321	0.202115
8940	TAG(16:0/16:0/20:3)	0.889148			879.739	713.712	6.34087	3.26173	6.36987	8.63866	3.86052	3.54944	2.9712	4.74487	8.22149	14.8062	7.02864	13.0373	12.3098	8.19075	6.80289	13.2348	7.99663	14.0968	6.17749	5.68872	7.86644	4.78046	2.96048	2.17652	4.71505	5.73765	2.5544	3.75265	4.34106	7.72737	3.33855	4.31981	4.72161	5.13534	2.64825	5.41689	3.84806	4.37954	7.47075	17.7654	6.76983	5.22798	6.24243
10467	TAG(20:2/20:2/22:7)	0.887081			1003.76	677.567	0.0243262	0.181347	0.0708244	0.0329147	0.0369016	0.0288312	0.103551	0.0939873	0.219581	0.306616	0.36848	0.0587768	0.223217	0.166435	0.0800202	0.0348891	0.0494855	0.0776857	0.0473214	0.0547148	0.112995	0.130183	0.0713767	0.199877	0.111132	0.0530362	0.0518879	0.136333	0.0790657	0.0807747	0.0491167	0.0700111	0.211128	0.168949	0.29571	0.0908052	0.120544	0.104894	0.0909933	0.0183941	0.0862107	0.111021	0.12329
9679	TAG(18:2/18:2/20:3)	0.886265			927.73	674.5	0.00822875	0.113667	0.10713	0.178292	0.0561506	0.0848393	0.08087	0.0551609	0.132879	0.223825	0.199983	0.0582307	0.119404	0.0833796	0.0442499	0.0867668	0.0521121	0.0816917	0.0786574	0.0663194	0.0955919	0.139238	0.077462	0.0906529	0.0918246	0.00335115	0.0608827	0.119301	0.11023	0.190331	0.0523929	0.117994	0.146917	0.182237	0.0942296	0.10484	0.217507	0.199862	0.0513684	0.107006	0.068637	0.111313	0.105776
10008	TAG(18:1/18:1/22:4)	0.885233			957.775	697.676	0.116885	0.00473194	0.246918	0.201032	0.164594	0.0759614	0.00483814	0.0836424	0.150024	0.408994	0.007166	0.244283	0.163231	0.142692	0.120539	0.236877	0.149311	0.281363	0.131437	0.103561	0.151904	0.0240563	0.0440403	0.019808	0.260198	0.0972814	0.140688	0.00834525	0.00424887	0.132892	0.0682472	0.215906	0.0714344	0.00308074	0.00799989	0.223089	0.00471333	0.299026	0.124026	0.36732	0.127157	0.112178	0.132736
7336	TAG(14:0/16:0/16:0)	0.884932			796.737	707.898	0.177641	0.1833	0.144817	0.268608	0.10853	0.15205	0.188263	0.35511	0.280457	0.292766	0.15183	0.559063	1.30176	0.402305	0.313743	0.479465	0.142558	0.629824	0.154135	0.216873	0.325155	0.246099	0.361734	0.121176	0.261381	0.203448	0.11977	0.190922	0.214377	0.299831	0.123839	0.325587	0.293216	0.197332	0.115079	0.221384	0.239189	0.200424	0.177876	1.93765	0.166659	0.300848	0.390169
10024	TAG(18:0/18:0/22:5)	0.884677			959.88	713.964	0.228155	0.126905	0.251901	0.323158	0.129378	0.149367	0.128015	0.210328	0.337948	0.5683	0.287397	0.526586	0.440214	0.303078	0.287596	0.501015	0.329154	0.564758	0.260244	0.224704	0.30891	0.188499	0.114698	0.091613	0.166389	0.215031	0.114105	0.126389	0.186548	0.255067	0.149376	0.167506	0.217666	0.189464	0.112582	0.201093	0.165035	0.176191	0.283868	0.566002	0.256016	0.197157	0.247853
9986	TAG(18:1/18:1/22:5)	0.883428			955.761	689.96	0.130323	0.305754	0.229053	0.208679	0.128245	0.127286	0.186269	0.170287	0.23275	0.311314	0.433814	0.102261	0.347534	0.229128	0.146233	0.124195	0.0674657	0.0966674	0.149782	0.163629	0.194533	0.340073	0.166715	0.185908	0.275253	0.144333	0.0260459	0.274826	0.165848	0.35484	0.110145	0.225956	0.440963	0.261958	0.286592	0.205489	0.287092	0.245964	0.155331	0.0734661	0.174444	0.220062	0.227223
5136	Cer/NS(d19:1/24:0)	0.880455			664.658	618.714	0.0455425	0.158899	0.115314	0.220075	0.271291	0.286104	0.229799	0.190442	0.284373	0.173923	0.349001	0.257356	0.469588	0.456963	0.377097	0.661962	0.241661	0.160382	0.136596	0.279201	0.268278	0.241207	0.293108	0.235173	0.251546	0.312549	0.268839	0.306344	0.348141	0.204615	0.317517	0.158207	0.59139	0.26975	0.130259	0.219101	0.449273	0.369114	0.415103	0.0928537	0.220507	0.28473	0.28922
7610	PMeOH(16:1/26:4)	0.880123			810.599	516.5	6.15383	5.965	5.53624	5.8236	4.80684	6.01502	5.08869	6.13797	6.80672	4.97962	6.7936	5.68679	6.00882	7.61247	0.147179	6.45902	6.50115	5.08921	6.06566	6.0587	5.68681	8.07538	3.98197	6.66251	4.92498	7.8523	5.26666	4.77521	5.4246	7.18701	6.49067	5.10454	8.71708	6.27388	5.60331	5.45483	7.3181	6.13413	7.18748	4.35655	0.195488	5.84933	4.98318
9282	TAG(17:1/17:1/20:5)	0.878903			899.709	676.304	0.191755	0.341634	0.18944	0.346287	0.118689	0.193618	0.185735	0.133008	0.374172	0.195272	0.306907	0.393419	0.327017	0.309853	0.115155	0.179045	0.191063	0.265122	0.114857	0.089847	0.228095	0.428949	0.153033	0.149714	0.317835	0.185737	0.203355	0.341943	0.331508	0.691811	0.121438	0.426323	0.387498	0.523559	0.210436	0.37557	0.366038	0.40779	0.246579	0.26224	0.160569	0.314596	0.226141
11906	CL(14:0/22:4/14:0/22:4)	0.878316			1467	580.716	0.0790118	0.345536	0.233038	0.364282	0.31916	0.51526	0.328796	0.343294	0.329123	0.492416	0.373596	0.179177	0.218142	0.507418	0.382938	0.445092	0.272837	0.229525	0.349531	0.465298	0.338674	0.63627	0.261506	0.394574	0.255305	0.280809	0.298126	0.336001	0.424456	0.364578	0.384961	0.404794	0.540814	0.362405	0.253796	0.34218	0.694986	0.565645	0.429066	0.189102	0.379446	0.389941	0.376327
8031	PC(12:0/27:0)	0.876572			832.655	530.776	0.151494	0.153597	0.17171	0.220189	0.0993803	0.112236	0.131945	0.208825	0.148327	0.196165	0.164251	0.164153	0.265238	0.174839	0.146216	0.227366	0.145658	0.172211	0.228975	0.187004	0.173489	0.220749	0.127493	0.138857	0.100992	0.16155	0.102156	0.115738	0.0763333	0.149522	0.154038	0.0838854	0.102926	0.166886	0.108861	0.0730818	0.180828	0.10153	0.143063	0.127558	0.200866	0.131846	0.165597
9047	TAG(12:0/20:0/20:0)	0.875997			885.783	789.329	0.00394865	0.00745483	0.000863284	0.0105101	0.018737	0.00706411	0.00305045	0.0110376	0.000598528	0.0019181	0.000692782	0.000423035	0.0014593	0.000403456	0.021216	0.00815752	0.00487058	0.0141493	0.0111982	0.010702	0.00692274	0.00776003	0.00353109	3.55792e-05	0.000215296	0.00200172	0.000886075	0.00629398	0.0109478	0.000666036	0.000673812	0.00858002	0.00229652	0.000902	0.00278203	0.0217604	0.0159167	0.00639276	0.00063913	0.00390928	0.000264265	0.00482272	0.00571471
9013	TAG(12:1/20:0/20:0)	0.875997			883.806	779.656	0.00313948	0.00787894	0.000974091	0.008448	0.0118952	0.00148561	0.00176574	0.00306514	0.000301047	0.00152443	0.000494102	0.000938226	0.00106094	0.000420333	0.0139968	0.00624214	0.004739	0.0114861	0.00844317	0.00882792	0.00485632	0.0174253	0.00244664	0.0015896	0.000901473	0.00154203	0.000164233	0.00683105	0.0111444	4.01253e-05	0.000374865	0.00691598	0.00258322	4.08225e-05	0.000943139	0.0201771	0.00822611	0.00340334	0.000525983	0.00712697	0.000285412	0.00463438	0.00416955
9820	TAG(12:1/22:0/22:0)	0.875997			939.834	775.456	0.0574359	0.0347495	0.0554936	0.0605306	0.0299347	0.0313962	0.0221047	0.0458579	0.0390615	0.0647085	0.033226	0.148756	0.0494535	0.0431408	0.0235732	0.0524202	0.0310401	0.047827	0.0249893	0.0278458	0.0461772	0.0512671	0.0432834	0.0287586	0.0364859	0.0382825	0.0268624	0.0370673	0.0435701	0.0781777	0.0241407	0.0391386	0.0474542	0.0577368	0.0270427	0.0428375	0.0323177	0.0345639	0.0289623	0.0772841	0.025375	0.0410304	0.0512099
10068	TAG(14:1/22:1/22:1)	0.875997			963.834	764.174	0.138946	0.0884634	0.113736	0.132414	0.063336	0.0601127	0.0586329	0.0583675	0.0828454	0.156897	0.0876915	0.141572	0.0951949	0.108187	0.0665538	0.0711917	0.0731691	0.0843803	0.0806584	0.0668616	0.0914605	0.136275	0.0521969	0.071596	0.101495	0.0838968	0.0586858	0.0999567	0.109423	0.21584	0.0459289	0.0820323	0.125726	0.172786	0.0741365	0.151219	0.0786975	0.10778	0.0547016	0.114449	0.0694284	0.100313	0.117167
8493	TAG(12:1/19:0/19:0)	0.875997			855.776	763.914	0.0193462	0.0498111	0.0115249	0.0397607	0.044953	0.0255852	0.0151304	0.0450014	0.0100019	0.0195679	0.0103638	0.0112406	0.0148787	0.00966917	0.0708496	0.0331788	0.0216871	0.0491322	0.0308635	0.03646	0.0284503	0.0608326	0.0192813	0.0163196	0.00768936	0.0190632	0.0108216	0.0309528	0.00676344	0.0127072	0.00995661	0.0426969	0.0293936	0.0110817	0.0182213	0.0149896	0.00880136	0.0217307	0.0160097	0.0364769	0.0139239	0.0203857	0.0266549
9799	TAG(12:0/22:1/22:1)	0.875997			937.816	761.993	0.15459	0.118594	0.140249	0.175374	0.0776708	0.0836402	0.0637456	0.101492	0.104343	0.207147	0.103314	0.196615	0.144133	0.131286	0.0614061	0.141495	0.0885598	0.122238	0.0667868	0.0728514	0.117777	0.181287	0.1057	0.0732711	0.100965	0.124012	0.0852398	0.158893	0.100637	0.21698	0.0554897	0.127181	0.130907	0.223982	0.0768999	0.103687	0.100508	0.116476	0.0969613	0.211242	0.0857181	0.123802	0.0954692
9185	TAG(13:1/20:1/20:1)	0.875997			893.79	757.102	0.0403043	0.0548117	0.0283902	0.0669014	0.0330902	0.0330226	0.0483339	0.0247026	0.0471891	0.0741337	0.067844	0.0184609	0.0547377	0.0506882	0.0222353	0.0463471	0.0299802	0.0426471	0.0339755	0.0283185	0.0423057	0.0981912	0.0348817	0.0581248	0.0305627	0.0321863	0.0201018	0.0613301	0.0590735	0.0631455	0.0244852	0.0338361	0.0839814	0.0580461	0.0300163	0.0375972	0.0352394	0.0431513	0.0430967	0.0762111	0.0397969	0.0481528	0.0380908
10308	TAG(16:1/22:2/22:2)	0.875997			987.832	753.259	0.195568	0.105319	0.230468	0.130799	0.0765894	0.0921774	0.0570978	0.100539	0.112058	0.298487	0.123235	0.279595	0.106542	0.105918	0.0799991	0.0788676	0.0750285	0.0949689	0.110645	0.0714853	0.126269	0.169915	0.0579417	0.0584863	0.215005	0.0714358	0.0731587	0.140049	0.119546	0.252339	0.0637828	0.113747	0.157109	0.211792	0.0954507	0.176979	0.118252	0.117174	0.0728544	0.0881926	0.0565624	0.121489	0.12038
9966	TAG(14:0/22:4/22:4)	0.875997			953.761	753.068	0.180307	0.293649	0.186682	0.293118	0.304104	0.312237	0.174205	0.343587	0.292348	0.243279	0.1676	0.178694	0.270218	0.175049	0.319875	0.309264	0.317343	0.184228	0.197298	0.311723	0.25274	0.164264	0.272273	0.268415	0.160539	0.302891	0.304979	0.257478	0.2702	0.282697	0.194997	0.289825	0.587825	0.307244	0.309046	0.269146	0.196243	0.295437	0.267004	0.142946	0.318861	0.273115	0.166923
10043	TAG(14:0/22:2/22:2)	0.875997			961.816	752.497	0.358897	0.173663	0.395372	0.220146	0.169548	0.174231	0.143068	0.143637	0.25939	0.518328	0.191512	0.314022	0.212091	0.232421	0.0957464	0.124067	0.142737	0.176863	0.167223	0.0978058	0.215538	0.400873	0.0775137	0.244714	0.234744	0.127212	0.117827	0.27626	0.254296	0.474766	0.110512	0.28583	0.314308	0.460958	0.223517	0.445066	0.19335	0.184819	0.201784	0.186689	0.131113	0.247308	0.198696
10256	TAG(15:1/22:0/22:0)	0.875997			981.864	739.555	0.318589	0.225017	0.401939	0.256554	0.134141	0.288435	0.143324	0.164133	0.26684	0.666972	0.326718	0.304023	0.284483	0.240017	0.150773	0.233468	0.233037	0.188138	0.340769	0.224352	0.269586	0.407686	0.118703	0.198284	0.328284	0.123217	0.143038	0.297034	0.237547	0.821041	0.119458	0.22402	0.347609	0.607435	0.195292	0.60143	0.266074	0.262166	0.172435	0.32069	0.159386	0.297541	0.237885
10019	TAG(14:1/22:2/22:2)	0.875997			959.802	738.616	0.511625	0.679712	0.922347	0.650087	0.42341	0.452887	0.305686	0.293634	0.538083	1.37621	0.606485	0.653047	0.591681	0.606093	0.243004	0.272745	0.274155	0.363423	0.37314	0.261656	0.519955	1.03162	0.347884	0.407256	0.796143	0.277546	0.445484	0.787761	0.652979	1.19095	0.254008	0.590093	0.627872	0.889832	0.354873	0.831944	0.582992	0.662455	0.336452	0.350054	0.347354	0.588278	0.458536
8753	TAG(13:1/19:0/19:0)	0.875997			869.754	736.445	0.0990379	0.0853551	0.099322	0.170468	0.0951012	0.0823014	0.0588621	0.103657	0.139123	0.176209	0.086536	0.30538	0.401197	0.147855	0.130288	0.354498	0.0850854	0.187508	0.0839937	0.0694889	0.148063	0.141365	0.111065	0.0660569	0.100481	0.119633	0.0562326	0.0731914	0.0669774	0.173912	0.0577469	0.101098	0.101394	0.0894272	0.0499746	0.0954226	0.0923886	0.0600716	0.163274	0.264995	0.103933	0.104432	0.140815
9768	TAG(12:1/22:1/22:1)	0.875997			935.789	735.232	0.148185	0.201674	0.204368	0.204361	0.104485	0.0837738	0.0891928	0.0770378	0.149855	0.416415	0.16054	0.324932	0.171531	0.210521	0.0861464	0.0908573	0.0888166	0.148078	0.10202	0.0739862	0.156839	0.353594	0.0779571	0.0945429	0.239346	0.111763	0.109453	0.262322	0.1366	0.373379	0.0643209	0.140589	0.153999	0.162489	0.10851	0.24904	0.126215	0.277837	0.154188	0.169571	0.121518	0.174362	0.137004
9255	TAG(13:1/20:0/20:0)	0.875997			897.731	729.567	0.153755	0.114822	0.132457	0.199485	0.0993064	0.105666	0.0960615	0.171758	0.188505	0.259156	0.173631	0.409241	0.328422	0.270872	0.202418	0.305625	0.19266	0.3241	0.154284	0.192241	0.203723	0.132754	0.0853111	0.0695949	0.130324	0.15994	0.0839062	0.0948699	0.116832	0.183203	0.115568	0.111348	0.132923	0.135527	0.0991664	0.139924	0.148685	0.113735	0.260064	0.351451	0.243646	0.145439	0.216256
10244	TAG(15:0/22:1/22:1)	0.875997			979.849	727.697	0.466696	0.371566	0.460995	0.359777	0.189739	0.19543	0.23762	0.290299	0.883358	1.85461	0.499463	0.0248135	0.604688	0.442033	0.216115	0.214303	0.214092	0.325422	0.234881	0.203508	0.41447	0.445074	0.178462	0.253284	0.574377	0.201601	0.215951	0.518579	0.343207	0.697122	0.152717	0.345046	0.715642	0.464512	0.354411	0.464961	0.327522	0.814512	0.216128	0.230181	0.225317	0.38693	0.331321
9969	TAG(13:1/22:0/22:0)	0.875997			953.835	724.61	1.13815	1.15369	1.83925	1.69516	0.901152	0.578259	0.639592	0.593711	1.16752	2.69435	2.68225	1.0721	1.51991	1.17488	0.551652	0.889977	0.826166	1.3615	0.648295	0.829258	1.19784	1.52064	0.879855	0.872956	1.7358	0.800921	0.857426	1.889	1.6277	1.87363	0.434641	0.967652	2.1701	1.19132	0.921654	1.21556	0.978776	1.83602	0.728949	0.85527	0.760816	1.20593	0.947734
8712	TAG(13:0/19:1/19:1)	0.875997			867.738	720.783	0.15943	0.106885	0.120177	0.209238	0.114873	0.11822	0.0875765	0.167597	0.214516	0.22831	0.134657	0.407827	0.556165	0.22679	0.212903	0.489162	0.157633	0.34799	0.143246	0.123195	0.21632	0.187661	0.140541	0.0730747	0.121547	0.177203	0.0870306	0.0953216	0.111864	0.188005	0.0791687	0.12609	0.157188	0.109718	0.0658948	0.146468	0.138017	0.105561	0.260167	0.461539	0.179429	0.150574	0.189166
10255	TAG(16:0/22:4/22:4)	0.875997			981.784	720.764	0.19802	0.510218	0.470432	0.29286	0.292624	0.346065	0.389788	0.282851	0.682244	1.03994	0.707613	0.527876	0.559419	0.455974	0.271464	0.17827	0.265587	0.367248	0.257224	0.320568	0.420814	0.591151	0.299318	0.440072	0.494591	0.256545	0.325437	0.585859	0.383567	0.744011	0.262996	0.440726	0.944054	0.579657	0.374221	0.424762	0.429712	0.518046	0.275951	0.192574	0.303356	0.44333	0.376365
10230	TAG(15:1/22:1/22:1)	0.875997			977.835	720.689	0.288397	0.781563	0.755527	0.503108	0.371038	0.362237	0.524342	0.401338	0.91437	1.96703	0.933397	0.808175	0.739406	0.838243	0.31554	0.263927	0.361872	0.596356	0.370427	0.348611	0.622245	1.00984	0.370501	0.455567	0.802146	0.380175	0.371755	0.979537	0.50765	1.16775	0.31701	0.654054	1.02978	0.889487	0.444425	0.751505	0.638895	0.776274	0.443797	0.365709	0.504697	0.643028	0.631053
8228	TAG(13:1/18:0/18:0)	0.875997			841.724	719.119	0.0939101	0.087532	0.0735431	0.096018	0.0561698	0.0762615	0.0581417	0.176979	0.121326	0.145733	0.0527212	0.220052	0.446965	0.135181	0.135201	0.267753	0.0724492	0.199378	0.0784958	0.103854	0.134883	0.100941	0.234208	0.0525711	0.0907782	0.101913	0.0603636	0.0911059	0.0643691	0.0957611	0.0580634	0.0836996	0.119855	0.0876885	0.0495303	0.0701773	0.0849357	0.065547	0.159328	0.236292	0.107153	0.100714	0.15267
7717	TAG(13:0/13:0/21:0)	0.875997			815.702	716.928	0.0865473	0.319375	0.20562	0.273565	0.29217	0.281034	0.265766	0.278158	0.333597	0.375493	0.326483	0.264922	0.606088	0.390066	0.302029	0.324269	0.289598	0.255169	0.270341	0.43664	0.308847	0.341847	1.00893	0.303771	0.279673	0.298318	0.268092	0.331175	0.36937	0.267125	0.303016	0.272232	0.548255	0.374797	0.364076	0.260792	0.374259	0.356242	0.351205	0.272107	0.25425	0.359977	0.316415
8265	TAG(13:0/18:0/18:0)	0.875997			843.683	708.798	0.0113566	0.0046852	0.0931333	0.0097672	0.0125424	0.0145616	0.00691718	0.0184862	0.01406	0.00668901	0.0342085	0.0441455	0.0836785	0.0212105	0.0279027	0.032909	0.0168128	0.0486739	0.00809745	0.0172083	0.0263523	0.0119108	0.0137895	0.00873235	0.0157055	0.0137665	0.0171768	0.0177787	0.0126363	0.00638323	0.0144031	0.0114331	0.0203771	0.00916357	0.010753	0.0160734	0.0154545	0.019506	0.0335569	0.0670199	0.012412	0.0174016	0.0133306
8899	TAG(12:0/20:2/20:2)	0.875997			877.727	708.518	0.462776	0.891342	1.1421	1.52941	0.727328	0.798258	1.20042	0.745785	1.17036	1.28881	0.872356	1.649	2.41853	0.746203	0.609381	2.16889	1.06723	2.65853	0.682056	0.608563	1.17187	0.79585	0.695593	0.866519	1.17532	0.72917	0.583764	1.05904	1.2802	2.03323	0.855667	1.49534	1.38073	1.21286	0.557444	1.17978	1.09792	1.18391	1.27281	2.91581	0.689764	1.15304	0.947312
7433	TAG(12:0/12:0/22:0)	0.875997			801.693	707.757	0.126631	0.132027	0.0895687	0.142989	0.086931	0.117568	0.139884	0.263663	0.170479	0.14167	0.0987148	0.2654	0.622851	0.258472	0.223797	0.293364	0.102868	0.331549	0.120986	0.172213	0.195081	0.160352	0.278329	0.0905257	0.17516	0.140083	0.0949476	0.122486	0.150945	0.158548	0.104346	0.202023	0.229819	0.129869	0.0879664	0.147589	0.167207	0.132907	0.276865	0.849526	0.117884	0.190869	0.234568
10206	TAG(15:0/22:2/22:2)	0.875997			975.819	706.998	0.313627	0.95834	0.628303	0.977939	0.441978	0.31767	0.794056	0.520412	1.45144	2.6386	1.90752	1.11594	1.43357	0.941947	0.496284	0.389921	0.681223	0.687708	0.510618	0.460247	0.883367	1.14627	0.527691	1.21684	0.73853	0.429527	0.538157	1.04981	0.876701	1.53196	0.470852	0.782646	1.23027	1.06783	0.852407	0.827836	0.897996	0.971174	0.566936	0.475965	0.626433	0.841292	0.813459
9283	TAG(13:0/20:0/20:0)	0.875997			899.788	703.895	1.72593	0.190629	1.84022	3.33613	0.833785	0.954432	1.09912	0.826612	1.9111	2.51143	2.61053	3.07763	2.23378	2.24998	1.06734	2.3306	1.29711	2.73426	1.30947	0.746165	1.74431	2.13409	0.803682	0.707096	1.94174	1.24154	0.781615	1.28149	1.42222	6.60334	0.689668	3.38064	1.43972	1.89144	0.273936	0.246178	0.298203	0.417718	1.27766	4.34565	1.44957	1.63136	1.67099
9953	TAG(13:0/22:1/22:1)	0.875997			951.816	696.089	0.363323	0.605268	0.56956	0.786738	0.294672	0.3124	0.411448	0.280614	0.910853	1.15341	1.00162	0.835934	0.68331	0.594956	0.309647	0.493261	0.304319	0.476083	0.396843	0.288882	0.553657	0.767859	0.322991	0.51811	0.579284	0.403437	0.290329	0.692693	0.583539	1.26618	0.268358	0.65128	0.774756	0.953128	0.392649	0.562422	0.850002	0.784677	0.435405	0.308864	0.445212	0.592559	0.555634
8872	TAG(12:1/20:2/20:2)	0.875997			875.783	695.154	0.396035	0.19877	0.385139	0.691887	0.175993	0.222396	0.225705	0.304989	0.613413	1.38664	0.49719	1.12965	1.10956	0.648358	0.440465	0.899929	0.465457	1.20644	0.371973	0.315622	0.584281	0.300782	0.182112	0.095324	0.274654	0.344469	0.142757	0.231829	0.348818	0.504408	0.0934139	0.304539	0.259194	0.343137	0.167412	0.339271	0.299673	0.143389	0.561397	1.59465	0.426095	0.347866	0.4679
10435	TAG(17:0/22:3/22:3)	0.875997			999.819	694.757	0.0861318	0.647203	0.267973	0.138576	0.107961	0.107192	0.47415	0.216056	1.12351	1.25807	1.02956	0.79509	0.660437	0.679537	0.211339	0.118306	0.146693	0.424008	0.287453	0.195122	0.448719	0.418314	0.187305	0.511578	0.299892	0.156179	0.250654	0.393824	0.223073	0.37473	0.163604	0.271879	0.474834	0.517042	0.477359	0.495579	0.618477	0.639452	0.231258	0.112384	0.214086	0.351575	0.331702
8448	TAG(12:0/19:1/19:1)	0.875997			853.715	694.276	0.181935	0.106329	0.103696	0.236709	0.0823546	0.0840953	0.100857	0.154747	0.232928	0.229556	0.142475	0.412275	0.516982	0.269009	0.189083	0.315503	0.196515	0.209152	0.144761	0.133402	0.202118	0.130128	0.0932535	0.045552	0.136564	0.154998	0.0681704	0.0995914	0.133797	0.178753	0.0841935	0.1291	0.159434	0.125075	0.0762252	0.14655	0.121233	0.113866	0.276307	0.536062	0.161971	0.148541	0.169994
10678	TAG(20:1/22:6/22:6)	0.875997			1027.85	694.251	0.0209782	0.117229	0.0707895	0.0267309	0.0143474	0.0169383	0.0803861	0.0534809	0.203998	0.302366	0.295582	0.111598	0.174468	0.114731	0.0532259	0.0145365	0.0207186	0.0570797	0.0526049	0.052479	0.0927135	0.121105	0.0309849	0.163664	0.0906676	0.0345409	0.0414655	0.115383	0.0508586	0.0913424	0.0559564	0.0609073	0.13624	0.142161	0.13059	0.0730586	0.0933903	0.0922941	0.0600543	0.00992433	0.0507279	0.0822657	0.111613
10466	TAG(18:1/22:5/22:5)	0.875997			1003.77	693.36	0.096467	0.391042	0.247663	0.0864273	0.160871	0.152373	0.410357	0.256976	0.582971	0.854036	1.17965	0.327528	0.855697	0.404075	0.243309	0.0963535	0.168807	0.253147	0.176356	0.189358	0.356673	0.454011	0.279309	0.592251	0.3059	0.155787	0.151584	0.389874	0.289166	0.298309	0.217425	0.209389	0.749046	0.540031	0.803729	0.335371	0.458326	0.429	0.35074	0.0628548	0.252669	0.366239	0.307939
7909	TAG(12:0/18:1/18:1)	0.875997			825.691	692.119	0.360203	0.238653	0.191427	0.414585	0.161895	0.22277	0.261499	0.50063	0.48428	0.364499	0.217822	0.95142	0.726798	0.355417	0.495438	0.722999	0.351567	1.00922	0.256099	0.304662	0.429594	0.306257	0.388347	0.12288	0.347772	0.365587	0.162303	0.2306	0.300545	0.384382	0.181535	0.320858	0.414871	0.248331	0.154816	0.329021	0.336567	0.261341	0.721286	1.64738	0.296542	0.376061	0.455199
7386	TAG(12:0/12:0/22:1)	0.875997			799.678	689.537	0.0968857	0.0831194	0.0662361	0.0909788	0.0320827	0.0800018	0.0846787	0.253099	0.117775	0.138935	0.0351343	0.267604	0.58552	0.203094	0.152175	0.201204	0.0736424	0.304009	0.0706458	0.127381	0.15321	0.090425	0.295646	0.0495404	0.129146	0.114343	0.053728	0.102665	0.0873485	0.082273	0.0687025	0.0839056	0.136428	0.0797482	0.0464947	0.0830117	0.0926106	0.0752418	0.255555	0.482764	0.0961406	0.125286	0.215911
8638	TAG(13:0/19:2/19:2)	0.875997			863.708	687.297	0.027631	0.0165797	0.0225021	0.0403112	0.0153286	0.0147754	0.0121394	0.0267171	0.0441172	0.0844437	0.0162689	0.0850872	0.0802815	0.0391306	0.0295977	0.108567	0.0405858	0.0789314	0.0302425	0.0192518	0.0416245	0.0374355	0.0129324	0.00635915	0.0149727	0.0233766	0.0123575	0.0111653	0.0216678	0.00657336	0.0095211	0.0125162	0.0214212	0.012827	0.0068987	0.0221798	0.0187692	0.0122927	0.0450269	0.115862	0.0318603	0.0228008	0.0316427
9903	TAG(13:0/22:2/22:2)	0.875997			947.789	686.871	0.559551	1.50176	0.867146	1.20479	0.480508	0.481766	0.978074	0.698885	2.26727	3.56347	3.27255	1.28518	1.86949	1.27221	0.530573	0.680191	0.553749	0.995367	0.706799	0.660768	1.2215	1.56848	0.839875	1.26421	1.10964	0.690868	0.630624	1.67914	1.2317	2.23612	0.539459	1.446	1.25084	1.97232	1.23925	1.3106	1.76696	1.75773	0.643756	0.944862	0.786546	1.24545	1.01245
8371	TAG(12:0/19:2/19:2)	0.875997			849.693	677.231	0.267044	0.169157	0.157605	0.341668	0.103592	0.122587	0.131327	0.18063	0.328722	0.411962	0.198596	0.56999	0.594582	0.339321	0.243939	0.442159	0.256549	0.682132	0.211798	0.176211	0.296479	0.174356	0.0931132	0.0539579	0.162032	0.181024	0.0854904	0.106727	0.214245	0.247976	0.0956286	0.149195	0.181148	0.184993	0.0834612	0.213467	0.162939	0.178551	0.330372	1.13225	0.208537	0.211973	0.263603
10652	TAG(20:0/22:7/22:7)	0.875997			1025.76	672.542	0.0125275	0.139976	0.0498777	0.0161785	0.0305275	0.0219872	0.0928125	0.0837504	0.241598	0.332299	0.290918	0.0566639	0.169562	0.189211	0.0608905	0.0244989	0.0533649	0.0754994	0.0425071	0.0539217	0.101929	0.0933401	0.0759401	0.152831	0.0892963	0.0377548	0.0550404	0.108894	0.0644336	0.0809238	0.0564105	0.0672508	0.152564	0.17693	0.204835	0.0948629	0.102027	0.116234	0.0593761	0.0154904	0.0476498	0.0926042	0.0912075
7353	TAG(12:0/12:0/22:2)	0.875997			797.661	671.303	0.0479466	0.0388941	0.0369779	0.0572602	0.0136957	0.0463011	0.0522701	0.132633	0.0662216	0.101791	0.0219594	0.143985	0.260178	0.113866	0.0642342	0.113662	0.0422932	0.1584	0.0357027	0.0673773	0.0807824	0.0541791	0.144629	0.0197336	0.0631814	0.0659781	0.0298439	0.0557442	0.0521717	0.0642407	0.0293986	0.0553847	0.0782293	0.0467416	0.0217206	0.0492221	0.0575915	0.0497884	0.136323	0.379928	0.0494949	0.0751762	0.114487
9635	TAG(12:1/22:4/22:4)	0.875997			923.71	669.92	0.0502282	0.125761	0.0837309	0.179787	0.0390641	0.0310099	0.0434597	0.0277127	0.268412	0.15777	0.317654	0.261763	0.0868269	0.0967648	0.0346606	0.113142	0.0433975	0.191395	0.0349357	0.0235314	0.11055	0.156504	0.0600391	0.0943766	0.131354	0.0462105	0.0489197	0.170992	0.135599	0.22333	0.060343	0.21507	0.08271	0.292673	0.102317	0.143122	0.139861	0.124125	0.138732	0.326682	0.0912206	0.139209	0.102486
10653	TAG(20:2/22:6/22:6)	0.875997			1025.75	657.377	0.000305121	0.0409812	0.0024353	3.60154e-05	0.00466736	0.000978576	0.0223021	0.0262863	0.0780613	0.0952403	0.116341	0.00737705	0.044145	0.0530531	0.0107985	0.00318049	0.0120174	0.016231	0.00553689	0.00798899	0.0273981	0.0275848	0.0167175	0.100569	0.0136367	0.0121616	0.00723726	0.0277964	0.0223717	0.00793103	0.0181503	0.0175435	0.0332653	0.049884	0.0801951	0.0225189	0.0428732	0.0521216	0.0270913	3.37397e-05	0.0155876	0.0297635	0.0306193
10633	TAG(20:3/22:6/22:6)	0.875997			1023.74	656.817	0.00666203	0.14631	0.0315259	0.00753083	0.0325091	0.0150044	0.101048	0.10723	0.344743	0.359998	0.444271	0.0504174	0.188664	0.22093	0.0646113	0.0282204	0.0525515	0.0622812	0.0351363	0.0497201	0.117468	0.125082	0.0705334	0.370923	0.0598151	0.0361962	0.0538971	0.120935	0.0861275	0.0519052	0.0692492	0.061636	0.134171	0.196654	0.317181	0.0919734	0.161638	0.134979	0.104894	0.0124034	0.0777327	0.116896	0.114153
10410	TAG(18:2/22:6/22:6)	0.875997			997.725	654.58	0.0353033	0.205632	0.0996217	0.0434386	0.0557419	0.0584725	0.116971	0.15333	0.523549	0.593498	0.719674	0.140768	0.173045	0.215446	0.0801992	0.0873974	0.0720925	0.0890468	0.0707672	0.0820868	0.180804	0.20424	0.122168	0.484865	0.0868209	0.0766148	0.092641	0.197491	0.146672	0.144377	0.133351	0.152196	0.200426	0.406	0.286471	0.153856	0.336521	0.260058	0.138737	0.0436878	0.108562	0.188788	0.191551
9901	TAG(14:1/22:5/22:5)	0.875997			947.708	652.916	0.0430553	0.134693	0.0610183	0.0536348	0.0305235	0.0365822	0.0460676	0.059932	0.240844	0.209201	0.222057	0.124033	0.110669	0.0721596	0.0387421	0.0621808	0.0232393	0.0698136	0.0427992	0.0424106	0.0861828	0.0874344	0.0531446	0.0732412	0.0651641	0.0535553	0.0495797	0.119104	0.0793177	0.0967887	0.0256513	0.101182	0.11627	0.190708	0.0858497	0.0593071	0.148438	0.102804	0.074064	0.0335269	0.0497115	0.0832421	0.0715472
8411	TAG(12:1/19:1/19:1)	0.875997			851.696	626.306	0.142012	0.698092	0.254733	0.5236	0.557744	0.591901	0.490584	0.68802	0.588252	0.596469	0.742849	0.394302	0.734956	0.947284	0.466769	0.961599	0.520275	0.313461	0.546549	0.916809	0.583813	1.10225	0.73993	0.738473	0.546452	0.567665	0.704053	0.676139	0.802725	0.433513	0.588916	0.48447	1.11529	0.433941	0.685335	0.379435	1.11158	0.781879	0.609093	0.201938	0.260835	0.648195	0.461527
7588	TAG(13:0/13:0/21:3)	0.875997			809.65	611.899	0.0743421	0.198454	0.135017	0.193049	0.196567	0.332431	0.284721	0.213158	0.256851	0.246865	0.192827	0.138586	0.184628	0.293377	0.142219	0.179825	0.20659	0.155859	0.177746	0.218642	0.201088	0.506135	0.201842	0.244865	0.21183	0.179176	0.221194	0.244047	0.216707	0.218398	0.229659	0.206188	0.441539	0.226221	0.338108	0.210145	0.301488	0.313334	0.23743	0.117044	0.163225	0.251429	0.197538
9379	TAG(15:1/20:5/20:5)	0.875997			905.667	598.953	0.93897	2.76935	2.03657	2.50308	2.87814	2.53805	2.47338	2.78555	3.08555	3.2445	2.60946	1.86482	2.95134	2.78618	2.67645	2.39493	2.32967	1.83968	2.01839	3.34547	2.50348	2.98457	2.30972	2.84713	2.25093	2.0834	2.06446	3.29683	3.5437	2.42818	2.94132	2.81068	4.62345	3.27264	3.29561	2.63333	3.52001	3.52189	3.3652	1.58415	2.07056	2.87239	2.70934
8148	TAG(13:1/18:1/18:1)	0.875997			837.679	598.415	6.31825	24.9219	19.1328	21.0512	29.8566	24.1924	21.5541	30.8173	33.7571	30.9265	30.2579	16.533	25.8943	35.3238	23.2661	24.9	25.7951	19.9516	20.7867	35.2366	25.0237	32.9566	25.0509	31.1246	23.5464	23.1534	21.2575	27.8845	33.7174	22.9136	28.8685	29.6929	44.753	36.0311	32.3191	23.115	32.1766	38.9024	34.0289	13.562	20.7049	28.788	24.3727
8191	TAG(13:0/18:1/18:1)	0.875997			839.688	597.991	0.856404	3.31579	2.68324	2.90035	3.44817	3.42959	2.99393	4.13278	4.05114	4.13696	4.26771	2.15422	3.40779	4.7507	3.281	3.28285	3.33962	2.5811	2.87105	4.68322	3.32838	4.07573	3.26787	4.38442	3.01321	3.17538	2.70147	3.74098	4.72644	3.04951	4.00105	3.89765	5.75044	4.77973	4.2687	3.07892	5.30853	5.01144	4.10228	1.81155	2.91599	3.85307	3.41484
8113	TAG(13:0/18:2/18:2)	0.875997			835.665	595.615	0.131974	0.451891	0.315603	0.382689	0.395472	0.381201	0.417736	0.561288	0.616275	0.230836	0.25676	0.340305	0.459065	0.493141	0.446461	0.40614	0.324904	0.458536	0.41069	0.581117	0.403104	0.495967	0.409677	0.500931	0.296231	0.500659	0.265437	0.451125	0.286581	0.498967	0.266243	0.404476	0.774333	0.714929	0.534153	0.287817	0.653818	0.480186	0.481549	0.240485	0.258595	0.440108	0.422326
7902	TAG(14:3/14:3/21:3)	0.875997			825.672	581.246	0.0978022	0.443366	0.34774	0.433543	0.542888	0.437281	0.472253	0.54291	0.683069	0.536326	0.727009	0.347303	0.52421	0.786571	0.424242	0.506848	0.387252	0.250172	0.40583	0.741876	0.481925	0.859679	0.428437	0.667202	0.437398	0.339207	0.367151	0.467138	0.831292	0.357537	0.705891	0.486777	0.768125	0.494225	0.605589	0.433181	0.762535	0.77712	0.686609	0.200023	0.35337	0.551424	0.470179
9142	TAG(12:3/21:4/21:4)	0.875997			891.652	580.658	0.160278	0.463169	0.317796	0.451828	0.512376	0.424336	0.484938	0.564512	0.594321	0.546298	0.392278	0.365625	0.480003	0.475213	0.427847	0.536635	0.318457	0.319423	0.376093	0.571174	0.43913	0.615131	0.4446	0.510256	0.417389	0.339984	0.410602	0.473503	0.601718	0.385615	0.411413	0.460009	0.847028	0.500226	0.543282	0.389165	0.696294	0.551787	0.650953	0.265186	0.306581	0.491036	0.456156
7944	TAG(12:1/18:0/18:0)	0.875997			827.698	578.926	0.212565	1.20995	0.444306	1.04921	0.484413	0.92081	0.530722	1.08058	1.40871	0.576581	0.687329	0.675462	0.47763	1.37327	0.703091	1.64887	0.46991	0.671789	0.898426	1.39004	0.845683	1.69487	0.883768	0.557841	0.853476	0.993256	0.993967	0.445911	1.19366	0.872828	1.15215	0.90056	1.52732	0.941387	1.06601	0.680513	2.1066	1.3634	1.114	0.201342	0.38853	0.996569	1.01834
6911	TAG(12:0/12:0/20:0)	0.875997			773.651	568.262	0.0517482	0.280502	0.0974423	0.130957	0.229062	0.16835	0.183383	0.235919	0.276179	0.295474	0.412033	0.0978031	0.174522	0.24266	0.294829	0.280342	0.11845	0.246271	0.179237	0.423306	0.220924	0.264849	0.192411	0.286863	0.205798	0.173654	0.158442	0.196695	0.220126	0.156403	0.177982	0.234599	0.316424	0.38652	0.285389	0.141433	0.293082	0.362279	0.40218	0.0675931	0.120847	0.232178	0.213029
7666	TAG(13:0/13:0/21:1)	0.875997			813.683	562.813	6.00632	23.2509	15.5062	21.1573	17.1223	18.6339	18.7338	25.7848	27.4501	21.7342	28.5883	13.3041	21.7536	27.0029	19.5699	22.9024	19.1162	16.6168	18.1476	35.7291	20.9055	30.6552	14.5002	25.5161	15.8089	19.0301	13.8876	21.9977	28.9855	17.5941	26.2827	17.3809	41.7487	37.1902	22.0162	15.7508	39.4305	28.5894	22.1673	8.91314	14.5249	23.0985	22.1572
9343	TAG(15:0/20:6/20:6)	0.875997			903.653	562.807	0.458189	0.881367	0.79831	0.93641	0.892008	0.95263	0.982646	1.20615	1.17853	1.09563	1.20982	0.725534	1.05801	1.1013	1.00577	1.09309	0.973196	0.900736	0.984235	1.40855	0.992105	1.96925	0.825672	1.14397	0.785159	0.919915	0.781793	1.02751	1.17285	0.869601	1.15666	0.92631	3.35338	1.49097	1.12211	0.812188	2.52176	1.20803	0.974646	0.511307	0.823894	1.21985	0.907064
7134	TAG(12:0/12:0/21:1)	0.875997			785.624	560.275	0.229159	0.0720961	0.0588682	0.112645	0.282248	0.104783	0.0353575	0.0591049	0.0581635	0.0736265	0.0788384	0.0261458	0.233492	0.0759573	0.0501119	0.0797451	0.0414339	0.0465416	0.0566024	0.0819596	0.092844	0.0729274	0.0283825	0.0233335	0.0442456	0.0610919	0.05524	0.0519571	0.058687	0.0501674	0.0783125	0.0606154	0.0988495	0.060505	0.0509967	0.0262767	0.102997	0.125149	0.0325711	0.0252157	0.0549038	0.0581213	0.0681358
8593	TAG(13:1/19:2/19:2)	0.875997			861.679	559.982	0.13347	0.747218	0.464614	0.804666	0.525038	0.681568	0.663864	0.620905	0.580974	0.784595	0.773623	0.339056	0.513606	0.873421	0.81386	0.628612	0.740891	0.454584	0.655371	0.78278	0.629136	1.05292	0.566803	0.390249	0.573775	0.584902	0.627978	0.700248	0.777894	0.515046	0.691991	0.588187	1.06531	0.694904	0.778449	0.506964	1.27058	1.05199	0.705384	0.262909	0.543211	0.697485	0.617147
6683	TAG(12:0/12:0/19:0)	0.875997			759.608	556.084	0.0588046	0.165668	0.170141	0.263545	0.128577	0.231503	0.146087	0.180857	0.29885	0.158966	0.162072	0.204785	0.121345	0.192476	0.164151	0.272019	0.137816	0.204092	0.168336	0.257704	0.18439	0.31563	0.150138	0.159406	0.182508	0.260432	0.163405	0.165989	0.194518	0.235324	0.190799	0.18723	0.248188	0.386005	0.142435	0.165509	0.224426	0.246497	0.149693	0.107452	0.190443	0.203301	0.188869
7245	TAG(12:0/12:0/22:5)	0.875997			791.636	553.21	0.019968	0.175463	0.0695142	0.136929	0.173943	0.150305	0.128628	0.191322	0.260711	0.252065	0.210778	0.096043	0.148363	0.311127	0.144611	0.157112	0.155022	0.110058	0.156203	0.240306	0.164423	0.257657	0.177084	0.200361	0.156598	0.212641	0.144428	0.202728	0.182735	0.177511	0.190132	0.200026	0.247623	0.206293	0.122361	0.14452	0.254032	0.221528	0.21913	0.0877736	0.121092	0.186313	0.192647
7629	TAG(13:0/13:0/21:2)	0.875997			811.656	551.659	1.18635	3.23322	2.12717	3.03312	3.2927	3.32887	2.95251	3.38668	3.84654	3.95681	3.725	2.21455	3.17824	4.68903	3.05847	2.89457	3.33027	2.79664	2.83379	3.37071	3.12176	4.52628	3.4334	3.23861	3.24524	3.44422	3.06258	3.56965	3.79262	3.2652	3.3901	3.47712	5.07473	3.08707	3.25652	3.29784	3.91658	4.09114	3.90943	2.12008	2.58166	3.489	2.83932
8065	TAG(13:1/18:2/18:2)	0.875997			833.652	550.034	0.0408725	1.57517	0.150361	1.76278	0.149869	0.66771	1.41831	1.09241	0.740814	0.663268	0.789813	0.411239	1.80097	2.38033	0.576233	0.898413	0.84316	0.154983	0.771256	0.617774	0.875287	0.888345	1.34117	0.57603	1.32084	0.441726	0.129057	0.580506	0.724668	0.644261	0.154236	0.596562	0.214958	0.672368	1.56577	0.460647	1.18651	0.691455	0.99317	0.232077	0.0593242	0.673684	0.46293
7825	TAG(12:0/18:2/18:2)	0.875997			821.649	544.157	0.05741	0.60169	0.407129	0.510914	0.611961	0.479469	0.603592	1.09803	0.633848	0.496474	0.639847	0.675827	0.631541	0.732406	0.750427	1.12903	0.47955	0.38946	0.82412	0.850927	0.630182	0.831481	0.425185	0.73044	0.406693	0.514962	0.397221	0.858418	0.775488	0.550743	0.704271	0.543846	1.83265	0.765003	0.643956	0.462843	1.41122	0.735143	0.677692	0.51937	0.410445	0.709853	0.55369
7352	TAG(14:2/14:2/19:5)	0.875997			797.484	535.048	0.0359962	0.0395734	0.0291295	0.0443042	0.0829353	0.0136478	0.0413743	0.089113	0.0520867	0.0657808	0.077421	0.0727966	0.0817398	0.075013	0.0902315	0.0620026	0.0444297	0.0731877	0.0569764	0.0445326	0.0586136	0.111189	0.0543749	0.0471553	0.0357172	0.0523047	0.014277	0.0187645	0.0908659	0.0436025	0.0754027	0.0334553	0.0398636	0.00381073	0.0217668	0.0479793	0.0159665	0.0309811	0.0864507	0.0689834	0.0725515	0.0482731	0.0612218
7700	TAG(12:1/18:3/18:3)	0.875997			815.635	524.819	0.410435	1.00092	0.492375	1.26534	0.933528	1.03154	0.840093	0.911526	1.12605	1.25371	1.33853	0.73071	0.731407	1.5509	1.00462	1.36528	1.05171	0.720599	0.933847	1.24026	0.996669	2.05349	0.579107	0.814187	0.800341	1.26914	1.07553	1.13269	1.14853	1.25804	0.821679	0.887127	1.499	1.58168	0.933208	0.971859	1.87958	1.52238	1.15865	0.709831	0.705903	1.1401	0.803052
6250	TAG(12:0/12:0/17:0)	0.875997			731.577	521.151	0.811267	1.53273	1.18374	1.80133	1.38507	1.78077	1.3792	1.56579	2.34166	1.55109	1.75826	1.72448	1.32694	2.05313	1.40398	2.26462	1.36471	1.37859	1.63967	2.18387	1.62154	2.93011	1.25178	1.79861	1.35248	1.78432	1.51155	1.57755	1.63005	1.87263	1.61225	1.54921	2.37862	2.43092	1.19202	1.54929	2.45538	2.21058	1.60301	1.14802	1.34825	1.75933	1.58868
6909	TAG(12:1/12:1/21:5)	0.875997			773.624	511.295	0.258478	0.678635	0.328404	0.690295	0.58573	0.731755	0.679397	0.717702	0.823372	0.883962	0.541113	0.45388	0.520815	0.939096	0.87665	0.925374	0.620582	0.653845	0.684621	0.787125	0.669042	1.1448	0.606137	0.9497	0.39599	0.573219	0.511349	0.39646	0.335883	0.677832	0.837879	0.391832	0.477503	0.812687	0.578462	0.527874	0.309036	1.04631	0.542189	0.405839	0.650266	0.608562	0.714129
6514	TAG(12:0/12:0/19:5)	0.875997			749.615	505.575	0.0872949	0.498399	0.328716	0.344447	0.359091	0.382087	0.519589	0.439817	0.588181	0.508391	0.630382	0.24213	0.350272	0.553456	0.605938	0.477523	0.355371	0.428899	0.420086	0.649065	0.438457	0.684292	0.421457	0.541703	0.300533	0.36823	0.291956	0.47042	0.509482	0.35709	0.583397	0.359754	0.632177	0.672757	0.451066	0.323933	0.791396	0.620005	0.71924	0.176753	0.496777	0.488621	0.449151
7302	TAG(14:3/14:3/19:4)	0.875997			795.608	493.07	0.483841	1.94042	2.95355	1.42633	1.44465	1.70976	2.6769	2.68959	3.87583	2.89854	3.39576	2.05243	1.95043	2.53108	2.10874	2.18678	1.6623	1.99588	2.41235	3.56413	2.29796	3.82824	1.45167	2.93417	1.02567	2.29542	1.47907	2.11068	1.54405	2.13861	2.74116	1.81178	3.83851	3.71118	2.54966	1.21062	3.76988	2.22036	2.83005	1.27011	1.69367	2.32273	2.30879
6877	TAG(12:2/12:2/21:4)	0.875997			771.572	491.475	0.12353	0.657493	0.442658	0.661196	0.629183	0.599817	0.689124	0.702859	0.612372	0.507213	0.621594	0.453309	0.604992	0.760805	0.698816	0.683994	0.544815	0.404066	0.595712	0.683455	0.58385	0.762812	0.482023	0.650913	0.489687	0.686831	0.508473	0.674433	0.713219	0.685344	0.715872	0.578957	1.19062	0.687332	0.647692	0.510229	0.872934	0.680114	0.642537	0.28061	0.610014	0.653532	0.650941
6660	TAG(12:0/16:4/16:4)	0.875997			757.553	486.291	0.165536	0.403186	0.363293	0.38102	0.469267	0.237645	0.657204	0.595229	0.319369	0.2617	0.294318	0.340965	0.479575	0.326373	0.382995	0.445484	0.377707	0.370478	0.383731	0.202316	0.37287	0.256588	0.431902	0.342449	0.422107	0.295741	0.327564	0.349829	0.347394	0.337305	0.385879	0.460413	0.787563	0.381007	0.351062	0.302266	0.29709	0.277439	0.375964	0.2771	0.368997	0.368783	0.269899
7577	TAG(12:0/18:5/18:5)	0.875997			809.587	476.241	4.86745	3.28774	3.23809	3.95729	3.57009	4.00337	1.9051	3.13504	3.21288	4.14616	3.84367	3.26344	1.38948	3.65691	3.3167	4.06219	3.32012	3.56897	3.5196	1.91529	3.35898	4.05635	2.89047	1.83716	3.13665	4.87723	3.98549	2.49304	3.69371	3.90111	2.71805	1.47395	6.56264	2.84415	2.7292	3.66327	2.32029	3.30026	3.60312	3.98709	4.182	3.41276	3.05099
6447	TAG(12:1/12:1/19:5)	0.875997			745.555	466.366	5.0616	11.3908	8.31777	11.4698	10.3632	11.6972	12.0552	10.1134	10.2052	13.9709	11.3809	6.64619	9.02246	15.0128	11.1911	13.1655	9.83326	7.02754	11.668	13.7784	10.6686	14.2992	9.2606	10.6696	9.56169	9.02432	11.2655	9.96449	14.1084	10.7636	11.4256	12.6001	17.598	12.0201	9.85304	9.90901	16.6138	17.0255	12.2207	6.05269	13.0394	11.8638	10.1964
6486	TAG(12:1/12:1/19:4)	0.875997			747.563	466.303	0.239312	0.581962	0.396952	0.554798	0.50159	0.590723	0.545472	0.54493	0.493654	0.62392	0.554786	0.345774	0.550894	0.711708	0.575978	0.636688	0.480958	0.295917	0.541269	0.66611	0.52167	0.766926	0.438032	0.526847	0.438015	0.379101	0.100992	0.51602	0.621658	0.538813	0.496084	0.638915	0.885514	0.609029	0.4681	0.530394	0.830224	0.786555	0.607293	0.317532	0.575547	0.55358	0.46295
7669	TAG(12:0/18:4/18:4)	0.875997			813.607	465.293	1.82882	3.46081	3.33981	3.86146	3.5738	5.29782	4.30101	3.68154	5.85181	4.51985	5.23607	3.63854	3.19133	4.78147	3.32097	3.43421	4.73402	4.79457	3.58583	3.68243	4.00581	6.37007	3.07804	4.82329	2.9324	4.11792	3.74363	4.71871	4.58886	4.8857	4.10859	4.27544	10.1327	4.54875	3.71018	4.39866	6.51411	6.40589	3.97477	3.60237	3.27799	4.7104	3.83799
7098	TAG(12:1/12:1/22:7)	0.875997			783.572	464.809	4.60209	4.26448	4.03845	2.10568	3.86345	3.06809	3.43773	2.97539	2.39915	2.39571	2.90498	3.06258	4.86674	3.25171	3.28695	4.5979	2.53671	2.87423	2.7593	2.23806	3.27647	3.4564	2.02801	2.43648	2.61796	2.80275	2.58731	1.90441	0.541154	2.6073	2.5815	3.3647	4.15627	2.97741	2.37827	2.62541	2.01282	1.16585	2.32984	3.77644	4.18901	2.62696	2.12899
7237	TAG(15:2/16:5/16:5)	0.875997			791.537	458.58	0.891697	1.13186	1.02314	1.15032	1.24689	1.40585	1.14557	1.13378	1.37676	1.3301	1.13408	0.943113	0.973235	1.13575	1.02152	1.14179	1.14229	1.09534	1.12457	1.12296	1.13353	1.1114	1.03282	1.05723	1.08815	1.01206	1.23458	0.966855	1.08057	1.30855	1.02354	1.37415	2.467	1.26502	1.06502	1.04447	1.27633	1.18495	0.980045	0.998211	1.08813	1.18295	0.95392
6340	TAG(12:0/12:0/18:4)	0.875997			737.577	458.574	2.23044	6.71297	5.44723	6.24878	5.13879	5.36763	6.05431	7.22848	5.79909	5.35083	6.35502	5.66326	6.9853	7.6746	6.8476	6.66197	6.00298	5.4867	6.19574	6.64343	6.00476	7.19133	5.33149	7.0075	5.72135	5.56648	5.22722	6.3188	7.63599	5.90924	7.96869	6.11316	12.9869	7.85106	6.84357	5.75696	7.36784	6.99579	6.68655	4.34	6.65173	6.77359	6.07731
7076	TAG(12:2/12:2/22:6)	0.875997			781.593	455.605	0.0400859	0.14414	0.103648	0.078878	0.157889	0.121065	0.188235	0.215149	0.272421	0.150617	0.0373725	0.517762	0.613567	0.170227	0.196053	0.254498	0.121714	0.110941	0.16885	0.0994773	0.18813	0.49568	0.2	0.308054	0.0864376	0.200737	0.144605	0.125301	0.0605502	0.0978614	0.149449	0.529857	0.171605	0.218708	0.262913	0.102741	0.399514	0.125098	0.485477	0.68373	0.11694	0.248263	0.118184
6593	TAG(12:0/12:0/19:3)	0.875997			753.588	453.436	2.0538	1.82045	1.38858	2.31029	1.93095	2.30041	1.45806	1.44246	2.5905	2.14524	1.37708	1.63881	1.17307	1.91225	1.25337	1.24243	1.93669	1.46147	1.67548	1.25584	1.71836	2.34145	1.87213	1.07298	2.05958	1.66712	2.31692	1.44417	1.55803	2.0707	1.0434	1.75081	2.87947	1.15053	1.18395	2.03419	2.30585	1.81413	1.75949	2.41295	1.37562	1.80567	1.56642
7267	TAG(14:3/14:3/19:5)	0.875997			793.557	446.861	0.86982	6.04876	6.54249	2.8841	4.5675	6.66518	9.19148	9.74771	10.1236	10.1293	8.49079	6.43794	5.9954	12.2558	8.5808	6.62288	7.62738	4.39827	5.96943	8.99012	7.10693	7.9539	6.20897	12.4354	5.25505	5.31863	4.84062	7.26853	10.502	6.44831	13.457	8.03431	12.173	11.4209	11.067	8.18052	11.8395	10.1306	12.4684	2.43952	7.46134	8.74517	7.92741
7784	TAG(16:5/16:5/17:2)	0.875997			819.571	440.641	0.171637	0.831736	0.824045	0.251676	0.474317	0.51836	1.03915	1.06209	1.40519	1.3559	1.25679	0.735678	0.55993	1.13929	1.2463	0.754886	0.735168	0.794148	0.997397	1.01805	0.858587	1.15075	0.815998	1.89899	0.37179	0.600664	0.663052	0.813867	0.860397	0.776853	1.51728	0.87339	0.99746	1.65212	1.2697	0.845912	1.92695	1.42148	1.87839	0.44452	1.12597	1.09528	1.01685
7546	TAG(12:1/18:5/18:5)	0.875997			807.571	439.974	4.83175	7.14925	5.37067	6.46865	4.30521	5.8606	5.79704	6.35898	6.26148	3.59785	6.45852	5.56739	7.90681	7.40905	6.65019	3.95287	6.84706	6.42418	6.23668	6.00149	5.97279	3.89439	6.07168	5.56035	7.1319	6.59952	6.82542	6.11541	3.83641	6.61527	2.83611	6.8609	12.1979	6.49695	6.75323	6.90147	3.19171	6.86346	7.1395	6.13328	7.42502	6.27249	5.73011
7164	TAG(12:0/12:0/22:7)	0.875997			787.592	437.774	0.803161	3.9887	1.98699	3.3292	3.60073	2.37138	4.95028	4.78919	3.78192	3.66418	5.17207	2.44319	4.79399	5.9106	5.10965	3.72111	4.82829	4.52576	3.08569	4.00896	3.84325	7.51869	3.04283	2.98922	5.62378	3.73686	3.19438	6.60651	6.3116	5.47107	3.03443	5.8263	7.37414	6.14197	5.67637	5.59028	5.26436	4.92495	6.43762	3.48093	3.94572	5.1096	5.27639
7133	TAG(12:1/12:1/22:6)	0.875997			785.588	437.716	15.2581	80.1038	71.1219	67.272	100.052	81.8224	102.566	92.9157	75.7396	112.195	62.9094	50.3137	95.4259	120.237	107.013	73.6463	97.7329	88.3667	102.777	122.962	86.0215	151.072	90.7872	62.9435	110.043	111.022	99.8256	130.746	91.8943	107.948	102.851	80.7511	143.682	122.405	116.464	116.156	95.5323	104.039	127.719	68.6086	124.792	107.964	73.3052
8020	TAG(12:3/19:5/19:5)	0.875997			831.568	418.916	1.42086	1.30758	2.47334	1.01602	1.20629	1.22988	1.37766	1.63939	1.65752	1.12427	1.23765	1.62097	1.62652	1.20393	1.40291	1.12641	1.21628	2.58455	1.32051	1.0788	1.44357	0.938788	1.35672	1.2069	1.14227	1.41653	1.27179	1.19641	1.0672	1.50597	1.30913	1.33142	2.88547	1.52874	1.51454	1.16008	1.21514	0.886577	1.19639	1.17241	1.2809	1.32917	1.12687
8109	TAG(12:1/19:5/19:5)	0.875997			835.601	415.999	0.34716	1.74502	0.706467	0.123634	0.841132	0.63154	1.32281	1.22824	0.538195	1.16005	1.29127	0.700575	2.11834	2.50631	1.07295	0.824711	0.965104	1.21322	0.983943	1.13611	1.07284	1.39455	0.838463	0.866674	1.44287	1.18665	0.920035	1.93963	1.23862	1.20468	0.972347	1.22181	2.99362	1.61939	3.09847	1.1811	1.6866	1.76682	1.952	0.716666	1.28549	1.47632	1.19394
5840	TAG(12:0/12:0/16:5)	0.875997			707.54	408.004	2.42448	9.49313	3.59417	8.1202	4.47162	5.97805	6.64679	9.7112	6.57308	4.12916	7.50558	6.78314	10.952	10.1078	9.7016	13.6985	7.07398	6.82227	6.93127	8.85212	7.47851	14.678	5.69018	6.71495	8.37671	10.9076	7.95941	6.38939	7.77839	7.72121	7.72366	8.45872	14.5884	8.75911	7.13471	7.49228	13.378	8.86288	8.64345	6.60136	6.62638	8.72424	7.72554
7974	TAG(16:5/16:5/18:4)	0.875997			829.553	402.26	0.529321	0.868069	0.942107	0.519618	0.891205	0.975878	0.888571	1.14201	1.30632	1.30067	1.11889	1.63876	1.28237	1.0868	1.17426	1.1333	1.32594	1.17612	1.08007	0.980152	1.06802	0.927935	0.973237	1.21764	0.882568	0.940439	1.01528	0.878687	0.996341	1.05179	1.24597	1.0397	2.10209	1.57646	0.946526	1.14941	1.16096	1.28962	1.30247	1.2015	1.22182	1.15602	0.966259
6772	TAG(12:3/12:3/21:5)	0.875997			765.525	399.551	0.976912	3.47121	3.25613	3.04546	3.14223	4.15697	3.85163	4.22404	6.44105	5.75737	3.72282	4.25406	4.03722	6.78452	4.38346	4.51091	4.20484	2.87425	4.10747	5.41418	4.13084	4.43593	3.79213	5.91752	3.76017	3.69443	3.66213	4.37376	5.82912	4.3274	5.5078	6.04244	6.66345	6.50222	4.412	5.17411	6.14768	7.01427	5.84842	2.89613	4.74091	5.0371	4.4433
6151	TAG(12:0/12:0/17:3)	0.875997			725.556	396.333	15.6923	20.5654	15.1165	22.8609	19.083	21.974	19.6231	21.6272	17.4793	18.2649	22.4768	17.2159	18.928	15.9425	21.1693	20.0169	20.014	21.0282	21.5831	20.0078	19.5335	18.3314	16.7186	15.5168	17.5404	19.3207	19.8843	17.5855	22.577	21.4955	15.2599	18.5124	32.7692	17.3082	15.9728	14.7214	19.2658	19.5024	15.7227	17.3744	15.8654	18.5622	13.9328
8058	TAG(12:2/19:5/19:5)	0.875997			833.588	392.034	3.23039	15.9295	8.57706	8.94894	9.83834	7.5351	14.6996	15.6584	18.6224	13.2805	15.1258	9.88327	16.9665	25.3595	10.7971	9.5695	10.713	11.9193	11.926	16.4045	12.7492	10.4393	10.583	12.7527	13.4912	13.2427	9.14216	19.902	13.0336	14.0236	12.5586	16.1006	34.4169	22.7413	24.4143	11.1413	17.0769	16.0161	13.2134	6.80864	12.4063	15.1752	14.7667
8484	TAG(12:3/20:6/20:6)	0.875997			855.569	391.031	0.31476	1.92621	1.02249	1.0908	0.976901	0.836577	1.60308	2.12986	2.74633	1.3282	2.10826	1.24104	1.8023	2.44485	1.33786	1.02441	1.58822	1.53426	1.24924	2.10936	1.52075	1.44787	1.19552	1.54242	1.44667	1.69129	0.982899	2.04481	1.70138	1.77068	1.49216	1.69643	3.47792	3.00471	2.6328	1.16164	2.01111	1.60137	1.29999	0.822271	1.22207	1.7123	1.58727
7022	TAG(12:2/12:2/22:7)	0.875997			779.54	389.949	0.331979	0.908984	0.641445	0.817264	0.831967	0.537624	0.638745	0.822319	0.917087	0.715649	1.10732	0.680728	0.609679	1.06692	1.03695	0.764728	0.544117	0.894393	0.533275	0.812714	0.760695	0.798324	0.477009	0.741384	0.479711	0.932636	0.404936	0.423409	1.05538	0.602131	0.550536	0.606123	0.901495	0.971278	0.756373	0.540101	0.692879	0.65334	0.881296	0.794918	0.833732	0.704849	0.577847
7943	TAG(13:0/18:4/18:4)	0.875997			827.595	386.797	0.201778	0.723764	0.044946	0.611482	0.58187	0.58675	0.156796	0.272251	0.144329	0.0460085	0.204971	0.0977321	0.182393	0.0690478	0.382508	0.295093	0.364118	0.228268	0.0177797	0.211227	0.271156	0.432015	0.222356	0.159208	0.306658	0.823674	0.184124	0.0592981	0.797197	0.0545576	0.106341	0.0959809	0.377627	0.119246	0.199263	0.380127	0.136103	0.0430947	0.284087	0.176209	0.117429	0.25373	0.199066
5908	TAG(12:0/12:0/16:3)	0.875997			711.541	371.341	0.145158	0.594459	0.775491	1.38207	0.789857	1.20536	1.14699	1.12165	1.20638	1.02795	1.19843	0.430301	0.996283	1.41548	0.878734	1.33005	0.722261	0.449768	0.78218	0.938868	0.926886	2.41347	0.81204	1.67587	0.756274	1.35953	0.850657	1.27347	1.29407	1.28017	1.49834	1.16839	1.98032	1.5667	1.27053	0.479087	2.4964	1.74657	1.03614	0.370145	0.691827	1.301	1.17535
7399	TAG(14:2/14:2/19:4)	0.875997			799.566	350.219	0.161214	0.787682	0.133686	0.797352	0.403057	0.679065	0.20755	0.772009	0.412528	0.166676	0.732551	0.242283	0.337091	0.314397	0.33938	0.533182	0.427773	0.404436	0.195439	0.572959	0.431016	0.599681	0.362732	0.39861	0.413219	0.739774	0.499938	0.230355	0.626896	0.206848	0.33626	0.436348	0.597556	0.521575	0.350732	0.459392	0.389928	0.238452	0.475103	0.242786	0.267256	0.419672	0.493434
8092	TAG(15:0/16:1/18:1)	0.873078			834.754	702.483	0.108181	0.092096	0.0817757	0.147147	0.0486241	0.0789156	0.0670171	0.190186	0.139224	0.270173	0.0803112	0.269378	0.413159	0.164974	0.118179	0.286846	0.0751489	0.238868	0.0874872	0.105074	0.153138	0.126931	0.24641	0.044936	0.088638	0.100184	0.0550296	0.0928776	0.0777968	0.135778	0.052538	0.101816	0.121937	0.0914815	0.0440778	0.0906144	0.102992	0.0811895	0.151891	0.349115	0.121206	0.113872	0.201171
4463	Cer/NS(d18:1/22:1)	0.872479			620.532	513.189	0.0214076	0.148821	0.00867536	0.0103224	0.106785	0.00509621	0.102515	0.105406	0.100338	0.0937423	0.0895557	0.0803645	0.158927	0.201605	0.138857	0.122839	0.0949523	0.116488	0.0794354	0.0234945	0.0904814	0.218207	0.0873073	0.0570798	0.13829	0.0893485	0.0740071	0.109496	0.164285	0.0739123	0.0916186	0.0845492	0.134767	0.0542234	0.133161	0.0944579	0.0730674	0.101128	0.139208	0.0769959	0.141833	0.106847	0.0908998
9400	TAG(16:0/18:1/20:0)	0.869657			906.845	754.144	0.0392886	0.0368403	0.0314044	0.0721816	0.0264173	0.0236577	0.0281109	0.0154126	0.0329181	0.0426204	0.0359696	0.0341962	0.0534032	0.0384479	0.0249651	0.0425471	0.0194137	0.0420963	0.0340678	0.0217465	0.0347853	0.0713364	0.0208134	0.0341776	0.0309857	0.0344765	0.0162319	0.0386424	0.0378079	0.0457644	0.016225	0.0587956	0.0342366	0.045375	0.0153305	0.0358804	0.0268577	0.0304728	0.0390539	0.165718	0.0383574	0.0418269	0.0445922
6849	PE(16:0/22:3)	0.868648			770.557	459.075	2.97005	5.87124	5.90391	6.06751	6.19322	7.51267	7.45551	6.56429	8.22908	7.37156	6.61027	5.36669	5.20455	7.14	6.29171	6.11392	6.22012	5.2522	6.75999	7.43846	6.32685	6.72865	5.72367	7.61705	5.5855	6.18029	5.82674	5.96672	7.45248	7.17205	7.30753	7.89292	13.3183	7.76934	5.97823	5.75578	8.326	7.91949	5.77163	4.05607	6.3568	6.93526	6.46113
4690	Cer/NS(d18:1/23:0)	0.868401			636.628	590.355	0.31832	1.51802	0.702359	1.26814	1.22172	1.3202	1.31906	2.45511	2.28009	2.02728	2.94496	1.37828	2.31618	2.7	1.92319	3.15184	1.31509	1.02129	1.96718	2.97294	1.80606	1.82704	1.49524	1.76842	1.16666	1.58037	1.06731	1.45816	1.76218	1.18147	1.81369	1.59415	2.58451	1.95204	1.26727	1.15941	2.39046	1.77872	2.8022	0.6964	1.57882	1.64623	1.6683
5826	PC(15:0/15:0)	0.86589			706.537	408.003	5.85346	22.5503	8.73293	18.9292	10.9011	14.2637	15.9737	23.1497	15.4322	9.77918	18.0801	16.2439	26.0611	23.7743	23.4065	32.1456	16.6652	15.9463	16.311	20.479	17.7339	35.3371	13.3874	16.2305	19.8651	25.6603	18.8806	15.2738	18.4576	18.6602	18.1538	20.544	34.6607	20.7466	16.9298	17.7937	31.6363	21.0533	20.6429	16.109	15.5114	20.7767	18.3336
5064	DAG(16:0/22:5)	0.863988			660.555	512.079	0.00737728	0.337849	0.253877	0.498951	0.413087	0.24313	0.337545	0.445875	0.373195	0.399364	0.500239	0.351644	0.664301	0.443068	0.567929	0.603761	0.408308	0.457208	0.280484	0.469497	0.402834	0.772838	0.26574	0.247928	0.237778	0.308222	0.291164	0.249598	0.453615	0.3347	0.361559	0.184631	0.396781	0.203346	0.282203	0.25351	0.25614	0.269626	0.416434	0.288092	0.323328	0.319862	0.349606
4875	Cer/NS(d18:2/24:0)	0.861344			648.656	619.234	0.00963531	0.00809479	0.00144754	0.00488603	0.00776892	0.00331405	0.00369444	0.00933369	0.00485792	0.00829596	0.0118516	0.00716884	0.0127398	0.0141278	0.014467	0.0257471	0.00485154	0.00465746	0.00701499	0.0196684	0.00918116	0.0137267	0.00692494	0.00696625	0.00437301	0.0103775	0.00505218	0.0110089	0.0091213	0.00280035	0.00774622	0.00932603	0.0164646	0.00364445	0.00422971	0.00643916	0.0143362	0.013746	0.00831025	0.0208515	0.00412361	0.00897844	0.00859795
10426	TAG(20:3/20:3/22:5)	0.860357			998.815	694.057	0.119306	1.15063	0.382771	0.171311	0.145111	0.17399	0.797117	0.329708	1.92876	1.82095	1.39784	0.645895	1.88114	1.15877	0.294602	0.160745	0.415408	0.460193	0.230561	0.249859	0.695733	0.630434	0.275264	0.808574	0.435961	0.401133	0.188968	0.560987	0.713691	0.571633	0.290965	0.379803	0.672199	0.741445	0.701402	0.432946	0.507689	0.513288	0.655825	0.16811	0.656094	0.515321	0.482636
3246	Cer/NS(d16:1/16:0)	0.859641			510.488	405.873	0.0741311	0.253648	0.108534	0.219312	0.0943467	0.254572	0.127476	0.351275	0.350535	0.18537	0.279526	0.338795	0.458609	0.427927	0.451851	0.506349	0.220819	0.0860357	0.353743	0.38675	0.27648	0.359454	0.209612	0.167939	0.236195	0.29675	0.296065	0.222175	0.216051	0.229565	0.225477	0.265932	0.353597	0.392101	0.187272	0.214743	0.449967	0.259203	0.286321	0.182145	0.296918	0.267374	0.281334
7853	TAG(14:0/16:0/18:1)	0.847901			822.666	654.58	0.010217	0.00464757	0.00667115	0.0109652	0.00276677	0.00740334	0.0180375	0.0167187	0.0275225	0.0135249	0.00658142	0.0378471	0.0454852	0.0305327	0.0122729	0.0377379	0.00824135	0.0349452	0.00868099	0.0102584	0.0175529	0.0178932	0.00208978	0.00334861	0.0114548	0.0162988	0.00571791	0.00644639	0.0138267	0.0183361	0.00438448	0.00579929	0.0173983	0.00907888	0.00319872	0.0139019	0.0154876	0.0135679	0.0390035	0.0629911	0.00548264	0.0142853	0.013905
3432	LPE(22:4)	0.844022			530.347	91.8467	0.133611	0.559231	0.223188	0.525503	0.374053	0.462805	0.203823	0.777063	0.480851	0.135207	0.702464	0.252646	0.507111	0.276359	0.356888	0.533691	0.348337	0.354166	0.19351	0.597772	0.399914	0.520204	0.374942	0.394593	0.322983	0.662267	0.333508	0.229492	0.646453	0.195561	0.365395	0.283506	0.59414	0.517481	0.342909	0.259653	0.460166	0.105476	0.327339	0.179706	0.235545	0.367566	0.363363
10015	TAG(18:1/18:1/22:1)	0.842523			958.879	764.515	0.173333	0.139492	0.185341	0.175358	0.10801	0.0961704	0.0904919	0.101213	0.126104	0.273455	0.140555	0.237983	0.145807	0.159645	0.101703	0.121955	0.0824938	0.150428	0.0945889	0.0875867	0.139586	0.238913	0.0849208	0.116638	0.158062	0.107661	0.0868497	0.162145	0.17958	0.24577	0.0729476	0.143955	0.209489	0.182525	0.112646	0.180607	0.139688	0.169514	0.0865685	0.198973	0.126504	0.150198	0.15153
8280	TAG(14:0/18:2/18:2)	0.840341			844.737	676.687	0.257657	0.232772	0.217499	0.66201	0.164182	0.185591	0.17583	0.223022	0.480561	0.676051	0.334922	0.701925	0.800243	0.46503	0.279242	0.501753	0.348506	0.76397	0.236017	0.240075	0.397343	0.286932	0.162787	0.113802	0.228275	0.229953	0.166421	0.2239	0.280753	0.340159	0.141791	0.22051	0.282191	0.267404	0.171023	0.294023	0.290096	0.309233	0.3769	1.30373	0.240708	0.29653	0.330491
8421	PC(20:5/22:6)	0.8394			852.536	339.764	0.00478861	0.00378695	0.0164791	0.0236437	0.0168573	0.02392	0.022586	0.00477072	0.0249276	0.0168826	0.00984779	0.00137647	0.0179495	0.0281118	0.00286152	0.0406576	0.00399237	0.010393	0.00879303	0.0366785	0.0159652	0.00786483	0.000610665	0.00694854	0.001415	0.000885173	0.00424372	0.0596853	0.0178457	0.00238132	0.00184428	0.00366788	0.00354526	0.00177354	0.00102463	0.0112463	0.0104764	0.00495453	0.00192437	0.0147216	0.00658993	0.00818245	0.00896573
7288	PE(18:0/22:5)	0.835949			794.567	476.346	0.576603	2.47015	2.66198	2.75918	2.08889	2.68641	4.72154	3.75879	2.6447	3.29139	3.22165	1.0999	4.64176	4.43555	3.8686	2.09674	3.82789	3.40562	3.00233	4.28877	3.07742	2.57258	1.87952	2.16692	1.81691	2.29795	2.11554	2.78758	3.27229	3.59845	5.37509	1.87757	7.44709	3.27478	4.19012	2.4375	3.89545	4.15166	2.97938	1.13087	1.48203	3.03746	2.90243
5492	DAG(20:3/20:3)	0.827069			686.571	523.294	0.314552	1.1266	0.653814	0.57876	0.978951	0.667714	0.821218	1.57331	1.61009	1.81559	2.05734	1.15317	1.45918	1.7496	1.54311	1.25131	1.05482	1.08054	0.742818	1.82436	1.20284	2.18287	1.20585	1.19605	0.716461	0.974939	0.720367	0.710904	1.30548	0.596838	1.14713	0.697041	1.02923	0.685738	1.01417	0.746178	0.946902	0.898474	2.11796	0.797727	1.09219	1.03912	1.04317
5094	Cer/NS(d18:1/25:1)	0.823311			662.644	589.263	0.0297696	0.195969	0.110772	0.170186	0.126495	0.156778	0.140837	0.248621	0.276692	0.155807	0.166317	0.202431	0.258114	0.285714	0.231506	0.432826	0.1397	0.128916	0.208158	0.238508	0.195206	0.266116	0.146245	0.131833	0.143873	0.218117	0.159561	0.120559	0.110493	0.121902	0.131168	0.15057	0.250551	0.267854	0.137111	0.108635	0.33137	0.172114	0.209667	0.0722895	0.137901	0.169396	0.19884
7221	PE(22:2/18:5)	0.823194			790.559	452.756	1.46009	2.74958	2.27565	2.44428	3.31804	3.05392	3.85075	3.07415	2.88686	3.12345	4.24543	2.52879	3.23757	2.43539	3.90592	2.57057	2.52502	3.48792	3.53622	2.81908	2.97643	3.46937	2.62385	4.98735	2.50671	2.78072	2.33615	2.01935	3.55345	2.72684	2.605	2.86737	6.59655	3.47666	2.73742	3.60264	4.38626	2.6441	2.19866	1.98782	3.65377	3.188	2.47006
4838	Cer/NS(d18:1/24:2)	0.814742			646.613	544.655	0.702096	3.27998	2.45917	3.17019	2.08787	3.08086	2.09348	4.34449	3.84822	3.84593	3.92981	2.88508	3.60852	5.43853	4.66657	4.31187	2.99934	2.494	3.94515	6.39321	3.47922	3.1519	2.71534	2.10746	2.2515	3.49902	2.09987	2.12541	2.69614	2.46947	3.11055	2.47994	3.83041	4.41378	2.62594	1.99787	3.8858	3.4326	3.27461	1.59595	3.31583	2.85397	2.94637
5324	Cer/NS(d18:1/26:1)	0.811689			676.592	626.74	0.0003361	0.00395923	0.000328697	0.0030738	0.00297958	0.00437567	0.0103329	0.00436434	0.00421259	0.00339405	0.00398299	0.00410335	0.00318765	0.00399712	0.00252845	0.0236352	0.00277528	0.00105321	0.00209695	0.00796589	0.00463415	0.00255967	0.001612	0.00178406	0.00260305	0.0051112	0.00245343	0.00333215	0.00788448	0.00772245	0.00465562	0.00392057	0.0115908	0.0122833	0.00374691	0.00340903	0.00974017	0.00875205	0.00391171	0.00102111	0.000978126	0.00495359	0.0042107
10221	TAG(18:0/20:3/22:5)	0.810532			976.915	746.83	0.0738357	0.0481924	0.0641065	0.0752142	0.0466377	0.0496714	0.0326119	0.0525856	0.0686807	0.112531	0.0632427	0.0932158	0.0966814	0.0661982	0.0609986	0.0932535	0.0583101	0.0969594	0.0488806	0.0450494	0.0673429	0.0950938	0.0398812	0.0383253	0.0484651	0.0602649	0.0492905	0.0519748	0.0539273	0.0998391	0.0268191	0.0565883	0.0605623	0.0530221	0.029764	0.0639347	0.0668351	0.0546382	0.0559614	0.110953	0.0567029	0.0586421	0.0657434
9271	TAG(16:0/18:1/20:4)	0.808251			898.785	705.266	1.70887	0.304791	2.9392	4.88212	1.38226	1.52273	1.9437	1.33737	3.1926	3.96146	4.45785	8.58179	0.4466	1.87709	1.31352	2.46806	1.33473	3.46307	1.53406	1.21373	2.49328	3.40121	0.194871	2.70779	3.10638	1.71777	1.28863	3.04099	1.88296	11.1787	1.34837	5.78076	2.24199	5.15206	1.12631	2.97666	0.482425	2.36077	1.33832	3.91488	1.48437	2.83631	2.34784
9620	TAG(16:0/18:2/22:5)	0.806704			922.732	716.401	0.0610709	0.041175	0.0735718	0.177436	0.060482	0.055039	0.064954	0.0878033	0.0712415	0.0930248	0.0644469	0.0878911	0.097376	0.120346	0.0826371	0.0867317	0.101958	0.164859	0.0838024	0.0746173	0.0875232	0.109852	0.0375658	0.0671004	0.0538054	0.103313	0.0523204	0.0456216	0.0602352	0.0923219	0.0439926	0.0242172	0.0574393	0.105798	0.0348377	0.0752839	0.108568	0.120454	0.0842377	0.193551	0.110895	0.0790705	0.110573
4692	Cer/NS(d19:1/22:0)	0.806602			636.62	562.684	0.00264754	0.0295739	0.0133406	0.0191158	0.0164948	0.0117312	0.0126145	0.0601598	0.0398938	0.0258843	0.0524204	0.0374032	0.0167293	0.0472784	0.0308102	0.0648842	0.0232088	0.0200914	0.0458995	0.0718244	0.0321003	0.0235776	0.0110049	0.0241236	0.00933704	0.0266403	0.0133316	0.0168156	0.0309275	0.0187138	0.0271644	0.016913	0.0363245	0.0435855	0.0225398	0.0157417	0.0376204	0.0203665	0.0377947	0.0102866	0.0219715	0.023239	0.0286494
7207	TAG(12:3/16:5/19:5)	0.80357			789.558	442.221	0.995845	1.07976	1.54356	0.814612	0.928934	1.20968	1.34398	1.53161	1.60698	1.22939	1.44808	1.57307	1.08882	0.790023	1.27078	0.968502	1.13394	1.49832	1.40188	0.95871	1.22082	0.992939	1.02739	1.24759	0.793808	1.00706	0.961146	0.859119	0.752989	1.19822	1.42123	0.96437	2.34211	1.23279	1.17608	0.807574	1.04907	0.686404	1.07941	1.18952	1.12197	1.09554	0.913983
10192	TAG(18:0/20:4/22:5)	0.800979			974.816	707.185	0.552879	1.36268	0.926711	1.66688	0.654542	0.596183	0.962831	0.735279	2.5255	3.78119	2.86767	1.98788	2.06221	1.31624	0.819831	0.59082	0.623481	1.00449	0.769227	0.726525	1.32665	1.6745	0.797802	1.43908	1.09943	0.782664	0.766111	1.45207	1.09884	2.41801	0.717571	1.46909	1.71027	1.58097	1.21943	1.15465	1.28631	1.40125	0.791359	0.779326	0.851308	1.2245	1.11604
7251	PE(18:0/22:6)	0.798415			792.552	446.937	1.94024	13.021	12.5129	8.5733	9.56356	13.8165	17.7895	20.0938	21.0197	20.8521	16.6972	12.4759	12.5619	25.0363	16.458	11.8302	15.812	8.96098	11.5227	17.7421	14.414	16.709	13.0486	23.2409	11.1525	10.9805	10.1713	14.9602	19.7962	12.28	25.6111	16.5673	25.6632	23.5755	22.0492	16.0488	24.5053	19.9336	26.3813	5.11895	14.3184	17.6056	15.2221
10144	TAG(20:3/20:4/20:4)	0.797886			970.808	645.363	0.0123687	0.0261739	0.00405394	0.0195308	0.024109	0.0205494	0.00884473	0.0263136	0.0195964	0.0019187	0.0247099	0.0160467	0.0183447	0.0179758	0.0195829	0.0232649	0.0150201	0.0233187	0.0063399	0.0354453	0.0181754	0.0347221	0.0107048	0.00973253	0.00981721	0.0170806	0.0144403	0.00254795	0.0283422	0.00315509	0.0128437	0.00593096	0.010984	0.0171636	0.00640932	0.0169927	0.0133253	0.022329	0.0136422	0.0115393	0.0132062	0.0137455	0.0130361
4321	Cer/NS(d17:1/22:0)	0.794482			608.597	558.038	0.0503993	0.14573	0.0567171	0.109242	0.0950311	0.149277	0.0973673	0.217745	0.219106	0.186922	0.205457	0.159574	0.239687	0.279326	0.162253	0.278352	0.136591	0.0869359	0.186209	0.224379	0.164315	0.218638	0.145022	0.143198	0.120712	0.1969	0.114021	0.109532	0.127143	0.120296	0.122886	0.150036	0.278886	0.192868	0.105695	0.116869	0.208413	0.160236	0.208413	0.0443764	0.166678	0.152541	0.153991
5415	DAG(20:4/20:4)	0.787415			682.54	454.108	0.136535	0.644135	0.458596	0.391028	0.317203	0.492874	0.591093	0.761907	1.08892	0.854728	1.23915	0.707253	0.472168	0.731023	0.555617	0.513231	0.36812	0.46133	0.496504	0.689379	0.59854	0.6138	0.479638	0.640265	0.41774	0.482035	0.443713	0.454072	0.477803	0.467403	0.576937	0.535053	0.934741	0.835495	0.730993	0.468816	0.822305	0.725206	0.559286	0.331693	0.443241	0.572012	0.542931
10164	TAG(18:0/20:4/22:6)	0.775784			972.748	708.246	0.0155457	0.0537689	0.0296727	0.0398606	0.013251	0.0164276	0.0263387	0.0115138	0.0266912	0.0361301	0.036511	0.0276116	0.0322415	0.0193635	0.0120368	0.019758	0.00661648	0.0239165	0.0149279	0.0219643	0.0242074	0.0427676	0.0152404	0.0174442	0.0397524	0.0121928	0.0159758	0.0579092	0.0289938	0.0295351	0.402028	0.021763	0.810079	0.0447651	0.0199797	0.0220486	0.0392473	0.0264327	0.00851946	0.0222563	0.0146435	0.0845787	0.021395
8697	TAG(16:0/17:0/18:0)	0.773381			866.816	751.783	0.015409	0.0370322	0.0372425	0.0631269	0.0666394	0.0500215	0.0452057	0.0489251	0.0464348	0.0741821	0.0426074	0.131205	0.0961534	0.0574386	0.0428868	0.105523	0.0378851	0.0444333	0.0324715	0.0306273	0.0552725	0.0858139	0.0496078	0.0436987	0.035965	0.0481473	0.0361283	0.0301349	0.0567022	0.106639	0.0258635	0.0532726	0.0803611	0.0214344	0.0165146	0.0526079	0.0577667	0.0405956	0.0497258	0.1166	0.00383773	0.0505709	0.0659555
5395	Cer/NDS(d16:0/28:0)	0.770968			680.701	559.644	1.36022	1.17161	1.17478	1.22621	1.17119	1.15044	1.16576	1.16881	1.11876	1.23594	1.18541	1.16632	1.30051	1.18771	1.26529	1.23467	1.25501	1.2422	1.24041	1.07489	1.20481	1.19006	1.09648	1.192	1.16124	1.1779	1.0798	1.08422	1.13388	1.2034	1.21015	1.16777	2.18727	1.19528	1.16564	1.19719	1.25905	1.2295	1.11975	1.17903	1.23309	1.22313	1.11095
4721	Cer/NDS(d19:0/22:0)	0.770968			638.655	478.904	0.970641	0.630008	0.752406	0.561075	0.645348	0.610066	0.562262	0.681237	0.521002	0.54059	0.558126	0.773834	0.756052	0.494442	0.703701	0.55243	0.608999	0.772587	0.651061	0.510814	0.642834	0.452103	0.663425	0.614325	0.626325	0.615314	0.617	0.510461	0.592304	0.540669	0.63492	0.555324	1.30084	0.607419	0.601146	0.634668	0.474312	0.453954	0.518783	0.749083	0.714638	0.623851	0.516339
3313	Cer/NS(d17:3/16:1)	0.770968			518.456	343.493	0.0353754	0.0955768	0.0735993	0.282298	0.0656933	0.145081	0.175676	0.0739111	0.044084	0.059622	0.0657234	0.0591412	0.0636	0.0892817	0.0578393	0.167589	0.316611	0.050507	0.0340995	0.0930062	0.102416	0.0868064	0.112838	0.095135	0.0493482	0.0675765	0.0658747	0.0621521	0.093074	0.0739335	0.0916251	0.075055	0.250052	0.157257	0.0841272	0.0887665	0.0603599	0.123635	0.121305	0.0548634	0.051983	0.0932884	0.0893421
2752	ACar(20:1)	0.770563			454.389	157.732	0.00243805	0.0180599	0.0195413	0.00603436	0.0169099	0.0368967	0.0626897	0.0747834	0.510935	0.0664895	0.122368	0.1195	0.0403588	0.0636363	0.0435196	0.141032	0.00993066	0.0382909	0.126872	0.0890892	0.0804687	0.0237793	0.0258884	0.101676	0.00501527	0.0846107	0.0252886	0.240804	0.0688979	0.126961	0.341381	0.0720547	0.0023813	1.86706	0.0618347	0.0172365	0.360443	0.4514	0.0139383	0.0187665	0.0403946	0.19749	0.136203
9892	TAG(18:2/20:3/20:4)	0.759565			946.785	686.76	0.848524	2.25634	1.64241	1.76461	0.724066	0.674601	1.47933	1.08594	3.1377	5.44854	4.88718	1.89895	2.83265	1.92382	0.917932	1.09231	0.889098	1.52725	1.06914	0.973001	1.85367	2.31208	1.26918	1.8874	1.70401	1.02481	1.01254	2.55338	1.8891	3.58961	0.77948	2.26001	1.80979	2.51638	1.36587	1.95462	2.68645	2.59168	0.968551	1.24072	1.36236	1.8389	1.45623
10138	TAG(18:1/20:4/22:6)	0.758831			970.782	678.973	0.204361	1.1154	0.594819	0.458895	0.208639	0.200387	0.392137	0.326075	2.10315	1.71351	1.54759	1.1439	0.850594	0.423354	0.0912089	0.441012	0.258895	0.57963	0.29011	0.269058	0.660636	0.708936	0.32528	0.798751	0.459225	0.282022	0.484998	0.665819	0.402804	1.07218	0.301398	0.662177	1.17182	0.399674	1.13539	0.525234	0.72365	0.679593	0.292293	0.313516	0.406358	0.590556	0.877828
10363	HexCer/NS(d26:1/29:1)	0.757822			992.749	733.136	0.0319983	0.0247792	0.0328985	0.0478605	0.0210482	0.0214901	0.0191258	0.0138664	0.0342983	0.0559807	0.0311695	0.0332104	0.0295607	0.0340688	0.00674453	0.0317153	0.0240917	0.0387127	0.0261809	0.0186944	0.0288747	0.0524305	0.018155	0.0207609	0.0335669	0.0291356	0.00402628	0.0312437	0.0238144	0.0544629	0.0146235	0.027595	0.0274745	0.0232044	0.010675	0.0460765	0.0293232	0.0260761	0.0220436	0.0313984	0.0280767	0.0277081	0.0305871
9914	TAG(18:1/18:2/22:5)	0.754499			948.744	720.607	0.0407307	0.0660679	0.0576003	0.0523847	0.0414037	0.0351164	0.0518795	0.0292301	0.0545066	0.0638941	0.0779459	0.049535	0.113076	0.0471329	0.0899955	0.174628	0.100203	0.182839	0.0336685	0.0292388	0.0695538	0.135016	0.0399415	0.0377583	0.124786	0.0373828	0.0259451	0.0688507	0.114421	0.0663334	0.0364533	0.0568111	0.0829997	0.0382138	0.0519059	0.0615029	0.0575873	0.112673	0.0282571	0.154127	0.0497015	0.0690334	0.0343942
4836	Cer/NS(d18:2/24:1)	0.754496			646.601	574.74	0.224588	0.475911	0.260015	0.378303	0.434422	0.526905	0.468463	0.514527	0.564096	0.614583	0.578736	0.423603	0.536931	0.691829	0.481538	0.554205	0.553452	0.421912	0.544622	0.546154	0.48974	0.517118	0.542457	0.435562	0.449152	0.615436	0.492337	0.458729	0.533299	0.456052	0.464875	0.592525	0.44867	0.488896	0.398704	0.476395	0.562521	0.608617	0.284843	0.169413	0.509301	0.475245	0.415173
9915	TAG(18:1/18:1/22:6)	0.752576			948.801	702.871	1.49511	3.05017	3.79768	4.13216	1.87332	1.44761	2.07692	1.50233	6.54891	6.61192	5.6627	4.55326	3.64464	2.40667	1.28439	1.64632	1.3427	3.40048	1.58958	1.75181	2.99093	3.39535	2.00678	2.54659	2.87829	2.22774	1.65046	3.55879	2.44803	7.50631	1.55549	3.39889	5.33937	3.83416	2.01889	2.95668	3.37362	3.07111	1.57181	2.28992	1.94382	2.9786	3.87207
9622	TAG(18:1/18:2/20:4)	0.747489			922.751	666.15	0.0317696	0.0993613	0.0775157	0.071899	0.104855	0.0964395	0.102745	0.0994438	0.0988389	0.035912	0.0935628	0.0589191	0.0929645	0.109143	0.0885267	0.0912948	0.0876856	0.0543059	0.0970107	0.118981	0.0855587	0.12458	0.0840488	0.104352	0.0722913	0.106849	0.0824632	0.103865	0.114998	0.0885156	0.113092	0.103148	0.188011	0.106407	0.0824799	0.0926757	0.125936	0.110161	0.0887209	0.0206282	0.0783732	0.0995798	0.0824208
7441	PC(16:2/22:6)	0.733244			802.534	369.557	0.248888	2.00265	0.99115	1.77356	1.10525	2.00853	2.02053	1.76912	3.37481	1.7375	1.41804	0.324911	1.51808	2.84653	1.69405	1.59786	1.01946	0.61446	1.38269	1.92335	1.56857	2.2112	1.14574	2.01953	1.39504	1.72477	1.1464	2.92048	2.06778	1.75191	2.1294	2.21024	3.15767	2.61747	1.3888	1.34014	2.34911	1.81747	1.98402	0.873399	1.28216	1.87664	1.55083
5284	Cer/NS(d18:1/26:2)	0.729361			674.631	605.53	0.302858	0.696057	0.489712	0.565844	0.622158	0.636611	0.628901	0.78995	0.73871	0.789172	0.762957	0.653008	0.902125	0.946806	0.80416	0.961638	0.696045	0.611156	0.737356	0.926187	0.713071	0.609346	0.674456	0.608045	0.623841	0.774545	0.575602	0.654797	0.805618	0.613576	0.72375	0.733429	1.36341	0.806531	0.674372	0.634667	0.752952	0.756233	0.793531	0.411624	0.820455	0.720539	0.655975
10218	TAG(18:0/20:4/22:4)	0.7256			976.83	720.766	0.455664	1.1121	1.0686	0.734164	0.510516	0.549729	0.708593	0.5327	1.32481	2.39763	1.28294	1.16431	1.311	0.714417	0.613566	0.394373	0.455631	0.868892	0.528774	0.484765	0.860659	1.27132	0.526351	0.916294	0.918987	0.501779	0.521773	1.30974	0.711262	1.79272	0.517109	0.870855	1.72502	1.09118	0.771093	1.06374	0.894068	1.04843	0.598908	0.537663	0.67675	0.913252	0.862458
9759	TAG(16:0/18:1/22:0)	0.721599			934.876	769.385	0.0274365	0.0263673	0.0230681	0.0513036	0.02481	0.0245095	0.0364214	0.012572	0.0380222	0.0500132	0.0316169	0.0307401	0.0395341	0.0299313	0.0219258	0.0401707	0.0182099	0.0287558	0.0281369	0.0204779	0.0302012	0.0793474	0.0211723	0.0411512	0.0207285	0.0257257	0.0234752	0.0366784	0.0393243	0.0453733	0.0126265	0.0363171	0.0393905	0.0392655	0.0119059	0.0329837	0.0323537	0.0315317	0.0349372	0.0823146	0.038239	0.0362421	0.0339136
9645	TAG(18:1/18:2/20:3)	0.721591			924.797	692.138	0.686656	0.913502	0.988173	1.87395	0.610015	0.695219	0.905822	0.512415	1.3259	2.05756	1.40157	0.867533	1.14488	0.827208	0.434094	0.787962	0.413137	1.09351	0.635358	0.573035	0.937375	1.12829	0.628385	0.676359	0.943614	0.640185	0.470674	1.24847	0.997117	2.15174	0.543703	1.24287	1.41868	1.8959	0.67547	1.03784	1.63272	1.40844	0.494841	1.19551	0.580159	1.05055	0.990997
10380	TAG(20:3/20:4/22:6)	0.70876			994.785	669.538	0.0535321	0.422384	0.15874	0.0716054	0.0851748	0.0689436	0.260601	0.254556	0.916489	1.24271	0.794352	0.396921	0.543129	0.490008	0.163242	0.134025	0.143631	0.186609	0.134641	0.151909	0.33366	0.453418	0.212788	0.832831	0.203643	0.131309	0.149545	0.398314	0.24415	0.269078	0.192368	0.258054	0.401805	0.635907	0.596798	0.296349	0.509926	0.408278	0.261761	0.0818394	0.244095	0.339113	0.34108
9621	TAG(16:0/20:3/20:4)	0.704728			922.785	695.143	1.94826	3.9217	2.00724	4.53246	1.76371	1.8716	2.24124	1.92968	5.7436	8.48674	5.39331	4.5168	4.9186	3.01023	1.9032	1.42533	1.76935	3.28186	1.95077	1.95209	3.22839	4.99647	2.22109	3.1242	2.93536	2.29404	1.51376	3.83058	2.95078	7.89065	1.53011	4.58075	3.61869	6.44676	2.76841	3.72444	5.31226	3.84807	2.02128	2.20735	2.60652	3.52108	3.06293
4662	PC(3:0/22:1)	0.683537			634.452	80.7786	0.165901	0.173602	0.226781	0.404939	0.0436431	0.734945	0.794881	0.384087	0.604707	0.623068	0.34091	0.321847	0.390221	0.671894	1.47398	0.43125	0.157539	0.878279	0.243233	0.256963	0.466134	0.200838	0.210297	0.0384637	0.188151	0.165976	0.0771597	0.98094	0.22578	0.394046	0.0327038	0.67044	2.09237	0.365932	0.493024	0.490873	0.547468	0.808771	0.339218	0.688568	0.973072	0.499204	0.391438
5446	DAG(20:3/20:4)	0.682953			684.556	477.427	0.0969322	0.764956	0.361256	0.41875	0.307093	0.326734	0.753409	0.634468	0.838464	0.61132	1.12717	0.47033	0.737452	0.846517	0.511061	0.340488	0.372952	0.472253	0.42236	0.851036	0.56325	0.429351	0.418796	0.453623	0.48722	0.539942	0.32526	0.60287	0.620814	0.430966	0.414947	0.766668	1.30537	1.39837	0.895275	0.393936	0.624493	0.607368	0.571226	0.216559	0.39848	0.595077	0.538298
9958	TAG(18:0/20:3/20:3)	0.682852			952.775	745.202	0.0237224	0.019848	0.0229877	0.0380713	0.0233027	0.012109	0.00848205	0.00701161	0.0307123	0.0467865	0.0143168	0.0482179	0.0467288	0.0285138	0.0112382	0.0346003	0.0114799	0.0329013	0.0104025	0.00748227	0.0239458	0.707116	0.0143189	0.521371	0.0114789	0.0174795	0.0055652	0.0253911	0.0143358	0.044475	0.00481671	0.0143246	0.0135998	0.0256559	0.00685076	0.027372	0.0173048	0.00726647	0.0146638	0.0430622	0.0111189	0.0773784	0.0226026
10053	TAG(18:0/18:1/22:0)	0.680673			962.905	775.734	0.0586051	0.0330983	0.0543026	0.064945	0.0290397	0.0284826	0.021533	0.0448632	0.0431948	0.0605088	0.0301826	0.129702	0.04688	0.0441392	0.0313358	0.0493023	0.0285679	0.0468803	0.027082	0.0301076	0.0451376	0.0502217	0.0391625	0.0264765	0.0396003	0.0408062	0.0270754	0.0423416	0.0524705	0.073664	0.0255143	0.0448963	0.0467827	0.0550245	0.033021	0.0455654	0.0388156	0.0364961	0.026789	0.0838615	0.0308211	0.0429703	0.0519004
9646	TAG(18:0/18:2/20:4)	0.65537			924.8	711.083	3.2712	4.53353	3.92079	6.04381	2.06634	2.08539	2.45763	2.4171	6.16803	7.3956	4.49123	4.13973	3.69853	4.51828	1.54421	3.59763	2.55513	3.80449	2.10384	2.2983	3.65554	4.24673	1.77386	2.10518	4.14231	1.93891	2.48422	4.72631	2.65385	7.39848	1.45928	4.67614	5.20236	5.33542	1.5527	5.56109	3.69342	3.59785	3.23093	5.56314	3.04976	3.7196	2.97002
6795	PE(18:3e/21:2)	0.649843			766.57	473.233	0.121578	2.70084	2.11175	0.0768215	2.05716	0.112254	3.5921	0.151915	0.285386	0.181031	0.202994	0.221978	0.186543	0.131046	1.77156	0.114435	0.138589	0.254324	1.72638	0.128193	0.813344	0.135176	0.15192	0.145178	0.0975396	2.94498	0.127247	0.124956	0.153027	2.5314	0.163	0.0944156	5.09725	0.180726	3.07062	0.0819061	0.211242	0.0894628	0.196808	0.170933	1.76421	0.8766	0.157802
6441	PE(16:0e/21:2)	0.647768			744.59	495.978	2.13989	5.76263	4.15654	3.93226	4.08998	5.08804	4.78646	5.62704	7.69487	5.45708	6.64362	5.12035	4.74869	6.81126	5.18314	5.66468	4.23976	5.12814	6.1355	6.50505	5.24575	8.45828	3.55591	5.7851	3.95387	4.93381	4.62695	5.00908	5.85199	5.06514	6.45874	3.96339	6.73403	7.93007	5.1755	4.2001	11.042	7.01649	5.64373	2.70559	5.3197	5.67148	5.20143
9649	TAG(16:1/20:2/20:3)	0.643528			924.745	668.102	0.0820893	0.0830731	0.0585604	0.120603	0.0278575	0.0248897	0.0419061	0.0581403	0.183864	0.115482	0.0882059	0.169647	0.136554	0.06466	0.0517433	0.0699047	0.0586757	0.13247	0.0239935	0.0275065	0.0809913	0.102075	0.0446778	0.0645555	0.0907497	0.0466757	0.0325745	0.149055	0.0980788	0.145582	0.0262006	0.130931	0.0814999	0.250926	0.0648361	0.134564	0.158237	0.0784173	0.0913671	0.136542	0.0904056	0.100897	0.11432
6853	PE(18:1e/21:2)	0.643021			770.597	504.945	0.376444	0.871167	0.75744	0.666213	0.685869	0.728402	0.856116	0.896617	1.1666	1.13653	1.00383	0.767902	0.73078	1.05263	1.05509	1.04315	0.672244	0.858179	0.926688	1.02326	0.863757	1.55414	0.738445	0.82158	0.562519	0.823243	0.754892	0.722436	0.871784	0.696816	0.95151	0.640506	1.22828	1.16166	0.827304	0.648067	1.66786	1.15866	1.12473	0.531435	0.881069	0.918346	0.905976
6828	PE(18:4e/21:0)	0.639123			768.588	505.134	1.64601	5.77942	4.41721	3.95542	4.72439	4.64807	5.99986	5.60086	6.30257	5.66087	6.65643	3.58304	5.14576	5.71698	7.64628	5.85231	4.56672	5.8147	5.33144	6.24587	5.26471	6.41728	5.60533	5.76893	4.3105	4.42482	4.27871	5.18372	5.19497	4.16101	6.39393	4.63678	8.36049	6.62043	5.43645	4.37942	7.23704	6.26151	8.08865	2.9277	6.31635	5.6002	5.02863
8161	SQDG(18:0/16:1)	0.638804			838.55	367.018	0.0524796	0.593731	0.412395	0.657875	0.391267	0.573692	0.72128	0.802956	1.0446	0.729333	1.14832	0.367132	0.548163	1.09453	0.863213	0.685064	0.888376	0.460318	0.800684	0.870211	0.685281	1.10384	0.449468	1.80425	0.531542	0.627364	0.370474	0.854034	0.836959	0.618962	1.04418	0.573757	0.907355	1.14891	0.823674	0.503567	1.38279	1.07701	0.842508	0.334495	0.555986	0.819556	0.571769
5019	DAG(18:2/20:4)	0.635464			658.539	466.374	0.529485	1.66658	1.72523	1.79273	1.18997	1.71757	2.22371	2.19568	2.31333	2.43707	2.29792	1.82027	1.47947	2.52899	2.07705	1.99598	1.35883	1.24871	1.87693	2.78866	1.86321	2.20835	1.55757	1.84514	1.29603	1.46805	1.37293	1.41889	2.00971	1.45859	1.71971	1.50111	2.85732	1.36497	1.89583	1.33199	2.05135	1.97418	1.54581	0.943284	1.60412	1.67125	1.767
6463	PE(14:1e/23:0)	0.631424			746.624	481.686	0.0757872	0.256085	0.209355	0.369037	0.259043	0.323955	0.259249	0.219477	0.485378	0.277946	0.232581	0.245078	0.170229	0.419586	0.199241	0.207894	0.234324	0.184003	0.253169	0.253249	0.256733	0.69244	0.265715	0.289369	0.267509	0.332483	0.274721	0.224764	0.318611	0.364664	0.229312	0.300626	0.578598	0.303857	0.249446	0.265701	0.573166	0.433279	0.309412	0.204137	0.165877	0.332184	0.289563
6041	PE(14:0e/21:1)	0.631389			718.573	466.417	0.421915	1.16681	1.09098	0.384856	1.11116	0.653801	0.607094	0.76934	1.97407	2.41632	1.11567	1.28255	1.10135	1.39739	1.40267	0.800357	0.688524	1.23028	0.519695	0.877679	1.05063	1.97814	1.2749	2.57923	0.627503	1.19703	0.770652	0.792821	0.627762	0.898368	0.310033	1.14216	1.92507	0.904064	1.45252	1.04608	0.759054	0.667094	3.45133	0.65524	1.82077	1.24399	0.902437
7290	PE(18:5e/23:0)	0.631062			794.604	493.101	0.963334	3.8848	5.60511	2.87488	2.81303	3.45042	5.29229	5.6839	7.66147	5.86951	6.3903	3.96673	3.91833	5.25506	4.16335	4.33114	3.33981	3.94256	4.56398	6.97385	4.54719	7.46488	2.88531	5.7171	2.10461	4.40341	2.91351	4.17389	2.98415	4.2927	5.30019	3.73387	7.54427	7.13371	4.92476	2.27925	7.50847	4.34932	7.50351	2.44327	3.16878	4.64145	4.157
6826	PE(18:2e/21:2)	0.623282			768.588	451.989	5.18108	23.5196	17.0637	20.1301	25.573	24.328	31.8322	27.9414	30.325	31.1478	30.9947	17.1805	21.0719	31.231	25.533	23.0919	20.0476	25.6308	27.2221	31.9395	24.5492	30.6009	20.3655	52.8093	15.7537	23.9729	16.8482	29.1584	32.4166	25.4049	33.0172	23.2292	48.0948	36.7466	26.3117	24.3037	52.9902	36.0935	36.1491	11.931	24.0986	30.0148	27.3934
3044	DGTS(8:0/8:0)	0.622996			488.385	87.974	0.0230321	0.0202423	0.000660185	0.0343224	0.0066063	0.046032	0.0346053	0.025251	0.00813576	0.0214566	0.00548206	0.00285301	0.015859	0.0382992	0.0365199	0.023358	0.0140391	0.0227483	0.00413072	0.00959536	0.0196614	0.022953	0.0241934	0.00280321	0.00686096	0.029122	0.0110932	0.0260035	0.00188742	0.00598665	0.00205889	0.0229538	0.0662385	0.0207454	0.0162859	0.0149843	0.0228025	0.0240171	0.0118776	0.0245256	0.0209768	0.0189185	0.0076305
10166	TAG(18:1/20:3/22:6)	0.611612			972.8	689.96	0.302825	2.00273	0.676398	0.417701	0.304481	0.299065	1.51843	1.2937	1.71763	3.05236	2.95781	3.2199	2.77083	2.24039	0.513429	0.414751	0.381509	1.45259	0.529564	0.535481	1.33008	1.49263	0.605048	3.06806	0.952804	0.984747	0.387961	1.22074	0.737519	1.0123	0.418072	0.981404	1.34987	1.48003	1.35983	0.875257	2.61522	2.5366	0.61921	0.74984	1.40878	1.2428	2.07671
9563	TAG(16:0/20:4/20:5)	0.611084			918.752	668.202	0.0954569	0.157936	0.122859	0.161046	0.0537867	0.0583049	0.0855617	0.076711	0.335074	0.249733	0.329619	0.237829	0.182283	0.167266	0.0644409	0.110652	0.0786991	0.161263	0.0703111	0.069954	0.143439	0.188815	0.0765117	0.119459	0.109021	0.0761448	0.0820296	0.213812	0.139046	0.253917	0.0662998	0.103415	0.198594	0.371149	0.0988656	0.194941	0.204021	0.233191	0.120377	0.17685	0.0918355	0.155915	0.136256
7330	PE(18:4e/23:0)	0.600833			796.62	504.224	1.37495	3.80361	4.24778	4.40283	5.07197	5.71652	6.7617	5.54207	6.37847	6.88053	6.17733	3.92602	4.57301	6.52117	4.9823	5.46921	4.84337	4.88713	5.47311	7.02474	5.20289	7.27363	4.35221	11.938	3.08776	4.89192	3.50568	5.97681	6.8043	6.76566	6.45462	4.07471	11.9948	7.18829	4.67395	4.28293	11.0732	8.18358	7.83303	2.94624	3.50605	6.34037	5.64935
6729	PE(18:5e/21:2)	0.598299			762.505	411.753	0.391273	0.714384	0.68811	0.655431	0.756421	0.832746	0.820851	0.873631	0.728028	0.771726	0.615175	0.642774	0.776109	0.792286	0.83543	0.74449	0.780659	0.659552	0.852554	0.840187	0.738591	0.698624	0.701068	0.640673	0.636561	0.591431	0.663704	0.642912	0.813937	0.768306	0.850146	0.7592	1.51452	0.815113	0.680309	0.593219	0.885481	0.915746	0.749547	0.497669	0.795475	0.760682	0.661961
5592	PE(14:0e/19:0)	0.595487			692.551	446.335	0.0122666	0.268498	0.0645241	0.273427	0.196803	0.241572	0.360766	0.200726	0.253688	0.233529	0.314064	0.270679	0.185723	0.634278	0.465136	0.534995	0.250193	0.269732	0.288402	0.333964	0.282648	1.20089	0.210095	0.847835	0.235407	0.226597	1.49786	0.322437	0.540839	0.254478	0.356836	0.266732	0.47727	0.263219	0.265757	0.576358	1.1028	0.652948	0.825964	0.124873	0.391797	0.532049	0.375922
2067	ACar(15:1)	0.587156			384.31	77.8586	0.0417722	0.0453107	0.0331449	0.0691997	0.0197699	0.0377415	0.0364084	0.0458964	0.0455185	0.0215913	0.021254	0.0377057	0.0425054	0.0386722	0.0419374	0.0402992	0.0296161	0.0225482	0.0379925	0.0380113	0.0373448	0.0608721	0.0744364	0.0416908	0.047844	0.054739	0.0359652	0.0362835	0.0411093	0.0222713	0.0385833	0.0452083	0.0463394	0.0264013	0.0346426	0.0352623	0.0464283	0.0225511	0.037321	0.0511485	0.0404504	0.0419774	0.039123
10266	TAG(18:0/20:3/22:2)	0.576752			982.878	753.168	0.290925	0.139682	0.392853	0.229871	0.122793	0.144485	0.10502	0.339916	0.118463	0.432141	0.163757	0.473182	0.199999	0.183402	0.113429	0.128686	0.12432	0.160742	0.155269	0.113719	0.206633	0.318343	0.0652806	0.128431	0.249645	0.0888521	0.078852	0.238325	0.177978	0.427034	0.0782969	0.199034	0.220086	0.320803	0.152005	0.314174	0.205577	0.166158	0.11855	0.193167	0.0938555	0.191722	0.179191
6892	PE(16:2e/23:0)	0.563404			772.62	510.563	0.548859	1.46863	0.668748	1.42537	1.22764	1.62894	1.42298	1.44582	1.21388	1.9004	1.22154	0.898174	1.23554	1.9722	1.79373	1.98803	1.30454	1.37912	1.42679	2.08076	1.41258	2.45342	1.28476	2.08663	0.822751	1.25963	1.10139	1.20165	0.870037	1.41428	1.79194	1.0581	2.47333	1.84559	1.25803	1.08626	1.9167	2.16963	2.23185	0.934963	1.37472	1.53178	1.35313
6202	PC(18:3e/15:0)	0.56228			728.563	396.337	0.222013	0.243437	0.253167	0.310434	0.249194	0.266173	0.232385	0.257724	0.24887	0.24117	0.290083	0.219295	0.212306	0.231864	0.246787	0.215009	0.263482	0.265877	0.24933	0.252487	0.248554	0.283399	0.206925	0.256798	0.213299	0.244853	0.23289	0.210653	0.266033	0.276096	0.268756	0.217791	0.379288	0.270507	0.2492	0.216628	0.28211	0.232079	0.231775	0.19757	0.240969	0.248881	0.249997
9201	TAG(16:0/18:2/20:5)	0.560242			894.755	677.7	0.312582	0.344692	0.350992	0.530481	0.139574	0.133848	0.200416	0.142577	0.491577	0.438882	0.424708	0.614966	0.404711	0.277219	0.149993	0.25543	0.184458	0.396343	0.147127	0.108004	0.302429	0.444576	0.18627	0.157667	0.277993	0.204189	0.142142	0.360194	0.352849	0.711584	0.111781	0.428046	0.300795	0.622017	0.17589	0.378322	0.376592	0.456895	0.246315	0.486423	0.189901	0.330522	0.290958
10013	TAG(18:0/18:1/22:2)	0.558907			958.876	750.486	0.260595	0.303526	0.315974	0.5568	0.23528	0.196407	0.23109	0.173034	0.329974	0.717081	0.301757	0.391317	0.366546	0.381237	0.17408	0.19304	0.191939	0.470013	0.198628	0.160536	0.307443	0.874313	0.181421	0.218099	0.380438	0.199287	0.238777	0.372963	0.325324	0.484295	0.132693	0.297806	0.470666	0.488755	0.181506	0.350435	0.291283	0.369691	0.289567	0.302071	0.28808	0.336873	0.270124
10605	TAG(20:3/22:5/22:6)	0.551241			1020.8	672.839	0.00605016	0.139012	0.0556689	0.0117768	0.0265844	0.0165072	0.112938	0.0609619	0.29018	0.497982	0.351323	0.0544568	0.262893	0.197896	0.0709322	0.0216665	0.0453489	0.0818307	0.0316146	0.0404313	0.118803	0.0879648	0.0709858	0.257482	0.0758221	0.0343698	0.0339164	0.135994	0.0557126	0.0759852	0.0470884	0.0657562	0.114972	0.189092	0.287352	0.0904489	0.136859	0.133457	0.045818	0.0186733	0.0647981	0.101127	0.112639
7260	PE(20:4e/21:2)	0.541771			792.589	437.671	0.802135	2.32707	1.45592	0.735608	1.44844	2.29614	3.37139	1.97696	5.58721	3.50428	4.05113	3.67324	0.781007	3.96165	0.878945	2.5579	1.54522	1.29826	3.6189	1.07431	2.34729	4.23302	2.43464	7.48239	0.478943	2.86262	2.22218	1.94625	3.61744	1.79242	1.33706	2.9603	4.21076	5.45199	3.91377	3.09048	7.16575	4.21062	5.59372	1.95944	3.39458	3.51792	3.52896
5017	DAG(16:0/22:6)	0.541255			658.54	483.072	0.380567	1.81175	1.20488	1.23563	1.49832	1.13954	1.29736	2.43668	2.73588	2.2747	2.59485	1.99984	3.75137	2.39225	2.30662	1.91857	1.65258	1.54795	1.4454	2.27156	1.89481	2.50126	1.71168	1.59426	1.12767	1.6852	1.20424	1.29349	2.22345	1.14003	2.05894	1.49252	1.60946	1.40502	1.72682	1.39801	1.3382	1.60501	2.55075	0.951298	1.81836	1.62178	1.73736
8281	TAG(14:0/16:0/20:4)	0.540221			844.737	687.804	0.073281	0.11024	0.0905568	0.184744	0.0809781	0.0908979	0.116973	0.10004	0.16883	0.144148	0.130084	0.234154	0.234241	0.136046	0.0912656	0.144876	0.0851057	0.198714	0.0641056	0.089656	0.128447	0.165415	0.0954646	0.0748096	0.140729	0.107449	0.098353	0.410271	0.128872	0.244642	0.0818875	0.172018	0.186601	0.148838	0.0836786	0.144125	0.163752	0.134295	0.116857	0.304792	0.0751037	0.153898	0.124159
7766	PE(22:5e/21:2)	0.538857			818.565	489.455	0.175155	0.448055	0.461004	0.495338	0.275177	0.4857	0.446368	0.531903	0.397654	0.461026	0.414946	0.273576	0.456565	0.633152	0.464141	0.327569	0.515558	0.446051	0.472466	0.463424	0.432241	0.39943	0.238756	0.365297	0.33194	0.545655	0.279043	0.511886	0.433257	0.621076	0.584818	0.446412	0.952843	0.547819	0.626101	0.36512	0.569897	0.513092	0.449004	0.285093	0.283584	0.467506	0.368649
8094	DGTS(15:0/26:2)	0.500687			834.713	576.398	0.0929058	0.234534	0.108445	0.174191	0.232935	0.202244	0.225559	0.23171	0.180511	0.260614	0.354746	0.138839	0.238685	0.373022	0.227189	0.218554	0.199186	0.189091	0.136844	0.348506	0.218415	0.3104	0.194545	0.283151	0.229123	0.222768	0.223719	0.25725	0.347858	0.206346	0.265411	0.225774	0.378251	0.299974	0.314904	0.230865	0.314029	0.323063	0.263282	0.0951625	0.199464	0.259267	0.248462
3858	DGTS(2:0/20:2)	0.500687			568.456	258.277	0.00427363	0.0144773	0.000127875	0.00923673	0.0226573	0.00225649	0.000502232	0.00883036	4.05889e-05	3.83816e-05	0.00992392	0.00180287	0.00607323	0.000430621	0.00672886	0.00576805	0.00127319	0.00310461	0.000858017	0.00206301	0.00502336	0.0146446	0.00777835	0.00402548	0.00247907	0.0126962	0.00311158	3.53307e-05	0.0159467	4.01253e-05	0.000704716	3.76689e-05	0.000546822	0.000138552	0.00590008	0.00136424	4.2441e-05	3.88996e-05	0.00237801	0.00139831	0.00270381	0.00380055	0.00424202
3158	DGTS(2:0/15:0)	0.500687			502.316	100.138	0.701688	0.747478	0.743258	0.768317	0.726924	0.733059	0.727192	0.699254	0.711202	0.728288	0.770491	0.755279	0.788819	0.805123	0.720048	0.6867	0.726453	0.725787	0.726382	0.691718	0.734173	0.839456	0.647141	0.774749	0.741703	0.746129	0.728128	0.734001	0.853596	0.785387	0.817087	0.750262	1.3061	0.830184	0.74225	0.759961	0.788967	0.83547	0.759195	0.706023	0.787221	0.796651	0.816263
6095	DGTS(16:4/18:5)	0.500687			722.503	78.406	0.0802089	0.0575464	0.0957933	0.17267	0.097354	0.543785	0.275346	0.199409	0.327728	0.272886	0.209851	0.158352	0.17129	0.582868	0.592387	0.175084	0.0591689	0.360973	0.109209	0.101066	0.232149	0.0805821	0.0898855	0.0948732	0.0757681	0.0660968	0.0675718	0.373391	0.0601617	0.168927	0.0569751	0.272285	0.374487	0.154127	0.190438	0.187654	0.230688	0.307538	0.279405	0.302421	0.41424	0.192376	0.163279
7002	PC(14:0/22:6)	0.491115			778.535	389.907	0.745131	2.02974	0.931623	1.91276	1.78229	1.24536	1.83321	1.67926	2.06457	1.62666	1.45421	1.55927	1.30947	1.4607	2.30181	1.70298	1.21607	1.3604	1.9739	1.90214	1.60458	1.53549	1.06368	1.73893	0.985935	1.66666	0.980519	1.10027	2.38498	1.42438	2.13251	1.51284	2.92249	2.11891	1.75041	1.03298	2.78928	2.29218	1.93663	1.81221	0.972027	1.70767	1.12764
4345	PS(2:0/21:0)	0.486154			610.407	131.16	0.0316604	0.0862437	0.0184796	0.0903086	0.0701639	0.0583993	0.0274077	0.0797941	0.0611268	0.0200134	0.0952738	0.0337502	0.0579455	0.0617931	0.0493221	0.0665764	0.0548756	0.0579387	0.0219652	0.0655487	0.0554293	0.0709052	0.0505326	0.0604241	0.0451455	0.0899328	0.0740758	0.0332872	0.0958515	0.0308757	0.0529121	0.0350868	0.0828683	0.0706236	0.0611745	0.0508821	0.0610458	0.0153922	0.0609171	0.0339602	0.0449565	0.0560425	0.0522658
7954	PC(22:4/18:5)	0.447491			828.551	402.224	1.02228	1.63925	1.93754	0.984743	1.65428	1.97853	1.74196	2.18851	2.39053	2.51759	2.26182	3.37545	2.34675	2.02507	2.36878	2.17347	2.50453	2.30175	2.05907	1.86027	2.06661	1.92933	1.85113	2.3691	1.60796	1.77853	1.88681	1.69323	2.02831	2.02964	2.46242	2.10981	3.80657	3.06664	1.83452	2.16881	2.12415	2.42744	2.40739	2.25101	2.42801	2.21304	1.92902
10513	TAG(18:0/22:3/22:3)	0.43332			1008.89	754.614	0.130847	0.109772	0.144781	0.133038	0.0585705	0.0828293	0.0554348	0.102625	0.0838204	0.209525	0.0921423	0.232935	0.0217686	0.104423	0.0973684	0.0771919	0.0617657	0.187743	0.0915319	0.139238	0.110868	0.132683	0.0412889	0.0776805	0.139976	0.0643862	0.0643113	0.130342	0.107106	0.194426	0.0488007	0.118278	0.169074	0.182062	0.112694	0.15272	0.166426	0.126371	0.0534614	0.108148	0.0466752	0.111845	0.087701
10252	TAG(18:1/20:3/22:2)	0.396518			980.861	739.592	0.449399	0.341593	0.624436	0.364003	0.198216	0.250705	0.214098	0.251798	0.391969	0.972015	0.473802	0.539974	0.39631	0.36249	0.216313	0.204577	0.210408	0.275929	0.290538	0.193175	0.361087	0.585332	0.179947	0.331542	0.458701	0.17883	0.21455	0.448813	0.356154	0.706598	0.182849	0.322206	0.505931	0.525151	0.29795	0.529152	0.38594	0.378683	0.252018	0.255654	0.253157	0.367458	0.356248
4520	Cer/NDS(d18:0/22:0)	0.356121			624.628	586.684	0.198002	0.122082	0.0882516	0.160837	0.149675	0.202077	0.131991	0.187425	0.352006	0.259695	0.235004	0.169914	0.242339	0.26955	0.227776	0.250814	0.210477	0.155293	0.209565	0.214368	0.201857	0.366782	0.187402	0.15474	0.164756	0.211974	0.108039	0.293952	0.159486	0.404061	0.312006	0.199365	0.233777	0.227548	0.132602	0.191847	0.275143	0.350049	0.221823	0.1443	0.187286	0.226347	0.209758
6503	PE(18:0/18:0)	0.342704			748.609	504.199	0.527464	2.92781	1.90612	1.91768	2.08059	2.14624	2.85581	2.49858	3.50768	2.81654	3.37959	1.41969	2.09678	2.98099	3.29223	2.86205	2.04489	2.56873	2.39511	3.40467	2.48146	3.52218	2.53235	3.07006	1.8025	2.13384	1.87338	2.53141	2.65657	2.06133	3.30303	2.22219	4.00402	3.56145	2.65484	1.8445	4.70173	3.34825	4.13583	1.03009	2.75039	2.787	2.62885
10498	TAG(20:3/20:3/22:1)	0.340697			1006.88	742.386	0.194502	0.176653	0.192047	0.166076	0.0854156	0.138533	0.0862263	0.133614	0.140055	0.0680371	0.182308	0.137329	0.0335021	0.16781	0.168695	0.0950698	0.0907742	0.165669	0.132948	0.100603	0.132793	0.234076	0.0865347	0.0668737	0.241738	0.0986736	0.0894467	0.223358	0.1581	0.281217	0.0882513	0.162487	0.300855	0.312517	0.16884	0.239178	0.274315	0.205837	0.0934175	0.106468	0.104489	0.176834	0.162636
6208	PC(14:1e/19:2)	0.328923			728.574	420.15	0.147722	0.0295252	0.0715801	0.0871466	0.0375358	0.0340017	0.0368821	0.0468668	0.00803884	0.0222341	0.0347347	0.0546559	0.0649217	0.0235754	0.0255484	0.0207373	0.0837222	0.0726955	0.0438988	0.0140269	0.0480025	0.0183507	0.0500534	0.0079088	0.0474332	0.0633959	0.0422385	0.0260268	0.0196961	0.0608613	0.023988	0.0101729	0.0883577	0.0179862	0.0574512	0.0228008	0.043262	0.0277996	0.0282242	0.0953657	0.037454	0.0394413	0.025495
3175					504.307	83.4433	0.0421274	0.219399	0.0496176	0.155075	0.295652	0.139257	0.125945	0.216948	0.164558	0.117689	0.245896	0.074253	0.359918	0.325427	0.157026	0.205948	0.126075	0.142051	0.127928	0.263825	0.177731	0.225332	0.185111	0.163973	0.145945	0.185316	0.135662	0.208171	0.26561	0.180372	0.16949	0.247308	0.391631	0.182014	0.467864	0.178504	0.309204	0.188816	0.401702	0.0987862	0.175044	0.225293	0.182885
3176					504.192	42.2666	0.0011452	0.00123608	0.00144822	0.00140493	0.000795665	0.00156627	0.00062252	0.000577323	0.00144133	0.0010301	0.00125272	0.000949952	0.00138198	0.00184227	0.00169767	0.00180929	0.00146024	0.00187451	0.00129145	0.00144773	0.00131377	0.00159833	0.00996239	0.00160202	0.00135939	0.00138247	0.000451693	0.00117584	0.00202363	0.00102239	0.000631034	0.000802331	0.00344481	0.00141009	0.000736432	0.00108087	0.00138018	0.00279257	0.00128208	0.000976429	0.000952153	0.00180336	0.00149455
6643					756.515	300.942	0.0480852	0.170515	0.0302087	0.170108	0.14114	0.108356	0.0543207	0.167395	0.0912881	0.0278018	0.165752	0.0428819	0.115664	0.103964	0.127018	0.198203	0.0800232	0.0771313	0.0441334	0.173809	0.10689	0.138626	0.112749	0.103696	0.0935404	0.136837	0.12651	0.0525754	0.192542	0.0380782	0.0846599	0.0687151	0.151649	0.114682	0.112552	0.0931357	0.110344	0.0349055	0.0880854	0.0450126	0.109626	0.100426	0.102597
8202					840.573	240.182	0.0671006	0.184095	0.0179575	0.173336	0.0977529	0.09505	0.106668	0.157528	0.0648384	0.0168994	0.125577	0.0559534	0.143984	0.228992	0.110122	0.14544	0.0783061	0.0775401	0.026293	0.164902	0.106917	0.0977661	0.0944871	0.117933	0.0530124	0.115349	0.118284	0.0395755	0.120965	0.031871	0.0568725	0.0756764	0.144164	0.0855676	0.131647	0.0775468	0.0838533	0.0209327	0.0774596	0.0339203	0.0967958	0.083684	0.0797851
7805					820.618	474.693	0.100932	0.336284	0.358028	0.246446	0.288531	0.322887	0.454418	0.44342	0.605175	0.536824	0.469706	0.170891	0.396393	0.523625	0.424703	0.294007	0.367895	0.407908	0.509621	0.522713	0.38902	0.484582	0.290367	0.609172	0.161004	0.271179	0.214136	0.367758	0.343233	0.446999	0.602398	0.273276	0.756487	0.446301	0.439468	0.306767	0.708236	0.580362	0.60823	0.213721	0.365142	0.424441	0.404281
7674					814.559	232.181	0.319099	1.05901	0.137021	0.923367	1.0818	0.531682	0.217919	0.787707	0.442609	0.052057	0.854731	0.262616	0.533092	0.424804	0.705856	0.899478	0.442046	0.44476	0.166802	0.656757	0.547161	0.744413	0.53213	0.523115	0.338431	0.862299	0.543134	0.161823	0.970203	0.186378	0.161021	0.315769	0.768794	0.511173	0.530463	0.507051	0.266574	0.136585	0.434388	0.223763	0.454949	0.458623	0.364132
6388					740.546	352.419	0.019539	0.0588721	0.0420468	0.352402	0.0522806	0.0444002	0.0381086	0.0537789	0.0711879	0.0444157	0.0566105	0.0670709	0.0463094	0.0698402	0.0505606	0.0711577	0.025378	0.0331329	0.0492079	0.0710807	0.0658691	0.0777989	0.0432301	0.0535694	0.0250951	0.0624252	0.0368282	0.0681783	0.0587044	0.114523	0.0531911	0.0425889	0.235926	0.0907307	0.0617916	0.0442002	0.0822515	0.0560638	0.0414812	0.0272723	0.049418	0.0662634	0.059273
7727					816.536	191.873	0.00957712	0.0346629	0.00320285	0.0445293	0.0388207	0.00497397	0.00739852	0.0431067	0.0200666	0.00209357	0.0336192	0.0137339	0.0307008	0.0164843	0.0255048	0.0244197	0.0181077	0.0210138	0.00494433	0.017152	0.0207056	0.0270968	0.0240385	0.0135413	0.0133078	0.0350941	0.0239864	0.00645218	0.0299767	0.0051838	0.00202511	0.00898995	0.02526	0.0196852	0.0245723	0.0167188	0.00583213	0.00106841	0.010313	0.0142852	0.0139295	0.0160679	0.0145285
7804					820.62	461.413	0.214107	0.462442	0.479408	0.376884	0.56865	0.585661	1.02958	0.97952	0.595755	0.814657	0.508727	0.39519	0.431346	0.687398	0.617317	0.332282	0.340425	0.496503	0.624564	0.948612	0.574452	1.12394	0.438415	0.784698	0.0437563	0.435492	0.359161	0.823008	0.745187	0.428783	0.731954	0.489251	1.30062	0.536383	0.580513	0.361413	0.640234	0.773173	0.94816	0.345082	0.859683	0.637445	0.584487
2168					394.289	51.8403	0.0411436	0.0692787	0.0454494	0.0614332	0.0428813	0.0224293	0.0202757	0.0509849	0.0127166	0.0218648	0.0479585	0.0193865	0.0195292	0.0212751	0.0216438	0.0193977	0.0247829	0.0207108	0.0210237	0.0282282	0.0316197	0.0488322	0.101695	0.0420249	0.0634625	0.059751	0.0664195	0.0597261	0.0821228	0.0466104	0.0402316	0.036039	0.106456	0.0421408	0.0195586	0.0194147	0.0192875	0.032802	0.0264444	0.0205018	0.0130183	0.0473269	0.0581945
7728					816.573	321.018	0.0294854	0.0632497	0.0278065	0.252927	0.083163	0.0562594	0.0440758	0.0681422	0.0562229	0.0311077	0.0903257	0.0298096	0.0397152	0.0605	0.057222	0.0776279	0.0285787	0.0558279	0.0309521	0.0773899	0.0630195	0.0954085	0.0435486	0.0614311	0.0245991	0.076395	0.0592022	0.0313375	0.122672	0.0380791	0.0468296	0.0279615	0.0778753	0.0616566	0.0389531	0.0376315	0.0680776	0.0351627	0.0552683	0.0153464	0.0480227	0.0532729	0.0624651
7726					816.573	301.704	0.0393061	0.208858	0.0400762	0.162329	0.146019	0.0691398	0.0565912	0.101516	0.0869876	0.0411589	0.158383	0.0466596	0.0899089	0.0981793	0.0828603	0.135271	0.0896839	0.0731859	0.0387733	0.110406	0.0937647	0.162146	0.0582303	0.0989987	0.0576721	0.141447	0.0995827	0.0508335	0.214397	0.0507207	0.0703636	0.0667871	0.0981084	0.0978598	0.104355	0.0821082	0.115852	0.0376897	0.0843793	0.031302	0.076949	0.0899891	0.0982074
6410					742.527	387.324	0.388004	0.69283	0.592144	1.08148	0.789329	0.828786	0.760734	0.795417	0.728654	1.20126	0.801418	0.34158	0.69333	0.936282	0.660097	4.32852	0.564787	0.443749	0.850507	0.834342	0.915662	0.609337	0.998009	0.964605	0.928371	0.502898	0.588968	0.597465	0.85072	0.957672	0.722357	0.737272	1.21114	0.752706	0.741915	0.795287	1.17085	0.977771	0.595757	0.312712	0.872055	0.794394	0.624897
9337					902.813	714.122	2.87233	1.7488	3.24862	4.68372	1.55877	1.74056	1.53498	2.17603	4.02473	7.71561	3.76017	6.929	5.0237	3.83783	3.1237	5.79218	3.40231	6.80057	2.87831	2.51015	3.7681	2.82185	1.37146	1.1708	2.32943	2.53715	1.2423	1.89605	2.38645	3.85539	1.63742	2.04223	2.29284	2.67579	1.31332	2.79807	2.10738	2.31272	3.19777	6.76758	3.61823	2.51871	3.19709
9333					902.727	691.553	0.693234	0.904135	1.03499	2.17969	0.624017	0.810677	1.36305	0.544349	1.15968	1.52154	0.982788	0.33002	0.851456	0.794413	0.451376	0.780745	0.488863	0.969868	0.943876	0.600735	0.901475	1.09852	0.654978	0.679599	0.864232	0.99863	0.595709	1.08435	0.962031	2.01784	0.584799	1.19499	1.26462	1.79994	0.59673	1.02117	1.67462	1.33531	0.461876	1.07707	0.521088	1.02441	0.860809
6639					756.516	287.185	0.136832	0.436619	0.0696462	0.666744	0.335507	0.350866	0.103291	0.462881	0.235402	0.0537772	0.387854	0.111837	0.307627	0.177076	0.2975	0.41441	0.277834	0.220506	0.139035	0.384424	0.278483	0.288073	0.388079	0.24492	0.317706	0.390554	0.239262	0.107611	0.653375	0.119832	0.174079	0.239339	0.415706	0.256688	0.27115	0.328516	0.178345	0.0502314	0.330216	0.125623	0.203537	0.266142	0.230805
6636					756.552	267.971	0.0286492	0.086563	0.0112506	0.0767062	0.0778495	0.0433181	0.0222418	0.0434453	0.0554937	0.0146878	0.0653741	0.0203396	0.0420184	0.0540973	0.0371633	0.0792524	0.0367235	0.0336767	0.0129522	0.0518865	0.0446845	0.0866549	0.0374243	0.0417633	0.0393489	0.0502673	0.0722023	0.0187314	0.0909716	0.0188938	0.0266074	0.0249271	0.0428673	0.0316326	0.0434911	0.0477296	0.039656	0.0210656	0.0430007	0.0290242	0.0477107	0.0426985	0.040006
5998					716.523	419.637	5.18374	13.2143	10.4669	15.7128	13.6861	15.0311	15.14	12.9699	13.1653	17.7148	13.2083	7.92796	12.8452	19.5084	15.2046	16.5791	10.7959	9.97879	16.0686	18.2014	13.6302	17.536	11.8429	13.1878	12.8342	10.7118	13.9274	12.9931	18.7839	12.104	13.3965	16.0239	20.1817	15.191	12.2169	12.751	19.766	21.9444	14.6935	8.31717	15.6676	14.7035	14.6056
7182					788.542	262.715	0.0737412	0.203743	0.111665	0.271647	0.188267	0.139508	0.0932373	0.150023	0.117891	0.109725	0.217763	0.0691546	0.106952	0.119315	0.118544	0.233438	0.0765503	0.117735	0.0858998	0.231041	0.141792	0.258656	0.122735	0.167097	0.068622	0.15409	0.141704	0.0996159	0.238871	0.107192	0.134118	0.105754	0.199472	0.145408	0.1331	0.105618	0.217538	0.158364	0.111729	0.0519673	0.102583	0.141212	0.134262
7768					818.531	302.559	3.3905e-05	0.0455914	0.00856107	0.0160978	0.0149086	0.0300823	0.0180484	0.035065	0.060745	0.00876799	0.0261649	0.00629727	0.00583674	0.0322647	0.0120873	0.0620135	0.0172989	0.00330532	0.0130565	0.0473187	0.0231773	0.0195104	0.0213055	0.0584079	0.0156734	0.0453367	0.0173507	0.0261132	0.0674994	0.0172936	0.0474492	0.0451471	0.0486189	0.0903045	0.0489091	0.0211628	0.0469871	0.0180436	0.0109928	0.000669675	0.00840711	0.0337591	0.0329785
2715					450.358	95.3071	0.00386517	0.0505814	0.0103151	0.0240361	0.0206864	0.0410689	0.113138	0.206033	0.904488	0.264814	0.316422	0.175387	0.253165	0.607423	0.0933322	0.245485	0.0499941	0.247827	0.273953	0.364418	0.213322	0.0198234	0.0169987	0.360408	0.0308457	0.0588773	0.0187407	0.141059	0.084609	0.127707	0.169461	0.0521468	0.038333	0.41985	0.142766	0.0405221	0.346371	0.563635	0.127716	0.0728441	0.242318	0.153752	0.179362
7646					812.541	303.055	0.0107109	0.0526714	0.00682077	0.0340844	0.0420533	0.024531	0.018092	0.0477233	0.0432847	0.0145062	0.0403872	0.0190127	0.0274796	0.0279403	0.0278624	0.0451518	0.0225429	0.0236419	0.00979779	0.0464434	0.0292369	0.0343423	0.0226063	0.0356072	0.0246836	0.0526306	0.0273949	0.0196141	0.0703219	0.0131642	0.0341659	0.023023	0.0465907	0.0450072	0.0545484	0.0234092	0.0383191	0.0191668	0.0253993	0.00902864	0.0233263	0.0321175	0.0296963
7641					812.541	284.731	0.0356181	0.4577	0.0319029	0.113162	0.17022	0.122464	0.0425707	0.423638	0.0989088	0.0463757	0.122079	0.0575789	0.0807681	0.104014	0.0754756	0.101963	0.0482434	0.098983	0.0337514	0.0942842	0.117985	0.0983216	0.0757797	0.224176	0.0440606	0.395617	0.186796	0.062747	0.22921	0.0343663	0.0805391	0.092431	0.10327	0.109702	0.122709	0.0575832	0.0728656	0.0563054	0.0584722	0.0208593	0.0572567	0.109153	0.0840176
7644					812.541	270.762	0.0370395	0.163469	0.0313635	0.144266	0.134136	0.0748652	0.0417871	0.141847	0.0980808	0.0278291	0.122795	0.0487837	0.0800053	0.067443	0.09925	0.118659	0.0660188	0.0746021	0.0305516	0.111865	0.0857328	0.0928936	0.0744522	0.105548	0.0570142	0.141073	0.0713703	0.0408241	0.155709	0.0360329	0.0741173	0.0563915	0.106068	0.0925293	0.0857492	0.0649594	0.04907	0.0291446	0.0502044	0.0306884	0.0761591	0.0744999	0.0805588
7643					812.541	255.803	0.0590195	0.0772808	0.0752941	0.0909864	0.0709283	0.0754947	0.051956	0.0797443	0.0993195	0.0492375	0.0853675	0.0329873	0.0532827	0.0530426	0.0533857	0.0732356	0.0426399	0.0665444	0.0452793	0.116227	0.0675627	0.0556379	0.0554043	0.0933215	0.03315	0.0836574	0.0415288	0.0470212	0.0932611	0.0470964	0.0602178	0.0557592	0.160117	0.0689653	0.0619653	0.0414811	0.0926022	0.0451032	0.0464856	0.0283818	0.0397385	0.0625448	0.0601657
3587					546.282	50.6228	0.00155355	0.0213655	0.014205	0.0328888	0.0196963	0.0267623	0.0322953	0.025948	0.0472496	0.0322799	0.0491218	0.00799651	0.0191862	0.0445184	0.0263878	0.0334202	0.0136838	0.01824	0.0274547	0.0305179	0.0262386	0.0389855	0.0213265	0.0734858	0.0083177	0.0307323	0.0138078	0.0384295	0.038314	0.0213349	0.0587165	0.0325773	0.0479127	0.0455631	0.02009	0.017407	0.109717	0.0382169	0.0325011	0.00284266	0.013792	0.0352035	0.02822
7181					788.52	365.43	0.638049	5.12829	4.68592	2.86966	3.01284	5.32004	5.48448	8.57109	9.52143	10.4287	7.37624	2.9087	3.98053	10.4717	4.84605	5.61962	3.56675	2.48584	5.46932	8.06947	5.52273	4.13749	6.0111	8.76655	3.54072	3.42731	3.44785	5.73294	7.38385	4.20872	8.80312	6.67714	8.7843	11.3618	9.86631	4.64604	12.6558	9.19536	6.59541	1.37156	3.56655	6.50899	5.79771
9055					886.555	242.989	0.000305656	0.0224771	0.00582158	0.00504359	0.00890106	0.00510173	0.0104398	0.020816	0.0294718	0.00944149	0.0154836	0.0118448	0.0023004	0.0201429	0.0131038	0.0131617	0.00716718	0.00808669	0.00472512	0.0207487	0.0117292	0.0161881	0.00858389	0.0303441	0.00892017	0.0155372	0.0118263	0.015501	0.0161799	0.00794722	0.00763506	0.0168266	0.0344651	0.0144384	0.0135241	0.0121505	0.0149179	0.0139771	0.0165822	0.00126054	0.0153547	0.014608	0.0139649
9052					886.548	227.217	0.00125062	0.0318758	0.00867863	0.0101718	0.0142249	0.00995023	0.0126374	0.0359887	0.0443676	0.0114562	0.0244378	0.0181799	0.00565169	0.0263657	0.0201094	0.0244982	0.0178417	0.0108578	0.00761089	0.0296874	0.0182921	0.0229958	0.0156658	0.0528745	0.00884685	0.0235122	0.0211133	0.0163499	0.0284871	0.0116897	0.0194364	0.0215207	0.0400963	0.0226864	0.0263811	0.0189708	0.0284058	0.0222939	0.0284455	0.00686027	0.0218589	0.0229246	0.0195353
6755					764.522	378.574	1.79662	8.29777	7.32799	9.91878	6.75213	11.6279	11.5136	11.7549	12.5333	13.3709	8.61729	4.15459	6.32363	14.2225	8.48777	11.5843	6.44895	4.41461	10.685	13.2302	9.15313	8.4897	8.93841	10.2247	6.88212	6.1277	7.51624	10.027	11.0066	9.70449	9.23826	12.6002	19.1518	13.5068	9.07136	7.5167	20.2461	17.0565	7.21529	2.89788	6.48792	10.1953	9.01436
8154					837.684	522.13	0.0432186	0.739041	0.331654	0.610694	0.332033	0.425961	0.600378	0.547984	0.402223	0.584945	0.962665	0.198583	0.525968	0.992705	0.721465	0.573646	0.626491	0.31883	0.616971	0.952074	0.555376	1.06664	0.352347	0.393059	0.447082	0.409898	0.428354	0.568748	0.694808	0.223061	0.639094	0.430168	1.12182	0.531232	0.734624	0.384579	1.4281	1.34937	0.836102	0.0951945	0.476484	0.630538	0.631634
3393					526.292	72.0401	0.379516	1.50326	0.30734	0.777113	0.891826	1.38422	0.787142	1.56125	1.30215	0.556494	1.78915	0.716693	1.23709	1.26301	1.30728	1.67554	0.974752	0.828516	0.575864	1.46079	1.06395	1.7035	1.25097	1.45053	0.880176	1.24928	1.16636	0.786049	1.76567	0.579139	1.24313	1.00779	1.87959	1.3778	1.63477	1.15925	1.63443	0.534325	1.75296	0.510093	1.11745	1.23416	1.1107
7258					792.574	365.77	0.0541469	0.391518	0.327005	0.5084	0.435426	0.571935	0.338089	0.458966	0.686781	0.74522	0.470517	0.274006	0.336392	0.583645	0.380409	0.416431	0.343342	0.246352	0.346269	0.81328	0.436407	0.488621	0.415401	0.497318	0.241399	0.407343	0.300334	0.411313	0.817771	0.511999	0.773551	0.522573	1.18846	0.778664	0.498088	0.354191	0.741521	0.56704	0.439887	0.163579	0.240163	0.517961	0.460322
7764					818.527	240.027	0.00179046	0.0211347	0.00126124	0.0352908	0.0401967	0.00325441	0.0074899	0.0163448	0.00955765	0.00668506	0.0244998	0.0028029	0.00379588	0.0264847	0.0136306	0.0502908	0.00770089	0.00364431	0.00602772	0.0327121	0.0157298	0.0381836	0.0152327	0.010106	0.0275494	0.0123533	0.0227838	0.00850882	0.0148266	0.00469215	0.013672	0.00374855	0.00902518	0.0164001	0.00910042	0.0112968	0.0417023	0.02022	0.0240031	3.37397e-05	0.00742956	0.0155434	0.0153464
8119					836.542	367.014	0.352614	2.87223	2.48235	2.03384	1.90951	2.71992	4.24275	3.50046	5.55682	4.12527	4.212	2.71443	2.50499	5.82676	3.72372	3.39144	3.5609	2.00206	3.82426	3.71276	3.26345	6.39169	2.65905	8.53523	2.70513	2.67831	2.43829	3.76488	3.77898	3.24821	5.67651	3.30435	4.98646	4.90108	4.43654	3.16961	8.25891	5.42488	5.34104	1.72517	2.69361	4.30589	3.22548
6350					738.504	350.349	0.0911623	0.410613	0.172223	0.327368	0.270413	0.296413	0.230529	0.348223	0.314662	0.383042	0.344775	0.0970688	0.240373	0.397359	0.312172	0.456127	0.162025	0.172893	0.254774	0.40564	0.284393	0.303829	0.367352	0.245851	0.231395	0.241788	0.215574	0.230376	0.533072	0.284123	0.225428	0.294118	0.464799	0.298755	0.333071	0.250617	0.464402	0.437851	0.255273	0.0956513	0.275463	0.302439	0.263463
5973					714.498	359.619	0.0180767	0.0967468	0.0148478	0.081786	0.103792	0.0411738	0.0161558	0.0976664	0.0312049	0.0105664	0.0906888	0.0361491	0.0636947	0.0431226	0.0730902	0.0529152	0.035709	0.0577341	0.0135922	0.0409029	0.0509808	0.0953316	0.055419	0.0373331	0.0447194	0.080271	0.0468567	0.0141035	0.0980385	0.0128764	0.0306676	0.0204123	0.0434947	0.0121154	0.0427662	0.0297665	0.0265569	0.0121535	0.0415717	0.0282733	0.0478715	0.0410299	0.0446488
5967					714.499	328.695	0.0379484	0.267082	0.0446466	0.161665	0.18367	0.0732398	0.0380239	0.202053	0.0632277	0.0163973	0.187053	0.0438622	0.209756	0.187813	0.132288	0.125161	0.0496473	0.0864735	0.019153	0.0934918	0.111133	0.329775	0.113085	0.0890915	0.0699016	0.177472	0.0961669	0.0271711	0.224725	0.0171988	0.0614673	0.0313929	0.0545969	0.026723	0.128099	0.0530788	0.037452	0.0493838	0.104259	0.0331294	0.133611	0.092889	0.0899148
7179					788.542	316.865	0.0134637	0.0436668	0.0393032	0.0439879	0.0381598	0.0503936	0.0494908	0.0566535	0.0982999	0.0637288	0.0502246	0.0578609	0.0363426	0.0622729	0.0579949	0.0667003	0.0400915	0.0414874	0.0487291	0.10103	0.0529941	0.0710756	0.0400913	0.0475278	0.0493875	0.0680928	0.0430344	0.0823714	0.0720755	0.0571444	0.104625	0.0778106	0.0859143	0.0951744	0.0630288	0.037683	0.104743	0.0807846	0.0389387	0.0202528	0.0355551	0.0637656	0.056061
6760					764.521	283.199	0.00906206	0.0370552	0.00345893	0.0351608	0.0215487	0.0276286	0.0083706	0.0367488	0.0115698	0.00239001	0.0271743	0.0045245	0.019136	0.0030764	0.0247765	0.0361037	0.0120942	0.00999096	0.00402441	0.0253912	0.0179643	0.0243958	0.0231345	0.00255295	0.018262	0.0268542	0.0223161	0.00697907	0.0294191	0.00272092	0.00894285	0.00783454	0.0268074	0.0195422	0.0249373	0.0199163	0.0155216	0.00409265	0.0130087	0.00548149	0.0149887	0.0158854	0.0171508
6783					766.536	417.521	7.84742	16.9748	18.986	21.5216	15.5815	20.9467	17.9068	20.4575	26.4518	19.0992	17.5428	15.5731	17.1668	20.3778	20.0798	28.2418	14.9231	13.719	23.8703	24.6231	19.0945	18.1992	15.4187	16.9002	17.1523	17.9282	17.1648	19.9628	17.0368	19.7532	21.8798	23.0211	25.8801	28.5885	16.3984	16.2963	26.2145	22.1199	16.0307	11.926	18.7633	19.3317	18.5495
6786					766.535	400.07	0.795965	3.2367	1.8751	3.27283	2.32618	2.21953	3.13418	3.14629	3.23326	3.58924	2.86808	1.86694	3.58219	5.71635	3.04641	3.28043	2.46431	1.86846	2.9667	3.93424	2.92117	2.95356	3.00622	2.47988	3.12632	2.57273	2.63949	4.09354	4.69633	3.13911	2.64879	3.8207	6.96206	3.27986	4.16475	3.11594	5.0419	5.62915	2.89318	1.61856	3.04365	3.54629	3.31496
3573					544.346	100.269	0.233606	0.298243	0.149199	0.263647	0.271982	0.256519	0.23476	0.261404	0.34514	0.290271	0.274374	0.234812	0.277264	0.3182	0.239662	0.373894	0.253925	0.291409	0.237237	0.344721	0.272513	0.308437	0.233807	0.256523	0.27421	0.302032	0.288157	0.288345	0.265681	0.275008	0.245442	0.287586	0.476804	0.288752	0.273639	0.246324	0.430253	0.255153	0.325494	0.251667	0.251263	0.291229	0.247887
8620					862.778	703.062	0.0447879	0.0424468	0.0350112	0.0617987	0.0200743	0.0328471	0.0253354	0.0745762	0.0814493	0.123555	0.0388323	0.145003	0.198742	0.0817653	0.0553147	0.139734	0.050559	0.126241	0.0409505	0.045318	0.0732171	0.053587	0.0880832	0.0160367	0.0385892	0.0457518	0.0229644	0.0400683	0.0372395	0.0575565	0.0249352	0.0333331	0.0482885	0.0389064	0.0153203	0.037152	0.0408106	0.0335012	0.00228382	0.168246	0.0577644	0.0450209	0.0860506
7723					816.574	278.715	0.126351	0.963489	0.0678561	0.369629	0.313148	0.163075	0.111749	0.220351	0.313078	0.0489709	0.343912	0.216517	0.172022	0.168979	0.154724	0.267623	0.404394	0.149985	0.0672563	0.150578	0.239684	0.335453	0.352163	0.182238	0.116214	0.305885	0.216093	0.082004	0.376773	0.0865102	0.123547	0.109798	0.482127	0.147569	0.206495	0.152883	0.175628	0.129358	0.191844	0.0658448	0.144634	0.199153	0.161243
7183					788.541	241.157	0.0970076	0.304675	0.0590169	0.233795	0.348828	0.109851	0.0743354	0.218153	0.141426	0.0539132	0.259774	0.0956261	0.128285	0.168795	0.135029	0.260033	0.0904514	0.153091	0.0629777	0.148209	0.157164	0.317247	0.135928	0.0771737	0.0872514	0.288699	0.194764	0.0867722	0.338499	0.0602112	0.156776	0.00444822	0.125989	0.193704	0.173743	0.13044	0.205747	0.0886618	0.140052	0.0523435	0.140627	0.149954	0.161458
7178					788.541	220.577	0.302372	0.813804	0.164193	0.675411	0.883908	0.291462	0.162225	0.528719	0.341371	0.114522	1.54321	0.266971	1.12384	0.455773	1.01481	0.679257	0.236644	0.36753	0.161351	0.419756	0.527356	0.83244	0.394833	0.458459	0.276372	0.697083	0.558305	0.230052	0.896635	0.267598	0.59586	0.264978	0.370605	0.467323	0.434332	0.373045	0.580179	0.18826	0.401717	0.130905	0.35473	0.438686	0.391396
6759					764.516	419.644	0.0690384	0.149772	0.0718295	0.409478	0.591428	0.0739794	0.0357941	0.129908	0.239665	0.196262	0.133147	0.00775193	0.318554	0.129267	0.0787902	0.0334004	0.0715612	0.20948	0.0316714	0.162918	0.157185	0.0367948	0.371704	0.0640554	0.290578	0.0591575	0.605609	0.103838	0.0245716	0.291609	0.139547	0.0342591	0.924988	0.140808	0.200489	0.0236307	0.137162	0.076455	0.0650255	0.0282002	0.0128714	0.181568	0.104127
5831					706.594	420.173	1.90276	2.69553	2.99204	4.17637	2.49369	3.03871	2.61367	2.87667	2.36988	2.86638	1.53337	2.09784	2.8269	2.86403	2.63993	2.47121	3.40286	3.12141	3.22177	1.98509	2.7095	3.89399	2.23235	1.99767	2.49079	3.91126	2.03756	2.90505	2.86385	3.88453	3.25543	2.5035	3.50185	2.65509	3.12409	2.81219	2.60115	3.0723	2.41398	2.52773	2.86236	2.87734	2.85375
2754					454.379	118.858	8.54469e-05	3.85784e-05	3.40527e-05	0.000121493	3.72341e-05	0.000135583	0.000860562	0.0360267	0.035034	0.00305704	0.00544927	0.0014856	3.97844e-05	0.00397291	3.83622e-05	0.00671077	3.76125e-05	0.000114463	0.00482299	0.00064224	0.00493723	3.98652e-05	3.40005e-05	0.00303031	3.57366e-05	0.000495628	3.70593e-05	0.00333012	0.000367686	0.00320374	0.00733446	0.000245371	7.27554e-05	0.0628136	0.000423866	0.000101895	0.0236972	0.0540166	3.90918e-05	3.37397e-05	0.000344239	0.00798485	0.00335672
7896					824.763	709.013	0.169901	0.137005	0.118518	0.272014	0.0854372	0.104242	0.135072	0.263353	0.253177	0.255183	0.132774	0.655966	1.24835	0.383634	0.291412	0.429656	0.151872	0.644135	0.128339	0.166039	0.301304	0.194032	0.244109	0.0832746	0.218143	0.180942	0.0830324	0.145787	0.178577	0.228945	0.101223	0.209897	0.201611	0.157622	0.0953107	0.186834	0.162408	0.14357	0.363337	1.16208	0.169509	0.225512	0.303129
7215					790.536	404.577	2.359	19.0439	17.6288	9.01498	13.0169	12.8038	15.2119	26.6132	29.2802	26.3451	22.3324	20.3548	15.8577	21.115	22.221	20.5789	13.7785	9.67482	22.2649	22.0546	18.0775	20.8243	15.277	27.0586	15.1516	13.4156	13.4899	23.5434	18.3328	11.0105	27.8017	19.0428	27.2785	30.8267	27.7277	19.0588	30.0445	24.7134	22.4328	5.89974	20.1869	20.6559	18.7818
7890					824.769	726.898	1.10122	1.25856	1.49951	2.69418	1.21578	1.21522	1.5349	1.55024	1.77518	2.07836	1.31962	4.47025	4.40004	2.41888	1.58476	1.38106	1.03147	2.83415	1.17851	0.624566	1.85832	1.85378	1.03607	1.13435	1.88969	1.36548	0.788767	1.44257	2.14182	1.43515	1.1041	2.48548	1.86866	1.7356	0.76584	2.08134	1.51516	1.91722	1.97221	8.42759	1.21615	1.90885	1.99217
5745					701.558	350.257	3.88298	26.0645	19.2938	25.0863	20.2045	21.9158	25.3892	28.779	33.9734	25.3786	32.1667	13.2838	19.9201	32.8389	8.88934	32.0121	20.0678	18.2976	27.0209	38.7147	23.659	36.3683	16.6476	38.3235	17.6606	30.4605	19.6409	30.3479	34.9675	30.793	32.2474	30.358	47.5317	44.1791	26.4117	20.4508	65.9088	39.4253	26.4558	12.461	18.0731	30.9356	24.8755
7995					830.558	380.934	0.612291	2.28569	2.23897	2.18568	2.03359	2.54054	2.30494	2.78224	3.71545	2.82665	3.05158	1.71733	1.95505	3.02181	2.55168	2.60248	1.92852	1.86999	2.45394	3.02651	2.38525	2.7806	2.11659	3.46757	1.99848	2.23281	2.31554	3.04703	2.82081	2.75218	2.82311	3.01554	4.73428	3.78114	2.92466	2.19302	4.32656	3.53073	2.57812	1.19078	2.35687	2.84932	2.80675
6357					738.505	302.202	0.0217645	0.0990421	0.0236351	0.0938815	0.104584	0.0893885	0.0491197	0.094402	0.0539273	0.0175619	0.0860743	0.0314761	0.05793	0.0640084	0.0736608	0.0825151	0.0504379	0.0512817	0.0242861	0.105335	0.0637156	0.0885717	0.0738932	0.0684163	0.059093	0.104473	0.0735201	0.0439903	0.137707	0.0304344	0.0509833	0.0477406	0.11112	0.0747081	0.070936	0.0592232	0.0753545	0.0255288	0.0515099	0.034759	0.0726762	0.0677319	0.0645923
6351					738.505	275.875	0.0075338	0.0400344	0.001594	0.0321479	0.0317467	0.0412875	0.00859924	0.0518533	0.0130458	0.000844072	0.0419189	0.0062958	0.0234595	0.0165338	0.0265463	0.0325026	0.0195209	0.0175375	0.00162593	0.0440111	0.0229319	0.0346128	0.0267087	0.0180994	0.0158841	0.030234	0.0206394	0.010121	0.0424791	0.00383596	0.010779	0.0133174	0.0437445	0.0336647	0.0225295	0.0191433	0.0177602	0.00270376	0.0164929	0.00593329	0.0163789	0.0202531	0.0172244
5296					675.48	299.725	0.00165165	0.0344435	0.00437657	0.0328539	0.0297943	0.0095839	0.00411104	0.0392588	0.0200315	0.00416999	0.0400081	0.0153733	0.0268128	0.0300094	0.0300196	0.0207437	0.0178845	0.0269008	0.00341456	0.0226996	0.0207071	0.0327724	0.0181583	0.0128353	0.0146486	0.0241342	0.0181472	0.00193707	0.0434838	0.00923032	0.0139168	0.00879299	0.0080327	0.0187553	0.00811334	0.0131356	0.0179347	0.0129123	0.027556	0.0127947	0.0261722	0.0171732	0.0206107
8242					842.587	306.136	0.0733641	0.255072	0.0160008	0.256927	0.137062	0.154403	0.0502093	0.211096	0.0993255	0.0167421	0.194221	0.0430866	0.122307	0.10245	0.10166	0.18687	0.134024	0.108525	0.00820133	0.141431	0.120649	0.149241	0.129601	0.152208	0.0976067	0.198117	0.125167	0.0617631	0.214719	0.0139919	0.077787	0.0227674	0.255115	0.159827	0.148471	0.130695	0.12365	0.0205698	0.102611	0.0511383	0.0826444	0.115885	0.1049
8240					842.588	291.558	0.0554207	0.181757	0.0193453	0.161961	0.0936467	0.107813	0.0533853	0.145173	0.0902046	0.0169957	0.137966	0.0426874	0.0927366	0.0709285	0.0851385	0.118324	0.0774353	0.0732604	0.0241932	0.0820333	0.0865203	0.0903662	0.0851022	0.0963204	0.0805102	0.134744	0.104495	0.0347005	0.129033	0.0419646	0.0514832	0.0508447	0.184996	0.0859513	0.0964957	0.0814549	0.0732632	0.0216793	0.080596	0.0536593	0.0630445	0.0820353	0.0840101
6921					774.527	193.866	0.0909598	0.256145	0.0354681	0.267953	0.195595	0.222938	0.073657	0.324856	0.138079	0.0274312	0.274108	0.0809873	0.181786	0.131505	0.228716	0.238779	0.160233	0.153827	0.044248	0.276347	0.170181	0.16536	0.199385	0.164833	0.15729	0.242068	0.169188	0.0702939	0.367846	0.0765297	0.115771	0.117842	0.403596	0.190059	0.124267	0.192795	0.142346	0.0328749	0.137277	0.096225	0.113732	0.163979	0.158571
5813					705.589	420.151	4.93249	7.66087	7.03911	11.0759	6.54875	7.68407	6.68926	8.33634	6.59744	6.82689	7.45619	5.4975	7.44874	7.35516	7.25357	6.70717	8.88901	8.29261	7.61557	6.04751	7.29771	9.91927	6.00681	5.08648	6.91891	10.0429	5.44698	7.87436	7.04519	10.1564	8.10802	6.73803	10.191	7.13101	8.08491	7.1832	12.6587	8.01438	6.56914	6.69802	7.02971	7.84517	7.24689
7985					829.716	709.399	0.0779391	0.0731176	0.046565	0.0973641	0.0481127	0.0552388	0.0665087	0.126885	0.120254	0.0743839	0.0686369	0.221677	0.44523	0.1702	0.139787	0.176903	0.0829488	0.233786	0.0670421	0.0978711	0.124523	0.0944796	0.1169	0.0496342	0.10352	0.0992386	0.0503449	0.0686563	0.0787638	0.0823979	0.0568896	0.08923	0.112033	0.0770158	0.0529338	0.0828347	0.0873976	0.0683268	0.179808	0.321526	0.0833529	0.0977641	0.111358
8504					856.567	217.286	0.0547411	0.182441	0.0240644	0.137439	0.114548	0.0839649	0.0387327	0.175783	0.10229	0.0118501	0.168726	0.0564289	0.114303	0.0780454	0.116338	0.131823	0.0802883	0.0640483	0.0276716	0.127306	0.0945416	0.100852	0.0986332	0.0903508	0.0602985	0.18299	0.095259	0.0372404	0.156059	0.0318586	0.0592624	0.0504964	0.142889	0.0927293	0.112535	0.0711035	0.0682213	0.0116028	0.0795868	0.0478452	0.0681851	0.0828999	0.0883232
2734					452.394	102.458	0.00919149	0.00685296	0.0166406	0.0119836	0.00889103	0.0109451	0.0164632	0.0355189	0.0472611	0.022299	0.0211331	0.0826109	0.00700776	0.0125397	0.00788412	0.026307	0.00918266	0.0114824	0.0210807	0.0256403	0.0205458	0.0289316	0.0249469	0.0097571	0.0167685	0.0101198	0.0221863	0.00143741	0.0155519	0.0189322	0.00428486	0.00878673	0.0264523	0.0217618	0.0165812	0.00724185	0.0120066	0.0100531	0.00677604	0.0101493	0.0184797	0.0145603	0.0160666
7989					830.552	181.664	0.285309	0.508108	0.0561404	0.842907	0.81869	0.575601	0.221067	0.973572	0.593318	0.0565895	0.877884	0.137294	0.783827	0.754339	0.335107	0.755612	0.539238	0.240919	0.151543	0.360983	0.493402	0.575642	0.500479	0.202386	0.4021	0.981863	0.508464	0.247575	0.528368	0.0893646	0.16275	0.0137538	0.887108	0.246172	0.387219	0.498667	0.188693	0.0416454	0.490586	0.0988468	0.501662	0.377667	0.844838
5295					675.542	340.491	1.54228	4.74776	2.6429	4.85815	2.78378	3.58143	4.47876	4.62231	5.07292	3.21428	4.77997	2.74947	5.21354	6.34521	4.87234	8.60308	3.13794	3.14987	4.02308	5.10557	4.27623	8.33451	3.05586	4.10332	3.34816	4.6472	4.02312	4.29726	4.52633	5.9249	4.11697	4.65024	9.03254	8.38655	5.83397	3.76466	10.5957	6.49825	4.61548	2.59241	2.79459	5.2571	5.15841
9428					908.888	761.394	0.188338	0.12263	0.309492	0.285166	0.1685	0.146636	0.246605	0.130952	0.166627	0.242544	0.244616	0.350961	0.232173	0.311418	0.122107	0.230003	0.10906	0.176957	0.119928	0.112581	0.200865	0.396265	0.104375	0.158588	0.122638	0.123648	0.118056	0.15021	0.217364	0.690127	0.105695	0.195589	0.236753	0.178548	0.0758121	0.240695	0.173837	0.191976	0.270126	0.414613	0.117008	0.214096	0.192799
7990					830.551	208.224	0.161691	0.83268	0.0846853	0.444443	0.51173	0.346964	0.115216	0.590477	0.359177	0.0964393	0.534638	0.216641	0.419008	0.278665	0.437137	0.488097	0.437801	0.365141	0.0913527	0.494489	0.365324	0.455681	0.374735	0.432885	0.263516	0.513997	0.318684	0.148835	0.706768	0.118868	0.297935	0.274877	0.500765	0.358359	0.347246	0.259933	0.240327	0.0568855	0.3817	0.241072	0.293915	0.329349	0.455749
2413					422.32	52.2556	0.0243149	0.0351099	0.0203813	0.0330914	0.0233972	0.0112316	0.0110484	0.037009	0.0111479	0.0119056	0.0376155	0.0101792	0.0116631	0.010025	0.00930811	0.0157986	0.00960473	0.00981324	0.0120866	0.0212523	0.0182992	0.024908	0.0559288	0.0181316	0.0382934	0.0308983	0.0380428	0.0341374	0.0407536	0.0269183	0.0234698	0.0213761	0.0586156	0.021041	0.0184036	0.0108381	0.0135583	0.00969763	0.0204042	0.0115188	0.00890739	0.0262921	0.0274105
10121					968.791	625.399	0.00765973	0.0228415	0.00208161	0.01583	0.0122334	0.012474	0.0048979	0.0195288	0.0138626	0.000962374	0.0157628	0.00609382	0.0106546	0.01441	0.0151182	0.0170698	0.0118224	0.0163946	0.00419084	0.0210464	0.0122468	0.0238981	0.00786911	0.00226305	0.00750196	0.0139061	0.011041	0.00311118	0.0208148	0.00214663	0.00978168	0.00249816	0.00670667	0.009968	0.00899173	0.0112277	0.0120825	0.000687504	0.0107519	0.00686837	0.00953215	0.00908242	0.0105963
2993					482.404	97.9253	0.011258	0.00597964	0.133581	0.0516491	0.00438056	0.019406	0.0210083	0.036971	0.0102231	0.0207744	0.0226542	0.0136756	0.00763512	0.0593736	0.00360764	0.0180559	0.00209477	0.0201647	0.014608	0.0285419	0.0252821	0.0332193	0.00793956	0.0143601	0.00876296	0.0117963	0.0830445	0.0230927	0.0292904	0.00415176	0.0177165	0.00971113	0.0843599	0.0236725	0.0192551	0.0196445	0.0421785	0.0164696	0.0178093	0.00697583	0.0310134	0.0252232	0.0145203
7952					828.537	216.841	0.113881	0.34706	0.0381541	0.216377	0.30642	0.133032	0.0536314	0.278243	0.235347	0.0107142	0.208305	0.0719746	0.148751	0.0718976	0.247667	0.161357	0.173104	0.107167	0.054828	0.140622	0.155927	0.154764	0.12583	0.230326	0.0650036	0.381755	0.12816	0.0453447	0.485373	0.0385203	0.128575	0.0797474	0.153965	0.166602	0.257849	0.100609	0.147401	0.0178142	0.0795066	0.0259456	0.0913535	0.145222	0.14132
8569					860.54	239.002	0.00674233	0.0401855	0.059348	0.0283253	0.0284955	0.0369105	0.0397155	0.0840763	0.128937	0.0498909	0.0775325	0.0419455	0.0119359	0.0499024	0.0372929	0.0658691	0.0383696	0.0298763	0.0360076	0.116752	0.0504056	0.0259525	0.0407251	0.115348	0.0211101	0.046276	0.0269832	0.0437353	0.0519338	0.0379277	0.0462461	0.0557068	0.141118	0.0687797	0.0499881	0.0238955	0.0836786	0.0467027	0.0429174	0.0161871	0.0276606	0.0506436	0.0520216
5267					673.527	287.368	0.0613855	0.215896	0.0996006	0.178256	0.125482	0.176397	0.17592	0.112148	0.185075	0.145335	0.225722	0.116143	0.187037	0.212741	0.178023	0.282695	0.155204	0.149397	0.0992801	0.232568	0.165715	0.279047	0.137903	0.174701	0.135289	0.287881	0.156999	0.213819	0.201847	0.185992	0.160767	0.225931	0.295607	0.257147	0.157804	0.19779	0.389263	0.264672	0.200717	0.0633234	0.123828	0.205516	0.187581
5551					689.558	370.837	1.46603	4.229	4.2916	7.47003	5.12523	6.78063	6.04278	7.06121	9.28669	6.24666	7.74372	3.73752	6.92432	10.1423	5.78859	10.7879	5.64199	4.13633	6.85706	7.83724	6.37984	14.3239	4.90498	9.2713	4.72894	7.94723	5.50389	7.7244	7.09817	7.68411	7.75507	7.59096	12.8935	10.0782	7.81446	2.95932	16.9241	9.94543	6.99635	3.09722	4.36501	7.98033	7.12524
6670					758.532	254.285	0.0400503	0.184155	0.0129294	0.0910671	0.139803	0.100303	0.0436293	0.145255	0.0665922	0.004329	0.126548	0.0432187	0.143655	0.0924473	0.0850134	0.128073	0.0741612	0.0982941	0.0211468	0.0870816	0.0863877	0.144156	0.110094	0.0813727	0.0495326	0.144338	0.0970368	0.0418904	0.120337	0.0286276	0.0726763	0.0558665	0.164533	0.0880722	0.121829	0.103763	0.0761282	0.0146408	0.0694058	0.0499678	0.10246	0.0868364	0.0566798
9096					888.774	727.001	0.0454258	0.0638248	0.17771	0.264168	0.038968	0.0476276	0.0851697	0.0334687	0.254794	0.0521357	0.0676942	0.462972	0.041607	0.0419692	0.0262273	0.0258214	0.0217609	0.028693	0.22001	0.0272421	0.101364	0.12691	0.0982886	0.0932055	0.0537063	0.191183	0.0331176	0.0847285	0.123693	0.0985922	0.0749287	0.0873896	0.0666679	0.092166	0.0778968	0.175278	0.0575239	0.0551362	0.0348079	0.0716901	0.208621	0.0952765	0.056739
3325					520.326	96.4732	0.00131526	0.0159144	0.00122098	0.00542136	0.00170364	0.00776812	0.00615546	0.0256324	0.0184777	0.0112175	0.0213573	0.00253184	0.00819147	0.00706471	0.0101856	0.0627256	0.0115132	0.00813851	0.00763377	0.0793637	0.0156766	0.00820112	0.00458301	0.0039312	0.00264926	0.0305055	0.00587995	0.0130506	0.0816723	0.00728916	0.0210172	0.00512265	0.0230302	0.0131026	0.0133049	0.00243353	0.0325153	0.00820845	0.015696	0.000834412	0.00343425	0.0148231	0.0138228
8656					864.795	719.6	0.0713457	0.0579298	0.0665265	0.0959767	0.0404406	0.047998	0.0408285	0.0999615	0.115093	0.161582	0.057543	0.242866	0.338803	0.114358	0.103474	0.22118	0.0590795	0.181394	0.050717	0.0689297	0.111801	0.0919196	0.122096	0.0360687	0.0710645	0.0754064	0.0367055	0.0607619	0.0555083	0.10843	0.036747	0.058479	0.0739066	0.0608189	0.0260125	0.069228	0.063868	0.0529587	0.126941	0.248018	0.0772983	0.0776119	0.110962
8658					864.712	686.257	0.0110749	0.00173037	0.00875632	0.0163922	0.00251474	0.0025791	0.00110716	0.0600804	0.0115093	0.0367913	0.00351242	0.0175835	0.0119285	0.00637708	0.00847586	0.0427136	0.016817	0.0266229	0.014232	0.00606797	0.0153433	0.00626587	0.0777269	0.000883983	0.00148575	0.00700856	0.00390591	0.00165359	0.00321476	0.00814993	0.00112393	0.00400987	0.00421978	0.00250652	0.00083503	0.00744514	0.003766	0.00438233	0.0113526	0.0303625	0.00558197	0.00929405	0.00654368
6025					717.588	426.499	1.95591	3.82467	3.23043	4.28217	4.41763	4.45196	3.04617	3.6297	5.37064	2.92105	3.43249	2.99574	2.87881	3.76028	3.3049	4.32755	3.64499	2.8672	3.31401	3.16183	3.54091	5.97298	3.04741	3.83823	2.8879	4.71608	4.10385	3.0938	3.42347	4.29906	3.94065	3.47061	6.69393	3.61759	3.96408	3.19751	6.32474	2.8961	3.75909	2.51024	2.38813	3.90727	3.41494
5334					677.549	340.565	0.147045	0.422583	0.285426	0.461778	0.253251	0.333263	0.376991	0.429882	0.450204	0.294382	0.434321	0.251604	0.566771	0.587825	0.389721	0.653686	0.292203	0.346703	0.36535	0.467794	0.390539	0.76999	0.356577	0.369929	0.294182	0.425724	0.368384	0.387902	0.403551	0.520081	0.428685	0.43705	0.667089	0.633468	0.469636	0.351977	0.935896	0.775788	0.391555	0.240489	0.263189	0.474557	0.484216
7982					829.723	726.581	0.552381	0.668236	0.675777	1.00029	0.72447	0.685924	0.834216	0.850633	0.771977	0.619095	0.576968	1.21353	1.32188	1.03084	0.750295	1.1115	0.53329	0.911673	0.627302	0.718451	0.808936	0.813908	0.584853	0.631916	0.910202	0.684954	0.498628	0.703027	1.0498	1.17774	0.653651	1.15461	1.17348	0.817708	0.451818	0.928974	0.806379	0.98109	0.941973	2.23423	0.559721	0.887933	0.847166
7979					829.76	761.221	0.0952214	0.279228	0.0863909	0.26276	0.205173	0.150932	0.0941722	0.362315	0.0377701	0.105967	0.078683	0.034754	0.0574853	0.0424438	0.60098	0.181133	0.148004	0.0624503	0.169817	0.223743	0.163971	0.1864	0.0867586	0.0776205	0.0579641	0.131204	0.0429604	0.144213	0.244279	0.0458204	0.0774786	0.19901	0.26247	0.0580872	0.151563	0.0766692	0.446341	0.110871	0.067514	0.159881	0.0813838	0.135424	0.17946
6283					733.622	475.214	0.46208	0.822993	0.73767	1.84963	0.964058	1.27026	1.04016	0.887369	1.33029	1.0973	0.981608	0.915204	1.19536	1.39944	0.947523	0.967476	1.36313	0.859227	1.01322	0.999905	1.0552	2.08854	0.946746	0.787027	1.27309	1.02884	0.855422	1.20418	0.746648	1.62205	0.984415	0.872827	1.38998	0.855992	0.51839	1.28628	2.61218	1.70212	0.886244	1.06105	0.85206	1.1787	1.19563
3588					546.352	138.26	0.0235468	0.182811	0.0544977	0.156863	0.103448	0.154002	0.111195	0.348955	0.335205	0.27823	0.514233	0.0622657	0.207914	0.386372	0.30648	0.564065	0.284709	0.164089	0.164126	0.73023	0.256662	0.207209	0.0845183	0.159462	0.0819899	0.26122	0.135346	0.168193	0.254811	0.155647	0.138418	0.152602	0.366709	0.225984	0.263275	0.115138	0.941095	0.158211	0.435744	0.0346379	0.122012	0.223111	0.227346
7998					830.568	366.457	2.38923	20.4893	14.7645	17.6843	14.2318	21.0566	18.8775	27.0095	47.3822	33.4336	27.1348	13.6154	13.4252	37.819	15.9531	22.2643	14.3613	14.3957	20.5031	36.7782	21.6784	27.4415	18.5042	30.1621	15.2749	21.3016	19.2893	37.3608	23.3984	28.5699	31.8018	34.1562	40.4881	58.7084	29.2148	18.5931	60.6059	49.0567	20.5119	7.62272	16.3123	29.4187	24.3994
9408					907.77	732.034	2.21168	2.39934	2.71124	3.22467	1.62412	1.97463	1.73565	1.63936	2.48609	4.19684	2.38743	3.32277	3.20536	2.6423	2.11696	2.8031	2.51036	3.79823	2.14824	1.94289	2.55406	3.25563	1.46915	1.4476	2.35484	2.54788	1.57857	2.10896	2.6292	3.35671	1.52991	2.10519	2.49092	2.09269	1.36923	2.37133	2.08766	2.34473	2.09881	4.15469	2.32277	2.28582	2.04877
2963					480.308	96.0148	0.449789	1.20183	0.488318	0.96835	1.01089	0.938165	0.624536	1.44162	1.09726	0.613152	1.44786	0.551973	1.09767	1.10937	1.20076	1.78092	0.799859	0.817126	0.835942	1.73514	1.01053	1.27655	0.810956	0.857015	0.831155	1.06706	0.93309	0.846913	1.15474	0.305864	0.976932	0.755063	1.20647	1.2555	1.02686	0.858338	1.75506	0.712482	1.16321	0.374257	1.02792	0.959772	0.939108
8812					872.77	697.085	4.31348	1.9343	5.23108	8.39407	2.08678	2.55005	2.07177	2.87578	6.28607	23.284	5.56598	12.0705	7.65682	6.15937	4.19026	10.9832	5.49201	13.2221	4.421	3.68512	6.62369	3.51255	1.65589	1.16873	2.48415	3.22809	1.52563	1.96021	3.40421	5.23581	2.10164	2.7805	2.66752	3.92707	1.56859	4.05994	3.19829	4.20094	4.95509	17.2995	4.81419	3.78743	5.28243
7951					828.536	174.957	0.192932	0.801833	0.0941703	0.641295	0.942046	0.386854	0.134192	0.674876	0.332807	0.0508891	0.567975	0.195304	0.434912	0.212515	0.400195	0.574641	0.272947	0.292377	0.0900187	0.489005	0.389089	0.413413	0.382817	0.464806	0.21658	0.831903	0.364319	0.124038	0.925181	0.102957	0.282966	0.27891	0.431041	0.417376	0.433924	0.273715	0.243422	0.050098	0.258626	0.0967341	0.259803	0.342631	0.394656
2729					452.372	119.206	0.00544417	0.021463	0.00991848	0.0147138	0.0129095	0.0515029	0.113322	0.116424	0.845299	0.143551	0.259283	0.0979088	0.0552632	0.222689	0.0464079	0.272852	0.00813222	0.0709976	0.192934	0.173311	0.136716	0.00387313	0.0102387	0.169461	0.003132	0.0612476	0.0148649	0.187563	0.0611716	0.150704	0.25156	0.0576482	0.00571234	1.41241	0.0783244	0.015905	0.620532	1.2233	0.0178261	0.0201977	0.0594215	0.221255	0.171047
7678					814.559	172.597	0.0867922	0.253936	0.0360361	0.684019	0.176869	0.11808	0.0568821	0.554739	0.082594	0.052317	0.230783	0.0525499	0.135485	0.217032	0.246395	0.376424	0.121334	0.111972	0.0725601	0.555391	0.21111	0.325811	0.171843	0.133443	0.126836	0.16664	0.200589	0.105659	0.44071	0.0682568	0.11445	0.0925791	0.210689	0.184694	0.149056	0.426043	0.236348	0.121905	0.183909	0.0780633	0.177463	0.185749	0.159616
2989					482.188	156.328	6.93908e-05	0.00283668	0.000318568	0.00127038	0.00026461	0.00021921	0.00251006	0.00250957	0.000957069	0.00321288	0.00369702	0.0012591	0.00507694	0.00642331	0.00409231	0.00146955	0.00321067	0.000929662	0.00228825	0.00416256	0.00233889	0.000608363	0.000721189	0.000362485	0.0489808	0.0010276	0.00103432	0.00212597	0.00155924	0.000486446	0.000744289	0.00133928	0.00297262	0.00178041	0.00342103	0.00097897	0.00273264	0.00324224	0.00446925	0.000704152	0.00337813	0.00413347	0.00185388
2987					482.323	133.504	0.431639	1.23544	0.971193	1.10177	1.00381	1.40446	1.37332	2.3009	1.58094	1.48755	1.93923	0.764708	1.6344	2.06496	2.16769	2.55245	1.77128	1.11168	1.79271	3.48397	1.6087	1.4013	1.01966	1.24075	1.12315	1.50152	1.08096	1.18374	1.36669	1.20752	1.43523	1.32107	3.35546	1.43663	1.79898	0.897032	3.4863	1.50147	2.44811	0.425531	1.55432	1.53927	1.41149
8430					852.794	727.509	0.961575	0.718072	1.0286	0.0247058	0.706008	0.672596	0.805061	1.02657	1.43562	2.12254	1.05567	4.12294	3.9948	1.75561	1.42703	2.78185	0.965936	2.85411	0.903481	0.890761	1.51268	1.03206	0.613231	0.584713	1.18399	0.964889	0.460322	0.811865	1.1198	1.89643	0.691818	1.25545	0.946311	1.06295	0.48955	1.25035	0.861804	0.928451	1.59954	4.78059	1.06364	1.17989	1.42214
9411					907.762	715.69	0.534881	0.00315455	0.637483	0.907527	0.325339	0.370227	0.330284	0.325641	0.584415	1.00528	0.616616	0.710077	0.655675	0.561943	0.00504524	0.716962	0.453113	0.746904	0.424678	0.00344239	0.495934	0.619257	0.254004	0.243657	0.515876	0.446764	0.309102	0.424708	0.465589	0.833104	0.260046	0.454293	0.484732	0.540191	0.288248	0.593577	0.451067	0.525338	0.410353	1.00571	0.532567	0.482909	0.557992
8356					848.763	693.38	0.350078	0.225658	0.211282	0.546086	0.138535	0.174701	0.219815	0.355079	0.542766	0.668195	0.370153	1.09276	1.4912	0.673424	0.425378	0.704914	0.348015	1.1287	0.274378	0.268941	0.510503	0.318152	0.2398	0.111442	0.305569	0.311187	0.129996	0.226282	0.299671	0.444368	0.164481	0.28251	0.333654	0.283773	0.150962	0.340463	0.287538	0.269058	0.604859	1.75304	0.317922	0.358736	0.438152
7994					830.493	318.627	0.0238387	0.00085405	0.00485439	0.00120723	0.000861176	0.0041567	0.00313889	0.00446589	0.019164	0.00616299	0.00296992	0.00291259	0.000541102	0.00325665	0.00355043	0.0729093	0.00262188	0.00133583	0.00421223	0.0815378	0.0122276	0.0150303	0.00326143	0.0198184	0.00143607	0.00200593	0.00231495	0.00665577	0.00576023	0.000922055	0.0153308	0.00330575	0.00418129	0.0106497	0.00396882	0.00299719	0.0162053	0.018809	0.00175433	0.000978766	0.0038187	0.00696024	0.00458656
8576					860.614	433.327	0.237908	0.473509	0.954964	0.784587	0.560878	0.578703	0.851564	0.827629	0.978318	0.706523	0.537791	0.808972	0.830196	1.10899	0.881511	0.909953	0.648171	0.722123	0.874566	0.896251	0.758655	0.853178	0.601142	1.05101	0.496433	0.954749	0.719109	0.923548	0.854055	1.16258	0.978368	1.16883	2.031	1.38661	1.28598	0.700329	1.17145	1.0268	0.902594	0.666856	0.971789	0.995321	0.825166
5093					662.571	495.343	1.61443	4.26116	4.92852	4.85039	5.57223	5.35324	3.70064	6.31699	5.31538	5.7371	5.26823	6.5495	5.18678	5.6257	6.5683	5.40527	4.45886	4.96696	4.75912	5.85763	5.11482	7.0311	4.57659	3.73518	4.69368	5.40955	3.79255	3.20755	6.3802	3.3152	5.46369	3.69073	6.35157	2.50145	3.84344	3.46625	2.29755	3.03852	3.99203	3.96967	5.13024	4.29434	4.57432
6287					733.612	454.39	1.39419	2.26991	1.64418	3.17937	2.1973	2.95762	2.27986	1.959	3.93318	3.04742	1.99998	1.98868	1.48106	3.10576	1.82028	1.89848	2.46891	1.82096	2.36365	2.09598	2.29529	4.27608	2.21547	2.07274	2.36232	2.24561	2.6946	2.40189	2.66559	2.86264	1.83414	2.52575	4.1399	2.08482	1.79133	2.56757	4.82087	3.35803	2.67554	2.3028	1.68999	2.67938	2.51381
7226					790.529	365.732	0.0863972	0.688421	0.634388	0.390044	0.381721	0.740195	0.782867	1.13422	0.114641	1.35876	1.01613	0.418241	0.543939	1.36267	0.722157	0.750153	0.46607	0.0175026	0.766501	1.10139	0.67382	0.548347	0.805899	1.26426	0.472063	0.0201452	0.467229	0.769922	1.05449	0.54267	1.20778	0.906037	1.12526	1.56256	1.31619	0.668028	1.67004	1.26683	0.0995162	0.179676	0.5091	0.822802	0.801953
2473					426.357	132.962	0.0159249	0.049599	0.0391773	0.0402675	0.0278605	0.0671572	0.0745666	0.133518	0.17199	0.163091	0.0471178	0.0457022	0.00115582	0.130326	0.0576793	0.0451364	0.0553628	0.0244614	0.231242	0.0428076	0.0732072	0.0700706	0.036143	0.338809	0.037331	0.0328783	0.0108022	0.221078	0.0834469	0.161476	0.295025	0.086111	0.0408387	0.770805	0.0232196	0.0358691	0.331398	0.375194	0.0564589	0.0845545	0.0952413	0.159338	0.16042
8170					838.558	215.886	0.0511328	0.233604	0.0195167	0.180438	0.109981	0.0885406	0.0535093	0.195766	0.0739137	0.0176659	0.164242	0.0402388	0.102744	0.0822936	0.112136	0.194551	0.0916884	0.0705051	0.0277464	0.13057	0.102039	0.116766	0.126824	0.109221	0.0644637	0.0969505	0.109895	0.0471005	0.150926	0.0343265	0.05916	0.0543655	0.241246	0.0827285	0.143434	0.0889215	0.103097	0.0267091	0.105157	0.0285847	0.0865964	0.0938237	0.0948824
8950					880.582	373.952	0.00234565	0.152303	0.0910569	0.0360433	0.0805797	0.0754262	0.226249	0.20599	0.307372	0.218947	0.301535	0.00804141	0.205247	0.339284	0.246508	0.0917761	0.178441	0.196573	0.100585	0.202862	0.163358	0.163867	0.128758	0.18033	0.0729144	0.0916715	0.113379	0.218449	0.162736	0.144753	0.42167	0.0962629	0.287404	0.422263	0.514245	0.161253	0.388331	0.483087	0.0227098	0.0363334	0.102501	0.210646	0.1823
8956					880.575	337.803	0.00109637	0.0510737	0.0300177	0.00842537	0.0225866	0.0230799	0.0455032	0.0695049	0.121041	0.0989318	0.106247	0.0419735	0.0398896	0.111065	0.0533664	0.0343256	0.0365246	0.0285977	0.0278552	0.059748	0.0505427	0.0747762	0.0464391	0.138608	0.0264506	0.0326093	0.0399263	0.0698551	0.0557791	0.0407721	0.114089	0.0595123	0.0554983	0.27795	0.139735	0.0692067	0.21491	0.213386	0.0976632	0.0109927	0.0567137	0.0917437	0.0659212
8541					858.583	239.985	0.0719059	0.317527	0.0339882	0.241598	0.232421	0.0860426	0.0326668	0.270586	0.111444	0.0273316	0.233051	0.0720799	0.300555	0.126851	0.122983	0.153328	0.163639	0.127397	0.0375876	0.141871	0.145243	0.161701	0.142145	0.151044	0.0980731	0.309906	0.130953	0.0289889	0.25124	0.0538942	0.107612	0.0681275	0.277405	0.151505	0.151469	0.152359	0.109432	0.0236427	0.130464	0.0751795	0.115606	0.134537	0.171573
7993					830.551	163.304	0.147729	0.608511	0.113104	0.462946	0.415949	0.261404	0.0399691	0.510133	0.285166	0.0632343	0.42869	0.184627	0.25357	0.234501	0.428824	0.408765	0.27709	0.358202	0.0577499	0.459937	0.300005	0.408172	0.462447	0.269069	0.295236	0.448275	0.333252	0.130382	0.543613	0.107891	0.361986	0.229548	0.429595	0.287383	0.253821	0.233899	0.194915	0.0648166	0.249078	0.147851	0.272978	0.28621	0.157666
7087					782.569	389.462	42.2254	92.7781	65.8705	113.777	79.624	91.2677	91.4614	82.9197	88.0021	129.04	87.1437	46.8369	62.7364	133.076	83.2322	140.822	67.0831	52.2539	101.052	114.179	88.269	171.67	91.6552	86.234	69.9391	77.5366	111.739	114.863	99.7592	99.5068	79.8047	96.3828	139.709	92.0034	87.4439	98.6631	170.611	179.465	106.428	52.6929	107.827	106.697	90.6515
6234					730.471	328.703	0.00111887	0.0172371	0.000728213	0.0146389	0.0168457	0.00328538	0.00344268	0.0162676	0.00263954	0.00393691	0.0181145	0.00236814	0.00855623	0.00526058	0.0135961	0.0106557	0.0033752	0.00888755	0.000263752	0.0053184	0.00782685	0.0209089	0.00972315	0.00589664	0.00301524	0.0159077	0.00433897	0.00144876	0.0216326	0.00543104	0.00279298	0.00751271	0.0028627	0.000942632	0.00560734	0.00238878	0.0126059	0.00629372	0.0085492	0.00138927	0.00593892	0.00725936	0.0082139
8033					832.585	392.04	6.16707	30.4608	18.2112	17.2378	18.6795	14.4691	27.6622	30.1669	35.4122	25.4557	28.9629	18.6482	31.9637	48.6736	20.7147	17.97	20.4335	22.5897	23.065	31.3114	24.4128	19.7776	20.1139	24.2815	24.9847	25.5034	17.431	38.195	24.8771	27.1219	23.9586	30.7239	64.7479	43.3367	46.6953	21.4302	38.4821	30.4018	24.7065	12.8373	23.3714	29.1489	28.2041
8130					836.605	428.007	0.2254	0.708199	0.731284	0.756826	0.949371	0.846585	1.23112	1.41904	1.06221	0.861814	0.90975	0.0208386	0.656239	2.0235	0.729956	0.709562	0.639202	0.651811	0.755026	0.886501	0.838712	0.809755	0.63162	0.839304	0.527593	0.972193	0.922077	1.71496	0.790298	0.814108	0.82964	0.899284	2.99738	1.24719	1.4131	0.560693	1.77197	0.814218	0.790107	0.187249	0.697276	1.0115	0.714984
8041					832.574	420.032	0.449263	0.594062	0.619666	0.369404	0.477702	0.518353	0.618546	0.813955	0.780414	0.576827	0.865237	0.687566	0.7505	0.621756	0.785789	0.630594	0.52804	0.537945	0.562167	0.558076	0.617293	0.609328	0.573911	0.809603	0.478945	0.63655	0.521769	0.603429	0.513388	0.619151	0.729506	0.618173	1.12983	0.905537	0.765707	0.620471	0.714019	0.593158	0.804976	0.461958	0.613893	0.666165	0.676939
8038					832.584	406.094	1.54801	8.71454	7.6123	4.00341	5.07719	6.36335	8.68445	11.2236	15.2047	10.4737	13.3222	8.66964	9.18289	12.7037	11.3408	9.69627	7.71598	6.4964	8.89076	10.2867	8.86053	11.236	7.32165	11.9634	6.30312	8.26362	6.92437	10.6107	8.5844	7.99373	14.6219	9.58017	12.8184	20.1567	15.2327	9.17531	16.9219	13.7808	14.5859	4.15383	9.85111	11.004	10.3394
6596					754.501	329.81	0.0143246	0.0626846	0.0126075	0.0522058	0.0545317	0.0528347	0.0169167	0.0736644	0.0319903	0.00384897	0.0480437	0.016585	0.0488666	0.0273102	0.0546722	0.0568768	0.0229952	0.0259913	0.0132627	0.0683211	0.0379267	0.0401786	0.0511884	0.0326241	0.0270349	0.049952	0.0388446	0.0122001	0.0768161	0.0112906	0.0286628	0.0243866	0.0496714	0.0429226	0.0390932	0.0290238	0.0262099	0.00653313	0.030162	0.0132321	0.0347225	0.0332375	0.0357429
8612					862.632	474.735	0.119963	0.381893	0.156587	0.456643	0.291683	0.404766	0.352152	0.44445	0.705422	0.390557	0.516566	0.349886	0.320565	0.701975	0.403597	0.38459	0.328554	0.280748	0.470258	0.513448	0.398715	0.479223	0.263693	0.474392	0.223759	0.58456	0.400165	0.408986	0.402516	0.399842	0.493883	0.461311	0.735051	0.715248	0.455459	0.320234	0.588167	0.530749	0.169735	0.289697	0.433826	0.441525	0.371574
8616					862.633	459.6	0.318253	0.424783	0.458029	0.388848	0.503364	0.38846	0.445402	0.485116	0.325015	0.645669	0.493169	0.226648	0.31318	0.502867	0.44386	0.323716	0.490297	0.391695	0.599348	0.466039	0.431688	0.52928	0.249514	0.115859	0.293302	0.446268	0.282768	0.450781	0.460791	0.394267	0.463495	0.417422	1.06806	0.542861	0.512669	0.363432	0.634422	0.535635	0.503268	0.288933	0.354366	0.44537	0.440738
6006					716.623	692.098	0.0533279	0.0568664	0.0757702	0.0724456	0.0328113	0.0231536	0.0310454	0.0779364	0.0707666	0.0599505	0.0319884	0.141653	0.164207	0.0625666	0.0991097	0.101569	0.0697759	0.0937162	0.0357636	0.0287019	0.0691562	0.0606708	0.0288599	0.034454	0.0306359	0.0543663	0.0395029	0.0454191	0.0529376	0.197477	0.0367182	0.378941	0.0880467	0.0414064	0.0554884	0.144434	0.112173	0.0710381	0.0847553	0.492969	0.0582154	0.105425	0.0853966
8906					878.557	352.192	0.0182903	0.449817	0.530316	0.148175	0.266598	0.307069	0.415599	0.537669	0.750392	0.635039	0.566208	0.353907	0.297982	0.590081	0.40646	0.266464	0.3328	0.3183	0.357215	0.486186	0.401728	0.451448	0.41072	0.640529	0.34181	0.362649	0.402564	0.558925	0.724384	0.368385	0.640052	0.570968	0.703288	0.946862	0.666396	0.449041	0.652031	0.729221	0.465114	0.137963	0.42873	0.532554	0.453319
8917					878.567	337.916	0.0158698	0.289833	0.162162	0.069763	0.144345	0.137426	0.2874	0.380833	0.676242	0.435681	0.576404	0.228322	0.217538	0.571711	0.301793	0.208428	0.2138	0.173588	0.170638	0.355746	0.280876	0.456377	0.25996	0.765683	0.185493	0.211303	0.242454	0.400429	0.323927	0.257392	0.67194	0.337426	0.366687	1.55212	0.795466	0.409375	0.976447	0.988711	0.480209	0.066298	0.333433	0.504057	0.380148
8577					860.605	407.431	0.0259922	0.158828	0.146738	0.134461	0.121123	0.137402	0.212918	0.254392	0.274329	0.191922	0.239413	0.14073	0.257469	0.2608	0.218858	0.14391	0.146383	0.188912	0.167148	0.222923	0.182232	0.12593	0.119916	0.157987	0.104126	0.206925	0.127787	0.270126	0.175783	0.207751	0.236789	0.189689	0.440967	0.320964	0.434715	0.131795	0.309412	0.274036	0.183358	0.120713	0.101848	0.212031	0.182319
8086					834.588	467.428	1.20698	1.27837	1.07779	1.30839	1.40424	1.48136	1.43809	1.43121	1.77587	1.54691	1.23368	1.55029	1.45378	1.62009	1.04526	1.34359	1.50395	1.55876	1.27063	1.1432	1.38362	1.38699	1.29874	1.36164	1.25953	1.48759	1.50015	1.35682	1.33376	1.51241	1.1494	1.08001	2.96319	1.25638	1.61488	1.48672	1.51549	1.47916	1.58396	1.5202	1.38323	1.47651	0.984655
7154					786.601	477.884	63.6755	128.02	96.0066	150.93	120.12	134.29	124.999	106.91	130.673	161.167	166.651	86.421	101.487	191.14	112.652	150.194	115.418	106.443	129.655	137.688	125.727	220.848	93.0519	132.131	98.8173	131.952	138.574	124.681	167.412	148.439	131.537	125.092	194.518	138.952	111.815	136.588	214.669	206.582	159.821	93.7367	124.823	144.702	133.696
7529					806.57	401.228	7.69691	29.0751	28.5877	19.5305	23.4483	31.6641	32.3524	39.397	57.0548	49.7892	42.8745	50.3382	38.8088	52.5367	40.433	43.4428	41.0243	32.5477	35.4597	42.3442	36.9203	47.9446	31.5065	49.7123	26.1943	32.9173	29.1459	38.9743	43.7361	36.9651	55.1051	42.3863	60.5449	75.5067	43.6788	43.1673	59.7852	64.1629	52.073	28.2609	43.5415	45.2654	41.541
7558					808.583	418.593	40.8745	144.519	101.102	91.1773	115.87	107.061	108.724	119.545	155.601	95.8675	101.145	95.8468	101.284	114.234	99.8233	100.577	85.0913	82.7039	101.706	114.57	103.866	94.8694	91.3644	108.777	120.357	113.833	87.9408	115.511	94.7399	114.714	112.94	128.744	295.84	153.981	113.074	83.8012	130.742	92.1265	96.5806	63.717	95.5374	115.46	99.631
8496					856.584	387.229	0.937598	4.5477	3.81114	3.69792	3.30369	3.53603	9.85563	9.62057	12.4179	9.2122	6.63165	4.30289	7.29075	6.57976	9.23718	2.55809	5.88191	9.96862	3.81433	10.6695	6.39375	3.12589	6.15702	3.52646	5.12038	3.5437	5.37143	10.7212	4.07489	5.71549	8.7286	3.76555	11.9619	15.9074	9.78523	3.64746	6.44721	6.28883	3.98269	3.05022	2.65646	6.1789	4.79547
7608					810.599	444.284	5.46556	45.69	15.5203	26.5308	31.4926	16.9692	39.3961	38.3239	42.5161	38.4845	25.5074	16.4468	48.9602	65.5984	28.0876	37.7139	37.7096	22.0213	25.3892	41.6434	32.4733	56.037	31.1262	34.426	30.7486	46.9613	33.9462	56.7084	43.3025	43.7316	26.2148	45.5061	76.675	52.5555	51.9	42.4981	60.6899	54.4025	49.5885	15.4216	35.3086	44.3874	28.4104
7084					782.569	412.808	208.314	479.234	461.682	492.265	498.677	592.396	517.39	537.925	659.602	570.793	495.555	463.588	459.755	563.954	466.989	519.239	480.641	477.454	487.106	592.113	501.234	736.922	449.701	547.697	457.752	511.691	454.514	511.805	603.537	547.187	564.743	580.958	952	639.133	478.01	452.516	590.523	538.621	478.264	361.918	457.662	545.758	490.632
7036					780.554	379.229	0.947486	9.75894	2.7554	4.01855	4.59387	4.3829	4.51666	6.52113	16.6701	5.69741	5.6578	15.0766	4.90415	10.2402	6.18729	11.0111	4.25998	4.96707	5.25258	6.35217	6.68857	13.0196	3.95867	9.39929	3.98502	7.11261	6.55592	6.23146	6.01154	4.27214	2.45894	10.8452	8.01302	3.34989	5.1228	5.21697	7.92317	7.05847	9.46872	2.46821	6.90068	6.46861	6.1907
7563					808.583	403.781	5.3991	36.1707	18.3827	27.1519	22.23	17.4878	38.2385	30.119	33.1599	37.7453	28.0138	19.5627	40.4892	67.6629	30.7194	34.5136	25.9406	21.3823	29.8244	37.5619	30.0878	50.5771	29.5056	31.8219	30.6778	29.1458	28.4256	54.9286	40.1822	32.5819	29.4765	37.5434	75.5471	38.8566	53.6085	34.3252	62.132	62.8859	47.8848	15.0859	40.33	41.2761	37.0812
8080					834.59	406.095	0.244967	1.39767	1.18382	0.681995	0.815143	1.06264	1.3421	1.81876	2.54181	1.65814	2.00452	1.33112	1.44562	2.02616	2.33017	1.61664	1.19822	1.08722	1.37469	1.68788	1.44246	2.46649	1.2173	1.70908	1.02919	1.33186	1.08208	1.71202	1.36918	1.29113	2.21268	1.53513	5.73409	3.16626	2.33245	1.32189	2.81877	2.20047	2.27796	0.690843	1.50826	1.95036	2.36138
8077					834.589	392.04	1.05602	4.82657	2.41576	2.72797	2.87478	2.34339	4.02144	4.64565	5.61771	4.00752	4.45586	2.64396	5.08303	6.22977	4.4239	2.82742	3.21497	3.58013	3.18321	4.87164	3.75254	4.60484	3.18398	3.40784	3.9378	3.86295	2.74106	6.0106	3.6537	4.1838	3.44178	4.69256	10.171	6.58099	7.15997	3.19021	5.11077	4.66953	3.89565	2.08187	3.39249	4.49867	4.96087
3817					566.347	130.575	0.0534875	0.167814	0.0790239	0.116296	0.163194	0.132452	0.100511	0.153146	0.104219	0.0567826	0.146851	0.0547867	0.0927602	0.130242	0.131184	0.120416	0.104918	0.0757829	0.0688092	0.124494	0.108858	0.171042	0.167825	0.205725	0.117701	0.170494	0.173747	0.113055	0.211608	0.0879803	0.246227	0.129009	0.27333	0.21569	0.28086	0.122109	0.205096	0.0773192	0.224107	0.0463306	0.139987	0.168962	0.137836
8500					856.573	351.248	0.139568	2.58729	1.49238	0.727551	1.31391	1.52914	2.16627	3.02929	6.2262	3.71712	3.55281	1.51216	1.46894	4.16671	1.85689	1.67228	1.64436	1.63583	1.66479	3.67007	2.28868	2.63519	2.10981	4.68705	1.51403	2.05667	2.03435	3.74152	2.47819	2.25844	4.06127	3.58538	3.50531	8.19224	3.89474	2.32615	5.85814	5.28411	2.58856	0.631237	1.87026	3.26563	2.5525
7294					794.568	393.087	0.233983	0.958969	0.703631	0.695777	0.884263	1.09681	1.055	1.07095	1.69309	0.799779	0.838536	0.857174	1.01284	1.00247	0.864341	1.2234	0.663654	0.60273	0.828211	0.883747	0.898467	1.38064	0.755873	1.25643	0.689249	1.12466	0.723541	0.965564	0.804979	1.01696	0.957101	1.19786	2.02645	1.30977	0.872342	0.681582	1.30515	0.711062	1.07997	0.496302	0.940495	1.0148	0.878925
7250					792.527	354.087	0.00599117	0.0320018	0.00519793	0.0110048	0.0143329	0.0369033	0.0380039	0.0494746	0.01787	0.0302552	0.0520036	0.0116286	0.0174416	0.0592099	0.0252321	0.055587	0.0151303	0.01848	0.0176698	0.0189947	0.0266207	0.0690916	0.0547988	0.0197635	0.00998914	0.0202563	0.0245975	0.0324347	0.0348908	0.0216951	0.0231312	0.0327768	0.0372214	0.0354528	0.0442344	0.0331355	0.0275804	0.0618259	0.0323126	0.0363086	0.00741734	0.0329457	0.0406871
7037					780.553	367.852	1.26908	10.8125	4.45444	9.88756	4.66716	7.03071	9.82135	9.09697	15.299	5.95355	8.08111	4.54027	8.37592	14.1681	7.33126	9.27631	6.41557	6.33396	7.29337	11.8313	8.09698	11.1687	5.38609	9.35776	6.70983	8.83506	5.17912	12.0082	11.3115	9.4213	12.5977	12.4112	14.8471	18.0261	7.54071	7.1489	14.7412	11.9566	7.62595	3.78272	6.79009	9.84229	9.52268
7562					808.584	435.411	5.36977	14.1133	14.5415	14.1418	13.4182	16.0218	18.1142	20.4486	21.6077	16.0908	18.7748	14.4925	18.9262	17.9548	19.0215	20.0764	16.2925	15.7698	16.9694	18.0967	16.5121	20.0407	13.558	20.1397	11.0561	16.1607	15.3004	15.1848	15.9082	19.6722	20.1004	17.115	33.3549	20.2876	15.9234	14.4389	23.9674	17.0168	16.1325	11.0091	13.4244	17.4895	17.4443
2476					426.357	110.332	0.114857	0.323719	0.322118	0.241026	0.206706	0.518697	0.560073	1.0096	5.92316	1.25292	1.8915	1.31217	0.864096	1.13387	0.450315	1.84298	0.309938	0.98219	1.6312	1.83136	1.13612	0.426904	0.20302	2.22834	0.245617	0.868214	0.208563	1.60357	0.529356	1.00589	1.92678	0.503393	0.280154	6.36057	0.680352	0.270882	2.48933	3.19715	0.423306	0.496642	0.821002	1.23845	1.0907
2438					424.342	87.329	0.0580976	0.232484	0.185334	0.17686	0.12394	0.377725	0.466692	0.763758	4.44054	1.27748	1.62486	0.585959	0.555079	1.73597	0.257213	1.4526	0.174091	0.889094	1.41449	1.64114	0.92167	0.210151	0.0920031	1.96694	0.147905	0.353101	0.147211	0.866057	0.344055	0.755174	0.901242	0.282248	0.219317	3.08438	0.539373	0.181733	2.87967	4.66734	0.348722	0.442226	0.725913	0.957738	0.864081
5192					668.634	733.097	0.594282	0.326969	0.499376	1.06846	0.255376	0.258319	0.245357	0.62408	0.614357	0.650764	0.524512	0.925769	2.31257	0.646435	0.721011	0.846572	0.836917	1.14464	0.422316	0.304964	0.691152	0.407352	0.217591	0.266867	0.306331	0.593595	0.282928	0.269683	0.300332	0.97266	0.296241	1.26257	0.465083	0.288903	0.290135	0.696899	0.792883	0.391935	0.605589	2.64096	0.466339	0.590743	0.757906
7650					812.606	465.312	9.59952	18.6961	16.5815	24.3841	19.1069	24.1882	21.2891	23.4147	31.2541	24.3744	23.0845	18.7261	17.4019	25.4757	16.8277	22.1582	20.9401	22.5621	17.5386	20.0586	20.8831	28.0516	16.8054	24.2095	15.8476	22.673	23.3364	21.3542	23.5335	26.987	20.8898	27.0656	43.0699	25.6405	21.9377	19.3692	32.0859	23.7946	21.0626	16.1037	15.8074	23.4813	19.8479
7651					812.605	444.266	1.11838	4.85293	3.77721	4.85817	4.29489	3.51126	5.42364	5.17121	5.91661	5.32004	3.47438	3.65541	6.75178	8.999	5.32481	5.18545	5.09035	3.03537	4.96959	5.68497	4.82077	7.63304	4.33179	4.70639	4.22171	6.421	4.49953	7.80094	4.51333	6.00854	3.54844	6.08993	10.2345	7.06175	7.22042	4.68251	8.26092	7.45947	6.83818	2.1097	4.87544	5.92588	3.9213
8172					838.684	522.731	0.00414459	0.246379	0.98897	0.256276	0.161284	0.180543	0.225799	0.240229	0.0989154	0.246417	0.297735	0.0534065	0.191632	0.423144	0.236667	0.25446	0.225607	0.101372	0.24629	0.332872	0.250607	0.486486	0.149117	0.111637	0.206048	1.13853	0.179913	0.248318	0.27851	0.0217523	0.227381	0.114515	0.470298	0.161661	0.301026	0.118303	0.632247	0.464736	0.31697	0.0147461	0.182316	0.291226	0.137261
4660					634.539	474.686	0.35164	1.16945	0.780038	1.53515	0.778546	1.19637	1.45426	1.14119	1.58687	1.9301	1.46164	0.851101	0.888608	2.14713	1.47092	2.24439	0.792934	0.897962	1.44936	1.99243	1.306	2.34985	0.861987	0.890484	0.846293	1.05515	1.24202	1.25228	1.50232	1.15282	1.05874	1.03997	1.54923	0.959877	1.18116	1.31659	1.86753	2.36259	1.30426	0.722481	1.09498	1.28053	1.17537
9315					901.725	691.554	1.11672	1.32374	1.63466	2.7074	0.989636	1.29677	2.09343	0.858254	1.81904	2.18661	1.53417	1.35247	1.32964	1.2228	0.745646	2.15239	0.732224	1.48861	0.990797	0.937316	1.42562	1.70988	0.989714	1.05164	1.30407	1.00249	0.85312	1.57647	1.50342	1.41529	0.919477	1.76606	1.98203	2.82917	0.923937	1.60909	2.56645	2.06596	0.722466	1.61562	0.830319	1.46183	1.51631
7522					806.57	378.749	30.7285	110.583	111.02	122.31	91.9088	143.014	156.162	151.957	198.595	178.64	131.406	75.6988	97.9799	199.862	113.37	149.696	89.9121	75.2749	135.603	184.952	127.434	170.399	129.427	181.415	89.0995	107.274	114.711	167.288	140.679	162.234	137.888	169.378	294.566	181.26	158.569	104.722	258.295	210.479	118.875	53.3135	107.125	152.85	133.504
7039					780.553	351.328	0.45246	1.80469	0.865578	1.76897	1.07474	1.20852	1.2518	1.45114	1.83442	2.01304	1.47535	0.444104	0.720829	2.28754	1.63413	2.36169	0.717104	0.890102	1.17254	1.80699	1.36179	2.35621	1.41771	1.16814	0.766761	1.04451	1.03118	1.9372	2.11767	1.94276	1.16956	1.42942	1.90015	1.80915	1.58542	1.42137	3.4122	3.44875	1.51584	0.486208	1.26253	1.66114	1.57703
5605					692.625	702.897	0.126501	0.0636464	0.171226	0.271307	0.0742056	0.0669843	0.0684649	0.149949	0.148004	0.166485	0.10364	0.227192	0.237322	0.102928	0.187029	0.290725	0.143492	0.351348	0.132944	0.0800195	0.158171	0.0866295	0.0500195	0.0465775	0.0554438	0.153573	0.0614823	0.079086	0.0660392	0.302942	0.0722521	0.294164	0.175921	0.081862	0.0910955	0.181032	0.183128	0.0974259	0.132239	0.759663	0.0809072	0.152574	0.16104
8455					854.551	184.055	0.0858294	0.182679	0.0239172	0.138006	0.217842	0.07285	0.0356351	0.169985	0.176251	0.00937361	0.150536	0.0457414	0.109091	0.0583466	0.109952	0.120513	0.0669929	0.0587684	0.0199941	0.10022	0.0976262	0.0884649	0.0921734	0.0849684	0.0431168	0.323401	0.0759479	0.0310442	0.190421	0.0267662	0.13333	0.0511426	0.125407	0.0831822	0.121872	0.0579623	0.0612125	0.0125287	0.0733449	0.0242886	0.0667636	0.0883669	0.0687013
8456					854.551	173.183	0.033218	0.158694	0.0171757	0.129234	0.0918101	0.0799231	0.0351806	0.179267	0.0776116	0.0199897	0.131926	0.0368149	0.118977	0.0968315	0.139876	0.153732	0.0784349	0.0771915	0.0259382	0.167647	0.0924736	0.0901732	0.0939898	0.0685423	0.0602785	0.128067	0.082436	0.0337145	0.140385	0.0242337	0.0592038	0.0434051	0.139607	0.0898501	0.115479	0.0624801	0.0876788	0.0195136	0.0849323	0.037939	0.0753308	0.076862	0.0805769
2470					426.218	85.2434	0.0207621	0.0234075	0.00796027	0.032081	0.0829123	0.0550013	0.0121395	0.0178274	0.0372398	0.0231513	0.0153743	0.0226527	0.0098846	0.0183772	0.162384	0.0091785	0.0259192	0.0319628	0.00956261	0.0224879	0.0320133	0.0162127	0.0136056	0.0155319	0.00786619	0.037071	0.00811982	0.00725465	0.0122085	0.0245578	0.010125	0.0243695	0.025649	0.0376938	0.0149937	0.0790596	0.102561	0.172536	0.107733	0.044882	0.0154566	0.0388744	0.028134
6817					768.492	371.775	0.00149996	0.0334347	0.0152275	0.0480247	0.0149194	0.0276595	0.0339351	0.02551	0.0248741	0.0216422	0.0205077	0.00675811	0.0161792	0.0306923	0.0263489	0.0322857	0.0132177	0.00661293	0.00677773	0.0162053	0.0211156	0.0817468	0.0105609	0.0223665	0.036154	0.0343901	0.0227428	0.0228051	0.0361351	0.0414992	0.0398396	0.0412651	0.0556964	0.0380663	0.0130643	0.0331877	0.0741952	0.0640946	0.0252035	0.0120985	0.0176023	0.0361357	0.0276227
5574					690.609	682.994	0.0011691	0.00234605	0.000993465	0.00109983	0.00030063	3.71741e-05	3.6957e-05	0.00188077	0.00359751	3.83816e-05	3.78662e-05	0.0256238	0.000567898	0.00240619	0.00114122	0.00732705	3.76125e-05	0.00662786	3.71335e-05	0.00618286	0.00307447	0.0027482	0.000817594	3.55792e-05	0.000586788	0.00420145	0.000609741	0.00129756	0.00159931	0.0078578	3.71217e-05	0.0197676	0.0049061	0.0019281	0.00200522	0.00533234	4.2441e-05	0.00138237	0.00506496	0.0244377	0.00423791	0.0044448	0.00336966
8992					882.594	355.622	0.00693812	0.0393787	0.0294752	0.0492377	0.0257769	0.035175	0.04514	0.0306664	0.0607056	0.0638108	0.053452	0.0189598	0.0227621	0.0841941	0.0330695	0.0509675	0.0225449	0.0220617	0.0408954	0.0572946	0.0396253	0.0582111	0.025608	0.0529746	0.0196916	0.0354153	0.0312177	0.0613062	0.0432099	0.062761	0.0485008	0.0534477	0.0558141	0.0851671	0.0557983	0.0365429	0.109393	0.152421	0.0516602	0.0188693	0.0292527	0.0543631	0.0425132
8165					838.558	279.162	0.0468761	0.205261	0.121692	0.188769	0.144005	0.117601	0.145111	0.173537	0.170398	0.0981414	0.168064	0.0878366	0.112282	0.12714	0.147472	0.201861	0.12536	0.116551	0.100893	0.259588	0.142922	0.350752	0.115977	0.14579	0.0837093	0.154664	0.106057	0.119537	0.191111	0.102935	0.126074	0.110747	0.384556	0.129141	0.185724	0.186659	0.152826	0.116296	0.14375	0.0633089	0.110866	0.154024	0.141751
8534					858.598	407.481	0.247504	1.34221	1.02822	0.988351	0.922517	1.13287	1.70867	3.61555	1.76485	1.41888	1.48718	1.94257	1.92165	1.98593	1.65142	1.0074	1.22437	1.42021	1.22007	1.6376	1.4834	1.23421	0.982373	1.22664	0.878726	2.66626	1.1738	2.46862	1.34978	1.53316	1.65884	1.39902	3.14632	2.28409	3.12794	1.0773	2.0541	2.58894	2.25518	0.893953	0.864819	1.7432	1.3385
5352					678.478	327.233	0.00141225	0.0121334	0.000450697	0.0118666	0.00391422	0.00598527	0.000541274	0.0116135	0.00334451	0.000466823	0.0156455	0.00177772	0.00833145	0.00487009	0.00919901	0.0104868	0.00238305	0.00113103	0.00113475	0.00899284	0.00578403	0.00818665	0.00789548	0.00275388	0.00269747	0.00640761	0.00563143	0.000804487	0.0101365	0.000186673	0.00165345	0.000983478	0.00999935	0.00127293	0.00682013	0.00351003	0.0027166	0.000619945	0.00545317	0.000719299	0.00254196	0.00404952	0.00479598
10290					985.807	728.836	0.0562064	0.0588249	0.0549783	0.0177543	0.0220067	0.0156845	0.0320324	0.0196062	0.0308026	0.0738341	0.0527583	0.0066664	0.0204279	0.0460972	0.0178144	0.000734204	0.0227753	0.0117285	0.0143433	0.035663	0.0305369	0.041819	0.0203868	0.0376438	0.0493887	0.0269273	0.0204188	0.0624518	0.042615	0.0597627	0.0220083	0.0289556	0.112594	0.0715424	0.0706506	0.0480019	0.0541008	0.0633906	0.0208639	0.00276974	0.0133519	0.0434822	0.0227099
10292					985.896	716.468	0.106373	0.077119	0.121994	0.171923	0.0643815	0.0726655	0.0720556	0.071042	0.102602	0.18424	0.0947104	0.170296	0.118334	0.100946	0.0839692	0.141779	0.0880982	0.164788	0.0776716	0.0815785	0.108328	0.131218	0.051281	0.0468455	0.102554	0.0871985	0.0715154	0.0829176	0.0916759	0.21243	0.055094	0.081369	0.109067	0.101453	0.0685699	0.106707	0.0953438	0.140887	0.0731617	0.201852	0.129227	0.102018	0.123315
8677					865.723	703.922	0.0940033	0.0703764	0.0743335	0.121481	0.0579355	0.0719539	0.0497975	0.0997641	0.137857	0.216754	0.0940425	0.242314	0.299059	0.155659	0.117116	0.302364	0.131215	0.240248	0.107016	0.0863921	0.138484	0.117173	0.0823185	0.036284	0.079087	0.112623	0.0627967	0.0627503	0.0656913	0.109706	0.0535082	0.075257	0.0949246	0.0632733	0.046103	0.0986231	0.084378	0.0721906	0.173123	0.309687	0.116417	0.0957957	0.115024
10180					973.723	667.679	0.0471137	0.479139	0.227124	0.0913923	0.148711	0.0577142	0.249516	0.292162	0.840222	0.150867	0.378502	0.432626	0.119901	0.387359	0.143581	0.210788	0.0639649	0.204593	0.188003	0.0633745	0.238833	0.414961	0.0940548	0.237878	0.234957	0.188807	0.236422	0.0616008	0.313904	0.507015	0.238128	0.40376	0.181856	0.211353	0.46085	0.136778	0.227735	0.0831717	0.125288	0.0624307	0.075087	0.224802	0.33994
7983					829.715	626.866	0.355319	1.44926	0.745149	0.936954	1.69773	1.31466	1.27254	1.49336	1.15332	1.18621	1.88211	0.979023	1.79756	1.50935	1.18196	1.93446	1.06828	0.563253	1.18768	2.03543	1.28718	2.39351	1.21486	1.11247	1.21221	0.833367	1.53465	1.37045	1.97233	0.709751	1.685	1.32401	2.2582	1.25367	1.24997	0.943134	2.22984	1.69425	1.74969	0.583732	0.74989	1.40375	1.10274
8675					865.704	595.492	0.0179439	0.0811051	0.0516344	0.0976625	0.0362552	0.0629159	0.0684245	0.054769	0.112442	0.0693278	0.0414249	0.0725612	0.0444602	0.0832397	0.0831907	0.0670999	0.0731871	0.0592584	0.0546484	0.0769956	0.0654273	0.0796968	0.0680454	0.0379479	0.0506514	0.0680718	0.0613736	0.0753105	0.0429711	0.0779534	0.0772785	0.071993	0.0643176	0.118264	0.110983	0.0603892	0.101067	0.0837202	0.0529169	0.0285355	0.0470811	0.0689284	0.0483339
7860					823.664	580.777	0.758521	3.44529	2.0623	3.35819	3.73302	3.1437	3.42258	4.34339	5.42649	4.15439	6.11489	2.45877	3.75657	5.18559	2.95915	4.06211	3.10425	2.26795	3.04237	5.5997	3.61996	6.40863	3.26276	5.17563	3.1172	2.92654	2.59437	3.79515	5.98896	2.74168	4.13945	3.31966	7.02999	3.75141	4.43224	2.63305	6.05961	4.99229	5.3431	1.51372	2.27519	4.07503	3.41578
8443					853.68	579.616	0.00986795	0.114411	0.047051	0.0353715	0.0294016	0.0629474	0.116098	0.02806	0.0541329	0.0439565	0.0488736	0.013771	0.0349284	0.0668723	0.0376738	0.047921	0.0437865	0.0354755	0.0365694	0.0943413	0.0500755	0.0869927	0.0201471	0.0662904	0.0166523	0.0344154	0.0291391	0.0381003	0.0519261	0.034487	0.117448	0.022694	0.0863186	0.119285	0.0450542	0.0744026	0.0816168	0.091704	0.0668763	0.021239	0.0305191	0.0567654	0.0818775
7864					823.66	550.851	0.166855	0.729908	0.58361	0.699788	0.625864	0.701079	0.613871	0.850282	0.975773	0.775367	0.796824	0.453234	0.664604	0.972916	0.68412	0.714064	0.631364	0.484672	0.657413	0.864794	0.68232	0.718188	0.678134	0.505417	0.580794	0.612701	0.642953	0.422855	0.451865	0.601167	0.875602	0.532214	1.0794	0.997376	0.769847	0.603954	1.01192	0.916751	0.726327	0.341976	0.457467	0.676345	0.765756
7166					787.659	513.35	2.37382	1.37558	1.14159	1.15851	1.34312	1.30722	1.46938	2.0387	2.16229	1.45202	1.58425	1.12575	1.27999	2.08156	1.18873	1.56552	1.15324	0.886315	1.39831	2.14847	1.51172	2.03952	1.07176	1.94279	1.10136	1.42875	0.940085	1.55683	2.08829	1.39427	1.52997	1.32716	3.08282	2.13956	1.38257	1.29588	1.37136	2.03698	1.63368	0.935213	0.992805	1.56458	1.32258
5782					703.575	470.058	0.178347	0.533356	0.588639	0.708227	0.397791	0.490612	0.542601	0.577776	0.48681	0.430692	0.651216	8.73873	0.374096	0.621703	0.606388	0.566071	0.548943	0.428168	0.465852	0.597462	0.926674	0.684741	0.476516	0.30254	0.391133	0.557009	0.463766	0.547475	0.667648	0.609324	0.664077	0.52841	0.762402	0.690998	0.669495	0.463134	0.748541	0.550649	0.542209	0.1409	0.550884	0.550592	0.441158
5778					703.575	447.378	0.411713	1.48485	1.0957	1.44127	1.16001	1.20309	1.69632	1.39943	1.63606	1.46591	1.99969	0.86284	0.567021	2.16717	1.59397	1.28363	1.1351	1.18976	1.16792	1.95706	1.34593	2.61776	0.856776	1.24721	0.978859	1.72911	0.58881	1.81064	1.62733	1.43684	1.96973	1.72727	1.6423	1.87482	2.00889	1.18864	2.52904	1.94049	1.49399	0.463393	1.26755	1.54997	1.32772
6834					769.555	437.605	0.466035	1.80163	0.923431	2.19602	1.56086	1.06552	1.44113	1.37452	1.76673	0.573268	1.10751	1.15831	3.03721	2.37583	1.67231	1.99539	1.24239	0.899502	1.84511	2.09049	1.52966	2.26888	1.43558	0.253307	2.11978	2.38867	1.6729	2.81257	1.8691	2.66437	0.876551	2.12455	2.90134	0.510352	1.98479	1.89797	2.02837	2.47512	1.8819	0.857545	1.92974	1.84767	1.648
7627					811.593	418.589	1.07747	2.5146	2.81145	2.31231	2.35556	3.15705	2.95548	3.1654	4.46817	2.60482	2.78643	2.59501	2.62136	3.08638	2.80501	2.72075	2.33526	2.20002	2.78824	3.11899	2.72399	2.5403	2.65526	3.09244	2.15065	3.07466	2.57121	3.06579	2.66142	3.0816	3.12546	3.30451	5.0328	4.00672	3.25847	2.33574	3.45789	2.45207	2.68151	1.73637	2.68936	2.94871	2.78091
7625					811.529	390.047	0.0146404	0.098374	0.068014	0.0897036	0.105502	0.104174	0.0805681	0.0806874	0.0934201	0.040836	0.179738	0.0249429	0.0343071	0.0891156	0.0684836	0.106976	0.0947722	0.0792762	0.119473	0.0933927	0.0833199	0.0455346	0.0654449	0.156328	0.0704947	0.0906258	0.0760972	0.1176	0.0424951	0.0831099	0.106067	0.0652579	1.7557	0.128741	0.0291482	0.0348617	0.165698	0.176327	0.0880927	0.101472	0.0584127	0.172875	0.0723598
7496					805.555	389.966	2.4363	6.24891	5.27336	8.07648	5.33802	5.76108	6.23316	6.85293	6.8066	7.60513	6.9291	3.43421	4.13632	8.76861	6.10502	9.58341	5.72171	4.12734	6.86409	8.02464	6.21632	11.3315	5.72982	6.61459	4.47399	5.71993	7.05572	6.27375	7.19363	7.09509	5.88939	6.35621	8.40158	6.69423	5.10104	6.35457	11.4425	10.5149	5.99669	3.88273	6.19409	6.9158	6.62681
6831					769.557	387.86	0.823947	2.60108	1.74533	1.98555	2.75351	3.81356	3.07142	3.08021	3.67084	2.13411	1.94072	2.88048	2.55037	2.14488	2.34081	2.73657	2.36691	1.86674	2.13096	2.23997	2.4439	3.82348	1.99817	3.29502	2.2018	3.70442	1.96285	1.84872	2.47857	3.26427	2.65881	2.87517	6.25021	3.26939	1.98102	2.38433	3.06785	1.78047	1.79769	1.87222	1.84133	2.71779	2.38142
7851					822.599	445.34	0.0205445	0.300477	0.374813	0.236823	0.3029	0.440141	0.316565	0.371751	0.706178	0.377745	0.330793	0.274039	0.171328	0.430841	0.224484	0.44095	0.178048	0.0896999	0.314006	0.353469	0.31278	0.582244	0.213757	0.544089	0.120476	0.44679	0.240997	0.345297	0.278843	0.355884	0.378106	0.490616	0.741114	0.499496	0.389758	0.199909	0.539582	0.375682	0.364052	0.021535	0.255223	0.369172	0.38818
5775					703.575	397.934	106.475	262.418	227.012	296.368	209.247	257.606	251.601	266.663	319.127	251.273	284.498	191.092	227.991	297.09	249.15	282.284	238.944	228.52	256.719	284.48	249.428	341.187	205.754	270.352	206.736	256.617	239.706	262.602	302.082	272.448	280.543	269.824	379.916	314.376	282.04	244.898	369.148	296.973	257.205	169.735	240.827	273.148	252.777
11915					1469.02	596.231	0.0341204	0.13683	0.0904836	0.136434	0.125088	0.156436	0.129195	0.143917	0.21721	0.160458	0.159684	0.098124	0.109161	0.213095	0.155151	0.18767	0.110251	0.184878	0.13576	0.232887	0.145842	0.214803	0.236857	0.183406	0.10055	0.132755	0.127775	0.142156	0.150829	0.146579	0.183531	0.190835	0.1756	0.18916	0.102411	0.134043	0.246008	0.197393	0.198827	0.0771915	0.159964	0.164534	0.151301
2415					422.324	104.971	0.000508869	0.0144375	0.0335611	0.0110488	0.00711299	0.00912424	0.00385165	0.0306946	0.0928384	0.00369812	0.0595108	0.00569245	0.0102288	0.0127261	0.00383277	0.0482212	0.00404831	0.00618436	0.0151853	0.0541267	0.0213317	0.00763908	0.00486783	0.0559121	0.00148362	0.0259689	0.0264419	0.0254783	0.0437026	0.00985288	0.0508511	0.00647325	0.0308	0.138351	0.0171323	0.00052308	0.0782994	0.0243897	0.00575411	0.00252757	0.00189372	0.0279171	0.0206528
7329					796.583	441.092	1.62284	7.41213	5.99828	7.46064	11.3709	11.3895	5.60001	9.76015	14.9166	10.2146	7.63327	7.31646	4.82064	8.4431	7.6647	12.928	5.78451	5.32975	8.35208	6.85897	8.04386	9.81172	7.26901	9.35554	6.3687	11.4431	6.66063	5.31579	6.43805	7.78721	7.08626	9.17917	18.2535	8.82457	6.67197	6.74552	14.3093	6.20265	7.84616	4.68678	4.71916	8.24874	8.54863
7601					810.527	351.483	0.0379531	0.207914	0.185405	0.270503	0.172099	0.254292	0.253417	0.250095	0.269323	0.22141	0.214127	0.136074	0.289395	0.279607	0.254177	0.295926	0.190787	0.147082	0.243759	0.250607	0.221198	0.401814	0.181997	0.257761	0.20614	0.214604	0.142922	0.266772	0.27946	0.271034	0.324341	0.281217	0.882817	0.312589	0.207229	0.160613	0.441075	0.346558	0.454022	0.275635	0.168145	0.303837	0.197335
7440					802.593	334.444	0.0596837	0.211773	0.0228575	0.193638	0.185993	0.265403	0.0549277	0.151647	0.0659699	0.0306279	0.533709	0.0357504	0.171467	0.129952	0.0787185	0.375427	0.225079	0.0981089	0.0756937	0.173973	0.15702	0.241964	0.114475	0.112767	0.0817108	0.182194	0.166624	0.0923114	0.171514	0.100733	0.0504479	0.0626928	0.14872	0.0728388	0.142331	0.283364	0.216784	0.0384487	0.322477	0.16536	0.245135	0.150645	0.091996
7157					786.507	327.504	0.0163682	0.196756	0.252995	0.209741	0.19564	0.262169	0.214334	0.208728	0.570875	0.28172	0.170753	0.147263	0.214601	0.394207	0.286478	0.240797	0.170242	0.0683997	0.197972	0.186866	0.224345	0.220468	0.196793	0.291621	0.198283	0.160749	0.12983	0.354541	0.272218	0.249094	0.308693	0.388003	0.36937	0.498882	0.514659	0.302118	0.484119	0.430036	0.143765	0.0979615	0.0205054	0.281585	0.299554
7603					810.561	303.37	0.00835439	0.029174	0.0117487	0.039697	0.0228213	0.0276888	0.00391825	0.0400474	0.0380194	0.0148672	0.0252674	0.00966865	0.00650551	0.025077	0.0191202	0.0482622	0.00254062	0.00326332	0.00710176	0.0328438	0.0207993	0.0501608	0.0193627	0.0241007	0.00779423	0.0409695	0.0220311	0.00992512	0.0398332	0.0107493	0.00610855	0.0057496	0.0164395	0.0111903	0.0285649	0.0257844	0.0134486	0.0131637	0.00900491	0.00434278	0.00687527	0.01828	0.0249181
7442					802.533	301.443	0.0223275	0.0166815	0.00928072	0.00390793	0.00720958	0.0121089	0.0082564	0.015644	0.0175526	0.00353687	0.017318	0.0171023	0.0526644	0.00796225	0.00962729	0.0179917	0.00534833	0.00378746	0.00552175	0.0133049	0.0133567	0.018584	0.00879018	0.0250565	0.00824179	0.0153481	0.00669318	0.00958649	0.05614	0.00303656	0.012623	0.0110392	0.0155535	0.0207991	0.0215569	0.0060674	0.013439	0.00294101	0.0106678	0.000166382	0.00797021	0.013715	0.0134248
7677					814.559	301.416	0.0378537	0.267434	0.075798	0.224277	0.125028	0.121991	0.130651	0.160093	0.136268	0.0603521	0.114321	0.118596	0.115005	0.109974	0.101177	0.1772	0.140974	0.0849796	0.072723	0.308672	0.134168	0.140648	0.12363	0.0841845	0.107459	0.213847	0.133008	0.0783113	0.184436	0.0566611	0.0398064	0.127629	0.287946	0.117806	0.100612	0.100599	0.219604	0.0715353	0.075471	0.0543026	0.0968793	0.120719	0.124983
8160					838.555	301.32	0.00305922	0.0760902	0.0168991	0.0667046	0.0507155	0.0378394	0.030541	0.0512932	0.0562612	0.0194541	0.0546974	0.0160439	0.0258464	0.0510092	0.0274879	0.0704466	0.0305142	0.0175821	0.0198091	0.0691968	0.0395746	0.0667632	0.0243084	0.0594157	0.0213566	0.0740703	0.0314295	0.0330593	0.0906338	0.0280791	0.0405438	0.0389458	0.0443624	0.0712976	0.0532406	0.0332193	0.0716446	0.024292	0.0293051	0.00423168	0.0294022	0.04348	0.0459313
7672					814.559	272.971	0.347149	1.00591	0.161286	1.19719	0.871939	0.849731	0.284163	0.958712	0.56081	0.0923481	0.768043	0.258196	0.794565	0.384256	0.825226	1.03961	0.507628	0.444983	0.16179	0.825204	0.616937	0.544232	0.637846	0.599795	0.416412	0.121312	0.503901	0.147446	1.03761	0.200711	0.390983	0.215056	1.05632	0.563219	0.328603	0.488775	0.409284	0.0921627	0.396082	0.25852	0.278227	0.434325	0.58068
8321					846.755	694.301	1.29244	0.782213	0.894693	2.21977	0.5199	0.583	0.728022	1.04842	1.99897	2.85357	1.41192	4.01513	4.65491	2.25234	1.37545	2.64761	1.33334	4.08917	1.05733	0.909217	1.83337	1.0646	0.663704	0.361316	1.0404	1.13646	0.450533	0.804468	1.02338	1.63756	0.577413	1.05333	1.03654	1.13909	0.534933	1.27037	0.942874	0.92661	2.03978	6.10338	1.26262	1.25347	1.52237
6700					760.573	424.344	22.1564	44.9997	38.3901	53.5918	45.3544	43.2954	41.9823	39.5439	42.8862	51.6409	48.8852	32.0448	37.937	53.9467	47.2397	60.6615	38.8284	40.1809	44.4851	53.8644	44.0957	60.3444	36.8268	43.0927	42.0034	39.405	45.2399	45.0747	53.7456	45.3766	42.9609	43.8367	70.0554	45.5007	38.7513	47.0012	65.9063	67.2719	47.2784	34.765	45.3543	47.9896	47.5349
6819					768.543	417.526	1.02107	2.14151	2.30162	2.72478	1.99924	2.78928	2.21897	2.54399	3.15764	2.3182	2.19965	1.90516	2.6017	2.61227	2.60385	3.46146	1.78447	1.687	2.91816	3.08114	2.40356	2.3327	1.86503	2.18383	2.16925	2.68918	2.14816	2.47625	2.22217	2.41831	2.75915	2.8478	3.22126	3.59997	2.15135	2.31058	3.31267	2.64405	1.95775	1.50137	2.42654	2.46187	2.36875
5530					688.587	535.611	0.129004	0.527634	0.337675	0.419274	0.541372	0.364496	0.336671	0.57809	0.645959	0.464745	0.652497	0.744626	0.647077	0.754921	0.651023	0.518103	0.286716	0.565819	0.338142	0.510055	0.500695	1.087	0.386955	0.34713	0.314429	0.466261	0.264454	0.379363	0.599337	0.295369	0.374387	0.321479	0.478482	0.336621	0.351867	0.323256	0.236784	0.316237	1.3822	0.287464	0.564005	0.455654	0.489112
8391					850.783	727.912	5.40037	2.57481	4.24306	8.05213	3.15011	2.49793	2.57402	4.81842	8.00067	9.7462	4.48551	22.0079	23.2369	7.24137	6.22178	15.6322	5.46886	13.6462	3.73086	4.21436	7.84718	3.83098	2.22741	1.83115	5.64241	4.05542	1.68139	3.72615	3.69283	9.44765	2.40721	4.33944	3.06952	4.99076	1.86507	4.77021	3.1176	3.00288	7.18734	24.085	4.66146	4.98159	5.70674
5535					688.58	523.287	0.0666345	0.253648	0.186202	0.20282	0.181039	0.156996	0.195928	0.285355	0.284787	0.272087	0.384398	0.25286	0.274151	0.331919	0.319824	0.245612	0.196558	0.182769	0.198724	0.293223	0.238277	0.393949	0.194823	0.196557	0.200177	0.250005	0.138344	0.177906	0.274038	0.175759	0.221721	0.154501	0.252706	0.19256	0.245814	0.165117	0.179705	0.21144	0.313991	0.14627	0.211092	0.214824	0.223419
6884					772.51	217.111	0.087697	0.299286	0.0516774	0.289082	0.240676	0.257129	0.0928618	0.332525	0.278047	0.0362836	0.360997	0.095208	0.223542	0.232251	0.321911	0.288692	0.150714	0.188256	0.0938939	0.289024	0.210488	0.189142	0.189573	0.162104	0.196134	0.277368	0.262917	0.0994005	0.429113	0.0662442	0.172943	0.115869	0.412214	0.195722	0.205595	0.173793	0.155169	0.0362514	0.160744	0.0937714	0.200146	0.189711	0.207216
6887					772.51	185.836	0.0485681	0.200477	0.027053	0.190772	0.0781675	0.0964408	0.0394772	0.23776	0.0643188	0.0194538	0.094441	0.0682147	0.155678	0.115438	0.0678155	0.176971	0.0791622	0.126294	0.0325964	0.195077	0.105709	0.13895	0.0697788	0.0322631	0.0707716	0.183127	0.084494	0.0599382	0.281506	0.0340406	0.0435305	0.0572481	0.0568624	0.120625	0.0486434	0.0860998	0.0794154	0.0184662	0.0564369	0.0591995	0.136308	0.0858852	0.0553497
8582					860.767	704.024	0.122677	0.0930199	0.111758	0.196821	0.0649868	0.0745389	0.0649737	0.132371	0.221758	0.386115	0.143727	0.430585	0.504411	0.18912	0.155244	0.455752	0.154592	0.383952	0.124982	0.0982663	0.205483	0.16624	0.101629	0.047522	0.0967195	0.138835	0.0611491	0.0715602	0.0787988	0.182679	0.0638375	0.10078	0.111279	0.0951564	0.0513323	0.111354	0.116493	0.0905952	0.221829	0.553709	0.152079	0.130679	0.183141
7286					794.509	382.547	0.0211662	0.0348956	0.00600955	0.036233	0.0230252	0.00854416	0.00699781	0.00741383	0.00483091	0.00825069	0.0115393	0.0018996	0.00881089	0.00860233	0.0354297	0.0143185	0.0154752	0.0246691	0.0209753	0.0104741	0.015478	0.0210029	0.00488593	0.00177285	0.00920002	0.0163869	0.00811774	0.00830255	0.0107061	0.0102991	0.0246044	0.004381	0.00615679	0.0120285	0.00449942	0.0255406	0.0228408	0.0244465	0.00700842	0.0504255	0.0219578	0.0147282	0.0100117
8124					836.611	513.125	0.0196111	0.174566	0.122253	0.184786	0.11205	0.131266	0.155176	0.142857	0.122309	0.161888	0.16267	0.0568669	0.157909	0.18324	0.140372	0.129402	0.102469	0.136482	0.145973	0.154874	0.134851	0.168688	0.135538	0.09797	0.105713	0.108023	0.0999493	0.116294	0.183113	0.0959069	0.132576	0.117701	0.228585	0.113765	0.15386	0.112572	0.20818	0.1407	0.123317	0.0713637	0.10196	0.130789	0.0715213
7119					784.575	412.774	26.8853	61.8285	64.4654	64.0703	65.161	79.6014	68.3531	69.9627	84.9942	75.1491	67.7343	62.2129	59.0854	72.9316	64.7097	66.6242	62.4336	62.3635	67.049	75.8476	66.0731	69.1575	58.366	77.9446	58.6322	66.4384	58.3276	65.9896	81.9453	70.9805	78.3625	75.2355	124.085	82.9918	64.6642	60.3789	75.8205	71.339	61.6395	47.4112	63.7595	70.6735	67.6758
8393					850.777	711.981	1.03591	0.653667	0.927506	2.13616	0.594678	0.559542	0.742515	0.983032	1.5179	2.53508	1.14717	3.49618	4.29199	1.94756	1.3228	2.56534	1.10439	3.31598	0.888255	0.810575	1.62881	0.994056	0.660569	0.408824	0.975805	0.920545	0.40735	0.735166	0.965844	1.76718	0.557158	1.07433	0.928044	0.924429	0.448133	1.15215	0.849146	0.970542	1.68009	4.76002	1.05808	1.11187	1.36487
6063					720.554	435.212	1.9187	9.50315	4.96861	7.05456	5.43188	7.42575	8.01145	9.33778	6.88488	5.07501	6.58965	7.9207	9.43404	7.37854	9.08046	11.5707	6.33917	4.85869	7.97118	6.35619	7.15555	14.6534	5.4409	9.00326	6.64119	12.5033	6.95284	5.51719	7.55823	8.7172	9.03413	7.70509	17.1908	9.13098	6.66773	7.09225	11.7166	7.41304	6.65413	5.07285	6.72756	8.56963	7.68875
6196					728.522	357.393	0.110728	0.275278	0.208719	0.22063	0.084538	0.266076	0.16276	0.324632	0.366278	0.129817	0.405703	0.1769	0.219353	0.307098	0.158735	0.316354	0.227139	0.197471	0.183139	0.656872	0.249911	0.172584	0.168088	0.273726	0.120755	0.446354	0.132448	0.168098	0.258922	0.389531	0.327804	0.307873	0.497425	0.346244	0.375554	0.112026	0.378451	0.232547	0.272534	0.14743	0.128397	0.26284	0.231905
7040					780.549	426.33	14.2628	13.2434	12.1454	13.2116	14.9824	13.4967	12.9254	13.8864	11.755	13.9348	12.8187	13.1933	14.0727	13.2205	13.2741	13.4074	13.5016	14.8117	12.9743	11.7688	13.3443	11.782	12.1343	12.1779	12.9644	11.6966	13.8587	10.8083	12.7394	14.001	11.9344	11.7822	26.9501	12.1131	11.9155	12.3254	12.3745	12.7582	12.8679	14.0164	13.0487	13.2125	10.6656
6263					732.546	392.044	0.096125	0.195357	0.0778887	0.127549	0.0768354	0.116805	0.0559194	0.130259	0.148405	0.0571441	0.145777	0.0966058	0.137368	0.0936669	0.123718	0.182764	0.114255	0.124304	0.0843241	0.139212	0.116214	0.159666	0.0221028	0.10187	0.123459	0.158807	0.0959527	0.0956775	0.134909	0.0899217	0.150378	0.132616	0.252377	0.133749	0.0960298	0.102188	0.141852	0.0822938	0.0933293	0.140931	0.098923	0.120352	0.118984
6034					718.649	721.432	0.106659	0.144535	0.142188	0.321358	0.0865517	0.0666603	0.0809379	0.261979	0.0458964	0.0763102	0.0490407	0.0533982	0.0929736	0.0381638	0.424114	0.160402	0.0798762	0.303935	0.0613986	0.124419	0.13604	0.0822397	0.0449266	0.0427486	0.0486614	0.143314	0.0413034	0.108886	0.11821	0.282679	0.0531302	0.450519	0.234052	0.0461495	0.10388	0.231597	0.28687	0.0596104	0.0633952	1.29389	0.0574134	0.189674	0.146228
6852					770.561	387.872	0.217148	0.69856	0.478954	0.541532	0.744157	0.989323	0.832343	0.803434	0.990652	0.571029	0.525814	0.748191	0.67844	0.544304	0.617472	0.71667	0.631681	0.498916	0.563822	0.595297	0.649387	1.02974	0.530548	0.880168	0.57805	1.03305	0.557502	0.485065	0.663336	0.890114	0.699087	0.7404	1.67938	0.865933	0.548693	0.631805	0.853299	0.470177	0.476841	0.501865	0.517887	0.731647	0.63302
7125					784.582	470.574	3.72716	17.2931	9.66829	1.9337	15.6034	0.464723	18.1588	15.2812	20.2876	17.8364	15.5436	12.162	17.4885	26.2772	16.7069	18.0423	14.9339	13.8039	13.2513	20.8279	14.4646	21.5535	12.7582	16.5363	16.3475	17.6903	13.2024	19.9656	20.5781	17.8575	16.1118	17.054	27.3854	18.0301	16.5331	16.7438	22.2816	24.864	18.8091	10.7085	18.49	18.175	16.2774
8962					880.589	355.504	0.0794651	0.325935	0.271204	0.37571	0.244816	0.348222	0.346754	0.283156	0.505013	0.541243	0.371323	0.160759	0.180716	0.5886	0.264831	0.49322	0.22951	0.180742	0.29878	0.513106	0.330155	0.468202	0.223644	0.396385	0.220125	0.339135	0.286363	0.441871	0.364588	0.465569	0.331426	0.437673	0.559551	0.733602	0.456982	0.302622	0.810418	0.759514	0.354707	0.169222	0.229359	0.417548	0.314542
2223					400.341	104.889	0.383762	0.926575	0.570455	0.80096	0.927696	1.7082	1.76157	2.24242	8.50411	1.87526	3.53004	2.28323	1.75583	2.63809	0.883643	3.06291	0.894773	1.59001	3.31578	3.00134	2.13283	1.43944	1.024	5.5949	0.867493	1.64837	0.595859	4.46789	2.1861	3.06881	5.69861	1.6713	1.35588	10.6645	1.44952	0.822691	5.6731	5.53228	1.03425	1.23742	1.22608	2.86292	2.33659
8543					858.59	387.257	0.217689	0.806352	0.86242	0.587004	0.688206	0.770162	1.77089	1.02004	1.41852	0.965488	1.07762	0.527801	1.21723	1.0796	1.04914	0.608402	1.03361	1.70506	0.676371	1.21998	0.96508	0.546237	0.745074	0.561428	0.577023	0.71013	0.620869	0.974004	0.871825	0.927819	1.41952	0.815188	1.98026	1.64033	1.47751	0.635205	1.05956	1.04233	0.776318	0.574076	0.452357	0.920353	0.851979
7378					798.592	489.41	0.112584	0.38845	0.409008	0.43905	0.255021	0.0429131	0.529846	0.453376	0.393389	0.430269	0.485163	0.261694	0.38737	0.61979	0.436063	0.332692	0.419913	0.378186	0.496837	0.456933	0.386427	0.0857859	0.227947	0.397752	0.240189	0.515336	0.27168	0.453945	0.434936	0.500318	0.559121	0.376589	0.826399	0.529794	0.525041	0.322584	0.515334	0.512497	0.42439	0.212224	0.286257	0.410906	0.387798
8136					836.769	718.592	0.142254	0.130077	0.119156	0.195599	0.0672697	0.106229	0.0810513	0.249543	0.198218	0.338604	0.0985557	0.469726	0.783141	0.231549	0.210097	0.449884	0.109791	0.340451	0.11638	0.14033	0.228895	0.162076	0.316151	0.0722897	0.136999	0.141171	0.0755268	0.148721	0.115122	0.184995	0.0815574	0.13505	0.155805	0.126639	0.0599118	0.12294	0.133485	0.105074	0.236653	0.479731	0.170042	0.157997	0.278322
9715					930.846	731.84	1.08791	0.968	1.16816	1.54409	0.728506	0.728143	0.691756	0.736359	1.22357	2.30307	1.37822	1.55347	1.44545	1.30203	0.820366	1.29285	0.87333	1.52145	0.839161	0.731806	1.14689	1.74917	0.655136	0.711859	1.2141	0.955694	0.740964	1.10025	1.07914	1.82331	0.580581	0.959729	1.12261	1.03985	0.655874	1.30088	0.929698	1.13182	0.959152	1.73418	1.12551	1.07847	1.07164
8984					881.747	713.687	1.02502	0.572367	1.16176	1.60977	0.590174	0.633137	0.530141	0.00346238	1.45676	2.73027	1.27786	2.50608	2.23393	1.49723	1.26921	2.37704	0.00235323	2.55319	1.15426	1.05276	1.31184	0.84254	0.516777	0.398911	0.748115	1.05989	0.445146	0.583544	0.821055	1.19441	0.626366	0.754481	0.821488	0.916124	0.469507	1.00535	0.664919	0.781155	1.34621	2.82175	1.26435	0.904104	1.17613
8982					881.736	696.922	0.0123015	0.00387708	0.0140052	0.010826	0.0050104	0.00471122	0.00399764	0.0036646	0.00320037	0.0217362	0.00735803	0.00464105	0.0179912	0.0183979	0.0133866	0.0352357	0.0183037	0.0265025	0.00829314	0.0118324	0.0122636	0.00864618	0.00148825	0.000508578	0.00431286	0.0127636	0.00256174	0.00443671	0.00780074	0.00523784	0.00162987	0.00716033	0.00589065	0.0132458	0.000775673	0.00947299	0.00738426	0.00523447	0.0166914	0.0488491	0.0117479	0.00879194	0.0121366
6925					774.526	173.363	0.0266238	0.0949237	0.018201	0.0840361	0.0720064	0.0776153	0.0272574	0.121456	0.0734163	0.00626232	0.143913	0.0501922	0.0878363	0.0794117	0.0846868	0.100553	0.0658124	0.091975	0.0262006	0.126928	0.0729654	0.0581676	0.0569826	0.0590999	0.0434466	0.0967311	0.0574912	0.0311125	0.177773	0.0230799	0.0680979	0.0412508	0.0966057	0.0662006	0.0567984	0.0551761	0.0691938	0.011677	0.0662135	0.0395218	0.063357	0.0618989	0.0841662
6923					774.488	152.512	0.00552861	0.0138956	0.00335555	0.0241958	0.0134798	0.0177861	0.00464767	0.0161298	0.0162827	0.000858342	0.00760764	0.00090782	0.0142288	0.0140698	0.00990627	0.0202977	0.00790691	0.0112834	0.00252764	0.00732821	0.0106112	0.0263302	0.0125649	0.0256471	0.00636705	0.0225803	0.0166758	0.0028548	0.0224639	0.00605864	0.00883588	0.0111527	0.00596171	0.0101915	0.0165478	0.0153095	0.00600597	0.00211487	0.01337	0.00472491	0.0121916	0.0123975	0.0119978
4485					622.604	544.682	0.0342557	0.150438	0.0938501	0.106701	0.123532	0.145693	0.114201	0.262	0.21705	0.153948	0.199802	0.19983	0.212418	0.273857	0.17049	0.233018	0.153976	0.118772	0.223376	0.355918	0.177156	0.172704	0.123844	0.128407	0.110365	0.199992	0.0918003	0.117696	0.150279	0.137678	0.13021	0.120211	0.279473	0.210695	0.106229	0.103843	0.1948	0.159735	0.175491	0.0889754	0.178428	0.149043	0.152857
7689					814.613	465.327	0.192924	0.509233	0.536817	0.541927	0.390592	0.463684	0.363065	0.520766	0.777235	0.626061	0.545314	0.354144	0.350518	0.492034	0.227508	0.32575	0.539351	0.478481	0.527611	0.396633	0.457982	0.440541	0.357027	0.90457	0.340825	0.53757	0.366954	0.969375	0.576302	0.644486	0.462543	0.439679	1.23915	0.705817	0.534665	0.494327	0.727111	1.12799	0.372096	0.412803	0.0939679	0.58739	0.504139
6896					772.575	477.308	0.356116	2.22331	0.984904	1.79006	1.73995	1.11076	1.8729	1.55525	1.88559	1.74006	1.58367	1.15722	1.97614	3.27774	1.62676	1.48707	1.66426	1.26518	1.66999	2.23912	1.6603	2.08961	1.45981	1.35366	1.81332	1.8325	1.61439	2.43671	2.34969	1.89092	1.55481	2.05861	3.77678	2.15677	2.41264	1.75311	2.4579	2.95313	2.17276	0.808349	1.95931	2.04524	1.70492
6890					772.575	406.935	0.00703512	0.0964524	0.00843875	0.0724075	0.0803741	0.0511398	0.054949	0.0199049	0.0758762	0.0537025	0.0467105	0.0240528	0.0302973	0.0513474	0.0513548	0.141811	0.0334477	0.0210374	0.0612615	0.0437553	0.0512678	0.2096	0.0201185	0.0633536	0.0354502	0.0645375	0.0580901	0.0298875	0.0434449	0.0470335	0.0522557	0.0672174	0.0385855	0.0346621	0.0768781	0.0858382	0.135054	0.0783288	0.119945	0.0461406	0.076738	0.0691579	0.0608729
9384					905.744	699.336	0.519053	0.479983	0.682794	0.950629	0.366758	0.40947	0.425104	0.345653	0.597194	0.91158	0.583068	0.645821	0.630781	0.540441	0.357724	0.639176	0.393393	0.698978	0.427598	0.377121	0.549116	0.656278	0.316776	0.300295	0.573438	0.42607	0.345401	0.513235	0.515115	0.904693	0.156503	0.545725	0.56495	0.795497	0.369942	0.622825	0.630501	0.640358	0.364472	0.810695	0.439169	0.524597	0.530825
8979					881.754	729.885	5.23378	2.30849	3.7118	5.42428	2.40174	2.70605	2.12608	4.3768	5.20128	7.37667	4.54236	10.2829	9.3108	5.62753	6.13676	7.99869	6.6438	11.24	3.89186	4.62483	5.55832	3.32754	2.14824	1.73947	3.16163	4.21963	2.07802	2.36249	2.94594	4.75277	2.52872	3.10229	3.21041	3.45259	1.97632	3.54309	2.96127	2.82763	4.95972	12.4968	4.68084	3.62377	4.03585
5056					660.545	466.417	0.0422569	0.173639	0.164873	0.150519	0.118183	0.182887	0.218718	0.215854	0.206374	0.239468	0.243271	0.183411	0.140278	0.266363	0.213938	0.207165	0.127787	0.109514	0.203585	0.277773	0.184293	0.255264	0.156907	0.176127	0.122771	0.139941	0.149118	0.136396	0.175499	0.138731	0.162992	0.11579	0.270521	0.126004	0.17446	0.118721	0.197973	0.181795	0.121602	0.0874736	0.130341	0.156921	0.185642
9351					903.73	680.968	0.330571	0.075575	0.15413	0.247568	0.0622749	0.0946544	0.0887582	0.213024	0.160192	0.764443	0.122769	0.382521	0.120102	0.350782	0.0946523	0.404656	0.230622	0.485776	0.261012	0.0910871	0.236758	0.135216	0.0601241	0.041307	0.0670478	0.247876	0.0547978	0.0694289	0.10578	0.165507	0.0521768	0.0725351	0.0846013	0.114579	0.0645203	0.114444	0.121473	0.177188	0.199153	0.588102	0.115361	0.132561	0.122518
9734					932.863	755.84	0.0370196	0.0136842	0.0244317	0.0760636	0.01196	0.0196188	0.0172172	0.0102526	0.0178855	1.10595	0.01454	0.0150123	0.0277334	0.0155931	0.0122026	0.0386855	0.0091581	0.0181152	0.019081	0.0117224	0.0757962	0.038708	0.00940743	0.0152421	0.156491	0.0214667	0.0070416	0.0198675	0.0151413	0.033699	0.00821809	0.0276194	0.00918416	0.0297403	0.00580999	0.0191654	0.0146356	0.0123661	0.0081135	0.0844531	0.0101602	0.0273265	0.0232839
9716					930.848	750.343	0.702478	0.974892	0.747389	0.983884	0.828615	0.591952	0.652461	0.48277	0.936165	2.38839	1.12293	1.28331	1.14801	1.22158	0.516688	0.630283	0.589175	0.81994	0.543868	0.484959	0.882487	2.02887	0.5681	0.833413	1.05351	0.608004	0.723005	1.15821	0.947906	1.64143	0.364352	0.884253	1.33101	0.871063	0.498958	1.1554	0.953069	1.3174	0.824334	1.10055	0.972697	0.991777	0.928467
8527					857.744	727.912	0.348951	0.235489	0.316466	0.51826	0.257752	0.240331	0.241682	0.368249	0.434435	0.499029	0.311653	0.791751	0.907317	0.521255	0.480284	0.748833	0.359692	0.730377	0.332309	0.301817	0.447297	0.275866	0.221219	0.17079	0.362213	0.335743	0.178697	0.238117	0.305807	0.489754	0.24143	0.327657	0.318036	0.329579	0.201923	0.35514	0.268379	0.260599	0.56014	0.842381	0.359122	0.33213	0.383691
9446					909.729	707.76	0.0227337	0.0360878	0.0335424	0.0227902	0.018665	0.0364004	0.0456256	0.0186275	0.0493838	0.0497429	0.0588546	0.0373934	0.0268789	0.0290874	0.0177131	0.0257002	0.0192572	0.0281823	0.0210249	0.019988	0.030884	0.0563259	0.0293849	0.0470451	0.0173753	0.0167978	0.0185832	0.0533478	0.0416524	0.062763	0.024069	0.0504948	0.0725255	0.056205	0.0377769	0.0396259	0.0654377	0.0362944	0.0175172	0.0265897	0.0284462	0.0399129	0.0336303
8770					870.752	680.982	0.79038	0.303874	0.576554	0.933175	0.236769	0.292303	0.464482	0.384965	1.03517	2.42975	0.842599	1.78623	1.517	0.809601	0.535997	1.2783	0.61396	2.11217	0.45501	0.387261	0.889278	0.413861	0.230243	0.122265	0.289655	0.579948	0.19875	0.365777	0.460825	1.29053	0.223898	0.3135	0.349464	0.481822	0.219229	0.509572	0.405379	0.499403	0.837438	2.76573	0.66011	0.56087	0.632047
1954					370.259	46.246	0.0560012	0.00798077	0.0242535	0.0449579	0.0102361	0.0843127	0.00528631	0.00270516	0.00669281	0.0673813	0.0429978	0.0336349	0.0112778	0.0657273	0.0393802	0.0086511	0.0735794	0.0328967	0.0329632	0.00918708	0.0330052	0.00376035	0.0475943	0.0518102	0.00545775	0.00483891	0.0377956	0.00611925	0.0795152	0.0125719	0.068183	0.0063798	0.0561884	0.00476257	0.190956	0.0669337	0.00725814	0.0243568	0.0338009	0.0422642	0.0661748	0.0408361	0.0787698
9374					904.821	713.731	0.427948	0.200178	0.425529	0.617509	0.233688	0.241089	0.219422	0.361945	0.6569	1.22656	0.562681	1.17309	0.792881	0.625946	0.537537	1.02693	0.607863	1.18607	0.481281	0.419212	0.601213	0.338911	0.198339	0.157368	0.305599	0.383918	0.16162	0.245557	0.37364	0.454619	0.247309	0.27376	0.329986	0.332986	0.182075	0.374808	0.269322	0.342176	0.5806	0.970943	0.603825	0.356368	0.527563
8951					880.581	320.944	0.00731673	0.0960665	0.0518984	0.0832859	0.0596778	0.0475805	0.121445	0.063537	0.101948	0.0875247	0.0442715	0.0306304	0.0753733	0.161053	0.0620516	0.107376	0.0607557	0.0367852	0.0703021	0.126868	0.0747874	0.113918	0.0616919	0.0788484	0.0940303	0.0757099	0.0629731	0.174187	0.118482	0.14605	0.0861564	0.120573	0.190991	0.180951	0.146655	0.107884	0.173613	0.217905	0.0802456	0.0256094	0.0881969	0.117234	0.0934958
8523					857.792	777.942	0.0604621	0.110839	0.0366177	0.125342	0.138096	0.0892993	0.0455332	0.172698	0.0159361	0.0539585	0.0381606	0.019475	0.0262174	0.0227148	0.289914	0.0942974	0.0719966	0.201406	0.111651	0.126228	0.0925422	0.0883849	0.0407377	0.0309835	0.0220964	0.039377	0.0193443	0.0782035	0.120913	0.0216943	0.0346456	0.0966738	0.0907945	0.0251919	0.0533344	0.231064	0.201871	0.0617479	0.0291163	0.0721428	0.0260207	0.0692169	0.084106
8524					857.757	744.131	0.623364	0.638599	0.757424	1.85512	0.828532	0.760396	0.983719	0.649552	0.912304	0.897017	0.676885	1.93509	1.41018	1.06625	0.636831	1.98824	0.597909	1.7254	0.671252	0.644365	1.01292	1.04155	0.514751	0.731972	0.790196	0.630934	0.606027	0.803102	1.12396	1.54262	0.605387	1.15286	1.27268	0.920081	0.402623	1.14879	0.827904	1.05859	0.844183	2.27945	0.635175	0.946642	0.930095
6610					754.535	418.057	1.23252	1.16444	0.35452	0.910409	0.535141	0.430079	0.623561	0.742477	0.611401	0.370229	0.613515	0.801145	0.887604	0.276376	0.790292	0.69827	0.582953	0.578475	0.57317	0.552681	0.666463	0.586438	0.497636	0.413092	0.634309	0.729553	0.75114	0.421909	0.383082	0.541494	0.582983	0.498759	0.136818	0.71911	0.113098	0.49897	0.44027	0.470182	0.674672	0.983942	0.706891	0.539217	0.574917
9773					935.879	727.625	0.0853684	0.0573537	0.0925836	0.135579	0.0535864	0.060187	0.0595616	0.0982911	0.100157	0.168205	0.0820272	0.285036	0.257458	0.129551	0.129883	0.220519	0.0841715	0.223151	0.0822575	0.081058	0.124299	0.0599164	0.0588183	0.0431892	0.0840704	0.0868805	0.0394517	0.0481256	0.0831694	0.124338	0.0593797	0.096191	0.0638536	0.0799917	0.0454896	0.0999032	0.059733	0.0644077	0.149201	0.263291	0.0979082	0.0853654	0.115361
4900					650.635	573.75	0.19281	1.00739	0.591183	0.857763	0.397953	0.785572	0.6891	1.51201	1.63002	1.16688	0.854306	0.915941	1.09977	1.61375	0.982728	1.56055	0.831602	0.829884	1.20032	2.1018	1.04107	0.582051	0.770386	0.881453	0.662636	1.11606	0.632384	0.76812	0.398053	0.695537	0.619232	0.810534	1.2999	1.86754	0.877079	0.628559	1.50994	1.17421	1.10263	0.419755	0.741486	0.877877	0.594475
9045					885.778	736.964	0.0411372	0.0683591	0.0654415	0.057902	0.0359634	0.0394903	0.0707471	0.037188	0.082118	0.0982652	0.0835574	0.0649673	0.071672	0.0436704	0.0320017	0.0315608	0.0212666	0.0509404	0.0335233	0.0275068	0.0528639	0.138007	0.0355841	0.0727426	0.0404181	0.0336377	0.0216569	0.0933888	0.0752671	0.106818	0.0325773	0.0797071	0.0986278	0.0864741	0.0492757	0.0675921	0.0692899	0.0530208	0.0374484	0.0922281	0.0445797	0.0664171	0.0541776
3525					538.519	454.989	3.87595	8.21532	4.14005	6.99329	4.93287	8.2085	4.44661	9.39259	11.9889	7.53293	9.25466	7.73785	9.06975	10.4236	11.0922	10.9927	7.88866	7.77976	9.71493	11.0093	8.23452	7.61096	6.43596	4.45128	6.21066	9.50578	7.50287	6.18012	6.3096	6.8207	6.57562	8.22535	8.45188	8.49046	5.64742	5.90876	8.73966	6.52416	8.58913	5.45597	10.7394	7.21879	7.09647
9372					904.833	746.617	1.64831	1.1073	1.57479	0.0246616	1.00028	1.0696	0.809761	1.08347	1.51097	3.11627	1.57344	2.85606	2.71925	1.7002	1.3512	2.4327	1.27118	2.32991	1.04383	0.989176	1.56062	2.53798	0.835352	0.919894	1.33054	1.28241	0.976175	1.17051	1.42052	2.62639	0.673651	1.26201	1.30207	1.26799	0.659354	1.70988	1.3716	1.32656	1.33695	3.436	1.48185	1.44638	1.51305
1983					372.311	77.1039	0.021837	0.101593	0.063018	0.0974936	0.0847794	0.187177	0.195933	0.301715	1.28401	0.217643	0.507748	0.268789	0.229102	0.307188	0.18306	0.420666	0.0746714	0.214046	0.422533	0.456235	0.281962	0.17791	0.0820637	0.442352	0.0920418	0.231658	0.086113	0.508819	0.349739	0.26424	0.818071	0.216178	0.141703	1.06826	0.226094	0.124919	0.982148	0.609943	0.170901	0.190124	0.189215	0.348625	0.299295
8489					855.73	712.025	0.479168	0.323598	0.372674	0.793474	0.323708	0.301633	0.35291	0.42919	0.61955	0.780951	0.460733	0.983489	1.32723	0.736028	0.527687	0.952214	0.492273	0.997498	0.416567	0.356202	0.601339	0.415107	0.295399	0.221149	0.417034	0.411257	0.216773	0.307889	0.443747	0.711114	0.267686	0.449017	0.509476	0.42795	0.218453	0.502764	0.391533	0.446892	0.704372	1.47352	0.454382	0.464276	0.496418
9449					909.812	740.227	0.00654112	0.0104131	0.00868298	0.00837639	0.00903751	0.0101787	0.0161506	0.00435822	0.0165211	0.0372046	0.0225708	0.0108814	0.0137342	0.00759284	0.00759591	0.0331729	0.0091815	0.0130151	0.00796871	0.0123022	0.013274	0.0536259	0.00536733	0.0198198	0.0103167	0.0119197	0.0077676	0.0153773	0.0170634	0.0154001	0.0173765	0.0116763	0.0257828	0.0147331	0.00623525	0.0115575	0.0131081	0.0109239	0.0128173	0.0174708	0.0128565	0.0155598	0.0115811
9450					909.864	725.533	0.0136418	0.0120564	0.0105798	0.0327462	0.0207451	0.0172707	0.0211463	0.0247347	0.0155522	0.0938722	0.0316786	0.0532047	0.0385484	0.0229126	0.0262944	0.0406126	0.0111512	0.0387189	0.024583	0.0221273	0.0286089	0.053943	0.0150682	3.55792e-05	0.0315676	0.0162302	0.00995059	0.0287694	0.0394748	0.0389801	0.00992395	0.0356382	0.0219647	0.0183079	0.0331007	0.0305818	0.0156531	0.028238	0.021559	0.101387	0.0148831	0.0282629	0.0357977
1914					368.279	52.7865	0.0151635	0.00525975	0.0129798	0.0110972	0.0100425	0.0184885	0.0314506	0.00451411	0.0919443	0.00547655	0.0364765	0.00618758	0.00612858	0.104828	0.0185045	0.0252044	0.0246805	0.0808428	0.0303631	0.0412299	0.0290431	0.00482302	0.0071758	0.00717222	0.00256566	0.00890972	0.0176219	0.12234	0.0348097	0.0441731	0.0506292	0.0249203	0.0189706	0.0921625	0.013309	0.00910599	0.121578	0.152374	0.00746708	0.0115271	0.0152788	0.0383457	0.0217068
10433					999.729	653.346	0.00513255	0.058406	0.0292012	0.0102867	0.0131888	0.0154447	0.0365413	0.0425882	0.158737	0.169734	0.233385	0.0696815	0.0634408	0.0562992	0.020331	0.0247694	0.0197002	0.0268638	0.0172662	0.0192866	0.0545142	0.0527736	0.0417174	0.135549	0.0244206	0.024441	0.0254636	0.060895	0.0466554	0.0484591	0.0298122	0.0420393	0.0663738	0.118676	0.0786804	0.0436919	0.107752	0.0751587	0.0371229	0.00897103	0.0321244	0.0550389	0.0461279
8444					853.725	712.003	2.59342	1.73508	2.37761	4.76021	1.76869	1.67737	2.10928	1.05132	3.28821	4.49205	2.67749	5.89932	7.34422	4.04901	3.21036	5.23846	2.74314	5.65493	2.35249	2.19028	3.36065	2.47702	1.61422	1.3014	2.31389	2.35319	1.17355	1.79972	2.67234	3.87509	1.57001	2.61505	2.72329	2.41381	1.30036	2.91469	2.17042	2.55536	3.92581	8.18133	2.61	2.62803	3.0254
9223					895.713	713.578	0.214644	0.14913	0.252941	0.35457	0.139773	0.14069	0.131112	0.206605	0.341833	0.513997	0.268203	0.484008	0.477271	0.320943	0.292157	0.478094	0.327101	0.533405	0.259207	0.244021	0.306485	0.181361	0.119957	0.100084	0.195254	0.225717	0.0976574	0.140204	0.173477	0.250446	0.189693	0.200109	0.194142	0.201258	0.0983756	0.206583	0.161403	0.234969	0.3115	0.50642	0.271968	0.203029	0.248992
8900					877.725	696.96	3.01377	1.37373	3.38445	4.68673	1.70818	2.10503	1.63341	2.36106	3.61017	4.02939	3.12281	5.95632	4.34386	3.83911	3.15131	6.4689	3.88465	6.90698	3.25368	2.83675	3.58351	2.34816	1.26649	0.890648	1.69193	2.44953	1.2624	1.33229	2.37259	2.99478	1.68815	1.95703	2.08744	2.53878	1.24767	2.70161	2.17393	2.71752	3.60774	7.76455	3.3205	2.42069	3.27703
10404					996.797	661.481	0.0281808	0.227307	0.0814619	0.0351234	0.0311806	0.0338716	0.130596	0.135946	0.400224	0.548301	0.758633	0.0685149	0.229442	0.204658	0.0562126	0.0231389	0.0632228	0.0764835	0.0733114	0.0812515	0.164353	0.125589	0.108905	0.227641	0.117124	0.0652293	0.0719634	0.22955	0.108535	0.133961	0.0900814	0.148358	0.22009	0.25667	0.270588	0.10705	0.291034	0.209065	0.0643393	0.0353452	0.0685153	0.147482	0.129866
10407					996.711	638.1	3.3905e-05	0.00853389	3.40527e-05	0.00664871	0.00330296	3.71741e-05	0.000480804	0.00479452	0.0302249	0.0210262	0.0254389	0.00345905	0.00306067	0.00695743	0.000525189	0.00585647	0.000261429	0.00156673	0.000768584	0.00741823	0.00652149	0.00528033	0.00255742	0.0167315	0.000808019	0.00130975	0.00107446	0.00668287	0.00260987	0.000611199	0.00174096	0.00776443	0.00172377	0.0166348	0.0150597	0.00332188	0.00909484	0.00337125	0.00190877	3.37397e-05	0.00187775	0.00500987	0.00574185
9928					949.715	653.017	0.00800296	0.0382044	0.00732216	0.00995377	0.00369998	0.00480003	0.00552769	0.00283622	0.0677211	0.0603123	0.0477617	0.0282639	0.0279233	0.0170219	0.00201679	0.00627797	0.00228487	0.00841816	0.00304562	0.00278279	0.0177089	0.0308662	0.00844178	0.0183339	0.0103636	0.00424388	0.00506153	0.042061	0.0168417	0.0309998	0.00257727	0.0416171	0.0161522	0.0559572	0.0208089	0.0228085	0.0270392	0.0219128	0.00956236	0.00839263	0.00626535	0.0200153	0.0177514
9303					900.799	697.238	2.03927	0.952098	1.93954	4.21523	0.841329	1.0642	0.902819	1.47574	2.30834	7.69145	2.33748	3.88542	2.97395	2.35578	1.57293	3.76133	2.02019	5.24413	1.72569	1.41848	2.53627	1.77009	0.689824	0.542222	1.07698	1.38302	0.697948	0.908935	1.37183	2.18365	0.962759	1.1137	0.00739621	1.59294	1.08894	1.91538	1.44447	2.01926	2.06772	5.69979	1.83217	1.51845	2.45046
9300					900.711	676.616	0.150738	0.220304	0.15346	0.355386	0.0870017	0.145091	0.139807	0.109492	0.395057	0.161535	0.197818	0.33781	0.24711	0.183222	0.112554	0.173992	0.139343	0.207537	0.098222	0.0878199	0.185165	0.274904	0.101037	0.0900239	0.203109	0.16256	0.13107	0.234486	0.178323	0.440764	0.0852684	0.257661	0.228544	0.354609	0.141481	0.254617	0.273629	0.285357	0.178958	0.258466	0.186177	0.216052	0.232217
9724					931.762	706.047	0.348024	0.501251	0.568177	0.695538	0.306127	0.283116	0.344311	0.274998	0.456136	0.687119	0.669064	0.29314	0.153224	0.240122	0.213709	0.263655	0.247785	0.30141	0.295315	0.287999	0.371511	0.600367	0.00459613	0.363363	0.483675	0.278846	0.292399	0.488964	0.423288	0.845947	0.240578	0.476851	0.648289	0.556498	0.37179	0.529773	0.535939	0.579374	0.24048	0.434039	0.288912	0.434198	0.414452
7948					827.699	692.138	0.0546164	0.0368366	0.02548	0.0668941	0.0218431	0.0343076	0.0413168	0.0814724	0.0731129	0.0568902	0.037229	0.150723	0.256837	0.116157	0.0767156	0.109379	0.0561378	0.156184	0.0413426	0.0463987	0.0769937	0.0515031	0.0663396	0.0156352	0.0621558	0.0580056	0.0247405	0.033579	0.0469794	0.0571974	0.0309844	0.0564365	0.0641786	0.0381043	0.028358	0.0565876	0.0506412	0.0427501	0.113353	0.268944	0.0487938	0.0607633	0.0757326
8410					851.708	694.301	1.0337	0.627134	0.589233	1.31976	0.489025	0.525072	0.568993	0.876512	1.30979	1.24471	0.827502	2.14037	2.86055	1.5552	1.0827	1.82391	1.12281	2.48964	0.823837	0.771531	1.2041	0.744584	0.548614	0.278562	0.805415	0.916866	0.412474	0.571866	0.749279	1.01273	0.482176	0.738513	0.918327	0.770868	0.431435	0.869205	0.693887	0.630724	1.52009	3.02322	0.895164	0.8507	0.952401
8903					877.714	680.273	0.14168	0.0859608	0.142217	0.238112	0.0660542	0.0795315	0.0842379	0.0937071	0.202911	0.323735	0.114744	0.310495	0.220944	0.172667	0.137381	0.263338	0.153544	0.369689	0.10917	0.101086	0.17056	0.110781	0.0620117	0.0126638	0.104811	0.112819	0.0566599	0.079986	0.127811	0.17727	0.0649547	0.100395	0.118419	0.141948	0.0525255	0.130298	0.106111	0.10874	0.157604	0.445527	0.138791	0.120506	0.147442
10448					1001.76	678.128	0.0841205	0.671238	0.273785	0.112924	0.145422	0.117213	0.342006	0.307027	1.06775	1.3134	1.59523	0.178389	0.950833	0.543299	0.227896	0.173004	0.170248	0.297869	0.22427	0.221059	0.450849	0.475994	0.314325	0.744613	0.374537	0.215534	0.181392	0.495823	0.348267	0.35079	0.188742	0.317916	0.648254	0.725651	0.946601	0.316028	0.454126	0.462558	0.309445	0.0779877	0.310476	0.412953	0.393836
8413					851.7	676.514	0.0567476	0.0413127	0.032356	0.0902918	0.0348933	0.0360206	0.0430463	0.0530599	0.0831754	0.0855331	0.0496316	0.111396	0.131826	0.0809059	0.0602987	0.11819	0.0639489	0.144842	0.0482705	0.0515899	0.0708668	0.0623425	0.0262217	0.0215621	0.0522851	0.054127	0.0336974	0.038316	0.0577073	0.068341	0.0335743	0.0462178	0.0674788	0.0504078	0.031082	0.0601542	0.0619911	0.0529343	0.0837929	0.21976	0.0403641	0.0581178	0.0668741
9438					909.785	746.82	1.03644	0.721816	0.883855	1.18333	0.677792	0.698544	0.502157	0.714578	0.915856	1.56139	0.926276	1.25211	1.43052	1.02354	0.69903	1.31408	0.797235	1.29115	0.648032	0.609054	0.944339	1.32588	0.552734	0.563109	0.801994	0.787883	0.672985	0.700909	0.809933	1.41512	0.434557	0.774678	0.913679	0.777967	0.423533	0.897872	0.818258	0.792952	0.821516	1.56227	0.873296	0.836056	0.837163
8888					876.802	729.438	8.57838	4.16969	8.44505	13.882	5.58763	4.79361	5.35929	8.58654	11.6477	23.3497	10.9399	29.58	28.2561	17.5953	10.9788	21.8227	10.6939	26.0006	8.05481	6.67651	13.2499	7.31162	4.95197	3.11223	6.32128	11.3143	4.48395	6.21778	6.05343	15.2809	4.40586	6.10822	7.01795	9.35266	4.45706	7.8492	5.43649	5.52686	10.3325	31.6336	10.949	8.40584	10.1824
9677					927.738	694.504	1.79058	2.95896	1.42104	3.30965	1.61101	1.36137	2.13302	1.60483	3.84451	2.12796	2.31758	0.806087	3.02856	2.52838	1.43249	0.949406	0.711375	1.92841	1.43787	1.35211	1.93276	2.83379	1.55089	1.8721	2.65831	1.8686	1.64674	3.36063	2.56982	4.97538	1.56982	3.15419	3.19218	4.37697	2.17365	2.40183	3.7234	3.28411	1.48764	0.967657	1.98031	2.5824	1.92404
9723					931.77	721.302	1.98981	1.54249	2.67199	3.21654	1.69258	0.826028	1.03077	0.755262	2.61265	2.99724	1.87977	1.84097	2.03721	1.77822	0.748035	1.22298	1.02143	1.48009	0.955982	0.821438	1.65607	1.73048	0.901404	2.06694	2.69629	0.816424	1.77499	1.54363	1.2238	4.1905	0.56236	2.56569	1.92938	2.84344	1.48414	2.35463	1.44727	1.71523	1.19549	1.7016	1.00796	1.78758	1.1334
7614					810.598	497.183	0.660518	1.81877	1.42714	2.04548	1.78666	2.24255	1.96519	2.14427	3.06923	2.34115	2.24733	1.81609	1.64646	2.48721	1.57924	1.95996	1.93228	1.717	1.63797	1.96583	1.92452	2.48853	1.47828	2.21219	1.47484	2.28453	1.71632	2.20625	2.25927	16.3124	2.12684	2.1417	3.92626	17.5779	1.97148	1.78826	3.05094	2.42423	2.03199	1.31893	1.51942	3.61553	1.80125
8890					876.794	713.056	2.89034	1.55071	3.05842	5.03066	1.52637	1.55402	1.59164	2.33403	4.4236	9.49255	3.77607	8.97942	7.60587	4.70064	3.42585	7.61803	3.68321	9.05469	2.86716	2.45415	4.38087	2.60403	1.33197	1.0491	2.20741	2.68455	1.09755	1.69161	2.3724	4.08147	1.52256	2.22763	2.17443	2.55034	1.25472	2.74066	1.90846	2.28565	3.85032	9.99298	3.53999	2.65839	3.44271
8858					874.731	744.01	0.00836156	0.0214391	0.0080061	0.0286519	0.022603	0.0195145	0.0255088	0.0129994	0.0241953	0.00958678	0.0151783	0.0335324	0.0223973	0.0289892	0.00689332	0.0291054	0.0168829	0.0116329	0.0176587	0.0130509	0.0188094	0.0208497	0.0117608	0.0167801	0.0222674	0.0186648	0.0198863	0.0226046	0.0301687	0.0382903	0.0178401	0.0264072	0.0507045	0.0273958	0.00931944	0.0264343	0.0124124	0.0262289	0.0219937	0.0254598	0.0101232	0.0227796	0.0221848
9595					920.764	660.695	0.0327747	0.0490912	0.0309268	0.00274434	0.0113098	0.0142919	0.0229977	0.017247	0.0946779	0.0992334	0.103557	0.297202	0.0682188	0.0548931	0.0199511	0.0361091	0.0269072	0.0458824	0.0154394	0.016906	0.0530181	0.0625611	0.0226468	0.0304846	0.0363613	0.0185999	0.0199521	0.0652874	0.0460798	0.079214	0.0125096	0.071232	0.0518257	0.0852099	0.0390758	0.0548121	0.0690398	0.0707452	0.0375994	0.067492	0.0375616	0.0489145	0.0508992
9132					890.813	720.769	0.100846	0.0656133	0.0896186	0.14418	0.0643398	0.0611704	0.0468044	0.098942	0.161582	0.26048	0.107787	0.313839	0.364628	0.0211752	0.125533	0.310678	0.11111	0.30619	0.0834716	0.0828302	0.146041	0.142955	0.0779986	0.0425465	0.0855726	0.103627	0.0511438	0.0640231	0.0695201	0.129548	0.0515523	0.0760111	0.0869574	0.0109209	0.0406459	0.0893183	0.0776139	0.0751403	0.155125	0.331337	0.127079	0.0944318	0.129034
9044					885.785	760.218	0.242383	0.160632	0.201379	0.37252	0.267949	0.2149	0.240996	0.160716	0.247893	0.304104	0.192539	0.439199	0.338196	0.297282	0.128999	0.301613	0.161685	0.200648	0.160605	0.148947	0.239159	0.295886	0.144787	0.234605	0.17059	0.166467	0.191589	0.210186	0.292984	0.595564	0.1631	0.29515	0.377888	0.267244	0.10244	0.321146	0.237583	0.2889	0.229004	1.00798	0.14252	0.28678	0.237615
9793					937.807	750.805	0.068942	0.108239	0.064609	0.0851745	0.0895812	0.0497416	0.0715248	0.0432609	0.0814223	0.190543	0.109526	0.0651369	0.109245	0.141167	0.0478782	0.0449704	0.0579177	0.0768413	0.0489292	0.0465433	0.0800597	0.191108	0.0618091	0.082021	0.106462	0.0605606	0.0789414	0.129286	0.111738	0.145936	0.0313894	0.0774761	0.143894	0.0834956	0.0535792	0.0996379	0.0928391	0.142043	0.0898172	0.0617982	0.109948	0.097689	0.0822571
9819					939.856	747.129	0.0477053	0.0422365	0.0841044	0.0454129	0.0245533	0.0313813	0.0426436	0.0234253	0.0632634	0.0858895	0.0514346	0.07888	0.0686764	0.0348428	0.0300271	0.0392591	0.0161707	0.0450203	0.0267507	0.0196183	0.0450648	0.114141	0.0273284	0.0579772	0.0297806	0.0293159	0.0184427	0.0466064	0.0403718	0.0915128	0.0228813	0.0450786	0.0650214	0.0559066	0.0262471	0.04333	0.0347351	0.0459956	0.0401287	0.0785422	0.0323316	0.0472837	0.041442
9473					911.788	746.906	0.183226	0.119676	0.143448	0.216593	0.120011	0.128134	0.0794211	0.129477	0.141813	0.246936	0.159266	0.194284	0.24677	0.184938	0.121055	0.247459	0.149802	0.239299	0.116149	0.113138	0.164045	0.168728	0.0934125	0.0739324	0.142253	0.147301	0.12148	0.0998783	0.12575	0.224407	0.074052	0.120141	0.147736	0.129413	0.0712633	0.14749	0.13336	0.134243	0.134417	0.279072	0.144893	0.135661	0.139571
10065					963.856	745.279	0.0737806	0.0449083	0.0699021	0.105875	0.0505864	0.0498671	0.0407628	0.0554295	0.0656482	0.0718473	0.041242	0.124604	0.126463	0.0691922	0.0864088	0.125695	0.0537437	0.0964793	0.0470851	0.0446647	0.0722092	0.059734	0.0348317	0.0346529	0.0477026	0.0543095	0.0378597	0.0461257	0.0525977	0.0956499	0.0031473	0.053706	0.0639104	0.0486039	0.0365813	0.0782063	0.0574813	0.040458	0.062151	0.128433	0.0533058	0.0544724	0.0662299
9011					883.77	745.197	2.04777	0.696466	1.13457	1.91109	0.852092	1.28007	0.663698	0.856195	1.17781	1.29225	0.860784	2.17106	2.43354	1.2981	1.0426	2.12727	0.943304	1.78104	0.789105	0.75578	1.30573	1.11048	0.574223	0.61822	0.963984	0.898617	0.619053	0.782622	0.85231	1.88542	0.626897	0.987893	1.03069	1.09208	0.540151	1.24721	0.828976	0.744847	1.08341	2.23887	0.84015	0.978305	1.06604
8492					855.81	744.375	0.034093	0.0384405	0.0481723	0.10153	0.0497856	0.0418256	0.0590059	0.0368502	0.0509817	0.0651324	0.0387288	0.15727	0.0864913	0.0668531	0.0416299	0.0756282	0.0318065	0.0676657	0.0376428	0.0354151	0.0582474	0.0740959	0.0295473	0.0418019	0.0449638	0.0354618	0.0348416	0.049692	0.0743745	0.111094	0.0330377	0.0689097	0.0672316	0.0537575	0.0222072	0.0805818	0.0533455	0.0654782	0.0507832	0.181253	0.037848	0.0605153	0.0604564
10037					961.805	738.956	0.102696	0.0878355	0.201328	0.109786	0.0531754	0.0572304	0.039393	0.0491042	0.10442	0.188013	0.106051	0.133912	0.0531491	0.0770057	0.035855	0.0124325	0.0439518	0.0439931	0.0685178	0.0429092	0.0805379	0.146658	0.041015	0.05805	0.124513	0.0446019	0.0576607	0.111559	0.0801176	0.174101	0.0479913	0.0772625	0.100015	0.127922	0.0646535	0.118544	0.0757116	0.0885263	0.0566346	0.0451226	0.0629461	0.0851802	0.0875765
10310					987.856	733.359	0.0934157	0.0874289	0.0866902	0.131401	0.0690632	0.0635499	0.0647391	0.06768	0.116345	0.172629	0.108906	0.118833	0.117714	0.115805	0.0715533	0.117952	0.0821572	0.127004	0.0840387	0.0639725	0.0980438	0.134415	0.0722061	0.0665642	0.089945	0.0988606	0.0817272	0.0862212	0.0895068	0.130654	0.059115	0.0717704	0.123862	0.0854774	0.0633101	0.101031	0.0871937	0.0904637	0.082214	0.136952	0.104964	0.0928227	0.0900013
10042					961.895	729.276	0.172928	0.0977353	0.163156	0.241808	0.0959126	0.121209	0.0965876	0.152324	0.234146	0.387993	0.234565	0.458069	0.420687	0.23662	0.228796	0.377873	0.204569	0.439467	0.180243	0.158435	0.235156	0.142836	0.0930914	0.0837709	0.132483	0.181153	0.0952672	0.102702	0.13807	0.208788	0.1167	0.118047	0.137987	0.148109	0.0882812	0.160113	0.121957	0.116653	0.226006	0.394734	0.227167	0.151696	0.195869
8487					855.741	728.072	1.96466	1.4004	1.99959	3.08506	1.39912	1.46147	1.51873	2.07883	2.59178	3.72068	1.95634	5.73613	6.76662	3.78786	3.50444	5.36266	2.08476	4.13293	1.96003	1.81335	2.91627	1.75071	1.28166	1.07895	2.04008	2.0172	1.02809	1.44486	1.89285	3.50796	1.50345	2.10159	1.87177	1.96836	1.18803	2.18393	1.68647	1.58939	3.13221	6.56423	2.20149	2.10166	2.41853
10259					981.864	725.88	0.184093	0.249718	0.278467	0.200331	0.108519	0.103648	0.118836	0.137187	0.19129	0.441613	0.289077	0.1419	0.231033	0.263546	0.0922259	0.08314	0.0937456	0.150989	0.141923	0.0920823	0.179668	0.244736	0.104832	0.14508	0.242064	0.112336	0.114416	0.285818	0.226933	0.282868	0.0825587	0.204279	0.298043	0.232469	0.219628	0.236667	0.187051	0.253718	0.141191	0.111153	0.127995	0.192692	0.181634
10020					959.792	724.452	0.143109	0.216069	0.227833	0.15981	0.11234	0.11185	0.120665	0.115415	0.156192	0.324379	0.269696	0.0962092	0.206022	0.199578	0.0916831	0.0599478	0.0914659	0.110939	0.124526	0.109403	0.152357	0.214596	0.103243	0.131141	0.188523	0.107813	0.11793	0.211562	0.182711	0.25777	0.0856358	0.163924	0.282579	0.196545	0.202155	0.201043	0.172173	0.211028	0.107268	0.0620144	0.115543	0.16576	0.154741
9186					893.755	722.635	0.1007	0.0858801	0.108788	0.149571	0.101209	0.090814	0.0620609	0.0934169	0.167052	0.252882	0.109356	0.243459	0.269002	0.147855	0.13121	0.343261	0.117462	0.258402	0.115467	0.0947861	0.152132	0.173489	0.0655372	0.0643589	0.0975697	0.134446	0.0766557	0.0608587	0.0764143	0.145566	0.0551167	0.0912514	0.113653	0.0786827	0.0627455	0.103444	0.104185	0.0806431	0.166932	0.287916	0.147009	0.109324	0.124843
8749					869.699	712.341	0.095762	0.0608685	0.0908474	0.164219	0.0655734	0.0655961	0.0822799	0.0899963	0.117458	0.0836197	0.0777387	0.205978	0.248969	0.140429	0.123873	0.18729	0.109393	0.205142	0.0853501	0.0781471	0.118927	0.0697757	0.0714703	0.0516966	0.0794436	0.0874209	0.0411289	0.0729253	0.091755	0.126894	0.0564057	0.099508	0.107529	0.0898992	0.0493983	0.111764	0.0834419	0.0892428	0.137138	0.25657	0.0997964	0.0936602	0.113863
9657					925.804	711.139	2.17892	2.92112	2.58223	4.12444	1.31169	1.42686	1.59282	1.60838	4.27202	5.04934	2.98603	2.75789	2.26495	2.92733	0.99737	2.29498	1.55223	2.87714	1.9349	1.54512	2.46029	2.8916	1.19988	2.00157	2.69662	1.35818	1.65159	3.07041	1.76413	4.9064	0.946403	2.46001	3.41646	3.44014	0.987717	3.62942	2.45337	2.44546	1.08356	3.06766	1.13667	2.33036	1.87213
9767					935.743	709.017	0.00487383	0.0411905	0.0166702	0.0108472	0.0136951	0.0220762	0.0387953	0.0128755	0.049076	0.0515293	0.0538578	0.0130507	0.0367669	0.0337018	0.0135031	0.00599296	0.00709706	0.0126665	0.0116063	0.0168641	0.0233368	0.048941	0.0273026	0.0766012	0.0115738	0.0117619	0.0100096	0.0575546	0.0267878	0.0361466	0.016936	0.0355911	0.0965809	0.0568081	0.0537949	0.0287099	0.0501259	0.0344845	0.0227616	0.00430757	0.0239554	0.0365367	0.0261087
9681					927.818	707.935	0.360736	0.428053	0.631525	1.02842	0.307827	0.325658	0.402665	0.283876	0.637489	0.821721	0.543445	0.807446	0.554401	0.410999	0.274429	0.440623	0.242277	0.63916	0.334839	0.292396	0.4884	0.633708	0.273453	0.318313	0.569882	0.315554	0.274122	0.547705	0.442979	1.04966	0.29695	0.579634	0.521209	0.875855	0.331483	0.56085	0.584342	0.646398	0.249846	0.616108	0.32007	0.500406	0.482701
8715					867.817	706.79	0.017024	0.0160167	0.00520853	0.0194732	0.00765304	0.0102483	0.0160765	0.0370735	0.0209628	0.0187543	0.00666562	0.0496935	0.0997178	0.032908	0.0388915	0.0337263	0.0130657	0.0502322	0.0145673	0.0204605	0.026421	0.0231665	0.0448827	0.0107921	0.0227027	0.0201367	0.0108777	0.0131254	0.0164386	0.0119799	0.0128337	0.0284249	0.0322965	0.0188965	0.0103325	0.0223042	0.0211449	0.0181216	0.0404017	0.153589	0.0138136	0.027313	0.0415323
10257					981.78	706.299	0.152151	0.298655	0.28804	0.176114	0.154556	0.156051	0.243291	0.198411	0.406091	0.689495	0.60964	0.197884	0.37926	0.327213	0.211137	0.0971514	0.148928	0.213006	0.19631	0.193875	0.266863	0.295956	0.194973	0.38065	0.293554	0.161786	0.186677	0.39731	0.290602	0.412944	0.152821	0.207047	0.544002	0.375075	0.35144	0.237487	0.224639	0.356446	0.19403	0.0586715	0.261849	0.278898	0.266786
10233					977.835	704.472	0.335404	0.486499	0.480571	0.504954	0.242332	0.274335	0.403696	0.268327	0.731271	1.19172	1.07011	0.452385	0.616048	0.409545	0.242482	0.287735	0.24377	0.373631	0.328232	0.264866	0.460396	0.694713	0.351527	0.457829	0.438262	0.272727	0.303727	0.553952	0.484804	0.761065	0.322884	0.450735	0.732838	0.601707	0.436013	0.463155	0.555468	0.542315	0.253385	0.328875	0.279473	0.464273	0.484632
8233					841.715	702.395	0.0103113	0.0122164	0.00804049	0.0104091	0.0073096	0.00739952	0.00421112	0.0254713	0.0142975	0.0150316	0.00668687	0.0202017	0.0353679	0.0166742	0.0138162	0.0283778	0.00928848	0.0196155	0.00818929	0.0141056	0.0143511	0.0118578	0.030164	0.00385506	0.00867726	0.00812908	0.00607112	0.00978063	0.00625118	0.0068722	0.00392562	0.00860244	0.00799293	0.00688431	0.00383137	0.00612032	0.00967558	0.00792755	0.0179194	0.032379	0.0103278	0.0103622	0.0119575
9744					933.729	701.077	0.00388867	0.0137607	0.0137586	0.000751395	0.00587567	0.0139765	0.0213471	0.0112342	0.0282614	0.0160958	0.024406	0.0741819	0.0132724	0.0144826	0.00527611	0.00687698	0.00628082	0.00437912	0.00864242	0.00387556	0.0145312	0.0340847	0.0157704	0.0389003	0.00779296	0.00983351	0.0115944	0.0309341	0.0222108	0.0339824	0.0124124	0.0325092	0.0355134	0.0333027	0.0213494	0.0290042	0.0362329	0.020601	0.0109119	0.00439193	0.0194062	0.0230369	0.0225482
9253					897.77	691.223	0.876156	1.04943	1.36219	2.45973	0.932412	0.885649	1.08254	0.639657	1.71498	4.87712	1.53094	1.31155	1.37319	1.05233	0.549293	1.0911	0.585665	1.48947	0.770975	0.678885	1.31566	1.41571	0.746973	0.782356	1.0864	0.796535	0.58985	1.34021	1.19291	3.00108	0.647644	1.5834	1.47814	2.47176	0.731147	2.18818	2.19284	2.21712	0.552185	1.9841	0.635547	1.3817	1.18936
7426					801.682	689.11	0.0227755	0.0511528	0.0270099	0.0377234	0.039349	0.0307657	0.043199	0.0908973	0.0555599	0.0913801	0.0593506	0.0503575	0.110352	0.0933314	0.0480497	0.672306	0.0283168	0.0727129	0.033156	0.0685259	0.0863136	0.713443	0.0854817	0.897018	0.0461857	0.0382255	0.0289995	0.0493904	0.0443476	0.0396821	0.0462185	0.0435154	0.0723818	0.0412599	0.0404627	0.0245782	0.062898	0.0542193	0.0815316	0.0938732	0.0328044	0.126826	0.0720468
9967					953.75	688.356	0.375816	0.78798	0.584421	0.584234	0.334965	0.321543	0.48145	0.432316	0.947032	1.47357	1.19599	0.529131	0.843199	0.792944	0.366719	0.435065	0.31032	0.455991	0.407546	0.359182	0.600971	1.0457	0.478297	0.896197	0.644758	0.399266	0.409971	0.683466	0.614224	0.987665	0.336788	0.605362	0.948714	0.694792	0.823755	0.677721	0.759352	0.874648	0.458994	0.399998	0.518836	0.662925	0.552708
10208					975.816	686.909	0.208086	0.41791	0.265502	0.345419	0.147514	0.163622	0.308505	0.315006	0.825825	1.36032	1.22784	0.457094	1.00874	0.587702	0.163527	0.241892	0.192492	0.38896	0.194138	0.224951	0.452253	0.468674	0.311675	0.395785	0.40587	0.241159	0.196535	0.626484	0.290336	0.565094	0.21545	0.409143	0.82324	0.507099	0.713216	0.369706	0.629857	0.662671	0.333791	0.279175	0.263938	0.435445	0.481113
10677					1027.77	681.684	0.0162184	0.122803	0.0664825	0.0169315	0.0357128	0.0240567	0.116496	0.0826836	0.188474	0.297719	0.286833	0.0332368	0.233768	0.151214	0.0694633	0.0269486	0.0476581	0.0920362	0.044135	0.0598762	0.100637	0.0820777	0.0627541	0.174856	0.0948452	0.0433527	0.04136	0.11356	0.0638277	0.0702469	0.0575433	0.0524802	0.214148	0.156125	0.236123	0.0751576	0.102476	0.0928647	0.0747788	0.0105145	0.0470691	0.0933081	0.093387
8871					875.707	680.771	0.669021	0.468223	0.615588	0.926238	0.353162	0.333778	0.439495	0.40514	0.851178	1.6268	0.572806	1.35826	0.934533	0.772247	0.678587	1.27303	0.685537	1.94547	0.609435	0.440227	0.797937	0.397446	0.233203	0.120051	0.306593	0.570732	0.29975	0.251529	0.60626	0.667268	0.22994	0.302581	0.390653	0.487209	0.306883	0.503773	0.347207	0.468053	0.816134	2.33471	0.70217	0.517107	0.566717
10437					999.819	678.335	0.0541798	0.197832	0.128928	0.0960973	0.0663595	0.0527229	0.136397	0.0926244	0.404713	0.532347	0.586759	0.28423	0.326311	0.186491	0.101954	0.0885638	0.0722763	0.116135	0.0965798	0.0862546	0.185388	0.168918	0.115513	0.273071	0.149658	0.0762164	0.0927489	0.216056	0.147914	0.245697	0.0959046	0.175276	0.188814	0.265457	0.299549	0.152615	0.20761	0.219997	0.10731	0.0752716	0.131424	0.170251	0.184792
7911					825.683	673.744	0.0135264	0.00703641	0.00508542	0.0154728	0.00415125	0.0055782	0.00812386	0.0183274	0.0196759	0.0194627	0.00310115	0.0462902	0.0573881	0.0266723	0.0178739	0.031857	0.0151781	0.0494162	0.00817859	0.00786519	0.0190131	0.00978655	0.0122838	0.000356613	0.0159436	0.0153361	0.00434902	0.0072971	0.0123081	0.0118477	0.00460484	0.00891294	0.0070989	0.00825744	0.00183014	0.0150346	0.00999182	0.0104103	0.0344685	0.0908897	0.00667523	0.0143842	0.021515
7392					799.668	671.131	0.00130581	0.00122671	0.00111204	0.00479345	3.72341e-05	0.0180314	0.00206247	0.0116448	0.00534032	0.0129188	0.00321937	0.0184554	0.0428232	0.0128463	0.00355348	0.0165616	0.0175796	0.0229825	0.00148287	0.0107555	0.0104366	0.00640808	0.0215794	0.00152729	0.0050395	0.00642912	0.000417288	0.00348687	0.00297517	0.00535509	0.00145136	0.00439343	0.00561927	0.00366945	3.80742e-05	0.00199154	0.00471878	0.00188508	0.0154558	0.0622238	0.00190812	0.00782863	0.0144699
9902					947.783	667.368	0.0376577	0.0798283	0.0543881	0.0626029	0.0236284	0.0328164	0.0463351	0.0321069	0.192609	0.173731	0.186728	0.154087	0.0969899	0.0745481	0.0317061	0.0825385	0.0298154	0.0625067	0.0336918	0.0251241	0.075672	0.184894	0.0453486	0.0783577	0.0484411	0.0399492	0.0573553	0.0982513	0.0661288	0.204718	0.0314875	0.096608	0.0873351	0.125877	0.0653789	0.0667048	0.107047	0.0991176	0.0850844	0.056294	0.13863	0.0891504	0.0762411
8643					863.691	666.487	0.151792	0.572308	0.551329	0.502582	0.489954	0.59741	0.670395	0.486469	0.960701	0.792235	0.64715	0.494043	0.47986	0.78121	0.449643	0.693663	0.427416	0.375255	0.594581	0.770568	0.574428	0.891379	0.37926	0.712431	0.348179	0.472174	0.348496	0.832014	0.670181	0.688379	0.765353	0.716995	1.15102	0.840168	0.559562	0.538034	1.04423	1.06468	0.53616	0.343615	0.406538	0.665443	0.589041
9964					953.658	666.316	0.047313	0.0105298	0.00620805	0.0121653	0.00973628	0.0203789	0.0183446	0.00847466	0.0262307	0.00662718	0.0082486	0.00831908	0.0107225	0.00970255	0.00645273	0.0174766	0.0063724	0.0068798	0.013272	0.0105699	0.0132012	0.0194324	0.00733368	0.0190372	0.00513885	0.0086966	0.00667946	0.0126507	0.00825175	0.0206071	0.0252844	0.0142536	0.0341742	0.0208324	0.00683591	0.00636115	0.031509	0.0173369	0.0144661	0.0070446	0.00780061	0.0146863	0.0113177
9945					951.795	666.252	0.040478	0.121775	0.123644	0.0978684	0.133016	0.13193	0.172342	0.118776	0.203271	0.101594	0.0884176	0.117875	0.105763	0.162237	0.122125	0.171285	0.117061	0.0840683	0.151161	0.173664	0.126918	0.190261	0.09465	0.166673	0.080734	0.125475	0.0979043	0.177131	0.150914	0.148099	0.189211	0.18346	0.28458	0.147485	0.110392	0.133789	0.196195	0.196	0.123093	0.0981742	0.0968494	0.149554	0.12911
9254					897.693	662.085	0.033092	0.0506585	0.0372707	0.0555271	0.0104749	0.0153386	0.0263214	0.0238589	0.0759893	0.0598404	0.0693855	0.106502	0.072985	0.0667349	0.0229776	0.0381565	0.0383946	0.0649588	0.0151799	0.016492	0.0450069	0.0620871	0.0194001	0.0250834	0.0427647	0.0249789	0.0265455	0.0600538	0.0455687	0.0999956	0.00495655	0.0651678	0.046291	0.101104	0.0249083	0.070172	0.077589	0.0658756	0.0604258	0.0968905	0.0322589	0.0526059	0.0540243
8875					875.696	661.712	0.0230243	0.0119871	0.00765447	0.012902	0.00468596	0.00194125	0.00247254	0.00563998	0.0160128	0.0259061	0.0111305	0.0305182	0.0116769	0.0185988	0.00527484	0.0197131	0.012833	0.0612923	0.00549384	0.0061792	0.0147469	0.00875746	0.00583114	0.0013423	0.00434914	0.00423963	0.0037913	0.00362764	0.00878978	0.00664155	0.00546348	0.004269	0.00424402	0.00822615	0.00622807	0.00534528	0.0113259	0.00418234	0.0122188	0.0747116	0.00713864	0.00953617	0.00679171
10203					975.729	660.918	0.0338955	0.112581	0.0608114	0.0445558	0.037599	0.0416315	0.0620243	0.0686196	0.217223	0.241157	0.304092	0.0572226	0.0987465	0.0989134	0.0347476	0.0480536	0.0376578	0.0526584	0.0498989	0.0476074	0.0874848	0.105261	0.0651731	0.159178	0.0607143	0.0458347	0.0598243	0.114969	0.0825871	0.105379	0.0579169	0.103512	0.138333	0.159936	0.120247	0.0775705	0.178982	0.133838	0.0526426	0.0349212	0.051854	0.0954337	0.0873174
8263					843.731	651.375	0.477547	1.372	0.576911	1.53973	1.59575	1.53117	0.978479	1.3006	1.53066	1.68232	1.52808	1.02548	1.38108	2.15833	1.55782	1.34353	1.90908	1.14254	0.750428	1.97435	1.36779	1.77285	1.58788	0.828521	1.33869	1.39503	1.74504	1.70942	2.01075	1.29199	1.61498	1.45098	2.32948	1.48095	1.44867	1.55181	2.30451	1.81093	1.49582	1.04682	0.951338	1.55832	1.48373
8639					863.697	611.207	0.062931	0.385467	0.164808	0.337934	0.213943	0.284673	0.214301	0.251904	0.319814	0.237252	0.178732	0.172552	0.225326	0.260106	0.24572	0.251917	0.3392	0.179831	0.210075	0.429064	0.248278	0.408579	0.208716	0.196887	0.251491	0.23697	0.265349	0.413251	0.33271	0.264656	0.212891	0.222819	0.522586	0.365242	0.303047	0.259341	0.453256	0.425977	0.323455	0.11877	0.223279	0.300464	0.224143
7709					815.7	597.507	13.5157	70.4902	39.8577	54.7612	58.5682	62.6608	56.9236	81.2179	69.9145	86.8294	87.6348	39.3218	71.3514	111.843	60.0836	66.2671	62.8667	45.5413	53.1371	109.531	65.1159	85.4568	59.5406	72.8746	56.4996	61.7312	49.93	75.197	105.218	51.0564	85.2377	60.5173	108.029	94.0148	86.2413	57.1844	90.8403	89.6409	77.548	27.7371	53.8783	72.4186	71.3264
8261					843.719	595.968	0.0468405	0.217482	0.119765	0.256485	0.167103	0.145108	0.19316	0.194336	0.314738	0.197308	0.201805	0.15509	0.13202	0.23291	0.198933	0.172648	0.192132	0.178048	0.131506	0.230445	0.183893	0.210958	0.175366	0.140032	0.171036	0.190814	0.186453	0.201495	0.171714	0.176767	0.206838	0.187878	0.184383	0.322406	0.194233	0.140009	0.331672	0.233122	0.174129	0.0799906	0.143989	0.191164	0.193772
8232					841.714	595.807	0.32632	1.37743	0.797868	1.43316	0.858717	0.974671	0.903705	1.25023	1.99629	1.1671	1.25712	0.872619	0.995175	1.48178	1.22322	1.19574	1.167	1.01089	0.78325	1.51926	1.12958	1.41527	1.04153	0.813948	0.900433	1.26376	1.00673	1.22034	1.02844	0.960516	1.16508	1.10532	1.20629	2.12383	1.19264	0.764585	2.33593	1.39967	1.01049	0.496013	0.826125	1.16385	1.16946
8636					863.697	594.67	0.138319	0.53559	0.422251	0.642826	0.355854	0.434163	0.417315	0.490638	0.759974	0.412655	0.345406	0.465438	0.373066	0.479532	0.584706	0.458831	0.510948	0.408219	0.396687	0.477357	0.455489	0.504191	0.451506	0.328021	0.384445	0.484631	0.476945	0.432825	0.261607	0.433907	0.472886	0.465	0.480846	0.690982	0.423965	0.365426	0.725744	0.449009	0.35941	0.249923	0.375086	0.440818	0.342629
8414					851.687	593.605	0.00157533	0.0301542	0.0143714	0.0402413	0.00652967	0.0120933	0.00792079	0.0123366	0.0328909	0.0114685	0.0113815	0.00762151	0.00845313	0.0346972	0.00919964	0.00815801	0.0230786	0.0165152	0.0104046	0.0162015	0.0157646	0.0280705	0.0134911	0.0154672	0.0276936	0.00737796	0.0231478	0.0248433	0.0132642	0.021245	0.0317195	0.0170999	0.0234281	0.0531122	0.0109605	0.00932528	0.0506886	0.0219044	0.0176102	0.00614526	0.00998455	0.021329	0.0202844
8111					835.664	582.828	0.415967	1.53229	1.19654	1.59031	1.32039	1.21018	1.35156	1.60999	1.76985	1.47711	1.41105	0.986744	1.38216	1.45814	1.35419	1.4087	1.28798	1.19259	1.26318	2.11399	1.36664	1.74666	1.07491	1.69175	1.18082	1.25126	1.17189	1.45606	1.62167	1.41193	1.51023	1.37645	2.8008	2.2142	1.61656	1.10099	2.30868	1.6205	1.45877	0.727882	1.13944	1.52407	1.32137
7432					801.682	580.17	2.12249	10.0434	5.44559	9.59957	10.132	9.38713	9.37941	13.0913	13.0373	12.2126	13.7836	6.14711	10.3528	16.4733	7.98816	11.4664	7.42696	5.9471	9.16247	16.7095	9.99541	16.8663	9.49875	11.5403	8.32663	8.51262	6.62317	11.0565	13.4381	8.10828	12.5987	9.83126	16.5989	12.0345	10.0248	7.53034	16.4476	13.7215	14.5697	4.58997	5.33114	10.8625	10.1844
8150					837.673	562.851	0.507421	1.67586	1.29372	1.53228	1.37181	1.47952	1.52581	1.98759	1.98797	1.6663	1.90871	1.06336	1.59672	1.92814	1.58922	1.7229	1.54002	1.25304	1.49769	2.37013	1.57491	2.07545	1.2884	1.80786	1.21648	1.53445	1.16228	1.61614	1.94979	1.40233	1.8792	1.39062	2.95935	2.44063	1.78073	1.20959	2.70299	2.33711	1.57216	0.740247	1.08821	1.7077	1.61358
8105					835.665	562.701	3.45609	12.0927	8.42865	10.7567	9.67767	10.1904	10.1705	13.6245	13.8652	11.3115	13.1331	7.27199	11.1807	12.9432	10.2124	11.4935	10.4045	8.70107	10.3888	16.3585	10.7831	14.9401	8.59214	12.3342	9.01254	10.3992	7.98119	11.2014	13.3236	9.62362	12.6479	9.76478	21.4358	12.4326	11.9591	8.46976	18.5907	14.2898	11.1746	4.82372	8.31624	11.5657	10.4142
7714					815.69	562.423	0.857556	3.00438	2.17344	2.86822	2.29492	2.5066	2.58354	3.54806	3.85482	3.09094	3.85051	1.93121	3.09557	3.8035	2.7167	2.95382	2.60158	1.4886	2.62418	5.06153	2.84548	4.32432	2.25502	3.66371	2.08445	2.62946	1.92797	3.14427	4.20609	2.42667	3.76733	2.35477	5.80383	4.65432	3.0312	2.17455	5.63878	4.06838	3.03922	1.22722	2.0958	3.22587	3.20814
8637					863.687	560.409	0.00830667	0.102215	0.06694	0.120781	0.0631919	0.0959846	0.0964663	0.0852667	0.0733647	0.106796	0.105993	0.0382592	0.0627842	0.126296	0.106794	0.0795091	0.109666	0.0551907	0.0914829	0.120943	0.0858116	0.145923	0.06967	0.0515149	0.0706308	0.0761562	0.0883079	0.0959695	0.0826288	0.0628006	0.100437	0.07475	0.153654	0.0982795	0.109519	0.0722138	0.175135	0.142671	0.0947133	0.0270807	0.0686152	0.0930336	0.0796237
8193					839.7	559.017	0.258229	1.54574	0.963482	1.77838	1.04956	1.54481	1.37359	0.702273	1.28218	1.81191	1.71368	0.712713	1.04052	2.19732	1.63469	1.2369	1.4512	0.96084	1.43081	1.97873	1.33338	2.28012	1.21719	1.06716	1.15854	1.25983	1.23433	1.51323	1.77249	1.01842	1.66623	1.18882	2.21011	1.65286	1.58635	1.09636	3.14532	2.42243	1.51183	0.568247	1.24395	1.54069	1.42098
8227					841.706	558.778	0.0343587	0.237557	0.142579	0.255746	0.169668	0.283094	0.220153	0.208042	0.177178	0.267544	0.277589	0.107335	0.170755	0.403157	0.2505	0.193564	0.279082	0.130965	0.217464	0.323213	0.217477	0.322882	0.182795	0.149708	0.166944	0.184208	0.181551	0.0309697	0.27977	0.143777	0.258443	0.181216	0.344631	0.247033	0.267857	0.164502	0.528062	0.374541	0.246802	0.0777097	0.173978	0.225369	0.22179
8896					877.635	553.279	0.989971	1.82296	1.33813	1.77263	2.11567	1.98469	1.8273	1.93236	2.22244	2.23943	1.89799	1.54582	1.83141	2.34646	1.76236	1.72001	2.00133	1.64862	1.87898	1.70442	1.82915	2.35504	1.90636	2.17312	1.91012	1.98444	2.09991	2.03669	2.19658	2.1025	1.99475	2.07303	3.43661	1.86626	1.93197	1.97275	2.06644	2.11005	2.24234	1.46474	1.46321	2.06934	1.73158
7908					825.623	552.332	0.223284	0.553659	0.350612	0.499015	0.539559	0.591882	0.526469	0.586168	0.555752	0.661193	0.639452	0.421572	0.545867	0.849645	0.551768	0.481471	0.524697	0.420773	0.482756	0.552524	0.527906	0.761403	0.621905	0.378254	0.615445	0.62333	0.547093	0.620084	0.613595	0.2316	0.551094	0.634396	0.860307	0.366437	0.54546	0.62245	0.608639	0.652212	0.692601	0.384671	0.528326	0.572965	0.51208
7579					809.648	551.702	8.89501	23.6485	14.0968	21.4872	24.1098	23.6965	21.5725	22.9701	27.2796	28.5283	26.3647	17.1259	23.3847	30.9943	22.6941	21.1262	24.9596	20.9321	21.2074	24.17	22.4622	31.7972	25.2179	24.058	24.5473	25.2621	22.0712	25.6514	29.0433	23.9633	24.863	25.2721	37.6084	22.8602	22.328	22.7652	29.7501	30.0815	28.0133	15.5796	20.1922	25.5463	20.6782
7663					813.683	549.509	13.197	53.37	50.6626	45.9991	27.3322	32.4926	36.1308	57.7257	77.4445	51.9279	48.5147	28.8234	35.981	53.4623	43.8793	43.672	33.7075	42.8128	36.8406	63.359	43.8667	43.6386	38.4417	37.5399	32.3065	43.3573	27.7477	31.9349	35.1522	38.1624	53.9781	37.1016	41.758	92.8252	56.7495	26.0344	57.8582	44.1232	37.0444	19.5744	34.5698	41.4949	43.3173
8107					835.665	549.444	6.80818	16.6688	18.4011	15.4986	10.1241	10.6438	12.7066	17.5172	20.1816	16.0989	15.2245	11.0093	13.9685	17.5643	16.176	14.9869	11.1845	16.5286	12.7936	17.6631	14.5874	13.9126	13.4492	11.5373	11.2675	14.6604	10.4198	10.0591	0.283725	13.4578	17.6011	11.8609	16.0484	23.591	18.0615	9.65102	15.3893	11.8225	12.6864	8.18448	13.7971	12.8871	13.2987
9344					903.653	548.412	0.651813	1.07824	1.33326	1.01051	0.694905	0.819594	0.879046	1.11133	1.26436	0.943834	0.855673	0.918092	0.900428	0.848134	1.06659	0.965191	0.77902	1.10159	0.935672	0.904474	0.953089	0.77129	0.770736	0.727642	0.766319	0.858154	0.751043	0.660258	0.665955	0.959828	0.927276	0.812706	0.998828	1.4	1.16529	0.69738	0.909386	0.790491	0.731449	0.636138	0.931079	0.846562	0.799929
8374					849.704	542.501	0.0376493	0.192034	0.102984	0.141448	0.18928	0.146841	0.143859	0.173755	0.161489	0.184966	0.226792	0.101589	0.234889	0.316401	0.145313	0.172163	0.147769	0.104462	0.103284	0.40697	0.171697	0.230781	0.109378	0.24762	0.148519	0.158805	0.170507	0.190171	0.35954	0.147738	0.189708	0.171062	0.35382	0.268782	0.268895	0.147007	0.173968	0.175543	0.203646	0.0610234	0.128768	0.195264	0.176259
7425					801.675	540.425	0.0218809	0.199092	0.0380018	0.194808	0.328785	0.268618	0.345127	0.283667	0.234311	0.247149	0.295506	0.183107	0.180062	0.325625	0.178866	0.27089	0.137984	0.24645	0.224083	0.360408	0.228221	0.55953	0.164001	0.431015	0.132085	0.383482	0.159063	0.0582272	0.424906	0.212327	0.404605	0.17345	0.632258	0.351116	0.382483	0.112534	0.396389	0.306923	0.309982	0.203943	0.161923	0.298012	0.22495
7899					825.65	535.926	0.0876633	0.120722	0.139539	0.175687	0.105723	0.18941	0.121213	0.193034	0.208882	0.33062	0.304267	0.0887142	0.10185	0.146581	0.188037	0.160384	0.209484	0.161508	0.213864	0.220389	0.173379	0.293033	0.0784273	0.0645901	0.091912	0.1619	0.187644	0.134195	0.235892	0.234871	0.334925	0.0950096	0.205561	0.114933	0.0986028	0.117404	0.333251	0.356612	0.168335	0.118689	0.189368	0.180758	0.153948
6917					773.651	534.534	0.493348	1.44536	0.771221	1.38106	1.38439	1.57027	1.29523	1.72677	2.09091	1.47474	1.67576	1.23701	1.59994	2.30219	1.26743	1.93129	1.1847	0.862667	1.32234	1.67627	1.43464	3.16447	1.34335	1.76258	1.20886	1.61103	1.18546	1.55918	2.0349	1.44969	1.36956	1.38529	2.81374	1.60144	1.48353	1.35729	2.29012	2.14113	1.78863	0.93581	0.896611	1.66913	1.5299
7828					821.649	530.229	0.121857	0.329281	0.00998	0.329267	0.2062	0.235898	0.191022	0.0192807	0.454759	0.304154	0.333723	0.0123172	0.298998	0.358327	0.00490648	0.0102333	0.157064	0.204253	0.24152	0.291079	0.205706	0.476449	0.279234	0.232811	0.231332	0.341757	0.250747	0.220608	0.202824	0.238536	0.257797	0.246125	0.351403	0.613815	0.276895	0.164824	0.0144613	0.330703	0.206673	0.108936	0.179175	0.261255	0.250456
8897					877.586	527.555	0.000777759	0.00317474	0.00257457	0.0228583	0.00357942	0.00889944	0.00283303	0.00500597	0.00447194	0.00623474	0.00561963	0.00439301	0.00199321	0.0142478	0.00469905	0.00314103	0.00342917	0.00420585	0.00971994	0.00768965	0.00597741	0.00714769	0.000908074	0.00905533	0.00321073	0.0103939	0.00552342	0.011444	0.0129501	0.0070266	0.00791383	0.0103904	0.00974783	0.00495663	0.00293097	0.00544088	0.0137663	0.0215038	0.00182938	0.00682157	0.00663036	0.00797959	0.00552306
7900					825.586	520.529	0.0915154	0.199998	0.193175	0.211289	0.173432	0.203235	0.171521	0.292858	0.157353	0.255408	0.229827	0.11835	0.200072	0.266535	0.182859	0.162266	0.277585	0.129664	0.285103	0.249855	0.202595	0.326339	0.082643	0.125519	0.183764	0.180625	0.120339	0.24339	0.253056	0.278589	0.229123	0.237736	0.449588	0.231673	0.171791	0.191885	0.376015	0.269703	0.21889	0.0934372	0.166222	0.221516	0.200398
7543					807.635	514.364	1.23693	3.54	3.45767	3.06979	4.13959	3.6864	4.03958	5.21889	4.54713	3.78821	3.84583	3.31873	4.03433	5.12498	3.17979	4.39603	3.60957	3.01514	3.8681	5.59841	3.83576	4.68764	3.08051	4.0208	3.47259	3.5434	2.78881	3.96044	5.59591	3.65173	3.33237	4.12558	8.0201	4.84755	3.87018	3.92045	5.10153	4.45538	4.1688	3.19162	2.89991	4.13676	3.38392
7135					785.651	513.564	3.044	10.8867	8.77164	10.0022	10.9261	10.558	10.8648	15.7484	16.0764	11.3793	12.0551	8.08611	10.8365	15.3509	8.35549	12.0726	9.76101	9.05484	10.697	16.4517	11.0489	16.7082	8.69328	15.647	9.41299	12.0918	7.59632	11.4007	15.6733	11.3898	11.0188	10.7954	24.7869	17.7163	10.9853	9.54096	18.9857	16.4257	12.7126	8.02592	7.19472	12.8401	10.5509
8060					833.649	513.264	2.33051	9.05817	7.73711	9.06138	6.79377	8.24611	8.10257	8.92363	9.2011	10.8424	10.2512	5.29693	7.19546	10.0801	9.67139	7.9802	7.30494	6.88209	8.25141	9.2696	8.124	9.073	6.90707	7.44251	7.06702	7.54356	7.01175	6.87253	9.78831	6.68055	8.36486	8.26098	13.2891	10.2088	9.43293	6.23947	12.3031	10.9329	7.55512	4.70392	7.27011	8.34738	7.26907
8108					835.654	513.197	0.341095	1.25342	1.14267	1.52858	0.974795	1.18066	1.12718	1.30423	1.21649	1.37122	1.6085	0.747413	1.12161	1.40789	1.38247	1.1315	1.11706	1.03741	1.13734	1.30042	1.1716	1.29124	1.06126	1.15386	1.08341	1.10328	0.913549	1.08741	1.24303	1.01367	1.29254	1.05925	1.84958	1.57183	1.33041	0.964079	1.54866	1.7126	1.13151	0.717824	1.02259	1.20758	1.08718
7665					813.673	512.622	0.756212	3.81512	2.80508	3.8524	2.59935	3.16508	3.15534	3.59913	4.13349	4.09381	4.24284	1.75775	2.60177	4.70083	3.33203	3.43031	2.87594	2.75866	3.27192	4.84299	3.2895	4.37772	2.59845	3.53086	2.57612	3.61505	2.53499	3.08276	3.93266	2.76962	4.51976	3.01054	5.16279	4.72941	3.74136	2.27692	6.16424	4.3185	3.26666	1.49461	2.31679	3.50099	3.24087
7703					815.678	511.23	0.00482089	0.0260409	0.0177484	0.0384732	0.0200958	0.0360078	0.0308129	0.0259906	0.0316049	0.0323898	0.0316315	0.00428013	0.0123604	0.0506252	0.0202145	0.0283327	0.0230134	0.0123476	0.0283187	0.034031	0.025457	0.0229047	0.020212	0.0193085	0.00839607	0.0122504	0.019323	0.0239205	0.0463244	0.0197624	0.0503388	0.0228746	0.0295501	0.0522184	0.0339092	0.0160668	0.0639571	0.0417654	0.0324899	0.00190508	0.0182313	0.0277854	0.0218988
6686					759.638	507.418	3.80229	12.296	8.22	16.1601	10.5336	12.7323	10.9665	10.3843	18.2605	15.2562	11.1919	9.79671	7.71548	20.1928	9.77422	9.65476	11.5687	9.25102	9.79908	12.8869	11.5222	27.2189	11.9084	11.6477	12.9786	12.1815	11.0923	13.3668	14.3531	14.8168	10.1874	12.6387	24.3646	13.8624	11.3953	12.7161	22.4268	22.4004	12.7508	9.25375	8.48035	14.502	13.1949
7397					799.63	503.716	0.0147808	0.0473532	0.0407887	0.0478869	0.107212	0.0980569	0.148181	0.0941366	0.128533	0.120865	0.115494	0.0552618	0.0768799	0.108657	0.0856257	0.0862	0.0850177	0.097255	0.113094	0.133436	0.0902357	0.117816	0.0695489	0.290168	0.0388864	0.0900588	0.0309107	0.106646	0.141144	0.143525	0.137717	0.0695038	0.212833	0.122555	0.0712661	0.0696316	0.258964	0.151049	0.159715	0.0410917	0.0464283	0.118473	0.107449
7706					815.624	490.421	0.17395	0.891886	0.396318	0.814676	0.660199	0.437435	0.806402	0.582916	0.874371	0.741212	0.806661	0.456931	0.817415	0.879563	0.572621	0.658873	0.754169	0.743645	0.607985	0.800312	0.673877	1.30934	0.524627	0.651882	0.899991	0.906861	0.687462	1.05253	0.958196	0.892194	0.67591	0.707665	1.50244	0.864994	1.03627	0.875823	1.41602	1.23429	1.23258	0.495578	0.728627	0.932664	0.760606
7355					797.587	489.538	0.427105	1.28924	1.36192	1.61317	1.01305	1.49845	1.51111	1.66645	1.38624	1.42236	1.64307	0.907372	1.43816	2.20981	1.48719	1.28213	1.57373	1.28908	1.74014	1.55435	1.41571	1.62583	0.777257	1.36148	1.07336	1.79462	0.949408	1.61589	1.51272	1.86177	1.9723	1.33884	3.00908	1.85181	1.9251	1.07207	1.94509	1.79097	1.59872	0.796467	0.93391	1.54033	1.34177
6513					749.587	487.612	0.299775	1.77081	1.21142	1.48734	1.78457	2.8401	1.79017	1.80709	2.06234	1.49318	2.75474	1.39156	1.70544	2.30923	2.21031	2.82973	1.45107	1.62549	1.62249	1.78462	1.81157	3.14339	1.26171	2.45805	1.43795	3.6131	2.78324	1.55834	2.9509	1.73586	2.18408	1.56879	3.71755	3.19205	3.16154	2.11002	3.33088	1.85933	2.62125	1.3537	2.09856	2.40701	1.70403
6252					731.605	482.64	0.129849	0.512335	0.384483	0.777886	0.569948	0.591325	2.81809	0.485303	0.901889	0.656337	0.404118	0.562316	0.374423	0.719056	0.433629	0.439821	0.633015	0.468388	0.445819	0.540419	0.642423	0.810643	0.589541	0.515144	0.567084	0.488392	3.23655	0.528506	0.569624	3.56767	0.450525	0.558106	1.26932	0.500793	0.459668	0.62015	1.07239	0.733285	0.606807	0.494635	0.47389	0.905636	0.44968
6915					773.579	477.346	0.0636546	0.428451	0.194783	0.341082	0.3559	0.210269	0.352598	0.309427	0.397804	0.320061	0.300339	0.211808	0.378611	0.619455	0.314348	0.289919	0.314341	0.252615	0.298236	0.417118	0.318541	0.422609	0.26863	0.261163	0.325882	0.363408	0.31744	0.458506	0.44378	0.35584	0.290623	0.381502	0.654664	0.388313	0.451399	0.347381	0.475315	0.563828	0.42291	0.13806	0.395145	0.38632	0.346085
7301					795.571	476.306	0.416694	1.12824	1.41267	1.47969	1.10702	1.44311	2.38335	1.83714	1.35189	1.82472	1.69312	0.674822	2.43741	2.37047	2.08583	1.19991	1.98148	1.84793	1.55081	2.33359	1.62799	1.38676	1.05204	1.13846	1.06232	1.25906	1.19784	1.85143	1.73487	1.8785	2.90733	0.993435	3.85402	1.76682	2.16311	1.30748	2.09072	2.24891	1.67294	0.697418	0.898488	1.6581	1.58876
6657					757.553	472.8	0.915182	1.2742	1.30854	1.20977	1.22399	1.25377	1.22016	1.55208	0.990044	1.00182	1.09559	1.25586	1.63023	0.998856	1.46258	1.18772	1.23433	1.28307	1.21379	1.11363	1.22126	0.66129	1.20698	1.14608	1.26784	1.01356	1.13687	1.11333	1.17072	0.921013	1.11731	1.18123	2.62031	1.12669	1.33176	1.09305	0.900374	0.898892	1.07918	1.16286	1.33379	1.17416	1.00367
6869					771.597	465.318	0.289639	0.603481	0.234751	0.230896	0.47568	0.47167	0.652753	0.474002	0.475929	1.02512	0.8286	1.0467	0.304786	0.640106	0.634282	0.442003	0.287924	0.547216	0.482591	0.438441	0.529328	0.603565	0.531916	0.462568	0.943529	1.12186	0.423145	0.217917	0.321283	1.37866	0.497028	0.284746	0.608279	0.202495	0.303224	0.412289	1.17896	0.932083	0.771945	0.371174	0.152806	0.585974	0.47346
6655					757.552	457.058	3.62132	4.86523	4.69327	4.0918	4.03469	3.49291	4.40869	5.37345	3.2107	3.39322	4.21342	4.87913	5.63225	4.0809	4.94075	4.47733	4.69568	4.55908	4.77422	3.32737	4.33827	3.90695	4.24438	4.49589	4.62021	3.8062	4.27351	4.26184	4.82302	3.70944	3.84578	4.21944	8.1761	4.5426	5.06431	4.3723	3.27344	2.74691	4.55999	4.21157	5.3403	4.42471	3.80316
7351					797.614	454.43	0.171416	0.501344	0.454271	0.371876	0.42779	0.390042	0.665355	0.651692	0.700225	0.727576	0.567459	0.307505	0.374756	0.546495	0.569966	0.351173	0.355798	0.502524	0.525178	0.668565	0.49155	0.437983	0.452162	0.746768	0.282306	0.472414	0.345403	0.513785	0.524283	0.475673	0.65047	0.478376	0.784275	0.72389	0.517696	0.378793	0.872845	0.657473	0.710645	0.230441	0.531633	0.539366	0.486853
7308					795.6	453.483	3.53718	11.6722	9.36888	8.11617	10.485	9.80176	13.7537	13.4437	14.826	16.1731	12.3641	6.85664	8.47593	12.6318	12.4833	8.78141	8.29533	10.8105	11.7364	14.1452	10.8879	10.9948	9.97105	16.8656	6.09788	11.1448	8.15854	11.4133	10.8755	10.3719	14.0489	10.4586	18.6354	16.5404	11.4281	8.35028	18.7472	14.2823	14.6092	5.55652	11.1802	11.9865	10.8254
6914					773.588	451.512	0.680533	2.51134	1.58746	2.3995	2.6367	2.8042	1.77169	1.97754	2.33992	3.0537	2.27985	1.3335	1.75121	2.801	2.26577	4.66375	1.58648	1.2696	2.48327	1.96015	2.20786	6.21629	1.66613	2.50403	1.64367	2.80911	2.51459	1.46845	2.31992	2.21028	1.9839	2.16321	3.32293	1.91031	1.99234	2.26101	4.73249	3.1762	2.83924	1.35713	2.06015	2.55757	2.40907
7107					783.571	447.336	0.763097	2.44057	1.8611	2.38644	2.37339	3.17914	2.35657	2.57648	3.76649	2.87625	14.1631	2.16306	2.15154	2.6902	17.1124	2.6879	2.24813	2.15518	2.20524	3.11432	3.76353	2.59493	2.25344	2.78365	2.3277	2.51644	2.07567	2.51238	2.71538	2.82845	2.64353	3.13395	4.74686	2.90269	2.32019	2.18634	3.00476	2.68895	2.16635	1.5176	2.03069	2.5975	2.27494
7349					797.586	441.092	0.759837	3.67066	2.88493	3.65021	5.63358	7.07928	2.82214	4.87629	7.32101	4.20968	3.09157	3.48363	2.32712	3.25579	3.82721	6.27793	2.79077	2.56762	4.12412	3.31525	3.89843	4.8509	2.90771	6.14899	3.085	5.65174	3.29455	2.98303	3.79536	3.84907	4.51613	4.61625	8.92867	4.40139	3.91785	2.69474	7.05512	2.98548	3.99934	2.29435	2.27522	4.21254	3.07399
7065					781.553	426.327	6.73063	6.37873	5.37876	6.16737	7.08118	6.17661	5.82354	6.47081	5.4088	6.57253	6.06994	6.00824	6.49734	5.71987	6.10007	6.33131	6.34949	6.97599	5.82865	5.42521	6.17475	6.05833	5.67078	5.34561	6.09559	5.56484	6.4599	5.05014	5.83867	6.23973	5.48603	5.41921	11.7497	5.8065	5.45371	5.85969	5.54205	5.83489	6.1981	6.48319	5.86677	6.10117	4.9967
7174					787.581	413.015	0.0444305	0.0750195	0.0828131	0.114445	0.151947	0.140335	0.108124	0.0777781	0.163286	0.101684	0.0994965	0.146004	0.0744274	0.108115	0.147472	0.089696	0.0666991	0.124439	0.145716	0.17234	0.111713	0.139714	0.063499	0.142075	0.0863186	0.132569	0.100052	0.135742	0.174706	0.119764	0.230587	0.188966	0.251374	0.172445	0.172295	0.0811597	0.153513	0.100576	0.0922762	0.0730427	0.113077	0.136188	0.133244
7100					783.572	412.805	101.691	234.94	228.375	242.339	243.746	290.851	253.124	264.416	323.324	280.312	244.687	229.232	224.814	276.542	230.959	255.065	235.21	235.425	240.073	289.834	246.248	360.439	220.628	271.405	224.469	252.218	220.358	251.008	297.726	267.467	276.807	283.803	466.504	313.669	235.341	222.419	288.869	264.562	233.843	176.573	225.967	267.704	242.253
6873					771.573	407.558	0.10341	0.592105	0.212567	0.395744	0.373804	0.313878	0.304318	0.352381	0.37379	0.351886	0.361864	0.210044	0.487297	0.577879	0.448449	0.62403	0.292833	0.254124	0.358554	0.289348	0.363915	0.967537	0.286802	0.383131	0.393429	0.528781	0.42998	0.314417	0.365054	0.395947	0.297339	0.388104	0.742971	0.32597	0.441797	0.416001	0.769483	0.574284	0.63868	0.239956	0.435825	0.466774	0.40541
8022					831.568	404.82	0.404503	1.15092	0.615053	0.912704	0.923227	0.563962	1.19024	0.922714	0.699111	1.01185	0.823003	0.713672	1.40456	1.51689	0.963334	0.917454	0.842118	0.830937	0.953307	0.949079	0.915432	1.12816	1.00417	0.782483	1.07377	0.858257	1.07528	1.35961	1.01711	1.05554	0.666558	1.00248	2.76171	0.805172	1.42337	1.00417	1.29168	1.37418	1.26225	0.655042	1.25869	1.14298	0.896637
7234					791.541	404.764	1.15094	9.43821	8.79121	3.87359	4.48781	6.53056	7.77331	13.3684	14.3713	13.3471	11.1883	10.2328	7.73113	10.7326	11.0904	10.0708	6.96135	4.59403	11.3559	10.9027	8.89962	10.3878	7.42996	11.5985	7.18777	6.74308	6.8166	10.0928	9.10961	5.30786	14.0404	9.46578	7.94634	15.195	11.5899	9.63662	12.1102	12.4739	10.9388	2.91945	10.0709	9.55306	9.3764
7266					793.546	404.269	0.891719	1.15011	0.704206	0.499965	1.02055	1.15914	0.631093	0.945125	1.39934	0.766887	0.746641	0.715598	0.691814	0.73923	0.86087	1.21152	0.656964	1.54444	0.788311	0.731408	0.892747	0.81364	0.996421	0.768188	1.07549	0.63391	0.619679	0.732385	0.715828	0.699859	1.08266	0.757513	1.00157	0.956802	0.832374	0.781551	0.810394	0.756449	0.744763	0.406008	0.7558	0.797064	1.00776
7545					807.571	401.228	3.96985	15.0391	13.649	15.3121	12.5632	15.566	15.6754	19.8339	30.0161	24.581	21.0192	24.5158	20.0149	26.2075	19.2887	22.2416	21.0541	16.78	16.9788	21.6969	18.8002	23.7874	16.1117	24.1705	13.7425	16.8302	14.9697	19.6253	20.6615	19.2836	27.0128	21.7109	31.1029	38.2546	21.5114	20.9761	30.8113	31.5052	27.3502	14.4488	20.9759	22.7421	19.8479
8104					835.593	391.975	0.206718	0.937661	0.673151	0.564137	0.585467	0.520327	0.82653	0.898132	1.11513	0.800916	0.840727	0.575905	1.01255	1.23073	0.607616	0.598598	0.644857	0.692154	0.692378	0.991339	0.750751	0.631215	0.625227	0.729369	0.796163	0.774659	0.548527	1.13833	0.786243	0.819066	1.06675	0.929691	1.94925	1.27606	1.33486	0.624961	1.01645	0.927151	0.767911	0.416751	0.721314	0.893998	0.753856
7241					791.54	390.957	0.617754	1.6842	1.61096	1.44571	1.63657	1.69588	2.05868	2.37986	2.43932	1.95733	1.78808	1.54645	2.42834	2.43334	1.7903	1.35826	1.82431	1.44013	1.65546	2.35507	1.8073	1.03798	1.54284	1.67214	1.7543	1.619	1.13614	1.85836	2.14903	1.97285	1.86226	1.97494	5.04614	2.89102	2.69819	1.36758	2.2227	1.90808	1.34073	1.07643	1.33316	1.92319	1.70797
6875					771.56	387.848	0.00696632	0.134028	0.0728992	0.0911202	0.118349	0.1887	0.140873	0.132927	0.141467	0.103903	0.0654834	0.136491	0.11691	0.0760609	0.100174	0.136717	0.116526	0.0889567	0.0964777	0.0867744	0.10759	0.161588	0.0907779	0.143392	0.106875	0.208912	0.0845033	0.0798505	0.114775	0.147737	0.118306	0.109333	0.305837	0.143035	0.0888232	0.0917561	0.130501	0.0675168	0.0720592	0.0796868	0.0743701	0.120982	0.10048
7971					829.553	379.667	1.80349	6.69358	5.8636	6.75171	5.58304	7.53694	6.72784	7.99618	9.69861	9.23087	6.24876	4.5155	5.58108	9.43473	5.97107	6.90516	5.50684	4.77424	6.45261	8.78825	6.60321	7.19118	6.60794	7.07731	5.83275	6.30087	6.1444	7.43682	6.38991	7.98871	7.45509	7.06893	14.6886	9.70714	7.87024	5.45967	8.70187	8.94008	6.2764	3.47579	5.65857	7.31361	5.84562
7063					781.557	379.055	0.779305	4.55844	1.39182	1.87414	2.23177	2.18982	2.35914	3.26565	7.79992	2.60673	2.58482	7.2731	2.12416	4.85294	3.69015	5.45902	0.415321	0.20189	2.58069	2.80332	3.05211	6.22294	1.84065	4.51481	1.81539	3.36176	2.463	2.99755	3.08172	1.93824	1.08503	4.2491	3.6424	1.65146	2.44881	2.50366	3.66413	3.41984	4.42172	1.15967	3.35585	2.99189	3.13896
6120					723.541	372.382	0.0338355	0.539131	0.614136	0.682789	0.418766	0.535194	0.618478	0.61853	0.721154	0.567436	0.946502	0.334502	0.387431	0.60389	0.741541	0.618123	0.367819	0.299201	0.666651	0.72148	0.551829	1.01469	0.326675	0.596445	0.391938	0.597315	0.372983	0.530175	1.01287	0.65558	0.813018	0.647317	0.876676	0.889926	0.738271	0.39155	1.79009	0.507551	0.605537	0.365423	0.35613	0.674008	0.761167
8063					833.578	366.457	0.0766817	0.627915	0.471196	0.553084	0.428858	0.665798	0.615705	0.824778	1.4329	1.03981	0.850547	0.429788	0.729559	1.17771	0.50789	0.715291	0.437915	0.447023	0.628818	1.18429	0.692278	0.858107	0.0206265	0.969104	0.444079	0.65186	0.591754	1.31308	0.752084	0.904505	1.00202	1.02987	1.22505	1.82783	0.891269	0.590154	1.82972	1.50588	0.596102	0.254938	0.528727	0.889337	0.766416
8482					855.57	351.615	0.458706	8.25845	5.14677	2.27018	4.07938	5.09312	7.18807	10.3676	20.1411	6.02505	11.911	5.17687	4.80196	13.4734	6.41285	5.00224	5.2076	5.25666	5.65835	12.1681	7.20488	8.62402	6.98253	16.1555	5.20416	6.61821	6.87804	12.1787	8.63037	7.72771	14.2623	12.1488	11.7028	27.1565	13.1088	7.89352	19.2011	17.9785	8.74035	1.99805	6.49644	10.9843	8.8594
6115					723.54	349.904	0.492609	4.79524	4.94239	5.51427	4.27172	4.65459	5.49301	5.32659	4.95034	4.82013	5.47015	3.02815	4.13042	5.25365	3.85295	6.09009	4.34787	3.58228	6.10543	6.11224	4.66171	6.85116	3.39324	5.46707	3.9996	5.80859	4.07671	5.3598	6.13272	5.79416	5.55875	5.18955	9.84554	5.76103	4.73216	4.19682	8.42377	5.85209	4.86015	2.94271	3.96682	5.41062	4.64633
7023					779.54	347.666	0.0181299	0.132992	0.0488421	0.0797154	0.1019	0.095301	0.115302	0.147667	0.213221	0.0939325	0.148241	0.109354	0.120885	0.193924	0.120835	0.156892	0.10756	0.101138	0.0900171	0.150549	0.11732	0.237695	0.0920016	0.153896	0.0900891	0.152554	0.103579	0.133857	0.156233	0.161154	0.13201	0.193309	0.228725	0.209911	0.122595	0.144072	0.27992	0.261376	0.171042	0.0720718	0.0887722	0.159243	0.12992
7388					799.566	322.946	0.099684	0.6068	0.095216	0.414489	0.438131	0.502395	0.122849	0.429902	0.347404	0.0575809	0.473351	0.175514	0.440853	0.220266	0.313597	0.537229	0.202666	0.268897	0.0732207	0.502423	0.316123	0.311942	0.288413	0.206285	0.251683	0.369765	0.26771	0.133914	0.521165	0.056266	0.269229	0.16792	0.465352	0.270917	0.293179	0.252197	0.201651	0.0732466	0.22451	0.190837	0.329743	0.257296	0.263359
8968					880.83	753.545	0.0119842	0.0124718	0.0112869	0.0205205	0.00985227	0.01249	0.0169267	0.00617666	0.00821742	0.0120813	0.0145408	0.0133653	0.0236631	0.0179601	0.0112302	0.0232061	0.00596956	0.0125835	0.0154997	0.00965806	0.0134842	0.0265949	0.00721511	0.0175819	0.0138786	0.013214	0.00356868	0.0146878	0.0217366	0.0163412	0.00611311	0.0380702	0.0194055	0.0191955	0.00631153	0.0117119	0.0150152	0.0141123	0.0153075	0.179684	0.015924	0.0237835	0.0194419
8912					878.572	320.966	0.0842732	0.663686	0.330954	0.496731	0.894523	0.334187	0.793559	0.455885	0.703011	0.51314	0.312133	0.198702	0.503563	1.14084	0.456288	0.677045	0.398112	0.268742	0.44675	0.847303	0.525971	0.712217	0.407116	0.596737	0.66604	0.560702	0.439207	1.22712	0.75741	0.801153	0.543704	0.887604	1.51049	1.28941	1.01907	0.633553	1.21449	1.45889	0.56539	0.187844	0.595327	0.803674	0.617503
8913					878.566	301.143	0.0479087	0.349276	0.40476	0.374949	0.287089	0.515132	0.5562	0.400002	0.782781	0.526632	0.369162	0.220323	0.238388	0.537307	0.312838	0.622947	0.303219	0.191683	0.460171	0.817036	0.41589	0.465098	0.302754	0.635979	0.348909	0.412498	0.313145	0.592867	0.530963	0.54602	0.559245	0.606721	0.715077	0.996204	0.465047	0.374131	0.928034	0.778473	0.296621	0.143285	0.302528	0.51568	0.465719
5055					660.555	498.966	1.05178	3.75282	2.86141	4.57229	3.13201	2.7973	2.51199	5.85969	5.96263	3.42287	5.10201	4.64895	4.29328	4.3421	4.94074	5.25367	2.59617	3.44344	3.40658	4.87027	3.9411	6.35065	2.75631	2.19552	2.9253	4.12753	2.21395	3.91682	3.67294	3.49811	3.26541	2.58916	3.54214	2.32613	4.48471	3.15762	2.68396	2.30044	4.97736	2.66745	3.52314	3.35873	4.45907
5358					678.675	633.157	0.0802365	0.221195	0.107145	0.257609	0.243454	0.285311	0.195191	0.218294	0.25652	0.295122	0.231144	0.184656	0.26379	0.424498	0.287358	0.364947	0.343007	0.191756	0.175833	0.384615	0.250584	0.372364	0.269244	0.158086	0.203118	0.292945	0.308497	0.370749	0.312991	0.248037	0.288945	0.285689	0.437486	0.240582	0.209438	0.237739	0.366663	0.370734	0.243577	0.14194	0.236483	0.279765	0.245152
5730					700.572	274.359	0.00122265	0.0604835	0.0368865	0.0802217	0.0418792	0.0376873	0.0633313	0.0520414	0.0523508	0.048698	0.0651921	0.0418537	0.0404485	0.0650645	0.0562972	0.0585572	0.0443042	0.0400435	0.046602	0.0570997	0.0495132	0.0722456	0.0368146	0.0676468	0.0347841	0.0813522	0.0335897	0.0556967	0.0634097	0.0518109	0.0638194	0.0496741	0.069093	0.0560353	0.0658504	0.0362684	0.0883643	0.0706993	0.0485875	0.031475	0.0402186	0.0558718	0.0546201
10428					998.814	678.297	0.10311	0.408105	0.20327	0.176222	0.12727	0.0903744	0.251649	0.202186	0.714419	1.28703	0.926261	0.489237	0.597614	0.375876	0.1676	0.131948	0.133784	0.220156	0.161689	0.181539	0.347467	0.360058	0.173833	0.475179	0.244275	0.148404	0.19539	0.373654	0.254182	0.377463	0.153436	0.296	0.555576	0.603176	0.581802	0.270965	0.495293	0.483829	0.197387	0.128261	0.234194	0.330118	0.303848
9134					890.813	737.512	0.13523	0.0880962	0.121691	0.350421	0.103138	0.0941639	0.0431295	0.120559	0.17467	0.348994	0.125711	0.390972	0.528265	0.352411	0.171349	0.469509	0.156829	0.314813	0.112759	0.0991167	0.215091	0.198723	0.0860257	0.0410676	0.101023	0.227765	0.124058	0.0494233	0.0773483	0.208449	0.0521201	0.0928412	0.0845301	0.0812829	0.0439472	0.119671	0.174964	0.0829012	0.214082	0.419876	0.16744	0.132377	0.193096
9875					944.806	651.721	0.0229015	0.014706	0.00442416	0.0445861	0.00346907	0.00186446	0.00338105	0.0217187	0.0545513	0.0271581	0.0220773	0.0108961	0.0176687	0.0028918	0.00238664	0.00524892	0.00670147	0.0251739	0.0020066	0.00345381	0.0148633	0.0134194	0.00413088	0.00568754	0.0065414	0.00394577	0.00483152	0.0252394	0.00816318	0.0107818	0.00109901	0.0175739	0.00619453	0.0425625	0.00848568	0.00959274	0.00311027	0.015093	0.00122172	0.0320848	0.00588991	0.0112825	0.00773502
5141					664.651	588.851	0.000860659	0.0100638	0.00298807	0.0079359	0.00684595	0.00558542	0.00387988	0.0145283	0.0161893	0.00600665	0.00998907	0.00418405	0.00567771	0.0190263	0.0222838	0.0433741	0.00340039	0.00508605	0.00666387	0.0179657	0.0106267	0.0180191	0.00873252	0.00707872	0.00467374	0.0104759	0.00616132	0.00415793	0.00511474	0.00479284	0.00604686	0.0045269	0.00694221	0.0194477	0.00649291	0.0031445	0.0186022	0.00798836	0.0107448	0.00229365	0.00528633	0.00803616	0.00889802
4872					648.629	573.993	1.91075	9.63523	5.33349	8.02115	0.693598	4.00776	3.78548	14.0515	15.8622	10.6961	8.17145	8.75074	10.3579	14.9867	8.6729	14.2998	7.655	7.98677	10.9423	11.1466	8.84837	4.68836	7.3195	3.98717	6.13123	10.432	5.7922	7.09876	3.77349	4.44765	5.79224	7.25847	12.0694	18.9943	8.07357	0.312894	0.649266	0.519933	5.23209	3.982	7.08691	6.18207	5.58876
7850					822.753	709.882	0.833932	0.587031	0.546827	1.26311	0.389065	0.428685	0.550673	1.06491	1.3214	1.18656	0.708369	3.29375	6.14467	1.7544	1.40036	2.02012	0.798237	3.21732	0.608814	0.691333	1.44048	0.741522	0.858415	0.316833	0.962947	0.840037	0.331738	0.624893	0.764973	1.12853	0.434046	0.885963	0.872494	0.703827	0.3549	0.853463	0.691005	0.586116	1.69187	4.97356	0.791234	0.970418	1.31082
9871					944.767	676.199	0.23085	0.517561	0.392765	0.412687	0.219149	0.432644	0.326773	0.281514	1.16083	1.32445	1.55346	1.38193	0.442764	0.453956	0.193299	0.302555	0.238949	0.679695	0.267136	0.206307	0.550964	0.623941	0.281982	0.724365	0.702593	0.300665	0.32355	1.26536	0.592023	1.13857	0.302061	0.813694	0.521158	0.865217	0.81983	0.715854	1.61636	0.700423	0.240292	0.436102	0.326277	0.665516	0.495761
6261					732.553	445.296	0.205727	0.847935	0.415279	0.635376	0.381809	0.512983	0.507614	3.56568	0.514822	0.394959	0.689887	0.558317	0.6925	0.614838	0.680528	0.831916	0.551979	0.502335	0.603259	0.61783	0.716279	4.36215	0.453305	0.779093	0.541644	0.701937	0.554245	0.570856	0.568415	0.506303	0.72519	0.475323	0.951074	0.830266	0.605215	0.558952	0.665827	0.508315	0.581995	0.47923	0.589466	0.80044	0.559726
8615					862.625	377.365	0.224217	0.39749	0.363123	0.889918	0.379628	0.860272	0.514836	0.434577	0.666285	0.518552	0.411915	0.380775	0.671235	0.809234	0.709111	0.695539	0.832267	0.683659	0.526728	0.680568	0.582496	0.617524	0.44492	0.491624	0.464079	0.464317	0.402223	0.491243	0.438853	0.596523	0.667938	0.403344	1.1511	0.455479	0.358213	0.345286	0.891942	0.716593	0.787586	0.372668	0.4656	0.551353	0.556583
10398					996.798	678.267	0.0731118	0.536671	0.206494	0.148271	0.111151	0.0954242	0.299337	0.257279	0.855964	1.43342	1.43021	0.219843	0.975299	0.55383	0.327412	0.13983	0.140909	0.281765	0.157292	0.177126	0.421032	0.376288	0.459163	0.831609	0.319172	0.148591	0.163249	0.427725	0.250842	0.301248	0.40202	0.558063	0.63053	1.18174	0.874503	0.270133	0.482242	0.874793	0.299837	0.0809318	0.216553	0.457462	0.365239
9240					896.769	691.53	1.42489	1.72064	2.15795	4.14065	1.48759	2.03824	1.83227	0.771064	2.74168	8.2149	2.57204	2.16561	2.28538	1.75601	0.897509	1.77192	0.935471	2.42629	1.26259	1.63529	2.2119	2.38794	1.21169	1.2846	1.75805	1.27542	0.940685	2.30461	1.99021	4.93338	1.06262	2.61597	2.37769	4.17781	1.16724	3.22777	3.60073	4.68986	0.92479	3.20559	1.06726	2.31019	1.96318
1979					372.274	49.8036	0.00704105	0.0347527	0.00524308	0.0172803	0.0166056	0.0134931	0.0180383	0.0340989	0.0187766	0.0068574	0.0325419	0.0109912	0.0314144	0.0257864	0.0222792	0.0169373	0.0160178	0.0167674	0.00981465	0.0296112	0.0192174	0.0145414	0.01329	0.0123661	0.0186679	0.0313784	0.0194935	0.0162525	0.0254683	0.0119946	0.0176266	0.0170623	0.0296469	0.0282542	0.0233641	0.0184222	0.0291812	0.014309	0.0209818	0.00690256	0.0212585	0.0195231	0.0181723
9401					906.837	729.872	0.392654	0.123326	0.319743	0.522344	0.103177	0.316411	0.120532	0.259838	0.484987	0.789723	0.452126	1.02295	0.448156	0.510425	0.492137	0.690718	0.464618	1.03192	0.351339	0.286367	0.459175	0.190397	0.139498	0.0932107	0.230639	0.402932	0.11423	0.11652	0.178071	0.35752	0.196829	0.154377	0.559551	0.278711	0.204282	0.271205	0.165443	0.170494	0.484912	1.04227	0.47268	0.291188	0.423225
8857					874.786	713.629	11.2083	5.46547	13.0667	20.1734	5.30335	5.81971	4.97497	8.28211	16.963	43.4541	15.4325	36.6613	29.298	17.8206	13.222	31.1971	15.1564	40.6372	13.2032	10.023	17.8681	10.5481	4.59044	3.35598	8.51598	11.8724	3.88295	6.70288	8.16762	14.4329	5.62094	8.13295	6.97515	9.71968	4.97598	10.554	8.05761	8.16231	15.8644	41.9647	14.434	10.3265	13.4645
5497					686.571	496.837	0.0525009	0.546466	0.15217	0.259633	0.145301	0.14568	0.427142	0.334866	0.375737	0.339313	0.587089	0.159883	0.528958	0.5284	0.280428	0.198486	0.19394	0.22369	0.204239	0.418117	0.305102	0.308379	0.191147	0.120164	0.277924	0.31115	0.137972	0.372334	0.327354	0.236641	0.167444	0.244444	0.663693	0.42041	0.628387	0.218157	0.330227	0.375637	0.307185	0.104166	0.186901	0.296486	0.281866
5494					686.569	482.886	0.123628	0.424879	0.351812	0.221302	0.310319	0.232174	0.251326	0.560513	0.587035	0.45918	0.49753	0.484648	0.550548	0.398742	0.580425	0.382925	0.362909	0.331087	0.331049	0.453039	0.394753	0.319908	0.361454	0.61268	0.286229	0.302432	0.238939	0.217079	0.403003	0.2175	0.404888	0.282368	0.337691	0.281665	0.377218	0.286854	0.199774	0.22243	0.433565	0.23673	0.435487	0.322895	0.321809
2497					428.364	110.103	0.00035296	0.00495891	0.00171865	0.00228611	0.00152879	0.0124561	0.0101922	0.0276973	0.216197	0.0435492	0.0753752	0.0442944	0.024452	0.0353515	0.0625898	0.0600313	0.0028222	0.0325978	0.0622087	0.0683615	0.0394511	0.00877461	0.00319489	0.0848747	0.00385797	0.0296512	0.00260218	0.0557858	0.0155793	0.0350832	0.0710128	0.0114797	0.109759	0.239526	0.0201633	0.0272528	0.0503163	0.114458	0.0103172	0.013917	0.0246105	0.0466108	0.038828
2495					428.373	172.73	0.00359696	0.0355033	0.0167431	0.0027057	0.0404379	0.0583381	0.0650992	0.118646	0.43349	0.105771	0.024883	0.0178694	0.090567	0.116847	0.0377495	0.14735	0.0519605	0.0512152	0.0212097	0.111797	0.077589	0.00416049	0.0505367	0.165958	0.0267418	0.0591734	0.0400989	0.195765	0.084617	0.113485	0.250692	0.0565523	0.0556081	0.373854	0.0493171	0.0337282	0.172237	0.172868	0.0652776	0.0977326	0.0617763	0.106509	0.104696
2173					394.271	96.6384	0.000364415	0.00191722	0.0575799	0.0186613	0.000715958	0.00120113	0.000839731	0.00928053	0.0196656	0.00666385	0.00687815	0.0169476	0.00143927	0.0113879	0.00799823	0.00246775	0.00177909	0.00235851	0.00389099	0.0108421	0.00914396	0.0158753	0.000776732	0.00250435	0.000453343	0.00350356	0.0347407	0.00141677	0.00192776	0.00116379	0.00279333	0.00131422	0.0357772	0.00496211	0.00193972	0.000891336	0.00575406	0.00633274	0.0115492	0.0010467	0.00308659	0.00689047	0.00365583
5322					676.659	604.363	0.0665758	0.31403	0.119186	0.355618	0.225151	0.237638	0.218723	0.273546	0.422309	0.293462	0.166519	0.289119	0.259843	0.354488	0.266057	0.380251	0.317642	0.242102	0.245658	0.419676	0.27338	0.218421	0.232914	0.103639	0.216706	0.307834	0.263493	0.299533	0.256105	0.201375	0.16402	0.246774	0.352917	0.375308	0.222721	0.228185	0.441387	0.218446	0.266707	0.15561	0.206424	0.248926	0.185286
3855					568.34	72.9455	0.0130914	0.125894	0.0580022	0.0383687	0.0574605	0.0979074	0.117451	0.236963	0.299472	0.156918	0.358511	0.0946551	0.156897	0.244419	0.199682	0.225437	0.109211	0.11589	0.0580229	0.204211	0.148423	0.162572	0.10034	0.236395	0.041692	0.114003	0.0804329	0.206994	0.190203	0.111835	0.298852	0.169092	0.295827	0.300826	0.345933	0.145747	0.43706	0.181336	0.304668	0.0364111	0.137971	0.194909	0.162714
8925					878.81	728.721	2.43387	1.30933	2.40538	4.05121	1.31707	1.3852	1.29375	1.9685	3.45419	5.99291	2.87858	8.49652	8.36806	3.82823	3.25797	6.44548	2.83003	7.33717	2.2297	1.9397	3.66114	2.12914	1.13459	0.998668	2.15826	2.37454	1.0243	1.47605	1.89252	3.54748	1.36258	2.03055	1.61536	2.09905	1.01269	2.35106	1.63612	1.65698	3.40298	8.81201	2.88481	2.27999	3.00341
10193					974.812	686.869	0.333608	0.883752	0.500565	0.506731	0.404575	0.299878	0.477294	0.467044	1.3967	1.95255	1.76965	0.94526	1.02824	0.907283	0.302712	0.498744	0.320366	0.545008	0.460469	0.320251	0.716034	0.960955	0.525305	0.826085	0.628755	0.370606	0.365702	1.10992	0.538533	1.07079	0.337708	0.70443	0.805592	1.06144	1.45097	0.674727	0.842325	1.03469	0.447279	0.441833	0.469251	0.733345	0.595216
10188					974.726	661.615	0.0879779	0.296383	0.157041	0.118654	0.111877	0.111581	0.17223	0.198823	0.57964	0.708884	0.796637	0.153366	0.25849	0.29084	0.104405	0.149817	0.106736	0.151216	0.130211	0.138063	0.241143	0.291472	0.198072	0.426622	0.160833	0.134632	0.16151	0.321505	0.222367	0.317652	0.166184	0.317823	0.359222	0.453553	0.320196	0.219241	0.504514	0.356695	0.145648	0.0854409	0.129771	0.264648	0.238452
7203					789.547	407.147	0.282709	0.157198	0.556125	0.636679	0.65404	0.709637	0.552633	0.619099	0.471384	0.651556	0.488847	0.425361	0.453959	0.596071	0.723275	0.300598	0.525165	0.470186	0.599507	0.530729	0.520238	0.787074	0.526539	0.568075	0.418404	0.543188	0.61122	0.196091	0.503488	0.20297	0.375397	0.669081	0.846906	0.600438	0.476768	0.489014	0.68259	0.620204	0.422801	0.575808	0.296073	0.520606	0.461168
5321					676.622	578.044	0.00269057	0.0368415	0.0125411	0.0378725	0.0194326	0.0312219	0.0223719	0.0218127	0.0300808	0.0367052	0.0258543	0.0171913	0.0169836	0.0509224	0.0492663	0.0332049	0.030478	0.0181979	0.0352576	0.0501248	0.0289526	0.0347684	0.0272704	0.0103495	0.0176095	0.0273324	0.0251193	0.0232403	0.021281	0.00594353	0.00773343	0.0229873	0.0282074	0.0414424	0.0232014	0.0204927	0.0482015	0.0518903	0.0295364	0.0109349	0.0226527	0.0250097	0.0251725
9587					920.769	684.343	0.78797	1.28069	1.5265	1.76126	0.716951	0.922804	1.23175	0.77447	3.04614	4.70238	2.54742	2.48322	1.65755	1.41796	0.653189	1.25399	0.810252	0.758832	0.8052	0.791162	1.49648	2.22607	1.02599	1.50267	1.42964	0.88623	0.927677	2.07983	1.68065	4.22162	1.01409	2.66592	2.42452	3.91804	1.33337	2.08129	2.45321	2.05278	0.876818	1.8923	0.915019	1.88039	1.55518
9586					920.716	699.705	0.0763458	0.0585845	0.0753832	0.111714	0.0490696	0.0578838	0.0513122	0.0426986	0.0737676	0.106352	0.104344	0.0582718	0.0939506	0.0934426	0.0584399	0.0916254	0.0595697	0.148546	0.0523266	0.0828509	0.077324	0.0758982	0.0366831	0.0385088	0.0580795	0.0599095	0.048591	0.0488897	0.0607335	0.0836862	0.0375933	0.0463153	0.0699967	0.0685791	0.0723188	0.0682524	0.116848	0.0898144	0.0655761	0.175149	0.0648886	0.0693156	0.0662612
10219					976.828	704.395	1.17368	1.31988	0.993872	0.982924	0.595298	0.584318	0.921054	0.70015	1.73217	2.88072	3.31272	1.06381	1.82663	1.09738	0.487122	0.588015	0.635414	0.872035	0.65213	0.699649	1.15595	1.36732	0.744358	2.32596	1.19761	0.673643	0.646025	1.42283	1.18539	1.76833	0.628049	1.11853	2.01412	1.56571	0.900302	1.01148	2.49542	1.37734	0.610269	0.682277	0.646038	1.21905	0.843235
10223					976.825	687.73	0.12452	0.288839	0.252872	0.206193	0.11554	0.133725	0.203519	0.160435	0.382288	0.677789	0.532226	0.190201	0.517472	0.318312	0.129169	0.136733	0.0962715	0.173614	0.136378	0.13037	0.245323	0.446951	0.201398	0.261865	0.236431	0.12219	0.168023	0.282637	0.237622	0.372797	0.11397	0.212004	0.371266	0.271197	0.500702	0.249914	0.3263	0.338383	0.197347	0.163901	0.177272	0.262608	0.207103
8691					866.763	740.777	0.0763483	0.0927801	0.0641356	0.172953	0.0482563	0.0542027	0.0694798	0.0355413	0.0772148	0.100989	0.109986	0.0265641	0.0887537	0.0942421	0.0389911	0.0700223	0.0378333	0.0585457	0.0562231	0.0538796	0.071347	0.112656	0.0566384	0.0766767	0.0392294	0.0517638	0.0351161	0.0782891	0.0703395	0.0995736	0.0317361	0.0731072	0.101969	0.0985732	0.0545621	0.061191	0.0654078	0.0686702	0.0551498	0.16327	0.0596634	0.0726791	0.0669754
10364					992.862	695.554	0.289087	0.451291	0.260122	0.486818	0.288633	0.253651	0.33334	0.288935	0.713456	0.892085	0.434506	0.50812	0.550626	0.374162	0.121855	0.32278	0.24641	0.354027	0.274748	0.238081	0.384137	0.677204	0.255804	0.38623	0.515885	0.286096	0.289788	0.655172	0.379322	0.497732	0.243734	0.492805	0.596966	0.666221	0.435744	0.563366	0.751822	0.679917	0.0907803	0.175432	0.385215	0.451262	0.255525
4839					646.604	513.644	0.00872992	0.026406	0.0115039	0.0256355	0.0138428	0.0224844	0.0175728	0.0290478	0.0299307	0.00233263	0.016908	0.0224441	0.0328879	0.068572	0.0535353	0.0299588	0.0316137	0.0150148	0.0392817	0.0664507	0.0282077	0.0170476	0.0257994	0.015278	0.00750203	0.021658	0.014642	0.0116048	0.0243964	0.0131627	0.0264592	0.0155051	0.0444922	0.0454451	0.0121995	0.0128158	0.0391806	0.0273427	0.0302914	0.00904989	0.0351519	0.0224512	0.0319204
3368					524.249	99.8857	0.204619	0.183848	0.155624	0.174586	0.18239	0.180023	0.177895	0.174257	0.169721	0.196967	0.150439	0.182568	0.180707	0.173038	0.153631	0.129236	0.178603	0.196125	0.189606	0.1665	0.175019	0.196643	0.164937	0.180895	0.182818	0.186699	0.195292	0.178639	0.171136	0.219935	0.177311	0.197693	0.401039	0.19941	0.19577	0.181243	0.204164	0.211337	0.196338	0.172428	0.165823	0.198977	0.172158
3371					524.274	74.8919	0.0536202	0.185916	0.0416181	0.174496	0.181835	0.148075	0.0892535	0.227147	0.161135	0.025385	0.225846	0.0896079	0.162641	0.12469	0.174577	0.182995	0.106843	0.142481	0.0453457	0.231315	0.138741	0.19294	0.14681	0.0647496	0.104546	0.20157	0.166916	0.111838	0.238259	0.0900244	0.092339	0.0799341	0.274666	0.203448	0.184461	0.15469	0.0666117	0.0292366	0.156653	0.0754151	0.128398	0.138175	0.130665
1950					370.295	91.8547	0.0483889	0.0480588	0.0901113	0.136151	0.0200261	0.593355	0.502868	0.0448358	0.05537	0.179343	0.0455633	0.0896706	0.103416	0.474112	0.627206	0.119443	0.0468444	0.276816	0.119013	0.0949034	0.185775	0.080408	0.0291852	0.0249832	0.0948384	0.0295237	0.0356186	0.330722	0.11959	0.123604	0.0359569	0.15049	0.857116	0.134787	0.419119	0.234281	0.192082	0.354028	0.194915	0.139194	0.278389	0.192942	0.167095
10168					972.797	669.743	0.162551	0.508802	0.160141	0.213824	0.0844091	0.154622	0.167186	0.144396	0.416735	0.675595	0.834502	0.761363	0.328295	0.241913	0.0915965	0.298021	0.0786593	0.137801	0.120478	0.218461	0.289967	0.283955	0.185667	0.328141	0.151215	0.110672	0.11148	0.278241	0.197555	0.255428	0.125345	0.215755	0.343645	0.785109	0.332425	0.179129	0.392331	0.347994	0.263722	0.115892	0.148266	0.257598	0.225579
9937					950.766	744.367	0.0890366	0.0493086	0.0126949	0.136453	0.0638266	0.0122116	0.0142706	0.0650277	0.0787377	0.0841799	0.061631	0.17295	0.158513	0.0806876	0.0998938	0.156513	0.0062819	0.124839	0.0098118	0.0557827	0.0766326	0.0839828	0.0143445	0.0191137	0.0598277	0.0107514	0.0392849	0.016803	0.0207714	0.113196	0.00723195	0.0705376	0.0210872	0.0713803	0.0479435	0.102437	0.0634732	0.0368917	0.0722689	0.164548	0.0116261	0.0523751	0.0833106
9938					950.745	729.351	0.064203	0.0330737	0.066091	0.103945	0.0361157	0.0336802	0.0251359	0.0479143	0.0867352	0.00616739	0.0790158	0.208659	0.162476	0.0932788	0.0844017	0.160439	0.0856019	0.163296	0.0572521	0.049451	0.0823466	0.0753939	0.0300332	0.0263349	0.0470188	0.0736346	0.0299301	0.0557164	0.049118	0.0687766	0.0318333	0.0436732	0.0392842	0.0692594	0.0273446	0.0518934	0.0361322	0.0344713	0.0846254	0.145569	0.0901278	0.0555085	0.0673551
9939					950.814	716.188	1.64227	3.24504	2.77556	2.78217	1.42042	1.36215	1.94554	1.52748	4.08943	7.66158	5.12073	2.11856	4.66522	2.8916	1.41286	1.4417	1.2628	2.35923	1.59271	1.59744	2.64572	3.09292	1.75817	2.5705	3.02774	1.49099	1.45022	3.50555	2.50016	4.69958	1.23846	2.75254	4.13711	3.15879	2.39621	2.85484	3.17455	3.19653	1.18526	1.94774	2.02825	2.60831	2.51964
10167					972.711	646.574	0.00228345	0.0374318	0.0074538	0.00295001	0.00318061	0.00148314	0.0061348	0.0102902	0.0757986	0.0582367	0.0811293	0.0357594	0.0206875	0.0249845	0.00564379	0.0067478	0.0113535	0.0127346	0.00346823	0.00532345	0.0206538	0.031774	0.0145195	0.0399427	0.013686	0.0074132	0.00785457	0.0341787	0.0204457	0.0193294	0.00708647	0.0319317	0.0184573	0.0535521	0.0335062	0.0249991	0.0388179	0.0326017	0.0162507	0.00413886	0.0155772	0.0233031	0.0227534
5288					674.643	578.119	0.0575317	0.343181	0.162185	0.340542	0.191925	0.320084	0.215199	0.274054	0.319902	0.347963	0.289062	0.191269	0.224837	0.485384	0.41774	0.349634	0.325465	0.187467	0.308425	0.462379	0.290711	0.385799	0.240605	0.158196	0.191722	0.289561	0.257708	0.268645	0.254672	0.220636	0.317955	0.262051	0.369153	0.3396	0.235132	0.21288	0.514657	0.478995	0.307428	0.126036	0.254101	0.284277	0.262503
8969					880.822	727.952	0.229753	0.146484	0.227202	0.411328	0.141991	0.143595	0.157508	0.214929	0.325602	0.492549	0.268579	0.804456	0.794116	0.37924	0.346001	0.632879	0.240777	0.662673	0.188738	0.194933	0.350167	0.208047	0.122791	0.118585	0.247103	0.224528	0.0948523	0.164271	0.226671	0.380568	0.145746	0.221963	0.183645	0.227636	0.106973	0.260114	0.174026	0.184633	0.361332	0.794951	0.255742	0.235209	0.316015
9893					946.778	668.042	0.0840093	0.187016	0.124753	0.146145	0.0670073	0.0840152	0.118266	0.0905986	0.346308	0.467708	0.492125	0.127553	0.209065	0.169557	0.0620446	0.118753	0.061555	0.12388	0.08598	0.0846109	0.162547	0.470552	0.122897	0.193857	0.118234	0.0914368	0.088975	0.225606	0.16713	0.251171	0.0883635	0.201349	0.228961	0.333759	0.170522	0.16698	0.301979	0.265258	0.18547	0.134228	0.124278	0.19655	0.162898
10141					970.776	660.949	0.0208104	0.0857348	0.0470559	0.0358784	0.0235237	0.0217689	0.0492784	0.0501662	0.196887	0.24068	0.268025	0.0556209	0.0783103	0.07747	0.0312405	0.0506365	0.0241515	0.0434034	0.031706	0.0471578	0.0739753	0.0843594	0.0521251	0.142279	0.0469699	0.0389512	0.0374228	0.094186	0.062067	0.0943314	0.0415326	0.0784106	0.0934979	0.140275	0.088298	0.067362	0.140408	0.108735	0.0420834	0.026748	0.0401204	0.0760081	0.075974
10588					1018.73	678.269	0.00359724	0.0549282	0.0240863	0.102808	0.0115806	0.0072993	0.0348672	0.0324419	0.0753623	0.0918237	0.112022	0.0200768	0.0878719	0.0513355	0.0269105	0.00600083	0.0184401	0.0212825	0.0208522	0.0227875	0.0413187	0.0473317	0.0222912	0.0804996	0.0404185	0.0140936	0.0173025	0.0490659	0.0282098	0.0267626	0.0283485	0.0216776	0.0724974	0.0763606	0.103048	0.0230649	0.0582246	0.0443273	0.0312241	0.0593734	0.0278516	0.0435987	0.0362746
10586					1018.78	657.597	0.00483015	0.0925001	0.0223711	0.00477623	0.0150655	0.00525208	0.0621015	0.0603378	0.214712	0.29209	0.336941	0.0290161	0.127948	0.134957	0.0251207	0.0124855	0.0317625	0.0401687	0.0181102	0.0239286	0.0777237	0.0755707	0.0440023	0.255478	0.0336695	0.0194953	0.028999	0.0799452	0.0470306	0.022046	0.0391176	0.0410448	0.0870911	0.138641	0.20593	0.058556	0.105256	0.0871208	0.0680007	0.0010049	0.0472635	0.0742632	0.0728816
6467					746.56	466.373	1.42274	3.15731	2.11661	3.26058	2.70053	3.24224	3.01226	3.08279	2.97761	3.71005	3.22073	1.94909	2.53198	4.17166	3.0009	3.44473	2.55115	1.92849	3.10282	3.52506	2.90547	3.92909	2.50815	2.59849	2.63934	2.49533	3.16753	2.72583	3.59512	2.89595	2.80143	3.39349	4.77213	3.11712	2.57862	2.58517	4.52066	4.55807	3.20526	1.63276	3.42802	3.15738	2.67511
9916					948.71	653.341	0.0308283	0.0930554	0.0267882	0.0329485	0.0201215	0.0169547	0.0314186	0.0367014	0.16027	0.111343	0.156137	0.0191185	0.074184	0.0489233	0.0191332	0.0388855	0.00967297	0.0492435	0.0252264	0.0257974	0.0513376	0.0905729	0.0377183	0.051321	0.0425293	0.0224475	0.0305067	0.0950792	0.0508575	0.0870477	0.0270248	0.0677506	0.0738319	0.12656	0.0620746	0.0727223	0.0818502	0.0739716	0.0396512	0.0360101	0.0330246	0.0601276	0.048762
10629					1022.82	682.599	0.0159892	0.138567	0.130411	0.0420329	0.0285415	0.045596	0.128968	0.078808	0.230079	0.448267	0.407805	0.0599786	0.281816	0.155931	0.0613791	0.0230101	0.0579154	0.107244	0.0390634	0.0550298	0.126822	0.0967226	0.0622196	0.187086	0.153188	0.0628792	0.0341937	0.127217	0.075524	0.185592	0.0512226	0.0593014	0.366766	0.191681	0.240177	0.080741	0.111351	0.108394	0.0687485	0.0194613	0.0466376	0.116455	0.102896
10624					1022.73	646.616	0.00155181	0.0430935	0.0103252	0.00106003	0.00827605	0.00378562	0.0246296	0.0274393	0.126432	0.111273	0.131274	0.0347185	0.025314	0.0488869	0.0142101	0.011229	0.0146601	0.0124333	0.00783236	0.0141884	0.0336306	0.0436181	0.0222605	0.120124	0.0126075	0.0137206	0.0250183	0.0385602	0.0299031	0.0237362	0.0269645	0.026567	0.0231524	0.0811217	0.055727	0.0330424	0.0667055	0.0511404	0.0255543	0.00290237	0.0242463	0.0373336	0.037559
9371					904.829	729.819	2.59706	1.48378	2.44377	3.72684	1.36266	1.47732	1.2413	1.89125	3.32309	5.94986	3.15744	6.14433	5.88689	3.59043	2.86422	5.31525	2.86013	5.96347	2.27735	1.95547	3.2756	2.53543	1.19522	1.09343	2.13531	2.42179	1.21382	1.60591	1.95462	3.30202	1.35316	1.8051	1.78302	2.02244	1.09978	2.33896	1.71062	1.86379	2.92467	6.3119	3.10234	2.18867	2.82453
8465					854.559	367.802	0.0525779	1.04068	0.82455	0.58325	0.611321	0.830006	0.827554	1.30488	1.84317	1.45444	1.53108	0.548883	0.560404	1.47516	0.869304	0.775059	0.54921	0.500901	0.625007	1.28414	0.904579	1.15493	0.892385	1.66995	0.609932	0.863081	0.832248	1.47091	1.3424	1.09815	1.9794	1.36319	1.69081	2.52763	1.4617	0.933692	2.17648	2.01742	0.986187	0.207705	0.921447	1.30998	1.15736
9670					926.727	683.418	0.544039	0.789192	0.904727	1.00598	0.523128	0.874179	0.772112	0.555659	1.57075	2.07842	1.76939	1.32643	0.832103	0.830842	0.452499	0.828823	0.666757	0.910911	0.556021	0.546257	0.916911	1.36636	0.652137	0.896218	0.709878	0.603435	0.67908	1.14243	0.988569	1.91418	0.705679	1.34279	1.23951	1.72894	0.858538	1.26654	1.3621	1.12622	0.733475	1.01284	0.753196	1.05411	1.17564
7469					804.549	413.842	13.3873	12.426	12.1394	11.0778	14.2064	13.3235	11.9516	13.4564	12.4254	12.4766	11.6106	13.2585	13.5741	11.252	12.7331	11.6079	13.1218	14.0769	12.4841	11.1083	12.5849	10.8512	11.4889	11.8402	12.4087	11.8767	12.2507	10.7047	12.3631	13.1251	12.1163	11.6872	26.2492	11.5794	12.0759	11.5926	10.9293	10.4846	12.5192	12.9252	12.6531	12.5861	10.3003
7470					804.548	389.969	5.14275	12.679	10.6777	16.625	11.4866	11.8908	12.8609	13.9953	14.3073	15.3546	13.5938	7.06395	8.77012	17.6596	12.2836	19.6433	11.9174	8.63273	14.2052	16.3608	12.7575	22.8809	11.9024	13.4798	9.70043	11.3964	14.8204	13.0948	14.728	14.7338	11.9414	13.2938	18.5679	13.507	10.2701	12.7708	23.1822	20.9606	12.9634	8.26987	13.0095	14.2737	13.3286
10054					962.848	745.699	0.101895	0.060012	0.0908709	0.142654	0.0645896	0.0659926	0.0530716	0.0733011	0.0934351	0.0899645	0.0648072	0.187703	0.187715	0.101679	0.141074	0.174916	0.0781406	0.147637	0.0709198	0.0625485	0.102646	0.0965507	0.0539799	0.0576944	0.0672132	0.0858476	0.0483866	0.0557974	0.0733743	0.13261	0.0530841	0.0814658	0.0919897	0.0774655	0.0455842	0.109844	0.0937848	0.0525538	0.0826431	0.177525	0.0771481	0.0807271	0.131584
2203					398.326	92.3832	0.0705075	0.0500786	0.104789	0.219164	0.0294673	0.691117	0.640592	0.088063	0.343957	0.207276	0.108997	0.139744	0.132624	0.501452	0.485106	0.177497	0.0451372	0.381009	0.166684	0.167621	0.237544	0.10335	0.036804	0.109047	0.0992552	0.0659048	0.0376216	0.879653	0.195703	0.164167	0.222316	0.333285	0.906777	0.346284	0.45376	0.318746	0.346067	0.447674	0.230101	0.183351	0.290179	0.288502	0.211703
10052					962.907	788.902	0.0902495	0.0803193	0.0510733	0.0769757	0.0702691	0.0449376	0.0279815	0.0608193	0.0461688	0.0747466	0.0446359	0.132505	0.0516907	0.0581584	0.0532741	0.0682402	0.0383549	0.0592663	0.0337697	0.0660359	0.0614736	0.0589186	0.0550146	0.0374225	0.0499884	0.060851	0.0308149	0.0571539	0.0636985	0.0900099	0.0440633	0.0525525	0.0694742	0.0657835	0.0420364	0.0581076	0.0548633	0.0471632	0.030634	0.194082	0.0367714	0.0599702	0.0615804
9962					952.827	708.469	0.0928954	1.52822	1.29512	0.307274	0.747344	0.750656	1.03096	0.773553	1.48776	2.78143	0.784862	1.20439	1.72173	1.34196	0.738259	0.771552	0.140587	1.08636	0.896336	0.74599	1.01136	1.72924	0.819452	0.807574	1.39353	0.757891	0.635824	1.54428	0.158081	2.31061	0.661817	1.30485	1.96265	1.53426	1.10346	1.35688	1.56168	1.57629	0.720452	1.03048	0.916208	1.19427	1.30572
10382					994.816	648.572	0.0234835	0.0276784	0.0069198	0.0425129	0.0303272	0.0299327	0.0120516	0.0371599	0.115297	0.142141	0.0244746	0.0151899	0.0219402	0.0185629	0.029321	0.0398836	0.0190856	0.0294972	0.0105208	0.0426445	0.0359312	0.0529528	0.0152663	0.00733441	0.0118133	0.0252631	0.0234196	0.0039834	0.0314027	0.00351604	0.00812184	0.0310398	0.0133031	0.0187606	0.00834771	0.0225074	0.0111705	0.0517103	0.0156348	0.0212902	0.00989921	0.0193368	0.0199528
6798					766.575	440.678	10.2784	35.3494	38.8081	24.4521	26.1417	32.1736	50.2394	42.7043	57.4449	42.0927	47.8561	39.1831	31.7883	40.2754	39.8137	29.2436	31.4619	40.9317	42.1717	42.0028	37.2206	47.4529	27.6327	49.2289	23.6579	34.5589	25.0939	38.6603	32.9709	37.8851	52.7967	34.0094	71.2845	52.2695	44.5491	26.2867	57.7114	34.1187	42.6087	23.0928	39.2342	39.7552	38.2538
6859					770.596	451.991	0.621715	2.89	2.15245	2.58748	3.22971	3.16142	4.00904	3.33943	3.65723	3.79838	3.96984	2.24776	2.4829	3.86972	3.40747	2.75111	2.35172	3.0381	3.46787	4.06178	3.05476	3.76007	2.37599	6.8262	1.82055	3.02266	1.98562	3.57351	4.19597	3.02334	4.21125	2.78438	5.58872	4.61494	3.27655	2.99923	6.46717	4.70734	4.10087	1.42727	3.10284	3.69322	3.5474
8860					874.695	671.164	0.0387568	0.0511333	0.0314747	0.0785649	0.0088075	0.0224378	0.0339725	0.0207751	0.0621772	0.0809494	0.0459836	0.103426	0.0668336	0.0599425	0.0252634	0.0936215	0.0273477	0.0686412	0.0140079	0.0161141	0.0475116	0.029669	0.0198965	0.0151457	0.0373475	0.0258006	0.0129214	0.0331489	0.0321411	0.0831882	0.00642377	0.0473998	0.0572704	0.0670947	0.0185097	0.0483876	0.0570385	0.0392499	0.0913069	0.0947867	0.0274477	0.0422087	0.0371962
7950					828.55	379.664	3.49937	12.9232	12.1622	13.3165	10.7647	15.1914	13.8125	15.6271	19.2057	18.4205	12.5619	9.24756	10.9896	18.1741	11.7648	13.3626	10.7077	9.56048	14.6339	17.442	13.1684	14.0095	12.9602	14.5751	11.2187	12.474	12.007	13.4293	12.8291	15.217	15.1929	13.8745	25.7507	19.457	15.5541	11.1572	20.6279	17.9582	12.2885	6.64718	11.8864	14.4557	14.9409
9942					950.813	695.609	0.710325	1.30063	0.166877	1.54486	0.659369	0.628845	0.894862	0.769314	1.77668	2.36401	0.435093	1.51607	1.52294	1.04888	0.682637	0.926591	0.752638	1.21514	0.764907	0.671148	1.01759	2.36954	0.694033	0.714765	1.22942	0.859589	0.796558	1.53928	1.13762	2.53376	0.629623	1.46217	1.59304	2.23989	0.899516	1.56723	1.47694	1.47166	1.17214	0.743178	1.04855	1.30892	1.3485
8467					854.567	406.019	0.223307	0.662306	0.681242	0.291712	0.449931	0.554302	0.637286	0.808701	0.815692	0.69322	0.925475	0.747107	0.733789	0.715857	0.903619	0.578449	0.64917	0.592575	0.686954	0.574087	0.646239	0.586812	0.589532	0.726742	0.507043	0.590207	0.576715	0.615549	0.520952	0.605134	0.861741	0.590336	1.02194	1.05551	1.0282	0.663345	0.89123	0.724	0.913506	0.435872	0.781193	0.714278	0.644908
8461					854.567	391.003	0.58499	3.55982	2.02353	2.08773	1.88888	1.57266	3.08063	4.07841	5.01139	2.57822	3.90987	2.30318	3.29852	4.56258	2.5318	1.93357	2.96504	2.92211	2.39873	4.04655	2.86691	2.34114	2.1219	3.06804	2.67845	3.22689	1.81454	3.68845	3.15303	3.21565	2.89432	3.24438	6.23833	5.54749	4.95461	2.20818	3.88663	2.89706	2.47634	1.51826	2.33653	3.17551	3.01952
10362					992.766	654.296	0.0198534	0.120981	0.0575254	0.0219319	0.0263182	0.0320995	0.0636895	0.0865119	0.334287	0.385716	0.453343	0.0769001	0.106831	0.124848	0.0423349	0.0465252	0.0444252	0.0519167	0.0423493	0.0454615	0.109192	0.111947	0.0735136	0.282405	0.0489562	0.0438225	0.0501686	0.12015	0.0765168	0.0920709	0.0707276	0.0906326	0.114289	0.236481	0.164474	0.092424	0.19037	0.14868	0.0804354	0.0294245	0.0617636	0.108963	0.106439
6462					746.597	498.299	3.09012	8.32709	5.8726	8.70863	6.06918	8.37602	7.07046	9.31168	8.6141	6.71353	9.66256	5.27227	7.91629	10.0569	7.86647	8.93379	7.03422	4.98503	7.37205	10.0717	7.56624	8.85075	5.73237	7.52655	6.49331	8.74145	6.64194	7.10217	7.89535	8.5521	7.69484	7.52519	12.3453	9.8221	7.70712	6.47003	11.0536	8.70034	7.70012	3.57838	7.15794	7.86454	7.05564
3041					488.336	49.2185	0.000506371	0.00456505	0.00172405	0.0128651	0.00820806	0.00956748	0.00391692	0.00441067	0.00739928	0.00309214	0.00831978	0.00152377	0.0107499	0.0113579	0.0095482	0.00201788	0.00696142	0.00566753	0.00453694	0.0115224	0.00642304	0.00331432	0.00315297	0.00234468	0.0083751	0.00183323	0.00946844	0.00841919	0.00438349	0.00860946	0.00446291	0.00348902	0.00837669	0.00137482	0.00493511	0.00366829	0.00494282	0.00198865	0.00546005	0.00234017	0.00735087	0.00491451	0.00364889
6825					768.581	441.362	0.695277	2.30027	3.20023	1.11771	1.6005	2.38089	4.33814	3.0548	5.06133	3.35386	4.51382	3.22513	1.74391	1.73163	3.00522	1.55822	1.90794	3.61263	2.9735	2.61882	2.69969	3.61243	1.87567	5.14702	1.05923	2.05661	1.45289	2.07127	1.83095	2.50783	5.00815	1.97167	5.42463	3.83211	1.37895	1.45087	4.77907	1.67348	3.46239	1.74055	2.47475	2.74053	2.87561
5451					684.546	453.493	0.0227914	0.00666181	0.0268011	0.0153827	0.0108774	0.0310152	0.0474422	0.0636242	0.0829713	0.0537559	0.132242	0.0522836	0.0219375	0.0373261	0.0215283	0.0171771	0.0172878	0.0258344	0.0277138	0.0258799	0.0370267	0.0319109	0.0191294	0.0468921	0.0115376	0.0266517	0.0230041	0.0128015	0.00493291	0.0306494	0.0221336	0.0272984	0.04201	0.0548331	0.0411619	0.0296608	0.034893	0.0257564	0.0309369	0.0121168	0.00694081	0.0267626	0.026151
6444					744.585	454.992	0.0872491	0.598772	0.392416	0.462776	0.679061	0.508291	1.50964	0.6405	0.557089	1.80012	1.70114	0.30413	0.257338	1.56546	0.807218	0.538106	0.377544	0.482478	0.674071	1.14983	0.754661	1.80056	0.514769	1.37883	0.207557	0.302676	0.25652	0.602477	1.46685	0.36004	1.39321	0.376437	0.92766	0.894189	0.880706	0.402273	2.91673	2.0751	1.06826	0.2601	0.502468	0.92937	0.866015
10216					976.923	760.923	0.125872	0.0758124	0.095834	0.131624	0.0739989	0.0709937	0.0514775	0.0744754	0.0791849	0.125391	0.0680792	0.158754	0.113526	0.0925214	0.0796703	0.125313	0.0683829	0.105029	0.0552885	0.0611937	0.0916211	0.129428	0.0618036	0.0611008	0.0720754	0.0731541	0.0563953	0.076988	0.0840896	0.160686	0.0430884	0.0868854	0.112524	0.0862497	0.0480457	0.118947	0.0852172	0.0773032	0.0731674	0.14646	0.0655665	0.0859588	0.0956068
7331					796.61	453.99	0.89798	2.87475	2.50618	2.03706	2.61701	2.31854	3.56268	3.40995	3.70146	3.96931	3.14778	1.74165	2.16807	3.103	3.1874	2.16334	2.03619	2.70472	3.00079	3.48625	2.73171	2.67626	2.58984	4.36578	1.56458	2.56894	2.00264	2.83217	2.76153	2.58045	3.47356	2.66903	4.66996	4.03311	2.88319	2.05883	4.72349	3.49883	3.74099	1.34008	2.82688	2.99301	2.78844
2068					384.308	64.1428	0.471595	0.170111	0.167434	0.501164	0.185985	0.0218071	0.0359973	0.0285401	0.0275016	0.00770257	0.017269	0.0339103	0.0315295	0.032219	0.038274	0.029245	0.0263958	0.0248117	0.0323212	0.0321454	0.0957979	0.92774	0.700268	0.101492	0.733863	0.117676	0.46494	0.0262226	0.0363679	0.0323584	0.0409188	0.0273054	0.045867	0.0364842	0.0340527	0.0333659	0.028406	0.0320309	0.0255205	0.0154187	0.0377978	0.174905	0.126794
8920					878.726	708.216	0.307061	0.546552	0.691716	0.965045	0.476142	0.507116	0.737624	0.479808	0.785325	0.806344	0.549294	0.973647	0.586742	0.489529	0.371147	0.573001	0.363835	0.708145	0.427931	0.385173	0.586559	0.675955	0.449734	0.507715	0.737508	0.45405	0.380334	0.695734	0.757528	1.30155	0.525436	0.940041	0.929881	0.741656	0.348504	0.696358	0.680791	0.72405	0.365825	0.718917	0.402557	0.651706	0.57837
10265					982.874	739.117	0.288045	0.216917	0.474364	0.251035	0.141597	0.162091	0.139251	0.156796	0.269558	0.564145	0.293679	0.381807	0.236646	0.233495	0.134912	0.129644	0.122739	0.195713	0.187275	0.129676	0.235469	0.406362	0.112664	0.189702	0.313051	0.132068	0.147952	0.293001	0.237932	0.46922	0.129131	0.214836	0.309614	0.346523	0.173485	0.334015	0.206574	0.239993	0.170101	0.173924	0.1693	0.238472	0.238394
10267					982.87	726.179	0.0575054	0.0859539	0.097072	0.0705584	0.0407326	0.0356787	0.0390648	0.0358436	0.0546521	0.135828	0.0916316	0.0415664	0.0605931	0.0677206	0.0329466	0.0260876	0.0108109	0.0334515	0.0413015	0.0328476	0.0545924	0.0950926	0.0274255	0.0470079	0.071031	0.0369719	0.029799	0.0785526	0.0784971	0.110476	0.0333487	0.0538695	0.0914613	0.0709891	0.0590385	0.0744784	0.0612209	0.0607397	0.0365054	0.0400969	0.045413	0.0601007	0.0658372
9202					894.754	664.101	0.114074	0.0523563	0.112377	0.00633994	0.0352916	0.048807	0.0627015	0.0459986	0.203871	0.45237	0.0821046	0.174495	0.0772415	0.102654	0.0691686	0.148681	0.0891137	0.179153	0.0507508	0.0527986	0.108017	0.00852557	0.0015967	0.0178062	0.0346563	0.0406771	0.0309428	0.039105	0.0831437	0.00483086	0.0244069	0.00259059	0.0578721	0.0826029	0.0457486	0.0776372	0.0710308	0.108868	0.0661928	0.284649	0.0713538	0.0577118	0.09526
6035					718.574	492.85	5.13843	28.3877	16.8695	20.3967	17.5391	21.9434	31.6624	29.9701	30.6598	28.5336	31.0875	26.7393	24.5998	34.1612	32.1311	25.5438	25.7014	28.5102	25.7099	32.5712	25.8928	44.9882	17.2937	24.8083	22.3803	22.7337	19.3019	31.0188	30.185	24.8185	37.6284	23.4342	47.9245	32.1157	27.6654	19.5191	47.7123	29.8071	33.2205	15.5663	28.571	29.0346	26.6632
10014					958.789	736.981	0.0619362	0.0973774	0.1097	3.60154e-05	0.0352414	0.0682024	0.127056	0.0441738	0.147903	0.403334	0.288254	0.142589	0.201592	0.0988272	0.0555428	0.0233306	0.0588698	0.0253917	0.048187	0.0406099	0.103908	0.175775	0.06661	0.235323	0.0480961	0.0161174	0.0567991	0.0455864	0.0873986	0.094012	0.065669	0.0382452	0.1327	0.144358	0.0568598	0.0769777	0.159122	0.0923969	0.141492	3.37397e-05	0.059064	0.0896318	0.0685171
10011					958.787	724.326	0.445991	0.682995	0.672455	0.527006	0.371849	0.351512	0.373669	0.36362	0.56091	1.06844	0.813888	0.301204	0.647286	0.634637	0.284117	0.235797	0.287486	0.380956	0.356898	0.350631	0.485567	0.779119	0.334595	0.45046	0.670025	0.331106	0.382462	0.715009	0.57468	0.841223	0.262543	0.513643	0.955067	0.636489	0.604036	0.594499	0.542485	0.670701	0.37615	0.295857	0.387418	0.545878	0.45817
10607					1020.79	654.827	0.00681492	0.058453	0.0252758	0.014622	0.0121162	0.00718598	0.0339669	0.0389309	0.170597	0.208075	0.25109	0.0335531	0.0605051	0.0746454	0.018184	0.0135288	0.0164051	0.0233016	0.0143377	0.0182351	0.0549912	0.0487495	0.0387143	0.173258	0.0234624	0.0131795	0.0204646	0.0588877	0.034367	0.0366323	0.0280815	0.039836	0.0513611	0.117199	0.112767	0.0411228	0.0963705	0.0771515	0.0388297	0.00948512	0.0339133	0.0546917	0.0547057
10611					1020.83	643.529	0.0410979	0.0913221	0.0312412	0.0930986	0.0818096	0.0737715	0.0569573	0.12243	0.0707133	0.00352389	0.12756	0.0675946	0.085205	0.0664116	0.0749253	0.0939465	0.0890778	0.127345	0.0335776	0.165175	0.0798392	0.125012	0.0555632	0.0597122	0.0242475	0.090367	0.0594849	0.0328392	0.104142	0.0289093	0.060118	0.0270189	0.0993936	0.0916618	0.0314744	0.06444	0.060271	0.0152821	0.074776	0.0692644	0.0391987	0.0606588	0.0829839
7770					818.568	440.464	0.413589	1.70725	1.47003	0.546338	0.974494	1.07197	1.84327	2.12403	2.75046	2.51604	2.2876	1.3099	1.41639	2.3171	2.17712	1.55335	1.51362	1.50928	1.71993	1.93547	1.65786	2.20648	1.64755	3.42373	0.921308	1.41182	1.35139	1.60973	1.66128	1.57592	2.67483	1.71339	2.48709	3.28772	2.36642	1.67797	3.79692	2.73961	3.71038	0.890556	2.02665	2.15904	1.85827
10358					992.795	621.415	0.0752424	0.185303	0.0716283	0.18245	0.207147	0.168398	0.130189	0.248815	0.161263	0.053194	0.216538	0.149884	0.179072	0.173039	0.196738	0.169491	0.151978	0.224326	0.0740598	0.24071	0.162973	0.280372	0.114657	0.122315	0.0910104	0.162191	0.148885	0.0927283	0.260306	0.062844	0.132783	0.0714165	0.179597	0.166054	0.106472	0.161484	0.12517	0.0510419	0.135104	0.133736	0.124023	0.136109	0.149717
3856					568.427	233.155	0.0283094	0.0602003	0.114045	0.0198672	0.0808354	0.0543902	0.100862	0.0510509	0.275661	0.256368	0.0603784	0.0806374	0.0439834	0.109055	0.0515216	0.0440322	0.0139901	0.104991	0.134404	0.0857633	0.0885173	0.166603	0.0859006	0.0807038	0.0651726	0.136488	0.14279	0.227513	0.0849258	0.318333	0.0902846	0.197739	0.18789	0.135381	0.0422025	0.112122	0.311603	0.156583	0.0695925	0.0568527	0.0781592	0.137342	0.0750369
3859					568.478	196.757	0.00198687	0.00251279	0.000245178	0.000362198	9.12766e-05	0.00142468	0.000114315	0.000155042	0.000506461	0.000864752	3.78662e-05	0.000261217	0.000181186	0.000104125	0.000141675	9.01838e-05	0.000201883	0.000248537	0.000373208	0.00073266	0.000531805	0.00401641	0.0117994	0.00432934	0.00742501	0.00147469	0.000646769	0.000101515	0.000387863	0.00992655	0.00017824	3.76689e-05	0.000967451	0.000466778	0.000634946	0.000100497	0.000651354	0.000130388	0.000262836	7.79265e-05	0.000436296	0.0022026	0.000950508
3151					502.373	85.9543	0.171274	0.127307	0.345353	0.494516	0.00923869	2.43069	1.68909	0.293385	0.447516	0.905363	0.196291	0.31506	0.512927	1.16075	2.21364	0.559978	0.171876	1.30422	0.409937	0.313809	0.703611	0.250063	0.158047	0.022207	0.264649	0.101896	0.0575129	1.63401	0.400616	0.62659	0.0314249	0.928071	3.8877	0.55149	0.977357	0.408918	0.945707	1.61199	0.922073	0.902292	1.34409	0.801335	0.65424
10283					984.89	751.824	0.159357	0.0979978	0.286728	0.118842	0.0734723	0.045323	0.0784656	0.0253248	0.134641	0.586687	0.287721	0.256908	0.144357	0.120753	0.0737848	0.0960862	0.0724488	0.100571	0.0971865	0.0551968	0.145593	0.457277	0.0422576	0.0627237	0.15081	0.0711751	0.0753332	0.233917	0.136014	0.278152	0.0546897	0.108002	0.140459	0.181173	0.0887581	0.1886	0.110762	0.107229	0.126476	0.107105	0.122395	0.142165	0.122861
4347					610.37	91.9036	0.0498791	0.324918	0.0569792	0.324057	0.238592	0.203805	0.0878616	0.239413	0.238762	0.0627144	0.241931	0.0781452	0.169357	0.169154	0.131245	0.250151	0.171967	0.133383	0.0635925	0.238512	0.173721	0.195895	0.15145	0.147254	0.120919	0.258535	0.157864	0.099594	0.395665	0.0669513	0.185732	0.110401	0.225952	0.2223	0.174413	0.120177	0.133016	0.034591	0.132781	0.0623511	0.106989	0.155141	0.160257
10464					1002.85	721.453	0.169941	0.250538	0.919402	0.173289	0.104375	0.140378	0.207535	0.175553	0.316604	0.64974	0.415832	0.385804	0.334587	0.283844	0.179244	0.0953891	0.109032	0.273725	0.190248	0.12723	0.275114	0.293522	0.130155	0.239553	0.370711	0.162734	0.125607	0.369443	0.202434	0.610418	0.146417	0.247226	0.306408	0.381219	0.242393	0.379288	0.24126	0.285664	0.0982411	0.151759	0.17074	0.25776	0.230411
10463					1002.84	692.568	0.0469072	0.165873	0.0501934	0.061253	0.0509861	0.0365315	0.0982083	0.103359	0.234363	0.37701	0.346074	0.0992305	0.287828	0.0668637	0.0786471	0.0545974	0.0515142	0.123747	0.0664608	0.0677803	0.123371	0.158499	0.0354834	0.189131	0.056465	0.0717491	0.0491906	0.2019	0.0442819	0.161843	0.080274	0.155156	0.325899	0.167007	0.264683	0.150969	0.140238	0.178129	0.0938137	0.0488102	0.0892001	0.133136	0.128386
10512					1008.89	740.635	0.149944	0.114038	0.192861	0.114754	0.0602065	0.0735482	0.0588675	0.0799478	0.0976615	0.247802	0.123465	0.134641	0.108721	0.113121	0.0703531	0.0564846	0.0585486	0.0858371	0.0945904	0.06193	0.104866	0.205472	0.0499711	0.0754744	0.15753	0.0565724	0.0749123	0.151116	0.126843	0.203918	0.0526129	0.0998454	0.180232	0.171407	0.113294	0.159691	0.121154	0.148584	0.0611793	0.0708452	0.071837	0.117625	0.108164
10510					1008.81	721.319	0.0600157	0.10057	0.161998	0.037376	0.0303346	0.062215	0.0712178	0.0791063	0.12367	0.185337	0.139916	0.1075	0.132452	0.0987342	0.0627247	0.029627	0.051117	0.0710329	0.073133	0.00570003	0.0841889	0.107797	0.0479848	0.0962764	0.123194	0.0498022	0.0580827	0.130509	0.075059	0.13297	0.0643256	0.0867677	0.196819	0.174684	0.123394	0.123603	0.0884789	0.113472	0.0509732	0.0239288	0.0393994	0.0953761	0.090298
8206					840.561	389.971	0.00677137	0.125076	0.068992	0.152858	0.103664	0.0988392	0.203813	0.149753	0.255942	0.22126	0.189541	0.126695	0.151588	0.0592821	0.0274115	0.0812801	0.251517	0.126557	0.144514	0.159552	0.135245	0.173192	0.102842	0.120514	0.250141	0.131362	0.0772248	0.26648	0.14049	0.142232	0.284835	0.108673	0.535259	0.209422	0.306259	0.151518	0.284632	0.185903	0.0324913	0.0816039	0.0230374	0.180406	0.143952
10251					980.859	724.578	0.400749	0.566886	0.625808	0.492863	0.285382	0.276496	0.346434	0.305632	0.628237	1.25951	0.913197	0.403216	0.697542	0.598024	0.29403	0.251106	0.26849	0.431296	0.33265	0.330971	0.485426	0.752861	0.312925	0.389569	0.670951	0.297764	0.310862	0.741973	0.490748	0.879167	0.229868	0.450861	0.902272	0.64887	0.524126	0.617101	0.5347	0.668407	0.353676	0.340719	0.359835	0.523863	0.465636
4519					624.62	574.274	0.156104	0.729175	0.303894	0.519293	0.484336	0.68203	0.563984	0.898771	1.21882	1.0924	1.10353	0.569393	0.800053	1.43171	0.884483	1.00403	0.722859	0.573116	0.865986	1.21537	0.790967	0.831884	0.732306	0.666005	0.560474	1.00233	0.561708	0.637704	0.865046	0.535638	0.712267	0.828353	0.978825	0.968909	0.500092	0.584088	0.989814	1.00931	0.940509	0.340845	0.813404	0.752976	0.731264
6497					748.585	488.249	0.535822	3.61794	2.84091	3.29654	4.48843	3.71274	6.8792	3.85241	4.11136	3.03732	6.63885	6.00975	3.00992	6.4867	3.80762	5.20876	2.80945	2.12022	3.81929	3.79592	4.00396	7.05205	5.24907	5.21498	2.54803	4.7681	4.1294	3.43537	4.44359	6.84807	4.91867	3.48684	8.10584	7.80476	4.53671	3.31183	7.15169	7.36117	7.67541	3.14909	3.07967	5.21352	4.07813
6498					748.585	476.908	0.384112	2.65661	1.36318	1.36757	3.42539	1.89667	1.88896	2.99471	2.43408	1.2276	1.70569	2.11034	3.80034	2.66765	2.75935	4.11914	1.24789	0.981385	2.04811	1.24527	2.1162	4.09655	1.84861	3.17405	1.81857	2.10925	2.54157	1.4153	1.75948	2.19564	2.11352	1.5545	4.53914	1.77031	1.7757	1.17529	3.0594	1.61864	2.29005	0.938707	1.44873	2.16215	1.41977
[truncated: 8,568 more rows]
[truncated: 5 more columns]
