# Supplementary material for: A comparative lipidomic study of the human placenta from women with or without gestational diabetes mellitus
Source: Royal Society of Chemistry journal article supplement (doi:10.1039/d2mo00083k), 2022-04-23
Supplement: d2mo00083k2.xlsx [file d2mo00083k2.xlsx]

## Sheet: Mean
Header	Description
id	The unique data number of the substance in this qualitative analysis
MS2 name	The substance name obtained by qualitative matching analysis of secondary mass spectrometry
MS2 score	The score of the second-level match is [0, 1], the larger the better
MS1 name	For the name of first-level fragment ion matching, refer to HMDB database
MS1 ppm	The accuracy of the first level match, the value is (-25, 25), as close to 0 as possible
mzmed	Material characteristics Mass charge ratio of ions
rtmed	Chromatographic retention time of the substance
id	MS2 name	MS2 score	MS1 name	MS1 ppm	InChIKey	mzmed	rtmed	GDM1_neg	GDM2_neg	GDM3_neg	GDM4_neg	GDM5_neg	GDM6_neg	GDM7_neg	GDM8_neg	GDM9_neg	GDM10_neg	GDM11_neg	GDM12_neg	GDM13_neg	GDM14_neg	GDM15_neg	GDM16_neg	GDM17_neg	GDM18_neg	GDM19_neg	GDM20_neg	Mean GDM	NC1_neg	NC2_neg	NC3_neg	NC4_neg	NC5_neg	NC6_neg	NC7_neg	NC8_neg	NC9_neg	NC10_neg	NC11_neg	NC12_neg	NC13_neg	NC14_neg	NC15_neg	NC16_neg	NC17_neg	NC18_neg	NC19_neg	NC20_neg	Mean NC
1463	FA(20:0)	1			VKOBVWXKNCXXDE-UHFFFAOYSA-N	311.295	311.738	0.0289856	0.0824931	0.0482175	0.0716661	0.0511093	0.0822776	0.0908095	0.0677961	0.0942236	0.100047	0.104844	0.0491458	0.0712838	0.11159	0.0675017	0.0891371	0.0617243	0.0563787	0.0749368	0.151946	0.0778057	0.111751	0.0739475	0.0812313	0.0706507	0.093875	0.0731058	0.0851972	0.0926249	0.0819558	0.0669977	0.0821827	0.0603136	0.148585	0.0784371	0.0692466	0.129402	0.124269	0.0826065	0.0337676	0.0631168	0.0851631
1449	FA(20:1)	1			BITHHVVYSMSWAG-MDZDMXLPSA-N	309.28	248.732	0.0301089	0.127192	0.101062	0.106522	0.0653916	0.109904	0.0912	0.162713	0.182651	0.162372	0.226841	0.157897	0.117334	0.138908	0.143103	0.150199	0.11713	0.0987311	0.114238	0.256661	0.133008	0.117181	0.0679644	0.0770463	0.0947567	0.175388	0.112705	0.108449	0.0909446	0.0991774	0.0994108	0.0785792	0.029406	0.490198	0.133309	0.0747451	0.158448	0.121638	0.130741	0.0526535	0.122762	0.121775
1242	FA(18:0)	1			QIQXTHQIDYTFRH-UHFFFAOYSA-N	283.264	241.112	1.33372	3.39076	2.33759	2.8426	2.46276	3.23901	3.86572	3.32444	3.38714	3.34995	4.50839	2.6744	3.25691	4.27411	3.61526	3.63441	3.27952	2.71654	3.10494	4.76702	3.26826	3.6646	3.39779	3.08843	2.87396	3.36491	3.14289	3.02646	3.36585	3.181	3.07419	2.5889	2.71388	4.69857	3.05614	2.70145	5.12339	4.55227	3.50043	1.56942	2.98403	3.28343
1430	FA(20:2)	1			XSXIVVZCUAHUJO-HZJYTTRNSA-N	307.264	197.141	0.0529215	0.283561	0.0801521	0.290654	0.188005	0.273281	0.245264	0.316845	0.321415	0.396417	0.598921	0.202427	0.273017	0.40325	0.335892	0.351792	0.284884	0.205645	0.256271	0.617971	0.298929	0.279657	0.177401	0.164698	0.203458	0.30797	0.271744	0.216252	0.316367	0.218814	0.24839	0.16438	0.202349	0.564903	0.304138	0.177473	0.465592	0.414528	0.305772	0.147925	0.261853	0.270683
1234	FA(18:1)	1			UWHZIFQPPBDJPM-FPLPWBNLSA-N	281.249	183.88	1.037	3.40804	2.23562	3.50239	1.8035	2.30799	2.70554	4.10441	5.32887	4.76999	5.80669	5.06147	5.09557	4.31438	6.10221	6.04915	4.26908	3.51181	4.45862	7.36914	4.16207	2.91931	2.03183	1.73112	3.05027	4.39531	3.07082	2.4562	2.42814	2.49484	3.37703	2.25501	1.4335	5.52824	2.54988	2.09578	5.16944	3.30209	4.28822	2.08348	3.40641	3.00335
1302	FA(19:1)	1			YOKHLRHWEXTWJR-ZHACJKMWSA-N	295.264	176.805	0.0548478	0.169616	0.0519844	0.139033	0.126605	0.0952641	0.0598828	0.217742	0.176136	0.0427483	0.244611	0.14429	0.174774	0.14927	0.163519	0.156969	0.0899765	0.165305	0.0634526	0.241827	0.136393	0.16543	0.133671	0.144474	0.0845873	0.135556	0.147899	0.0705402	0.184972	0.0604564	0.123439	0.0658494	0.075936	0.164428	0.0881806	0.105357	0.116572	0.0456434	0.175009	0.112119	0.130537	0.116533
1654	FA(22:4)	1			IGFLWIHPPADNDL-GFRMADBLSA-N	331.264	175.217	0.451765	2.68636	2.21433	2.27841	1.34444	2.32008	3.80917	3.91556	4.35274	4.29685	5.4586	4.30426	3.84606	3.90648	3.62831	2.55985	3.36905	2.6318	3.2597	6.47146	3.35526	1.98104	1.5769	1.86382	2.45569	3.20612	2.04054	2.13217	2.20174	2.55339	2.43927	1.94098	2.33617	5.73102	2.3339	1.64288	3.74834	3.36455	2.94212	1.40643	2.0727	2.49849
1384	FA(20:4)	1			YZXBAPSDXZZRGB-CGRWFSSPSA-N	303.232	173.434	0.147991	0.339084	0.2396	0.294588	0.263591	0.350128	0.34355	0.440725	0.584256	0.417579	0.391836	0.352715	0.316063	0.396579	0.615083	0.615782	0.426327	0.358164	0.431145	0.659216	0.3992	0.304914	0.245246	0.233292	0.332851	0.485587	0.372201	0.262797	0.269646	0.290208	0.315358	0.278783	0.33566	0.461428	0.315062	0.237985	0.780647	0.364191	0.348983	0.237633	0.340687	0.340658
1626	FA(22:6)	1			MBMBGCFOFBJSGT-SFGLVEFQSA-N	327.232	140.749	0.0175226	0.114001	0.0171806	0.0341735	0.035925	0.0424365	0.0961935	0.11845	0.169229	0.153945	1.44659	0.110403	0.0894934	0.14173	0.120509	0.104454	0.085992	0.0695311	0.0872617	0.153751	0.160438	0.0656938	0.0460349	0.0849838	0.0576313	0.0831424	0.0787742	0.0617955	0.0644335	0.0497122	0.110216	0.389489	0.0623975	0.162186	0.0963533	0.048515	0.139584	0.118494	0.14633	0.0316085	0.077865	0.098762
1172	FA(17:1)	1			FJMPAYNWWWCODA-KHPPLWFESA-N	267.233	121.993	0.0792238	0.28362	0.101228	0.158339	0.21975	0.132483	0.0905864	0.298726	0.238103	0.0659927	0.328763	0.16862	0.250072	0.232583	0.254366	0.183144	0.142999	0.259635	0.0971599	0.264376	0.192488	0.217672	0.183235	0.195404	0.177734	0.198487	0.223409	0.143473	0.303075	0.099445	0.180461	0.118127	0.117241	0.194644	0.156818	0.168826	0.185353	0.0677551	0.248055	0.137472	0.269356	0.179302
6662	SHexCer(d35:3)	0.999992			HFPULUPQAOSORJ-FNUNVXLFSA-N	788.514	366.165	0.131147	0.685439	0.652692	0.797489	0.425133	0.731611	0.769917	1.04416	1.03021	1.15828	0.833711	0.444009	0.5026	0.980745	0.647468	0.647673	0.38853	0.278487	0.656869	1.00821	0.690719	0.418043	0.848666	0.957806	0.350964	0.410861	0.44	0.649392	0.90569	0.515767	0.935845	0.71416	0.539421	1.12727	1.14299	0.609277	1.09414	1.01085	0.614924	0.187741	0.468279	0.697104
9438	SHexCer(d50:0)	0.999984			GULOTWMFXOLHLZ-UHFFFAOYSA-N	1004.8	631.221	0.00722893	0.0339861	0.00304431	0.0151468	0.0395993	0.0266906	0.0112117	0.0483819	0.0329257	0.00101713	0.0299996	0.034226	0.0324507	0.0214736	0.0323428	0.0381451	0.0175686	0.0240051	0.00253882	0.0358656	0.0243924	0.0751058	0.0190866	0.0244241	0.00954984	0.0282948	0.0289944	0.00281411	0.0221996	0.00533137	0.00991844	0.00240715	0.00882416	0.0172164	0.00991743	0.0228228	0.0105495	0.00122827	0.0278805	0.0102434	0.00904265	0.0172926
9185	SHexCer(d48:0)	0.999978			DKBFKQBWLXMTPR-UHFFFAOYSA-N	976.738	580.723	0.208174	0.853598	0.334482	0.602428	0.825181	0.781789	0.413185	0.879751	0.649548	0.187439	0.704594	0.496529	0.636545	0.542734	0.676191	0.599819	0.616408	0.621286	0.295498	0.931646	0.592841	0.527341	0.506872	0.343209	0.506846	0.461607	0.464178	0.321342	0.974174	0.214088	0.422781	0.329087	0.310394	0.585339	0.355271	0.497933	0.398128	0.156366	0.356954	0.336081	0.508596	0.428829
9640	SHexCer(d52:2)	0.999961			IJHKYHFYEIUYNL-IFLFXUNCSA-N	1028.77	596.836	0.152391	0.351396	0.252819	0.333672	0.188011	0.25726	0.260541	0.798986	0.456974	0.16001	0.743396	0.34889	0.595981	0.559523	0.639556	0.236035	0.439782	0.154126	0.069374	0.421947	0.371034	0.464878	0.340016	0.372075	0.193543	0.17922	0.208091	0.138234	0.756402	0.0778913	0.278945	0.167057	0.14286	0.31234	0.468498	0.464187	0.332473	0.0699585	0.4494	0.0778213	0.220419	0.285715
9539	SHexCer(d51:1)	0.999854			ZIDBSUHHCCOGTD-FCQUAONHSA-N	1016.8	643.615	0.570925	1.09551	0.488644	1.2109	1.0089	1.25156	0.819144	1.73722	1.08522	0.289533	1.48802	1.0095	1.36952	0.898638	1.25696	1.46345	1.09127	1.40786	0.446999	1.6377	1.08137	1.63888	0.679447	0.869478	0.573601	1.07679	0.796282	0.516655	1.64834	0.426405	0.814085	0.349017	0.508159	1.08038	0.643029	0.925074	0.670022	0.320604	0.755577	0.943907	0.674937	0.795534
9723	SHexCer(d53:3)	0.999854			NTPVMGIGYWLPCK-GXKYABPLSA-N	1040.8	635.714	0.114281	0.288956	0.120434	0.357017	0.279983	0.370007	0.211575	0.47234	0.322251	0.0744023	0.411643	0.338384	0.362478	0.233992	0.283905	0.489208	0.369577	0.306283	0.136302	0.362822	0.295292	0.557581	0.18381	0.184416	0.180676	0.228493	0.306207	0.0976356	0.396794	0.0817185	0.239543	0.120755	0.126443	0.276205	0.17231	0.229148	0.195719	0.0523519	0.359936	0.204188	0.137978	0.216595
9668	SHexCer(d52:0)	0.999854			ARKZQBXBYFURCA-UHFFFAOYSA-N	1032.8	629.105	0.480611	1.28904	0.476979	1.55448	1.23495	1.67882	0.664689	1.87357	1.34122	0.347648	1.91618	0.813222	1.28459	0.935953	1.08338	1.2531	0.948912	0.976003	0.474688	1.62607	1.11271	1.2409	0.870256	0.72115	0.620554	0.847722	1.01212	0.503277	1.48102	0.371858	0.66934	0.472459	0.563976	0.997092	0.60049	1.05711	0.639557	0.273277	0.740385	0.734349	0.679191	0.754804
9527	SHexCer(d51:2)	0.999854			IRYFFUIKJWCXLZ-XUQDTYRNSA-N	1014.79	621.777	0.421423	1.03593	0.392725	1.04382	1.01479	1.0105	0.749573	1.08193	1.14287	0.273402	1.50057	0.959996	1.05411	0.694155	1.15227	0.940815	0.919453	0.912313	0.41806	1.53361	0.912616	1.09118	0.754239	0.490005	0.445039	0.931859	0.849656	0.378714	1.25137	0.352056	0.599534	0.483385	0.582768	0.926521	0.751259	0.868682	0.507909	0.284405	0.882584	0.754534	0.76812	0.697691
9506	SHexCer(d51:3)	0.999854			MTJOHENXKIQIGF-LEAWIUQMSA-N	1012.77	612.078	0.291134	0.990514	0.470801	0.509089	0.608984	0.793997	0.560765	1.16119	0.885049	0.254392	1.13741	0.889087	0.805117	0.758241	1.01554	0.817625	0.876519	0.793432	0.345383	0.937826	0.745105	1.39054	0.665816	0.683028	0.519556	0.715059	0.658456	0.447861	1.33795	0.340173	0.64203	0.382006	0.396606	0.778503	0.717357	0.951095	0.553486	0.174912	0.789887	0.528733	0.587341	0.66302
9655	SHexCer(d52:1)	0.999854			KLFNEWJDKKAIHU-VHXPQNKSSA-N	1030.78	608.125	0.363374	0.91752	0.37525	0.868587	0.746268	0.896924	0.487145	1.37003	0.760169	0.220053	0.997995	0.48535	0.831253	0.597301	0.819478	1.02298	0.591854	0.656025	0.39759	1.36525	0.73852	0.720283	0.590574	0.474734	0.386621	0.620276	0.583834	0.333857	1.04876	0.287588	0.522092	0.344075	0.389886	0.66876	0.542107	0.740651	0.475644	0.186054	0.507931	0.423229	0.458985	0.515297
9272	SHexCer(d49:2)	0.999854			AMQIXOWXDYAEBF-USGWXJRWSA-N	986.759	597.853	0.450931	1.17936	0.514721	0.863522	0.918152	0.613777	0.608457	1.00646	0.773043	0.267373	1.07915	0.846971	1.04985	0.841067	0.936054	0.716415	0.634577	0.918964	0.425217	1.02174	0.783291	1.02501	0.616373	0.633618	0.589113	0.828111	0.667406	0.507653	0.961319	0.351478	0.610285	0.462083	0.486616	0.813856	0.662987	0.728424	0.654512	0.224262	0.684367	0.525007	0.742378	0.638743
9250	SHexCer(d49:3)	0.999854			TYLTZLWIXAPZEC-RCFBXWIUSA-N	984.742	586.477	0.237957	0.892066	0.270096	0.361693	0.519474	0.539465	0.453282	0.666584	0.659144	0.193158	0.924099	0.530875	0.596532	0.659978	0.681274	0.516761	0.753072	0.668391	0.260849	0.621969	0.550336	0.880336	0.47413	0.445048	0.564108	0.441937	0.503632	0.400585	1.05989	0.235203	0.463028	0.334883	0.333127	0.472134	0.547687	0.699878	0.539865	0.145058	0.614922	0.378776	0.649129	0.509168
9424	SHexCer(d50:1)	0.999854			CJNKGJHMQDDCMY-DQRAZIAOSA-N	1002.75	581.742	0.223574	0.736074	0.294766	0.618756	0.579363	0.559264	0.328602	0.762294	0.592912	0.16002	0.678772	0.422804	0.590392	0.43947	0.622501	0.721124	0.422791	0.474624	0.30455	0.782087	0.515737	0.497479	0.375181	0.272231	0.393181	0.464595	0.461775	0.269973	0.649694	0.192811	0.365999	0.294335	0.244259	0.5228	0.323632	0.440912	0.392686	0.138131	0.316923	0.296364	0.413165	0.366306
9626	SHexCer(d52:3)	0.999854			MXAUGHUNODBSBT-UNAUSCAUSA-N	1026.75	572.453	0.0802662	0.479216	0.171584	0.211063	0.210686	0.209583	0.148998	0.515815	0.326637	0.096162	0.403608	0.261402	0.340588	0.274915	0.427091	0.330582	0.227525	0.226074	0.121814	0.331891	0.269775	0.306344	0.219716	0.209854	0.263619	0.200979	0.188051	0.149083	0.430717	0.0609171	0.2488	0.119702	0.0884368	0.331487	0.294766	0.309735	0.168668	0.0459018	0.284186	0.123281	0.265694	0.215497
7056	SHexCer(d37:3)	0.999854			ZEGOGXVJEQBAJT-RZRQIOJCSA-N	816.503	423.233	0.0756153	0.183642	0.156288	0.0638575	0.134524	0.167923	0.215303	0.158639	0.269908	0.172522	0.178925	0.233003	0.180666	0.179311	0.158512	0.110298	0.266265	0.19077	0.16644	0.137765	0.170009	0.182634	0.189038	0.231986	0.196031	0.150311	0.182051	0.19574	0.193918	0.189833	0.194741	0.197414	0.201408	0.17922	0.207464	0.18323	0.175433	0.152733	0.209438	0.134322	0.211773	0.187936
7083	SHexCer(d37:2)	0.999854			UJKHYFCTZZJTGP-XUXRLMLDSA-N	818.555	277.774	0.107615	0.323787	0.156791	0.296481	0.273184	0.171265	0.260957	0.2154	0.144109	0.0494675	0.271997	0.258914	0.174859	0.164385	0.173739	0.304336	0.329355	0.15108	0.1306	0.206265	0.208229	0.417721	0.18305	0.165963	0.165693	0.196335	0.24063	0.0890465	0.334781	0.156573	0.0774159	0.327305	0.103441	0.142878	0.145559	0.192116	0.142277	0.237149	0.177886	0.102772	0.130488	0.186454
4908	SHexCer(d26:2)	0.999854			YCJHELNJPQGILF-XWJBZUNASA-N	664.384	101.802	0.0843885	0.323359	0.115652	0.279782	0.216648	0.172496	0.124446	0.295264	0.257945	0.0838932	0.280795	0.0933921	0.166607	0.173674	0.150923	0.271332	0.193088	0.131532	0.109368	0.246436	0.188551	0.238202	0.262536	0.249183	0.179676	0.390813	0.243932	0.183576	0.297049	0.127883	0.238892	0.221739	0.200236	0.314029	0.325002	0.179143	0.231455	0.107764	0.229834	0.0891409	0.233911	0.2272
3798	LPC(18:1)	0.989332			YAMUFBLWGFFICM-SEYXRHQNSA-N	566.336	80.6019	0.0134182	0.0576383	0.00648578	0.050751	0.0485432	0.0131919	0.0433381	0.0426508	0.0700391	0.0706579	0.107226	0.00109608	0.0311706	0.0758945	0.0510186	0.1057	0.0168437	0.0259296	0.0502452	0.0830941	0.0482466	0.0296579	0.0130363	0.00922486	0.0275671	0.0202275	0.0195	0.0742251	0.0334383	0.0211721	0.0622815	0.0469071	0.0537286	0.0506119	0.0740069	0.0224217	0.160352	0.0639656	0.0778165	0.00391511	0.0323298	0.0448193
3562	LPC(16:0)	0.986744			ASWBNKHCZGQVJV-UHFFFAOYSA-N	540.331	97.4049	0.892461	5.61921	3.37852	3.45797	3.62294	6.05566	6.0985	9.26307	10.8093	5.54572	11.0023	3.24683	6.05551	8.13093	7.95713	14.1354	6.6829	4.92395	7.13121	15.6355	6.98225	5.27162	3.63177	4.79496	2.70782	7.07374	3.43005	7.1213	8.0868	4.82483	7.13912	6.44779	6.07243	6.83957	7.76756	4.94263	13.428	5.36807	9.19613	1.82588	5.80914	6.08896
6315	PE(18:2/20:4)	0.985138			VFHZIDQZQBGNBH-DMQHYRIXSA-N	762.506	379.057	2.0326	6.26355	6.35744	8.16234	5.5081	9.29058	10.3505	8.61378	10.535	11.2978	8.39146	3.74056	4.88129	11.1958	5.82613	9.25527	5.20199	4.32002	8.75943	11.5143	7.5749	5.97197	7.65923	7.99398	5.62285	4.7546	6.2077	8.47592	9.06355	8.12078	7.83496	9.12307	7.35424	10.8401	7.4389	5.36013	17.6475	14.6604	6.0355	2.6377	5.22817	7.90157
11135	GM3(d57:0)	0.983559			AJDFKEWKQQZYCH-UHFFFAOYSA-N	1476.06	481.874	0.00574468	0.0569246	0.025452	0.0357968	0.0519481	0.0358333	0.0450223	0.0453917	0.0508338	0.0398503	0.0505932	0.0276781	0.0443745	0.047073	0.0453444	0.0411294	0.033557	0.0407966	0.0526866	0.0730455	0.0424538	0.0478309	0.035287	0.0548109	0.0356688	0.0398302	0.0373532	0.0527138	0.0361777	0.0163849	0.0651375	0.0359497	0.0241298	0.060971	0.0396064	0.0368019	0.056446	0.0517551	0.0232513	0.0103027	0.0517997	0.0406104
4077	LPC(20:3)	0.979398			XUDGAAFUMTTZCO-QNEBEIHSSA-N	590.346	84.5827	0.0315886	0.203173	0.0666749	0.113631	0.156157	0.0986752	0.290381	0.331758	0.421033	0.199195	0.411816	0.118892	0.307162	0.469059	0.248713	0.418313	0.17706	0.177726	0.228318	0.335814	0.240257	0.189336	0.184698	0.247625	0.0939979	0.183564	0.106989	0.418487	0.263009	0.175412	0.38761	0.219757	0.2849	0.217058	0.480033	0.192284	0.481055	0.240051	0.425951	0.0572028	0.195157	0.252209
7460	OxPC(16:0/20:3+1O(1Cyc))	0.978394			CDBZOUAKOSUWCH-ILTQFSIESA-N	842.556	345.571	0.0780103	0.547078	0.0793403	0.235573	0.474854	0.217771	0.0988088	0.229258	0.167019	0.0834871	0.562793	0.231467	0.184414	0.119811	0.162853	0.158261	0.384034	0.129298	0.0492376	0.215281	0.220432	0.132981	0.369213	0.219365	0.12597	0.481545	0.154263	0.0804413	0.269195	0.0317575	0.208819	0.116714	0.129722	0.109527	0.33589	0.143601	0.101622	0.0401845	0.134241	0.0994918	0.153729	0.171914
5676	PG(16:0/16:0)	0.975206			BIABMEZBCHDPBV-UHFFFAOYSA-N	721.491	311.101	0.000193963	0.00436616	0.000552209	0.00561227	0.00300016	0.00148777	0.00409998	0.00248302	0.0090698	0.00219964	0.00335069	0.000928029	0.00169217	0.0012678	0.00261872	0.00606448	0.00177195	0.00222935	0.000630833	0.00896747	0.00312932	0.00578678	0.00161065	0.00210735	0.00327632	0.0136995	0.00248516	0.00162281	0.00367067	0.00177804	0.00361111	0.00295375	0.00140247	0.00556762	0.00262293	0.00185605	0.00179944	0.00109547	0.00294574	0.000594113	0.00223259	0.00313593
6360	PE(18:0/20:4)	0.974899			YEHAZLUVAZKVRO-ZKVKLVECSA-N	766.537	459.737	30.7187	81.9261	69.739	79.1674	80.3956	101.121	93.7356	81.3895	112	89.9776	95.3956	65.9013	63.2352	90.7377	74.1251	76.0005	77.6744	64.2528	79.1015	107.428	80.7011	82.4508	77.1907	86.0585	63.5568	72.4922	72.6393	93.775	97.8654	92.8146	89.4395	91.7858	81.737	102.132	75.3621	68.7606	105.446	105.852	75.5417	47.0204	71.9025	82.6911
7630	PC(18:0/20:4)	0.974139			HAKKEJDMTIQLJH-WKUHSSGJSA-N	854.589	466.184	21.0763	45.2918	39.6333	47.0561	42.7936	52.2916	50.5816	43.4291	71.6393	52.254	58.513	43.3539	36.4688	53.5742	36.4675	41.1449	46.4674	43.6486	39.5917	46.5766	45.5927	48.3389	39.3782	54.1253	50.2754	48.6899	44.6383	61.8567	57.9276	52.795	46.8276	46.5973	47.2521	55.1979	45.2118	44.8174	58.1353	52.8378	46.6625	36.0648	36.8978	48.7264
8074	PC(16:0/24:4)	0.973409			BWWPCEQBECUHNF-LTFXTMEVSA-N	882.508	481.457	0.0269259	0.0536908	0.0641319	0.0613204	0.0545404	0.0484129	0.0426386	0.0626935	0.0303645	0.224926	0.0696291	0.0900376	0.046689	0.061852	0.0660146	0.0820776	0.0548799	0.0739688	0.0883246	0.095228	0.0699173	0.0461622	0.0559809	0.0912144	0.0505178	0.0584271	0.0440869	0.0621562	0.0732195	0.0661135	0.0658711	0.0527321	0.0580406	0.0765354	0.048056	0.0510441	0.0653875	0.0897084	0.0599628	0.0644749	0.0619457	0.0620819
5211	PE(16:0/16:1)	0.972954			CZOSTDZGCCEZTJ-PEZBUJJGSA-N	688.493	409.68	0.122597	0.698925	0.342812	0.78129	0.378719	0.314752	0.539855	0.470857	0.593767	0.331861	0.58231	0.381749	0.691593	0.719044	0.48713	0.795429	0.419395	0.453572	0.561938	0.655053	0.516133	0.680102	0.303378	0.264027	0.647583	0.636046	0.483465	0.588294	0.519578	0.441337	0.595983	0.601316	0.345016	0.862896	0.456902	0.428406	0.619968	0.579937	0.44435	0.399009	0.623383	0.526049
7576	PC(18:2/20:4)	0.971924			RUHBZJXWUDKAMZ-ODAJXHQSSA-N	850.484	330.019	0.0535729	0.0208828	0.00641068	0.0191391	0.0148547	0.0122423	0.00754735	0.0117858	0.0207016	0.00761184	0.021224	0.00300458	0.00528976	0.00323474	0.00569276	0.00718859	0.00444643	0.0447574	0.00657843	0.0187503	0.0147458	0.0244049	0.00778084	0.0165616	0.00582064	0.00938702	0.00467495	0.011894	0.0277195	0.0999841	0.0150865	0.110476	0.00461687	0.0116158	0.00672419	0.00175359	0.0154199	0.0166696	0.00291453	0.0441208	0.00820405	0.0222915
8016	PC(20:2/20:4)	0.970739			DWNZYUCWYBDRIX-WOVKMZFMSA-N	878.591	429.188	0.465455	1.09599	1.09045	1.01162	0.859025	1.19564	1.13706	1.12559	1.71384	1.44892	1.42049	1.14729	1.07486	1.52954	1.0766	1.03139	0.96589	0.845357	1.02806	1.31412	1.12886	1.0636	0.966877	1.22465	0.748149	1.6801	0.860383	1.28683	1.24009	1.14732	1.09884	1.54317	1.98598	2.00173	1.8045	1.15215	1.70287	1.27216	1.1483	0.983781	1.26561	1.30886
3787	LPC(18:2)	0.970683			SPJFYYJXNPEZDW-UTJQPWESSA-N	564.329	112.516	0.0130579	0.0620721	0.0171107	0.0299311	0.0504278	0.0421497	0.0298428	0.0582399	0.0494997	0.0198467	0.0874228	0.0196658	0.0390878	0.0409558	0.0413928	0.0682072	0.0334329	0.0269418	0.020798	0.0638909	0.0406987	0.0651547	0.0508782	0.0361868	0.0312704	0.0509489	0.0519004	0.0277202	0.0725728	0.0196244	0.0487097	0.0324023	0.035166	0.0551401	0.0675548	0.0382274	0.0517898	0.0202265	0.0597044	0.0181262	0.0390171	0.0436161
7427	PC(17:0/20:4)	0.97062			HTEFXTFZCGTMAC-PHEBCRHUSA-N	840.602	455.242	0.254021	0.765909	0.665434	0.456244	0.659122	0.587987	0.963892	0.796145	0.993077	0.975349	0.89738	0.491987	0.533201	0.794015	0.812106	0.540897	0.539872	0.695177	0.716954	0.9292	0.703398	0.658301	0.715287	1.14893	0.403	0.688822	0.485637	0.747065	0.740669	0.601198	0.896141	0.604757	0.563713	0.992961	0.76717	0.546422	1.03768	0.895939	0.980891	0.356435	0.758241	0.729463
5546	PE(16:0/18:3)	0.967409			QONZHKTZKTUIMU-SVNQLWEDSA-N	712.493	391.87	0.098023	0.557496	0.195315	0.598039	0.314595	0.419769	0.445997	0.451989	0.729119	0.452066	0.742609	0.153257	0.39312	0.764499	0.470892	0.654497	0.408675	0.292203	0.540342	1.00502	0.484376	0.632587	0.360647	0.376078	0.403977	0.314898	0.289899	0.501576	0.692271	0.335227	0.380691	0.461156	0.301781	0.534163	0.453007	0.322876	1.77832	0.873687	0.657426	0.156828	0.366651	0.509687
6799	PC(14:0/20:4)	0.962361			BXZPYXMUABUWBT-DRJPRSGJSA-N	798.529	361.701	0.382981	1.25076	0.472027	1.04855	0.815743	1.11098	1.22745	1.26566	1.47873	0.550054	1.04131	0.974386	1.10844	1.41098	1.13351	1.04808	0.957213	1.03547	0.682262	1.15718	1.00759	1.57345	0.94269	0.874374	1.08833	1.20015	0.873117	1.01918	1.23142	1.22703	0.890531	1.24095	1.20666	1.17957	0.860331	1.07733	1.33899	1.4842	0.899895	0.82345	0.773873	1.09028
7629	PC(18:2/20:2)	0.96108			ORELBRKCYWQHTL-HLWGYBLSSA-N	854.582	419.465	1.20011	3.02548	3.07779	2.57482	2.46341	3.00335	3.19261	3.39368	4.83869	2.7652	3.89356	2.91018	3.19326	3.22129	2.76609	2.9637	2.58418	2.27932	2.85658	4.01712	3.01102	2.73703	3.01241	3.04235	2.38072	3.81477	2.61697	3.44259	2.7981	3.27792	3.15855	3.57182	3.45884	4.21687	3.17156	2.34781	3.68902	2.9667	2.71794	1.81949	2.76538	3.05034
6526	PE(16:1e/24:4)	0.961007			MWCNZYYWFXRDLH-GKPKDRHFSA-N	778.577	523.564	1.87791	3.49176	4.07427	7.38987	4.10541	5.0719	5.40185	5.34066	7.27623	4.11401	5.34218	4.30523	3.99549	6.66774	4.25692	8.72417	5.00699	5.11064	4.92159	9.543	5.30089	7.0843	5.02062	6.4853	3.90634	6.97147	4.93785	6.13601	7.35076	6.84586	6.66521	6.38027	5.30064	9.75929	4.02986	5.1209	6.28183	11.1559	5.20332	4.41735	4.46218	6.17576
5351	PE(16:1e/18:2)	0.959144			RIQAKBUOHSSMTC-PNBIJBBKSA-N	698.512	445.538	2.0939	6.33445	4.57626	6.88788	5.65751	6.00968	7.6955	4.68985	5.70472	7.291	7.84959	3.39355	3.80872	8.79048	5.47726	6.22725	4.92808	5.23752	6.58693	7.41711	5.83286	9.84041	5.02846	5.03209	5.37694	4.54115	5.57628	6.76403	9.13917	5.52849	6.50433	5.41556	5.17373	6.25717	5.99086	6.06846	10.2651	10.496	6.12944	3.7529	5.85265	6.43666
3811	LPC(18:0)	0.958976			IHNKQIMGVNPMTC-UHFFFAOYSA-N	568.326	102.775	0.0477389	0.0255835	0.0166096	0.00942698	0.00673848	0.0199688	0.0215541	0.0487846	0.0566103	0.0303463	0.056744	0.006239	0.0321407	0.0440399	0.0418217	0.0604532	0.0311247	0.0151133	0.0456494	0.0759589	0.0346323	0.0188357	0.0156981	0.014493	0.00831189	0.0299217	0.0166135	0.0420825	0.024502	0.0265517	0.0341015	0.0301168	0.0330886	0.0395241	0.0551236	0.0196713	0.0942138	0.0279823	0.0547735	0.00268768	0.0266922	0.0307493
2889	LPE(18:1)	0.957186			PYVRVRFVLRNJLY-KTKRTIGZSA-N	478.283	77.767	0.0043534	0.0301481	0.00959502	0.0301033	0.0236423	0.0310417	0.0242604	0.0337326	0.0216553	0.0266185	0.0539179	0.0054863	0.0225585	0.0417553	0.03064	0.0495265	0.0164195	0.016224	0.0253593	0.0442059	0.0270622	0.0350059	0.0223828	0.0233315	0.0143152	0.0125652	0.0252283	0.0253213	0.0426353	0.0119449	0.0302226	0.0226037	0.0249661	0.0257698	0.0327511	0.0249405	0.0618171	0.0312458	0.0388705	0.00531857	0.0211574	0.0266197
6332	PE(18:1/20:4)	0.955261			ZYMZKMQPPJPQHY-HAGCXRLMSA-N	764.533	434.858	0.814189	1.65854	2.48712	3.98532	3.05345	3.3702	1.04473	3.35939	4.09443	3.44608	3.3248	2.07733	1.31684	4.18034	3.56196	3.82298	3.62968	2.98395	3.64893	5.34096	3.06006	1.97309	2.65414	3.4056	2.4159	2.56891	2.82007	3.32976	3.70694	4.02089	4.18096	3.33318	3.23303	3.71582	2.98828	2.82701	4.58618	5.1168	3.35888	1.88025	2.26134	3.21885
6128	PE(18:2e/20:3)	0.954526			KDKDOORFPQYZGM-LOYOHVQTSA-N	750.543	482.413	35.1736	102.064	96.2167	114.075	80.896	86.0546	106.007	90.7248	121.768	123.811	106.09	93.7308	97.1221	110.848	108.644	92.9669	84.2575	108.67	117.463	163.18	101.988	154.905	83.1519	137.624	84.5167	86.8533	82.5045	94.4305	99.0006	130.198	107.605	82.5049	79.0291	125.478	77.126	98.8016	113.648	137.598	100.531	65.5434	82.6443	101.185
6167	PE(17:0/20:4)	0.954185			CKWQBCHPEQMNNL-UMWXEKTDSA-N	752.522	422.653	0.0225924	0.322105	0.252626	0.169664	0.322734	0.448888	0.382721	0.375479	0.453229	0.281592	0.381761	0.242956	0.356076	0.363927	0.31274	0.26775	0.170739	0.157739	0.287595	0.283679	0.29283	0.242286	0.309026	0.297201	0.204567	0.252159	0.203976	0.169472	0.328363	0.24273	0.289293	0.2817	0.309499	0.346585	0.281259	0.176546	0.271162	0.388806	0.279175	0.0943163	0.236772	0.260245
5950	PE(16:0/20:4)	0.954092			NQIMLWFRWGTTOZ-JAXHXWBXSA-N	738.507	412.519	8.35564	32.1622	31.9176	41.1361	31.7303	55.2076	38.8025	45.5837	48.5524	38.8153	34.4992	27.5352	35.1793	56.7976	31.3979	36.1713	34.3674	26.3736	36.2275	57.1194	37.3966	32.837	33.154	34.1858	30.4406	28.0739	33.0846	45.1495	41.4565	35.4429	38.1031	40.9277	31.4358	48.4597	27.7892	32.9557	67.7071	47.6837	29.4229	19.9899	31.0822	36.4691
2877	LPE(18:2)	0.95403			DBHKHNGBVGWQJE-HZJYTTRNSA-N	476.241	50.0999	0.00100566	0.0160138	0.00212354	0.0165208	0.0122682	0.0146538	0.00538086	0.031579	0.015026	3.64446e-05	0.034012	0.00380845	0.00639782	0.0164695	0.0198944	0.0180534	0.00762434	0.0140138	0.00118333	0.0289748	0.013252	0.00865016	0.00681826	0.00557229	0.00507667	0.0126384	0.00588454	0.00487689	0.0384705	0.00355764	0.00809067	0.00382954	0.00528328	0.0133013	0.014447	0.01296	0.00827408	0.0186145	0.0168704	0.00417722	0.0186466	0.010802
6063	PE(18:3e/20:4)	0.953798			QIQGIECOBDSDSX-IVGDTRDPSA-N	746.513	423.251	9.41881	37.3606	31.5851	21.3726	25.6155	39.125	22.0692	32.8062	58.2979	42.4116	42.4867	37.877	31.4387	51.512	34.7646	35.0222	48.6396	32.4896	34.5556	41.3405	35.5095	54.276	37.1519	47.6749	40.0017	32.6278	33.6469	48.5188	50.1578	43.9534	24.5655	48.7817	38.921	42.8408	47.269	38.281	62.0165	51.2091	53.7276	22.251	43.5394	43.0706
8085	PC(18:0/22:4)	0.953074			WUIUYHXOIXOMHN-SHJNOZFHSA-N	882.624	517.457	0.259144	0.386651	0.53798	0.457435	0.377862	0.480309	0.413203	0.374297	0.596475	0.447464	0.518812	0.400577	0.358698	0.395438	0.283611	0.374539	0.53718	0.400878	0.428923	0.439262	0.423437	0.42534	0.362821	0.458205	0.318802	0.545826	0.372423	0.449992	0.511067	0.566076	0.439183	0.480506	0.418968	0.699641	0.473077	0.403904	0.603151	0.565339	0.396049	0.307219	0.374837	0.458621
6399	PG(18:2/18:2)	0.950387			AKWGRDPPGYFWIW-MAZCIEHSSA-N	769.503	317.411	0.0650967	0.273642	0.222165	0.245035	0.221802	0.309536	0.292029	0.311994	0.551568	0.339456	0.324693	0.385849	0.202025	0.334165	0.339944	0.343977	0.243607	0.196551	0.265703	0.607337	0.303809	0.373692	0.276171	0.286202	0.292782	0.365742	0.248297	0.481622	0.394385	0.269743	0.564819	0.384302	0.248542	0.501496	0.374389	0.216217	0.49953	0.423531	0.230782	0.119813	0.205148	0.33786
3057	LPE(20:3)	0.949979			UEONHLLDVDPRRN-PDBXOOCHSA-N	502.294	103.133	0.0152632	0.071035	0.0213267	0.046409	0.0501466	0.0404888	0.0349443	0.0402939	0.0455356	0.0236829	0.0621095	0.0271092	0.0449628	0.0837283	0.0457962	0.042212	0.0403994	0.0375963	0.0274924	0.068483	0.0434508	0.0701894	0.055105	0.0501531	0.0486894	0.0598369	0.0659983	0.0500516	0.0788808	0.042591	0.0481087	0.0409016	0.049291	0.0553974	0.082318	0.0465584	0.0681892	0.0317855	0.0738407	0.0178931	0.0520861	0.0543933
7547	PC(18:3/20:4)	0.94948			ASBDJSRXIBNAIL-ULCWQHCSSA-N	848.543	343.075	0.246008	0.886437	0.56213	0.449274	0.506913	0.577243	0.855008	0.927615	1.26292	0.716831	1.04161	0.440945	0.439438	0.907243	0.742988	0.739276	0.364481	0.796228	0.494283	1.1313	0.704409	0.636746	0.803824	0.658718	0.396929	0.45951	0.423813	0.87807	0.78755	0.735484	0.720166	0.758948	0.774309	0.768508	0.816198	0.53882	1.19918	0.896401	0.710803	0.255384	0.662291	0.694082
4690	FAHFA(18:0/24:1)	0.948323			HLBUGDHWLMEDGL-BZZOAKBMSA-N	647.584	522.435	0.494626	1.20652	1.07972	0.966689	1.05807	1.0266	1.08128	1.00162	1.00901	1.00917	1.12102	1.0046	1.08444	0.97051	0.985336	1.01214	1.02018	1.03665	0.983569	0.954278	1.0053	0.885375	0.936235	0.978105	1.06192	0.928417	1.03228	0.902567	0.989486	0.991408	0.9571	0.93449	1.0085	0.909817	0.993489	1.03402	0.928848	0.945913	1.00521	0.877795	0.977271	0.963912
4896	FAHFA(22:6/22:1)	0.948323			QTBMDVVNWVTIGG-OAHMSRQJSA-N	663.576	508.986	0.141249	0.916448	0.496133	0.755589	0.571299	1.17578	0.429379	0.935186	1.19578	1.42078	0.948669	0.832531	0.625038	1.49149	1.12791	0.732444	0.834806	0.464262	0.966685	1.43585	0.874865	0.985332	0.997435	0.316074	0.660137	1.06541	0.605586	0.666688	0.689014	0.666194	0.645254	0.732351	0.418966	0.766932	0.559018	0.473674	1.14687	1.06525	0.705869	0.483621	0.777454	0.721357
4206	FAHFA(17:0/22:4)	0.948323			VYEULUWHKSOHAK-WDZSBUSASA-N	599.501	454.775	7.21107	7.33695	4.99326	5.53012	5.59196	7.13695	4.36343	6.4793	8.10085	6.06366	6.98505	6.72884	7.03794	5.6407	7.48078	7.76166	7.81722	7.53504	7.4367	6.21423	6.67229	5.28376	6.43094	3.38469	6.71373	6.81985	7.00751	4.29557	4.70041	5.87493	4.46015	6.10564	4.71842	5.02308	4.54101	5.17857	4.68468	4.46753	6.50544	6.53749	7.8814	5.53074
1767	FAHFA(3:0/18:3)	0.948323			SEQCMHGNTIRIDD-ORKBZCNQSA-N	349.238	130.852	0.0277783	0.174856	0.110799	0.136727	0.0863566	0.128091	0.176535	0.228337	0.210466	0.176691	0.244612	0.155043	0.168243	0.205272	0.219243	0.216285	0.225131	0.133402	0.21332	0.397879	0.181753	0.101119	0.0936407	0.0947397	0.141663	0.170646	0.160974	0.09063	0.110979	0.107862	0.124149	0.104978	0.124349	0.22022	0.123873	0.0904089	0.295897	0.161267	0.17694	0.0823477	0.122653	0.134967
2663	LPE(16:0)	0.946906			YVYMBNSKXOXSKW-UHFFFAOYSA-N	452.278	93.501	0.43535	2.57778	1.13977	1.57716	1.45856	1.64142	1.49116	2.49647	2.18361	1.27164	3.06382	0.985569	1.94761	2.28647	2.31285	3.12175	1.7031	1.26499	1.8144	4.61162	1.96926	1.62695	1.33905	1.23582	1.32396	1.77432	1.228	1.38379	2.34727	1.08334	1.6169	1.43176	1.86017	2.24761	2.41594	1.13415	3.43724	1.50908	2.61679	0.546785	1.78264	1.69708
5658	PE(16:2e/20:4)	0.945997			ZFOGUGAOGMISNV-OWHSQDTASA-N	720.496	391.971	0.0857865	1.00149	0.563225	1.14174	0.65981	0.77102	1.24851	0.766162	1.21366	0.881383	1.09906	0.63381	0.566633	1.91168	1.05131	0.878073	0.783115	0.840054	1.07114	1.47152	0.931959	1.99656	0.591403	0.824622	0.683314	1.01599	0.814931	1.3698	1.26032	1.01744	1.12446	1.02409	0.842205	1.38604	1.10036	0.745346	2.7357	2.07586	1.11148	0.55585	0.894854	1.15853
6862	PC(16:0/18:2)	0.944022			JLPULHDHAOZNQI-AKMCNLDWSA-N	802.566	407.92	0.0754382	0.0209383	0.0256882	0.0335995	0.0473495	0.037255	0.0458044	0.207202	0.0394172	0.126116	0.042868	0.0138538	0.0217703	0.114652	0.0157532	0.48522	0.0387332	0.129015	0.117175	0.0453575	0.0841604	0.0414746	0.110364	0.0415104	0.0119615	0.0256915	0.100289	0.0905513	0.0647223	0.0407876	0.0500029	0.0910859	0.0657879	0.0409179	0.0297633	0.0345268	0.0568476	0.0469433	0.0261573	0.01177	0.0154957	0.0498326
6633	PE(20:4/20:4)	0.94319			AXKKDIYHTGSBKS-CKKCRWTASA-N	786.506	365.856	0.486973	4.86704	4.75477	2.52654	3.06764	5.1581	5.60851	7.40073	7.61093	8.42906	7.541	3.21417	3.73366	7.15354	4.95249	4.65938	3.83852	2.32078	5.45293	6.8887	4.98327	3.22284	5.9948	6.9182	3.94241	2.98798	3.18885	4.74828	6.60585	3.65783	6.64771	5.21903	4.60651	8.1812	8.10733	4.40766	9.06364	7.54852	5.68123	1.42332	3.45401	5.28036
5689	PE(18:3e/18:2)	0.942718			LEHRGYNETDXIQY-LOYOHVQTSA-N	722.504	391.909	0.041234	0.0713236	0.0578769	0.0842245	0.114258	0.0647879	0.131602	0.161279	0.122207	0.087865	0.0769385	0.0472369	0.0853074	0.18716	0.0492131	0.0653698	0.0701754	0.0614359	0.09963	0.155653	0.0917389	0.219956	0.0968641	0.082396	0.0568529	0.0835121	0.0685304	0.172108	0.0961378	0.104623	0.107411	0.106202	0.0838295	0.127196	0.109185	0.070388	0.288086	0.224083	0.116672	0.0448592	0.0733797	0.116614
7153	PE(18:0/24:4)	0.942037			CNFXZBRCOHOJAB-PYQGTGCGSA-N	822.552	502.461	0.0280418	0.214946	0.120199	0.0503685	0.175146	0.036801	0.0943709	0.0805726	0.0829408	0.0511939	0.107063	0.0842582	0.107659	0.135381	0.0831521	0.0651802	0.0782502	0.0631158	0.0850365	0.0608618	0.0902269	0.105177	0.0728423	0.0596384	0.0817578	0.0773906	0.113736	0.193428	0.111478	0.0737704	0.0746535	0.0381155	0.107002	0.155976	0.110612	0.0718163	0.105078	0.166906	0.102581	0.0322544	0.0814397	0.0967826
7946	PC(20:4/20:4)	0.93939			BFCSBEFTXQRIOJ-QIURYZFVSA-N	874.561	367.021	1.25013	4.54963	3.99909	3.69977	4.02277	4.86984	4.61196	5.76174	8.36055	6.10112	6.46503	4.18367	3.26524	5.65045	3.85203	4.6871	3.76379	3.74314	4.46469	7.05959	4.71807	4.74969	4.78259	5.24605	4.04112	4.43522	4.82319	6.7821	4.54009	5.84501	5.50733	6.1828	4.45175	9.12725	5.38748	4.41201	7.80784	8.64211	4.37062	2.50405	4.23604	5.39372
7238	PC(16:0/20:3)	0.939269			FHYXYDNOQOCPNC-XSMZTDTHSA-N	828.567	413.492	5.73996	15.0513	13.8671	14.6787	15.4549	18.1198	15.1768	15.6344	22.7269	17.1794	16.8983	14.0577	13.3982	16.7995	12.204	15.1204	15.5043	13.8616	13.4417	19.5666	15.2241	14.8432	14.5564	16.2621	13.8989	14.7576	12.9126	16.4769	18.265	16.2322	15.0832	17.5511	14.9048	19.8181	12.6635	13.1904	16.6297	16.7373	13.3185	10.4282	12.9391	15.0734
6055	PG(16:0/18:2)	0.936796			ATBOMIWRCZXYSZ-BCTRXSSUSA-N	745.504	293.149	0.0274138	0.153157	0.0692117	0.233012	0.150953	0.0918537	0.0901757	0.0697073	0.0676733	0.11257	0.118249	0.0379503	0.0620886	0.0681494	0.0794763	0.110455	0.0665053	0.098572	0.0816067	0.139355	0.0964067	0.152095	0.0797214	0.0814401	0.0892287	0.0880856	0.0637806	0.0858381	0.188835	0.076461	0.100853	0.10299	0.0732839	0.0619921	0.000696582	0.0618395	0.0920542	0.125426	0.0867911	0.0431913	0.0590991	0.0856852
7433	PC(18:0e/20:4)	0.936405			PTKWWHCMNOQBSL-WKUHSSGJSA-N	840.612	492.196	0.332812	0.732109	0.82831	0.675885	0.540075	0.826877	1.00655	0.957634	1.04651	0.958535	1.17296	0.67773	0.810393	0.794166	0.837331	0.778878	0.90188	0.776612	0.883557	0.998916	0.826886	0.932782	0.643308	1.03949	0.599321	0.76138	0.523258	0.748769	0.885634	0.895474	1.04587	0.672832	0.750361	1.06392	0.803981	0.506675	1.2668	1.05761	1.03779	0.547372	0.695519	0.823908
6997	PC(16:0e/20:4)	0.935622			SOUZQPFUXRVDGK-SHJNOZFHSA-N	812.579	453.259	2.78266	7.07452	6.94388	5.83052	7.94826	7.47239	9.47576	7.14773	8.61444	8.67247	11.5813	5.6662	6.03498	8.02615	7.12643	6.15645	6.42013	7.43732	7.59906	8.79828	7.34045	8.01602	6.76679	13.3698	5.26062	6.94736	5.3763	7.90219	8.92761	6.86694	8.62265	5.92513	6.9369	9.57297	7.54997	6.82617	11.8592	10.1854	9.50887	3.99784	7.23142	7.8825
3840	LPI(16:0)	0.935264			UOXRPRZMAROFPH-UHFFFAOYSA-N	571.287	66.4396	0.00795443	0.219638	0.061771	0.10379	0.0727393	0.0839568	0.0903893	0.105514	0.118641	0.0901357	0.151602	0.0406815	0.078763	0.147157	0.0882	0.218519	0.0635712	0.0489944	0.0870683	0.201534	0.104031	0.117429	0.0760767	0.0945356	0.0527968	0.118546	0.0595479	0.121892	0.148171	0.0788998	0.146663	0.102538	0.0564502	0.183481	0.0988589	0.0752743	0.226175	0.126258	0.0987963	0.0236559	0.074582	0.104031
6831	PC(16:0/18:3)	0.934919			JMAYDGBZRHQJAT-XSMZTDTHSA-N	800.545	396.889	0.635205	1.39449	0.727545	1.3199	0.97201	1.09939	0.951167	1.11728	1.34311	0.974013	1.77149	0.712149	0.976518	1.35007	1.15897	1.37821	0.968914	1.12893	1.01958	1.34607	1.11725	1.38496	0.961856	1.04048	0.841445	0.974917	0.872624	1.00703	1.26989	1.03224	1.12948	1.01897	0.925643	1.17834	1.02149	0.895617	1.78033	1.22763	1.29448	0.786933	0.952974	1.07987
6980	PC(16:1e/20:4)	0.933663			VXQMCPDKMGAOGH-LNJNMWSOSA-N	810.525	467.256	1.93327	3.68402	2.5016	3.10645	3.00966	3.13352	3.32832	2.84895	2.52681	3.56257	3.57998	1.79284	2.44381	3.61003	3.2528	3.34169	2.77631	2.18406	3.1564	3.48601	2.96295	3.16744	2.92626	2.60977	2.80681	2.23681	3.2479	2.52655	3.92108	2.41303	2.67478	2.80494	2.49325	2.90008	2.74586	2.64726	3.69576	4.03884	3.11957	1.82018	3.43179	2.9114
6762	PG(18:2/20:3)	0.9333			DYTFWSAZEBKKCH-ORBABMLBSA-N	795.508	257.312	0.0165275	0.0801662	0.0648961	0.0638257	0.0585305	0.0767931	0.0412179	0.0553377	0.060734	0.0387541	0.100474	0.0179596	0.0302498	0.0472728	0.057697	0.0502896	0.0406538	0.0334366	0.034847	0.102638	0.053615	0.0330359	0.0394206	0.0541729	0.02294	0.0466057	0.0232488	0.0340898	0.0822044	0.0356747	0.0412629	0.0383386	0.0502797	0.0606974	0.0376203	0.0507475	0.0653955	0.0372426	0.0321074	0.0180363	0.0258107	0.0414466
8095	OxPI(16:0/18:1+3O)	0.931815			KHPXECYDFMPJMP-ZQHSETAFSA-N	883.533	323.158	0.105499	0.802244	0.538931	0.821584	0.294151	0.927646	0.670474	0.293561	0.932315	0.907602	0.686332	0.49493	0.401847	0.886691	0.678691	0.730739	0.616287	0.373043	0.388378	1.12573	0.633834	0.516858	0.58642	0.35938	0.710372	0.729704	0.504494	1.01951	0.752728	1.21758	0.980321	0.996637	0.400342	1.09918	0.721597	0.929418	1.69194	1.43727	0.320991	0.324614	0.425548	0.786245
7574	PC(16:0/22:6)	0.930728			IESVDEZGAHUQJU-SYGPSSPWSA-N	850.558	402.089	2.24523	5.87809	6.16813	4.33617	5.55805	5.95794	6.97282	8.09693	10.0821	8.5927	9.01632	9.66841	7.13312	9.09386	6.83947	7.54609	8.03422	6.21458	6.87464	7.71501	7.10119	7.97658	7.31619	8.671	5.56004	5.79171	5.7623	7.41297	7.49605	7.72332	9.15824	7.65664	6.51679	12.0611	8.57998	7.73211	9.3342	11.6161	9.1681	5.66186	7.60814	7.94017
5693	PE(16:1e/20:4)	0.927809			YATSYZSZUULQDZ-GKPKDRHFSA-N	722.513	436.826	24.3085	71.6219	64.883	72.294	73.0926	70.396	95.9457	67.4469	92.0718	80.1851	81.7795	65.8862	60.7638	101.344	76.0334	68.6	71.8799	73.9725	76.0464	89.6298	73.909	96.6529	65.7338	82.9119	68.9842	75.0854	69.4427	97.5386	100.119	90.68	95.6508	74.0629	71.1055	94.3575	75.2794	74.8077	115.809	111.149	77.6721	49.6659	82.3401	83.4524
2909	LPE(18:0)	0.923645			BBYWOYAFBUOUFP-UHFFFAOYSA-N	480.273	93.212	0.0547309	0.0898829	0.0537992	0.100515	0.0741976	0.0508572	0.0778659	0.0166372	0.0486839	0.0204195	0.0399976	0.0218093	0.0435879	0.029678	0.0279119	0.0856902	0.030308	0.0614065	0.00755005	0.0381713	0.048685	0.0178713	0.0391378	0.0322532	0.0452649	0.0163538	0.0649999	0.0439217	0.0321165	0.135547	0.052956	0.0377191	0.019747	0.0189986	0.0255468	0.0460041	0.0571295	0.0246232	0.0536889	0.0342612	0.0709901	0.0434565
7607	PC(18:2/20:3)	0.923632			LSNIXSHXTMSKGF-JPMBMWHXSA-N	852.573	404.585	1.41971	6.72742	3.30331	4.54725	4.30522	3.22004	6.53071	4.95638	5.38285	6.11625	5.48116	3.68351	6.87091	10.3687	4.88372	5.77823	4.66716	3.92141	4.87314	6.24714	5.16421	7.46046	5.36119	4.91565	5.92311	4.77255	5.09223	8.42635	6.28673	5.49417	4.50005	5.70109	6.80988	5.90609	8.45614	5.70834	8.48648	10.4825	7.60937	3.05149	6.75336	6.35986
7397	PC(16:1e/22:4)	0.920423			DXWWZGSYACJKKM-LNJNMWSOSA-N	838.598	493.831	0.911778	1.69064	2.68109	1.10746	1.31782	1.55046	2.56756	2.18291	3.36579	2.45898	3.22818	2.12627	2.16515	2.04072	1.8216	1.85479	2.14393	1.78589	2.15704	2.83166	2.09949	2.91298	1.4784	2.70421	0.987362	1.85706	1.34258	2.1436	1.45069	1.89163	2.43407	1.60756	1.70983	2.96455	2.13173	1.49876	2.74639	1.8726	2.52203	1.24504	2.09776	1.97994
7032	PC(18:1e/18:2)	0.919423			MFZLAZYUXHHSIA-RWLIYIGXSA-N	814.593	466.727	0.262234	0.486835	0.38883	0.434632	0.386014	0.414602	0.581064	0.38496	0.444767	0.649671	0.699484	0.230958	0.279682	0.517347	0.554895	0.488534	0.317578	0.410441	0.457935	0.587146	0.44888	0.462781	0.377334	0.4009	0.270042	0.31002	0.407328	0.330965	0.461888	0.329946	0.377165	0.256878	0.300931	0.438964	0.459352	0.43385	0.833845	0.615078	0.480097	0.258877	0.428227	0.411723
6385	PE(18:0/20:3)	0.917481			MSYFXMJDQLPRGO-JTBMWNAQSA-N	768.552	478.118	4.97177	45.7724	14.7384	37.9809	22.8379	15.9009	28.7925	21.8746	26.7043	38.3691	39.7202	26.7632	25.0974	42.7092	34.2824	32.1782	25.1268	27.7453	22.6751	51.3931	29.2817	27.3805	20.9557	19.2362	26.5601	34.3902	22.0689	33.4691	34.958	40.4009	21.4599	27.619	39.6771	27.5258	34.672	24.7717	32.6171	42.4474	44.1548	11.0284	29.8921	29.7642
8470	OxPI(18:0/18:1+3O)	0.916786			VBMZLLCXWPVECC-NVQSTNCTSA-N	911.562	352.829	0.0854852	0.414947	0.285447	0.264142	0.311426	0.425759	0.477713	0.312369	0.726686	0.417134	0.292632	0.340246	0.256801	0.594774	0.744203	1.22262	0.204073	0.225155	0.452975	0.846791	0.445069	0.45054	0.726348	0.477566	0.295831	0.404222	0.365743	0.639035	1.07929	0.446026	0.42742	0.592215	0.422999	0.704506	1.14092	1.1178	0.5409	0.673621	0.448127	0.209318	0.293761	0.57281
7684	OxPC(16:0/20:3+2O(1Cyc))	0.915909			CIGYOGGWJLGBCC-CVTIFTAMSA-N	858.523	302.189	1.34766	8.08765	8.33947	8.01035	6.68464	10.7092	11.8091	8.30724	15.2322	10.6624	8.23935	4.86891	5.62332	10.3127	6.32906	11.6462	6.67877	4.70914	9.68423	15.9123	8.65969	8.56943	6.67331	11.1842	7.77237	8.03772	7.17235	13.4871	10.8087	10.7416	11.3833	12.6915	7.6584	19.3289	10.1804	8.14243	16.3803	14.7766	7.47013	3.34239	6.22642	10.1014
8013	PC(18:0/22:6)	0.915067			FAUYAENFVCNTAL-UFTZFNJNSA-N	878.512	467.762	0.357477	0.482844	0.33286	0.383218	0.436049	0.402171	0.433687	0.372663	0.298739	0.472194	0.492088	0.280472	0.355152	0.432599	0.44442	0.45011	0.355226	0.318602	0.44269	0.414736	0.3979	0.402485	0.422256	0.315501	0.394567	0.282219	0.50256	0.353666	0.503112	0.336498	0.342424	0.399114	0.358992	0.34034	0.375657	0.373025	0.391505	0.51326	0.459343	0.270261	0.504148	0.392047
6864	PE(22:3e/20:4)	0.913532			SMWOPNVQVRIIET-OWLCNBLHSA-N	802.576	489.424	0.04315	0.506175	0.558428	0.894008	0.476971	0.765519	0.60195	0.637247	1.06623	0.625011	0.679062	0.545116	0.449931	0.863709	0.513719	0.663274	0.467936	0.474888	0.751105	0.829422	0.620643	1.01463	0.424377	0.632551	0.630857	0.721223	0.653687	0.863057	0.830729	0.822726	0.804021	0.728889	0.586019	0.874111	0.455284	0.482119	0.932446	1.09793	0.804198	0.476004	0.845771	0.734032
5921	PE(16:1/20:4)	0.908958			CXGZFWPMXPAZEA-NUNQZGBLSA-N	736.532	403.281	0.0579803	0.0259727	0.056869	0.0845624	0.0245312	0.0422487	0.053508	0.045115	0.17922	0.0418489	0.327216	0.0615217	0.0804734	0.0344765	0.0343344	0.0591622	0.0507178	0.0398384	0.0496025	0.025182	0.0687191	0.0403465	0.0271795	0.0307673	0.030981	0.0464618	0.0247109	0.0359948	0.0281116	0.0434564	0.0457587	0.0369937	0.0227086	0.0158355	0.0299215	0.0334356	0.0281137	0.0315911	0.0355996	0.0939693	0.0475628	0.036475
7296	PC(18:0/18:1)	0.907538			ATHVAWFAEPLPPQ-LNVKXUELSA-N	832.569	505.199	0.327118	3.34792	1.89846	2.26165	2.97893	2.3923	3.27496	2.70419	2.45845	2.72974	3.44522	2.20991	2.27499	2.84632	3.20335	2.48553	2.43737	2.91968	2.5311	3.15428	2.59407	2.97101	2.55758	3.92139	2.36698	2.02663	2.05413	2.99185	3.72371	2.15914	3.48165	2.3151	2.63202	2.69801	2.61596	2.56445	4.00113	3.55797	3.52535	1.31287	3.34496	2.84109
6501	PC(16:0/16:1)	0.90748			QIBZFHLFHCIUOT-ZPHPHTNESA-N	776.545	414.594	3.8999	8.47123	4.15056	7.56329	4.58847	4.24601	5.22082	6.30989	6.95132	3.2928	6.68524	5.61012	7.00494	6.52243	5.8554	7.81873	5.9275	5.16096	5.21932	6.96523	5.87321	7.5731	4.36207	6.25681	6.32475	7.62524	5.39062	5.69673	5.74894	5.44186	6.40252	5.75027	4.41726	7.42388	4.70966	5.1575	6.59234	6.16858	5.0947	5.65301	6.10005	5.89449
5952	PE(18:2/18:2)	0.907331			SSCDRSKJTAQNNB-MAZCIEHSSA-N	738.507	389.329	1.18572	6.36239	4.31588	8.84238	4.13935	6.73362	7.7669	6.71966	8.30579	11.3593	9.46437	1.74687	4.30409	15.2988	5.95808	10.9978	3.63998	2.64399	8.91216	10.5011	6.95991	10.8508	7.14021	6.75031	4.63935	3.97537	5.72057	7.53008	10.3974	5.83363	5.62811	7.06465	4.82399	6.78045	6.62279	5.03256	21.8235	20.0472	7.48202	1.80105	5.63534	7.77897
6921	PE(18:1e/24:4)	0.907238			NLLOFZNQWPLPNV-GAXXYEEVSA-N	806.596	579.867	0.499334	2.48641	1.11675	0.580248	0.843655	0.588219	0.58192	3.20172	4.12414	3.29963	1.77338	2.43104	2.72277	1.12996	2.0845	0.756277	1.54211	0.540096	4.20884	5.29452	1.99028	1.62962	1.71027	0.623214	0.529861	0.610523	0.472877	1.53463	1.16512	0.936116	4.0513	0.474343	0.670118	4.2116	2.00522	0.876455	0.738486	0.646288	1.46324	1.69971	2.13267	1.40908
6505	PE(18:2e/22:4)	0.905888			LJUQAJDUBALBQT-DYTQRSFTSA-N	776.552	469.957	1.74893	5.33496	4.80082	4.22428	3.23146	5.89901	6.21853	5.87794	8.96881	6.68349	7.20871	5.93158	4.38126	6.51751	4.77072	6.70056	6.19518	4.10556	6.1335	6.81382	5.58733	8.05712	4.92359	6.53676	4.05536	4.56985	4.51849	5.43089	5.96925	5.26274	6.68587	6.56781	4.88513	7.83033	5.8077	4.41412	7.95635	5.86749	7.28721	3.71418	4.28389	5.73121
7690	PC(18:0/20:2)	0.905747			ZQLPLCXRBVPKGP-DYMXKLMASA-N	858.624	526.294	0.799447	1.47515	1.31804	1.74037	1.521	1.44694	1.29059	1.13156	1.57276	1.82525	1.85112	1.06828	1.05408	2.28842	1.32369	1.76805	1.57742	1.16547	1.31505	1.52813	1.45304	2.69864	1.11541	1.39354	1.47788	1.66855	1.93017	1.70063	1.82621	1.81472	1.35168	1.23611	1.17012	2.07012	1.55866	1.66923	2.19494	2.45198	1.94236	1.15639	1.51498	1.69712
6737	PE(20:0/20:4)	0.904445			MIPOZDXFSKBSGM-QLXZSTJSSA-N	794.57	504.124	0.247199	0.761933	0.699872	0.794319	0.634692	0.908914	0.898883	0.711194	0.985642	0.861843	1.08614	0.633873	0.0415942	0.981724	0.780505	0.739799	0.835534	0.62672	0.816524	1.08245	0.756467	0.880104	0.644563	0.931214	0.603354	0.729301	0.609589	0.835751	0.98331	0.900412	0.97285	0.892759	0.803919	1.08828	0.0362288	0.729432	1.40954	1.17642	0.80124	0.439399	0.611654	0.803966
3037	LPE(20:4)	0.900627			JPNPIRVRGLGTRE-LTKCOYKYSA-N	500.278	75.3475	2.20962	7.61909	2.92248	6.35587	6.65698	6.64959	4.67366	8.92713	6.21276	2.6151	10.4781	3.9953	6.12028	6.09372	7.63324	7.78644	4.33653	5.41441	3.1197	9.46115	5.96406	7.38096	6.36476	6.73703	4.18291	7.73188	6.19951	4.6813	9.92534	3.31844	6.40488	4.60537	5.08334	7.28379	6.93096	5.78454	7.39184	3.31726	6.60107	3.04444	5.70749	5.93386
5979	PE(16:0/20:3)	0.900083			IQLKOURRKVPATH-SVNQLWEDSA-N	740.524	429.024	5.12819	11.9598	10.3579	15.0386	21.0058	11.9677	10.64	11.5671	13.894	15.7048	16.0818	13.7855	1.54295	16.0771	12.5011	23.601	19.6198	6.10612	17.1364	3.99004	12.8853	13.442	12.85	10.8259	11.4924	9.31604	11.3406	2.08971	12.9668	2.51173	11.0361	13.4085	2.06675	12.8574	9.78771	9.73413	18.5075	17.5743	11.24	5.96054	11.9742	10.5491
7852	SQDG(18:0/20:4)	0.899223			LDEAULZGVXUSJZ-ZKVKLVECSA-N	869.554	332.476	0.0486456	0.332359	0.325254	0.207231	0.278624	0.415235	0.671349	0.370577	0.43313	0.481922	0.491062	0.13574	0.197005	0.381306	0.431523	0.315974	0.216726	0.252027	0.323254	0.603004	0.345597	0.392537	0.343423	0.501339	0.198108	0.308767	0.261238	0.579804	0.348414	0.510663	0.471663	0.41225	0.431127	0.683388	0.617831	0.223469	0.820666	0.578232	0.383569	0.0707063	0.294391	0.421579
5156	Cer/ADS(d21:0/19:0)	0.898625			HBAHJVMHOZDFJD-UHFFFAOYSA-N	684.596	574.725	2.97412	6.32467	4.53725	5.04018	4.89726	5.51124	5.67678	6.50507	6.71451	6.1706	6.78634	5.96643	6.39638	6.83628	6.08397	6.56216	6.2906	5.35438	6.46112	7.02576	5.90575	5.38755	5.55646	5.34155	5.61655	5.95125	5.06928	4.87778	6.12664	5.19035	5.62621	5.34004	5.42715	6.27702	5.10601	5.21937	5.77501	6.2244	6.38222	4.37977	6.38264	5.56286
6445	PE(20:4e/20:4)	0.898528			RLLNBYUAUWBXEE-CKKCRWTASA-N	772.518	390.49	0.0335287	0.285604	0.312433	0.258148	0.165835	0.27905	0.430611	0.279254	0.579163	0.659366	0.55876	0.115856	0.157518	0.968524	0.390297	0.365248	0.220947	0.186025	0.458309	0.698862	0.370167	0.75527	0.246473	0.369154	0.134595	0.186203	0.312599	0.356669	0.339782	0.254406	0.513088	0.364788	0.212371	0.525081	0.607271	0.226524	1.20936	0.948636	0.583184	0.108806	0.274627	0.426444
8488	PI(18:0/22:4)	0.896413			VTYLJIRGLIZEIC-PYQGTGCGSA-N	913.581	395.182	0.00802061	0.106078	0.0956505	0.137992	0.0857668	0.141575	0.163257	0.11166	0.189003	0.151593	0.126452	0.0466909	0.0683656	0.251175	0.112513	0.153117	0.103459	0.0756403	0.140713	0.216927	0.124282	0.220526	0.0799131	0.180026	0.0836166	0.138983	0.109361	0.213327	0.194307	0.172964	0.215271	0.155044	0.104335	0.250756	0.156314	0.114345	0.331711	0.305084	0.132144	0.0345183	0.0776283	0.163509
8063	PI(18:2/20:4)	0.895599			IDBHHLONPONREV-DMQHYRIXSA-N	881.519	289.938	0.231331	2.79443	1.13047	0.998854	0.907248	1.72787	1.79104	1.40541	3.22217	2.59691	1.49339	0.61849	1.05788	1.99658	1.71357	2.25403	1.32554	0.553425	1.38538	3.09552	1.61498	1.14315	1.38931	3.24531	1.04578	1.50018	2.73246	4.58268	1.55418	1.81766	1.84539	3.1974	1.23237	3.68602	2.21454	1.42574	3.84609	3.89469	1.42025	0.420744	0.908773	2.15514
7654	PC(18:1/20:2)	0.895319			MGYXVNKVMWUCEN-RMSDNIJUSA-N	856.599	466.074	3.19246	6.62384	5.88716	7.05872	7.43355	7.74264	7.41383	6.37316	10.6049	7.78051	8.7091	7.53897	6.30363	8.10514	5.27068	6.38906	7.0156	7.45125	5.81386	7.81197	7.026	7.32906	6.18516	7.98099	5.81141	7.59631	6.76602	7.14821	8.48867	8.38316	8.02076	8.35569	7.04076	8.23659	6.6937	6.59567	8.68801	7.91751	7.24882	6.52206	5.52887	7.32687
5548	Cer/ADS(d23:0/19:0)	0.894552			RPONZCKQQDSWAX-UHFFFAOYSA-N	712.647	588.778	0.207661	1.0535	0.403789	0.774735	0.733259	0.730143	0.844574	1.03818	1.0144	1.09699	1.96523	0.645633	1.29255	0.262209	0.957061	1.31186	1.01519	0.742478	0.647811	1.67452	0.920589	1.02518	0.955906	1.08795	0.856203	0.970206	0.856566	1.05951	1.52737	0.819402	1.12433	0.934878	0.957375	1.2571	1.18234	0.857187	1.11605	1.34135	1.41729	0.320892	0.950545	1.03088
7631	PC(18:1/20:3)	0.893882			JNKAOGSDBBXHEP-SAUDALOUSA-N	854.589	444.992	3.02951	11.4154	7.63701	8.23229	7.39539	3.30108	9.61292	8.15398	9.92276	8.43079	9.76026	7.01751	11.3511	13.7009	8.90965	8.7142	9.0184	7.39492	8.74145	9.63644	8.56879	11.7234	7.99311	7.75621	9.69264	10.5021	7.89235	12.2073	10.4858	9.32143	8.76332	9.40644	8.83568	10.9656	12.0253	9.82996	11.7074	12.4612	10.8466	3.60538	10.3955	9.82084
5244	PE(16:0/16:0)	0.893414			SLKDGVPOSSLUAI-UHFFFAOYSA-N	690.549	398.623	0.0085253	0.0160146	0.0167208	0.0103019	0.0127623	0.0125663	0.0197064	0.016192	0.0311797	0.017947	0.0105234	0.0116704	0.0127144	0.0193099	0.010523	0.0211108	0.0236474	0.0245182	0.0175766	0.0260224	0.0169766	0.0250875	0.00922661	0.0164647	0.0107719	0.0200435	0.016953	0.0165281	0.0239032	0.0190064	0.0154121	0.0460601	0.0148652	0.0112534	0.0464681	0.00662423	0.0231053	0.0153969	0.0215432	0.00866024	0.0105018	0.0188938
6037	PE(18:0/18:1)	0.890533			JQKOHRZNEOQNJE-ZZEZOPTASA-N	744.544	466.882	1.79798	5.08164	3.66513	4.77986	4.1018	4.83305	4.90675	4.13769	4.47381	5.62679	5.72178	2.73041	3.69637	6.26227	4.75251	5.35778	3.96318	2.94967	4.63906	5.92502	4.47013	6.00012	4.13409	4.25637	4.08964	3.34237	4.57865	4.28418	6.31325	4.05293	4.56719	4.78096	3.45478	5.0053	4.12874	3.9305	6.68648	7.06569	4.87651	2.31155	5.03239	4.64458
7848	SQDG(19:2/19:2)	0.890012			IRRPEKSXCOECBB-KWXKLSQISA-N	869.534	374.698	0.0217307	0.134958	0.029937	0.0423527	0.0339897	0.0415841	0.0313806	0.0430568	0.0366417	0.0193922	0.0123658	0.0319234	0.0770196	0.039329	0.022895	0.0661052	0.0440878	0.0264818	0.0508461	0.0365976	0.0421338	0.0673915	0.0317365	0.0329277	0.0780477	0.0445978	0.025791	0.0264619	0.0336483	0.0239277	0.0331471	0.0431857	0.0342935	0.0447446	0.0445762	0.0405717	0.0500807	0.0427699	0.0438127	0.0366721	0.0444944	0.0411439
7143	SQDG(17:0/17:0)	0.890012			DHZFKBZXEZKTHX-UHFFFAOYSA-N	821.516	344.718	0.000169787	0.00354795	0.00607845	0.0012694	0.00548031	0.00460445	0.00836496	0.00760509	0.0160089	0.00722886	0.00405085	0.00253888	0.00140256	0.00397921	0.00912307	0.0174932	0.000659843	0.00138379	0.00408075	0.00404433	0.00545573	0.0289768	0.00464461	0.0255983	0.00765423	0.00479934	0.00480862	0.0066497	0.00741186	0.00649989	0.0185282	0.00571059	0.0038414	0.0054948	0.0199604	0.00542602	0.0209882	0.0130333	0.0109984	0.00107027	0.00397064	0.0103033
6723	SQDG(16:0/16:0)	0.890012			RVUUQPKXGDTQPG-UHFFFAOYSA-N	793.503	284.896	0.0122948	0.0786672	0.0584433	0.0570553	0.0448103	0.0573225	0.107927	0.0784582	0.127175	0.0834984	0.0806691	0.15041	0.0506452	0.154098	0.105152	0.118673	0.0893119	0.0431737	0.0676849	0.14327	0.085437	0.118052	0.0537676	0.0592311	0.0846406	0.123661	0.0491045	0.127235	0.0647665	0.0664921	0.109385	0.119181	0.0849254	0.120775	0.0877389	0.0733543	0.188784	0.125961	0.0827832	0.0400753	0.106676	0.0943295
8093	PI(18:1/20:4)	0.889483			XGZVRASBCZTHNO-HAGCXRLMSA-N	883.533	307.876	0.850169	4.48727	4.28441	4.82634	2.90579	5.18621	4.88441	3.50713	7.40896	5.37274	4.72391	3.1477	3.13605	5.79242	3.99838	7.7111	2.91059	2.02669	4.68582	6.64837	4.42472	5.45592	3.22682	4.86197	4.40045	5.15208	4.08023	7.54845	4.22606	5.52784	5.39295	7.61127	3.80257	10.9042	5.13255	4.31145	8.83744	8.26683	2.91218	2.13321	3.07955	5.3432
7880	PI(17:0/20:4)	0.887377			NHCUHDJVBAQLLF-UMWXEKTDSA-N	871.547	308.301	0.00576288	0.0404102	0.0894238	0.0572244	0.08933	0.147163	0.129487	0.0506943	0.230694	0.0790814	0.0573296	0.041711	0.0506009	0.0961675	0.131532	0.0330058	0.0729297	0.0744125	0.0498026	0.217686	0.0872224	0.0456872	0.0413469	0.0634285	0.0610838	0.0592375	0.0321382	0.150853	0.0805645	0.145089	0.113542	0.0498444	0.127846	0.093109	0.054792	0.031332	0.0917562	0.106819	0.0446588	0.0241549	0.0337546	0.0725519
7196	PC(16:0/20:5)	0.886891			KLTHQSWIRFFBRI-KOQZQRJKSA-N	824.545	403.532	0.0170756	0.207551	0.281657	0.187036	0.171786	0.278045	0.0620559	0.237645	0.293262	0.171418	0.331253	0.278618	0.102108	0.174067	0.187992	0.179647	0.140801	0.0581701	0.185789	0.23352	0.188975	0.158784	0.185918	0.24425	0.106712	0.233669	0.133305	0.143912	0.223837	0.235417	0.141817	0.221623	0.430606	0.280677	0.165773	0.140255	0.191944	0.180145	0.166128	0.186285	0.184479	0.197777
7493	SQDG(16:0/20:2)	0.885365			YNGOBOFKDJKYLL-BCTRXSSUSA-N	845.574	328.802	0.0445455	0.0179423	0.0177987	0.00978521	0.0196738	0.0260707	0.0506029	0.0199331	0.0317114	0.0345838	0.0330456	0.0122332	0.0119956	0.0297128	0.0237192	0.0215942	0.0156352	0.0153115	0.0255045	0.0459749	0.0253687	0.026976	0.0250905	0.0602016	0.0122296	0.0205074	0.181632	0.0399283	0.0254169	0.036256	0.0374718	0.029236	0.0291439	0.0485301	0.0415766	0.014987	0.0710892	0.0578052	0.0237598	0.0535992	0.0212629	0.042835
7343	PE(18:1e/26:4)	0.885209			QEUKOPROVURKOQ-GAXXYEEVSA-N	834.636	592.702	0.00244239	0.0176695	0.0342338	0.0918051	0.0529605	0.0790319	0.0531889	0.0325848	0.0759457	0.0134911	0.0271839	0.0381599	0.034906	0.0661561	0.00684498	0.0400609	0.0525223	0.0505561	0.0469259	0.110236	0.0463453	0.085318	0.0190274	0.0722526	0.0561269	0.0753444	0.0457304	0.0900717	0.0909863	0.0802683	0.0888103	0.077324	0.0626781	0.0669059	0.0486667	0.0577506	0.0871224	0.123115	0.0462447	0.0545623	0.0670921	0.0697699
7441	SQDG(18:0/18:4)	0.88495			GQJDFGSWZISHAW-QLXZSTJSSA-N	841.503	239.542	0.0646344	0.229391	0.393438	0.130954	0.204263	0.195906	0.261878	0.444026	0.820586	0.294319	0.484147	0.250933	0.128881	0.313931	0.22466	0.294958	0.225029	0.193207	0.213606	0.683038	0.302589	0.150702	0.224023	0.697558	0.14251	0.272275	0.180148	0.264104	0.333641	0.224406	0.289985	0.328568	0.405081	0.365378	0.283957	0.147896	0.454184	0.266751	0.268339	0.110201	0.179727	0.279472
7918	PI(17:0/20:3)	0.884043			ULLXFXIZYYTQGK-JTBMWNAQSA-N	873.541	327.438	0.023731	0.192659	0.103165	0.0822754	0.102769	0.130296	0.119253	0.142774	0.343228	0.143317	0.1586	0.151126	0.0709787	0.22518	0.103632	0.229071	0.0791144	0.0901413	0.117803	0.148809	0.137896	0.193551	0.13557	0.225937	0.103347	0.149938	0.105293	0.20597	0.131724	0.133031	0.144319	0.271034	0.126833	0.294668	0.250101	0.125835	0.245957	0.187844	0.178825	0.0477773	0.156403	0.170698
7068	SQDG(18:0/16:2)	0.882347			RKOVHHCTLAFQLQ-UDJAPEQQSA-N	817.501	245.645	0.108618	0.559516	0.697983	0.488242	0.401781	0.524428	0.468171	0.657365	1.06809	0.604808	0.867752	0.325621	0.211077	0.620625	0.556473	0.709638	0.412303	0.359757	0.465991	1.55249	0.583037	0.550914	0.483603	1.02976	0.284962	0.508264	0.453645	0.470953	0.740687	0.424812	0.522007	0.641687	0.527166	0.623334	0.48054	0.362408	1.07415	0.859406	0.699807	0.210919	0.460098	0.570456
7098	SQDG(16:0/18:1)	0.882346			SQOJCPIJIDPYDD-ZCXUNETKSA-N	819.517	275.425	0.0231142	0.24277	0.635222	0.563889	0.0373923	0.435152	0.490105	0.0841667	0.132192	0.518834	0.512114	0.0583053	0.0969022	0.0862635	0.600943	0.0641618	0.508087	0.404003	0.0785609	1.38958	0.348088	0.231344	0.301424	0.110448	0.0834563	0.0632207	0.212984	0.0816068	0.564022	0.371784	0.529699	0.086191	0.501223	0.11196	0.117737	0.133145	0.722582	0.684363	0.0758045	0.113972	0.0184854	0.255772
8451	PI(20:2/20:4)	0.88174			KZQXGHITEVVEIH-MDCIFNJCSA-N	909.549	310.328	0.0108724	0.0802244	0.0631785	0.0871236	0.0358017	0.268759	0.104755	0.0519138	0.291117	0.063673	0.0507209	0.137959	0.0542738	0.124266	0.0441704	0.282115	0.0505546	0.00220129	0.214572	0.328338	0.117329	0.0684073	0.158715	0.0380534	0.0599275	0.220844	0.182207	0.183929	0.213411	0.120619	0.0635847	0.284584	0.0981462	0.488621	0.288272	0.107615	0.227642	0.28097	0.0746979	0.0292176	0.127505	0.165848
6095	PE(18:2e/20:4)	0.87792			QGMRGDWLZOYPFY-YUPWHRRNSA-N	748.529	440.948	10.5615	15.1602	28.6377	29.5758	24.793	27.6842	38.5924	14.2487	44.1682	33.4146	31.1023	28.474	24.6899	37.2123	28.7631	28.1485	22.7386	27.0505	31.8221	41.9576	28.4398	40.246	28.1886	29.0615	25.6667	31.4174	23.7572	36.4293	26.4049	35.554	33.5873	32.2021	29.0034	37.742	29.4896	23.16	38.6292	37.8143	32.237	17.728	32.0607	31.019
7737	PI(16:0/20:2)	0.877259			UJENRFPZRNBKKL-BCTRXSSUSA-N	861.539	321.448	0.101812	0.776846	0.508309	0.667816	0.448652	0.361463	1.25784	0.48192	0.743712	0.650361	0.369768	0.262961	0.571636	1.18174	0.430011	0.668363	0.479366	0.328652	0.594999	0.914794	0.590051	0.674072	0.455547	0.547656	0.707487	0.556312	0.515938	1.28035	0.838105	0.813229	0.88392	0.935816	0.627454	1.30217	1.09015	0.810276	1.3973	1.25287	0.733751	0.253592	0.615068	0.814553
7738	PI(18:1/18:1)	0.875264			LALGUHSIWLNTNW-CLFAGFIQSA-N	861.549	355.783	0.668408	1.63063	1.75515	2.16172	1.30256	2.05765	2.14743	1.2839	2.02724	2.85549	2.42575	0.760621	0.881812	2.42723	1.35327	2.90491	1.67396	0.983324	1.79969	2.91792	1.80093	2.27173	1.37373	1.82726	1.38787	1.9237	1.67619	1.99497	2.04671	2.28829	1.92207	1.85493	1.52736	3.19403	1.92354	1.63901	3.74021	3.64318	1.81191	0.996891	1.21578	2.01297
7823	SQDG(16:0/22:5)	0.874523			QKKYSWRBWHUYOH-SFVLIGPRSA-N	867.516	261.435	0.0469068	0.246294	0.348203	0.176933	0.289125	0.160732	0.421503	0.328738	0.725175	0.34189	0.374652	0.233742	0.175639	0.452656	0.483225	0.311041	0.478711	0.311054	0.230443	0.82794	0.34823	0.289821	0.260147	0.435726	0.160658	0.281527	0.319919	0.393095	0.41099	0.362684	0.397304	0.273756	0.507183	0.269314	0.309513	0.22952	0.480765	0.51989	0.381408	0.151647	0.310333	0.33726
8450	PI(18:0/22:6)	0.874236			DJVOKHFQPGWUPK-HSBBONCLSA-N	909.509	366.221	0.00215422	0.0233208	0.017867	0.0195043	0.0286611	0.0325622	0.0144794	0.0227306	0.0284691	0.0334826	0.0222461	0.0168932	0.0213273	0.0129643	0.0205216	0.0153152	0.0160687	0.0142686	0.0113266	0.0293383	0.0201751	0.0176417	0.0199789	0.0179066	0.00796953	0.0223321	0.012715	0.0106198	0.0391954	0.0262545	0.022283	0.0171181	0.0304508	0.0234544	0.0179236	0.0162077	0.0184651	0.0157406	0.0211687	0.0112454	0.012746	0.0190708
7652	PC(18:0/20:3)	0.873612			LLUINWFQEIMZRU-JOIBFBEQSA-N	856.606	491.174	4.51787	15.8381	7.26546	13.0856	21.73	7.91054	15.345	10.1252	14.6879	13.0058	29.5136	9.14256	15.0824	39.9772	19.5819	11.2786	14.3286	12.7781	10.5791	12.8516	14.9313	19.779	19.542	23.1842	15.8722	27.1649	13.0689	16.6	31.0896	14.7074	11.719	11.7572	24.4074	14.1785	18.442	16.5693	19.6935	21.3202	33.1034	10.0044	23.5024	19.2853
7669	PI(16:0/20:4)	0.871781			VWRYMIZQLPXULA-JAXHXWBXSA-N	857.516	302.055	2.58223	16.9039	17.671	16.5224	13.4872	22.7308	24.935	16.7244	31.0405	21.8572	17.2981	10.2824	11.3063	21.4276	13.2588	23.3627	13.6872	9.50328	20.2047	32.2554	17.852	17.5515	13.7742	23.5814	16.2672	16.1948	14.4743	27.3648	22.6914	21.8009	24.0029	25.1057	15.4752	39.1762	21.7109	17.1828	33.894	30.9854	14.8194	6.58228	13.0841	20.786
6479	PC(14:0/18:2)	0.870975			IWXJKHSPEQSQMD-YPRCPECBSA-N	774.505	326.575	0.0115125	0.0441831	0.011632	0.0110846	0.0248832	0.0207919	0.0162859	0.0327254	0.0282003	0.00860548	0.0501742	0.0287724	0.0345227	0.0261888	0.0321292	0.0321783	0.0352303	0.0264339	0.0111103	0.034261	0.0260453	0.0426586	0.0366468	0.0488651	0.031721	0.0355695	0.027163	0.0116423	0.0411151	0.00612702	0.0205681	0.0156767	0.0198232	0.0172077	0.0335242	0.023367	0.0188857	0.0073314	0.0353901	0.0203725	0.0334527	0.0263554
7404	PC(18:1e/20:4)	0.870843			YPEVVVCDYBKGNI-BXHZXWGDSA-N	838.547	477.604	0.0674877	0.423713	0.0256275	0.221872	0.297123	0.0971925	0.277884	0.189943	0.219606	0.183885	0.141617	0.118658	0.321195	0.360894	0.23496	0.142671	0.251188	0.18337	0.184677	0.288338	0.211595	0.167815	0.232182	0.102665	0.357523	0.234975	0.272583	0.359292	0.339643	0.260428	0.195798	0.306583	0.330969	0.263952	0.361437	0.271433	0.909629	0.384417	0.337004	0.132793	0.352953	0.308704
5811	PE(17:0/18:2)	0.870804			UJCJWIHZUHMDIT-OHNCOSGTSA-N	728.522	444.337	0.158681	0.66526	0.42967	0.576606	0.748221	0.806653	0.563876	0.487168	0.662963	0.771689	0.614999	0.278785	0.454801	0.747111	0.612806	1.05645	0.430571	0.283941	0.686332	0.676606	0.585659	1.0942	0.551272	0.601344	0.493983	0.540438	0.663974	0.421481	0.698434	0.525796	0.54098	0.556182	0.449604	0.552817	0.515402	0.506714	1.08789	0.883285	0.705923	0.253341	0.540519	0.609179
5894	PS(16:0/16:0)	0.870522			KLFKZIQAIPDJCW-UHFFFAOYSA-N	734.478	345.569	0.00341679	0.0310129	0.0112715	0.0205963	0.014466	0.0175405	0.0186973	0.0478091	0.031501	0.0154052	0.0479622	0.0168577	0.0394577	0.0333203	0.0282296	0.0356786	0.0209987	0.0153689	0.0162625	0.0295349	0.0247694	0.0347321	0.0275709	0.0210745	0.033385	0.0230654	0.0200226	0.0222059	0.0333403	0.0142628	0.0179575	0.0263785	0.0181088	0.0246328	0.021439	0.0244744	0.0371463	0.0320838	0.043507	0.0122604	0.018759	0.0253204
5738	PE(16:0e/20:4)	0.870266			KYVSHEBKXHVDDI-PYQGTGCGSA-N	724.529	472.113	0.140533	0.422754	0.231305	0.43551	0.402454	0.434583	0.51035	0.420638	0.0314301	0.359614	0.503113	0.285321	0.304301	0.517893	0.359541	0.380191	0.377877	0.37476	0.425496	0.5503	0.373398	0.579986	0.360126	0.332282	0.499142	0.439229	0.332789	0.47254	0.045766	0.545982	0.401594	0.318814	0.381349	0.0430868	0.0469137	0.459155	0.663684	0.601184	0.489066	0.218703	0.39664	0.381401
7468	SQDG(16:0/20:3)	0.869631			FWOXUTSFIFDMMV-SVNQLWEDSA-N	843.554	327.883	0.0164147	0.172273	0.135885	0.107605	0.207045	0.2235	0.351818	0.324717	0.225533	0.246114	0.360224	0.106857	0.474556	0.225823	0.217366	0.327094	0.128655	0.168011	0.194022	0.35811	0.228581	0.267045	0.189017	0.403564	0.0996356	0.645077	0.192282	0.290196	0.246004	0.267484	0.27917	0.229304	0.214154	0.348432	0.319371	0.125861	0.482188	0.404003	0.194447	0.146753	0.169059	0.275652
8171	PI(19:1/19:1)	0.868607			YYTBTIYYOOGFDQ-WRBBJXAJSA-N	889.573	369.142	0.17227	1.12372	0.506093	0.956166	0.71965	0.569466	1.37766	0.709204	1.21314	1.05158	0.727679	0.418906	0.828893	2.13447	0.669194	1.00889	0.689753	0.562141	0.740643	1.39683	0.878817	1.36085	0.833748	1.11671	0.925252	1.03516	0.848996	1.75032	1.36391	1.1175	1.05547	1.14621	0.988795	1.41262	1.48576	1.09124	1.92294	2.41879	1.39796	0.396261	0.88359	1.2276
6632	PC(16:1e/18:2)	0.867922			AXCLECQLCBWNLZ-DZELQHPSSA-N	786.564	454.754	0.628901	1.03782	0.900035	0.828881	0.757461	0.899411	1.1797	0.808232	1.21437	1.39229	1.4283	0.876837	0.664572	1.27358	0.972503	0.990421	0.889579	1.08777	1.08594	0.953674	0.993514	1.44456	0.780188	0.808582	0.806877	0.774424	0.997308	0.902974	1.27955	0.834031	0.994479	0.757888	0.726851	1.04293	1.0211	0.906083	1.60158	1.42801	1.14704	1.00099	1.05001	1.01527
7355	PI(18:0/16:1)	0.866697			QMAMEGDTQPWOEM-PEZBUJJGSA-N	835.533	342.829	0.749942	2.51435	2.42482	2.89317	1.62828	2.74963	2.7154	2.01751	3.80509	2.56839	2.73989	1.35935	1.63253	2.7871	1.73533	4.33431	2.04345	1.19389	2.15453	4.46601	2.42565	2.58779	1.71369	2.76684	2.13101	2.75823	1.82295	3.13997	2.27124	2.93955	3.10024	2.96869	1.86558	6.29929	2.479	1.99076	4.32052	3.93887	1.88701	1.06683	1.66937	2.68587
7356	PI(16:0/18:1)	0.866568			PDLAMJKMOKWLAJ-ZCXUNETKSA-N	835.533	365.911	0.489633	1.98625	2.28962	1.60828	1.5904	2.01749	2.78355	2.48169	3.34855	2.76445	3.54147	2.04403	2.07734	3.10083	2.55088	2.26745	3.12633	1.5999	2.02464	2.35825	2.30255	3.72275	2.22919	4.15697	2.24825	1.9879	1.81481	2.55371	2.83971	2.34857	3.95906	2.33148	1.91961	3.16617	3.08906	2.5519	4.48752	3.54893	3.82368	1.45208	2.19762	2.82145
7773	PI(18:0/18:1)	0.866507			YOBFISPJJWPPTK-ZZEZOPTASA-N	863.555	355.839	0.0717795	0.250239	0.207583	0.311061	0.193337	0.303829	0.321263	0.177925	0.344156	0.447891	0.37259	0.15252	0.146229	0.36078	0.203591	0.425878	0.238534	0.144093	0.284011	0.430302	0.26938	0.336532	0.21176	0.291493	0.167173	0.289834	0.239134	0.294304	0.27208	0.333441	0.289107	0.275742	0.228575	0.482978	0.269705	0.239512	0.581576	0.548178	0.249242	0.151077	0.193625	0.297253
8597	PC(22:6/22:6)	0.866398			XLKQWAMTMYIQMG-MYZZJVRYSA-N	922.558	339.091	0.00475606	0.135669	0.0810095	0.0141666	0.052636	0.0512169	0.109357	0.168333	0.246201	0.0762221	0.259206	0.124318	0.0871427	0.209936	0.12502	0.0593343	0.0806123	0.0785791	0.0752578	0.119511	0.107924	0.148922	0.115333	0.27522	0.0722159	0.079255	0.103082	0.134852	0.116256	0.0724273	0.252405	0.118413	0.0681111	0.530885	0.34868	0.181761	0.276809	0.368911	0.227346	0.03489	0.154214	0.183999
7366	PC(18:2e/20:4)	0.863413			BOHZCIJMIPHZKG-OANVIGDOSA-N	836.581	446.329	0.546709	1.57954	1.35298	1.01675	0.616295	1.26436	1.78579	1.62286	2.6623	1.1463	2.04691	1.89005	1.31711	1.05239	1.43725	1.41184	0.721665	1.38854	1.84469	1.60356	1.41539	1.87199	0.767328	0.907681	0.945171	1.50668	0.801049	1.32721	0.773905	1.41417	1.81063	0.898886	1.18804	2.2207	1.72237	1.2482	1.34971	0.8847	1.20823	1.17545	1.43621	1.27291
6034	HexCer/NS(d18:1/16:0)	0.863273			VJLLLMIZEJJZTE-ORIPQNMZSA-N	744.564	402.82	1.81032	1.49542	1.36799	2.42265	1.26894	1.41599	1.57341	1.67753	1.15146	1.10521	1.1701	1.96816	2.33488	1.1066	1.08815	2.01819	0.907328	1.67887	1.40655	0.982765	1.49752	1.5226	1.05175	0.971708	1.20112	1.73064	1.25767	1.38288	1.13769	1.66734	1.12153	1.1434	1.08014	0.639247	1.0106	1.0283	1.14769	1.18887	1.32423	3.05729	1.40188	1.30333
5903	PC(14:1e/16:0)	0.862797			UUZCQGXJWICSDM-SQFISAMPSA-N	734.554	373.029	0.509647	0.759482	3.55835e-05	0.911503	0.833839	0.808678	0.393303	3.88278e-05	0.729246	0.263173	0.639769	0.42882	0.287274	0.705745	3.62042e-05	1.1821	0.750338	0.508394	0.398842	0.0561188	0.508319	1.51747	3.61337e-05	0.854453	0.586504	1.03279	0.866686	0.572818	0.628519	0.942606	0.486583	0.430437	0.663856	0.352785	0.0670998	0.405954	1.38815	0.916326	0.846871	0.383151	0.0622138	0.650265
6922	PE(16:1e/26:4)	0.862745			WPPIYRZFHWHJSP-GKPKDRHFSA-N	806.606	559.845	0.229228	0.441029	0.469084	0.961369	0.528232	0.742757	0.564363	0.530683	0.664707	0.532292	0.582149	0.431635	0.402197	0.733219	0.434273	0.699236	0.554209	0.510879	0.560352	1.01965	0.579577	0.808252	0.426886	0.609912	0.573723	0.855361	0.556093	0.710976	0.916891	0.91416	0.810551	0.728662	0.592709	0.760295	0.507347	0.688239	0.87131	1.37778	0.529153	0.560612	0.532087	0.71655
6413	PE(18:0/20:2)	0.862643			WYDGEVICLIVPEG-OHNCOSGTSA-N	770.572	503.901	0.767638	3.034	3.09738	3.01201	2.41385	2.72778	2.2601	2.26166	3.39586	3.33125	2.82356	1.83484	1.77437	3.55921	2.63923	3.29138	2.5256	1.71731	2.34729	3.87026	2.63423	3.44047	2.2832	2.04501	2.7504	2.83403	3.37402	3.62813	3.28119	2.7656	2.2138	2.58541	2.22118	4.69874	2.94018	2.63772	3.75012	4.16932	2.48527	1.23448	2.8783	2.91083
8014	PC(20:3/20:3)	0.860906			SUSAZHLUBGMSDJ-RSLAUBRISA-N	878.572	447.783	0.377182	1.82457	0.791776	0.452267	0.566701	0.603799	2.15225	2.07874	1.06352	0.756342	0.885107	0.853298	2.36897	3.31596	2.19031	0.560555	0.640651	0.878481	0.746798	1.95895	1.25331	2.95057	0.636763	2.74159	0.525074	0.647795	0.505186	2.13931	2.42081	0.688083	2.73293	0.568885	2.07074	3.89909	3.10601	2.8798	3.70972	4.02428	0.807911	0.578584	2.35061	1.99919
8145	PI(18:0/20:3)	0.857618			GGSSNEAFVQRIHU-JTBMWNAQSA-N	887.563	383.209	0.137378	0.728984	0.332467	0.823258	0.607334	0.730485	1.0079	0.533464	0.858017	0.641421	0.432963	0.419539	0.415276	1.22968	0.530626	0.752921	0.597901	0.538669	0.560935	0.931681	0.640545	1.22851	0.64874	0.782448	0.723839	0.891787	1.00574	1.19871	0.844478	1.06711	0.829492	0.740545	0.514164	0.909718	0.68124	1.06343	1.42845	1.72158	0.760271	0.365457	0.717819	0.906176
6309	PE(16:0/22:6)	0.85451			MPWUZHVZZKSTPV-LGFBOSHVSA-N	762.507	399.571	2.3684	9.56047	8.46243	10.4527	15.2173	10.4303	12.8507	11.3347	17.8595	15.0181	14.2652	10.5077	9.63238	18.1792	12.1792	11.415	11.7262	7.24851	10.199	18.5337	11.872	21.0958	20.0908	25.4307	17.4177	15.495	9.71621	12.1739	15.4743	10.7428	14.3259	14.2223	8.11226	15.9555	21.2968	13.5293	16.1857	20.6932	18.6068	6.10005	11.1502	15.3908
6887	PE(18:2e/24:4)	0.853872			OKGOVGSTWBZMAD-DYTQRSFTSA-N	804.589	523.371	0.425582	0.930236	1.34214	1.87752	0.880444	1.65003	1.45291	1.21079	1.89994	1.16279	0.884194	1.25035	0.999095	1.64389	1.07734	1.55264	0.975235	1.42328	1.49987	1.96809	1.30532	1.87032	1.01787	1.65343	1.06014	1.84778	0.940168	1.54892	1.68464	2.05523	1.78572	1.69015	1.18563	2.11341	1.02345	1.32833	1.5216	2.29941	1.23679	0.946848	1.2407	1.50253
4193	Cer/AS(d18:1/16:0)	0.853664			YWZGQPJRQXHVQX-BYCLXTJYSA-N	598.504	431.767	0.20489	0.379086	0.228453	0.264212	0.161741	0.277654	0.148833	0.303877	0.237797	0.241117	0.304936	0.219898	0.237148	0.308705	0.342954	0.249733	0.217945	0.209153	0.263467	0.301879	0.255174	0.176363	0.184481	0.128912	0.266407	0.426542	0.200277	0.221837	0.216355	0.256378	0.21037	0.177915	0.20201	0.326923	0.16266	0.161262	0.209375	0.184789	0.2536	0.174562	0.255046	0.219803
7319	PI(17:1/17:1)	0.852833			NBJSYDLFENEDRE-IQRFGFHNSA-N	833.515	326.031	0.043704	0.208374	0.120657	0.190512	0.143856	0.213278	0.244652	0.22015	0.308843	0.121105	0.267281	0.113343	0.14079	0.253428	0.232243	0.292398	0.193071	0.107493	0.221975	0.248543	0.194285	0.406978	0.198174	0.391533	0.23506	0.155766	0.181368	0.277368	0.17688	0.189837	0.330763	0.224545	0.133923	0.324428	0.280201	0.217073	0.465538	0.44761	0.230373	0.0913339	0.147094	0.255292
8494	PI(20:2/20:2)	0.852543			FBAQYCRLNDMSDI-MAZCIEHSSA-N	913.573	368.983	0.0127133	0.0603846	0.0690148	0.0761786	0.0528567	0.0687773	0.113404	0.047206	0.111487	0.0780798	0.0454943	0.0345433	0.0532183	0.124039	0.0630994	0.09278	0.0786986	0.0509327	0.0654269	0.124382	0.0711358	0.100582	0.0527457	0.0804593	0.0497109	0.0797006	0.0996941	0.113181	0.0878736	0.120618	0.122171	0.0721367	0.0685591	0.111751	0.077395	0.0913335	0.158076	0.191898	0.0721686	0.0328708	0.0435626	0.0913244
6014	PE(18:0/18:2)	0.851137			YDTWOEYVDRKKCR-MLWYYCKJSA-N	742.54	466.818	15.1696	41.4162	28.7065	39.8829	35.1473	40.3578	41.4371	34.1672	38.2519	46.4829	48.2121	21.8079	31.3683	53.1646	38.1327	46.1672	33.1708	24.5825	40.318	49.0222	37.3483	51.2915	35.3629	34.1807	33.7	29.3469	38.6442	37.5722	50.4047	35.1967	34.7782	41.4969	29.522	42.5386	33.7607	33.0649	56.518	60.3004	42.5778	18.9086	42.2098	39.0688
4048	LPC(20:4)	0.848476			GOMVPVRDBLLHQC-DOFZRALJSA-N	588.331	75.5024	0.190595	1.0496	0.561691	0.654136	0.702592	0.994169	1.02782	1.47951	1.82461	0.922867	2.25477	0.626576	1.00846	1.32816	1.28897	1.5178	0.79152	0.945862	0.847378	1.66273	1.08399	0.972208	0.797921	1.11738	0.437105	1.03959	0.638861	1.54035	1.44267	0.861606	1.73625	0.587506	1.19339	1.33369	1.61562	0.825653	1.94053	0.791183	1.42508	0.397423	0.816136	1.07551
8314	PC(20:4/22:5)	0.847945			FDDWZRUXIMATBC-WCSWXZRRSA-N	900.575	389.644	0.0130423	0.30937	0.237392	0.194452	0.196195	0.305389	0.488082	0.375841	0.540374	0.439841	0.0149045	0.0115911	0.473012	0.384247	0.446739	0.17254	0.396888	0.527677	0.218769	0.569699	0.315802	0.231313	0.28104	0.00626776	0.210531	0.207281	0.252511	0.411678	0.310717	0.395341	0.592999	0.23247	0.0143017	0.516782	0.639063	0.253212	0.0143125	0.530628	0.32518	0.113574	0.177073	0.285814
6678	PE(18:0/22:6)	0.846293			XYYHNDVKALDFHQ-HSBBONCLSA-N	790.538	447.71	3.11895	18.0186	17.1943	8.39445	12.3857	17.9316	25.343	24.4597	27.7014	27.2189	25.487	17.5704	15.6123	30.9924	21.3339	14.9357	20.6494	11.9586	15.9518	27.1242	19.1691	21.674	19.2945	30.5786	14.7579	13.9669	13.6966	19.0747	26.728	15.2478	33.1665	20.0312	16.7184	29.6521	28.5275	20.2671	30.8411	28.1158	32.8774	6.9319	17.7783	21.9963
6802	PE(22:5e/20:4)	0.844438			AJPHFYDPHWKZBN-JZSROXHHSA-N	798.563	392.51	0.00553743	0.114203	0.0231849	0.158819	0.0624524	0.0651255	0.0634857	0.0959617	0.0671456	0.0323906	0.121289	0.0333738	0.067429	0.0649819	0.0695832	0.100105	0.168205	0.0461491	0.0331187	0.104137	0.0748339	0.108223	0.0659653	0.0656447	0.0522137	0.102122	0.0508051	0.0447705	0.115605	0.0252878	0.083125	0.0458847	0.0603438	0.0725298	0.0873162	0.0273674	0.0957342	0.0540752	0.066483	0.0240861	0.0540955	0.0650839
7851	SQDG(16:0/22:4)	0.841666			GLPNHCGGPKDFJQ-BHYOAKPMSA-N	869.534	277.204	0.0131224	0.0876223	0.157221	0.0274626	0.14226	0.0953315	0.170821	0.128182	0.249035	0.152327	0.117068	0.121473	0.0115562	0.17969	0.159422	0.0849939	0.126517	0.108194	0.0936487	0.287027	0.125649	0.10876	0.0857069	0.189181	0.0974125	0.122781	0.0876143	0.185556	0.157302	0.132924	0.118459	0.13906	0.229753	0.141721	0.0763768	0.0902422	0.151184	0.172394	0.114246	0.0478351	0.126056	0.128728
8303	PC(20:3/22:6)	0.840635			UOHAUYMPRRFULX-WJAHOPGDSA-N	900.575	376.921	0.0449699	0.76012	0.271214	0.332794	0.301673	0.26818	0.519818	1.04253	1.41461	0.52483	0.765478	0.600899	0.688877	1.01173	0.504359	0.31116	0.368437	0.0698486	0.302987	0.535071	0.531979	0.412919	0.455982	0.638927	0.503692	0.481974	0.369909	0.714886	0.435037	0.245674	0.490418	0.723351	0.927116	1.1323	1.49825	0.594934	0.727175	0.996804	0.825341	0.101448	0.569145	0.642264
6474	PE(18:3e/22:4)	0.839708			QWALPKWDJZTXCQ-VNFIBVKGSA-N	774.584	409.091	0.327985	0.682723	0.508988	0.785289	0.66295	0.650467	0.738245	0.717138	0.850422	0.70445	0.731505	0.642928	0.656843	0.838019	0.529554	0.781638	0.79077	0.514063	0.708776	0.770915	0.679683	0.804423	0.553633	0.615283	0.667484	0.532479	0.59975	0.631821	0.732822	0.76675	0.55332	0.545548	0.803976	0.644158	0.489432	0.690092	1.04854	0.927848	0.733388	0.632363	0.533911	0.675351
8278	PC(20:4/22:6)	0.838088			NCCFWEYCQVRLBU-QIKGRQGGSA-N	898.56	353.399	0.364206	3.11252	2.09861	0.791004	1.71134	1.76324	2.35179	3.68203	5.27074	3.53616	4.35057	2.52173	1.98007	3.52152	2.4231	1.56578	2.38785	2.4345	1.86328	3.17876	2.54544	2.45791	2.8045	3.66776	2.31775	2.11821	2.5722	3.30519	2.32666	2.10568	3.49458	3.17226	2.04866	6.03633	4.14497	2.58597	1.81374	4.24555	2.91651	1.07076	2.58234	2.88938
6361	PE(18:1/20:3)	0.836537			FHPKJOCRZAXOEW-ZYKQNZMBSA-N	766.539	438.073	1.24972	5.51088	3.26938	5.78579	6.11747	2.89166	4.20316	3.90376	4.74633	4.0934	4.25104	2.73948	5.0875	6.56571	4.37407	5.12264	3.62123	2.83052	4.64123	6.19471	4.35998	4.91477	4.16268	3.06214	8.31481	4.49568	4.70702	6.34719	5.59534	4.84139	3.70227	5.23033	3.6227	5.21728	5.79182	7.05427	5.69586	7.74609	4.18619	2.42538	5.42993	5.12716
3789	Cer/NS(d18:1/18:0)	0.834998			VODZWWMEJITOND-OWWNRXNESA-N	564.535	500.346	0.0809475	0.205098	0.096455	0.176564	0.130238	0.225927	0.155452	0.193361	0.420784	0.316351	0.228238	0.230662	0.162031	0.342233	0.210776	0.200087	0.275002	0.174641	0.241415	0.267562	0.216691	0.277937	0.222533	0.129796	0.188404	0.213309	0.235657	0.173679	0.173415	0.197791	0.127636	0.181224	0.165608	0.237427	0.10234	0.160715	0.325501	0.248229	0.293332	0.18358	0.247223	0.204267
6658	PC(16:0e/18:2)	0.831803			IQACMFWAGALEAQ-DYMXKLMASA-N	788.581	497.063	1.43257	2.62052	2.13861	1.66544	1.90911	2.2595	2.28002	2.49317	3.56776	2.47256	2.95631	2.64305	1.92009	2.84623	2.32298	2.30647	2.22659	2.45369	2.74335	2.66782	2.39629	3.18105	1.93343	2.30563	2.06417	2.04003	2.10573	2.21699	2.74832	2.18423	2.7637	1.74112	1.56733	3.52653	2.06606	1.8839	3.83322	2.77369	2.6928	1.50604	2.3617	2.37478
6834	PC(16:1/18:2)	0.830041			QJWDAOSZZYVBJZ-BOAYSYCPSA-N	800.545	379.789	1.02191	2.41669	1.07308	2.29506	1.51577	1.36473	1.6337	1.58194	1.6365	1.35256	2.03533	0.988855	1.58384	2.12003	1.54041	2.66267	1.46909	1.31602	1.64054	1.94241	1.65956	2.75475	1.30031	1.17407	1.77317	1.74445	1.76414	1.64124	1.9079	1.63672	1.52303	1.80893	1.14231	1.98112	1.37504	1.92954	2.23919	2.56346	1.84361	1.5037	1.76788	1.76873
6704	PE(18:0/22:5)	0.829519			KYERVKWKQQBRQB-NIZIMQIGSA-N	792.554	476.98	1.63825	3.99201	7.04014	5.13597	3.61324	5.3447	11.7375	6.56765	5.31621	7.7832	7.23799	2.48651	9.76935	7.48287	7.11341	3.74584	7.84427	8.19559	8.98392	10.9627	6.59957	4.82098	3.89364	4.19706	4.43209	3.97431	3.94497	5.53013	6.47219	8.82356	9.98386	3.48	6.99985	7.4383	8.53899	6.83632	9.20708	8.24003	6.3991	3.03458	3.26861	5.97578
9374	SQDG(21:0/26:4)	0.826261			YWGIDVISSWRBJL-GAVJZRLKSA-N	995.667	599.899	3.38177	9.38874	6.8637	7.64271	7.44326	8.07291	8.38179	9.68923	9.36519	10.1845	10.4282	6.61154	9.12711	10.8344	8.18507	8.64383	8.04816	7.06031	8.31454	11.2757	8.44714	9.20253	9.6033	9.23749	8.92056	7.80741	7.65865	9.12658	10.6175	7.89161	9.65275	8.1674	8.86156	9.97654	10.4374	8.16508	9.81894	11.0894	9.77328	5.06415	7.57718	8.93246
9220	SQDG(20:0/26:4)	0.826261			KOSZTTNDIWQDST-YZVDMUQZSA-N	981.65	581.578	0.530592	2.07537	1.31923	1.74224	1.89304	1.62169	1.85448	2.20737	2.39656	2.00066	3.00929	1.49132	1.89251	2.24568	1.67568	2.15677	1.58427	1.20506	1.80151	2.36883	1.85361	2.2123	1.87744	2.27759	1.64924	1.53156	1.52559	1.77351	2.42798	1.49287	2.166	1.5917	1.63345	1.9055	1.98199	1.47337	2.28572	2.17532	2.50377	1.06786	1.29192	1.84223
9348	SQDG(21:1/26:4)	0.826261			SPOCCRFOIILYIB-KQVRDVJSSA-N	993.651	564.165	1.63752	4.573	2.56411	3.14684	3.12122	3.16358	2.95713	3.56166	4.64559	3.04623	4.14204	2.99158	3.52247	3.67264	1.72016	3.5892	3.43011	2.51684	2.9186	4.05375	3.24871	3.91297	2.87816	3.72176	3.13382	2.96392	2.6538	3.19805	6.31077	3.0401	3.64625	2.9664	5.26574	4.72522	3.66121	2.48795	4.24985	3.96858	3.54152	1.77048	3.05759	3.55771
8066	SQDG(13:1/26:4)	0.826261			DOPRZFNYHGLALX-VEXKFZTGSA-N	881.524	522.474	0.0222268	0.0216994	0.0295782	0.030988	0.019412	0.04031	0.0230377	0.0246637	0.0389178	0.0137019	0.0302811	0.042031	0.0138347	0.0179546	0.0255831	0.0446334	0.0186251	0.0176911	0.017714	0.0362307	0.0264557	0.0495204	0.024865	0.0328394	0.0157264	0.0284866	0.0353215	0.0235876	0.0195169	0.0420766	0.0284036	0.0183194	0.0247466	0.0266239	0.0206576	0.0375278	0.0261839	0.0324362	0.0140108	0.0205131	0.0244808	0.0272922
7995	SQDG(17:1/22:6)	0.826261			ZLKMWNHGWGFVHP-VFVAPGIQSA-N	877.5	432.12	0.0448019	0.103163	0.0536334	0.0836196	0.080624	0.0492134	0.0576641	0.0822495	0.0558435	0.0726964	0.0524532	0.0499025	0.111678	0.0948891	0.075661	0.0772918	0.0575658	0.0484985	0.100142	0.0908263	0.0721208	0.054799	0.0998076	0.0545404	0.0925753	0.0492562	0.0599331	0.0614293	0.085569	0.0668916	0.0366139	0.0772549	0.0757485	0.0618012	0.0837203	0.0595508	0.0574592	0.0829619	0.071091	0.0395763	0.0845511	0.0677565
7474	SQDG(14:0/22:3)	0.826261			YJMVTUPTALUFSD-NKTIKPMXSA-N	843.548	414.61	0.181386	0.294382	0.322325	0.280837	0.317788	0.34527	0.342671	0.323271	0.387914	0.328094	0.331529	0.341458	0.288918	0.318149	0.313941	0.279625	0.32991	0.286351	0.302088	0.32129	0.31186	0.280849	0.312036	0.335174	0.305196	0.303214	0.288539	0.301858	0.358104	0.333392	0.302017	0.293964	0.30478	0.335703	0.300745	0.295196	0.277144	0.299196	0.284514	0.260498	0.299021	0.303557
7891	SQDG(14:1/24:2)	0.826261			XNABGUPRFIJMGT-MLVGEXJWSA-N	871.569	375.115	0.0168334	0.0689657	0.0470485	0.0730519	0.0561211	0.0834842	0.142624	0.0634601	0.0925186	0.0834753	0.136802	0.0350024	0.041299	0.0767911	0.0538227	0.118243	0.0561494	0.0479468	0.0643417	0.115367	0.0736674	0.0878865	0.0601274	0.201136	0.00582771	0.0632643	0.0406941	0.0958607	0.0870684	0.110735	0.0968817	0.081152	0.103684	0.147785	0.0831071	0.0503693	0.201962	0.142289	0.0815972	0.0201065	0.0329976	0.0897266
7853	SQDG(16:1/22:3)	0.826261			WIUKLVRPYRRPAT-PHLVFGIESA-N	869.532	293.768	0.011677	0.0460436	0.108083	0.114191	0.107596	0.0681396	0.169796	0.0628422	0.158055	0.121118	0.100936	0.0314658	0.123017	0.120159	0.149796	0.0762059	0.164007	0.169071	0.0942826	0.315486	0.115598	0.0737705	0.0615659	0.0741513	0.0448834	0.070717	0.100276	0.119338	0.109834	0.142863	0.138664	0.0441518	0.178871	0.0975764	0.0729728	0.0556876	0.126011	0.131005	0.0903059	0.0579796	0.0613724	0.0925998
7798	SQDG(16:1/22:5)	0.826261			CUPZRYCNXPPNJZ-YNVIVDAUSA-N	865.543	241.62	0.0175416	0.0468548	0.00483512	0.0472381	0.0200606	0.033246	0.0129919	0.0635681	0.0249742	0.00278888	0.0579214	0.0074446	0.0300821	0.0224567	0.0369486	0.0498429	0.0192815	0.0165094	0.00796503	0.0422229	0.0282387	0.0307445	0.0487562	0.0274495	0.01916	0.0299792	0.0301011	0.00977192	0.0488711	0.00620856	0.018506	0.0115646	0.0297602	0.0215501	0.0470374	0.0209943	0.01916	0.00645529	0.0232051	0.00877566	0.0207987	0.0239425
6424	PG(16:0/20:3)	0.824959			CLWMQONPFNUMKX-SVNQLWEDSA-N	771.537	364.193	0.01942	0.027941	0.0233775	0.0447507	0.0228644	0.0307025	0.0352985	0.0225531	0.0185913	0.0400639	0.0382337	0.04228	0.028818	0.0339818	0.017572	0.072962	0.0244853	0.0221767	0.0496199	0.0268221	0.0321257	0.0316965	0.0200921	0.0121171	0.0113017	0.01771	0.0313168	0.0144262	0.0237626	0.0612606	0.0135863	0.0244153	0.0200302	0.0173892	0.0116031	0.0214216	0.0467018	0.0539099	0.0280485	0.043522	0.0196666	0.0261989
7661	HexCer/NS(d18:1/24:0)	0.823359			POQRWMRXUOPCLD-MHAUTQJVSA-N	856.689	565.51	1.0437	1.59461	1.05149	2.52261	1.50158	1.71967	1.64854	1.94121	1.65453	1.65523	1.86936	1.57912	2.64797	2.28006	1.31802	2.50858	1.8519	1.35031	1.75298	2.01654	1.7754	2.27074	1.46566	1.70024	1.22231	1.88675	1.3908	2.03758	2.11625	1.55679	1.75607	1.1907	1.38804	0.923016	1.23411	1.39444	2.16949	1.86592	2.24039	1.34135	1.60246	1.63766
7677	SM(d30:1/12:1)	0.82145			ZSPBFLVFLNGAFX-NARKQJJSSA-N	857.676	633.054	0.158251	0.556667	0.348378	0.350193	4.6289	4.0313	0.355377	0.850472	0.504991	0.592303	0.50191	0.3236	0.363081	0.737343	0.396611	0.39344	0.45502	0.337	0.461475	0.578139	0.846222	0.403412	0.353116	0.388177	0.410289	0.399125	0.356888	0.424603	0.616318	0.356617	0.426015	0.309601	0.297018	0.80092	0.627724	0.334293	0.564874	0.415297	0.406199	0.229083	0.33414	0.422685
8416	OxPI(16:0/20:3+3O)	0.820911			GFFQEFBOLBUUNT-RVKPKNHYSA-N	907.523	260.654	0.00677379	0.036165	0.0424164	0.0422448	0.0176409	0.0768498	0.0764685	0.0251139	0.0781036	0.0365547	0.0495892	0.0657437	0.021633	0.0436965	0.0271219	0.0408047	0.027336	0.0178062	0.0258497	0.0570809	0.0407497	0.0285596	0.0307546	0.0382804	0.054954	0.0331835	0.0502979	0.075283	0.036221	0.081205	0.044636	0.0943903	0.0518081	0.196824	0.0460153	0.0553991	0.224542	0.192457	0.0229496	0.0185091	0.0281909	0.070223
6963	PI(16:0/16:0)	0.818839			IBUKXRINTKQBRQ-UHFFFAOYSA-N	809.518	337.234	0.156112	0.688835	0.495964	0.872449	0.54907	0.710832	0.90963	0.599267	0.998248	0.685498	0.761303	0.466743	0.502071	0.895548	0.613003	1.01498	0.597577	0.413533	0.618478	1.16876	0.685895	0.801757	0.59977	1.17995	0.5213	0.668726	0.479257	0.821038	0.806716	0.716629	0.812417	0.911903	0.537381	1.65842	0.605132	0.585595	1.14112	1.36486	0.733315	0.323883	0.455438	0.78623
6692	GlcADG(16:0/20:4)	0.818372			OUYBCIUMAYONRH-JAXHXWBXSA-N	791.54	447.715	1.52545	8.9317	8.65214	4.10143	6.04515	8.9404	12.5916	12.2323	13.6681	13.4852	12.6446	8.71652	7.81582	15.2112	11.8919	7.3813	10.1264	5.87459	8.05809	13.4305	9.56622	10.4866	9.30725	15.1679	7.2068	6.89279	6.87347	9.28655	13.4796	7.47052	16.5866	9.7779	8.04307	14.4308	14.2792	10.0873	15.0969	13.7989	16.073	3.32408	8.93419	10.8302
4149	Cer/AS(d18:2/16:0)	0.817946			BGCIWBMYVKHZNX-PQWGFPSMSA-N	596.488	388.83	0.049212	0.289614	0.173089	0.172068	0.136473	0.231856	0.107164	0.370522	0.288627	0.229238	0.369352	0.267597	0.260074	0.37073	0.361289	0.321931	0.210715	0.169167	0.34569	0.497776	0.261109	0.229996	0.173013	0.191846	0.253972	0.410924	0.238766	0.135622	0.198164	0.172426	0.226412	0.162617	0.172686	0.349735	0.128717	0.148579	0.275743	0.168663	0.302797	0.15491	0.361249	0.222842
8391	OxPI(16:0/20:4+3O)	0.817027			ONIDDGZTAMHXSO-KVBJYXNOSA-N	905.517	260.467	0.0475173	0.217806	0.237696	0.249342	0.106275	0.442633	0.428933	0.160416	0.440412	0.218544	0.290045	0.384976	0.135161	0.252889	0.159073	0.254938	0.165178	0.121442	0.164661	0.33587	0.24069	0.184096	0.194023	0.238109	0.310239	0.199003	0.298051	0.46411	0.225566	0.477379	0.280617	0.549697	0.315439	1.18357	0.270636	0.363332	1.29752	1.00449	0.149127	0.114012	0.176469	0.414774
4438	LPI(20:4)	0.816251			BAWAZBRKENFJED-LTKCOYKYSA-N	619.289	51.1679	0.00833706	0.180124	0.118765	0.204405	0.132061	0.276617	0.363111	0.214461	0.515846	0.319244	0.533387	0.0827263	0.168222	0.452614	0.249941	0.51788	0.14282	0.134363	0.258211	0.454677	0.266391	0.249333	0.163577	0.477357	0.0786764	0.0976402	0.149347	0.337569	0.30049	0.200627	0.515433	0.314622	0.182341	0.558108	0.278376	0.186674	1.18043	0.507127	0.347899	0.0393928	0.13008	0.314755
5621	SM(d14:0/18:2)	0.810349			FPCCCNYTYPMAFM-LJSPAGPLSA-N	717.52	288.481	0.0697897	0.230595	0.106837	0.169834	0.141728	0.159356	0.201271	0.241047	0.192061	0.162386	0.25863	0.146271	0.171227	0.207101	0.174578	0.246148	0.171338	0.164566	0.193608	0.213994	0.181118	0.286325	0.167336	0.178897	0.149213	0.268356	0.202354	0.205817	0.221382	0.185525	0.195421	0.217958	0.176889	0.237094	0.170864	0.164627	0.326119	0.268997	0.20256	0.14346	0.136362	0.205278
6408	PE(18:3e/22:6)	0.80873			JQLOIOOYOCUUJK-UDJFDMGOSA-N	770.512	390.39	0.275852	2.07455	2.20065	2.05113	1.1437	2.12878	3.15695	2.0335	4.27782	4.87919	4.09756	0.883758	1.17528	6.99284	2.81114	2.647	1.62203	1.30731	3.48767	5.05393	2.71503	5.37143	1.80268	2.63525	1.00709	1.29164	2.203	2.61568	2.47346	1.78753	3.84739	2.65988	1.59379	3.90438	4.3785	1.63574	9.07246	6.98397	4.39144	0.79319	2.10662	3.12776
6467	PG(16:0/20:2)	0.807725			KDFIYBDWNQKADP-BCTRXSSUSA-N	773.522	390.622	0.00606511	0.0587242	0.0588238	0.0584357	0.0296368	0.0541347	0.0757753	0.0552502	0.121202	0.12954	0.103842	0.0196095	0.0281313	0.19007	0.0670514	0.0596432	0.040452	0.0311188	0.0949922	0.139814	0.0711156	0.154679	0.0539534	0.0753456	0.0166307	0.0342914	0.0615157	0.0632114	0.0563222	0.0445045	0.0975779	0.068701	0.0388585	0.0995204	0.1075	0.0451861	0.23364	0.190324	0.100767	0.0158315	0.0500688	0.0804215
6249	PS(16:0/18:2)	0.805969			ZGNVQERQNSXHHO-BCTRXSSUSA-N	758.533	316.79	0.0137555	0.0627603	0.00597206	0.0317178	0.0428304	0.0257549	0.00866691	0.0323954	0.00431806	0.00431718	0.0315933	0.00925343	0.0303723	0.0229923	0.0334761	0.0422317	0.0124483	0.0118685	0.00181052	0.0481179	0.0238326	0.0341261	0.0136514	0.0184248	0.0189822	0.0268173	0.0275386	0.008516	0.0310664	0.00781637	0.00191927	0.0131474	0.0131611	0.0204198	0.0116017	0.0221048	0.0236788	0.00366827	0.0182422	0.00923563	0.0270664	0.0175592
4682	Cer/NS(d18:1/24:1)	0.803285			FUWLDBVRSLAFFJ-DBOQMASJSA-N	646.611	574.086	0.209435	1.00753	0.717788	0.798522	0.363654	0.484919	0.38979	1.25469	1.52996	0.972342	1.24018	0.895441	1.04088	1.23619	1.15687	1.26573	0.466798	0.763319	1.05708	1.03926	0.894518	0.511249	0.7589	0.725319	0.667875	0.932198	0.40566	0.384236	0.845648	0.641251	0.886944	0.622881	0.412824	1.54005	0.865641	0.540687	0.557808	0.846804	0.529334	0.432154	1.00654	0.7057
6323	GlcADG(16:2/18:2)	0.800944			VZAXGXOMFCLMNC-ZJCTUUHQSA-N	763.511	399.528	1.12664	4.42921	3.90676	4.03963	4.10781	4.87633	6.16027	6.42927	9.73467	7.13974	6.8786	4.89872	4.56383	8.63618	5.76262	5.50115	8.59205	3.41026	4.82934	8.82718	5.69251	9.72288	5.01036	11.7033	5.01585	7.07716	4.52351	5.87645	7.1591	5.20364	6.73254	6.81641	3.87635	7.67345	5.72726	6.37077	7.6896	9.8471	11.1641	2.95134	5.29096	6.7716
6758	PG(18:1/20:4)	0.8002			ODHQFFNXKQCMPG-HAGCXRLMSA-N	795.516	294.84	0.0571441	0.155065	0.214827	0.25921	0.142189	0.157929	0.159071	0.134355	0.197231	0.135056	0.220675	0.10815	0.151026	0.108053	0.134735	0.183835	0.128412	0.147689	0.158422	0.275986	0.161453	0.156687	0.135003	0.154813	0.132927	0.216705	0.0860958	0.162541	0.129701	0.142322	0.184076	0.156811	0.121515	0.191798	0.107926	0.0802088	0.226684	0.105934	0.109696	0.0838862	0.104218	0.139477
7103	GlcADG(18:2/20:2)	0.799278			AJMMMSIFIWPFST-QWRCKZSHSA-N	819.55	426.824	0.205992	0.302062	0.31067	0.348076	0.307379	0.27899	0.290451	0.273995	0.299745	0.364231	0.382055	0.283991	0.284267	0.407925	0.322673	0.423529	0.277789	0.28426	0.3038	0.348858	0.315037	0.366817	0.349653	0.321245	0.301996	0.29366	0.341163	0.273529	0.399879	0.282745	0.312725	0.28012	0.244871	0.287306	0.26137	0.301264	0.299277	0.42559	0.347769	0.309145	0.344901	0.317251
7246	HexCer/NS(d18:1/22:0)	0.798938			YIGARKIIFOHVPF-LAPDZXRHSA-N	828.658	531.744	0.880819	0.858624	0.742577	1.5396	0.8601	1.30632	1.03263	1.22365	1.05975	1.17876	0.995881	1.04528	1.70016	1.49264	0.757972	1.50016	1.00383	0.810658	1.02744	1.09568	1.10563	1.7671	0.861302	1.14007	0.798523	1.18889	0.836973	1.34863	1.19998	1.11665	0.93916	0.710581	0.758531	0.63414	0.745376	1.00349	1.33233	1.27556	1.33537	0.464636	0.954592	1.02059
6486	PG(18:0/18:1)	0.798907			ZEFGRNLJASLRBZ-ZZEZOPTASA-N	775.586	408.945	0.0780843	0.134619	0.107839	0.193763	0.13632	0.148388	0.167774	0.152399	0.190313	0.16535	0.189971	0.145336	0.143602	0.201503	0.134105	0.18171	0.181652	0.112594	0.16637	0.159271	0.154548	0.180814	0.135592	0.136155	0.158161	0.11536	0.142394	0.155263	0.149089	0.176263	0.125405	0.118883	0.212335	0.15628	0.107903	0.158248	0.260548	0.200879	0.164882	0.146442	0.110157	0.155553
6126	PE(22:5e/16:0)	0.798454			VVZUFEJKEIYRIT-WHQAFXCMSA-N	750.529	398.643	0.846144	1.61023	1.31516	1.61233	1.26196	1.43525	1.38018	1.43545	1.62534	1.27964	1.79322	1.0618	1.19986	1.55149	1.292	1.42879	1.36121	1.33718	1.26378	1.55313	1.38221	1.73319	1.27449	1.39903	1.28743	1.32392	1.35482	1.3034	1.60965	1.45562	1.4305	1.28446	1.04449	1.48434	1.42592	1.2497	1.71064	1.604	1.45519	0.930854	1.28332	1.38225
6269	PE(16:1/22:6)	0.797571			PMUXXFUNXMXIFC-LSTLUVPYSA-N	760.492	354.062	0.111692	0.917655	0.331337	0.34826	0.319107	0.307945	0.355124	0.665372	0.672638	0.446637	0.618683	0.408032	0.648645	0.555192	0.45209	0.66499	0.467242	0.325694	0.536273	0.648816	0.490071	0.548721	0.445826	0.451918	0.738615	0.381143	0.36043	0.621456	0.664786	0.245475	0.487168	0.663224	0.266747	0.846393	0.641124	0.501963	0.602888	0.502987	0.795397	0.222216	0.476046	0.523226
7470	GlcADG(18:2/22:4)	0.796588			FECMKBMOUFCXBM-POQXSWCRSA-N	843.578	448.817	0.0231596	1.20802	0.0385225	0.0422993	0.0330249	1.24557	0.0669034	0.024668	1.66963	0.0403188	0.0364354	0.989137	0.0281293	0.0470897	0.0631725	0.0451491	0.0542689	0.0534	0.0780755	0.097989	0.294248	1.63253	0.0227206	0.0503711	1.36139	0.0455052	0.0379967	0.935093	0.0600501	0.0634878	0.0666767	0.0369788	0.045416	0.111293	0.051139	0.0298069	1.56524	0.0725834	0.0725298	1.32131	0.0249953	0.380356
4698	Cer/NS(d18:1/24:0)	0.796173			ZJVVOYPTFQEGPH-MHAUTQJVSA-N	648.626	605.905	0.26814	1.2394	0.676632	0.93023	1.03121	1.09225	1.07947	1.35613	1.36922	1.54794	1.69765	0.959828	1.62163	1.94573	1.4125	1.78535	1.29673	0.924827	1.2928	1.94094	1.27343	1.10323	1.19852	1.11407	1.1572	1.25872	0.952709	1.22214	1.60922	0.94891	1.28911	1.20053	1.18228	1.5216	1.29019	1.09259	1.24381	1.51559	1.52848	0.577875	1.24868	1.21277
4456	Cer/NS(d18:1/22:0)	0.79537			KEPQASGDXIEOIL-LAPDZXRHSA-N	620.596	574.71	0.199672	0.906911	0.346793	0.630661	0.569418	0.734999	0.673978	0.895518	1.15928	1.08134	1.21166	0.589544	0.887407	1.37046	0.870704	1.05122	0.812021	0.561796	0.893451	1.19888	0.832286	0.869508	0.823495	0.756913	0.704842	0.979436	0.668582	0.71932	0.954545	0.64864	0.761819	0.844813	0.63762	0.865828	0.628785	0.640963	0.960007	1.04866	1.09056	0.414918	0.84751	0.793338
8309	OxPC(18:0/20:5+3O)	0.794863			KNMNGMSGDJRFLI-IGYJEKOXSA-N	900.564	353.436	0.062594	0.562684	0.368538	0.139238	0.291603	0.323012	0.423984	0.631674	0.949877	0.598644	0.764101	0.452192	0.326214	0.622802	0.419682	0.277445	0.410653	0.404584	0.328098	0.555452	0.445653	0.417106	0.469937	0.648512	0.397521	0.379217	0.448071	0.563747	0.463213	0.36788	0.599752	0.545574	0.350757	0.998333	0.724463	0.452743	0.643215	0.727523	0.501556	0.188303	0.459369	0.51734
6319	GlcADG(14:0/20:4)	0.79445			GJJWTBASSVVZTN-WNXRHBFNSA-N	763.56	374.568	0.364739	0.654367	0.778484	0.430098	0.334789	0.383797	0.173425	0.542622	0.301253	0.35336	0.688483	0.223739	0.293564	0.43007	0.326281	0.236903	0.23633	0.260395	0.40249	0.397128	0.390616	0.586391	0.190089	0.318552	0.420622	1.17794	0.359964	0.339495	0.35302	0.397921	0.367208	0.217859	0.224083	0.531494	0.334303	0.345429	0.256053	0.3319	0.406828	0.177359	0.272513	0.380451
7551	PC(16:1/22:6)	0.791607			DLRNZUPJXRVWRW-LKDYKOESSA-N	848.55	328.421	0.00495786	0.00996212	0.0111195	0.00502563	0.0120286	0.019866	0.0177074	0.00270648	0.00429486	0.0185211	0.0100907	0.00467584	0.00312417	0.0138342	0.0100338	0.0201702	0.00783761	0.00308978	0.0107296	0.0227026	0.0106239	0.0180726	0.00709152	0.0131577	0.0087545	0.00684209	0.00767101	0.0065971	0.00860723	0.0160939	0.0160055	0.0176339	0.0109048	0.021381	0.00394821	0.00464101	0.0526931	0.018635	0.00462001	0.00389594	0.01106	0.0129153
6049	SM(d14:0/20:2)	0.791317			XALYQDLMCGTQFI-JHHNDBJRSA-N	745.567	402.83	0.809355	0.63849	0.626226	1.08744	0.590084	0.628221	0.69465	0.709083	0.51496	0.486839	0.514529	0.87539	1.08503	0.494313	0.490878	0.872774	0.798967	0.713777	0.632457	0.41078	0.683712	0.669178	0.470241	0.439674	0.538442	0.785912	0.559158	0.563297	0.518737	0.724286	0.506549	0.555973	0.455846	0.25665	0.427189	0.461169	0.510086	0.525105	0.596334	1.37679	0.641583	0.57911
5387	Cer/BS(d23:3/22:1)	0.789941			QTLQRQOOMYMPFP-KTCMQQNJSA-N	700.6	509.109	0.0132519	0.0730413	0.055205	0.0590799	0.0450483	0.10009	0.0223841	0.0638363	0.0697229	0.105031	0.0393833	0.0796092	0.0376259	0.0554774	0.0893929	0.0473759	0.0682895	0.0375028	0.0703781	0.0854945	0.060861	0.018332	0.080788	0.0254694	0.0451383	0.0752359	0.0596289	0.0463323	0.0255606	0.0578507	0.0388522	0.0638257	0.0414322	0.0503441	0.0309458	0.0378599	0.0367842	0.0387218	0.0317252	0.061568	0.0604255	0.046341
6475	PE(18:2e/22:5)	0.787904			ZGFRFFVTVBULAT-WHFSXHQCSA-N	774.543	469.851	6.92169	23.2962	19.0578	14.9021	17.8006	28.8261	34.1888	27.1507	43.1697	30.3651	32.7305	27.8926	24.5553	34.1812	22.0764	33.9746	31.0352	19.8159	30.6331	33.8805	26.8227	41.3244	25.7414	33.676	20.977	21.9323	26.6621	25.6869	34.3437	31.9025	30.1493	32.7007	23.8139	36.5774	31.5876	25.8216	37.8752	29.2968	39.4696	17.5704	26.7752	29.6942
8100	SM(d14:1/30:2)	0.785123			IAHKUQWEYHGJNQ-DICSMDBXSA-N	883.689	560.439	0.509298	2.28795	1.51939	2.63084	1.52441	2.12722	1.95204	1.79298	1.79366	2.31506	2.56891	1.11591	1.38334	2.62397	2.06325	1.81509	2.35135	1.19115	2.037	2.30972	1.89563	2.64061	1.69969	1.19034	1.64559	1.55981	1.92852	1.86656	2.30165	1.40353	2.12208	1.58228	1.45293	2.08329	2.36512	1.49391	3.1872	3.15067	2.0057	0.86429	1.67925	1.91115
5784	Cer/AP(t28:0/14:1)	0.784545			VMFPHTQVUFTLJB-BENRWUELSA-N	726.624	531.242	0.0959328	0.598278	0.425634	0.495605	0.308424	0.33762	0.371791	0.629013	0.912776	0.462731	0.760719	0.374785	0.481582	0.723542	0.493627	0.733147	0.357537	0.405232	0.375754	0.87367	0.51087	0.513384	0.349078	0.45856	0.376123	0.486302	0.423667	0.377596	0.489329	0.381255	0.455109	0.3952	0.253498	1.06494	0.529453	0.345463	0.521754	0.384893	0.459088	0.188258	0.502974	0.447796
6293	MGDG(13:0/18:0)	0.782395			OLNAJNRMLAUTTD-UHFFFAOYSA-N	761.553	403.674	0.235837	0.140293	0.191769	0.30752	0.131495	0.170901	0.202591	0.217185	0.140362	0.125383	0.15215	0.237921	0.285607	0.119295	0.142502	0.213328	0.222662	0.171126	0.186549	0.126542	0.186051	0.190845	0.125239	0.139918	0.14215	0.191472	0.129726	0.165014	0.162669	0.185855	0.166459	0.132565	0.126871	0.0802603	0.116853	0.123803	0.128742	0.142314	0.155841	0.378068	0.179681	0.158217
8125	SM(d14:0/30:2)	0.781939			RFMMSCVQRZGBNB-HLEFPVAISA-N	885.704	609.721	0.406139	1.42286	0.616551	1.10628	1.02357	0.862849	1.21695	0.96485	1.14872	0.951177	1.16246	0.966348	0.674201	0.982935	1.02206	1.13249	1.33002	0.90476	0.983295	1.35983	1.01192	1.43628	0.89952	0.885238	0.896019	0.958632	0.573212	1.38403	1.34219	0.913347	1.13763	0.991898	0.923379	0.881014	1.00289	1.04834	1.74543	1.76602	1.23612	0.497255	0.498711	1.05086
4575	Cer/NS(d18:1/23:0)	0.776933			NAJHAHQNQCNWOP-JMUUFCRMSA-N	634.612	590.86	0.0300839	0.175542	0.0868757	0.150681	0.140239	0.145042	0.157332	0.291188	0.277229	0.236079	0.417473	0.164991	0.260371	0.350302	0.199402	0.341778	0.139667	0.104499	0.208136	0.426128	0.215152	0.194024	0.205436	0.191545	0.142662	0.182991	0.124886	0.159758	0.248357	0.124045	0.224547	0.166799	0.160682	0.210029	0.176253	0.12907	0.25488	0.246003	0.325489	0.0703558	0.153936	0.184587
6697	GlcADG(18:1/18:3)	0.775877			DKOWROHKKUZZIA-MURDYDGNSA-N	791.541	421.017	0.200973	0.851207	0.696866	0.856801	0.677888	0.825151	0.908485	0.906701	1.01162	0.881191	0.867955	0.556062	0.761935	1.26186	0.865086	0.824109	0.587467	0.566413	0.709017	1.01415	0.791547	0.759585	0.627395	0.604157	0.639381	0.641314	0.604773	0.959039	0.964791	0.871137	0.402324	0.788807	1.02142	1.02457	1.05655	0.688354	1.02278	1.2299	0.821226	0.379913	0.677074	0.789225
10382	AcylGlcADG(20:3/22:6/22:6)	0.772652			AJQXSMZRIADMHD-DXFHDFCDSA-N	1175.78	440.091	0.723643	0.307013	0.435328	0.109342	0.429745	0.427844	0.33095	0.463718	0.360993	0.454243	0.354365	0.489659	0.584842	0.345607	0.323565	0.454964	0.0246682	0.499748	0.385862	0.336125	0.392111	0.290997	0.38355	0.371243	0.403509	0.347877	0.3956	0.343392	0.34671	0.636432	0.309034	0.38803	0.330468	0.414526	0.296918	0.313966	0.267188	0.344141	0.412422	0.588571	0.346566	0.376557
8475	PA(26:4/26:4)	0.771581			QRLRUWMHNGHJFL-CKKCRWTASA-N	911.649	542.656	0.366403	1.04548	0.952539	0.855945	1.17656	0.994364	1.31053	1.63023	1.55208	0.95881	1.31683	1.1447	1.10992	1.48138	1.17969	1.03637	0.99999	0.672051	1.46862	1.6394	1.14459	1.20351	1.05879	1.0516	0.782357	1.24558	0.996135	1.17346	1.51699	0.922305	1.01784	1.13141	1.4079	1.11181	1.37984	1.06459	1.33348	1.50797	1.399	0.83142	1.01887	1.15774
7984	PC(18:2/22:5)	0.769352			OUAMUEKHWHGDGC-JWZASGLLSA-N	876.576	407.058	0.398736	1.62285	1.36997	0.724613	0.96116	1.09544	1.53548	1.88375	2.48703	1.77595	2.49679	1.53455	1.56761	2.042	1.79433	1.70362	1.35223	1.17354	1.42055	1.71703	1.53286	1.88512	1.45795	1.78056	1.2308	1.38031	1.30722	1.74441	1.27938	1.39022	2.12286	1.49752	1.1892	3.10257	2.44018	1.52515	2.55113	2.28177	2.48584	0.867105	1.54021	1.75298
6659	PS(18:0/18:1)	0.763912			AJFWREUFUPEYII-ZZEZOPTASA-N	788.545	424.214	0.694588	8.53339	9.96983	6.45145	10.0724	7.15483	10.1467	11.6379	12.1243	10.0413	16.1821	8.02621	8.88322	12.5911	10.5654	10.0445	10.1317	2.32814	10.8963	13.4814	9.49784	14.7236	8.69003	11.2881	10.8707	10.4637	4.34113	5.31876	11.0887	11.3661	9.43262	8.69151	8.77399	13.1468	11.1621	8.95276	16.7769	12.7701	7.41587	6.04791	10.3642	10.0843
7678	SM(d14:0/28:2)	0.762295			BNOGWSLFXDUKEI-HLEFPVAISA-N	857.676	563.779	11.3508	32.0765	23.2111	29.9758	24.3201	25.0435	26.5369	34.1099	42.2415	27.2616	35.7664	21.3609	32.3571	35.7531	26.2262	32.5795	30.0946	23.0057	27.1069	41.6984	29.1038	35.0771	23.4917	35.8791	26.2295	27.5519	23.3783	27.6226	38.2541	24.2921	30.9552	24.7415	30.5966	46.519	30.3013	22.5334	39.852	38.9817	29.3227	14.0887	23.647	29.6658
6165	PE(18:0e/20:4)	0.762294			RXEVLILBESBJQS-ZKVKLVECSA-N	752.561	500.897	1.55336	5.5395	3.44986	5.28259	4.65767	4.89146	6.4457	5.55717	6.45353	5.64102	6.97523	4.14292	5.82906	8.53334	5.23778	5.41989	5.61872	4.77043	5.69902	7.64772	5.4673	8.71276	4.99313	6.01951	5.17979	5.47776	4.42349	6.28207	6.86618	6.43109	5.72744	4.9513	5.75861	6.91979	6.35294	5.03511	8.48409	10.4908	7.61531	3.38337	5.45234	6.22784
7701	PI(14:0/22:3)	0.760943			MNAWEWOEUPZGNZ-NKTIKPMXSA-N	859.556	273.052	0.0955457	0.370549	0.0210052	0.337325	0.22094	0.29255	0.0468393	0.307096	0.128385	0.0145189	0.248212	0.100875	0.210747	0.0966727	0.185259	0.241452	0.231896	0.153323	0.0315255	0.21824	0.177648	0.167544	0.208279	0.189246	0.068313	0.236817	0.168459	0.0332664	0.31924	0.0286219	0.0988042	0.0713085	0.120946	0.139115	0.150717	0.15495	0.0526859	0.0106221	0.121238	0.0909032	0.127091	0.127908
6727	PEtOH(19:0/22:4)	0.759471			ZWYCTXXGCSLBOA-PPXMHRCKSA-N	793.595	524.638	0.0307086	0.110334	0.0897555	0.0772264	0.0812843	0.140685	0.051731	0.0742382	0.125136	0.111557	0.134177	0.105428	0.0758686	0.113038	0.091787	0.0680335	0.123598	0.0795515	0.132143	0.10462	0.0960451	0.223103	0.0864253	0.100724	0.107697	0.113571	0.112972	0.0789233	0.129998	0.086799	0.117163	0.0830552	0.107088	0.116224	0.0737012	0.0898046	0.191938	0.165822	0.122839	0.076952	0.0805924	0.11327
7505	SM(d29:0/12:1)	0.758536			ISXHGXRVUKCMLR-NMSHJFGGSA-N	845.673	581.204	3.61216	15.7207	10.0513	13.8653	15.0492	13.4985	15.1774	18.6127	19.3551	16.9927	26.6136	11.2303	15.1042	19.7852	13.6482	15.8927	11.9939	9.17868	14.274	21.9594	15.0808	19.8835	14.811	19.4457	12.8706	12.4301	11.528	14.0496	21.9188	11.6573	18.0541	12.4557	12.3631	15.4916	16.4781	11.6231	19.6006	19.167	20.9089	7.36669	10.2302	15.1167
7216	PC(18:2/18:2)	0.757968			FVXDQWZBHIXIEJ-ZPPAUJSGSA-N	826.552	368.906	0.203033	0.558871	0.268963	0.396319	0.38024	0.375447	0.49724	0.436895	0.696493	0.314736	0.494461	0.241208	0.471605	0.53393	0.430999	0.559376	0.404257	0.435792	0.385649	0.550623	0.431807	0.566439	0.356464	0.481912	0.436228	0.456575	0.381836	0.499415	0.502946	0.453995	0.406864	0.513116	0.400139	0.622133	0.366243	0.426872	0.404059	0.419172	0.469518	0.304704	0.455019	0.446182
8071	SM(d14:2/30:2)	0.755646			UVPOGBCAJDSEJY-SFQHDKEFSA-N	881.675	524.048	0.138306	0.984079	0.550012	0.896052	0.629616	0.638456	0.904529	0.744265	0.662701	0.846318	1.15509	0.382508	0.655763	1.12787	0.828242	0.743044	0.807324	0.486303	0.858058	1.06843	0.755349	1.21973	0.637957	0.522955	0.711919	0.651964	0.807442	0.788038	0.978404	0.509955	0.804637	0.587915	0.852279	0.820094	1.10589	0.642878	1.52135	1.36083	0.91281	0.286358	0.73385	0.822863
5654	SM(d14:0/18:1)	0.755337			GNRVAWQEBGAYOB-MSUUIHNZSA-N	719.51	389.721	0.00448854	0.0396555	0.00239002	0.0426702	0.0350828	0.00303896	0.00204264	0.0628837	0.00781615	3.64446e-05	0.0570874	0.0116036	0.032296	0.00893242	0.053592	0.0195647	0.00824854	0.0102292	0.00183167	0.00636113	0.0204926	0.0409124	0.0134866	0.00739241	0.00629375	0.0479373	0.0185158	0.00423914	0.0405073	0.00215256	0.00681554	0.00363311	0.00316415	0.00275932	0.0107413	0.00587841	0.00860749	0.0040416	0.0122939	0.00464641	0.0168874	0.0130453
6657	PE(18:1/22:6)	0.753271			JZSZAGWWWKKXLO-HILQMKNTSA-N	788.523	405.121	2.69436	20.955	20.2598	8.41986	10.0055	12.7328	14.7392	20.3556	28.7453	22.0016	21.1637	14.685	15.1712	20.327	19.1627	19.3899	13.6967	9.76215	23.2603	21.9797	16.9754	20.2707	15.9649	20.4544	16.6703	13.2171	11.0031	20.0478	17.1437	10.681	24.1174	17.8215	8.40112	27.5521	22.2438	21.0214	21.8535	21.904	22.4991	6.1143	18.6448	17.8813
6291	SM(d15:1/20:0)	0.753232			KNSFZIGNZSGVAC-QOSDPKFLSA-N	761.579	427.27	0.793868	1.54764	1.17629	1.54561	1.5953	1.64958	1.21646	1.39464	1.87678	1.18292	1.46793	1.26473	1.18218	1.40208	1.23924	1.87984	1.34296	0.984834	1.2285	1.20645	1.35889	2.1725	1.18548	1.34473	1.25936	1.60921	1.53748	1.02952	1.38214	1.53752	1.22091	1.20262	1.17983	1.30854	1.44754	1.25256	2.00707	1.25053	1.50346	0.954024	0.93204	1.36585
5326	Cer/NDS(d18:0/24:0)	0.752968			BPLYVSYSBPLDOA-UHFFFAOYSA-N	696.651	617.749	0.875798	0.720455	0.523903	0.89143	0.894591	0.99928	0.780146	1.04969	1.41168	1.08363	1.29542	0.991749	1.34913	1.33877	1.0534	1.27601	1.29521	0.823083	0.973968	1.29548	1.04614	1.35928	0.96976	0.656075	0.871132	0.996694	0.662926	1.41155	1.03369	1.60153	1.82181	0.929877	0.791196	1.05836	0.835807	1.05782	1.09738	1.67111	1.08768	0.823801	0.93892	1.08382
5294	Cer/NDS(d18:0/24:1)	0.751625			ILKXKUIKEGBMBO-DQRAZIAOSA-N	694.625	573.951	0.978588	5.1916	3.44618	4.15014	3.28252	3.48543	3.78874	6.55786	7.36862	4.83568	6.7386	4.61905	5.28942	6.41541	6.66515	6.5741	4.11265	3.77411	5.2727	9.05736	5.0802	4.28677	3.87495	3.81542	3.51376	5.20133	3.19413	4.4143	4.52781	3.15382	5.28405	3.29094	2.34533	7.64621	4.36749	3.22417	5.25833	4.89573	4.61398	2.13318	5.00344	4.20226
4010	Cer/NDS(d18:0/16:0)	0.751243			GCGTXOVNNFGTPQ-UHFFFAOYSA-N	584.526	473.305	0.821029	1.37699	0.789104	1.35828	1.07651	1.31274	0.840507	1.23378	2.74789	1.3283	1.46752	1.5644	1.50692	1.29355	1.78359	1.67311	1.47895	1.3979	1.63079	1.48254	1.40822	2.10652	1.37278	0.706106	1.08303	1.86443	0.987417	1.7913	1.07854	1.48339	1.61896	1.39257	0.663154	1.45066	0.739732	1.13963	1.76623	1.52084	1.3625	1.24849	1.55946	1.34678
8301	GlcADG(22:3/22:3)	0.7494			SQRWAHREVPTHLJ-HUYIQXHZSA-N	899.647	590.32	0.502682	1.109	0.686484	1.20702	0.944624	4.43714	1.00073	0.956787	1.32019	1.05443	1.02247	0.767105	0.84799	1.17755	0.809046	0.853049	1.08175	0.826465	0.908424	1.05572	1.12843	1.17305	1.06542	1.11339	0.994976	1.12459	0.609827	0.987746	1.15319	0.933012	1.0227	0.967953	0.80205	4.04301	0.784599	1.18036	0.995081	6.1175	1.10083	0.808391	0.864019	1.39208
7649	GlcADG(20:0/20:0)	0.7494			MKUSVLOKHJAREQ-UHFFFAOYSA-N	855.661	513.884	6.92268	25.9821	21.6519	24.0983	17.7133	22.1299	21.3713	22.0593	23.9892	27.259	28.7974	13.3287	18.6607	26.6812	22.6395	21.5612	19.5239	16.5351	23.3296	29.6754	21.6955	24.3855	20.3236	18.4015	18.7911	20.5442	17.994	19.0067	27.074	17.9016	23.8369	20.3129	18.6248	27.2764	25.1332	16.2495	32.9	27.3998	20.8393	11.366	17.3845	21.2873
7360	GlcADG(20:5/20:5)	0.7494			VGYMJTSWKJKJCE-LPEZNXMBSA-N	835.578	505.64	0.00543493	0.0695821	0.0380854	0.0454437	0.0613601	0.0369378	0.064006	0.0307134	0.0226451	0.0513471	0.0631854	0.0329591	0.0393355	0.0672022	0.0735338	0.0416068	0.0509998	0.0624048	0.0574645	0.0599047	0.0487076	0.0729209	0.0524338	0.0850998	0.0528899	0.0330632	0.0444235	0.0741906	0.0831316	0.0438897	0.0581153	0.0359475	0.0569951	0.055017	0.0621082	0.0558214	0.0921501	0.0865598	0.0667823	0.0136887	0.0729017	0.0599065
7232	GlcADG(19:0/19:0)	0.7494			WZAHUXVJJRQEBJ-UHFFFAOYSA-N	827.629	464.576	0.42046	0.817923	0.76948	0.884494	0.873234	0.914199	0.88274	0.589597	0.800705	1.11602	0.964623	0.412034	0.486034	0.866404	0.682407	0.529015	0.621597	0.480052	0.614358	0.790279	0.725783	0.85291	0.792775	0.449967	0.71706	0.648724	0.750351	0.715589	0.818569	0.779893	0.662357	0.72666	0.557153	0.587117	0.629687	0.599873	0.932915	1.03934	0.667343	0.598594	0.534022	0.703045
4780	GlcADG(13:1/13:1)	0.7494			KGWISGJNGULRDE-XOHWUJONSA-N	655.422	358.758	0.0512645	0.129664	0.0994454	0.0655237	0.0939347	0.0937132	0.12149	0.0975414	0.127039	0.134894	0.133526	0.0919316	0.134582	0.136375	0.106101	0.098569	0.0293654	0.11326	0.104795	0.142643	0.105283	0.113377	0.135176	0.123496	0.0699867	0.114198	0.0702799	0.111758	0.121602	0.110252	0.123544	0.127469	0.107655	0.132737	0.097911	0.181876	0.13482	0.133039	0.106982	0.0971894	0.092792	0.115307
7671	PI(10:0/26:4)	0.749283			XBRXODRRBPUJTR-XWVIRPHISA-N	857.516	275.9	0.0431772	0.127194	0.131651	0.156437	0.00860364	0.263128	0.27801	0.0143479	0.102234	0.143808	0.106477	0.00103785	0.00633175	0.178375	0.0934273	0.144523	0.0839483	0.00505703	0.0987809	0.216414	0.110148	0.151018	0.0875416	0.0870649	0.17036	0.0338016	0.119857	0.285319	0.0139322	0.356045	0.150781	0.205961	0.178634	0.452937	0.270031	0.216783	0.817602	0.999396	0.0944651	0.0425291	0.0729122	0.240349
8663	HBMP(12:0/12:0/22:2)	0.74812			URAJYBQTGGGBQW-BLWADTQWSA-N	927.68	599.367	7.94124	26.4809	17.7224	20.753	21.8044	21.0635	22.9422	25.8415	25.736	28.0366	30.2109	15.213	24.1882	31.9947	23.0695	24.635	22.9048	18.7304	20.3088	32.7528	23.1165	25.4491	23.8477	25.3406	23.7646	21.4861	20.6109	26.928	31.8328	20.7724	26.6455	22.0438	21.7556	26.2443	28.126	21.431	28.1888	29.2662	28.5216	13.5185	20.4826	24.3128
8641	HBMP(12:0/12:0/22:3)	0.74812			FRGLDIJVBWJSRN-CRCXHREWSA-N	925.661	590.378	0.487665	1.35321	1.11437	1.03408	0.931125	0.951408	1.18052	1.21757	1.43379	0.979522	1.24475	0.927853	1.0751	1.08337	1.0424	1.06347	1.1186	1.02335	1.09027	1.39899	1.08757	1.10499	0.903389	1.04106	0.901445	0.971003	0.870351	0.869936	1.13133	0.995809	1.18971	0.926285	1.06953	2.14868	1.21528	0.855351	1.26192	1.20959	0.97866	0.772451	0.988743	1.07028
8270	HBMP(12:0/12:0/20:3)	0.74812			YZGXAVCDZPMMAS-XMRVQXCHSA-N	897.629	515.319	0.92055	3.21184	2.42358	2.16763	2.81997	2.43647	3.00517	3.82862	3.49579	2.5426	2.80088	2.25993	2.95857	3.4093	2.32358	2.47097	2.4942	2.02806	2.71592	3.74261	2.70281	3.05918	2.53219	2.99103	2.83838	2.23206	2.05375	2.62913	3.92174	2.69441	2.64723	2.35047	2.81427	3.63188	2.77167	2.66509	3.36131	3.58295	2.61631	2.00445	1.99653	2.7697
8617	HBMP(12:0/12:0/22:4)	0.74812			HMKRGNGWHZQTRN-LUJHFHPPSA-N	923.647	513.955	1.86206	6.2242	5.38179	5.44124	4.28109	5.06351	5.21987	5.03786	5.07822	5.93083	6.72462	3.43134	4.31083	5.60335	5.56642	4.80514	4.90903	4.03572	5.50066	6.61152	5.05097	5.24755	4.65871	4.43811	4.3855	4.52167	4.31878	4.30716	5.90963	4.35347	5.59413	4.88973	4.43963	5.58389	5.65371	4.13971	6.51007	5.722	4.54893	2.8003	4.27062	4.81466
7889	HBMP(12:0/12:0/18:2)	0.74812			DJVROOAUJLLPHX-BLWADTQWSA-N	871.613	508.287	1.26314	3.0717	2.06419	2.97017	2.45978	2.60312	2.23761	2.18463	3.57671	3.16599	2.35511	2.28802	1.63867	3.41808	2.0662	1.69403	2.65735	2.10417	2.0778	2.30596	2.41012	4.15714	2.76082	2.26898	3.34449	2.46279	2.68836	2.36488	2.83347	2.9502	1.98881	2.47501	2.54799	2.31208	2.37852	2.733	3.16685	3.9172	2.51921	2.51909	2.11769	2.72533
8508	HBMP(14:0/16:4/16:4)	0.74812			HFQUBHBWUWXMHP-QCEWYURLSA-N	915.597	398.525	0.216319	0.360189	0.187634	0.0763004	0.175223	0.164955	0.167484	0.123631	0.155748	0.143182	0.222254	0.18315	0.258204	0.157013	0.135075	0.147119	0.0294215	0.153146	0.147722	0.156288	0.168003	0.159488	0.181946	0.157639	0.121067	0.154947	0.165213	0.172256	0.167943	0.385865	0.16986	0.139979	0.141685	0.180089	0.171085	0.195249	0.172846	0.193134	0.139485	0.160185	0.132991	0.173148
6853	SM(d14:0/24:2)	0.748074			LSEKKYMYASEPKR-UDJAPEQQSA-N	801.629	494.219	0.0433306	0.047318	0.0344237	0.0823781	0.0348435	0.0563235	0.0517707	0.0539356	0.049455	0.0522976	0.0337988	0.0542064	0.0667933	0.0627307	0.0299577	0.0629998	0.0497816	0.0373306	0.0496729	0.0388453	0.0496097	0.0870314	0.0267599	0.0471886	0.0475488	0.0555571	0.0333114	0.0705281	0.0528446	0.0658777	0.0361879	0.032007	0.0329481	0.0186904	0.0238829	0.0451319	0.0521098	0.0644342	0.0618499	0.0610966	0.0453277	0.0480157
7467	HexCer/NS(d25:1/16:0)	0.748037			IHLDHNYHLGHDOJ-JMUUFCRMSA-N	842.672	549.554	0.164657	0.289766	0.236822	0.542135	0.292766	0.336805	0.325827	0.336053	0.276868	0.350006	0.332826	0.338841	0.519167	0.403737	0.209674	0.548668	0.239337	0.239608	0.301474	0.332023	0.330853	0.467661	0.23286	0.325279	0.202082	0.378647	0.236885	0.357486	0.375882	0.353341	0.32813	0.234416	0.235082	0.181147	0.253443	0.266881	0.400142	0.396691	0.427791	0.295873	0.252013	0.310087
7613	HexCer/NS(d18:1/24:2)	0.747937			BZGJJXJQWYTKIY-UZRIYOBRSA-N	852.654	500.249	0.146168	0.323263	0.296627	0.347863	0.215547	0.290078	0.317413	0.35992	0.22628	0.301331	0.382502	0.253154	0.333423	0.339244	0.244436	0.291154	0.290496	0.2293	0.322665	0.248529	0.28797	0.352816	0.211947	0.296798	0.193005	0.246187	0.214893	0.251447	0.274702	0.227389	0.274438	0.152396	0.188035	0.212414	0.229496	0.205269	0.327251	0.319554	0.276698	0.215626	0.288347	0.247935
5573	PE(16:0/18:2)	0.746404			HBZNVZIRJWODIB-BCTRXSSUSA-N	714.508	420.329	4.34396	14.2594	9.72422	15.5187	14.0749	14.4726	15.1644	12.3327	14.3175	17.2327	14.8717	7.42499	11.6412	18.9084	13.0453	17.5339	11.2466	9.11251	14.1948	20.0626	13.4742	17.317	13.3192	12.1792	12.8784	10.587	13.2191	13.3351	17.7791	5.73508	12.3855	14.4353	10.4318	14.4091	5.34573	11.5739	20.7669	25.1863	14.9582	7.66235	14.244	13.3874
6402	PG(16:0/20:4)	0.745525			OSLKKANICVMRGE-JAXHXWBXSA-N	769.521	331.584	0.00630241	0.017713	0.00305138	0.0142517	0.00884836	0.00505498	0.0022319	0.00947646	0.00566587	0.00281701	0.0242722	0.00172042	0.0121546	0.00573526	0.00899101	0.0233998	0.00437275	0.00444471	0.00413496	0.0146941	0.00896664	0.00818641	0.00833349	0.00781906	0.0058848	0.00783109	0.00987695	0.00209449	0.0129397	0.00167607	0.0015657	0.000963427	0.00223336	0.00110312	0.00627023	0.00720641	0.00405368	0.00150278	0.00812962	0.00507214	0.00970952	0.0056226
3377	LPE(22:6)	0.743019			XEVRBOQZSXWGQO-KUBAVDMBSA-N	524.286	50.8412	3.21361e-05	0.00418007	0.000711983	0.005124	0.000604009	0.0036391	0.00671346	0.000413754	0.0161815	0.0143933	0.00317964	0.00142821	0.00957212	0.00808698	0.0104922	0.00458065	0.00158053	0.00445798	0.00668251	0.0237297	0.00628919	0.00400275	0.00124789	0.000657617	0.000483856	0.00355701	0.00318245	0.00431296	0.0029396	0.00898188	0.0055992	0.00299112	0.000946294	0.0167667	0.000616236	0.00153341	0.00567519	0.00308857	0.00596788	0.000599477	0.00385686	0.00385035
6686	PE(18:1/22:5)	0.74152			IZEXFAOLFRVCJS-LKVUMQLBSA-N	790.585	464.432	0.0402593	0.0683771	0.0510118	0.0678656	0.0253246	0.0738793	0.0823497	0.035752	0.0256686	0.151478	0.086245	0.0170678	0.0252758	0.0222896	0.0425455	0.0684286	0.0358735	0.090492	0.0656495	0.0627076	0.056927	0.109997	0.0947213	0.0438165	0.0434654	0.0268867	0.0848377	0.0412536	0.0686435	0.0651188	0.0351356	0.0368106	0.0454161	0.0378266	0.0520116	0.0668991	0.132092	0.177246	0.0646749	0.0463909	0.0847482	0.0678996
4330	Cer/NDS(d18:0/18:0)	0.741436			KZTJQXAANJHSCE-UHFFFAOYSA-N	612.562	519.032	0.27632	0.37458	0.37852	0.378011	0.348609	0.537053	0.66653	0.685833	1.08852	0.326138	0.606742	0.309656	0.337873	0.585483	0.296077	0.364298	0.82776	0.303228	0.314419	0.371235	0.468844	0.946149	0.298324	0.644375	0.317613	0.4426	0.664211	0.552198	0.40127	0.722281	0.450735	0.331817	0.348518	0.375298	0.526388	0.343206	0.978953	0.72462	0.543161	0.266606	0.265241	0.507178
6608	PS(16:0/20:3)	0.740607			YOVVAUPTEBUBDZ-SVNQLWEDSA-N	784.513	355.311	0.264796	3.00784	1.96425	2.95021	1.72015	1.87083	2.98847	2.9869	4.20371	2.89659	2.97481	1.0908	3.35921	4.16429	2.7879	3.2181	2.90857	1.52117	2.89676	3.49692	2.66361	2.44582	2.77712	1.83573	3.63072	2.43678	2.6529	3.76361	3.7445	2.58149	2.64441	3.0789	2.50186	2.69368	3.05595	2.77811	4.04153	2.96379	2.97083	1.07891	1.94963	2.78131
6631	PS(18:0/18:2)	0.739885			AGTPCXBHIGMTEU-MLWYYCKJSA-N	786.528	389.837	2.64945	7.97364	3.28405	11.877	7.43536	4.43329	8.84491	3.88082	9.67017	11.9426	12.9703	1.64963	2.98671	8.34002	4.77792	5.8623	4.69391	5.26595	5.45747	9.46726	6.67314	10.2616	4.13564	8.15268	3.99826	3.75923	4.55314	5.51824	9.33145	8.0561	5.65301	8.52179	3.22408	6.78047	7.12641	4.17385	9.25128	8.33447	6.71457	2.25157	7.03447	6.34161
5883	SM(d15:0/18:1)	0.738155			YTRSUMJUCSCDTH-VLGSPTGOSA-N	733.551	372.198	1.23693	2.8442	2.04193	2.47993	2.19923	2.39172	2.23906	2.58695	2.71645	1.9082	2.82357	2.01263	2.84194	2.55536	2.15645	3.31342	2.33613	1.76674	2.39239	2.35163	2.35974	3.82015	2.09802	2.61139	2.04515	2.87046	2.31281	2.31189	2.29122	2.53437	2.24301	2.32943	2.36623	2.88614	2.71721	2.22112	3.73309	2.87473	2.409	1.72103	1.80654	2.51015
6080	SM(d14:1/20:0)	0.73258			MBBZUMZWXWUXOY-NHQGMKOOSA-N	747.564	398.53	44.7663	88.8865	72.0295	89.7392	72.0178	78.1725	78.0387	79.5301	91.5319	69.3839	97.5784	59.8728	67.8013	85.8697	72.3673	80.7759	74.7433	72.2519	73.0475	85.7811	76.7093	96.5492	69.0653	74.1122	71.1072	75.0819	74.0594	72.4673	86.9502	80.2609	78.4376	73.3053	58.7929	82.7344	79.5398	69.2893	96.7815	88.9906	77.0658	53.8321	71.2377	76.483
6459	SM(d14:0/22:2)	0.731826			ZASIQDDFYGMXJN-LJSPAGPLSA-N	773.58	409.587	0.672389	1.42781	1.07866	1.61327	1.32344	0.696255	1.50646	1.4093	1.67232	1.43541	1.53459	1.34929	1.26243	1.64502	1.20501	1.48291	1.623	1.02705	1.47503	1.53177	1.34857	1.66503	1.07492	1.36266	1.36319	1.15047	1.26911	1.28007	1.57049	1.59548	0.60132	1.13926	1.65541	1.39116	0.9689	1.472	2.17273	1.93436	1.58636	1.3538	1.04891	1.38278
6976	PE(20:4/22:6)	0.729978			LMWGIQYUPHCPHA-GGLIIMCGSA-N	810.506	354.642	0.137441	0.915256	1.12603	0.259969	0.557811	1.10518	1.11421	1.71869	2.14466	1.75058	1.77765	1.05289	1.24584	1.71874	1.38628	1.30253	1.49725	0.616391	1.38256	1.54549	1.21777	1.31137	1.4593	1.34615	1.3205	0.581825	1.03935	1.82332	1.42439	1.35128	1.77554	1.73219	1.18015	2.74913	1.77563	0.986365	2.35323	2.08538	1.63824	0.294791	1.14629	1.46872
7058	PE(20:1/22:6)	0.729761			XRZUHOFZIRSWMJ-LJHHLTENSA-N	816.553	449.327	0.304005	1.11506	0.548605	0.6486	1.4273	0.630309	0.355411	0.176329	0.241313	0.348085	0.524654	0.170798	0.956814	0.701349	0.208867	2.03823	0.156636	3.30267	0.44227	0.316803	0.730706	2.88913	0.389189	0.69504	0.200292	1.21191	1.37361	0.288367	0.17555	0.412971	0.239921	0.517249	0.303409	0.805285	0.492722	0.708192	1.42639	0.792307	0.970989	0.423537	0.155051	0.723556
6079	SM(d16:0/18:1)	0.721477			WDAUKOGYPMQBKW-VLGSPTGOSA-N	747.516	423.474	4.30023	18.2565	15.0061	10.0179	12.2415	18.9358	22.1841	15.9194	28.0492	20.2135	20.5819	18.4375	15.0029	24.7418	16.8158	16.8342	23.1744	15.5948	16.7015	19.9814	17.6495	25.6251	17.649	23.6265	19.0008	15.5958	16.1821	22.6196	24.6364	20.6815	23.302	23.0402	18.6426	20.3678	22.7674	18.8258	29.3312	21.6833	25.6777	10.4802	21.2475	21.0491
7313	GlcADG(19:0/20:4)	0.719505			YWJVWFFRGHPJDM-GAVJZRLKSA-N	833.6	478.599	0.720481	1.40825	1.00911	1.44174	1.30281	1.36964	1.17754	1.06786	1.21851	1.4393	1.86851	0.939716	0.993735	1.61746	1.18484	1.45015	1.25981	1.13722	1.30692	1.41163	1.26626	2.06997	1.04744	1.14713	1.11325	1.28555	1.52385	1.18947	1.71674	1.35144	1.21993	1.2062	1.01482	1.16859	1.094	1.38809	0.925585	1.84943	1.7965	1.02338	1.3452	1.32383
7235	SM(d14:1/26:2)	0.717878			SMBPKQUUEZEXGP-NHCDRURDSA-N	827.644	500.421	0.0328616	0.0480144	0.040701	0.0303158	0.026905	0.0564904	0.0413996	0.121052	0.0707215	0.0526199	0.0550298	0.094942	0.0879904	0.0483195	0.0307387	0.0495207	0.0753555	0.0319694	0.0638544	0.0578878	0.0558344	0.0856806	0.0476424	0.0885725	0.0259617	0.0469264	0.021286	0.0573911	0.0575146	0.0495487	0.063266	0.0265235	0.0483342	0.0598934	0.0434392	0.0506862	0.0563158	0.0723068	0.0737602	0.0638352	0.0537316	0.0546308
4638	Cer/NDS(d18:0/20:0)	0.717668			ZWAUSWHRQBSECP-UHFFFAOYSA-N	640.544	533.025	0.013406	0.0264874	0.0256745	0.0357249	0.0193769	0.0201943	0.0232133	0.0292149	0.0404868	0.0248239	0.0482144	0.0290515	0.0364156	0.0282091	0.0438122	0.048391	0.0231934	0.0235158	0.0214338	0.0320067	0.0296423	0.0391334	0.0177958	0.0117677	0.0176296	0.0281804	0.0185719	0.0201654	0.029534	0.0273464	0.0279711	0.0146389	0.0132776	0.0429321	0.0271753	0.0318231	0.0189859	0.0260321	0.0318318	0.018501	0.0175794	0.0240436
6113	SM(d14:0/20:0)	0.716341			BLHKKGMGTNRNHM-UHFFFAOYSA-N	749.57	398.526	4.96671	9.91053	8.15904	9.93377	7.95418	8.77466	8.68896	8.8067	10.1902	7.81265	10.7618	6.73554	7.43743	9.56706	8.07698	8.99704	8.2729	7.98555	8.29496	9.66897	8.54978	10.6741	7.55816	8.28556	7.98925	8.29609	8.35129	7.98696	9.66884	8.8333	8.93218	8.00661	6.61924	9.07655	8.75462	7.83161	10.6888	9.89008	8.56666	5.91976	7.94205	8.49358
7259	SM(d14:0/26:2)	0.716161			NMEAJICTOSBCPZ-HLEFPVAISA-N	829.643	514.929	4.36468	13.0237	10.5656	10.891	12.2628	11.7329	12.6889	14.3777	16.1812	11.6651	13.9493	10.1668	10.8599	13.8343	9.32148	11.1	10.8337	8.54012	11.9574	16.6351	11.7476	14.1093	10.4568	13.6391	12.2179	10.8465	9.02642	11.0549	16.7098	12.359	11.8975	10.7614	12.7174	15.5223	11.5612	11.8207	15.5172	14.7094	12.2947	7.67561	8.89345	12.1895
7290	SM(d28:0/12:1)	0.715006			VHOIZKOWDLVTML-MEIHLTSWSA-N	831.677	723.121	2.16154	1.30647	2.92491	0.829519	0.966836	2.32264	1.1489	2.61585	1.38474	0.810424	1.09842	0.838649	0.842372	1.09152	1.31382	1.29027	1.26407	1.33101	1.35356	2.29072	1.45931	1.25374	1.41676	1.21216	1.15801	0.941406	1.27459	1.0368	1.2706	0.811908	0.939571	1.06585	2.8754	0.964747	2.2461	0.962806	1.12868	0.988625	0.926908	0.748699	0.957429	1.20904
6952	PS(18:1/20:4)	0.712903			YEPDLFVZBAYNRO-HAGCXRLMSA-N	808.505	295.998	0.019925	0.0588592	0.0276519	0.0600745	0.0222051	0.0283446	0.00380119	0.0374442	0.0692125	0.0290569	0.0495609	0.0220817	0.0387633	0.0570478	0.0366456	0.0872779	0.0359139	0.0290405	0.0400829	0.0872519	0.0420121	0.0545458	0.0300976	0.0365636	0.0483702	0.0567869	0.0283815	0.0560134	0.0460961	0.0471857	0.0443815	0.0487256	0.0295961	0.103119	0.04623	0.0418802	0.0707968	0.0654817	0.0350642	0.029071	0.0245614	0.0471474
8334	PC(20:3/22:5)	0.711666			JCZOXJJXTZMLHT-KBNKHNLLSA-N	902.514	459.005	0.946788	0.709993	0.596302	0.477814	0.809803	0.700466	0.585283	0.542444	0.669107	0.667878	0.54152	0.657497	0.562354	0.420056	0.662173	0.484749	0.662913	0.694263	0.602889	0.482217	0.623825	0.440156	0.699787	0.427704	0.599981	0.516338	0.70684	0.450144	0.509346	0.664615	0.406555	0.611406	0.688207	0.458344	0.497783	0.559658	0.491271	0.51664	0.502393	0.707541	0.576689	0.55157
6488	SM(d18:0/18:1)	0.711397			HHAUPBIWIXBMEU-VLGSPTGOSA-N	775.546	469.95	3.34701	11.6522	9.5482	7.29794	7.21769	14.4886	14.3242	11.1496	21.5085	15.1378	16.0723	13.6969	5.20554	16.7785	10.9349	16.8857	15.3415	9.67236	12.9292	16.6331	12.4911	20.2742	12.4169	16.574	10.2139	10.568	11.6776	12.3515	14.7495	13.3707	15.0132	16.0856	11.7273	18.2352	13.3118	12.841	19.0085	14.6141	19.3118	8.67162	11.2552	14.1136
6754	PI(15:0/16:0)	0.710217			JALDXLTZFMFDKA-UHFFFAOYSA-N	795.515	306.697	0.0231997	0.120869	0.114688	0.116168	0.108878	0.0799956	0.139873	0.135741	0.224571	0.148491	0.12823	0.148159	0.155865	0.332762	0.132765	0.123433	0.148075	0.0980207	0.123308	0.252658	0.142787	0.117412	0.124998	0.11428	0.109999	0.156782	0.0819574	0.198539	0.123782	0.141706	0.130462	0.122839	0.138286	0.170517	0.143635	0.0757132	0.171923	0.309645	0.268875	0.0780956	0.258601	0.151902
7263	PC(18:1/18:1)	0.709846			SNKAWJBJQDLSFF-YEUCEMRASA-N	830.582	439.388	1.25659	7.62416	2.5409	4.08449	4.50952	4.8234	6.31743	5.39533	6.7836	6.52855	4.1785	4.47996	7.22766	6.98096	6.18839	4.6483	4.46641	5.33161	5.9243	7.37182	5.33309	8.47201	6.10908	5.55745	7.39444	6.70231	4.32204	5.66	7.99313	6.30127	5.77824	6.40665	5.5042	6.76007	6.94066	6.82825	5.54255	9.57954	7.78667	4.52537	7.43475	6.57993
7626	SM(d14:2/28:2)	0.708241			APVVIKGWDUMMAY-VIVRHXLSSA-N	853.661	500.305	0.0816826	0.188645	0.138702	0.198703	0.110086	0.173356	0.165236	0.223206	0.133632	0.189668	0.254641	0.161823	0.197545	0.158297	0.156203	0.19114	0.205135	0.152774	0.185358	0.11732	0.169158	0.182361	0.14493	0.179674	0.0772016	0.161002	0.160462	0.127382	0.174386	0.168689	0.185717	0.0710545	0.144291	0.125226	0.12624	0.138611	0.159905	0.21408	0.196932	0.134316	0.178719	0.152559
6348	PEtOH(19:1/20:3)	0.697536			DXNFENLVHYZXRD-FZVMUUCISA-N	765.569	453.734	0.0182395	0.0330263	0.0187299	0.0442988	0.0240618	0.0481292	0.0341766	0.0182506	0.0452734	0.0392768	0.02076	0.014822	0.00558844	0.0394	0.0286145	0.021032	0.0333126	0.0163178	0.0319251	0.0250073	0.0280121	0.0452064	0.0299759	0.0212059	0.0435071	0.0335147	0.0519382	0.0195828	0.0391503	0.0385501	0.0198101	0.0273234	0.0223482	0.0167923	0.0158216	0.0220532	0.0586993	0.0379914	0.0278209	0.0258492	0.0161401	0.0306641
4964	Cer/NDS(d18:0/22:0)	0.695908			SXPRAKSDHOEHIG-UHFFFAOYSA-N	668.619	587.485	0.711157	0.532549	0.369021	0.61204	0.611511	0.700843	0.523137	0.693394	1.35879	0.936166	1.06558	0.70302	0.846324	0.95493	0.788647	0.924705	0.792089	0.611236	0.745221	0.880915	0.768064	1.17777	0.767827	0.569546	0.628054	0.767502	0.452015	1.01839	0.64023	1.37602	1.22436	0.688279	0.449667	0.763078	0.526506	0.674662	0.925901	1.21096	0.801217	0.520164	0.683001	0.793258
7892	PMeOH(26:1/22:6)	0.695573			LWDPBYLDSADXMI-YCGHCXDISA-N	871.661	531.057	0.0577625	0.0527575	0.0901956	0.108203	0.0235489	0.0333078	0.0676284	0.0981941	0.0377145	0.0569341	0.103207	0.0485561	0.110532	0.0367893	0.0790485	0.100709	0.0356579	0.0760704	0.0806519	0.0545784	0.0676023	0.0462464	0.0449595	0.0497542	3.68202e-05	0.0557231	0.034432	0.0497706	0.0343708	0.0313364	0.0825965	0.0152768	0.536829	0.0456725	0.0495382	0.0874384	0.0461845	0.231222	0.0336366	0.0326018	0.087123	0.0797375
7403	PS(18:0/22:4)	0.69299			LJUFXCVFKSJRPV-PYQGTGCGSA-N	838.552	383.379	0.0380984	0.25629	0.0710941	0.340455	0.157503	0.297999	0.324721	0.153171	0.403324	0.213971	0.216391	0.113411	0.119856	0.519101	0.322511	0.206931	0.478253	0.115307	0.0587155	0.202412	0.230476	0.180182	0.182589	0.309065	0.119735	0.172022	0.154039	0.3899	0.205154	0.577117	0.416485	0.26027	0.444131	0.604488	0.0803213	0.183707	0.887691	0.698669	0.269198	0.0983291	0.161479	0.319729
5078	Cer/NS(d18:2/23:0)	0.684031			YVMFSKMDQVDKIS-QCVIXQMPSA-N	678.603	562.69	0.736592	4.14695	2.42673	3.03554	2.84874	2.76443	2.70554	3.33831	5.9754	2.12168	3.11201	4.01743	4.8003	5.75502	4.1772	6.15076	2.97338	2.3042	4.65204	7.99665	3.80194	3.86993	3.03117	3.26642	1.60134	2.2564	1.35567	2.7653	3.4948	2.66778	3.38222	1.65291	3.13597	5.40072	1.81565	2.22017	4.47914	3.57965	4.3396	1.76725	3.72286	2.99025
6068	PE(16:1e/22:6)	0.682531			KGCPGAKRLOCUEV-ZLXBYIIJSA-N	746.552	466.072	0.0238702	0.0595684	0.0678847	0.120326	0.0443613	0.0619045	0.0789262	0.0583045	0.0664253	0.0742017	0.112052	0.0578487	0.0760213	0.0847539	0.0608435	0.0225716	0.0814965	0.0561516	0.0657603	0.100812	0.0687042	0.0611772	0.0483517	1.15673	0.0695894	0.0495028	0.110756	0.0774612	0.082622	0.0591897	0.0751303	0.0578326	0.0491409	0.0635581	0.0363213	0.0421845	0.0587352	0.135022	0.918828	0.0256732	0.0889342	0.163337
5711	PEtOH(16:0/20:4)	0.682026			QTIJJMLOUMWMQQ-BUPHOURSSA-N	723.497	350.233	0.0237248	0.158315	0.173441	0.191814	0.0770559	0.0321989	0.431617	0.162526	0.263317	0.0422617	0.0343858	0.0890213	0.0712861	0.0363992	0.114227	0.0934331	0.0422752	0.0306044	0.0307256	0.107569	0.11031	0.225556	0.161655	0.251558	0.208435	0.934218	0.198419	0.101866	0.14685	0.0311087	0.100583	0.147759	0.133598	0.192098	0.378758	0.189668	0.166966	0.0116989	0.0840033	0.0610536	0.023362	0.187461
3500	Cer/NS(d18:2/16:0)	0.678467			GMWIWVUTMCBDSP-ZNPGVSGMSA-N	534.488	414.566	0.045711	0.144275	0.0676209	0.0781855	0.101531	0.0962552	0.107886	0.199388	0.154106	0.123192	0.195597	0.182498	0.147698	0.146429	0.182937	0.191484	0.13446	0.151484	0.16584	0.190096	0.140334	0.139849	0.0967563	0.0883544	0.149919	0.167512	0.136644	0.107252	0.106517	0.132299	0.110978	0.107321	0.123075	0.141178	0.0901348	0.10476	0.166508	0.112887	0.139221	0.124555	0.182953	0.126434
6443	PE(18:2e/22:6)	0.67693			VVEHXBSUSFPSAC-OJMLKDQNSA-N	772.528	428.379	1.98318	6.07142	6.01984	3.841	3.39045	5.5751	7.36715	5.97566	10.3261	8.58517	7.47752	5.14465	5.30733	8.00857	5.8045	6.37116	6.08095	2.08764	6.81123	8.60609	6.04173	8.35515	5.88207	6.75572	4.72687	5.21945	5.27342	6.14272	5.01793	6.78	8.27024	7.82402	5.1588	8.09892	8.06496	5.08553	10.3904	7.35856	8.60139	3.6366	6.23072	6.64367
4663	Cer/NS(d18:1/24:2)	0.673928			VMOXUICDIMVPPG-UZRIYOBRSA-N	644.596	545.772	0.0677409	0.475896	0.345685	0.41235	0.256574	0.396873	0.294526	0.556066	0.678787	0.555212	0.610236	0.329022	0.426166	0.707795	0.543655	0.527742	0.333237	0.287474	0.507495	0.803936	0.455823	0.457847	0.388389	0.306349	0.28935	0.446312	0.266322	0.298596	0.378535	0.284676	0.454086	0.310096	0.219081	0.766583	0.354217	0.237039	0.574352	0.512727	0.386897	0.172888	0.37831	0.374133
6978	PS(18:1/20:3)	0.669839			VYKUHSAPTTXFOP-ZYKQNZMBSA-N	810.53	390.988	0.809741	1.40662	1.6783	2.15083	1.4705	2.10578	2.16254	2.00825	3.1667	2.36113	2.32087	1.32697	1.55573	2.56919	2.01047	1.75434	2.17357	1.96678	2.2996	2.43948	1.98687	2.39901	1.71092	2.27196	1.66493	1.71017	1.39461	2.19724	2.50706	2.68914	2.32738	1.88696	1.88605	2.43763	1.66391	1.59331	3.21198	2.74544	2.08528	1.42812	1.80639	2.08088
4148	Cer/NS(d18:1/17:0)	0.667303			ICWGMOFDULMCFL-SJCQXOIGSA-N	596.526	478.658	0.408123	1.05877	0.458804	0.715255	0.717441	1.25355	0.559006	1.18868	1.59719	0.834201	1.14452	1.04412	0.911488	1.20279	1.15435	2.09452	0.932448	0.644998	1.01921	1.13234	1.00359	1.4184	0.948479	0.738687	0.677495	1.28401	1.20106	0.615734	0.732226	0.793236	0.801611	0.788414	0.685293	0.941297	0.651147	0.617502	1.61623	0.717785	1.1369	0.556727	1.16688	0.904455
4618	Cer/NS(d18:1/20:0)	0.66671			XWBWIAOWSABHFI-QOSDPKFLSA-N	638.537	503.693	0.0147632	0.0369273	0.0193359	0.0486148	0.0356428	0.038678	0.0498566	0.0234563	0.0214727	0.0491226	0.0388704	0.023998	0.0227003	0.0588331	0.0494376	0.0609936	0.0186837	0.0259376	0.0354723	0.0520207	0.0362409	0.0562204	0.01931	0.0271375	0.029532	0.0297056	0.0386435	0.0357699	0.0543929	0.027911	0.0477891	0.0226204	0.21539	0.0231029	0.0391751	0.0395186	0.0275773	0.0862071	0.0363876	0.0790158	0.016692	0.0476049
6523	PC(16:0/16:0)	0.662974			KILNVBDSWZSGLL-UHFFFAOYSA-N	778.561	459.74	34.4283	107.658	89.0526	97.6354	83.4842	80.0668	106.305	111.517	96.9604	81.0204	114.897	96.9048	108.8	117.475	103.345	103.36	99.0851	88.4471	94.5133	114.83	96.4893	114.34	92.8699	111.941	96.8006	86.4312	81.2133	108.094	125.366	89.9018	122.347	94.5244	95.6477	120.519	107.831	88.1121	109.656	117.978	103.05	68.4892	109.9	102.251
7330	PC(16:1e/22:6)	0.661841			LSUUYCOJTDXYNX-AQISBKEKSA-N	834.565	425.581	0.16181	0.515813	0.451822	0.140623	0.247476	0.306821	0.653329	0.548692	1.06665	0.565026	0.66695	0.716619	0.457592	0.625836	0.494957	0.376714	0.508861	0.468459	0.489741	0.433174	0.494848	0.699899	0.410083	0.720282	0.396837	0.386055	0.378203	0.517853	0.491437	0.419279	0.719734	0.533755	0.432706	0.770549	0.870543	0.417828	0.832647	0.486859	0.954605	0.322583	0.564626	0.566318
6975	PS(18:0/20:4)	0.661339			IULWELDCBXQXED-ZKVKLVECSA-N	810.52	337.234	0.0710969	0.426919	0.299544	0.61912	0.231256	0.330665	0.467331	0.363673	0.582913	0.401427	0.369493	0.200461	0.177235	0.368267	0.350047	0.415626	0.30334	0.176873	0.297087	0.573655	0.351301	0.401968	0.224009	0.552401	0.313664	0.283251	0.252816	0.474135	0.475669	0.359609	0.398397	0.373807	0.298375	0.810165	0.183322	0.342092	0.567706	0.670157	0.297951	0.134506	0.316755	0.386538
5218	Cer/NS(d18:2/24:2)	0.660428			QMPJMPWWIPZEKC-AREXDUQASA-N	688.587	514.346	2.82128	4.26628	5.3461	3.56295	3.25682	3.63199	3.07044	4.55424	4.28997	4.22971	5.38263	3.39774	3.98312	6.54643	5.34902	4.6006	3.81644	2.92616	5.15132	6.89768	4.35405	4.03284	3.46212	2.80229	3.3649	3.74185	3.05761	3.30128	4.08464	3.197	3.83826	3.06812	3.49115	4.05468	3.55726	2.88911	5.82195	5.09323	4.4757	2.31637	4.05485	3.68526
7341	OxPC(16:0/18:2+2O)	0.657821			GMJLRVXYZZADNS-CRWFHCLESA-N	834.514	154.91	0.00736419	0.0421451	0.0140466	0.0450593	0.0402156	0.0270654	0.00516886	0.0528105	0.047003	0.00587764	0.0536543	0.0158417	0.030547	0.0328167	0.00204847	0.00274299	0.0340976	0.0400413	0.00896392	0.0526593	0.0280085	0.0316171	0.0315597	0.00137563	0.0235777	0.00309269	0.0305902	0.0180889	0.141322	0.00583083	0.0708692	0.0223908	0.024956	0.03209	0.00310794	0.0301891	0.0220684	0.00321309	0.00264616	0.00130727	0.0273071	0.02636
3351	LPS(18:1)	0.655355			JZWNYZVVZXZRRH-KTKRTIGZSA-N	522.32	105.33	0.00511716	0.0285923	0.00335313	0.013834	0.0270263	0.00988203	0.0200981	0.025588	0.00815323	0.00419625	0.0260907	0.00951949	0.00914191	0.0170826	0.0205886	0.0146789	0.0154124	0.018309	0.00336466	0.016309	0.0148169	0.0210581	0.0174783	0.013536	0.0109832	0.024256	0.0251162	0.00312565	0.0251418	0.00419677	0.00946797	0.0118776	0.00898781	0.0087378	0.00223575	0.0157079	0.00797381	0.00319224	0.0201189	0.00907665	0.0245727	0.0133421
4595	Cer/NS(d18:2/20:0)	0.653779			NBSDZPNNDCXPFZ-CZIXKSQASA-N	636.484	526.491	0.000765031	0.00224422	0.00553075	3.49729e-05	0.00299847	0.00562972	0.0192027	0.00315321	0.00408322	0.00911427	0.00589316	0.0105363	0.0011738	0.00241615	0.00644638	0.00824352	0.00371048	0.00735534	0.00938378	0.0128299	0.00603726	0.00163041	0.0071661	0.00503313	0.00386067	0.00634735	0.00800427	0.00441736	0.0047089	0.00981722	0.00938788	0.00726756	0.00411021	0.0190872	0.00508287	0.00748312	0.0156199	0.0111123	0.00559998	0.0045426	0.00848693	0.0074383
5659	PE(16:1e/20:5)	0.652367			YMKZESHNWGNAIE-VNTVABMMSA-N	720.496	403.657	0.237244	0.628397	0.339374	0.334264	0.498988	0.387803	0.533437	0.337095	0.925042	0.412459	0.493965	0.875677	0.344892	0.90363	0.514088	0.685555	0.380224	0.4587	0.428061	0.505449	0.511217	1.09308	0.418514	0.715203	0.460454	0.679331	0.602699	0.824502	0.693102	0.655324	0.474076	0.833604	0.438684	0.579935	0.64758	0.662105	0.804108	1.11851	0.740947	0.32196	0.954735	0.685923
6764	PE(18:0/22:3)	0.651508			FWFYKTALQSTAHK-WDTHWMLCSA-N	796.575	490.253	0.289481	0.86095	1.05599	0.960162	0.61308	1.02275	1.14269	1.10731	0.954669	0.974915	1.23201	0.671593	0.92703	1.4217	0.958431	0.727234	1.05839	0.840214	1.0547	1.08742	0.948036	0.978006	0.55801	0.94186	0.660949	1.01811	0.600842	0.976526	1.03638	1.19434	1.30275	0.839993	0.976145	1.14471	1.21113	0.707858	1.14703	1.22026	1.0097	0.527245	0.643998	0.934793
6273	HexCer/NS(d15:3/24:2)	0.651214			STZUKBFNJFWGKS-OWULHGJFSA-N	760.558	388.83	0.313699	0.448222	0.688385	0.63264	0.325009	0.435159	0.431598	0.785724	0.370662	0.42142	0.467902	0.396017	0.615635	0.592987	0.411149	0.490228	0.447913	0.374792	0.493134	0.406602	0.477444	0.543468	0.300923	0.643519	0.304847	0.843244	0.286216	0.49938	0.453262	0.447514	0.4609	0.337893	0.350431	0.360619	0.388122	0.367231	0.395199	0.479719	0.531498	0.444765	0.366871	0.440281
6929	PI(16:0/16:1)	0.643396			QAWXBJDYTIBLRK-PEZBUJJGSA-N	807.491	436.313	0.311222	0.581796	0.72693	0.569618	0.584872	0.672344	0.634905	0.639139	0.60672	0.61182	0.587013	0.724484	0.467981	0.415128	0.582677	0.510845	0.709783	0.677696	0.669302	0.490609	0.588744	0.412917	0.596389	0.551924	0.515323	0.516577	0.625834	0.432946	0.570381	0.605535	0.624122	0.493173	0.599728	0.5559	0.448812	0.546352	0.4579	0.414258	0.478786	0.576985	0.57308	0.529846
6496	HexCer/NS(d22:2/18:2)	0.641494			WKCMDPFDNXPSBH-CZDGAUOHSA-N	776.597	454.673	3.08634	4.54926	3.26491	5.6749	4.46215	5.03071	4.07046	3.49285	7.21783	5.34867	4.26165	3.70783	2.81922	5.72069	3.13646	3.33947	4.80248	3.5316	3.893	3.98573	4.26981	7.48034	4.79682	3.63334	4.81805	4.07422	4.92426	4.11966	4.77872	5.01804	3.24388	4.20983	3.72388	3.80607	3.2222	4.74209	7.44932	6.05102	4.79934	4.78163	3.34357	4.65081
6131	PC(15:0/15:0)	0.640219			LJARBVLDSOWRJT-UHFFFAOYSA-N	750.533	440.646	1.38282	4.21469	3.9099	3.84315	3.17016	3.58856	5.221	3.73916	5.90779	4.41119	4.36903	3.94588	3.34082	4.94067	3.99832	3.6295	3.02053	3.69496	4.29401	5.8066	4.02144	5.38153	3.31079	3.88447	3.38189	4.19643	3.19798	4.80257	3.44833	4.6319	4.85036	4.13601	3.92462	5.69118	4.67029	3.0747	5.66844	5.12607	4.21646	2.24089	6.89108	4.3363
7908	OxPC(16:0/20:5+3O)	0.632225			JCBBPKSECDQNGE-PDMXZTDESA-N	872.537	327.056	0.0573582	0.420784	0.314571	0.262533	0.334333	0.545174	0.370919	0.371306	0.757993	0.434336	0.354607	0.292961	0.193888	0.511829	0.318802	0.564573	0.253253	0.181719	0.366205	0.459492	0.368332	0.518222	0.287244	0.60836	0.275443	0.439349	0.308191	0.460459	0.368139	0.410788	0.443677	0.572197	0.369592	0.665614	0.495185	0.325899	0.759076	0.552501	0.351432	0.137866	0.344985	0.434711
6583	PS(16:0/20:4)	0.627421			FNOBGXQUVKEMEE-JAXHXWBXSA-N	782.496	330.482	0.471489	2.44931	3.00824	3.38914	2.28287	2.85211	2.45418	2.40947	4.89118	3.74774	2.4893	2.03389	1.44358	3.38809	2.75265	2.60845	2.19834	1.68306	2.44604	4.03967	2.65194	3.37006	2.90662	3.80509	1.86546	1.67676	1.64421	3.81579	4.62542	2.55287	4.36922	3.61896	2.68846	4.53107	1.93237	1.48343	3.95641	3.90305	1.50089	1.80271	2.33918	2.9194
7261	PS(20:4/20:4)	0.62126			PIDWUQSPJUEUOW-CKKCRWTASA-N	830.494	399.607	0.194342	0.631746	0.584697	0.505833	0.587825	0.653849	0.629518	0.698797	1.13951	0.890204	0.670408	0.732297	0.622437	0.891553	0.637869	0.672897	0.736625	0.50752	0.629703	0.843775	0.67307	0.608326	0.66829	0.845145	0.688559	0.529971	0.636539	0.659551	1.46497	0.656998	0.763632	0.81819	0.526618	0.827015	0.656197	0.803297	0.779926	0.981881	0.901445	0.465325	0.686698	0.748429
7370	PS(18:0/22:5)	0.619058			PZEFRSYCROBXSJ-NIZIMQIGSA-N	836.542	391.199	0.0894787	2.1545	0.53243	1.01567	0.481493	0.56555	1.11554	0.748106	1.00504	1.21808	1.28298	0.358839	1.91051	3.9317	0.796916	0.598209	0.990408	0.588564	1.1627	1.21428	1.08805	1.474	0.443753	0.803889	0.678555	1.47608	1.81615	1.1306	0.95107	0.888025	1.29566	1.72748	1.74791	1.06577	1.29715	2.16199	2.27754	1.52987	3.79269	0.292213	2.05101	1.44507
7870	PC(20:5/20:5)	0.610921			WAIHGVAZVKEQGR-IYICPNJGSA-N	870.546	451.494	0.516857	0.550487	0.459757	0.616477	0.711516	0.561062	0.529465	0.553692	0.500691	0.587379	0.559822	0.516673	0.527755	0.441992	0.459525	0.885075	0.647835	0.460647	0.628704	0.571181	0.56433	0.598512	0.5754	0.533498	0.542861	0.482216	0.571979	0.428476	0.537035	0.519547	0.507745	0.443428	0.436727	0.436842	0.420687	0.58411	0.437352	0.161817	0.501345	0.595855	0.590881	0.495316
6099	PE(16:0e/22:6)	0.610829			JJMPYAHUHHQAJB-YKPVOZFUSA-N	748.519	423.159	1.08808	5.26518	4.38899	3.12377	3.79498	5.45627	6.76695	5.02174	8.41941	6.0066	6.55713	5.30202	4.53222	7.45901	5.11838	5.199	6.8605	4.70453	5.17015	6.08997	5.31624	7.6985	5.21109	7.21005	5.53837	4.90235	4.86634	7.00941	7.36687	6.32644	6.93942	7.14601	5.63761	6.42339	7.10969	5.59956	9.13502	7.01872	8.09121	3.21641	6.38339	6.44149
7285	GlcADG(19:1/20:4)	0.6057			MSIFYBVWDUXPHO-KQVRDVJSSA-N	831.556	495.928	0.466171	0.356737	0.250024	0.759139	2.26668	0.80142	0.813718	0.665069	0.519271	0.829443	1.18352	1.0808	0.219473	0.965065	0.748028	3.52409	0.499759	0.757718	0.239746	0.693513	0.88197	0.991554	0.602519	0.250966	0.238981	2.92834	3.13393	0.439919	4.43149	2.91293	0.850615	0.700579	0.558139	0.477058	0.37319	2.3078	1.00132	1.11347	0.981851	0.525831	0.662292	1.27414
6577	PS(18:2/18:2)	0.600339			ZTNFQEXYTMNFHG-MAZCIEHSSA-N	782.495	420.362	0.387733	0.932163	0.605896	0.817129	0.874213	0.777899	0.799188	0.714311	0.675431	0.87696	0.780046	0.50367	0.734793	0.867521	0.761627	0.842909	0.652513	0.60221	0.787883	0.978937	0.748652	0.772024	0.794212	0.636601	0.761791	0.604378	0.795719	0.667699	0.915042	0.610974	0.621691	0.738609	0.669053	0.68446	0.644828	0.666844	0.814784	1.0414	0.781781	0.514382	0.835067	0.728567
5699	Cer/NDS(d21:0/23:1)	0.593328			ADWSZHXVRPDEBZ-FCQUAONHSA-N	722.665	633.03	0.338564	1.14533	0.492739	1.25622	1.19504	1.3828	1.00802	1.06043	1.26926	1.37326	1.32291	0.981203	1.24674	1.85163	1.45018	1.72704	1.7166	0.878652	0.843816	1.80052	1.21705	1.61507	1.45925	0.764105	1.17624	1.37006	1.43779	1.75156	1.53276	1.03286	1.35483	1.25373	1.05127	1.14319	1.099	1.29881	1.62934	2.03009	1.14135	0.691484	1.15255	1.29927
5609	Cer/NS(d18:2/26:2)	0.589354			ZWIWPQWBBSUQRL-XVVWIREQSA-N	716.632	564.116	0.012315	0.111357	0.0730583	0.0570086	0.0699413	0.0621415	0.059558	0.14799	0.145385	0.0941724	0.144713	0.105296	0.122244	0.164783	0.104518	0.189104	0.0627371	0.051483	0.147291	0.208919	0.106701	0.0878795	0.0739832	0.0872132	0.0649121	0.0825789	0.0541011	0.0492054	0.0925903	0.0702628	0.0945297	0.0646573	0.0848968	0.1197	0.0540505	0.0574398	0.116815	0.0936896	0.120739	0.0576052	0.107536	0.0817193
5108	Cer/NS(d19:1/22:0)	0.583356			DASQSCYWVZWIRE-JMUUFCRMSA-N	680.611	562.706	0.0665917	0.429853	0.254979	0.334083	0.295107	0.282889	0.297821	0.647569	0.652803	0.222654	0.595078	0.435269	0.507509	0.647727	0.433435	0.695637	0.318493	0.25073	0.491487	0.867062	0.436339	0.445869	0.355287	0.354354	0.317443	0.415321	0.258265	0.310153	0.382618	0.310703	0.343562	0.279757	0.340416	0.390876	0.329907	0.237533	0.505153	0.393358	0.475626	0.193423	0.399278	0.351945
4743	Cer/NDS(d18:0/21:1)	0.582505			VBKWMQPBFDDQHF-MRCUWXFGSA-N	652.587	558.212	0.425844	1.84959	0.74212	1.21236	1.20093	1.7489	1.29654	2.21936	2.77276	2.08973	2.59803	1.6725	2.47012	3.03808	1.72955	2.74961	1.71729	0.946253	2.21613	2.70799	1.87018	2.34472	1.68989	1.65625	1.47704	2.11046	1.34917	1.27344	1.56384	1.52158	1.44602	1.5924	1.65514	2.03847	1.28746	1.3463	2.3582	2.05305	2.18903	0.854828	1.6933	1.67503
6507	PE(19:2/20:4)	0.579793			VOHFIDPWQQXEIA-YRKKIBHTSA-N	776.534	372.14	0.0948958	0.202785	0.0898802	0.163935	0.116483	0.139848	0.132869	0.155323	0.150277	0.118427	0.171544	0.100687	0.129519	0.187785	0.158963	0.204065	0.128866	0.129697	0.119117	0.210986	0.145298	0.233953	0.116003	0.08744	0.129596	0.181294	0.154872	0.1118	0.171576	0.139613	0.0941843	0.15203	0.0965112	0.17611	0.134167	0.145276	0.215319	0.215421	0.147027	0.152617	0.116015	0.148541
7118	PE(22:2/20:3)	0.578746			CHIBHDLYFRVNDX-DYXXURTGSA-N	820.537	482.427	0.523928	1.16125	1.05205	0.934403	1.21557	1.44091	1.58815	1.41988	1.52865	1.27239	1.17346	1.52366	1.40398	1.14182	1.2443	1.11744	2.09797	1.33556	1.19064	1.48548	1.29257	1.35625	1.21566	1.51565	0.956839	1.22955	1.13556	1.2095	1.23292	1.64685	1.40752	1.30233	1.21614	1.46598	1.09356	1.09227	1.09107	1.74383	1.45482	1.05731	1.26565	1.28446
4284	Cer/NS(d18:2/18:0)	0.575637			WNPWDGNHTKGEDS-LLRUVXLESA-N	608.525	463.979	0.452581	1.00575	0.602135	0.88395	0.755245	0.92279	0.738025	1.324	1.59756	1.09914	1.0906	1.75846	1.14895	1.53194	1.37889	1.30308	1.23672	0.852302	1.39547	1.51754	1.12976	0.90122	0.810544	0.620982	0.990547	1.05483	0.89446	0.676233	0.827257	0.898714	0.738901	0.669568	1.16278	1.23509	0.524134	0.880917	1.41284	0.995832	1.22042	0.962759	1.26922	0.937362
3672	Cer/NS(d18:2/14:0)	0.575485			HCVPOJMMIOHQJA-ZSVMZQBZSA-N	552.463	359.502	0.0288006	0.258316	0.0598154	0.181093	0.104117	0.168304	0.139709	0.281718	0.292135	0.144319	0.269397	0.18105	0.250509	0.367843	0.321114	0.39792	0.167896	0.153593	0.254794	0.359301	0.219087	0.285639	0.162532	0.126181	0.182149	0.287913	0.209782	0.213169	0.226396	0.165887	0.232874	0.232984	0.147995	0.402648	0.1532	0.174447	0.198737	0.30101	0.233915	0.132455	0.200135	0.213503
5462	Cer/NS(d19:1/24:1)	0.575435			MGHUDKIXBSFFDS-HVZKQDKLSA-N	706.593	550.364	0.0270455	0.0998637	0.0623187	0.0959359	0.0835473	0.096978	0.0957231	0.107667	0.0923724	0.105422	0.129866	0.0790399	0.105554	0.140521	0.136967	0.0969174	0.133298	0.0608402	0.119538	0.14848	0.100895	0.110859	0.0813991	0.0640422	0.0720521	0.0996429	0.0913521	0.0932411	0.107105	0.0783331	0.0995064	0.0763407	0.106644	0.0980537	0.0842869	0.0913672	0.159972	0.141711	0.130598	0.0536321	0.116399	0.0978269
3766	PE(6:0/17:1)	0.574925			RVESVCVTYWVHNH-QXMHVHEDSA-N	562.351	154.91	0.0891565	0.250147	0.0956489	0.24018	0.298434	0.164776	0.132923	0.245307	0.201275	0.0756286	0.272108	0.115096	0.13484	0.173493	0.166793	0.24696	0.129739	0.160532	0.0946336	0.264991	0.177633	0.348103	0.270412	0.288739	0.191434	0.395618	0.310766	0.152051	0.314041	0.137485	0.249017	0.17538	0.188997	0.300774	0.284067	0.168834	0.244419	0.127391	0.279975	0.103413	0.227194	0.237906
5422	PA(18:0/18:0)	0.574835			YFWHNAWEOZTIPI-UHFFFAOYSA-N	703.538	480.789	0.248114	1.0147	0.638698	0.683167	0.550625	0.738333	0.613704	0.810647	0.918341	0.546481	0.79874	0.593054	0.603853	0.760485	0.84457	0.917837	0.706738	0.553791	0.647146	0.806004	0.699752	0.72253	0.491759	0.545137	0.743014	0.455912	0.444044	0.865003	1.01147	0.714175	0.919296	0.728608	0.597574	0.00966576	0.743003	0.691505	0.875212	0.821988	0.777497	0.379286	1.00325	0.676996
8816	GlcADG(21:2/26:4)	0.573108			ORBCWAYDOFALPC-TZMOUAQLSA-N	941.692	628.29	0.240319	1.0112	0.528455	0.679983	0.77415	0.839148	0.774838	0.900338	0.909848	0.910655	1.02122	0.564697	0.441066	1.09907	0.951864	0.716112	0.707465	0.319068	0.806686	1.00944	0.760281	1.24543	1.05549	0.917569	0.895905	0.715886	1.05973	0.90084	1.26789	0.698721	1.0137	0.737729	0.730292	0.653432	0.828664	0.799404	1.36226	1.03924	1.13765	0.393294	0.57572	0.901442
8496	GlcADG(19:2/26:4)	0.573108			QCGMHKACPIOWKY-UPASBRHPSA-N	913.66	581.265	1.16345	5.27499	3.1932	4.21361	4.61049	4.14316	4.64633	5.47286	5.8215	5.01142	7.70559	3.53784	4.59076	5.70152	4.16778	5.20243	3.66263	2.81831	4.4542	6.29942	4.58457	5.711	4.49199	5.85768	3.91884	3.80835	3.5765	4.35851	6.53427	3.50671	5.73262	3.84047	3.78475	4.58469	4.9296	3.57174	5.81198	5.59355	6.19406	2.39046	3.20192	4.56999
8123	GlcADG(17:2/26:4)	0.573108			FOFLFROPGMROHZ-NFYCTIBJSA-N	885.631	536.151	0.321993	0.816823	0.527577	0.698684	0.728243	0.820959	0.713125	0.824845	0.98858	0.771539	0.949673	0.566292	0.753911	1.02393	0.620807	0.816784	0.655001	0.449866	0.703125	0.793406	0.727258	1.21791	0.743157	0.926352	0.706534	0.778224	0.686692	0.712581	0.819621	0.781001	0.72204	0.720661	0.733312	0.870997	0.759796	0.753334	1.02392	0.994042	0.860765	0.50666	0.546652	0.793213
7193	PC(18:0/18:5)	0.571373			RNVGZODXVTVDTM-FUKQIHFBSA-N	824.544	353.26	0.195588	0.534172	0.273391	0.458252	0.355054	0.327333	0.359158	0.416848	0.425213	0.497744	0.427519	0.16258	0.267245	0.489742	0.455713	0.571339	0.260665	0.307707	0.328354	0.500268	0.380694	0.508419	0.455011	0.0110542	0.266637	0.27497	0.300823	0.450717	0.453598	0.413598	0.247404	0.33506	0.302386	0.338968	0.408723	0.403592	0.62863	0.687622	0.459062	0.212143	0.38567	0.377204
3767	PE(2:0/21:1)	0.569101			FDPARMCMUIQSPH-QXMHVHEDSA-N	562.351	118.673	0.0474153	0.183557	0.0544935	0.136977	0.0788671	0.0986797	0.0838693	0.174	0.125073	0.0393927	0.175766	0.0831801	0.111125	0.131389	0.119024	0.111473	0.108751	0.135929	0.0611178	0.151398	0.110574	0.170345	0.162408	0.132441	0.163603	0.22077	0.132532	0.125501	0.191645	0.0776445	0.157591	0.108798	0.116969	0.13276	0.140174	0.0973703	0.137077	0.0572298	0.15466	0.072058	0.176789	0.136418
6524	PE(19:1/20:4)	0.567984			SHGLDTCYCHVFQR-UCBGEFNCSA-N	778.561	361.094	0.0472358	0.0283564	0.037169	0.0151131	0.0351557	0.014381	0.0472527	0.0411703	0.0379931	0.0386498	0.0306463	0.0397191	0.0163339	0.0460227	0.0409927	0.0281947	0.0419536	0.0315488	0.0336622	0.0525533	0.0352052	0.0276107	0.0360538	0.0227534	0.0315972	0.0508007	0.0254756	0.0409729	0.0422798	0.0260587	0.0475959	0.0417565	0.0388815	0.044971	0.036286	0.0331355	0.0441192	0.0504151	0.0437945	0.0403138	0.0517842	0.0388328
7691	HexCer/NS(d14:3/32:2)	0.566912			UJQZFFLOSDRMMM-HKIYFZQESA-N	858.678	550.13	9.682	27.8471	28.1398	25.0265	14.597	17.1886	23.1569	27.7609	37.6078	24.9634	27.999	16.9068	18.8802	25.9346	26.1093	23.5107	17.8765	23.991	19.1966	28.2023	23.2288	21.024	20.6101	23.8164	18.2187	21.3121	15.4445	16.3324	18.6076	20.8811	25.0549	19.8455	11.8971	43.7704	30.3856	13.8638	26.448	21.1799	18.7467	12.1735	19.9406	20.9776
6129	HexCer/NS(d14:1/24:2)	0.566912			ADTCINSRXFKCGQ-WJADFGSRSA-N	750.583	421.088	0.667576	0.970707	0.962365	1.37144	0.886127	0.926913	0.811805	0.881647	0.815207	0.806837	1.02255	0.649433	0.826808	0.811132	0.818109	0.68598	1.1177	0.951434	0.92561	0.718877	0.881413	1.1625	0.777762	0.560706	0.801959	1.21721	0.647565	0.870867	0.852323	1.16114	0.943072	0.696429	0.59825	0.680053	0.921954	0.851857	1.44451	1.05716	0.765448	0.837092	0.838322	0.884309
6098	HexCer/NS(d14:2/24:2)	0.566912			NMAZCJFXJQWHNA-ZSBJVTRHSA-N	748.568	398.529	20.5776	38.8471	32.4182	40.9468	32.873	34.9515	34.9633	35.678	41.8707	31.7319	43.9778	26.7905	30.3899	38.6193	32.3698	36.8826	34.3583	32.675	32.6099	38.7633	34.6147	43.8449	31.0984	32.9876	32.028	34.5473	33.1975	33.3473	38.7618	36.5932	35.2725	33.7922	26.6562	37.6948	35.8571	30.9597	43.7194	39.9276	35.4396	24.7714	31.864	34.618
3815	Cer/NDS(d18:0/15:1)	0.565617			ZTSYNZKITUNRCR-OWBHPGMISA-N	568.493	431.625	0.49755	1.37138	0.63882	0.906313	0.756389	1.27491	0.733108	1.62478	1.81959	1.0088	1.33836	1.56008	1.73328	1.50388	1.60779	2.13004	1.20154	0.909248	1.58198	1.59644	1.28971	1.40301	1.11195	0.937585	1.00336	1.4794	1.1178	0.897842	0.862611	1.02891	0.988135	1.09508	1.04874	1.54827	0.870488	0.904291	1.59009	0.952725	1.24915	0.836911	1.37607	1.11512
4878	Cer/NS(d18:1/22:2)	0.56274			MTDAMRAUGJGLBS-JBXBRXDESA-N	662.573	508.918	0.529447	2.41275	1.49196	1.91892	1.59793	2.98713	1.25701	2.44282	2.94353	3.43023	2.61019	2.13337	1.76795	3.68169	2.78915	2.04292	2.12766	1.35544	2.54333	3.59373	2.28286	2.47859	2.43041	1.08831	1.85307	2.56466	1.57391	1.74139	1.80742	1.7097	1.70242	1.92903	1.23856	2.03611	1.46411	1.39735	2.85045	2.68138	1.80814	1.33271	1.97296	1.88303
5107	Cer/NDS(d20:0/21:1)	0.561814			ZQKHRIMUQPCCTQ-LNVKXUELSA-N	680.62	590.852	1.48525	8.21911	3.75543	6.65255	6.56326	6.50767	6.83837	12.2281	11.9668	10.6484	17.1586	6.8459	11.2577	14.453	8.71876	14.3164	6.7054	4.84682	9.26177	17.4649	9.29471	9.1494	8.65317	8.69724	6.27382	8.00201	5.7631	7.42475	10.9957	5.34557	9.20718	7.34126	6.87219	9.60358	7.66661	5.5483	10.6346	10.1953	13.5944	3.29942	7.23069	8.07492
5668	Cer/NS(d18:1/26:1)	0.561107			IBJXLRPUPQTCQS-SJWJHEOESA-N	720.642	578.419	0.0254338	0.163447	0.0829667	0.183624	0.0822914	0.143813	0.114579	0.11531	0.126805	0.155289	0.131356	0.0927762	0.104069	0.18307	0.202705	0.148646	0.154709	0.0703823	0.146349	0.183373	0.13055	0.144281	0.126226	0.0592455	0.10353	0.126819	0.135493	0.122614	0.114517	0.0919377	0.130666	0.109054	0.0592731	0.151369	0.105382	0.0825258	0.209106	0.22752	0.131543	0.068421	0.109332	0.120443
7247	HexCer/AP(t29:0/12:1)	0.55229			SMYRABXMWKTEQE-PNOGMODKSA-N	828.646	604.354	0.136769	0.762644	0.403702	0.742695	0.545243	0.739426	0.651015	0.684262	0.578085	0.705113	1.06705	0.37815	0.473748	0.789573	0.798762	0.700598	0.705792	0.5588	0.714194	0.850704	0.649316	0.911884	0.542723	0.519723	0.490656	0.6215	0.59456	0.610525	0.763458	0.549446	0.879213	0.546902	0.626022	0.8232	0.54579	0.493869	1.39571	0.898888	0.656586	0.301277	0.546276	0.665911
6557	PE(18:2e/22:2)	0.552233			JWICLJISDBHCTF-MAZCIEHSSA-N	780.59	534.466	0.317214	1.30208	0.827721	1.13847	0.891724	1.66402	1.01069	1.53499	1.57347	1.28739	1.82622	0.870713	1.34017	2.02418	1.24241	1.40866	1.59103	1.01282	1.51428	2.08465	1.32315	2.13781	1.12162	1.28016	1.15425	1.27028	0.993934	1.29472	1.56979	1.5541	1.48722	1.14848	1.47964	1.54977	1.30237	0.902243	2.17334	2.44293	1.36822	0.388832	1.16597	1.38928
6680	PE(20:2/20:4)	0.551357			XSLAGHHVEDVPBE-MDCIFNJCSA-N	790.528	405.144	0.371367	2.34279	4.22263	1.20837	1.39177	1.76232	2.04622	2.78723	3.86369	3.02584	2.93188	2.12925	2.1329	2.87503	5.10709	2.70511	1.91997	1.34694	4.97897	3.06514	2.61073	2.82833	2.16412	2.92642	2.37473	1.82574	1.59027	2.69684	2.55195	1.47689	3.44947	2.31313	1.18203	3.75456	3.16655	2.47476	2.99083	3.11054	3.02914	0.86775	2.21999	2.4497
3487	PE(2:0/19:1)	0.548325			NEAUWFWSASVTBS-QXMHVHEDSA-N	534.319	107.535	0.0803234	0.302247	0.123633	0.214437	0.291983	0.146836	0.145517	0.110582	0.176172	0.0766167	0.280571	0.107294	0.121811	0.20265	0.180634	0.194809	0.147004	0.169187	0.109804	0.219995	0.170105	0.320697	0.275159	0.264704	0.272842	0.398674	0.32452	0.233097	0.396146	0.166753	0.290817	0.201277	0.186038	0.292871	0.308814	0.181227	0.326284	0.158823	0.255896	0.0900496	0.305594	0.262514
6795	PE(20:1/20:1)	0.547854			XKHVUVBUSFQMDX-CLFAGFIQSA-N	798.599	545.356	0.0945667	0.252026	0.143471	0.203271	0.227779	0.341843	0.543849	0.538442	0.461678	0.272928	0.353956	0.149537	0.129844	0.280799	0.199861	0.765213	0.249789	0.159729	0.212441	0.654074	0.311755	0.394202	0.235419	0.220515	0.255027	0.182919	0.471344	0.269561	0.400532	0.217802	0.201755	0.260232	0.278797	0.758207	0.431152	0.28958	0.400506	0.494679	0.241834	0.143426	0.163531	0.315551
3265	PE(5:0/15:1)	0.54754			IKOFMONZNNQXIK-KTKRTIGZSA-N	520.304	102.261	0.0792175	0.296977	0.103875	0.158907	0.22877	0.163266	0.133477	0.219981	0.19631	0.0730824	0.295598	0.114398	0.156812	0.191425	0.173367	0.208145	0.179435	0.172023	0.0909711	0.221752	0.17289	0.342722	0.286707	0.277609	0.264364	0.286378	0.291485	0.183987	0.376336	0.1292	0.241683	0.186341	0.18941	0.235994	0.332531	0.187383	0.281027	0.0962654	0.313825	0.101157	0.269912	0.243716
6914	PS(16:0/22:6)	0.546716			PWBBJQOVCTWPIM-LGFBOSHVSA-N	806.496	320.531	0.0899764	0.59483	0.476499	0.459209	0.518531	0.5058	0.486855	0.623698	0.947393	0.674909	0.544022	0.551093	0.470939	0.91241	0.482025	0.631566	0.408619	0.419958	0.493498	0.693719	0.549277	0.857517	0.634789	1.19229	0.562979	0.527059	0.543816	0.798617	0.89178	0.607484	0.736165	0.701468	0.428746	0.812537	0.581599	0.484044	1.01047	1.0089	0.742672	0.387449	0.537693	0.702404
6706	PE(18:1/22:4)	0.546654			FYSNFSXQLYXNMN-DCMOKHIZSA-N	792.546	448.2	0.840978	3.57177	3.53533	2.89363	2.4842	3.46393	4.41658	4.42447	5.22807	4.65052	4.43371	3.14725	3.28753	5.44481	4.14911	3.09086	4.68449	2.56352	3.32875	4.67971	3.71596	3.90129	3.32131	4.75226	3.04802	3.27462	2.64704	4.04926	4.71914	3.44863	7.20905	3.84866	3.73839	5.34631	4.91396	3.53418	5.37645	5.33972	5.30922	1.77379	3.17267	4.1362
5079	Cer/NDS(d19:0/22:2)	0.540777			MRTXQLDINLJEQF-CCLKJPSRSA-N	678.558	514.326	0.217049	0.509965	0.41041	0.420333	0.419733	0.442142	0.384457	0.56211	0.522044	0.489606	0.667443	0.531629	0.517064	0.690399	0.721989	0.609565	0.486645	0.408483	0.685995	0.728066	0.521256	0.401027	0.447112	0.324643	0.415351	0.439454	0.375736	0.368809	0.454288	0.366408	0.473814	0.362827	0.415398	0.490641	0.402043	0.377834	0.551504	0.547749	0.511938	0.349478	0.59045	0.433325
3687	Cer/NDS(d19:0/13:1)	0.539912			IRMGJRJURQPLNH-BENRWUELSA-N	554.479	406.217	0.734493	2.32402	0.781145	1.84246	0.993099	1.93652	1.08774	2.39139	2.331	1.29974	2.09214	2.33768	3.24504	2.74975	2.80577	3.58162	1.8303	1.68565	2.32529	2.63153	2.05032	2.57464	1.52957	1.10566	1.93576	2.25879	2.23753	1.69855	1.45334	1.83657	1.38894	1.95041	1.61101	2.52835	1.3627	1.49504	2.81212	1.99999	2.19766	1.58713	2.1499	1.88568
7003	PE(20:4/22:5)	0.538365			JLFBIHQMUDHBEC-MYTICKLQSA-N	812.525	378.731	0.453654	2.31677	1.91793	2.45907	1.79021	2.43765	3.04658	3.43826	3.46891	3.08328	3.20919	1.50878	2.56275	3.8904	1.95984	1.98228	1.96012	1.57428	2.51744	2.86692	2.42221	2.75965	2.45375	2.89023	2.0473	2.19338	1.62472	2.52434	2.99048	2.74339	2.82037	2.93881	2.27821	3.65561	6.01499	1.78675	4.3896	2.7727	2.68399	1.28403	1.56003	2.72062
10988	CL(16:0/18:1/18:1/18:2)	0.537673			ANTTZFFJZZAXFT-BZQFJKNOSA-N	1427.99	625.077	0.048768	0.220083	0.148701	0.135455	0.184097	0.186455	0.251837	0.29426	0.365997	0.181344	0.271073	0.206257	0.251969	0.304723	0.226425	0.224432	0.198071	0.191408	0.216909	0.531061	0.231966	0.274868	0.29252	0.381377	0.191552	0.20228	0.198925	0.228617	0.259316	0.249483	0.26931	0.205954	0.243817	0.321043	0.299862	0.173424	0.280961	0.387443	0.237226	0.114352	0.21808	0.25152
7302	PS(18:1/22:6)	0.536979			FZVOBDJBRIEKPS-HILQMKNTSA-N	832.512	324.836	0.0354258	0.265866	0.186817	0.173636	0.184776	0.227413	0.249211	0.336172	0.46322	0.401997	0.332649	0.0293586	0.244968	0.265828	0.403234	0.291839	0.254338	0.139035	0.265366	0.283172	0.251716	0.744204	0.315206	0.660131	0.322004	0.196298	0.104797	0.298292	0.22334	0.232849	0.628677	0.298673	0.157708	0.312238	0.441387	0.277814	0.467748	0.564927	0.44824	0.134729	0.24151	0.353539
11020	CL(18:2/18:2/18:2/18:2)	0.5361			LSHJMDWWJIYXEM-RGLFHLPNSA-N	1447.97	580.933	0.674706	2.93884	1.90034	3.03261	2.54003	4.07597	2.76604	2.73329	2.74953	3.81707	3.96792	1.63244	1.79312	3.96548	2.8607	3.36773	2.30497	1.88334	2.74643	3.85416	2.78024	4.71258	2.06034	3.02465	2.17784	2.38146	2.48085	2.55465	3.38798	2.74486	3.04266	2.77123	2.08784	2.96827	1.99105	2.63327	4.69406	4.35101	3.43939	1.40073	2.94308	2.89239
5634	Cer/NS(d18:1/26:2)	0.533014			NASWINSPRXVIEJ-DXHDNSKDSA-N	718.634	578.421	0.241409	1.38468	0.796706	1.45818	0.849672	1.24215	0.958883	1.05501	1.19975	1.21044	1.38808	0.914622	0.987437	1.62802	1.61174	1.29528	1.31361	0.782641	1.20951	1.66471	1.15963	1.38224	1.06123	0.662492	0.880773	1.11508	1.0703	1.06812	1.14401	0.835783	1.23577	0.919468	0.72343	1.22185	1.08433	0.877743	1.69568	1.78442	1.28105	0.568265	1.05266	1.08323
5467	Cer/NS(d18:2/25:0)	0.531552			SHGDZPJYRJJAQG-INARCNGISA-N	706.636	592.799	0.117393	0.166047	0.577272	0.462943	0.476688	0.331081	0.407954	0.793019	1.53114	0.107521	0.128074	0.437703	1.46271	1.61001	1.07755	0.760522	0.795872	0.253052	0.107785	1.22271	0.641352	0.651992	0.621168	0.521256	0.076049	0.4701	0.610213	0.512834	1.03892	0.705792	0.130834	0.0852238	0.199837	1.42402	0.895818	0.359562	1.63827	1.15616	0.138635	0.189667	0.604107	0.601523
9086	HexCer/AP(t23:0/28:2)	0.528004			OXMDEDOGACQRDW-GKKPSEFHSA-N	966.779	625.664	0.0318945	0.071749	0.0180477	0.0542694	0.0539142	0.038152	0.0302475	0.0587165	0.0318564	0.00629152	0.0694614	0.0247247	0.0410959	0.0435629	0.0468828	0.0508051	0.0273078	0.0429094	0.0140778	0.0626721	0.0409319	0.0785847	0.0257337	0.0199458	0.0304682	0.03075	0.0403729	0.015144	0.0585752	0.00685868	0.0260773	0.0130838	0.0141465	0.0305208	0.0285262	0.0382676	0.0298855	0.00631552	0.0257905	0.025032	0.0334756	0.0288777
6685	PE(18:2/22:4)	0.527262			WAXVPXCHRJVWEI-POQXSWCRSA-N	790.537	379.079	0.0601733	0.227127	0.138645	0.207344	0.153985	0.234262	0.218464	0.240381	0.254713	0.190577	0.237469	0.132549	0.170708	0.256723	0.173313	0.255093	0.143156	0.141529	0.148119	0.249959	0.191714	0.25178	0.230489	0.252536	0.157598	0.17071	0.185404	0.202665	0.229872	0.193011	0.17411	0.205935	0.193207	0.23418	0.250434	0.159324	0.278445	0.247884	0.197848	0.0841364	0.160156	0.202986
5667	Cer/NDS(d16:0/28:2)	0.523316			GCGMNWPAWVMYIN-XUQDTYRNSA-N	720.652	604.13	0.408458	1.29804	0.914524	1.22216	0.70249	0.976016	0.837922	1.07884	2.18971	1.17388	1.1363	1.81421	0.935134	1.24251	1.37982	2.0698	1.28179	1.37207	0.981766	1.40749	1.22115	1.24061	0.87704	0.671459	0.997982	1.09307	1.10343	1.11182	0.630441	1.32309	1.10576	0.859194	0.613256	1.87674	1.01965	0.809679	1.4265	1.03974	0.842917	0.901998	1.13585	1.03401
7554	HexCer/AP(t26:0/12:0)	0.521309			VMBNRKUJAHBMES-UHFFFAOYSA-N	848.667	706.782	0.268329	0.354143	0.235954	0.20388	0.406739	0.374897	0.346062	0.365568	0.318753	0.193334	0.250684	0.193823	0.165295	0.2711	0.283253	0.244975	0.367004	0.204719	0.339658	0.361959	0.287506	0.316304	0.383964	0.461625	0.448262	0.228071	0.363205	0.224757	0.497684	0.15946	0.381299	0.171084	0.355565	0.325838	0.276426	0.209292	0.303752	0.327462	0.355477	0.116935	0.320063	0.311326
6307	PC(16:0/15:1)	0.521001			UPVBGIUAKUZSSB-ICFOKQHNSA-N	762.533	446.513	0.0503508	0.210112	0.238814	0.0491564	0.157536	0.297383	0.198938	0.151002	0.361519	0.23458	0.309311	0.215158	0.251937	0.373765	0.239442	0.218209	0.22874	0.160946	0.192366	0.35841	0.224884	0.367295	0.225032	0.289054	0.178143	0.264235	0.192051	0.299308	0.186133	0.19794	0.242037	0.245126	0.225809	0.245868	0.236457	0.182131	0.323591	0.209652	0.338677	0.136925	0.226058	0.240576
6432	MGDG(14:1/18:1)	0.519202			HQCWOLCWMCNMEM-IFVCHSSZSA-N	771.516	300.689	0.23379	1.02269	0.706977	1.76764	0.795976	0.919205	0.690311	0.627475	0.726538	0.886409	1.0035	0.278136	0.438188	0.543851	0.576773	1.01401	0.468757	0.564243	0.67316	1.49026	0.771395	1.31513	0.604849	0.659567	0.586579	0.707211	0.529015	0.930771	1.02763	0.668031	0.940458	0.884485	0.442495	0.877636	0.544347	0.503209	1.22486	1.05188	0.689428	0.306239	0.491901	0.749286
5239	Cer/NS(d18:2/24:1)	0.516892			KADBCXSPXAVXJL-QWGNBJIWSA-N	690.579	535.396	0.479127	1.49154	1.06945	1.7539	1.80756	1.08675	0.850757	1.81343	1.51506	1.6134	2.67092	1.84899	1.69201	1.91683	1.91935	1.5347	1.28163	1.81312	1.13434	1.49049	1.53917	3.17852	1.40554	1.05656	1.04183	1.34089	0.981208	0.852511	2.11246	0.937606	1.43144	0.752652	0.348533	0.47938	1.02061	0.877652	0.807381	0.85851	2.4161	1.1091	1.60106	1.23048
6883	PC(8:0/26:1)	0.516799			HINNCFGUVNHVTC-HNENSFHCSA-N	804.566	425.41	5.20723	11.2618	8.63399	12.1474	10.7224	10.2249	10.2758	9.32822	10.4651	6.86048	12.5974	7.96367	8.59424	6.72288	9.63067	14.102	9.70463	8.96997	9.91823	12.6719	9.80014	14.7099	9.18333	9.74113	9.6537	9.33285	5.90109	9.87191	13.0124	10.0391	5.34379	10.3953	8.03033	10.3218	8.74051	10.5321	14.0955	9.00412	11.6632	8.30826	10.4207	9.91506
9085	HexCer/AP(t15:0/36:2)	0.513664			ALSMLQXAPIEOOL-VYEFPUSRSA-N	966.791	645.075	0.239928	0.530056	0.137666	0.40365	0.393536	0.350311	0.206729	0.457869	0.329571	0.0922573	0.544817	0.298912	0.37072	0.341521	0.387442	0.48467	0.298123	0.395631	0.163357	0.509017	0.346789	0.522653	0.238724	0.198583	0.218654	0.28745	0.292047	0.148103	0.445929	0.11331	0.201905	0.121009	0.148343	0.307099	0.182519	0.35011	0.206191	0.0938662	0.236828	0.213892	0.24562	0.238642
9064	HexCer/AP(t15:1/36:2)	0.513664			DBYWUNKLYKSYAM-MGMUWRIPSA-N	964.771	625.326	0.174561	0.372376	0.116676	0.301359	0.268945	0.225	0.16782	0.273121	0.181463	0.0717103	0.367822	0.154659	0.214543	0.235658	0.253381	0.248206	0.177208	0.242224	0.125458	0.296681	0.223444	0.380376	0.156349	0.119014	0.165357	0.19186	0.216463	0.101544	0.309712	0.0833874	0.154462	0.0866207	0.101743	0.178008	0.166596	0.222416	0.167455	0.0661326	0.16249	0.150023	0.192676	0.168634
8782	HexCer/AP(t15:0/34:2)	0.513664			VPBZMZYWTXVGPC-VYEFPUSRSA-N	938.759	621.918	0.248531	0.710839	0.179427	0.417507	0.529219	0.353949	0.254972	0.510629	0.342383	0.120382	0.659761	0.294564	0.424545	0.459972	0.473042	0.427917	0.364789	0.547327	0.195068	0.519596	0.401721	0.529396	0.284096	0.227108	0.364418	0.337757	0.342086	0.220683	0.62121	0.131312	0.285982	0.164343	0.179476	0.314002	0.272246	0.409713	0.274388	0.110222	0.281662	0.201442	0.410067	0.29808
7061	PC(18:0e/18:2)	0.496601			LMGTVCKIUNTOEP-IUFKAHDJSA-N	816.611	510.51	0.202987	0.851212	0.467784	0.394601	0.719558	0.900459	0.861557	0.766707	0.926199	0.572335	1.21824	0.583066	0.460554	1.07696	1.02083	0.994304	0.387809	0.811176	0.432941	1.03009	0.733969	1.14013	0.820012	0.626647	0.28518	0.689412	0.422271	0.329639	0.415799	0.351157	0.857548	0.606887	0.316415	0.789479	0.688441	0.356435	0.769167	1.39717	1.20658	0.644008	0.893531	0.680295
5049	Cer/NS(d17:1/24:2)	0.48787			HCETVLPDOIROEI-LUNOBEJWSA-N	676.621	559.855	0.169656	0.197825	0.147367	0.169621	0.157856	0.162145	0.145258	0.139454	0.143957	0.157735	0.138304	0.142758	0.150688	0.135903	0.141235	0.136681	0.16963	0.163209	0.176999	0.142508	0.154439	0.126623	0.17388	0.145728	0.184374	0.164086	0.181183	0.127221	0.13709	0.15836	0.157312	0.147342	0.143896	0.138349	0.146393	0.165954	0.147047	0.151031	0.144019	0.165565	0.157712	0.153158
5443	Cer/NS(d19:1/24:2)	0.43659			HDIPDCUOBLJDEU-HAKIKJNOSA-N	704.632	574.899	0.336418	0.888912	0.427696	0.684253	0.75049	0.80656	0.772512	0.836937	0.946048	0.98127	1.01965	0.673225	0.894213	1.04723	0.805924	0.890993	0.985723	0.674019	0.816266	0.866079	0.805221	0.875996	0.892342	0.812559	0.829477	0.88852	0.788027	0.78865	0.961167	0.797363	0.736494	0.890999	0.774979	0.701017	0.69118	0.746998	0.882212	0.998735	1.05373	0.579072	0.819622	0.825457
5635	Cer/NS(d23:2/21:1)	0.40657			HOKSRTLMTINPPA-FQLSWWCXSA-N	718.647	591.352	0.100921	0.505342	0.237157	0.366616	0.396606	0.345796	0.392624	0.583346	0.601941	0.490669	0.710818	0.395774	0.549297	0.577473	0.440369	0.652819	0.384423	0.286498	0.48111	0.664697	0.458215	0.477107	0.480769	0.437654	0.36492	0.402766	0.336629	0.365278	0.482841	0.307124	0.476014	0.396452	0.39215	0.465387	0.384451	0.317671	0.505789	0.46832	0.663849	0.199926	0.373185	0.414914
5433	Cer/NS(d18:2/25:1)	0.405266			TUYKPRFCRLPEFF-QOESPIHISA-N	704.618	561.725	0.466474	0.341397	0.089773	0.267807	0.235051	0.371827	0.148306	0.329427	0.28447	0.240162	0.307931	0.25443	0.40488	0.62597	0.565832	0.645872	0.199363	0.108644	0.419838	0.546208	0.342683	0.479772	0.208091	0.180411	0.177849	0.293853	0.270093	0.173374	0.222899	0.140043	0.303903	0.121961	0.134984	0.325327	0.142924	0.104624	0.544919	0.404949	0.384422	0.362943	0.181719	0.257953
1405						305.249	170.405	0.123389	0.594907	0.21605	0.537324	0.360463	0.378	0.707663	0.624602	0.587478	0.525704	0.860443	0.417565	0.72104	0.717819	0.613902	0.605261	0.682916	0.521703	0.45853	1.05174	0.565325	0.481634	0.356827	0.300758	0.510441	0.638807	0.572756	0.433379	0.401759	0.470254	0.422335	0.36765	0.411967	0.683784	0.577608	0.445526	0.983304	0.629656	0.654933	0.283301	0.423038	0.502486
1404						305.249	156.905	0.520906	5.3418	1.58539	1.53653	1.89338	1.58051	5.13412	5.26991	4.57127	4.53125	8.62363	2.98153	7.68913	7.99174	5.63592	3.96447	5.35802	3.66051	3.83998	9.04067	4.53753	3.39087	2.60855	2.22513	3.69334	4.73563	3.1104	3.36462	3.55456	2.34158	3.07481	2.74721	3.82337	5.29766	6.43907	2.52684	6.74914	5.25921	7.06561	1.6264	4.24916	3.89416
1235						281.239	140.423	0.042881	0.0721054	0.0213587	0.0828918	0.0496387	0.0421421	0.0786263	0.0787737	0.0856102	0.137171	0.153157	0.0576926	0.0920823	0.133025	0.112309	0.140766	0.0748337	0.0556602	0.104495	0.177733	0.0896476	0.0491728	0.0359567	0.0188324	0.0502715	0.061884	0.0701846	0.0392465	0.0559074	0.0398779	0.0657144	0.0487432	0.0251488	0.0892357	0.0420215	0.0423727	0.141539	0.132555	0.118056	0.0250323	0.0638432	0.0607798
1387						303.232	130.306	12.9693	79.4308	51.354	64.7594	39.6491	57.8878	82.3636	94.0947	89.6553	79.38	114.404	71.1986	80.0301	87.8673	103.132	101.518	101.584	66.8632	101.822	174.927	82.7445	46.1366	45.9368	44.943	63.3731	79.332	71.5967	43.929	52.4259	51.666	64.5539	52.279	59.2679	99.0012	60.5763	40.3641	127.524	78.1401	81.8264	40.2639	60.7298	63.1933
1402						305.239	130.191	0.290435	1.85489	1.22341	1.57986	0.97152	1.37389	1.97609	2.24425	2.16559	1.93771	2.73015	1.7429	1.9004	2.13636	2.4638	2.4152	2.40758	1.64079	2.40177	4.19266	1.98246	1.14328	1.09589	1.06965	1.48858	1.99978	1.7224	1.00742	1.25507	1.24457	1.54322	1.22111	1.44081	2.33963	1.43641	0.984759	3.08973	1.88548	2.02775	0.951293	1.442	1.51944
1640						329.239	116.491	0.0552742	0.4744	0.218492	0.153929	0.154564	0.193035	0.461813	0.675071	0.696681	0.605224	1.07846	0.607577	0.511248	0.677058	0.603541	0.495583	0.484405	0.277339	0.39227	0.698197	0.475708	0.299171	0.247248	0.43882	0.256516	0.384458	0.367958	0.242651	0.315701	0.203807	0.436124	0.273352	0.212215	0.82989	0.546025	0.256178	0.765	0.586849	0.84542	0.156285	0.441686	0.405268
1629						327.232	116.391	1.91382	16.7678	7.8454	5.58418	5.39828	6.79895	16.1472	23.7303	24.7709	21.3774	38.083	21.1472	17.8295	23.5434	20.4524	16.3458	16.0233	9.84953	13.443	24.574	16.5813	10.4842	8.54837	15.3907	9.25417	13.3871	12.4775	8.42776	11.0029	7.03569	15.5264	9.66723	7.60072	29.4071	19.6171	9.1797	26.5849	20.4567	30.1628	5.4715	15.2912	14.2487
9436						1004.77	605.404	0.848643	3.14136	0.99241	2.32046	2.45052	2.38293	1.42295	2.71231	1.99045	0.636347	3.21871	1.4978	2.2746	1.76586	2.13385	1.92581	1.81019	1.94396	0.956283	3.10273	1.97641	1.96473	1.76602	1.37258	1.49489	1.58852	1.537	1.03944	3.09528	0.76241	1.52714	1.02631	1.21953	2.12425	1.52685	1.7866	1.60638	0.560796	1.30636	1.36272	1.74463	1.52062
9541						1016.8	622.123	0.122986	0.312564	0.119589	0.275063	0.247913	0.214931	0.164431	0.331852	0.256154	0.071738	0.336843	0.220023	0.26905	0.21622	0.258365	0.252288	0.194742	0.273848	0.113956	0.344438	0.22985	0.340095	0.171105	0.131319	0.124883	0.228347	0.198083	0.109554	0.255578	0.0921856	0.169339	0.0960101	0.137206	0.208847	0.160241	0.192565	0.145558	0.0581842	0.189205	0.171732	0.175069	0.167755
9724						1040.8	615.197	0.0175802	0.0452197	0.00936243	0.0294424	0.0226714	0.0361921	0.0209072	0.0490664	0.0405499	0.00529057	0.171797	0.030187	0.0350209	0.0343207	0.0428398	0.0388	0.0311875	0.0235304	0.0115932	0.0585288	0.0377044	0.0559159	0.0187478	0.010579	0.0159709	0.0329443	0.0296672	0.0429835	0.0352059	0.00920635	0.0173205	0.0450294	0.0173072	0.0387208	0.0806266	0.0297302	0.0202536	0.0263469	0.0408692	0.0175811	0.0259294	0.0305468
9268						986.746	584.909	0.0475528	0.191256	0.0612076	0.0714942	0.120428	0.118028	0.0955869	0.151363	0.148867	0.0404651	0.190604	0.0136653	0.125654	0.134316	0.15713	0.113216	0.169383	0.150902	0.0611546	0.134793	0.114853	0.195521	0.107721	0.0959257	0.118309	0.0977753	0.113333	0.0843257	0.23763	0.0510449	0.101568	0.0420353	0.073439	0.105661	0.118075	0.147169	0.116102	0.0868355	0.125893	0.083025	0.146802	0.11241
9437						1004.76	581.677	0.0477197	0.163508	0.0698229	0.135901	0.129421	0.121639	0.0689976	0.149917	0.108137	0.0260819	0.15421	0.0890799	0.118839	0.0980858	0.135955	0.151761	0.0890314	0.0923092	0.0678009	0.17104	0.109463	0.105806	0.0739593	0.0666241	0.0836022	0.0875938	0.279716	0.0588956	0.150558	0.0277778	0.0756328	0.0602824	0.0398541	0.110816	0.0674765	0.0971304	0.0727485	0.0181979	0.0619521	0.0576358	0.093489	0.0844874
9638						1028.76	572.346	0.0054744	0.132587	0.0321787	0.0314296	0.0418489	0.0318746	0.0237052	0.119101	0.0744529	0.0104102	0.106061	0.0430704	0.106539	0.0543739	0.0893685	0.0589413	0.0571889	0.0381285	0.0191985	0.0717387	0.0573836	0.0730945	0.0310531	0.0392976	0.0511649	0.0495679	0.0410359	0.0181229	0.0898016	0.00329964	0.0421022	0.0232191	0.00950868	0.0436677	0.0527526	0.0716349	0.0344747	0.00563653	0.0474443	0.0161747	0.0513598	0.0397207
7066						816.528	414.561	0.15459	0.291483	0.303251	0.288841	0.331183	0.356159	0.276558	0.292448	0.40856	0.32947	0.343547	0.323512	0.266345	0.301852	0.271681	0.302539	0.294424	0.280945	0.266536	0.315749	0.299984	0.279381	0.261538	0.353143	0.264623	0.298846	0.248326	0.286416	0.322112	0.330091	0.324774	0.280287	0.304059	0.364642	0.268228	0.29481	0.302392	0.326592	0.242532	0.253739	0.263176	0.293485
7062						816.554	398.073	1.55655	3.04332	2.54965	2.98494	2.51546	2.69242	2.7017	2.78627	3.05966	2.40737	3.2694	2.13381	2.28881	2.57317	2.37294	2.66669	2.42233	2.58569	2.57036	2.85219	2.60164	3.09749	2.41715	2.46103	2.45002	2.40039	2.48405	2.40779	2.92436	2.71073	2.64312	2.44435	2.05534	2.66695	2.52772	2.18331	2.99831	2.91366	2.47309	1.93657	2.32257	2.5259
7065						816.516	313.301	0.00401277	0.0171398	0.00534124	0.0301562	0.00976994	0.00867163	0.00224573	0.0186327	0.0125651	0.00267738	0.019861	0.00863127	0.00299391	0.00739075	0.0155751	0.0146451	0.00755317	0.00681749	0.000956902	0.0137524	0.0104695	0.0117457	0.0108326	0.0154022	0.00502643	0.00775121	0.0103076	0.0033099	0.0125134	0.00169826	0.00810379	0.000769996	0.00308751	0.00721788	0.00987475	0.00859434	0.00449003	0.00215617	0.0137146	0.0052436	0.00365699	0.00727484
7063						816.538	277.442	0.193773	0.50662	0.125259	0.438968	0.425864	0.259297	0.156398	0.368226	0.213131	0.133462	0.472308	0.173654	0.292487	0.290776	0.337435	0.451416	0.242632	0.270644	0.127223	0.372135	0.292585	0.435581	0.301998	0.233215	0.272596	0.337639	0.400681	0.15859	0.527243	0.125659	0.214052	0.175905	0.151784	0.239882	0.236704	0.2992	0.263095	0.169317	0.30273	0.215354	0.330426	0.269583
7094						818.505	245.672	0.0989505	0.28194	0.368658	0.251507	0.213098	0.278344	0.235092	0.341024	0.544418	0.31281	0.463403	0.175114	0.143832	0.335678	0.252688	0.365005	0.21187	0.185858	0.243924	0.817923	0.306057	0.282719	0.316215	0.531287	0.145242	0.263815	0.231452	0.246994	0.348806	0.219701	0.266516	0.337298	0.271008	0.353071	0.248694	0.185622	0.551273	0.442274	0.35504	0.148853	0.239928	0.29929
7059						816.505	218.677	0.0433406	0.153352	0.0377522	0.147072	0.142402	0.113814	0.0524504	0.144373	0.0988213	0.02178	0.158544	0.0527907	0.0962704	0.0650841	0.0963615	0.141659	0.0630287	0.0778526	0.0293803	0.133557	0.0934843	0.115318	0.0928708	0.0938083	0.0575204	0.147639	0.0861831	0.0549471	0.224071	0.0319862	0.0793027	0.0640496	0.0755659	0.0938956	0.109755	0.0860747	0.075335	0.0156376	0.0876484	0.0337124	0.0642095	0.0844765
11134						1476.1	465.145	0.0959308	0.344309	0.209294	0.302174	0.239081	0.228694	0.249761	0.253471	0.219478	0.234558	0.301584	0.171762	0.272506	0.291959	0.286545	0.34303	0.222803	0.193645	0.276156	0.344653	0.25407	0.324282	0.277725	0.198137	0.29264	0.193424	0.306964	0.262385	0.295815	0.185923	0.238365	0.283332	0.217159	0.302593	0.263299	0.226471	0.296062	0.356363	0.271132	0.150226	0.330073	0.263618
7457						842.556	324.565	0.144282	0.559597	0.141017	0.504833	0.386741	0.397851	0.229705	0.695989	0.39492	0.097176	0.402022	0.175287	0.387955	0.30386	0.478625	0.386189	0.282896	0.207543	0.101405	0.45232	0.336511	0.413418	0.357501	0.255543	0.295619	0.399465	0.423977	0.107217	0.825168	0.0969906	0.277406	0.148401	0.268878	0.251184	0.358214	0.267089	0.224559	0.172693	0.266898	0.244132	0.278649	0.29665
6313						762.503	353.149	0.0355481	0.180298	0.0556061	0.0929964	0.0885155	0.2771	0.0879621	0.15695	0.117968	0.0444255	0.160514	0.0758572	0.312386	0.115021	0.118802	0.130366	0.243698	0.214524	0.0716297	0.150724	0.136544	0.137388	0.114129	0.106687	0.1481	0.106186	0.257895	0.0892111	0.171548	0.0440562	0.0821577	0.106174	0.0779253	0.117999	0.149486	0.114155	0.0854427	0.0725476	0.144669	0.0480478	0.117256	0.114553
3800						566.346	129.276	0.0311619	0.0914867	0.0227319	0.0896206	0.104138	0.0775486	0.0300315	0.101428	0.0734624	0.0141208	0.0971418	0.0286865	0.093086	0.067118	0.0870924	0.0779133	0.109113	0.0733786	0.0233251	0.0969415	0.0694763	0.0760683	0.0672291	0.0551382	0.0440254	0.0832368	0.0680767	0.0495941	0.11272	0.0323213	0.0724404	0.0481507	0.0410753	0.0721808	0.0904055	0.0581565	0.0614068	0.0206434	0.128803	0.0348795	0.0874169	0.0651984
7426						840.577	442.257	0.572604	1.56833	1.58711	1.74643	2.15167	3.22078	1.57992	2.19647	2.73236	2.37114	1.98209	1.53782	1.24775	1.65643	1.35984	2.90881	1.50012	1.19425	1.62236	1.82673	1.82815	3.20271	1.84439	2.67069	1.47781	2.57631	1.64531	1.34847	1.70883	2.20338	1.77027	1.67626	1.76976	2.31451	1.8258	1.32587	2.94877	1.59013	1.69691	1.06577	1.30724	1.89846
7453						842.516	232.843	0.0300443	0.108184	0.00416363	0.0395455	0.0675537	0.043451	0.0218302	0.0648322	0.0149785	0.00763428	0.256701	0.00951146	0.0399947	0.0457417	0.0549385	0.10594	0.00764865	0.0187966	0.013262	0.0579653	0.0506358	0.124488	0.0621731	0.0248684	0.0346818	0.0512112	0.0752872	0.0225817	0.0909308	0.0148804	0.0191624	0.0114016	0.028777	0.0196913	0.0500966	0.0513147	0.0462209	0.0220295	0.0511062	0.0232628	0.0490602	0.0436613
5674						721.501	352.964	0.0716323	0.631845	0.259192	0.308918	0.276064	0.358377	0.458146	0.494219	0.620422	0.394702	0.496351	0.185959	0.342818	0.423148	0.457534	0.44131	0.39442	0.280559	0.272664	0.683364	0.392582	0.443909	0.358977	0.296228	0.331678	0.387727	0.4406	0.585148	0.569747	0.286835	0.3553	0.391098	0.345907	0.607578	0.547835	0.265503	0.458576	0.460697	0.46275	0.114362	0.294272	0.400236
7604						852.573	419.533	7.615	19.8157	19.2551	15.9929	15.3146	18.8814	20.5002	21.1516	30.3289	16.8737	21.3393	18.2823	28.1475	20.3632	17.7811	18.0584	16.0749	14.065	18.226	32.9172	19.5492	16.8557	26.9902	19.8175	14.9584	20.724	16.171	21.3966	18.7558	20.9552	20.1776	21.9797	27.4996	26.5182	20.3973	15.3584	23.0359	18.9364	17.0755	11.5776	25.8777	20.2529
6358						766.587	504.955	0.395937	2.06994	1.17566	1.64465	1.81986	1.53639	2.14127	1.73584	1.55894	1.79735	2.32875	1.25466	1.43611	2.03496	2.07666	1.71768	1.58393	1.88035	1.74561	2.31924	1.71269	2.20593	1.59949	2.72332	1.55583	1.3896	1.27444	2.01204	2.44481	1.31299	2.27176	1.42356	1.64248	1.91896	1.72648	1.65293	2.9322	2.4425	2.37155	0.77709	2.00006	1.8839
7458						842.556	274.844	0.154614	0.482436	0.0639327	0.442437	0.338856	0.389543	0.1355	0.398133	0.197234	0.054211	0.375248	0.118768	0.243375	0.153204	0.267119	0.334513	0.190316	0.183809	0.0643665	0.327156	0.245739	0.248406	0.291683	0.278013	0.209684	0.345559	0.257966	0.116055	0.507178	0.12392	0.174487	0.146186	0.251201	0.260982	0.274394	0.256585	0.16675	0.0534512	0.211507	0.124842	0.193718	0.224628
6521						778.576	511.792	3.81888	9.78879	11.0998	14.2204	8.28588	21.875	16.0246	14.7458	26.5824	14.4066	18.2579	12.9629	13.3627	15.1908	10.6074	14.9967	14.4616	11.2948	14.6053	20.565	14.3577	16.7653	11.0092	13.606	9.99057	13.8064	8.10493	13.3065	15.6578	15.177	16.2519	12.5723	14.5557	19.6938	10.1	9.72325	19.4421	15.1721	12.2633	9.34376	7.46096	13.2001
7425						840.564	428.099	0.144828	0.302995	0.322196	0.174687	0.10962	0.242141	0.340741	0.28497	0.481956	0.403982	0.351549	0.292734	0.255829	0.315831	0.276073	0.197838	0.347104	0.264709	0.345164	0.377716	0.291633	0.291988	0.297818	0.281811	0.228359	0.222014	0.22596	0.28794	0.207523	0.29711	0.40984	0.343875	0.255461	0.403502	0.410325	0.230555	0.338101	0.288959	0.413892	0.220707	0.338426	0.299708
7437						840.531	380.061	0.030422	0.0688345	0.0941387	0.0726781	0.06857	0.0905981	0.112315	0.101849	0.130345	0.108391	0.0983138	0.0695141	0.0548574	0.105987	0.0727318	0.0903547	0.0684061	0.0486123	0.0740438	0.115657	0.0838309	0.0860309	0.103002	0.0967318	0.0678105	0.0701242	0.0807655	0.102685	0.103103	0.0961447	0.0925949	0.102103	0.0928842	0.0913658	0.0870999	0.0636967	0.127773	0.109088	0.0841719	0.0443118	0.0848024	0.0893145
7575						850.558	379.656	7.51116	20.577	21.2972	19.7779	17.3404	23.4398	27.9449	25.4523	31.5964	28.5739	25.0511	16.3798	17.5257	29.276	17.4934	23.7954	16.6021	13.6967	22.6778	29.5278	21.7769	23.9258	24.6319	27.8843	18.1924	17.5435	21.2362	25.9092	23.4237	24.5585	22.0715	25.7954	25.5045	26.6001	25.7797	18.2628	33.2581	32.4279	20.8613	10.2345	19.4686	23.3785
6130						750.543	469.966	6.10902	24.7595	23.5373	26.5306	17.9204	26.7265	31.4078	26.2022	37.2091	27.1119	31.7241	22.2985	22.487	28.5357	26.6212	24.1678	26.8974	23.5843	27.843	34.2955	25.7984	30.4643	21.2991	25.4876	20.5132	24.5525	15.2081	30.2656	32.5462	26.8058	34.4404	23.4683	28.5628	32.6615	21.506	18.3649	36.5302	32.6521	22.1869	15.2343	20.3931	25.6571
6132						750.534	454.538	0.732948	2.26211	2.12095	2.45177	2.26814	2.43818	3.52655	2.39332	2.93856	2.85326	3.12484	1.62675	2.66449	3.3285	2.84471	2.58625	2.60326	2.66253	3.02537	3.53194	2.59922	3.3202	2.24093	2.63723	2.0862	2.26429	1.85189	2.78227	2.87663	3.03058	2.91536	2.15994	2.72228	2.88848	3.04128	2.02691	3.82808	3.5443	2.90535	1.38528	2.44872	2.64781
3799						566.346	101.84	0.138475	0.834866	0.535589	0.477507	0.3399	0.793429	0.68411	1.1676	1.25608	0.815774	1.29544	0.443667	0.970943	1.19352	1.01051	1.9011	0.750591	0.683035	0.907481	1.84392	0.902177	0.784249	0.420379	0.712632	0.396875	0.81736	0.552915	0.873352	0.767907	0.731949	1.19667	0.831032	0.893908	1.0637	1.28107	0.508195	2.25307	0.729781	1.14068	0.225203	0.69877	0.843985
2890						478.293	96.4411	0.851831	2.63085	1.11055	1.83629	2.13189	2.01119	1.42815	2.94767	2.31687	1.21611	3.54271	1.25504	2.07138	2.36342	2.60803	3.61041	1.66637	1.53858	1.76689	4.02972	2.1467	2.39126	1.73942	1.86711	1.8063	2.05817	1.94485	1.7032	2.66436	1.22356	2.08427	1.44739	1.33279	2.63874	2.23248	1.87838	3.3763	1.56159	2.38818	0.698173	2.31981	1.96782
8077						882.624	503.225	1.56085	2.33211	2.91597	2.24811	2.26366	2.61804	1.40963	1.90135	1.67167	2.58038	2.10879	2.04537	2.53435	2.66549	1.90371	1.16887	2.24931	2.23558	3.12696	1.18955	2.13649	2.83326	1.74943	2.14262	1.53704	2.10095	1.76569	2.77777	1.74611	3.27642	1.74786	1.3087	2.29931	2.11022	2.49744	1.88885	1.7123	1.63823	1.86321	1.94357	1.09136	2.00152
3813						568.362	138.209	0.494578	1.82127	1.29708	1.48639	1.29166	1.9283	1.98265	2.76321	2.88314	2.21787	4.06725	1.20724	1.97463	2.98304	2.2744	3.58758	2.43781	1.69612	2.25882	4.04761	2.23503	2.08021	1.22216	1.89757	1.04082	2.2882	1.29773	2.11521	2.43399	1.79749	2.0546	1.89173	2.14334	1.93006	2.898	1.61844	5.24649	1.91176	3.45374	0.665361	1.61994	2.08034
6400						769.503	292.701	0.128547	0.458963	0.391681	0.484882	0.439695	0.420815	0.390405	0.577024	0.817236	0.737376	0.630434	0.543001	0.419327	0.789667	0.478781	0.662519	0.40974	0.343351	0.550542	0.903901	0.528894	0.574249	0.414128	0.39678	0.312532	0.621075	0.483138	0.511707	0.438644	0.543412	0.492612	0.457836	0.318168	0.642017	0.388761	0.36578	0.69456	0.723376	0.792111	0.371639	0.650161	0.509634
6398						769.503	263.532	0.187601	0.694648	0.616698	1.27465	0.548585	0.625474	0.491987	0.429466	0.422643	0.720379	0.833627	0.110665	0.238009	0.41641	0.491365	0.611164	0.30319	0.406366	0.48971	1.06888	0.549076	0.724968	0.504776	0.510837	0.2174	0.371777	0.355196	0.378192	0.763088	0.444721	0.482537	0.395917	0.422104	0.475436	0.42458	0.283271	0.846784	0.929288	0.404921	0.205098	0.307777	0.472433
3056						502.293	83.7971	0.0956024	0.566612	0.153912	0.333966	0.356336	0.533396	0.335487	0.510647	0.375015	0.244592	0.655199	0.167346	0.831156	0.649848	0.420949	0.378688	0.286011	0.289092	0.257962	0.644	0.404291	0.40921	0.352823	0.331977	0.323877	0.413967	0.321352	0.415812	0.627058	0.226558	0.347636	0.311721	0.434415	0.37297	0.735911	0.369914	0.600377	0.555191	0.589363	0.125501	0.368024	0.411683
4207						599.508	431.775	0.0804267	0.141031	0.0892011	0.10408	0.0495152	0.101213	0.0572752	0.132708	0.096498	0.103614	0.109337	0.0725003	0.0885086	0.12624	0.132686	0.0916983	0.0852904	0.073114	0.0961943	0.115741	0.0973436	0.0585189	0.0629795	0.0461367	0.108495	0.174837	0.0761139	0.0877978	0.0789927	0.094167	0.083392	0.0646918	0.0772742	0.121941	0.0548901	0.0623448	0.0704187	0.0628326	0.100811	0.0694455	0.0883402	0.082221
6067						746.505	391.39	0.0031203	0.811986	0.0370665	0.0455173	0.0386448	0.0530346	0.099281	0.0426733	0.115457	0.0914027	0.0589595	0.0398099	0.0417345	0.165203	0.0722414	0.0717928	0.0590891	0.0371146	0.0872762	0.101134	0.103627	0.142008	0.0447572	0.0818422	0.0620875	0.0468107	0.0462447	0.12231	0.0794014	0.0695938	0.0850405	0.0735578	0.0566587	0.0921752	0.0951682	0.060081	0.178913	0.117405	0.102136	0.0185992	0.0603418	0.0817566
3111						509.289	69.4688	0.00752657	0.260015	0.0802911	0.2393	0.180644	0.127136	0.12881	0.1417	0.319126	0.204838	0.317743	0.0780167	0.12152	0.216398	0.155453	0.231639	0.100226	0.108988	0.1333	0.294701	0.172369	0.271925	0.132714	0.297663	0.107136	0.201939	0.123667	0.218077	0.268237	0.106936	0.282879	0.147784	0.0870849	0.197159	0.115999	0.0968047	0.317343	0.240955	0.216702	0.0273719	0.0936012	0.177599
6334						764.522	418.264	6.4997	19.8718	18.8003	22.9075	16.5965	21.5769	19.9949	21.5159	30.0359	20.8188	21.6788	16.2802	17.0002	21.9838	19.8495	28.627	16.0758	12.9375	23.4325	29.473	20.2978	19.689	18.1085	17.6167	17.9432	18.6776	17.7613	22.2764	18.9218	20.2309	21.3459	22.6707	7.1743	29.9838	17.1465	17.1399	28.1063	27.8767	16.6265	10.9234	18.4001	19.431
4076						590.347	108.035	0.0137597	0.0793463	0.0128534	0.0358959	0.0394347	0.0303762	0.0252523	0.0798412	0.0124447	0.0156964	0.0930636	0.0240917	0.0486474	0.0546122	0.0700968	0.0608375	0.0361651	0.0351533	0.0200499	0.0592462	0.0423432	0.0464625	0.0416228	0.0374713	0.0279429	0.0527384	0.0403252	0.0362114	0.0709724	0.0166499	0.0516003	0.0322565	0.032579	0.0519396	0.0252779	0.048072	0.0468968	0.0223734	0.0607938	0.0144638	0.0420528	0.0399351
6066						746.514	403.887	0.864251	2.31578	2.68517	3.12076	1.93515	2.34422	3.36205	2.44683	2.79825	3.88149	3.84742	1.55502	1.72948	3.81489	2.59417	2.21552	1.63097	2.10584	2.9967	4.28504	2.62645	3.15072	1.93152	2.25437	1.42592	1.96617	2.22573	2.54932	2.22443	2.4036	3.20053	2.4403	2.34718	3.412	3.47645	1.58082	4.60862	4.61209	3.11116	1.48371	2.03266	2.62187
2891						478.293	120.972	0.037647	0.200361	0.0534735	0.105506	0.0266929	0.104898	0.0138732	0.151954	0.0981817	0.0658152	0.21104	0.0684316	0.0168752	0.111257	0.136064	0.198983	0.0879029	0.0843704	0.0703938	0.168177	0.100595	0.119331	0.0683526	0.0770904	0.0808519	0.102596	0.0927883	0.0741059	0.0246725	0.0499614	0.0947447	0.0665987	0.0580592	0.107248	0.140406	0.0831062	0.158726	0.0821725	0.128299	0.0357155	0.0995057	0.0872166
7542						848.55	308.542	0.00159358	0.0164971	0.0254916	0.0190736	0.0232661	0.014623	0.0305311	0.0193562	0.0248503	0.0218009	0.01593	0.0148553	0.0225384	0.0260242	0.0214165	0.0067565	0.0188901	0.0189601	0.0159198	0.0525264	0.020545	0.0112453	0.0190008	0.0204994	0.0185989	0.0190632	0.00371447	0.0313046	0.021001	0.0197418	0.0108496	0.0173033	0.0462125	0.0330856	0.0190629	0.00564435	0.0194553	0.0233693	0.0123383	0.00537176	0.0121785	0.018452
7214						826.558	413.917	38.9539	106.559	97.58	97.8096	106.649	127.384	107.962	106.28	155.766	118.429	116.798	100.88	92.3465	117.53	88.0282	105.146	103.518	94.2141	97.4574	136.413	105.785	103.887	99.6455	117.865	98.3787	101.188	90.4407	108.58	130.816	108.314	111.733	119.032	102.252	135.47	91.4011	93.6138	114.542	119.011	92.2498	70.8449	92.8536	105.106
2876						476.278	78.0497	0.253108	0.877023	0.357391	0.796738	0.715235	0.856662	0.777075	0.989236	0.754466	0.743457	1.59909	0.262923	0.665807	1.17563	0.899702	1.3876	0.547089	0.534267	0.658471	1.35542	0.810319	1.06101	0.668199	0.666381	0.472415	0.63793	0.705536	0.732692	1.29711	0.463208	0.865191	0.672658	0.705119	0.842129	1.03474	0.712229	1.7587	0.877944	0.489232	0.263177	0.703061	0.781433
3784						564.329	80.1821	0.130551	0.6691	0.428828	0.515068	0.432714	0.769102	0.879189	1.05522	1.21781	1.13193	1.93753	0.307957	0.715672	1.38901	0.989426	2.03232	0.633814	0.552846	0.935187	1.73552	0.922941	0.850895	0.50765	0.571448	0.249335	0.588209	0.500242	1.24311	1.1682	0.740025	1.21552	0.84052	0.917937	0.899776	1.30697	0.701312	2.7224	1.14273	1.34638	0.211445	0.735668	0.922989
3839						571.287	50.6098	0.00907667	0.00215807	0.068212	0.105261	0.0718377	0.100906	0.0974376	0.108765	0.142646	0.099258	0.146292	0.0503531	0.0980514	0.149105	0.112828	0.243201	0.072988	0.051006	0.104696	0.200362	0.101722	0.123952	0.0710232	0.100759	0.0505016	0.139864	0.0632449	0.128235	0.133668	0.0969949	0.154145	0.118854	0.0608313	0.203948	0.122484	0.0767959	0.243633	0.149234	0.108958	0.0290749	0.0798416	0.112802
6395						769.486	240.859	0.00594074	0.0435768	0.00304848	0.0259553	0.0315008	0.0107182	0.00226922	0.0413181	0.00251024	0.00134943	0.0315872	0.00329183	0.0353083	0.0089124	0.0390239	0.0188808	0.00992958	0.0144135	0.00215704	0.0195786	0.0175635	0.0189757	0.017721	0.0199677	0.00950053	0.0598311	0.014337	0.0051956	0.0482052	0.00115819	0.0178441	0.00727294	0.00767504	0.0167882	0.0227579	0.0135166	0.00674374	0.00262172	0.010874	0.00173125	0.0184808	0.0160599
7950						874.554	345.337	0.00751273	0.0667678	0.0502502	0.0454683	0.0645791	0.0313853	0.0701435	0.0511661	0.0711454	0.0454247	0.0288992	0.0260638	0.0624152	0.0958985	0.0450476	0.0841255	0.048256	0.0230878	0.0590289	0.0644053	0.0520536	0.0860122	0.0347906	0.0532568	0.0605147	0.061794	0.0451373	0.0618053	0.0578786	0.0616621	0.0499996	0.0679942	0.0688386	0.0937882	0.0948702	0.058722	0.108113	0.0831935	0.0685583	0.0198755	0.0498886	0.0643346
7947						874.545	327.861	0.00958611	0.0405515	0.0282803	0.0240917	0.029818	0.0408784	0.0396674	0.0493279	0.110112	0.0390572	0.0458421	0.0397541	0.0224217	0.054286	0.0290082	0.0794692	0.0208391	0.0286139	0.0337029	0.0536057	0.0409457	0.0481272	0.0354229	0.0687673	0.0219579	0.0439013	0.0376962	0.0550492	0.042389	0.0343976	0.0350134	0.0733089	0.0308865	0.0837578	0.0415995	0.0386207	0.0666413	0.0455673	0.0370927	0.0150857	0.0494788	0.0452381
7605						852.566	379.532	1.15545	3.14909	3.29182	3.23377	2.79842	3.67719	4.33659	4.01683	5.84398	4.50367	5.97807	2.53049	2.87617	4.50161	2.64925	3.87824	2.80632	2.20631	3.62195	4.86747	3.59613	3.90851	3.8805	6.12824	2.96912	2.83308	3.33753	4.15852	3.62736	3.9691	3.46645	4.0802	4.03572	7.23355	4.12364	2.79535	5.56093	5.09453	3.32793	1.70265	3.01159	3.96222
7155						822.6	539.877	0.130443	0.720258	0.474512	0.681953	0.50285	1.28674	0.775587	0.520222	0.724215	0.784644	1.08205	0.522306	0.462536	0.92318	0.70739	1.01472	0.681527	0.53857	0.587593	0.847838	0.698456	0.879958	0.656864	0.776654	0.561762	0.566819	0.481384	0.844983	0.914452	0.636148	0.807574	0.799513	0.760233	0.893682	0.549615	0.631647	1.45836	1.1163	0.607551	0.399845	0.474446	0.74089
7154						822.577	522.083	0.443184	0.862488	0.942722	1.00553	0.76819	1.02211	0.994885	1.26234	0.740444	1.27973	1.29327	0.66003	0.932379	0.914932	0.781954	0.853445	1.34805	0.635081	1.49121	1.28577	0.975888	1.52903	0.427808	0.636095	0.8415	0.75344	0.583428	1.16756	1.23729	1.19567	1.02982	1.1254	1.05659	1.17423	0.859398	0.859263	1.61361	1.1838	0.981331	0.470482	0.859819	0.979278
2908						480.308	133.254	0.895039	3.0329	2.31618	2.20061	2.18413	3.34148	3.17394	4.63084	3.46418	3.37516	4.65003	1.84397	3.38871	4.23285	4.63728	5.27057	3.78012	2.21173	3.92502	7.90179	3.52283	2.76346	2.25521	2.78193	2.44576	3.12657	2.23192	2.57262	3.14626	2.51881	3.0896	2.60468	3.54058	2.92648	3.82177	1.93723	6.58969	3.26017	4.64921	0.90292	3.42321	3.0294
7429						840.572	536.278	0.10306	0.371631	0.361775	0.330806	0.243851	0.377208	0.262412	0.336083	0.444011	0.328493	0.377511	0.323314	0.198337	0.364561	0.320514	0.311254	0.316639	0.208618	0.270804	0.439247	0.314506	0.365943	0.25013	0.289381	0.320462	0.292557	0.329762	0.384589	0.375894	0.337932	0.299154	0.282608	0.250569	0.628823	0.348404	0.278153	0.411472	0.361654	0.284552	0.134745	0.326978	0.327688
6386						768.544	459.703	4.156	11.3278	9.73985	11.5567	10.9892	13.8751	12.5756	10.9085	15.4088	12.8996	13.1423	8.7042	8.29554	12.829	10.538	10.8192	10.5285	8.7829	10.9854	14.97	11.1516	11.108	10.4752	11.7082	9.36737	9.86594	10.489	11.5381	13.1986	12.642	11.9208	12.4579	10.8541	14.6437	10.8141	9.63453	14.7906	14.6298	10.1693	6.339	10.3438	11.3495
8472						911.527	328.416	0.00022628	0.00614311	0.00251541	0.00710428	0.173805	0.00265015	0.0110163	0.00409248	0.00271836	0.00623769	0.0097357	0.00116949	0.182531	0.00359957	0.00247741	0.00222517	0.244753	0.00240418	0.0039385	0.00945448	0.0339399	0.005696	0.00401988	0.0119837	0.206957	0.0031401	0.00363502	0.00675565	0.0149496	0.0068299	0.00458047	0.00686271	0.231629	0.00869031	0.0102555	0.00152478	0.0154411	0.0117516	0.00446017	3.41083e-05	0.00440772	0.0281802
5540						712.493	375.73	0.158598	0.786838	0.250605	0.611395	0.342913	0.388609	0.470917	0.511574	0.552246	0.410133	0.658762	0.209409	0.637535	0.725297	0.482786	0.951833	0.319646	0.280879	0.628703	0.663891	0.502128	0.643305	0.407759	0.353941	0.633716	0.393985	0.431486	0.512367	0.699347	0.364052	0.400521	0.632552	0.312819	0.596711	0.410563	0.431987	0.674854	0.650476	0.582255	0.263376	0.486459	0.494127
7237						828.573	439.012	17.65	40.2828	31.8264	28.5978	45.4272	35.4908	46.2061	39.8533	49.1699	46.8486	30.3025	32.3881	52.0839	50.5475	44.1172	52.3958	44.2775	38.6372	28.918	54.7872	40.4904	61.4231	42.3422	40.9051	68.3687	46.432	44.5617	53.6598	58.9192	43.7066	42.4625	45.8037	39.1617	50.7177	50.3615	49.8371	35.5441	69.6566	56.0572	32.245	54.4216	49.3294
6752						795.516	278.631	0.0571072	0.147688	0.286712	0.367897	0.195419	0.154491	0.254404	0.225678	0.264055	0.228978	0.315004	0.114679	0.216918	0.274158	0.178445	0.208602	0.161583	0.203837	0.219661	0.506646	0.229098	0.213917	0.22457	0.232973	0.141152	0.192883	0.116314	0.240703	0.269945	0.195398	0.179069	0.209467	0.321439	0.227007	0.277315	0.120302	0.344735	0.316638	0.223067	0.107214	0.154408	0.215426
6996						812.571	439.991	0.387514	1.07478	0.937942	0.614795	0.755938	0.826437	1.34384	1.11366	1.60645	1.10478	1.31103	1.08285	0.88465	1.03599	1.00741	0.811181	0.890805	1.10234	1.07131	1.13764	1.00507	1.23792	0.820931	1.204	0.672999	0.950017	0.691495	1.05934	0.872854	1.00336	1.31356	0.869689	0.989932	1.3471	1.1217	0.645226	1.29028	0.823844	1.24981	0.672029	0.995817	0.991595
7025						814.589	453.21	0.330232	0.890338	0.648337	0.733547	0.995646	0.942241	1.18787	0.898714	1.1152	1.10108	1.22917	0.716501	0.824806	1.05803	0.891163	0.785787	0.843092	0.965078	0.951237	1.05198	0.908003	0.948599	0.903015	1.7081	0.62899	0.92512	0.656972	0.994327	1.1303	0.866923	1.07519	0.708837	0.882374	1.20373	0.894909	0.847034	1.46554	1.27094	1.28849	0.493529	0.913343	0.990312
5923						736.492	379.057	0.0640347	0.32862	0.150701	0.177905	0.275883	0.234824	0.251246	0.288237	0.554965	0.218625	0.273225	0.287257	0.233463	0.412855	0.282644	0.388235	0.212142	0.201634	0.242016	0.339702	0.270911	0.398221	0.212663	0.364431	0.217863	0.101261	0.213436	0.369191	0.333257	0.184986	0.180614	0.465228	0.203702	0.31359	0.229371	0.205548	0.323263	0.424318	0.346406	0.120925	0.346954	0.277761
5922						736.493	367.808	0.161457	0.842011	0.391291	1.22611	0.403288	0.527599	0.550553	1.45455	0.827807	0.436565	0.66744	0.374716	0.660237	0.670883	0.546986	1.00115	0.457582	0.399853	0.676726	0.893868	0.658534	0.651744	0.461411	0.428493	0.793123	0.540085	0.513758	0.669682	0.767815	0.515403	0.592016	0.835777	0.377521	1.02531	1.08146	0.512072	0.691202	0.687124	0.589039	0.345613	0.503015	0.629083
5917						736.492	351.384	0.12523	0.427796	0.181749	0.322093	0.289482	0.269632	0.238418	0.426862	0.324766	0.303937	0.359027	0.124355	0.279581	0.393514	0.336047	0.418298	0.206384	0.207895	0.257974	0.408543	0.295079	0.290417	0.392689	0.217031	0.268274	0.251354	0.242062	0.244509	0.471436	0.219687	0.199311	0.240568	0.222562	0.270896	0.363905	0.268911	0.382931	0.34548	0.295335	0.116095	0.267177	0.278531
7298						832.597	478.618	3.62318	6.85334	4.84438	7.31853	6.074	6.46843	6.11722	5.13383	5.79805	7.31829	9.21359	4.63405	4.55161	8.00367	5.13195	7.20906	6.09813	5.58754	5.65785	6.20861	6.09226	9.99982	4.97676	5.78322	5.46166	5.88719	7.06445	5.33946	7.70812	6.77356	5.71368	5.48696	4.69686	5.91372	5.65414	6.38027	8.84515	9.06778	8.06939	5.00308	6.33233	6.50788
2907						480.323	158.552	0.0094954	0.0718704	0.0505452	0.048387	0.0409639	0.04402	0.0358897	0.0728561	0.0363494	0.0794712	0.0922841	0.0215569	0.0549522	0.0516547	0.0617492	0.0214826	0.00951853	0.0319613	0.0291842	0.0841212	0.0474157	0.0312114	0.0313337	0.0386117	0.0860479	0.0329361	0.0135592	0.0403522	0.0718016	0.0447854	0.0555749	0.0313615	0.0300568	0.058604	0.0552514	0.0319873	0.0416234	0.0660395	0.0346092	0.0191954	0.0280538	0.0421498
8474						911.564	369.38	0.0542856	0.218476	0.228196	0.346058	0.223402	0.312899	0.558237	0.216039	0.47128	0.00475304	0.233772	0.123081	0.275717	0.54283	0.280307	0.395898	0.349618	0.225587	0.279617	0.597777	0.296891	0.47423	0.24164	0.311384	0.202298	0.288553	0.479864	0.516859	0.398081	0.522597	0.554954	0.279057	0.297787	0.430091	0.359263	0.407998	0.715248	1.73317	0.321421	0.154348	0.212186	0.445051
7544						848.543	375.616	0.00533556	0.0914795	0.0426217	0.0263334	0.0564099	0.0498301	0.0510125	0.0420737	0.0716603	0.0722784	0.0645132	0.0553931	0.0317717	0.0584642	0.0802298	0.0187703	0.0549102	0.0305703	0.075655	0.0826776	0.0530995	0.0511188	0.0848308	0.0589983	0.0160924	0.00813046	0.0381244	0.0799382	0.0257177	0.0795273	0.0287238	0.0512747	0.0376194	0.119364	0.0671862	0.0696309	0.0428613	0.0795039	0.0599238	0.0175009	0.0323415	0.0524204
5982						740.515	412.4	0.961552	3.60351	3.57378	3.70785	3.59194	5.22476	4.52128	4.33025	5.48147	4.48055	3.92928	3.17043	3.34759	4.79263	3.53822	4.13947	4.03477	3.05248	4.21033	6.65018	4.01712	3.78888	3.83809	3.90956	3.59883	3.31578	3.16173	4.22374	4.65919	4.20491	4.39503	4.72931	3.64541	5.62802	3.19114	3.03155	5.27806	5.52315	3.43556	2.10572	3.56731	3.96155
5159						684.612	555.403	0.341188	0.915408	0.429958	0.708208	0.638047	0.817942	0.820798	0.924653	1.37735	1.12719	1.70672	0.677965	1.04865	1.46878	0.814656	1.0599	1.09417	0.71957	0.752908	1.16074	0.93024	0.931875	1.03053	1.12265	0.736238	0.975338	0.820527	0.843596	1.22782	0.932695	0.921553	0.9594	0.706288	1.04757	0.749888	0.850825	1.19312	1.29785	1.31742	0.428315	0.86518	0.947934
7686						858.551	272.265	0.181352	0.741838	0.0456855	0.583837	0.445556	0.458595	0.0934397	0.57712	0.250382	0.0276214	0.500746	0.166548	0.375289	0.156429	0.420992	0.445881	0.356973	0.268262	0.0569676	0.447935	0.330072	0.291099	0.471431	0.340418	0.293506	0.415888	0.311513	0.0626059	0.663614	0.0502349	0.137639	0.124762	0.312601	0.181314	0.277872	0.298146	0.0980977	0.476986	0.159763	0.174074	0.264332	0.270295
8092						883.527	289.757	0.0540598	0.555631	0.325506	0.449443	0.223239	0.439303	0.61789	0.339088	0.720818	0.592246	0.448716	0.203859	0.300178	0.630215	0.328977	0.631055	0.355409	0.183429	0.404675	0.607542	0.420564	0.385734	0.351524	0.500735	0.448503	0.327879	0.4334	0.849933	0.486833	0.587096	0.519894	0.847906	0.40076	1.10867	0.680569	0.507967	1.15122	1.27321	0.419708	0.11308	0.277363	0.583599
8486						913.581	382.181	0.128667	0.565827	0.641651	0.719231	0.519242	0.848901	0.929416	0.56822	0.982814	0.850732	0.505552	0.438859	0.393464	1.06281	0.549441	0.624848	0.61832	0.41805	0.699644	0.87086	0.646827	1.03598	0.456665	0.780889	0.641913	0.809396	0.742415	1.06298	0.904334	1.08572	0.951525	0.830387	0.626822	1.16638	0.539842	0.781431	1.26755	1.55156	0.624718	0.347079	0.522856	0.836522
8065						881.519	269.492	0.148289	0.869042	0.813478	1.04764	0.469908	1.13397	1.13952	0.66936	1.4896	1.0955	1.15514	0.584584	0.443063	1.26676	0.579176	1.28699	0.543373	0.328445	0.777765	1.15778	0.84997	0.987106	0.753051	0.814735	0.961899	0.682695	0.770639	1.65993	1.04967	1.27893	0.981713	1.73733	1.03435	2.2278	1.09327	0.896547	2.74829	2.56504	0.585354	0.357454	0.51393	1.18499
7681						858.612	491.591	0.718331	2.45224	1.21833	2.37149	1.83601	1.21192	2.36241	1.8347	2.82173	2.28554	2.57399	1.4205	2.38493	4.31476	1.97101	1.97352	2.29939	1.99757	1.6147	1.97161	2.08173	3.11257	1.542	2.20201	2.5241	2.37103	2.35943	2.60356	2.84746	2.33068	1.8215	2.19559	2.12948	2.2301	2.93421	2.57027	3.00027	3.23038	3.35674	1.58083	2.17017	2.45562
4198						599.182	116.935	0.000545354	0.00874037	0.00924709	0.00300144	0.00285914	0.00689277	0.0214809	0.000904399	0.0326672	0.0279427	0.0438176	0.0242976	0.022338	0.0191483	0.02219	0.0181303	0.0205953	0.0117283	0.00694363	0.0270781	0.0165274	0.0103558	0.0100588	0.00878763	0.0119603	0.0142978	0.0138533	0.00632724	0.0079298	0.00825245	0.0138711	0.0124342	0.00802824	0.0282074	0.0157199	0.0059088	0.028623	0.0278609	0.031118	0.00743155	0.0124385	0.0141732
7221						826.559	472.784	0.149013	0.219948	0.396527	0.386953	0.350775	0.524888	0.4394	0.459664	0.438687	0.432847	0.435034	0.420232	0.336689	0.408065	0.188089	0.26641	0.413961	0.41863	0.35834	0.606926	0.382554	0.441682	0.396098	0.107154	0.405801	0.472406	0.35584	0.447078	0.563408	0.430115	0.352138	0.448761	0.294279	0.502349	0.361355	0.321836	0.409935	0.415693	0.0825857	0.289799	0.429109	0.376371
7144						821.535	314.919	0.0390262	0.149714	0.144813	0.236375	0.158499	0.100482	0.142722	0.089795	0.174742	0.147365	0.151654	0.0813543	0.144848	0.11465	0.164479	0.16222	0.156719	0.162821	0.160955	0.306553	0.149489	0.222991	0.0956391	0.100549	0.127551	0.177818	0.100222	0.197894	0.0143696	0.159508	0.163682	0.104868	0.110523	0.141198	0.0958746	0.0858045	0.151277	0.144619	0.104841	0.127733	0.105939	0.126645
7854						869.572	310.646	0.0114626	0.0434319	0.0103005	0.0329892	0.0204881	0.023936	0.00897666	0.0324986	0.0131284	0.00200964	0.0211488	0.00198278	0.00353662	0.0179961	0.00589331	0.0286982	0.0208939	0.0136856	0.00748467	0.0271634	0.0173853	0.0257633	0.0161215	0.0162332	0.00405491	0.026293	0.0136623	0.00540336	0.0339056	0.0268213	0.0115999	0.0174874	0.0223465	0.016437	0.0181161	0.00302942	0.00504681	0.0343451	0.0211229	0.00924952	0.00460194	0.0165821
7138						821.523	279.411	0.0225214	0.0975723	0.0981927	0.099103	0.0802364	0.075424	0.0840314	0.0512028	0.0159217	0.0838715	0.137039	0.0562246	0.0172693	0.0806382	0.112865	0.119398	0.0507198	0.0810653	0.0780503	0.206643	0.0823995	0.116492	0.0439306	0.0380603	0.063936	0.077441	0.0677485	0.0602287	0.0947757	0.0814696	0.0522683	0.0756785	0.10777	0.056205	0.0950154	0.0646216	0.110169	0.104401	0.0902375	0.0212467	0.0737685	0.0747732
6722						793.503	257.247	0.123562	0.253424	0.485544	0.445194	0.261494	0.380731	0.302656	0.32185	0.418747	0.290974	0.474441	0.111117	0.169186	0.236033	0.196558	0.34388	0.192218	0.23125	0.260288	0.710959	0.310505	0.194152	0.259943	0.381418	0.156357	0.280321	0.152147	0.225786	0.289537	0.254189	0.269111	0.261444	0.353748	0.333172	0.241407	0.127874	0.475359	0.266491	0.20099	0.116471	0.135396	0.248766
6503						776.561	498.584	1.27028	2.76187	4.07152	5.79862	3.5197	6.06076	6.38564	4.15592	6.30603	5.47875	5.86034	3.03989	6.71005	5.27493	4.01751	5.95514	6.61236	5.73438	5.96427	8.18329	5.15806	6.28683	3.93386	3.63045	3.14847	3.62491	3.57198	4.83482	4.92923	7.16909	5.77026	3.61253	5.89777	5.90099	4.26621	3.3841	6.33374	5.68897	4.71919	3.5323	2.61872	4.64272
6500						776.561	484.027	2.91619	10.5514	7.49259	9.37088	7.27249	12.4097	11.0466	7.44139	17.0363	8.79102	9.48715	14.1345	8.89478	13.1702	7.70028	12.1112	19.6427	8.97831	8.53972	11.9741	10.4481	17.5699	10.01	10.8925	14.3653	10.297	7.09832	11.4216	9.9196	12.2756	8.63096	13.345	10.7885	12.8127	8.50662	8.72253	23.2447	12.1879	11.5521	5.96031	9.43409	11.4518
5549						712.628	605.967	2.64917	4.99809	3.9671	4.19703	4.36618	4.53258	4.75659	5.35069	5.20522	5.40827	5.72998	4.90536	5.68804	7.80818	5.39006	6.31976	5.06927	4.50398	5.51252	6.05932	5.12087	4.44125	4.97865	4.61864	4.69566	4.97575	4.29698	4.50722	5.34219	4.47359	5.10464	4.924	4.73958	5.38734	5.0333	4.72458	4.83361	5.49647	5.31939	3.61974	5.71779	4.86152
5551						712.637	555.554	0.0659916	0.195931	0.152652	0.158909	0.0932636	0.125669	0.135409	0.238436	0.376603	0.18164	0.27519	0.150548	0.178643	0.231334	0.204927	0.225452	0.133828	0.149617	0.143067	0.290308	0.185371	0.134303	0.157211	0.149647	0.132099	0.173863	0.126872	0.133146	0.151695	0.132041	0.154647	0.150963	0.0948836	0.416096	0.176039	0.0980649	0.167337	0.143827	0.155982	0.0632001	0.222082	0.1567
7188						824.545	379.428	0.404863	1.40728	0.570268	1.17572	0.983436	2.19943	2.94974	1.34623	2.28248	1.00747	0.950674	1.96504	0.973114	1.22615	0.942339	1.66409	0.710068	1.11226	1.02248	2.48774	1.36904	1.88844	0.791366	1.58938	0.982241	1.22987	0.965844	1.24093	2.46936	2.21033	2.26691	1.26867	2.36376	3.4488	0.837863	0.911216	3.05867	2.30538	1.58111	0.70218	1.41368	1.6763
7436						840.608	479.174	0.0585056	0.203606	0.144351	0.125822	0.0330773	0.116607	0.208609	0.157396	0.188839	0.221717	0.227517	0.0316168	0.187358	0.252221	0.174389	0.135731	0.159709	0.186538	0.151603	0.192024	0.157862	0.211527	0.164102	0.187168	0.138373	0.144737	0.141619	0.184047	0.19706	0.164638	0.175561	0.123382	0.170735	0.193411	0.240778	0.148508	0.259191	0.268813	0.304203	0.100059	0.235492	0.18767
7342						834.631	572.397	0.250705	0.447741	0.321	0.499222	0.666566	0.456002	0.439598	0.428004	0.551217	0.265488	0.675525	0.377794	0.502939	0.7281	0.615272	0.451996	0.533457	0.483165	0.126825	0.237004	0.452881	0.956988	0.772794	0.489161	0.585231	0.365056	0.338146	0.676266	0.407835	0.630091	0.727379	0.393563	0.204124	0.439923	0.544637	0.167275	0.802957	1.06971	0.529081	0.400611	0.441984	0.547141
7347						834.668	552.875	0.667241	2.11692	1.28083	1.76945	2.02289	1.95953	1.95875	2.03328	2.6654	2.60185	2.65346	1.36978	1.87335	2.93503	1.75977	1.873	1.9924	1.51084	1.76719	2.36428	1.95876	2.62511	2.3954	2.16899	2.2647	1.98387	1.76127	2.12345	2.75825	1.80925	2.02128	2.13389	1.4182	1.96021	1.96564	1.91157	2.38128	2.87658	2.29674	1.20583	1.63346	2.08475
7495						845.534	284.318	0.00859124	0.0754788	0.0657004	0.0313511	0.0270961	0.0827337	0.00975922	0.0310908	0.262658	0.221989	0.0305462	0.113884	0.027012	0.0108827	0.0199873	0.0387023	0.00846923	0.0483586	0.142229	0.491309	0.0873914	0.0488501	0.0251783	0.00882774	0.0170674	0.015474	0.0335759	0.213471	0.0299747	0.226074	0.00240975	0.00372894	0.417071	0.0139358	0.0197608	0.0322464	0.0138569	0.185215	0.0268922	0.0124711	0.0222591	0.068417
7428						840.611	505.246	1.51314	2.1416	2.89414	2.07573	3.60156	3.91484	3.52124	2.6715	4.55138	3.24467	4.74994	2.21648	3.56817	2.97037	2.49816	2.33743	3.82165	2.52521	2.65955	3.13793	3.03073	4.44401	2.39368	5.40862	1.80699	3.48351	2.86936	3.96035	3.44549	3.22695	3.13272	2.83589	2.96493	4.50462	3.48512	3.09939	6.05947	3.86882	5.46952	1.69346	3.23927	3.56961
7106						819.51	245.805	0.0238684	0.0754255	0.0962214	0.0589347	0.0581196	0.0745471	0.0640745	0.0939655	0.158961	0.0848274	0.125873	0.0457902	0.0286129	0.107226	0.070934	0.104618	0.063604	0.0651843	0.0678199	0.190226	0.0829417	0.0821408	0.0700068	0.147812	0.0450801	0.0751648	0.0750765	0.0717005	0.104424	0.0620684	0.0759988	0.0925278	0.0768584	0.089191	0.0725966	0.051115	0.138367	0.121071	0.111357	0.0336119	0.0670791	0.0831624
6163						752.521	436.753	0.3045	1.46869	1.32445	1.26829	1.82841	2.34119	1.67665	1.59146	2.2109	1.78227	1.3677	1.21979	1.07495	1.46492	1.63861	2.17104	1.15043	0.990062	1.66902	1.96591	1.52546	1.9442	1.40142	1.9284	1.05504	1.71356	1.36648	1.00448	1.49487	1.31426	1.62814	1.52431	1.36967	1.77827	1.38232	1.12401	2.46077	1.52006	1.20588	0.631214	1.14131	1.44943
7499						845.525	260.833	0.00409182	0.04179	0.036127	0.0168736	0.0292714	0.0125717	0.0372773	0.0482651	0.0709267	0.0322689	0.0400853	0.0255484	0.029915	0.0557407	0.0290101	0.0297472	0.0517771	0.025706	0.0246242	0.0698124	0.0355715	0.0220016	0.0354559	0.0759201	0.022826	0.0350507	0.0174788	0.0655016	0.0518503	0.0262415	0.0251067	0.0406618	0.0573954	0.039792	0.0484263	0.0187687	0.0508216	0.0418311	0.0495132	0.0133993	0.0354414	0.0386742
3421						528.308	92.7192	0.390475	1.55321	0.725037	1.29436	1.04047	1.34684	0.735373	2.0004	1.25687	0.444487	2.14425	0.806427	1.43024	1.0019	1.27268	1.32339	1.01408	1.01556	0.595896	1.6831	1.15375	1.26317	1.04072	1.10826	0.965124	1.54378	0.848905	0.714683	1.92524	0.569013	0.969658	0.715143	0.89169	1.3663	1.01169	0.829371	1.10314	0.42626	0.891477	0.580669	0.809603	0.978694
8447						909.548	339.178	0.207959	1.2052	0.831892	0.726547	0.732973	1.38281	1.51499	1.14908	2.73317	1.81681	1.25686	0.649847	0.767118	1.99887	0.939894	1.63407	1.00406	0.556757	1.1031	2.12483	1.21684	1.20687	1.11883	2.39358	0.639564	1.11587	1.29506	1.62309	1.36245	1.18911	1.82754	0.812449	1.02229	2.77761	1.62806	1.35893	3.03124	3.02935	1.65747	0.400431	0.889998	1.51899
5954						738.505	365.771	0.103508	0.297403	0.094445	0.274864	0.277899	0.200914	0.170845	0.318902	0.248755	0.117429	0.327172	0.127161	0.208175	0.224372	0.255411	0.302033	0.178801	0.175342	0.135886	0.27193	0.215562	0.291486	0.149232	0.232524	0.209954	0.239996	0.125656	0.191878	0.318749	0.136113	0.17721	0.19038	0.149071	0.233099	0.193242	0.198833	0.221883	0.201181	0.191487	0.067849	0.201124	0.196047
7399						838.594	454.925	1.84877	5.50503	4.95248	3.7395	5.06126	4.6233	6.92087	5.97327	7.13656	7.297	6.62148	3.53265	4.05302	5.71339	5.83966	4.12755	4.10542	5.06644	5.27675	6.73789	5.20662	5.04821	5.35839	7.88465	3.28281	5.19358	3.8648	5.24131	5.45248	4.67091	6.4642	4.45767	4.34456	7.47526	5.45678	4.03816	7.68186	6.76022	6.88848	2.84393	5.4818	5.3945
5898						734.482	329.742	0.00295191	0.0382384	0.00728912	0.0317068	0.00389698	0.0148971	0.00357577	0.0235938	0.0452225	0.0118461	0.0449333	0.00920536	0.0127115	0.0337391	0.0250043	0.0503294	0.0074653	0.0107981	0.0135689	0.043332	0.0217153	0.0324346	0.0217687	0.0110529	0.00305712	0.019447	0.0146531	0.0229155	0.0298371	0.011722	0.023258	0.0271757	0.00990959	0.0241791	0.0388614	0.0105065	0.0320917	0.0278554	0.0235275	0.00425871	0.018633	0.0203572
5948						738.535	459.024	0.19898	0.33685	0.490357	0.323426	0.436664	0.309765	0.676054	0.309443	0.39489	0.407247	0.310472	0.373272	0.238942	0.433462	0.281775	0.303953	0.520191	0.495627	0.35878	0.39705	0.37986	0.545268	0.285659	0.898908	0.247276	0.371533	0.354328	0.350402	0.502384	0.396877	0.371148	0.266464	0.349518	0.356908	0.305422	0.32512	0.40259	0.479026	0.374764	0.243658	0.296709	0.386198
8119						885.548	350.589	7.11601	34.0158	30.8578	34.8047	28.0419	48.0073	46.8115	34.7557	65.0277	50.3685	42.7075	22.9996	23.1245	57.7448	27.5217	45.5718	31.4461	21.79	43.3467	57.8798	37.697	43.2214	28.5358	58.3276	26.8889	38.1156	34.2686	51.3718	48.6558	44.7244	56.3763	48.7045	34.9916	67.0533	40.1875	38.333	76.549	72.48	42.3768	16.832	25.768	44.6881
5736						724.529	456.82	0.963737	5.82487	3.62574	2.70317	3.4276	1.86477	3.82454	2.95438	5.23416	5.26326	6.81517	2.16941	3.75306	8.33034	4.90078	5.14291	3.05703	3.10879	3.40951	6.08601	4.12296	5.62114	3.06851	2.90155	4.21878	4.89115	2.9992	6.1598	6.49962	3.47942	5.17319	3.06391	3.88902	3.53122	5.04458	3.59282	8.73934	9.0327	4.39278	3.15543	4.17766	4.68159
8120						885.541	307.778	0.129201	0.656581	0.663141	0.74061	0.459191	0.76841	0.757802	0.555963	1.13549	0.813041	0.724467	0.486296	0.407853	0.880763	0.550396	1.13789	0.442341	0.324685	0.713089	1.03004	0.668863	0.722732	0.489195	0.74637	0.679774	0.810794	0.672539	1.11842	0.689798	2.08879	0.848631	1.20463	0.589796	1.68625	0.758402	0.660349	1.4004	1.29084	0.454476	0.341509	0.477231	0.886546
7350						835.526	307.418	0.0528454	0.19042	0.166409	0.202624	0.155657	0.272555	0.353864	0.160011	0.250573	0.314008	0.227731	0.082815	0.0962987	0.305092	0.184641	0.297564	0.172778	0.0886684	0.18274	0.356287	0.205679	0.311113	0.156309	0.237723	0.178365	0.182096	0.17933	0.361932	0.247723	0.306772	0.211826	0.280387	0.0896572	0.462277	0.300436	0.208338	0.582488	0.619086	0.179935	0.0986406	0.12484	0.265964
6333						764.52	400.14	0.776127	3.52067	2.0341	3.67218	2.67959	2.50467	3.82292	3.45432	3.96258	3.96615	3.63682	2.15725	3.67407	0.0837075	2.77127	3.32795	2.86659	2.01888	2.91678	4.558	2.92023	3.18412	3.51768	3.32306	3.6583	2.72584	2.92479	4.48853	5.04218	3.32537	3.07148	3.82479	3.56033	3.72033	4.81272	3.39375	5.10872	6.55659	3.76574	1.48656	3.19409	3.73425
6053						745.503	323.754	0.0982005	0.397065	0.277493	0.375631	0.353236	0.374364	0.412932	0.39106	0.650221	0.430936	0.383263	0.255838	0.305297	0.39518	0.358912	0.507837	0.365954	0.243685	0.356582	0.607624	0.377066	0.700055	0.346395	0.332457	0.385026	0.386998	0.425483	0.499182	0.540833	0.348932	0.413023	0.412041	0.280759	0.457012	0.395777	0.292009	0.670127	0.623877	0.363754	0.15774	0.314763	0.417312
5889						734.499	368.349	0.0178957	1.56784	2.05031	0.736168	0.406568	0.749083	1.41049	2.9079	2.1225	1.5749	1.89363	0.924558	2.07825	1.69955	2.0761	0.999299	0.791052	0.476156	1.13293	3.08155	1.43484	0.843789	2.04838	1.32401	0.685453	0.660739	0.459379	1.63101	1.36545	0.607688	1.88145	1.46466	0.985002	2.82957	2.59658	0.40521	1.40574	1.46496	0.966524	0.151968	1.50853	1.26431
6162						752.536	409.06	0.166542	0.488825	0.169766	0.390674	0.232772	0.311302	0.365117	0.469917	0.303465	0.203672	0.444522	0.36952	0.557294	0.473181	0.465634	0.654888	0.366132	0.318953	0.32651	0.430901	0.375479	0.719038	0.301705	0.321379	0.454073	0.533745	0.426093	0.31308	0.374173	0.394065	0.338505	0.446185	0.384491	0.408662	0.346492	0.372044	0.569937	0.451388	0.44821	0.38546	0.326384	0.415756
6920						806.607	542.559	0.773014	1.56109	1.83191	2.20054	3.33271	2.52636	2.18231	2.2426	2.25157	1.86376	2.679	1.50892	1.50823	2.20504	3.21843	2.01411	2.19233	3.55751	3.34639	3.02311	2.30095	3.18719	3.14652	1.46727	1.4752	1.99302	3.09351	2.17926	2.75303	2.46064	2.25011	1.92556	2.1882	2.68382	3.79744	1.682	2.79945	2.88133	1.99044	1.23258	1.3732	2.32799
6412						770.561	478.149	0.80323	4.15077	1.87052	3.24718	3.10674	2.07107	3.7441	2.91768	3.48173	3.14465	3.27173	2.12394	3.37705	5.64233	3.057	2.6377	3.31223	2.35884	2.89689	4.31006	3.07627	3.78505	2.83064	2.44155	3.48656	3.03281	3.03895	4.61778	4.48927	3.5	2.75496	3.72863	3.45623	3.64307	4.44425	3.22047	4.19783	5.6339	4.31291	1.52946	3.91811	3.60312
8012						878.58	399.195	0.0885646	0.703665	0.120431	0.167093	0.119829	0.111414	0.0876354	0.105627	0.0744021	0.077423	0.125668	0.0956569	0.402733	0.0620224	0.120112	0.109097	0.121766	0.108051	0.0908237	0.0768012	0.148441	0.156948	0.0972759	0.0884832	0.0908315	0.0776769	0.111425	0.556334	0.0946015	0.104425	0.0931832	0.0792542	0.0317938	0.0718799	0.0596963	0.0847994	0.0710013	0.372322	0.0775603	0.0904392	0.120447	0.126519
5241						690.506	450.98	0.523842	6.03785	3.83733	2.39901	2.14855	3.331	3.68814	5.56677	4.33706	3.83515	4.60034	2.16017	4.53908	4.21922	4.7412	3.25449	2.29301	1.92194	3.19121	7.80018	3.72128	2.21415	3.91668	2.64589	2.80269	2.68066	2.36146	3.95728	4.17053	2.21694	3.49282	4.16263	3.76501	6.92752	6.74271	2.29905	3.27964	4.41508	3.1222	1.01745	3.49624	3.48433
7829						867.558	337.512	0.0117348	0.0374954	0.00367693	0.0266222	0.0180745	0.0211439	0.00456314	0.036368	0.0179191	0.000875799	0.0403556	0.0117307	0.023033	0.00963165	0.0238882	0.0293117	0.0105185	0.0119971	0.0046667	0.0228007	0.0183204	0.0125985	0.023097	0.00711323	0.0090164	0.0314708	0.0213297	0.00129582	0.0301107	0.00100706	0.0119138	0.00460621	0.0128367	0.0138424	0.0200799	0.0151238	0.00847533	0.000413484	0.0159769	0.0107832	0.0179232	0.0134507
7824						867.539	315.291	0.0109871	0.10103	0.0820338	0.0383191	0.0676395	0.128805	0.269427	0.0904807	0.112204	0.127365	0.200306	0.0441955	0.0729547	0.122746	0.104183	0.132238	0.121734	0.0662968	0.0706359	0.186057	0.107482	0.123189	0.130848	0.191751	0.0530299	0.110994	0.0742444	0.241255	0.106851	0.214414	0.139916	0.147488	0.185675	0.23287	0.336971	0.0647448	0.294742	0.251539	0.146759	0.0172107	0.0736756	0.156908
6036						744.554	499.233	3.82812	24.0477	17.7504	21.4252	17.6036	23.445	22.8892	23.2882	26.3628	20.6463	30.3436	15.2918	19.5871	28.9791	22.1668	22.9525	21.661	15.0274	21.7099	29.414	21.421	25.1415	17.812	22.1878	19.6826	22.0825	18.3626	19.5901	23.7113	21.63	23.3078	20.065	16.8911	27.8327	21.8517	17.9246	31.1431	27.8098	24.682	9.831	21.825	21.6682
4192						598.487	414.892	0.153464	0.216105	0.101822	0.143179	0.107114	0.0954984	0.127538	0.247957	0.108152	0.113792	0.257146	0.254021	0.23004	0.223038	0.312496	0.226601	0.229264	0.187384	0.253318	0.225881	0.190691	0.157288	0.127636	0.095047	0.182174	0.17908	0.171493	0.122445	0.137531	0.147883	0.161031	0.0981056	0.134029	0.156674	0.161379	0.135669	0.253216	0.163555	0.227354	0.231137	0.277429	0.166008
8176						889.579	394.572	0.0263461	0.267138	0.129189	0.345306	0.171937	0.205754	0.269208	0.116942	0.280874	0.340337	0.222446	0.066637	0.0856008	0.411164	0.182469	0.390486	0.165059	0.0879184	0.209769	0.374333	0.217446	0.442974	0.145071	0.243128	0.174416	0.414036	0.234147	0.022225	0.336773	0.271011	0.277521	0.206904	0.151772	0.399551	0.180762	0.190988	0.512292	0.534938	0.250623	0.0783501	0.164914	0.26162
7317						833.516	307.322	0.384589	1.4334	1.15425	1.46862	1.15057	1.98485	2.59476	1.11456	1.74877	2.03663	1.67989	0.569967	0.647403	2.14191	1.23804	1.99153	1.21672	0.615555	1.3524	2.49072	1.45076	2.20514	1.10848	1.7504	1.31446	1.26146	1.29102	2.58942	1.76739	2.28015	1.55091	1.99639	1.27189	3.17416	2.36435	1.52557	4.23586	4.59978	1.21192	0.681994	0.900143	1.95404
8491						913.568	352.89	0.00913918	0.0638964	0.0435941	0.0375833	0.0470082	0.0819808	0.0848741	0.0474521	0.13609	0.0586145	0.0372218	0.0498383	0.0431027	0.112853	0.0408691	0.0672559	0.00635112	0.0315509	0.0293681	0.0856142	0.0557129	0.0651839	0.0385724	0.0892698	0.0548419	0.0590562	0.0537421	0.0945761	0.0472415	0.0672932	0.0695236	0.119913	0.0624891	0.127327	0.0673	0.0675664	0.0726474	0.0949607	0.06413	0.01749	0.046081	0.0689603
8068						881.507	233.823	3.21361e-05	0.00474401	0.00148461	0.00350985	0.00120519	0.0027724	0.00329887	0.00294457	0.00583842	0.00208875	0.000685741	0.000252634	0.000819966	0.00146572	0.00125261	0.00206533	0.000145855	0.000259076	0.000499769	0.00177013	0.00185678	0.000601295	0.00114116	0.000416053	0.000721434	0.00147728	0.00176775	0.0135007	0.00329176	0.00622083	0.000755276	0.00940209	0.00128531	0.0112966	0.00219609	0.00199519	0.0123405	0.0123563	0.000120432	3.41083e-05	0.000585075	0.00407527
6305						762.582	426.575	0.392048	0.593488	0.478225	0.681401	0.70631	0.726868	0.500051	0.541617	0.763124	0.450864	0.587169	0.495622	0.444481	0.537721	0.500632	0.728433	0.584127	0.439499	0.559497	0.488444	0.559981	0.968021	0.48751	0.564028	0.44903	0.691952	0.665226	0.469486	0.60369	0.598054	0.528194	0.533567	0.480841	0.500819	0.573995	0.47181	0.897466	0.537274	0.585363	0.405585	0.380758	0.569634
7775						863.566	389.85	0.265373	1.03629	0.906792	1.65941	0.733209	0.968874	1.25208	0.853784	2.44464	1.44676	1.81909	0.614726	0.636913	2.45125	0.903119	2.13062	1.00937	0.609258	1.36547	2.10815	1.26076	2.07139	0.731014	1.56349	0.805055	1.69742	0.917386	1.39712	1.2419	1.57908	1.47028	1.10004	0.657594	2.18497	1.1236	0.881475	3.27616	2.2635	1.26676	0.546328	0.747056	1.37608
7689						858.548	249.07	0.105399	0.503544	0.0462278	0.408102	0.260962	0.269778	0.0767704	0.444787	0.17714	0.0373839	0.383815	0.11464	0.160037	0.155882	0.298039	0.260168	0.24132	0.189787	0.0603081	0.337915	0.2266	0.246174	0.250585	0.268734	0.199419	0.335918	0.185597	0.0824462	0.501612	0.0721707	0.171533	0.149791	0.193009	0.227036	0.242397	0.244106	0.1525	0.0458411	0.195707	0.0865488	0.199816	0.202547
7685						858.548	233.013	0.1883	0.77249	0.0459226	0.587532	0.440985	0.313364	0.123681	0.513849	0.255104	0.0364981	0.577341	0.162739	0.323749	0.237292	0.422353	0.514326	0.305686	0.271248	0.21261	0.406129	0.33556	0.595005	0.383611	0.2412	0.243225	0.472608	0.350811	0.146418	0.651536	0.120358	0.243285	0.193214	0.191004	0.327185	0.357172	0.298091	0.243421	0.0868675	0.280732	0.138787	0.289031	0.292678
5737						724.52	436.79	2.99414	8.04181	7.46987	8.25694	8.43779	8.02307	10.9591	7.72176	10.3847	9.27026	9.30428	7.46405	6.90356	11.7486	8.58502	7.91801	8.0974	8.49914	8.65151	10.1448	8.44378	11.058	7.44562	9.26613	7.95524	8.5706	7.86809	11.1918	11.1293	10.4906	10.7934	8.46236	8.08323	10.7635	8.31766	8.40012	13.2462	12.576	8.98879	5.65833	9.28488	9.47749
8148						887.557	350.237	1.15588	5.24927	4.80474	5.62595	4.51446	7.34971	7.33464	5.33782	10.5541	7.70559	6.63421	3.58379	3.7746	8.90447	4.26394	7.24958	4.90653	3.32537	6.40997	8.84018	5.87624	7.06562	4.48653	9.04106	4.19848	6.06944	5.16302	8.30875	7.42229	6.98524	8.60809	7.84397	5.42958	10.6504	6.19352	5.92335	12.3217	11.5039	7.00643	2.71985	3.97332	7.04573
7295						832.608	517.643	11.0365	12.8636	12.4937	12.2693	10.298	13.0882	10.9495	13.3328	15.0665	9.95087	17.6521	11.8749	12.9988	15.5692	11.5023	13.1411	14.1221	10.6775	13.292	13.1419	12.766	15.7208	9.29037	14.8367	11.1375	18.0923	10.8353	9.65879	12.5328	16.3677	13.3714	10.6074	8.91877	14.293	12.7646	11.6981	15.9205	13.4705	16.027	9.07158	11.9185	12.8267
6097						748.529	455.224	2.47536	8.02053	8.47414	11.4866	9.15564	10.8525	14.6996	9.22719	12.7808	11.4028	13.0348	6.43016	13.0341	11.8181	10.3317	11.9505	12.7235	11.7962	11.8025	16.0276	10.8762	14.3765	9.73441	10.228	8.39684	8.78842	7.46333	12.6116	11.5385	13.6768	14.1639	8.5223	12.3846	11.6248	9.95865	7.95346	16.7253	14.1581	10.4673	6.20797	8.01446	10.8498
6035						744.611	532.142	0.0731593	0.317858	0.137458	0.163825	0.210965	0.202973	0.205796	0.264462	0.436122	0.341919	0.502069	0.115729	0.171169	0.270277	0.296975	0.294133	0.12968	0.250388	0.214331	0.408367	0.250383	0.312998	0.197079	0.313834	0.232016	0.189166	0.174121	0.17496	0.233766	0.158743	0.184109	0.269844	0.146985	0.437348	0.254922	0.150687	0.334259	0.404978	0.420016	0.0848975	0.142303	0.240852
6481						774.543	448.26	0.831719	3.51085	2.78942	2.80884	2.83537	3.87314	4.71295	3.67968	5.37996	4.66155	4.39727	3.17727	3.30406	5.10786	3.74434	3.41655	3.18879	2.41706	4.43439	5.67297	3.6972	5.71524	3.09904	3.76098	2.88946	3.33552	2.84425	4.24137	4.18621	4.40745	4.45783	4.06952	4.02263	4.3802	4.04176	2.89644	4.99977	5.61025	4.17579	2.38665	3.75704	3.96387
6478						774.533	428.091	0.286899	0.885691	0.844235	0.553518	0.504362	0.819583	1.04756	0.850185	1.49487	1.19335	1.09782	0.804258	0.782319	1.16892	0.877445	0.949004	0.824547	0.630284	1.02172	1.19029	0.891344	1.28414	0.84212	1.00695	0.708065	0.763284	0.743808	0.835762	1.0847	0.97911	1.24125	1.09885	0.745061	1.17714	1.18922	0.788754	1.51023	1.37603	1.2457	0.520676	0.97362	1.00572
8146						887.563	368.623	1.11225	13.6487	3.30335	6.04275	4.50895	3.9278	8.87759	4.63001	7.65785	6.8045	4.62964	2.68029	5.08407	23.5148	4.45077	6.51402	4.41538	3.6405	4.90787	8.74722	6.45491	8.74376	5.37246	7.27636	5.9261	6.51938	5.49537	10.8279	8.91817	6.8339	6.92106	7.20881	7.30702	8.92873	9.53174	7.26717	12.3664	15.4437	16.1011	2.42887	5.77132	8.25947
8284						898.588	376.752	3.21361e-05	0.00308116	0.00239012	0.0165385	0.000814202	0.0107399	0.00562992	0.00125554	0.009098	0.00329181	0.00490455	0.00101079	0.00559306	0.00825583	0.0077221	0.0259162	0.0105867	0.0046459	0.0067969	0.0049895	0.00666464	0.0103137	0.00617972	0.0129338	0.00232304	0.0130773	0.000705239	0.00972373	0.00513816	0.0130195	0.0104525	0.00317242	0.00785865	0.00578011	0.00249125	3.40163e-05	0.0204301	0.0122618	0.0168575	0.00154689	0.000796845	0.00775482
5519						710.621	526.253	0.00153588	0.0302068	0.0208588	0.0281035	0.0137102	0.0336935	0.0129749	0.023899	0.0348228	0.0356945	0.0507046	0.0158937	0.0303161	0.0563129	0.0410749	0.0261889	0.0201391	0.0134853	0.0280995	0.0567716	0.0287243	0.0251146	0.0260009	0.0186752	0.0224257	0.0353429	0.0176168	0.0216445	0.0252269	0.012479	0.028629	0.0216731	0.0167276	0.0362826	0.0256303	0.0234532	0.0322352	0.0498731	0.0293703	0.00134234	0.0226346	0.0246189
7850						869.525	260.91	0.00664123	0.0388155	0.055342	0.0259615	0.0503705	0.0245574	0.07663	0.0559834	0.127027	0.0635991	0.0626691	0.0390397	0.0290686	0.0809015	0.0771161	0.0528633	0.0868447	0.0577271	0.0383678	0.158535	0.0604031	0.0513382	0.0438506	0.0743907	0.0285072	0.0527655	0.0555221	0.0676378	0.0707908	0.0631249	0.0661887	0.0481299	0.0867243	0.0477645	0.0506691	0.0396177	0.0832699	0.0923929	0.0690238	0.030485	0.0518921	0.0587043
5520						710.63	555.541	0.580919	1.80691	1.38614	1.41048	0.827662	1.08665	1.15954	2.01365	3.07135	1.6085	2.42095	1.35317	1.63625	2.14506	1.76463	1.9492	1.2404	1.36172	1.22442	2.42717	1.62374	1.19299	1.31358	1.34672	1.18922	1.53063	1.09703	1.19702	1.30218	1.26746	1.49738	1.28369	0.863479	3.35563	1.64126	0.950934	1.50472	1.32043	1.51865	0.620347	1.94143	1.39674
6709						792.555	461.863	0.586674	2.35679	1.88409	1.57763	1.53103	2.00746	2.45134	2.27704	2.69391	1.93812	2.08882	2.17959	1.77031	3.12396	2.21756	1.79516	1.35699	1.62049	1.61021	2.23313	1.96502	2.06602	1.53822	1.91284	1.7537	1.98382	1.39359	2.28611	1.95634	2.07641	2.00579	1.93225	2.1079	2.70381	2.57917	1.7399	1.91821	2.68807	2.82244	0.834669	1.95526	2.01273
9347						993.651	549.131	1.84255	3.69162	3.95151	3.06938	2.00872	2.28574	2.7104	3.35316	3.73113	2.71712	3.05569	2.70883	2.52962	2.7215	3.07187	2.88884	2.4476	3.08067	2.60345	2.88404	2.86767	2.18483	2.63213	2.29073	2.37537	2.62383	2.22203	1.9189	2.23043	2.81659	2.74882	2.43279	1.84068	4.24732	3.36013	1.88625	2.76873	2.47106	2.34713	1.99363	2.84653	2.51189
8060						881.532	499.279	0.318816	0.737514	0.520295	0.567981	0.526539	0.632071	0.628514	0.628433	0.726768	0.552926	0.765264	0.476272	0.574338	0.710605	0.6439	0.589793	0.621326	0.436074	0.609573	0.678958	0.597298	0.550186	0.534904	0.570165	0.596645	0.598459	0.577023	0.502328	0.590672	0.592776	0.585722	0.572138	0.498724	0.66639	0.595619	0.521751	0.657028	0.668166	0.652168	0.336569	0.642879	0.575516
8058						881.507	482.97	0.118453	0.241868	0.204387	0.234232	0.265906	0.258609	0.333958	0.2396	0.286779	0.254598	0.327607	0.32362	0.238194	0.223399	0.269608	0.254304	0.262757	0.249527	0.232695	0.341101	0.25806	0.274457	0.273757	0.307341	0.246006	0.22917	0.243086	0.271813	0.285069	0.264538	0.281949	0.252534	0.245961	0.35674	0.213566	0.229397	0.297776	0.313539	0.295138	0.262124	0.270704	0.270733
7998						877.58	407.018	0.171803	0.862383	0.627408	0.287671	0.449343	0.53458	0.785916	0.989748	1.31892	0.92095	1.29333	0.773571	0.849089	1.11455	0.908118	0.829625	0.723076	0.628661	0.715056	0.8709	0.782734	0.914211	0.774905	0.893083	0.58337	0.684124	0.64642	0.88904	0.647759	0.731056	1.12945	0.821683	0.629505	1.63703	1.3377	0.777591	1.39499	1.22885	1.44052	0.386433	0.841492	0.919461
8004						877.579	392.936	0.219259	1.48684	0.630101	0.70137	0.785574	0.639575	1.21117	1.39344	1.903	1.10689	1.60892	0.698783	1.49438	2.08879	0.887549	0.804079	0.897842	1.01788	0.843608	1.63218	1.10256	0.947851	0.985729	0.954102	1.16209	1.13016	0.774992	1.98352	1.04943	1.21943	0.94479	1.4381	1.489	2.02755	2.24366	0.85905	1.74943	1.76372	1.24596	0.512549	0.970168	1.27256
7890						871.569	361.482	0.018912	0.109437	0.0879813	0.0800154	0.0859026	0.147951	0.21042	0.181977	0.145127	0.111891	0.182867	0.0448463	0.101248	0.111081	0.101216	0.11964	0.102629	0.0785449	0.0920252	0.224386	0.116905	0.114601	0.117328	0.176471	0.0590066	0.108105	0.0629207	0.18675	0.133825	0.13815	0.223157	0.130998	0.157086	0.198464	0.139188	0.0443518	0.218017	0.193325	0.101899	0.0318184	0.0712116	0.130334
7472						843.52	260.87	0.0404195	0.257685	0.237854	0.120354	0.182016	0.0993268	0.231073	0.295246	0.453013	0.227297	0.255872	0.161231	0.181028	0.357067	0.195764	0.20966	0.243409	0.180978	0.170289	0.430584	0.226508	0.199352	0.223509	0.410474	0.153943	0.206071	0.125153	0.27342	0.296356	0.174085	0.169206	0.283118	0.358252	0.236536	0.303017	0.125258	0.355639	0.262431	0.316606	0.0928117	0.218059	0.239165
7796						865.502	227.794	0.0589456	0.327493	0.294849	0.0803402	0.234839	0.125013	0.27315	0.515557	1.0496	0.329222	0.444685	0.520955	0.0876535	0.600898	0.341264	0.366479	0.395269	0.18405	0.222826	0.581819	0.351745	0.403322	0.26196	1.18609	0.183732	0.433146	0.466018	0.421548	0.469143	0.26637	0.390177	0.514241	0.379863	0.372104	0.354708	0.354652	0.584831	0.563937	0.669467	0.222004	0.46873	0.448302
3517						536.38	449.377	1.09988	0.535301	0.730251	0.469849	0.665725	0.596197	0.490876	0.529319	0.445201	0.458231	0.515841	0.595097	0.500881	0.364979	0.497012	0.518657	0.625253	0.578587	0.551444	0.448007	0.560829	0.509785	0.544384	0.439729	0.507358	0.469869	0.563202	0.32387	0.463305	0.519064	0.422426	0.4416	0.535683	0.525584	0.460276	0.503663	0.326514	0.389086	0.444573	0.670172	0.577828	0.481899
6859						802.558	425.368	38.3037	84.6762	64.2311	87.2868	77.0644	75.6674	74.9066	68.5896	77.2012	92.6569	94.6898	59.4957	62.9326	95.4339	72.5967	101.523	68.8692	65.3326	74.4212	93.2572	76.4568	105.866	66.8696	74.4061	70.1101	68.8278	79.2045	72.818	100.262	73.8413	73.5479	74.4	59.0186	75.8194	65.3002	78.882	101.778	123.254	84.6349	59.9238	77.7001	79.3232
6959						809.494	318.24	0.00102746	0.0162401	0.0105752	0.00497314	0.00558706	0.00941537	0.0126361	0.0274962	0.0727881	0.0143583	0.0203424	0.0628402	0.00953741	0.032143	0.0106948	0.00794508	0.00647557	0.00950072	0.0121306	0.0185391	0.0182623	0.0171253	0.0125195	0.0429782	0.00929183	0.0100007	0.00583849	0.0228604	0.0294318	0.00867352	0.0153251	0.0409244	0.0105067	0.033598	0.0639236	0.0160959	0.0237939	0.0224796	0.0184477	0.00138668	0.0180293	0.0211615
6968						809.509	296.12	0.00147269	0.00951139	0.00303693	0.013032	0.00183015	0.00434131	0.0113492	0.00380593	0.0167401	0.00339159	0.00859384	0.0028749	0.00767499	0.0102307	0.00504481	0.0162355	0.00621924	0.00550686	0.00619391	0.0177674	0.00774268	0.0108744	0.00270692	0.00616123	0.00970551	0.009759	0.00598423	0.0126836	0.00687629	0.0110209	0.00727953	0.0107325	0.00470147	0.0201054	0.00587041	0.00822053	0.0122132	0.0107955	0.00680754	0.00418867	0.0039963	0.00853416
6691						791.504	436.691	1.22049	2.30607	2.20472	1.87782	2.39941	2.30142	2.51012	2.1786	2.51196	2.25357	2.48315	2.37262	1.8599	2.29994	1.44814	2.00918	2.32732	2.48271	2.23732	1.19678	2.12406	2.32262	2.0917	2.3663	2.13061	2.24431	2.27186	2.33732	2.64554	2.72	1.53155	2.08413	2.25998	2.53533	1.66909	2.18564	2.65315	2.08331	2.16213	2.029	2.44558	2.23846
4150						596.471	369.425	0.00310186	0.0159182	0.0100541	0.0173185	0.0127969	0.0323856	0.018911	0.0190376	0.0116653	0.0102884	0.0163478	0.0235342	0.0193435	0.0219328	0.0258226	0.018464	0.0115488	0.0104083	0.0070933	0.0183778	0.0162175	0.0205699	0.0153059	0.00533587	0.015643	0.0138822	0.00933262	0.0447298	0.0285202	0.0172515	0.02522	0.0113451	0.0142924	0.122375	0.010719	0.0147099	0.0760325	0.0560505	0.014737	0.0060505	0.0170768	0.026959
8419						907.535	296.637	0.0188637	0.116108	0.122469	0.0941302	0.0549623	0.108139	0.132484	0.102562	0.236791	0.130911	0.129817	0.0865778	0.0746621	0.165268	0.101726	0.204109	0.08913	0.0387923	0.103325	0.164388	0.113761	0.110483	0.103767	0.138102	0.112856	0.120265	0.132988	0.208665	0.100266	0.162889	0.170389	0.206527	0.0959534	0.339303	0.175033	0.14781	0.339032	0.270976	0.101158	0.0477473	0.0773413	0.158077
8415						907.535	283.695	0.0383319	0.244132	0.165371	0.232826	0.0600733	0.178028	0.304323	0.133819	0.366252	0.185716	0.264405	0.15443	0.165485	0.34592	0.132869	0.186305	0.153249	0.120481	0.140084	0.31599	0.194405	0.197468	0.133401	0.163798	0.313368	0.21031	0.20313	0.502881	0.2403	0.356382	0.203371	0.359233	0.300779	0.927062	0.46099	0.316683	0.905045	0.754527	0.211531	0.0786391	0.150107	0.34945
5486						708.613	526.274	0.0455529	0.424194	0.162331	0.338817	0.230945	0.25175	0.196879	0.278109	0.390303	0.382982	0.542129	0.196883	0.334905	0.594405	0.365338	0.360319	0.320922	0.169469	0.247403	0.631768	0.32327	0.237519	0.252888	0.257736	0.248238	0.373694	0.266402	0.265268	0.305123	0.215175	0.26918	0.234596	0.190793	0.320838	0.253972	0.207975	0.384579	0.382067	0.291776	0.117057	0.271959	0.267342
6425						771.517	333.751	0.0702955	0.653618	0.466357	0.648638	0.472103	0.597873	0.428354	0.302978	0.572998	0.446014	0.25143	0.279303	0.521217	0.433481	0.665949	0.720552	0.485401	0.385421	0.215693	0.525767	0.457172	0.756724	0.383081	0.548749	0.493196	0.717958	0.599426	0.676198	0.849605	0.765509	0.361762	0.627825	0.506245	0.482099	0.678436	0.541984	0.776585	0.508445	0.311437	0.143219	0.283629	0.550606
6430						771.508	317.175	0.0155545	0.0630422	0.0399604	0.0746043	0.0497861	0.051862	0.0465998	0.0551042	0.0860103	0.0575661	0.0633005	0.0573051	0.0421252	0.050969	0.0595189	0.0661654	0.0390451	0.0352836	0.0436201	0.245	0.0621211	0.220711	0.0469143	0.11312	0.0467266	0.0608456	0.0398866	0.130658	0.0752797	0.0429988	0.0841379	0.0554796	0.0402058	0.118185	0.0994524	0.0787885	0.0689982	0.0599213	0.0437278	0.0241597	0.0386903	0.0744444
7267						830.59	478.582	25.336	47.2679	33.8793	51.0785	43.075	45.2004	41.6406	35.6646	41.1934	52.0702	64.4273	29.6391	31.8957	56.5524	36.9179	51.186	42.5057	35.0722	40.447	43.4143	42.4232	71.1245	34.801	40.4353	37.8586	41.293	48.8775	37.3197	55.0364	48.6219	40.1344	39.9708	33.3147	40.9646	37.8328	45.6525	63.3745	62.877	56.0507	35.0729	44.4213	45.7517
7927						873.576	361.365	0.000469015	0.00665855	0.00613132	0.00695704	0.00331976	0.0136833	0.0201952	0.0121405	0.00947149	0.0126453	0.0189099	0.00195823	0.00789342	0.00362617	0.00901163	0.00693355	0.00818018	0.00461928	0.00659935	0.0260417	0.00927225	0.00618218	0.0119221	0.0166754	0.00632181	0.00140228	0.00124313	0.0162141	0.0101496	0.00887888	0.012841	0.00635063	0.0179584	0.0211463	0.0137808	0.00702894	0.0212944	0.0141664	0.00292085	0.000799566	0.00464859	0.0100963
7922						873.55	345.511	0.0109462	0.138647	0.0687871	0.0988416	0.101507	0.0719846	0.13151	0.085481	0.140591	0.106613	0.0650634	0.0396851	0.0939511	0.191735	0.086074	0.161071	0.0781378	0.0373694	0.0897079	0.122238	0.0959971	0.199209	0.0883372	0.109614	0.137858	0.138058	0.109602	0.143426	0.115496	0.140161	0.0994459	0.137326	0.154403	0.152609	0.216895	0.12252	0.198152	0.182078	0.137742	0.0350321	0.111113	0.136454
6460						773.533	365.83	0.313231	1.55748	1.24491	1.90096	1.81906	2.51048	1.52638	1.80286	2.61016	2.57224	2.02828	1.1043	1.23214	2.40525	1.49553	1.54742	1.63496	0.932	1.19468	3.0524	1.72424	1.99282	1.88281	1.96021	0.993153	1.5522	1.37464	1.66418	3.16785	2.07362	2.66548	1.80871	2.18	2.78536	1.80301	1.37966	3.39289	2.4584	1.62408	0.776122	0.945266	1.92402
6861						802.615	463.145	0.145401	0.193059	0.181229	0.167943	0.263967	0.141166	0.209537	0.244255	0.221925	0.834468	0.827853	0.282391	0.134339	0.221169	0.549964	1.08082	0.303529	0.176403	0.222383	0.278993	0.334039	0.327741	0.151438	0.120466	0.261526	0.121811	0.225026	0.166262	0.230012	0.239401	0.678544	0.208342	0.48496	0.140848	0.203506	0.122953	1.01511	0.260482	0.220481	0.281052	0.221955	0.284096
4683						646.604	545.761	0.00301948	0.0357158	0.013982	0.0360535	0.0141528	0.0357895	0.0279575	0.0388873	0.0645764	0.0547907	0.0599753	0.0277546	0.0317578	0.06147	0.0530854	0.0289139	0.0287597	0.0230356	0.0290923	0.0892484	0.0379009	0.0323865	0.0343224	0.0323678	0.025537	0.0452448	0.0168141	0.0216127	0.0263816	0.0249178	0.0361523	0.0183637	0.0137694	0.0782613	0.044167	0.0162771	0.0461154	0.0300529	0.031831	0.0157419	0.018892	0.0304604
7102						819.521	408.726	0.0426278	0.123663	0.0414835	0.0989598	0.0547094	0.0761657	0.0762086	0.106579	0.0628672	0.0455465	0.0902539	0.100302	0.138257	0.0961536	0.123809	0.155966	0.0843645	0.0910293	0.0817195	0.0930585	0.0891862	0.172005	0.0622185	0.0604455	0.120994	0.127287	0.107822	0.0595785	0.0727712	0.0961949	0.0865408	0.0796076	0.0954816	0.0842987	0.0677513	0.104131	0.12194	0.0950742	0.0962803	0.0943029	0.0696494	0.0937188
6487						775.531	372.207	0.356888	0.876171	0.4413	0.467842	0.610882	0.343866	0.714681	0.789679	0.358002	0.176457	0.547895	0.433095	0.467679	0.811963	0.682523	0.82094	0.588705	0.512417	0.515667	0.441139	0.54789	0.957096	0.641136	0.276275	0.571493	0.803209	0.502129	0.572531	0.382576	0.733352	0.271243	0.719622	0.347186	0.423736	0.689883	0.636724	0.915485	0.935657	0.456422	0.548428	0.399765	0.589197
8283						898.553	330.344	0.000535363	0.0124512	0.00952359	0.00896721	0.00786219	0.0140046	0.0123487	0.00416846	0.0198184	0.0115599	0.00838202	0.00404526	0.00635253	0.0125136	0.0063477	0.0196246	0.00362501	0.00289817	0.0105697	0.0159619	0.00957801	0.0122313	0.00637022	0.0139749	0.00709119	0.0018508	0.0098366	0.0150065	0.00839919	0.0128666	0.00955545	0.0233459	0.0126462	0.0244416	0.0181236	0.00705525	0.00363564	0.0185453	0.00651729	0.00141272	0.00661112	0.0109759
6679						790.617	484.04	0.070148	0.156794	0.110931	0.190966	0.174369	0.186562	0.134372	0.12001	0.222579	0.156698	0.0895701	0.114923	0.0842226	0.162471	0.108599	0.157003	0.141664	0.073949	0.0879097	0.105234	0.132449	0.381541	0.162403	0.130819	0.173001	0.16252	0.185012	0.104931	0.10719	0.204111	0.0836096	0.145191	0.183754	0.110393	0.11889	0.169703	0.284013	0.219155	0.159382	0.128262	0.100599	0.165724
7712						859.691	683.528	0.168129	0.808059	0.488298	0.565204	0.718102	0.643425	0.640512	0.68553	0.620119	0.469308	0.816983	0.331756	0.72262	0.722203	0.640571	0.676151	0.525956	0.577156	0.613449	0.935243	0.618439	0.704795	0.734034	0.998052	0.701056	0.632339	0.860284	0.616324	0.978832	0.607853	0.512519	0.529039	0.677543	0.810055	0.848586	0.629811	0.830512	0.888409	0.964001	0.165746	0.633517	0.716165
7709						859.69	598.959	24.5099	87.3587	56.555	66.4608	75.7289	74.6227	78.8337	92.7311	89.9784	98.2242	110.123	52.3252	80.5448	99.931	77.2375	84.7014	76.5438	60.3642	68.3938	101.996	77.8583	88.8207	81.897	88.826	75.3675	74.3096	68.489	94.7361	120.673	66.0208	93.6173	74.4844	71.4657	98.3246	102.605	74.7334	93.6665	105.523	99.7114	42.3854	66.374	84.1015
6246						758.499	338.877	0.12949	1.82377	1.74309	2.79993	2.17717	2.22108	2.29713	1.9955	3.27116	2.98365	1.93542	1.06374	1.43607	3.34884	1.80297	1.94156	1.12247	1.05159	2.41957	1.47045	1.95173	4.34916	2.26131	2.39729	0.767015	1.55586	1.664	2.58371	2.93979	0.905762	2.15748	1.96609	0.934748	2.37061	1.67123	1.73617	3.79198	4.77959	2.10855	1.33364	2.06309	2.21685
6290						761.559	388.881	0.139578	0.199561	0.301532	0.295011	0.140207	0.185274	0.195886	0.328875	0.166619	0.184324	0.215836	0.185853	0.283763	0.276842	0.18208	0.238815	0.189223	0.178754	0.204053	0.199297	0.214569	0.239204	0.106622	0.289165	0.134475	0.378872	0.124179	0.22375	0.190541	0.194973	0.22091	0.154131	0.138178	0.146402	0.177783	0.179919	0.172853	0.224152	0.240475	0.206881	0.162398	0.195293
6292						761.515	372.657	0.278524	1.20419	1.04414	1.35404	0.9718	1.13257	1.15152	1.23694	1.5192	1.06064	1.55872	0.856744	0.874563	1.37049	1.32416	1.44064	0.925791	0.937347	1.04866	1.68788	1.14893	1.78664	0.930241	1.16112	1.00359	1.06808	0.943559	1.26186	1.33869	1.24843	1.56824	1.06264	0.715336	1.83816	1.09182	0.9309	1.7743	1.98779	1.03492	0.677282	1.03522	1.22294
5778						726.615	514.505	0.049349	0.134983	0.0833357	0.102643	0.105125	0.108398	0.0976384	0.14576	0.128066	0.131174	0.177831	0.11773	0.126338	0.182431	0.164043	0.140953	0.123434	0.103615	0.159492	0.194586	0.128846	0.105145	0.116657	0.0791093	0.0940853	0.12077	0.0992556	0.0963049	0.109431	0.0971	0.109725	0.0984436	0.119173	0.138815	0.0931211	0.0858411	0.160445	0.14148	0.136098	0.0733273	0.131454	0.110289
6746						794.561	461.774	0.190032	0.444002	0.350555	0.410732	0.363114	0.420888	0.478504	0.0282743	0.60774	0.44834	0.437305	0.226793	0.340261	0.568816	0.385702	1.09141	0.29515	0.359067	0.327885	0.399889	0.408723	1.33874	0.330654	1.04536	0.204579	1.11193	0.31174	0.469267	0.529265	0.40899	0.368302	1.03977	0.416257	0.463958	0.476775	0.378606	0.443259	0.48388	0.543087	0.217213	0.3645	0.547306
7105						819.577	454.124	0.0131374	0.0345818	0.0543111	0.0582138	0.034168	0.0468749	0.0228758	0.0257377	0.0467579	0.0653044	0.0847159	0.0214303	0.0226415	0.0456664	0.0521487	0.0618579	0.0517429	0.0270133	0.0421745	0.0453633	0.0428359	0.0749591	0.0232956	0.0241148	0.0471979	0.0318177	0.0482984	0.0510143	0.0290424	0.0387337	0.0519774	0.0447922	0.0450657	0.0463204	0.0817379	0.0389769	0.0585167	0.108283	0.0713365	0.0233993	0.0273217	0.0483101
6696						791.532	404.967	0.0708961	0.466256	0.543383	0.230798	0.25823	0.349156	0.39971	0.532376	0.770111	0.609682	0.577673	0.405809	0.414256	0.593241	0.54635	0.556266	0.393936	0.280894	0.492393	0.592915	0.454217	0.507726	0.436892	0.593545	0.459628	0.366506	0.310548	0.552578	0.494729	0.146574	0.646275	0.465478	0.236378	0.716513	0.595918	0.495246	0.609925	0.317802	0.614934	0.143209	0.415791	0.45631
5383						700.601	556.072	0.0982172	0.12975	0.15075	0.11975	0.0666055	0.100554	0.101142	0.172974	0.234979	0.116504	0.202523	0.155414	0.162207	0.134671	0.169469	0.173662	0.104555	0.136858	0.123429	0.183123	0.141857	0.0959063	0.110484	0.107734	0.107064	0.135255	0.1135	0.0832846	0.10142	0.11001	0.12936	0.10629	0.0747065	0.258911	0.121809	0.0918428	0.0947075	0.103605	0.129878	0.0706862	0.214824	0.118064
5382						700.609	531.558	0.100868	0.50646	0.205445	0.380396	0.338933	0.454898	0.422769	0.527139	0.733364	0.456005	0.8157	0.32727	0.539381	0.870364	0.373137	0.60385	0.400678	0.334677	0.35315	0.720967	0.473272	0.580477	0.389894	0.609481	0.360722	0.475998	0.465951	0.40481	0.759573	0.423935	0.447861	0.481908	0.403153	0.577511	0.392367	0.435894	0.576802	0.569338	0.678737	0.204312	0.397243	0.481798
7990						876.576	392.935	0.544739	2.80552	1.39682	1.50263	1.65844	1.31058	2.38757	2.61407	3.58532	2.2914	3.03488	1.46012	2.81491	3.92706	1.73351	1.63448	1.82366	2.0895	1.88229	3.07271	2.17851	1.87623	1.89993	1.96703	2.34241	2.20145	1.5668	3.66706	2.25697	2.46397	2.01662	2.74701	2.90312	3.77809	4.30431	1.76716	3.26719	3.26656	2.44665	1.07227	1.97414	2.48925
6161						752.551	482.303	3.78108	10.3202	9.47921	11.548	14.3983	11.817	14.6973	12.7461	16.0941	12.9069	14.5538	17.1801	10.1406	15.0123	11.3824	12.4845	11.6536	11.541	11.835	17.4059	12.5489	16.2373	11.1967	15.0139	9.42295	11.893	10.9816	17.4726	13.5054	14.1142	14.4861	11.3835	11.2397	22.5881	13.3464	13.7401	15.7163	18.5946	13.7722	8.73919	13.7847	13.8614
6164						752.551	469.95	0.796426	3.12229	2.99443	3.39844	2.31037	3.45079	4.13672	3.50913	4.66215	3.49458	4.05417	2.81576	2.98228	3.64204	3.35051	3.11674	3.44294	3.01863	3.6239	4.36379	3.3143	4.0116	2.80902	3.20993	2.72273	3.18793	1.9544	3.93763	4.15248	3.51201	4.36684	3.04713	3.60553	4.32677	2.8689	2.34338	4.83376	4.26809	2.89969	1.87374	2.65566	3.32936
7704						859.532	337.117	0.0423726	0.345032	0.217045	0.377324	0.281709	0.380977	0.466957	0.2359	0.38229	0.296775	0.223558	0.199176	0.24266	0.481829	0.289948	0.412627	0.278513	0.187318	0.248894	0.464169	0.302754	0.471413	0.264555	0.265674	0.447816	0.350407	0.372486	0.59364	0.397329	0.516169	0.330478	0.409756	0.30617	0.429326	0.40985	0.44732	0.612046	0.650067	0.289291	0.123915	0.372421	0.403006
7696						859.532	321.449	0.702939	8.65112	2.94455	4.02835	5.66096	2.50172	11.0794	3.3336	5.19002	4.96019	2.5232	1.80398	3.95501	8.22636	2.98022	4.53662	3.36065	4.04575	4.57389	6.4004	4.57295	4.84839	3.26371	3.89756	5.046	3.8476	6.1402	13.1961	5.79955	5.62695	5.27648	6.34714	7.41292	8.04141	7.63168	8.50278	10.1114	8.85063	7.33794	2.89071	4.4075	6.42384
7700						859.525	301.959	0.407812	2.43828	2.51202	2.39873	1.95886	3.23106	3.53505	2.48263	4.68333	3.14723	2.65992	1.4649	1.69111	3.13883	1.87647	3.51622	2.02585	1.29374	2.85424	4.71329	2.60148	2.58151	2.00938	3.42114	2.31801	2.55969	2.13194	4.04272	3.20256	3.41953	3.42045	3.83583	2.33141	5.74951	3.01663	2.46491	4.851	4.40538	2.24375	1.02334	1.86001	3.04443
6051						745.548	351.67	2.63745	8.55086	7.5853	7.2847	6.98744	6.52371	8.34395	9.4022	7.76415	6.99402	10.8593	5.99467	7.85613	8.23597	3.45354	8.49546	7.67019	7.18038	8.36815	9.38533	7.47864	8.94283	5.6655	8.39972	6.33665	8.32937	6.60035	7.75026	9.77399	7.50436	8.48166	6.63388	7.00921	9.38654	8.35489	6.84136	11.6574	8.55147	8.10528	5.96928	7.57009	7.8932
7679						857.676	608.742	0.417271	1.0345	0.9505	0.880283	0.732391	0.71318	0.733167	1.15801	0.476384	0.853438	10.5238	0.956836	0.828047	1.04302	0.865356	1.09548	0.794344	0.843707	1.10844	0.981606	1.34949	1.01442	0.788498	0.970225	0.728156	0.939006	0.704111	0.776747	0.947261	0.828639	0.90425	0.715409	0.772008	0.866546	1.01495	0.696723	1.0659	0.942434	0.924534	0.46021	0.79976	0.842989
5817						728.639	566.99	0.216948	1.39236	0.557244	1.05112	0.962958	1.01901	0.994727	1.21053	1.35462	1.09976	1.61497	0.796033	1.45384	1.93376	0.951672	1.61275	1.14861	0.876999	0.830929	2.09469	1.15868	1.24504	0.916394	1.29113	0.47764	1.0857	1.11169	1.20537	2.09189	0.888483	1.92113	1.17869	1.28715	1.31355	1.1661	1.0478	1.23866	1.31724	1.48847	0.448983	1.07528	1.18982
5814						728.624	557.121	0.0604412	0.099336	0.100608	0.0846796	0.0481965	0.0781968	0.0721493	0.122865	0.182723	0.0915796	0.138565	0.105624	0.102754	0.11954	0.12119	0.135436	0.0832807	0.0903336	0.0807931	0.134682	0.102649	0.0531882	0.0697493	0.0603342	0.068365	0.0929238	0.0628355	0.064995	0.0648866	0.0819701	0.090366	0.0774456	0.0500265	0.18729	0.0886338	0.0555795	0.0905986	0.0719081	0.080555	0.0499066	0.139752	0.0800655
5816						728.629	545.284	0.223212	0.909598	0.569113	0.584276	0.472562	0.644317	0.552289	0.726623	0.74616	0.685747	0.730006	0.623261	0.668705	0.696306	0.849379	0.74074	0.626546	0.572194	0.730393	0.803932	0.657768	0.525591	0.569743	0.476801	0.560899	0.60207	0.513921	0.465289	0.521613	0.570963	0.653182	0.521555	0.481651	0.687688	0.499821	0.477732	0.643718	0.632113	0.631417	0.409179	0.307358	0.537615
6656						788.545	456.934	1.17029	2.11026	1.88755	2.79134	1.86533	0.768131	2.11741	0.856503	0.849044	0.703522	1.10811	0.351595	2.64497	1.28058	1.93168	2.35509	3.24419	1.88346	2.37425	1.00882	1.66511	2.52303	0.696984	2.42583	0.469308	2.20905	2.2114	1.75299	1.19457	0.614373	0.864448	0.686292	0.562983	0.889278	0.830578	1.81819	2.7072	1.93392	2.3809	0.542883	1.88684	1.46005
5646						719.533	341.587	1.65259	4.0427	2.5514	3.81793	2.30517	3.32437	3.30417	3.84552	3.61476	2.59714	4.20779	2.96115	4.15224	4.60503	3.42659	4.94368	3.11805	2.83731	3.48953	3.67273	3.42349	5.59458	2.69537	3.24071	3.18981	3.48954	3.72062	3.21074	3.44124	3.61033	2.92392	3.57716	3.02244	4.40224	3.86284	3.48963	6.25379	4.99319	3.874	2.63982	2.65066	3.69413
6661						788.523	391.533	0.51294	4.61396	3.05782	5.83957	3.94641	3.93318	6.41815	6.50353	8.72235	7.17445	6.44307	2.11783	5.34202	12.7512	4.21823	4.90991	4.24132	2.88484	5.56138	10.9256	5.50589	4.17241	4.21916	4.59459	4.31845	3.71832	3.40863	8.28806	8.03224	5.91163	4.90386	6.38626	5.88679	9.55843	10.3699	3.73438	13.3045	12.3598	5.45471	1.55501	3.59307	6.1885
5295						694.591	562.532	0.0139574	0.044518	0.029259	0.0445216	0.0376555	0.0685667	0.0400091	0.0324862	0.0493767	0.0300297	0.0551984	0.0539998	0.0510205	0.082957	0.0862824	0.104007	0.0304589	0.0213093	0.0730888	0.0590783	0.050389	0.0416494	0.0237582	0.0294886	0.0322228	0.0439853	0.0338145	0.031176	0.0422982	0.0404301	0.0306385	0.0218303	0.0276245	0.0514016	0.031179	0.0193086	0.0532187	0.03817	0.0370849	0.0307151	0.0467691	0.0353382
7675						857.676	550.091	17.8672	49.4158	50.4846	45.8324	26.3313	33.7347	38.7149	49.4691	66.8128	44.8091	49.8827	29.9334	34.1483	44.9756	46.3374	42.6495	32.3068	43.4091	34.2348	50.3712	41.586	37.6541	37.6962	34.7551	33.0457	38.4595	27.7085	31.8724	32.9594	37.8612	44.6271	34.0934	21.3153	77.4663	54.9115	24.5377	47.5104	45.0494	33.8894	22.0593	35.5087	37.649
8297						899.647	553.428	7.9849	20.5201	13.5121	16.5279	18.4399	17.8268	17.4811	18.2473	22.5645	21.525	21.4939	13.2549	15.973	23.692	16.2866	17.1294	20.0111	14.684	16.1558	20.1818	17.6746	21.779	20.1276	19.482	19.2866	18.944	17.0231	18.4133	23.4108	18.645	18.3583	18.8162	14.871	17.8066	17.038	17.3796	20.1511	23.7787	21.8957	12.9891	15.4185	18.7807
8298						899.638	515.019	0.169559	0.393875	0.354782	0.304363	0.432302	0.373429	0.456723	0.569142	0.533508	0.411149	0.336276	0.379402	0.438826	0.434425	0.335867	0.361181	0.394821	0.305701	0.385579	0.525289	0.39481	0.46291	0.329246	0.464483	0.418438	0.392201	0.314739	0.367479	0.540289	0.383884	0.392345	0.396694	0.447726	0.421149	0.417946	0.387219	0.472435	0.473051	0.38589	0.291921	0.333827	0.404693
7353						835.522	483.498	0.289372	0.527047	0.589572	0.626171	0.703108	0.587197	0.662559	0.654128	0.727335	0.59677	0.573175	0.766838	0.73415	0.627749	0.631893	0.584659	0.676147	0.655874	0.675927	0.66552	0.62776	0.557193	0.668636	0.643498	0.531867	0.617942	0.598039	0.54067	0.632654	0.655162	0.727022	0.621469	0.642075	0.826518	0.530707	0.549152	0.53877	0.626613	0.569533	0.569461	0.599366	0.612317
7352						835.527	459.711	1.88361	2.82377	2.39585	2.17548	2.71984	2.99903	2.70835	2.40589	2.99292	2.58639	2.46259	2.56451	1.99841	2.16742	2.24542	2.08108	2.52937	2.27401	2.41727	2.5518	2.44915	2.04985	2.40775	2.17662	2.12369	2.07062	2.57926	2.45555	2.4526	2.61427	2.18619	2.50933	2.60776	2.37732	2.24004	2.11857	2.33387	2.50852	2.21716	2.27898	2.29133	2.32996
4786						655.457	334.293	0.00298493	0.0241702	0.00370154	0.252904	0.0105969	0.00931279	0.00708459	0.00699206	0.00767092	0.00787211	0.00558993	0.00456451	0.00364475	0.00310788	0.0110703	0.00449114	0.134277	0.008447	0.0057816	0.00389159	0.0259078	0.00861603	0.00947761	0.00345337	0.00489404	0.00781411	0.00727892	0.00931921	0.0109267	0.00692581	0.00806096	0.00947708	0.00232056	0.00836547	0.00784311	0.0040534	0.00359727	0.0040878	0.00484923	0.0023835	0.0125831	0.00681636
7674						857.509	259.301	0.00044102	0.0178077	0.00938887	0.0108519	0.00601933	0.0098648	0.0198711	0.00967542	0.030181	0.0125935	0.0102066	0.00200186	0.00908574	0.0159967	0.00653043	0.0148963	0.00250999	0.00284616	0.00912625	0.0257908	0.0112843	0.012524	0.00211371	0.00475197	0.0191361	0.0107506	0.0105747	0.0250251	0.0118217	0.0180052	0.0145665	0.0317687	0.0127966	0.0391142	0.0113009	0.0126495	0.0290054	0.0227812	0.00472374	0.0027864	0.00469076	0.0150444
7475						843.66	539.978	1.25824	2.65921	1.96643	3.56856	3.51201	2.20417	3.86164	3.54312	3.33985	2.31227	5.0324	3.30127	2.89522	4.69155	2.26696	4.75598	2.88786	1.79206	3.64467	5.1905	3.2342	5.19476	3.27863	4.35661	3.20653	2.43543	2.04528	3.39531	4.58119	3.29067	4.01777	2.41271	3.91079	5.79328	4.15358	2.92415	5.21975	3.32866	4.02178	2.25891	1.904	3.58649
7672						857.538	229.6	0.014836	0.0676132	0.00868083	0.0409682	0.0426877	0.0236522	0.00919821	0.108002	0.0292302	0.00101545	0.100247	0.0255833	0.0292343	0.00503271	0.0732411	0.0349783	0.0190369	0.0191867	0.0055358	0.036764	0.0347362	0.0193563	0.0370809	0.0302649	0.0169556	0.0515148	0.0266374	0.0147107	0.123031	0.0071775	0.0241943	0.0156178	0.0360559	0.025417	0.0366846	0.011748	0.0184967	0.00304148	0.0442417	0.0063731	0.0212796	0.028494
8664						927.668	564.309	0.499611	1.61446	1.15884	1.08706	1.19868	1.70531	1.32239	1.56124	1.52131	0.78815	1.74721	1.09939	1.2093	2.13106	1.10217	2.06407	1.24471	0.970829	0.876658	1.82812	1.33653	2.33228	0.619207	2.05321	1.64782	1.29275	0.961291	1.23427	2.31357	1.05234	1.43826	1.11745	1.81646	1.87277	1.35875	1.03907	1.76496	1.74172	1.34799	0.524589	1.05339	1.42911
8638						925.661	563.779	3.7051	10.5333	7.27783	7.96443	8.5634	8.22816	8.26892	10.1534	12.4355	8.47257	10.4513	5.86485	9.74613	9.21909	7.56928	10.0282	9.03907	7.4523	9.76081	11.9531	8.83434	11.3907	7.24948	10.5246	8.70332	8.26083	7.34657	9.02986	11.9903	6.9833	9.21707	8.07565	9.20709	13.2091	8.7216	6.91962	12.3905	11.0659	8.84212	4.36019	8.0551	9.07715
8640						925.661	549.814	6.27001	12.8814	13.5182	10.5549	7.05514	7.98367	9.73679	11.8335	15.5868	10.9453	12.7945	8.44218	8.37936	10.1744	12.7514	10.1426	7.98651	10.4431	9.61405	11.1698	10.4132	8.5052	8.72205	8.60031	8.90021	9.04621	7.3341	6.56625	8.30764	9.40072	11.3047	8.04658	5.74187	17.5521	12.2437	6.51143	10.4571	8.8515	7.90991	6.52014	10.1208	9.03213
8639						925.654	513.934	0.315792	1.02187	1.08814	0.918472	0.726975	0.826001	0.885931	1.12992	0.897757	0.944734	1.06928	0.582501	0.758567	0.962543	0.965314	0.834819	0.760373	0.722651	1.04426	1.31188	0.88839	0.90104	0.813352	0.670614	0.707914	0.738436	0.661592	0.740013	1.02565	0.669543	1.1475	0.715073	0.761188	1.01886	0.939794	0.657775	1.1331	0.948838	0.679977	0.482535	0.900713	0.815676
8264						897.518	499.229	0.0406376	0.0709188	0.0520421	0.0459386	0.0539403	0.0620429	0.0530665	0.0668406	0.0586009	0.0474565	0.0572936	0.0527997	0.0563998	0.0565938	0.0600155	0.0422358	0.0694321	0.0411104	0.0627144	0.0651233	0.0557602	0.047913	0.050912	0.0532326	0.0545757	0.0491027	0.0572976	0.0507481	0.0509884	0.0605533	0.0550829	0.0561094	0.0490357	0.0627892	0.0531461	0.05269	0.0430308	0.0544875	0.0520997	0.037661	0.0783105	0.0534883
7888						871.566	489.51	0.0117016	0.0256831	0.023206	0.0589974	0.0111026	0.048913	0.0280132	0.034033	0.0342881	0.0270202	0.0356688	0.0339415	0.0189078	0.0371916	0.02012	0.0175411	0.014731	0.0228933	0.0490828	0.037045	0.029504	0.0599018	0.0151199	0.0452529	0.0297136	0.0476854	0.017361	0.0439393	0.051053	0.0527499	0.0468595	0.0516725	0.0325963	0.0216403	0.0237935	0.0391137	0.0342597	0.0759595	0.0308403	0.031822	0.038914	0.0395124
8619						923.655	480.81	0.0575953	0.230364	0.0561373	0.234456	0.217767	0.209374	0.100163	0.224287	0.143556	0.0338741	0.247641	0.107639	0.122071	0.133503	0.152786	0.16569	0.105886	0.128036	0.0580616	0.216778	0.147283	0.133433	0.0764206	0.0825666	0.0504737	0.119172	0.0748656	0.0243424	0.222647	0.0220774	0.0743534	0.0364058	0.0636455	0.0767504	0.0436875	0.101115	0.0652752	0.0145404	0.0448112	0.0521308	0.0259039	0.0702309
8511						915.588	382.303	0.0221079	0.142387	0.109071	0.110777	0.0901572	0.191423	0.198721	0.102032	0.173267	0.143123	0.0878052	0.0870089	0.0900721	0.183836	0.0963856	0.108937	0.100473	0.0792283	0.114356	0.159079	0.119512	0.168636	0.0769354	0.144502	0.12294	0.156888	0.130846	0.188305	0.152888	0.167578	0.17217	0.140905	0.119539	0.199338	0.109613	0.153529	0.202541	0.268011	0.109268	0.0625042	0.0833435	0.146514
7676						857.664	513.851	1.0969	4.14971	3.6071	4.05458	2.81412	3.65677	3.61191	3.85358	3.87728	5.01716	4.77286	2.32671	3.57561	4.312	3.84879	3.47319	3.03309	2.72906	3.83479	4.91853	3.62819	3.93927	3.78296	3.25592	3.58126	3.25845	2.83315	2.98188	4.53734	2.94076	4.15176	3.31832	2.85725	4.35293	4.07603	2.72546	5.28401	4.41133	3.53439	1.81687	2.8489	3.52441
8101						883.689	591.503	0.0380846	0.213761	0.120407	0.168743	0.313151	0.163299	0.160298	0.115302	0.117246	0.150308	0.115244	0.0885705	0.119833	0.608148	0.174166	0.13315	0.181262	0.136719	0.152004	0.203051	0.173637	0.191511	0.0979081	0.0821591	0.131464	0.114074	0.147037	0.125089	0.143215	0.110454	0.136726	0.113576	0.351931	0.143857	0.163942	0.110867	0.221855	0.240954	0.157166	0.0923482	0.127051	0.150159
6684						790.541	422.78	0.343599	1.89618	1.55715	2.04642	1.48981	1.94975	1.68036	2.12591	1.94713	1.94787	2.27805	0.977147	1.74163	2.2889	1.81138	1.54976	1.45411	0.933688	1.70791	1.31468	1.65207	1.96833	1.33558	1.5841	1.70289	1.58276	1.18579	2.11237	2.07186	1.90362	3.16139	1.5355	1.7222	2.18746	2.94805	1.53657	2.50254	1.61484	1.61153	0.739355	1.07187	1.80393
6720						793.578	489.486	0.240055	1.00766	0.797788	0.700026	1.07112	0.869184	0.95561	1.06464	0.960825	0.708195	0.911393	0.919541	0.934497	0.479011	0.951533	1.32756	0.738592	0.459667	0.889088	0.799762	0.839288	1.3429	0.764353	1.21746	0.703078	0.98873	0.839652	0.664175	0.97453	0.809156	1.04231	0.75998	1.01721	0.976928	0.987656	0.716651	1.29286	0.813081	0.928356	0.458523	0.739452	0.901852
8124						885.704	595.761	0.645978	1.74679	1.60691	1.64418	0.959533	1.23167	1.44687	1.5929	2.415	1.3435	1.57264	1.35795	0.948537	1.65228	1.56273	1.39937	1.95435	1.30883	1.11862	1.59211	1.45504	1.55159	1.35711	0.97508	1.1751	1.25053	1.62549	1.26762	1.11276	1.23785	1.45319	1.13011	0.688797	1.93206	1.52951	1.04344	1.83872	1.88343	1.1881	0.789859	1.27827	1.31543
8126						885.698	560.928	0.0656132	0.394766	0.248978	0.433944	0.263412	0.334047	0.338201	0.307971	0.304464	0.385278	0.430312	0.170911	0.248184	0.419247	0.334225	0.312306	0.349065	0.214865	0.27045	0.425061	0.312565	0.511861	0.294165	0.204675	0.236109	0.262755	0.321448	0.32228	0.364533	0.241594	0.344284	0.278632	0.257087	0.353512	0.376205	0.244311	0.58903	0.549201	0.365367	0.147226	0.267413	0.326584
7215						826.558	390.416	2.973	8.6169	5.55071	9.06465	6.93811	7.18305	8.13014	6.97739	8.10724	10.9778	8.83026	3.55182	5.61492	12.0161	7.4157	13.1912	5.4106	4.39973	8.37966	10.4171	7.68731	14.8367	8.03366	7.47168	6.61553	6.38792	10.2223	9.74589	9.274	8.39672	6.87712	8.01492	5.95734	7.58936	7.17922	8.82463	15.2578	18.5114	10.4116	4.09249	9.11453	9.14073
6088						747.516	357.144	1.42131	7.13582	3.66301	6.80467	6.00617	6.86732	5.3624	6.54892	10.1889	7.06082	6.76903	4.1442	5.25942	6.43532	6.09802	7.32191	5.05581	4.53014	5.9055	10.7399	6.16593	10.2848	6.10188	7.66479	7.43852	7.30963	6.41938	8.11135	10.5512	5.64458	6.91329	7.45973	4.25617	9.39553	6.1976	5.97289	8.21354	8.09612	6.42718	2.32148	5.67225	7.02259
5325						696.642	605.929	1.4226	6.28998	1.48444	4.83548	5.12058	5.16294	2.22373	7.04562	7.04746	7.71793	8.41458	4.93389	8.46504	9.74491	6.76817	9.26719	6.27324	4.93792	6.31322	10.4187	6.19438	5.72652	6.50938	5.31882	5.83367	6.6907	4.88108	6.56278	7.80529	4.74364	6.53586	2.72743	2.6777	7.73946	6.54542	2.64843	6.55109	7.646	7.93142	2.87	6.6697	5.73072
5328						696.634	579.986	0.034741	0.0224047	0.00995751	0.00881214	0.00963216	0.00620966	0.00538759	0.0644433	0.0965623	0.0130936	0.0233623	0.0187843	0.0201576	0.0276411	0.0125314	0.0270339	0.0288372	0.0318882	0.0164936	0.0692571	0.0273615	0.0142131	0.0095286	0.0113439	0.0120573	0.00973244	0.0137862	0.0236841	0.0207954	0.0686112	0.0738827	0.00748685	0.026425	0.01496	0.0192685	0.0138767	0.0227229	0.0468434	0.0137512	0.0276405	0.0228703	0.023674
6416						770.533	355.747	0.0257416	0.10984	0.0329819	0.100384	0.0791788	0.0709198	0.103968	0.00673662	0.0535826	0.0344901	0.0856037	0.0418344	0.0818573	0.073831	0.093261	0.00672505	0.181836	0.056928	0.026345	0.0942749	0.068016	0.0793579	0.0808578	0.0680323	0.0804725	0.0925474	0.0830674	0.0590966	0.117271	0.0345716	0.0760186	0.0431754	0.0627216	0.0874563	0.0957254	0.062817	0.0646676	0.0412805	0.0898601	0.0392835	0.0752058	0.0716743
4011						584.517	455.322	1.58908	3.8201	1.86399	2.99384	2.27538	3.34104	2.10872	3.6738	5.31603	3.31457	4.48113	3.28137	3.52646	4.23168	4.24998	4.26099	3.58036	3.41948	3.79387	4.52323	3.48226	3.55485	3.11024	2.19245	3.04762	3.92866	3.15343	2.83016	2.79452	2.75735	2.96613	3.42926	1.94157	3.61413	2.46708	2.69077	3.78604	3.09891	3.86796	2.51472	4.2532	3.09995
7321						833.504	441.964	0.112136	0.194871	0.272961	0.235013	0.180499	0.252182	0.238159	0.232743	0.237327	0.215543	0.241148	0.243887	0.137648	0.170133	0.204337	0.22878	0.233164	0.201079	0.25898	0.251612	0.21711	0.236549	0.227457	0.233183	0.116801	0.20707	0.178454	0.156937	0.221884	0.235262	0.242694	0.173861	0.182133	0.226907	0.159233	0.0923499	0.179686	0.232595	0.145651	0.142806	0.174352	0.188293
6849						801.563	462.987	0.367005	0.82631	0.6899	0.753926	0.795878	0.77582	0.782944	0.845548	0.864848	0.74547	0.781614	0.762153	0.650535	1.00742	0.615758	0.66938	0.821818	0.605846	0.763305	0.891307	0.750839	0.953379	0.719619	0.754243	0.848117	0.765479	0.615518	0.707268	0.98378	0.944769	0.563732	0.618701	1.26796	0.798842	0.653048	0.76518	0.900448	1.06441	0.757295	0.806969	0.580117	0.803444
6110						749.579	421.283	1.6738	2.45168	2.28995	3.064	2.05822	1.90356	1.9557	2.25244	1.64602	1.67739	2.25259	1.68966	2.31908	1.73533	2.08403	2.16367	2.65949	2.35135	2.20092	2.0368	2.12328	2.66711	2.01003	1.57137	2.04969	3.0674	2.18788	1.63249	1.78276	2.78719	1.84616	1.49627	1.17774	1.46562	2.03509	1.95231	2.89575	2.43422	1.88797	2.06879	1.96082	2.04883
6417						770.533	371.827	0.0302194	0.113994	0.0427335	0.10352	0.00647453	0.0767083	0.0438134	0.11906	0.066399	0.0282324	0.252403	0.0332216	0.0685172	0.0821134	0.0825181	0.10101	0.0566137	0.0470347	0.0459	0.109288	0.0754887	0.163062	0.0706282	0.0915113	0.0519172	0.0656948	0.0763463	0.0328414	0.115476	0.0231023	0.0466846	0.0398568	0.0335257	0.048905	0.0140151	0.0533715	0.0669016	0.0330053	0.0756802	0.0350996	0.0604172	0.0599021
6601						784.495	328.469	0.0947448	0.311886	0.430883	0.365372	0.312427	0.455829	0.381912	0.678574	0.867152	0.425559	0.230823	0.278417	0.151745	0.586589	0.427741	0.377261	0.318675	0.163553	0.364414	0.354679	0.378912	0.449346	0.350018	0.574664	0.325376	0.293376	0.244841	0.59309	0.683576	0.406314	0.507844	0.596116	0.328789	0.491268	0.368877	0.301749	0.646103	0.64422	0.403423	0.184387	0.374142	0.438376
5267						692.619	574.169	9.50839	44.4691	30.7098	35.5301	26.5367	29.3372	29.0108	56.2673	67.9886	42.9084	55.203	38.814	45.0928	54.5902	50.3407	55.5807	21.687	33.4439	43.1444	75.0947	42.2629	35.2392	32.8604	20.5316	30.0635	40.2734	25.5681	20.018	3.46038	28.265	38.9185	27.8313	26.6371	68.9748	37.5176	14.7577	28.9501	38.3407	39.1404	18.68	42.8251	30.9426
5266						692.61	551.801	0.0656445	0.408579	0.0858734	0.288957	0.301508	1.99552	0.184277	0.175016	0.614505	0.232726	0.277315	0.18165	0.276803	0.496489	0.257097	2.6867	0.190412	0.35014	0.0813942	4.31593	0.673327	0.547433	0.304451	0.17864	0.269753	0.226607	0.16271	0.183536	0.445984	0.151858	0.200354	0.135715	0.122901	3.7399	0.315231	0.240007	2.78854	0.185059	0.425688	0.17465	0.295987	0.55475
8335						902.59	408.668	0.044061	0.237025	0.192984	0.17098	0.144255	0.172148	0.331148	0.285625	0.299797	0.289605	0.312585	0.175326	0.327013	0.359445	0.268558	0.14912	0.200062	0.2739	0.185344	0.264147	0.234156	0.166602	0.150091	0.191017	0.127277	0.250379	0.170293	0.298132	0.198229	0.264854	0.306294	0.231617	0.308239	0.404545	0.452725	0.167081	0.332005	0.347916	0.257939	0.168214	0.158586	0.247602
8333						902.515	392.27	0.0070224	0.0785402	0.0363701	0.0767594	0.116755	0.0693274	0.0740327	0.0142697	0.0635335	0.0932442	0.0561256	0.0187627	0.0771567	0.250831	0.0840478	0.0396471	0.0854648	0.0519137	0.0519937	0.110513	0.0728156	0.230175	0.0544882	0.0803667	0.185328	0.0777941	0.0796821	0.107635	0.101359	0.0897494	0.0877852	0.0871141	0.0451449	0.0471634	0.101424	0.0682827	0.106228	0.0965367	0.137694	0.0133344	0.078723	0.0938004
5300						694.633	605.867	11.2048	53.7456	28.5404	38.108	41.2751	42.7978	43.3036	56.9205	56.7607	61.7364	68.4869	39.817	66.5868	78.0014	57.6168	73.4401	49.4964	39.2836	52.686	86.1217	52.2965	45.539	51.5119	45.313	46.2086	53.3591	39.5093	52.2496	65.4981	37.5011	55.218	49.4048	48.5771	61.5699	53.4566	44.6213	52.1271	62.8358	62.818	23.189	53.85	50.2179
4966						668.61	574.623	0.979359	4.06191	1.71337	2.94514	2.72902	3.55773	3.14659	4.45021	5.61735	5.34469	5.83818	3.07397	4.29584	6.54861	4.158	4.99939	4.01731	2.7891	4.19397	6.1048	4.02823	4.23248	4.2048	3.48787	3.4307	4.75002	3.10606	3.47098	4.50186	2.9552	3.69935	3.95478	2.86456	4.3746	3.02365	3.00738	4.61379	5.12805	5.09468	2.00932	3.97552	3.79428
4965						668.574	563.306	0.201124	0.578111	0.446968	0.458398	0.4615	0.465749	0.462841	0.91465	0.739869	0.523477	0.784503	0.805164	0.738729	0.792618	0.710088	0.94708	0.493798	0.39897	0.866791	1.07408	0.643225	0.486333	0.481521	0.488428	0.439798	0.559658	0.390267	0.377747	0.488729	0.411538	0.536302	0.416076	0.502973	0.692197	0.442614	0.377578	0.565632	0.488628	0.609723	0.384845	0.686633	0.491361
7625						853.642	474.265	0.488335	2.12941	1.74305	1.85852	1.43234	1.66062	1.92644	1.72663	1.87715	2.03325	2.96796	1.00551	1.60169	2.19368	1.80798	1.77325	1.71633	1.25399	1.9976	2.44647	1.78201	2.23447	1.5328	1.72421	1.8366	1.45178	1.56826	1.76756	2.46851	1.40239	1.98823	1.48126	2.10722	1.91908	2.2673	1.34723	3.41245	2.69606	1.97073	0.890159	1.52176	1.8794
3373						524.278	71.9926	0.748092	3.40394	0.938211	1.48901	1.80931	2.87384	1.71326	3.20063	2.80359	0.551749	4.15837	1.54639	2.50062	2.50996	2.80344	3.40552	1.08729	0.924882	1.11141	3.21771	2.13986	3.35869	2.7044	3.06788	1.94657	2.4911	2.34509	1.55848	3.81164	1.11936	2.44043	1.92276	1.96753	2.68448	3.59361	2.42673	2.96478	1.17734	3.42678	1.06671	2.26948	2.41719
4936						666.603	574.706	8.55048	36.9428	15.7042	25.5325	24.4812	31.8837	28.7378	39.2495	49.3707	47.424	52.5493	27.1868	38.3204	57.8754	37.9557	44.0865	35.7647	24.6689	38.4866	54.6697	35.972	36.6501	35.8951	31.7979	30.0935	41.2621	26.9719	29.5557	41.4641	25.8289	32.7369	34.0734	25.3608	38.0351	26.7782	27.2259	40.4741	45.1426	44.6853	17.2928	36.729	33.4027
4331						612.549	500.319	0.26343	0.708952	0.284812	0.607638	0.44	0.716138	0.467615	0.611837	1.40402	1.0214	0.779404	0.746638	0.572509	1.14569	0.683802	0.666731	0.897283	0.542875	0.815162	0.874366	0.712515	0.94981	0.700893	0.425399	0.644549	0.762833	0.770591	0.510253	0.576999	0.653629	0.40293	0.622196	0.567885	0.724126	0.328259	0.545037	1.25053	0.831058	0.977164	0.591886	0.82753	0.683178
4907						664.587	545.848	1.83766	10.4756	6.14575	7.0715	7.32184	9.19436	8.18671	17.0755	17.4852	11.3145	15.5853	10.6922	11.0835	18.4525	11.039	13.5647	8.92575	6.77049	13.2986	23.8511	11.4686	11.3329	8.28085	9.55931	7.87794	12.1952	6.42384	8.01596	11.4142	7.94428	9.49193	7.66593	8.33014	16.4881	3.93309	7.21712	12.9187	11.5056	11.0558	4.94359	10.736	9.36653
4906						664.562	509.086	0.223624	0.196165	0.0832472	0.14764	0.0702276	0.256404	0.23928	0.206103	0.243674	0.333614	0.214474	0.154115	0.104157	0.315441	0.22438	0.118102	0.155037	0.0743925	0.213814	0.330478	0.195219	0.215437	0.18585	1.09315	0.13712	0.218446	0.0951748	0.136276	0.100792	0.103688	0.106997	0.107682	0.57173	0.152093	0.0833077	0.0510262	0.231643	0.226146	0.11231	0.0813434	0.151972	0.208109
6489						775.597	455.157	6.7939	10.0344	7.08976	12.3558	9.78429	11.0821	9.20857	7.76154	15.8141	12.0896	9.5384	8.15611	6.27513	12.3153	6.88645	7.37812	10.7306	7.60935	8.43398	8.87391	9.41057	16.3383	10.3034	8.06912	10.6772	9.05192	10.8604	9.18117	10.3141	10.8656	7.03276	8.96082	8.28179	8.40119	7.17871	10.4309	16.3988	13.3786	10.8159	10.5511	7.37658	10.2234
3988						582.509	455.327	18.6375	46.4008	23.5744	35.3455	26.3355	39.8248	25.8337	44.1649	61.5176	38.0102	53.1265	39.9314	41.0501	49.5527	50.2644	49.6228	41.5639	37.8612	45.6524	55.1324	41.1701	41.5911	35.7615	26.2164	35.5195	45.0517	37.5285	32.7614	34.5572	33.1571	36.1925	38.3619	23.0815	42.0693	29.6717	31.9807	44.849	36.3136	44.0635	28.7297	51.6526	36.4555
6950						808.514	336.879	0.0696186	0.803666	0.405847	1.2386	0.436875	0.938445	0.941789	0.968738	1.4084	1.18102	1.00434	0.476921	0.258436	1.01884	1.16364	0.723296	0.731686	0.804622	1.28204	0.714212	0.828551	1.80813	0.92096	1.39991	0.974964	0.65924	0.689106	1.37952	1.27467	1.00527	1.05463	1.13087	0.237422	1.50054	0.973073	0.862268	1.63777	1.7917	0.71785	0.288075	0.654983	1.04805
8599						922.577	466.69	3.1479	5.04019	4.39221	4.61015	4.80116	5.17394	4.97357	4.53163	6.66876	5.00085	5.40974	4.79949	3.9131	4.73305	3.75469	4.0297	4.81967	5.05638	4.18697	4.12459	4.65839	4.11659	4.37295	5.1255	4.24522	6.28436	4.81557	4.22075	5.24224	5.21677	4.33537	4.53325	5.18324	5.0775	4.62234	4.62594	4.69269	6.11384	4.5289	4.40229	3.85511	4.78052
8604						922.577	445.073	0.432924	1.37817	0.948541	0.955854	0.933946	0.712803	1.09946	0.993902	1.10551	0.608498	0.703325	0.487564	1.01463	1.42244	0.733888	0.707103	1.12177	0.935677	0.654312	0.999518	0.897492	1.17816	0.981982	0.835658	1.20399	1.28736	1.02008	1.32256	1.13405	1.0968	0.540535	1.09963	1.02332	1.19285	1.3224	1.16284	1.09517	1.29982	1.25659	0.5121	1.26432	1.09151
4305						610.561	522.024	8.15171	11.6846	10.5111	11.2128	10.64	10.3177	10.5806	10.3868	11.3427	10.4617	12.3235	10.1767	11.2881	11.3262	10.3557	11.2672	10.4993	9.90673	10.5103	11.8741	10.7409	11.0212	10.1948	10.9056	10.2583	10.7834	10.4255	10.4701	11.631	10.4658	10.8118	10.3887	10.165	11.3001	10.3953	10.4335	11.1809	11.8301	10.8171	8.34182	9.9386	10.5879
4304						610.54	500.34	3.12133	8.37623	3.59864	6.69761	5.27569	8.43677	5.62337	7.24227	15.3943	11.6705	8.97646	8.81791	6.42488	13.3186	7.87631	7.484	10.1082	6.56302	9.58059	10.3508	8.24688	10.6316	7.87459	5.30217	7.30128	8.16935	8.60127	5.95644	6.9153	7.40258	5.09827	6.92559	6.42288	8.19898	4.10908	6.41172	13.6181	9.96015	11.038	6.89899	9.5143	7.81753
7269						830.607	528.438	0.0480945	0.342768	0.150642	0.89435	0.396054	0.455642	0.397797	0.474297	0.479678	0.240214	0.449703	0.312457	0.255059	0.601113	0.152291	0.346614	0.262501	0.269099	0.311401	0.50958	0.367468	0.469022	0.296824	0.441728	0.334141	0.457203	0.254551	0.49199	0.447501	0.337222	0.516377	0.448993	0.356725	0.427837	0.34694	0.388981	0.508702	0.984146	0.223923	0.202234	0.392314	0.416368
7272						830.602	548.605	0.0352307	0.0588183	0.0447346	0.064335	0.0257136	0.0753231	0.0900174	0.0677336	0.100906	0.0461747	0.0705122	0.0514316	0.0324412	0.0881752	0.0332978	0.116001	0.041902	0.050375	0.0708069	0.0887397	0.0626335	0.097308	0.059558	0.0722387	0.064077	0.0480066	0.0859751	0.0598068	0.0981289	0.0942196	0.0859599	0.135899	0.0647132	0.124021	0.0751234	0.0717028	0.115116	0.142683	0.110678	0.022903	0.0888323	0.0858476
7402						838.558	417.236	0.477721	1.61485	1.46095	2.03711	1.20465	1.36238	1.43251	2.11405	1.98725	2.35076	2.93569	0.731114	1.08337	2.34609	2.01232	1.55611	2.45082	0.981348	2.31466	1.266	1.68599	1.53195	0.733026	2.08224	0.84155	1.93046	0.766444	1.25157	1.14467	2.16413	2.69392	0.95539	2.03939	1.5771	1.59246	1.90638	2.85147	2.30103	2.00758	1.45876	0.834435	1.6332
4639						640.589	553.466	0.239704	0.237881	0.1338	0.34114	0.209194	0.33516	0.202104	0.226855	0.699366	0.472049	0.393311	0.257581	0.398	0.37656	0.368883	0.320963	0.438243	0.277496	0.305429	0.347069	0.329039	0.597864	0.35582	0.221977	0.321841	0.339322	0.194677	0.340316	0.205624	0.547142	0.332313	0.307408	0.171655	0.265616	0.172421	0.308354	0.50309	0.486987	0.32107	0.215539	0.300586	0.325481
6977						810.529	374.186	3.24835	11.4379	11.5277	16.5042	9.77473	15.7988	14.895	12.443	19.473	15.8859	17.4921	7.81219	8.92919	16.0009	11.4463	11.4754	12.9063	10.5219	12.6974	13.6691	12.697	17.6958	11.7056	15.5125	9.92432	12.3254	9.63526	14.3985	16.6552	16.6869	15.7582	15.5591	13.0739	16.4269	11.1847	9.22832	20.8837	17.3975	11.6093	8.58137	9.14184	13.6692
3350						522.283	72.2057	0.0234454	0.317622	0.142631	0.29017	0.229512	0.223688	0.241182	0.26529	0.365472	0.355814	0.525921	0.0737687	0.19219	0.389353	0.18591	0.332103	0.15009	0.135909	0.275341	0.386334	0.255087	0.436451	0.196079	0.586026	0.0921125	0.251327	0.152151	0.282013	0.316505	0.138178	0.433628	0.245016	0.159929	0.364945	0.263179	0.157095	1.02138	0.36723	0.295873	0.031133	0.139435	0.296484
4591						636.556	507.156	0.302699	1.69192	0.460011	1.20322	1.19162	1.34943	1.14654	2.00352	2.38847	1.66074	1.70799	2.15556	1.39884	3.18427	1.75129	1.65001	1.61265	1.1542	2.04	3.09857	1.65758	1.83069	1.24362	1.12738	1.48135	1.75417	1.19998	1.09175	1.43316	1.56818	1.11167	1.12394	2.15432	2.13102	1.07812	1.1412	2.07024	1.92519	1.80341	0.484547	1.90666	1.48303
3986						582.528	479.709	7.67095	9.54058	9.0794	8.63346	8.82297	8.91675	8.9935	8.58335	9.07974	8.5408	9.47992	9.34099	8.98045	8.58958	8.63844	8.25814	8.67901	8.75592	8.58001	9.46904	8.83165	8.10612	8.43769	9.07323	8.51109	8.22048	8.64154	8.04691	8.83077	8.23956	9.0528	7.74257	8.4327	8.85251	8.65335	8.40959	8.28184	8.96373	8.09139	7.74037	9.23086	8.47795
5216						688.527	498.493	3.21361e-05	0.415582	0.212106	0.228401	0.138996	0.206753	0.181161	0.211755	0.460121	0.223814	0.444457	0.193437	0.180982	0.376682	0.283826	0.406409	0.0270688	0.184019	0.177942	0.348016	0.245078	0.50218	0.227275	0.0495375	0.183281	0.334167	0.132703	0.249047	0.248626	0.0248638	0.193903	0.163319	0.263175	0.266125	0.332617	0.0803389	0.299241	0.146874	0.31349	0.537332	0.171975	0.236004
4619						638.571	539.758	1.47973	6.87442	2.66496	4.73046	3.5322	5.66116	3.84337	5.82628	9.59669	8.37285	7.10362	5.71589	4.68756	11.3199	6.21226	5.84157	6.5422	2.04957	6.17164	8.783	5.85047	8.9829	5.99185	4.07724	5.69389	6.81231	5.32503	4.13913	5.17787	5.13917	3.87155	5.03227	2.67886	6.7112	3.90136	4.24489	8.59219	8.10703	6.76227	3.52149	6.35648	5.55595
6928						807.496	412.4	0.31851	0.751156	0.656512	0.577262	0.707764	0.730269	0.743703	0.718501	0.740677	0.680279	0.651805	0.678424	0.657348	0.636904	0.673429	0.657696	0.755451	0.599615	0.746556	0.790154	0.673601	0.582838	0.714728	0.589316	0.668557	0.525466	0.653365	0.592425	0.700502	0.673454	0.658477	0.656951	0.701596	0.698879	0.584337	0.576263	0.693958	0.814583	0.609677	0.517142	0.688354	0.645043
6525						778.561	485.632	1.58731	5.42563	15.8773	5.00151	4.58081	4.75146	5.25135	4.77729	5.35389	4.17927	5.246	5.06677	19.5729	5.5206	5.23865	5.53435	4.86956	14.7379	5.12616	5.33176	6.65152	5.44672	4.64944	5.09986	17.3111	4.33063	4.58549	4.99441	5.6918	4.99027	5.53705	5.0381	18.1043	5.37008	4.89573	4.67735	4.84083	5.35225	5.0884	10.5265	18.6045	7.25674
6010						742.53	426.328	0.657205	1.6612	1.80066	1.836	1.11928	1.52807	1.45472	1.57379	1.74896	1.92479	2.20717	0.888262	1.45302	2.14224	2.53765	3.67117	0.981078	0.85697	2.05894	2.28391	1.71925	1.87093	1.67374	1.34932	1.51942	1.26207	1.49798	1.37805	1.86974	1.25893	1.39829	0.0134981	0.862261	1.69246	1.39986	1.38334	2.17451	2.43906	1.50699	0.825918	1.62747	1.45019
7757						862.594	441.708	0.127444	0.389277	0.395532	0.163121	0.28028	0.28964	0.42222	0.393001	0.578466	0.55643	0.519452	0.323628	0.292854	0.452264	0.427546	0.328371	0.338885	0.285975	0.3659	0.387042	0.365866	0.442778	0.373076	0.676227	0.219568	0.398367	0.308641	0.308185	0.396797	0.335602	0.535361	0.303829	0.294679	0.633579	0.505395	0.374791	0.612078	0.544554	0.716756	0.213303	0.400818	0.429719
7903						872.554	308.409	0.00165852	0.0180023	0.0553358	0.0281641	0.0470146	0.0302318	0.061268	0.0241965	0.0448907	0.0429906	0.0292604	0.0162269	0.0265696	0.050487	0.0584484	0.00816976	0.0475474	0.0388461	0.0218581	0.120392	0.0385779	0.0161162	0.0228943	0.0273992	0.0235663	0.0275328	0.0181531	0.0533881	0.0418312	0.080775	0.028446	0.0178445	0.0866807	0.0445668	0.0242728	0.00794719	0.0280543	0.0515125	0.0207524	0.0104014	0.0140384	0.0323087
7262						830.494	379.057	0.140399	0.461121	0.404114	0.559266	0.375992	0.578736	0.639764	0.518835	0.585958	0.627017	0.509134	0.257804	0.330973	0.590803	0.377033	0.534791	0.361159	0.242269	0.509973	0.603736	0.460444	0.330948	0.512842	0.470485	0.357241	0.305444	0.393032	0.461806	0.517217	0.455091	0.43187	0.535915	0.440824	0.611082	0.433503	0.341136	0.746807	0.749488	0.433336	0.188385	0.355494	0.453597
3963						580.494	414.549	1.84194	5.83461	3.18311	4.01716	3.89169	3.85416	3.66337	7.0541	5.75508	4.11049	6.50893	7.43619	5.96838	6.5176	6.40149	6.54995	5.53833	5.27672	6.2393	6.8581	5.32504	4.84633	3.93599	3.53616	5.05877	6.04933	4.67265	4.18834	4.60072	4.36602	4.59953	4.01007	4.74248	5.93202	3.95869	4.25742	6.1279	4.33636	5.15976	4.90098	6.79136	4.80354
6918						806.591	513.798	7.03933	15.3144	13.191	14.4838	13.5176	14.8467	17.2831	14.7658	18.0037	14.2162	19.368	13.5659	14.5347	18.5317	13.2989	14.2701	15.2305	12.2227	15.34	15.5706	14.7297	17.5212	12.4416	17.6799	11.7801	15.5705	13.9733	15.9409	21.487	16.9	18.2071	14.6694	17.1558	19.7266	15.3332	14.5923	21.1394	17.4558	17.4597	10.3987	12.7423	16.1087
7868						870.546	426.005	4.02512	7.14796	5.36305	6.78613	6.44458	5.86963	5.73867	5.57906	5.87527	6.69415	6.86409	5.16016	5.38118	6.46351	5.66614	6.96478	5.81116	5.77301	5.64616	6.38689	5.98204	6.92687	5.43643	5.48178	5.972	5.29888	6.32427	5.16105	6.98754	5.84444	5.40871	5.486	5.21287	5.63221	5.0234	6.00912	6.19157	7.63524	6.61364	5.51473	6.02359	5.90922
8598						922.57	419.58	0.109863	0.260409	0.191785	0.156652	0.18156	0.176387	0.184016	0.223268	0.300478	0.217987	0.194276	0.225747	0.195167	0.303586	0.190415	0.2184	0.167496	0.154443	0.170264	0.186188	0.200419	0.133195	0.214717	0.172466	0.17019	0.204605	0.173196	0.183473	0.14718	0.209057	0.17728	0.223399	0.185826	0.250083	0.202195	0.165964	0.253079	0.143414	0.168594	0.13526	0.224505	0.186884
7374						836.537	367.778	0.18997	1.08727	1.05531	0.667995	0.69768	1.09131	1.20107	1.1176	0.924606	1.35993	1.56421	1.12949	0.905711	1.67681	1.1189	0.549406	1.29013	0.548431	0.959702	1.24189	1.01887	1.15854	0.994323	1.87117	0.952063	0.586721	0.275187	1.3413	1.43085	0.0639544	1.68528	0.501556	0.878556	0.926112	1.56015	1.08954	2.0404	1.87999	1.81119	0.458915	0.960626	1.12332
7373						836.542	404.966	0.282728	0.419741	1.47727	0.81095	1.06187	1.41561	0.425648	1.66191	0.556322	0.76047	0.914486	0.695077	0.685833	0.571347	0.67228	0.738985	0.519439	1.44031	0.125197	0.815416	0.802544	0.616948	0.634514	0.530234	0.435305	0.562373	0.119181	0.435165	0.0852507	1.10195	0.565315	0.379448	0.399367	0.675436	0.60251	0.497247	0.890249	0.587756	0.472338	0.578758	0.15492	0.516213
6359						766.531	417.846	0.97014	2.97412	2.79168	3.42424	2.69608	3.1992	2.93896	3.23018	4.45958	3.17343	3.12458	2.43093	2.87895	3.24289	2.8353	4.28055	2.53508	2.09101	3.4059	4.20646	3.04446	2.91713	2.60453	2.72534	2.88629	2.81185	2.67055	3.30817	2.95682	3.09181	2.93002	3.57368	2.30523	4.19287	2.53169	2.50782	3.96879	4.21064	2.54446	1.76326	2.64794	2.95744
5599						716.595	531.656	0.0304631	0.116029	0.109528	0.108269	0.140718	0.0732143	0.0769211	0.137874	0.19658	0.0897793	0.14421	0.0674798	0.104792	0.127907	0.117851	0.149962	0.0707644	0.0840989	0.0759509	0.195552	0.110897	0.24813	0.0713706	0.0942816	0.0768515	0.0905674	0.0945119	0.0692847	0.0844018	0.0766297	0.0997374	0.0960995	0.0457721	0.245054	0.104153	0.0697411	0.0960726	0.0609424	0.0589001	0.0466535	0.120244	0.09747
11041						1451.98	596.223	0.141368	0.541534	0.371488	0.455037	0.41287	0.531214	0.5077	0.528382	0.756053	0.497989	0.659328	0.380678	0.406706	0.680162	0.58031	0.663583	0.386587	0.349441	0.487147	0.780197	0.505889	0.70193	0.499404	0.672024	0.368947	0.460057	0.444598	0.504102	0.511202	0.553636	0.590988	0.613833	0.358193	0.629059	0.345634	0.496117	0.712631	0.596154	0.623792	0.275407	0.544213	0.525096
11042						1451.97	581.018	0.0192208	0.0965957	0.0597294	0.107351	0.0912165	0.139035	0.0963956	0.101051	0.0849308	0.137245	0.145576	0.0536993	0.0553631	0.141315	0.093409	0.115114	0.0761778	0.0668982	0.0985568	0.139547	0.0959213	0.180324	0.0762116	0.104011	0.0758479	0.0864028	0.0882419	0.0966362	0.121532	0.089592	0.100604	0.0925635	0.0672414	0.110715	0.0714528	0.0873675	0.165733	0.157447	0.12587	0.0475288	0.0996226	0.102247
6449						772.549	403.841	0.0111798	0.0299924	0.00598337	0.0449592	0.026622	0.0152785	0.327848	0.0372293	0.0182762	0.0961924	0.0439478	0.00788573	0.0360635	0.0153517	0.0275894	0.0264126	0.017907	0.0244621	0.0091954	0.0285302	0.0425453	0.0214073	0.0194691	0.0249647	0.00979488	0.0243501	0.0295189	0.341005	0.0193401	0.0565885	0.054437	0.00965036	0.299741	0.00625879	0.0954848	0.190696	0.00981507	0.0965204	0.0254679	0.0173398	0.0156291	0.0683739
8127						885.602	510.614	0.00892257	0.0461692	0.0093092	0.0175895	0.0108876	0.0124208	0.0148864	0.0162702	0.0209497	0.0297062	0.0211647	0.0115368	0.0197118	0.0160189	0.0641511	0.0348366	0.00913529	0.0233491	0.0198954	0.0390616	0.0222986	0.0295379	0.027375	0.0379989	0.0134676	0.0152151	0.00599134	0.0239679	0.0231376	0.0210582	0.0176803	0.0110036	0.0156916	0.02517	0.0138947	0.0167933	0.0581172	0.0134077	0.0378215	0.00576643	0.0322664	0.0222681
7693						858.667	515.952	0.0352883	0.360582	0.290958	0.494754	0.196821	0.390005	0.321649	0.409779	0.259974	0.469416	0.573308	0.0781499	0.26653	0.560568	0.174583	0.285559	0.337916	0.124706	0.345415	0.534351	0.325516	0.387776	0.252056	0.206459	0.253963	0.336315	0.201551	0.245972	0.492094	0.255526	0.432316	0.282694	0.301421	0.359474	0.381878	0.256681	0.561247	0.525547	0.113484	0.191135	0.04901	0.30433
5696						722.629	605.144	0.0257099	0.0539356	0.0807154	0.0434428	0.0884581	0.0770973	0.0859794	0.0989614	0.210399	0.0823039	0.135052	0.192181	0.0858746	0.0932444	0.197241	0.0934056	0.0541716	0.0562854	0.0620182	0.0993368	0.0957907	0.0827164	0.0750217	0.110271	0.0400119	0.0419761	0.0842927	0.129228	0.174994	0.0872805	0.0851987	0.0737418	0.0947716	0.135181	0.102003	0.0779682	0.167856	0.0889862	0.126115	0.0478997	0.0863335	0.0955924
5602						716.619	550.704	0.146115	1.23697	0.645073	1.13008	0.69955	0.902423	0.873788	1.00488	1.02811	1.13336	1.27374	0.605994	0.83708	1.62725	1.26806	0.990174	1.11855	0.627819	0.525322	1.49421	0.958428	1.28998	0.772244	0.611944	0.778095	0.890069	0.810163	0.884866	1.00908	0.725513	1.05857	0.742675	0.777268	1.10433	1.05512	0.73779	1.7268	1.68479	1.16314	0.40161	0.879795	0.955192
6498						776.525	390.979	0.0109798	0.22911	0.115667	0.177192	0.0920681	0.229113	0.318257	0.271597	0.448073	0.352614	0.490154	0.0893496	0.18947	0.549282	0.186821	0.198346	0.0831562	0.0764395	0.284994	0.292553	0.234262	0.171404	0.195125	0.201354	0.0965076	0.16322	0.137323	0.169633	0.259213	0.157416	0.1862	0.197559	0.173139	0.38896	0.276439	0.0980247	0.424549	0.484779	0.19153	0.0323053	0.150798	0.207774
7335						834.527	366.027	0.759488	3.72005	4.37409	2.99699	2.85486	3.82228	5.31077	4.44904	6.01377	5.33868	6.43277	3.88838	3.76997	6.36468	4.72826	3.88425	5.69043	2.83672	3.98926	4.1936	4.27092	6.70939	4.22861	8.42471	4.17083	3.59492	3.37733	4.56208	5.55541	4.1021	7.78093	4.04904	3.51146	5.5596	5.68042	4.79741	8.10817	6.65878	7.05002	2.74652	4.26728	5.24675
7336						834.506	341.14	0.0163567	0.140306	0.129128	0.0729568	0.0876342	0.100359	0.194922	0.259665	0.32163	0.252422	0.227591	0.170866	0.135305	0.289756	0.20269	0.140559	0.249038	0.0985815	0.143445	0.213383	0.17233	0.210608	0.176322	0.315038	0.148712	0.10229	0.174204	0.221485	0.186002	0.162252	0.314939	0.194388	0.102847	0.424975	0.347492	0.230283	0.400404	0.434731	0.305552	0.0241975	0.191423	0.233407
6765						796.549	521.448	1.30557	2.1728	1.80976	2.42365	1.99182	2.42687	2.0591	2.16487	3.16538	2.18109	2.68069	2.67429	1.90829	2.51369	1.94758	2.97036	2.00367	1.89239	2.38126	2.86591	2.27695	3.47805	2.06232	2.37815	2.11377	2.30577	2.24562	2.11325	2.37394	2.57005	2.09726	2.10163	1.67142	2.98725	1.6449	2.23316	2.73562	2.78864	2.28227	1.65276	2.07985	2.29578
6533						778.551	414.482	0.489331	1.00642	0.495699	0.920647	0.563367	0.323421	0.590854	0.765653	0.853302	0.373224	0.841459	0.676347	0.860594	0.827887	0.722412	0.945173	0.713796	0.602277	0.656768	0.852568	0.70406	0.926171	0.5398	0.633051	0.789121	0.95144	0.661498	0.673294	0.716781	0.660103	0.799784	0.695243	0.527636	0.927651	0.601217	0.73203	0.787719	0.770607	0.636613	0.689208	0.747259	0.723311
6528						778.538	386.185	0.0415114	0.244244	0.0866981	0.294882	0.225953	0.171677	0.136287	0.333081	0.253374	0.132871	0.392788	0.144093	0.194987	0.275193	0.220287	0.286627	0.165911	0.177134	0.107527	0.372415	0.212877	0.416655	0.241419	0.328942	0.106569	0.219778	0.218683	0.0870247	0.263625	0.0822198	0.145323	0.100505	0.111328	0.190446	0.143446	0.138644	0.193708	0.124594	0.227037	0.110106	0.145101	0.179758
6340						765.537	434.858	0.372884	1.24449	1.2291	1.87079	1.43664	1.65041	1.97255	1.61946	2.00436	1.70833	1.59074	1.01381	0.584305	2.01303	0.494894	1.91548	1.83346	1.50949	1.82474	2.64979	1.52694	0.864236	1.25451	1.59344	1.18329	1.24879	1.36828	1.60995	1.79006	1.93909	1.99585	1.66935	1.54828	1.81552	0.36306	1.39372	2.22259	2.45955	1.58233	0.973676	1.04242	1.4959
5490						708.649	619.284	0.278334	1.83163	0.381669	1.26689	1.47717	1.51029	1.28951	1.92697	1.62387	1.74704	2.21872	1.5022	2.58319	2.47591	2.07324	3.4899	1.37643	0.92006	1.54123	2.53499	1.70246	2.08115	1.75338	0.662269	1.48716	1.66322	1.6034	1.6396	1.99744	1.04673	1.68898	1.53432	1.55124	1.44896	1.4546	1.30027	2.23393	2.03467	2.2073	0.554988	1.32397	1.56338
6555						780.584	512.178	0.569125	1.33787	1.54992	1.91975	1.234	2.70414	2.14297	2.10618	3.61009	2.13576	2.58343	1.71212	1.96126	2.15194	1.461	2.09946	2.46963	1.70196	2.01715	2.84183	2.01548	2.28697	1.51762	2.25165	1.3823	1.93998	1.15872	1.76602	2.2245	2.61318	2.2192	1.78121	2.10545	2.76066	1.5595	1.366	2.82966	6.03809	1.63052	1.30648	1.06525	2.09015
6683						790.529	391.504	0.0853569	0.682711	0.421238	0.826772	0.561428	0.582079	0.90789	0.900519	1.17569	0.9434	0.899124	0.314974	0.765135	1.81313	0.60976	0.741512	0.574458	0.420339	0.778664	1.50113	0.775266	0.664283	0.622976	0.64846	0.617243	0.533515	0.50004	1.06243	1.1492	0.79098	0.682398	0.857319	0.840723	1.33558	1.45459	0.549488	1.83919	1.69929	0.782404	0.219261	0.525183	0.868728
6889						804.581	544.683	0.281469	0.737818	0.56025	0.684322	0.503249	0.72734	0.464446	0.590524	0.589473	0.450017	0.577516	0.722332	0.695879	0.542972	0.723941	0.880966	0.732136	0.674248	1.56567	0.591567	0.664807	0.474994	0.571292	0.460655	0.481292	0.539457	0.474004	0.394304	0.522182	0.495542	0.575625	0.42982	0.413183	0.687733	0.409893	0.454955	0.52216	0.485896	0.526015	0.409473	0.678469	0.500347
6797						798.556	521.848	0.200476	0.342294	0.282853	0.363753	0.380869	0.404847	0.356044	0.337708	0.453307	0.345437	0.405338	0.369987	0.310272	0.440031	0.326818	0.460496	0.337309	0.31239	0.394235	0.435923	0.363019	0.507603	0.364392	0.43268	0.308556	0.360587	0.399953	0.308162	0.405456	0.3918	0.344614	0.311512	0.313152	0.477937	0.282308	0.343537	0.478973	0.470681	0.354244	0.245726	0.371748	0.373681
6702						792.508	435.633	0.298532	0.562381	0.393122	0.25195	0.580498	0.550975	0.604324	0.43266	0.475694	0.360612	0.489754	0.543396	0.506345	0.460006	0.289912	0.485867	0.588593	0.399629	0.549997	0.242459	0.453335	0.612074	0.512446	0.599087	0.553366	0.516405	0.552468	0.445025	0.603514	0.656949	0.318041	0.530082	0.532916	0.438733	0.282352	0.534372	0.613196	0.434265	0.555082	0.477591	0.597116	0.518254
4876						662.501	526.818	0.0018136	0.00710535	0.00688743	0.0106075	0.00552654	0.00883059	0.0187206	0.00687795	0.00845146	0.00967791	0.0147635	0.0040428	0.00574145	0.0195489	0.0162934	0.00328207	0.00729255	0.00779315	0.00909193	0.0149032	0.00936259	0.00521614	0.00897519	0.00226314	0.00785014	0.00614315	0.0101135	0.00939928	0.00114019	0.0125094	0.00887738	0.0039612	0.00845233	0.0137703	0.0132273	0.00435712	0.0161383	0.013784	0.01621	0.00593815	0.00770972	0.0088018
5240						690.596	514.348	0.0554927	0.419277	0.278407	0.3652	0.313342	0.333551	0.278488	0.453986	0.42216	0.426033	0.542499	0.296894	0.399145	0.675352	0.548722	0.453098	0.384891	0.26484	0.51695	0.702948	0.406564	0.411345	0.335478	0.258018	0.312626	0.397235	0.283156	0.328981	0.405077	0.286894	0.354258	0.284439	0.341558	0.424302	0.312177	0.257097	0.595277	0.510528	0.447972	0.194277	0.378135	0.355942
7123						820.607	540.441	0.0354709	0.157852	0.0801427	0.187021	0.156979	0.20465	0.144215	0.164849	0.110337	0.0815133	0.12309	0.0901432	0.0889589	0.217813	0.107654	0.132557	0.0858833	0.0649608	0.0924481	0.0789233	0.120273	0.28535	0.082189	0.165274	0.0707706	0.200915	0.197793	0.0929819	0.123092	0.196832	0.111753	0.0976316	0.196411	0.113205	0.132177	0.0931673	0.254686	0.123866	0.143211	0.0544182	0.0749904	0.140536
7116						820.585	503.368	0.0889121	0.471343	0.827681	0.418959	0.178996	0.549288	0.309895	0.648403	0.650529	0.655669	0.924969	0.845498	0.28147	0.390088	0.497547	0.540117	0.436022	0.259837	0.808059	0.617848	0.520057	0.528856	0.346488	0.720195	0.348246	0.364866	0.258671	0.273434	0.427357	0.548306	0.696243	0.592042	0.309739	0.899956	0.326214	0.342015	1.01543	0.450389	0.138686	0.125592	0.333983	0.452335
10989						1427.99	610.235	0.0045993	0.0465587	0.0428909	0.0233559	0.0571658	0.0406698	0.081384	0.0875167	0.106923	0.0431963	0.0697574	0.0503602	0.0759212	0.0705746	0.0629356	0.0611794	0.0527798	0.052769	0.0673455	0.16417	0.0631027	0.076941	0.101402	0.122009	0.047356	0.0578771	0.0589844	0.0670103	0.072585	0.0863539	0.076164	0.0543691	0.0682381	0.0938804	0.0728074	0.0298309	0.100992	0.120893	0.058736	0.0329043	0.0572968	0.0728315
7226						827.562	413.658	19.7617	53.8117	49.5278	49.7085	54.2066	64.2262	54.2302	54.1841	78.6373	59.8189	59.0297	50.742	46.9476	59.0211	44.5059	53.3725	52.7452	47.9369	48.9962	68.5668	53.4988	52.8975	50.2593	59.3891	49.5839	51.4407	45.8145	55.1758	65.3148	55.359	56.1091	59.588	51.8974	68.8956	45.6809	47.0396	58.1974	59.9936	46.604	35.9242	46.8519	53.1008
7983						876.564	367.1	0.213336	0.795012	0.645941	0.610479	0.651563	0.818225	0.773968	0.904299	1.32568	1.01218	1.02152	0.700468	0.51819	0.957309	0.675085	0.771289	0.593562	0.602604	0.739995	1.12004	0.772537	0.773261	0.773646	0.877185	0.661755	0.715181	0.8021	1.06671	0.78057	0.901567	0.947957	0.968041	0.738098	1.45554	0.864045	0.755673	1.25137	1.42425	0.677034	0.403306	0.70178	0.876954
6364						766.536	355.524	0.0359666	0.184329	0.0134731	0.13868	0.129924	0.106365	0.053219	0.41173	0.00428987	0.00604594	0.177463	0.0474934	0.0955438	0.0536872	0.116033	0.134486	0.0733713	0.0703307	0.0173427	0.148366	0.100907	0.165013	0.123837	0.111446	0.071868	0.252898	0.104976	0.03634	0.331067	0.0211775	0.052721	0.0386002	0.0750698	0.101639	0.118672	0.0943612	0.0736924	0.018883	0.080627	0.0438936	0.0629823	0.0989882
4741						652.57	522.469	0.022675	0.0332515	0.0133759	0.0487219	0.0455004	0.0411322	0.0490585	0.0565135	0.0304955	0.0340437	0.0509386	0.0306568	0.0503991	0.0524228	0.0492951	0.0363094	0.0369561	0.0411096	0.0344278	0.0209517	0.0389118	0.0360642	0.0267891	0.0506901	0.0334556	0.0387024	0.0346984	0.0391647	0.0457	0.038003	0.0204645	0.0347876	0.0455491	0.0314074	0.0464029	0.0407807	0.0339305	0.0344734	0.0463439	0.0189075	0.0356675	0.0365991
6433						771.507	263.682	0.0239577	0.100892	0.080209	0.164912	0.0746262	0.0854031	0.065081	0.0702004	0.0568024	0.0965594	0.211856	0.0207109	0.0401647	0.0526465	0.0598426	0.0801392	0.0410648	0.0500351	0.0564482	0.154394	0.0792972	0.0929243	0.0666059	0.0650113	0.0303296	0.0520372	0.0494367	0.047042	0.106124	0.0530188	0.0635395	0.0519224	0.0564499	0.0543534	0.0570507	0.0424733	0.115087	0.119462	0.0563596	0.0264482	0.0453019	0.0625489
7943						874.579	513.935	1.84692	3.34517	2.78758	3.13752	3.1052	3.16806	3.93364	3.33729	4.00529	3.06355	4.06997	3.10016	3.22565	3.71184	2.98678	2.98989	3.2647	2.78897	3.26939	2.94526	3.20414	3.20634	2.65143	3.5461	2.67332	2.87407	3.06851	3.241	4.45557	3.83627	3.73522	3.12875	3.55705	3.89437	3.2134	3.23586	3.96234	3.41962	3.71135	2.34221	2.91742	3.33351
7941						874.512	499.317	0.118982	0.27121	0.209678	0.25021	0.220043	0.276457	0.276452	0.285833	0.300479	0.231977	0.345192	0.192304	0.247465	0.335906	0.27203	0.273294	0.243603	0.17299	0.251463	0.324496	0.255003	0.259128	0.226939	0.260337	0.246363	0.269298	0.225639	0.22376	0.273111	0.261327	0.26486	0.24048	0.189248	0.3104	0.26185	0.220252	0.321321	0.328764	0.269669	0.141232	0.274425	0.25342
6885						804.517	452.693	0.0796372	0.205948	0.164231	0.123166	0.284007	0.218338	0.216197	0.188824	0.259157	0.179227	0.125037	0.294935	0.21631	0.252623	0.173842	0.327514	0.206523	0.156076	0.19593	0.121615	0.199457	0.389684	0.263306	0.235886	0.213616	0.307479	0.299202	0.157356	0.097799	0.248361	0.158572	0.165644	0.315392	0.121765	0.165856	0.210408	0.217912	0.232046	0.23166	0.143349	0.137472	0.215638
6886						804.577	464.732	33.3985	52.9881	43.2569	47.1359	40.9963	39.5234	41.1909	47.8466	51.9983	39.0843	61.5771	43.6195	50.812	51.6115	50.4562	58.8091	49.6239	45.0171	45.9112	54.0906	47.4474	53.8618	38.1482	46.3528	45.1262	55.0664	37.8278	40.2434	43.8349	46.7147	51.8904	38.6061	33.8645	54.9878	42.912	40.8992	53.3413	48.9193	48.9649	36.3237	49.5879	45.3737
9061						964.641	603.326	0.00871163	0.0441918	0.0104628	0.0431343	0.0145062	0.0434865	0.0374272	0.0325093	0.0188189	0.0252558	0.0601615	0.014378	0.00672448	0.03847	0.0404012	0.0376184	0.0143405	0.0316749	0.0289791	0.0454171	0.0298335	0.0511698	0.0170706	0.0143886	0.0165581	0.0220313	0.0346536	0.0376452	0.0231401	0.0216682	0.0536193	0.0209793	0.0316149	0.0325872	0.0171804	0.0206587	0.0931844	0.0392551	0.0100868	0.0107034	0.0212534	0.0294724
5626						718.623	549.826	0.00715262	0.129928	0.0529725	0.127447	0.0686082	0.0893025	0.0854961	0.0957535	0.107313	0.127681	0.122995	0.0545565	0.085996	0.176285	0.143484	0.115732	0.112834	0.0676835	0.135049	0.160994	0.103363	0.144544	0.101981	0.0544513	0.074704	0.0990153	0.0787845	0.0962139	0.105349	0.0769615	0.116148	0.0616875	0.0809347	0.10266	0.120781	0.0857042	0.20319	0.184307	0.12673	0.0401667	0.0994486	0.102688
5051						676.6	539.863	0.0837571	0.314355	0.122302	0.206049	0.161762	0.244784	0.17887	0.24924	0.378601	0.31995	0.271105	0.231874	0.221434	0.409787	0.243109	0.244218	0.302803	0.201079	0.256732	0.29448	0.246815	0.296751	0.255275	0.162671	0.26093	0.290167	0.255903	0.200103	0.199566	0.239221	0.159907	0.244202	0.282527	0.266572	0.180387	0.197493	0.328043	0.33636	0.285003	0.160174	0.257419	0.242934
5048						676.588	526.961	0.0496729	0.383817	0.184265	0.314914	0.248288	0.340231	0.199598	0.41787	0.410768	0.364379	0.410094	0.297245	0.425475	0.657417	0.455841	0.550849	0.270366	0.160624	0.430861	0.593137	0.358286	0.397805	0.302353	0.242825	0.254888	0.384631	0.261686	0.23761	0.266561	0.241835	0.284321	0.244919	0.274006	0.374222	0.248615	0.215567	0.47524	0.39864	0.326575	0.134434	0.290811	0.292877
7949						874.593	542.558	0.193475	0.376358	0.368362	0.693129	0.404863	0.582341	0.536323	0.495833	0.411625	0.434477	0.468503	0.350627	0.379223	0.47939	0.384712	0.40626	0.517391	0.365116	0.603291	0.606946	0.452912	0.815984	0.774277	1.07632	0.341205	0.429867	0.824776	0.502622	0.621679	0.601384	0.442728	0.711053	0.580704	0.679069	0.313992	0.427558	0.650703	0.657559	0.811985	0.710491	0.842747	0.640835
4349						614.357	370.659	0.0895008	0.661497	0.608001	0.626584	0.0279179	0.693428	0.71362	0.65412	0.652976	0.632718	0.739786	0.521024	0.523705	0.721806	0.708488	0.606299	0.0819521	0.467092	0.710693	0.619477	0.553034	0.707523	0.664311	0.715015	0.615532	0.534251	0.307939	0.6318	0.838217	0.678015	0.819518	0.614481	0.581965	0.709273	0.61202	0.614255	0.497094	0.849921	0.504625	0.417278	0.584992	0.624901
4347						614.357	348.653	0.167961	0.651947	0.757143	0.607471	0.565899	0.939469	0.709168	0.58566	1.13672	0.664229	0.964712	0.501522	0.529672	1.01935	0.561672	0.694301	0.601208	0.482249	0.868516	1.18237	0.709562	0.756139	0.536624	0.758572	0.578947	0.595213	0.772785	0.479325	0.712604	0.758456	0.696079	0.65391	0.691215	0.734573	0.64531	0.842253	0.72291	2.48406	0.637059	0.322289	0.553711	0.746601
1695						337.906	1069.94	0.0259639	0.0135304	0.0313174	0.030978	0.0322476	0.0228422	0.0158969	0.0287691	0.0234701	0.0183476	0.0142669	0.0212456	0.0515897	0.0230041	0.0335013	0.0230664	0.0239193	0.0260847	0.0270188	0.0256754	0.0256368	0.0531218	0.0227182	0.0204618	0.0286606	0.00692581	0.0240408	0.0265281	0.0184505	0.0355131	0.0279136	0.0216378	0.043426	0.018776	0.0363611	0.00661378	0.0223894	0.0196382	0.0188557	0.0289054	0.0185328	0.0249735
1100						248.973	1068.9	0.657985	1.20738	2.02624	1.09056	1.20323	1.07707	1.04046	1.00711	2.31922	1.11387	1.41274	1.49101	1.12546	1.64496	1.24159	1.16657	1.84882	1.09407	2.72443	2.21313	1.43529	1.66477	1.06256	2.40703	1.15425	1.11425	0.835706	1.0632	1.20761	1.91194	1.09798	0.646969	0.886277	3.65847	1.11408	1.04656	4.04884	1.1382	1.00641	1.16322	0.369172	1.42988
3196						514.892	1068.24	0.0131084	0.015684	0.0140028	0.0205211	0.0132085	0.0130556	0.0193838	0.0158025	0.0139547	0.0140197	0.0179622	0.00909545	0.0183958	0.00731139	0.0105059	0.0251958	0.0179072	0.0140888	0.0100738	0.00614263	0.014471	0.0253885	0.0149542	0.0124477	0.0172288	0.0189247	0.00968724	0.0137036	0.0252451	0.0102866	0.0128197	0.00810965	0.0105748	0.0171306	0.0104812	0.00763585	0.0107935	0.0128775	0.0183355	0.02627	0.0146795	0.0148787
1394						304.914	1066.12	0.0253346	0.0329601	0.0542721	0.0425444	0.0320899	0.0287299	0.0303609	0.0298797	0.00695563	0.0249618	0.00896148	0.0282654	0.0309248	0.0281657	0.0248747	0.035385	0.031519	0.0530292	0.0283434	0.0280629	0.030281	0.0308209	0.0575248	0.021787	0.0301632	0.0262158	0.0393567	0.0245435	0.0315777	0.0303341	0.050298	0.0305977	0.07018	0.0344662	0.0420192	0.0263834	0.0312222	0.0315157	0.0465724	0.015505	0.0336699	0.0352377
301						134.865	1065.75	0.0190344	0.0493654	0.047292	0.0416258	0.0668887	0.0419741	0.0474422	0.0691017	0.0576999	0.0723663	0.11994	0.036769	0.0480745	0.0620461	0.0494004	0.0975908	0.0563959	0.0112828	0.0447221	0.0671515	0.0553082	0.0333206	0.0296092	0.0389961	0.066727	0.140612	0.0563927	0.0219617	0.0666168	0.0599625	0.0458388	0.04921	0.0473124	0.0416647	0.0513922	0.0404164	0.0425697	0.0389118	0.0673222	0.0168725	0.04988	0.0502795
247						125.9	1063.87	0.0435655	0.0525067	0.0478216	0.0553837	0.0591359	0.0404497	0.0315901	0.0588511	0.115456	0.0106152	0.0469508	0.0502896	0.0467907	0.0429127	0.108952	0.0546621	0.0432	0.0488877	0.0538349	0.0581238	0.053499	0.0561058	0.0489368	0.0516948	0.0745765	0.042049	0.0972823	0.0809445	0.0616727	0.0446948	0.0455235	0.0376225	0.043112	0.132942	0.0457326	0.0829417	0.00887228	0.0767357	0.0285099	0.0526009	0.034451	0.0573501
2587						446.906	1063.24	0.0815382	0.0277733	0.0147032	0.0247408	0.0225529	0.022872	0.022684	0.027295	0.0243658	0.0140583	0.0255264	0.0230695	0.0272156	0.022942	0.0227189	0.0244661	0.0271243	0.0244614	0.0159712	0.0209617	0.025852	0.0343587	0.022129	0.0245795	0.0238298	0.0239772	0.0227309	0.0216627	0.0208927	0.0236552	0.0210555	0.0246347	0.0228584	0.0251076	0.0225262	0.0215224	0.0177183	0.0243842	0.0283069	0.0233142	0.0230336	0.0236139
590						171.957	1063.17	0.0440202	0.0369002	0.0265119	0.0333807	0.043566	0.0159334	0.062381	0.0274492	0.042693	0.0394032	0.100307	0.0351133	0.0383246	0.0831091	0.0378685	0.0385783	0.0186221	0.0463152	0.0191983	0.0436312	0.0416653	0.0399222	0.0357543	0.0347639	0.0431975	0.0220643	0.0106461	0.0305949	0.0269614	0.0365634	0.0442093	0.0264887	0.0403192	0.0386295	0.0822049	0.0261456	0.0335188	0.0402566	0.0459827	0.0546978	0.0522272	0.0382574
1714						339.904	1061.61	0.0219935	0.00960643	0.0147504	0.0191333	0.0187628	0.00599016	0.0107784	0.0294566	0.0151223	0.00827741	0.0164639	0.0105531	0.0148558	0.0113876	0.0156578	0.0134437	0.0452625	0.0163276	0.0164251	0.0140128	0.016413	0.0132758	0.0142579	0.0099395	0.0143102	0.0107208	0.028918	0.0155628	0.0170066	0.0133424	0.0159017	0.0273505	0.0118682	0.0124433	0.0111957	0.0128389	0.00688935	0.00842284	0.0317651	0.00967485	0.0149025	0.0150293
812						212.834	1053.92	0.022259	0.015001	0.0799336	0.0263626	0.0314345	0.0304417	0.0164073	0.0252633	0.0333306	0.0293787	0.0285677	0.0283246	0.0255537	0.0572706	0.0139531	0.0258784	0.0294898	0.0336378	0.0220445	0.0257278	0.030013	0.027595	0.018508	0.0386195	0.0240294	0.00374781	0.0523427	0.0157242	0.0222848	0.0111713	0.0364799	0.00339868	0.0336405	0.0245233	0.0373134	0.0214047	0.0615204	0.0270676	0.0290046	0.0190553	0.0238109	0.0265621
3722						556.88	1048.1	0.0296149	0.115125	0.0344232	0.0360239	0.046186	0.0436273	0.0229104	0.0466019	0.088114	0.0334463	0.0514915	0.0282244	0.0261287	0.0244928	0.0324533	0.0233193	0.042447	0.0382127	0.0393988	0.0566287	0.0429435	0.0556873	0.0341773	0.0286509	0.034991	0.045247	0.0367538	0.0285494	0.0369777	0.0307061	0.0340678	0.0342759	0.0227834	0.040881	0.00661331	0.0356722	0.0427462	0.0196302	0.0558131	0.0401507	0.0337872	0.0349081
236						123.902	1042.22	0.147557	0.306003	0.104399	0.177377	0.180148	0.159087	0.189554	0.293744	0.189214	0.167072	0.169864	0.0152689	0.16449	0.242516	0.477784	0.146808	0.144383	0.0280894	0.122766	0.1578	0.179196	0.129677	0.298183	0.124722	0.193697	0.122942	0.147642	0.128745	0.140656	0.244294	0.156399	0.124573	0.321552	0.207638	0.0360571	0.109838	0.266932	0.120071	0.143488	0.128727	0.529975	0.18379
1694						337.906	1040.82	0.0379221	0.00945211	0.0175972	0.0570651	0.0333187	0.0468369	0.0268944	0.0160669	0.047786	0.00357172	0.0394401	0.0184103	0.0310752	0.0437638	0.0460645	0.0371092	0.0317417	0.0718083	0.0253977	0.0339094	0.0337616	0.0235611	0.047005	0.0299114	0.0289957	0.0254567	0.0281269	0.02317	0.0336451	0.0357355	0.0496379	0.0103495	0.02978	0.0317913	0.0299367	0.025552	0.0452764	0.0322587	0.0290612	0.0291547	0.0200204	0.0304213
2378						420.906	1040.3	0.0336527	0.038563	0.0376654	0.0378217	0.0602952	0.0215008	0.0295486	0.0389521	0.039327	0.0386038	0.0066081	0.0260601	0.0414896	0.0401232	0.00761386	0.0852883	0.0586533	0.0410919	0.114604	0.0367762	0.041712	0.0395281	0.0298128	0.0252736	0.0399339	0.0409106	0.0453131	0.0330138	0.0392555	0.0071194	0.0354088	0.00492319	0.0227552	0.0390923	0.0390003	0.0320741	0.048562	0.0410106	0.0533747	0.0466253	0.0594878	0.0361238
1103						248.973	1036.15	1.57738	5.12147	2.5166	6.1202	0.194263	0.653824	1.72206	1.87093	1.71225	1.41087	2.17412	1.27277	1.35726	2.36	1.81392	1.68969	2.35298	2.08744	2.70171	1.36024	2.1035	0.732777	1.52123	3.37649	1.80405	2.00979	2.20876	0.971214	1.30622	2.25161	1.35357	1.55444	1.49005	2.62026	1.09376	1.36358	1.27226	1.67443	1.82634	1.13614	2.76943	1.71682
703						189.008	1030.64	0.137193	0.147053	0.123703	0.092146	0.165089	0.0265737	0.132316	0.147673	0.123414	0.330884	0.19065	0.186564	0.11998	0.196524	0.185339	0.363254	0.244668	0.225648	0.136165	0.115424	0.169513	0.25655	0.136803	0.120305	0.0990115	0.124232	0.343743	0.148591	0.0925875	0.150094	0.0610133	0.222959	0.0695573	0.116943	0.106752	0.603549	0.116077	0.216884	0.383145	0.122802	0.224072	0.185784
299						134.865	1025.96	0.0405806	0.0408608	0.0473448	0.0587755	0.0630099	0.0668618	0.14207	0.0584692	0.04973	0.113945	0.0522203	0.0750687	0.0413778	0.122619	0.0389473	0.0503955	0.105509	0.0467914	0.0506011	0.107075	0.0686126	0.0475744	0.0676147	0.0409845	0.0393308	0.0243726	0.00646035	0.0277599	0.0420008	0.0911529	0.0506978	0.032906	0.0460137	0.197003	0.0785752	0.0226989	0.0427835	0.0570109	0.064334	0.0759608	0.0481992	0.0551717
166						114.936	1024.2	0.0333975	0.0421769	0.00638598	0.0506348	0.059594	0.0107222	0.00724481	0.0489198	0.0471061	0.0273889	0.0495778	0.0714876	0.0924109	0.0503575	0.0746623	0.0258566	0.050581	0.0452798	0.0367852	0.0246833	0.0427626	0.0426068	0.039588	0.0300704	0.0850025	0.0423937	0.0760977	0.0392761	0.0991696	0.0980352	0.0391863	0.07543	0.00594812	0.0322188	0.11886	0.0425386	0.037917	0.0508166	0.122738	0.0342151	0.0514262	0.0581767
1104						248.973	1018.92	1.04267	1.64651	2.97948	1.13998	1.79442	1.57274	2.23356	2.36337	0.312527	1.52935	3.08732	1.61069	1.32916	1.83518	2.29553	1.92591	1.59103	5.3854	3.75399	1.43444	2.04316	2.63611	3.37981	2.50883	3.12121	1.11657	3.11598	2.43445	1.51213	1.8029	2.35667	2.17509	3.1485	2.40223	2.20992	2.3256	2.57929	2.74044	1.27693	1.37897	1.84449	2.30331
809						212.834	1014.12	0.0174902	0.00722483	0.0414607	0.0283245	0.0268864	0.00342328	0.0281166	0.0456547	0.0393326	0.0365112	0.0405246	0.0291032	0.0314987	0.0251231	0.0437829	0.0169525	0.0216493	0.0261969	0.00463235	0.0257619	0.0269825	0.0237325	0.0417937	0.0162329	0.0259009	0.0389467	0.026418	0.023912	0.00433762	0.036631	0.0203795	0.0210297	0.0187368	0.0335741	0.027069	0.0138176	0.0276151	0.0345791	0.0231005	0.0222945	0.0267013	0.0253401
251						125.9	1011.78	0.037597	0.0490242	0.0584444	0.0761936	0.0515772	0.0423891	0.0312977	0.0516565	0.0841133	0.00917758	0.104483	0.0450118	0.0701007	0.0573324	0.0934473	0.0393273	0.0634607	0.0739947	0.0308727	0.0578318	0.0563666	0.110634	0.108259	0.0592397	0.0773566	0.0431581	0.104635	0.0517114	0.0397357	0.0511231	0.0548341	0.0550048	0.0466119	0.0632463	0.0515588	0.0541246	0.0542212	0.0588807	0.0445111	0.0638473	0.0131356	0.0602914
3189						514.893	1009.85	0.0312121	0.0818959	0.0285467	0.0390786	0.016425	0.0276226	0.0437814	0.0235027	0.0308666	0.0439335	0.0391861	0.018282	0.0312781	0.0301211	0.0140795	0.0405284	0.00679253	0.00764986	0.0260916	0.0232153	0.0302045	0.00350867	0.0338321	0.0204361	0.0376936	0.0269963	0.0145403	0.0410008	0.0393614	0.0347297	0.0187607	0.0261111	0.0317745	0.044888	0.0228834	0.0139054	0.0141844	0.0735664	0.0655068	0.0171526	0.0186185	0.0299725
1396						304.914	1009.09	0.0443433	0.0386182	0.0501388	0.0420499	0.0911147	0.0333728	0.0384969	0.0363511	0.0764675	0.00785007	0.037493	0.0344531	0.0344961	0.0463258	0.0561616	0.0518237	0.037527	0.0300591	0.035563	0.0366147	0.042966	0.0355497	0.0605605	0.0429389	0.0357486	0.0356445	0.034567	0.0336752	0.0385934	0.0373277	0.0110329	0.0349032	0.0368145	0.0354861	0.0468311	0.031582	0.0331802	0.035758	0.0202613	0.0340792	0.0394916	0.0357013
661						182.921	1005.54	0.0280053	0.0642855	0.038815	0.0282711	0.0245645	0.0275363	0.0625569	0.0334672	0.0344254	0.0328278	0.0412062	0.0378658	0.0349742	0.0314352	0.0211128	0.0224116	0.0414457	0.0360185	0.0427366	0.0368369	0.0360399	0.0332551	0.045756	0.0284939	0.0415108	0.00476065	0.0380203	0.0299747	0.0259114	0.0569401	0.0395596	0.0313399	0.0407293	0.033295	0.0316032	0.05529	0.0382166	0.0252164	0.0223726	0.0224049	0.0288283	0.0336739
1697						337.906	1001.88	0.0377142	0.0452026	0.0963868	0.0927411	0.0706943	0.045658	0.0619327	0.0505738	0.0557402	0.097336	0.0612768	0.0412662	0.0434752	0.0320042	0.145471	0.0631924	0.0788258	0.0337637	0.0481386	0.0649546	0.0633174	0.0470227	0.0506424	0.119471	0.038376	0.0287023	0.0576395	0.040104	0.0314671	0.135728	0.0394981	0.0508214	0.0450283	0.0278484	0.0549808	0.0369952	0.0475599	0.04594	0.0464457	0.0799475	0.0389218	0.053157
230						123.902	999.364	0.197391	0.103466	0.157709	0.168126	0.0740204	0.153278	0.122998	0.233352	0.179483	0.119029	0.20837	0.118695	0.206547	0.132713	0.121052	0.293725	0.180163	0.0499422	0.231378	0.166955	0.16092	0.250507	0.172331	0.149518	0.248431	0.135689	0.167326	0.0980273	0.0346093	0.205798	0.137972	0.218293	0.141071	0.0805211	0.103146	0.250396	0.161545	0.161861	0.229158	0.154394	0.145306	0.162295
2379						420.906	996.368	0.0217339	0.0240917	0.0239636	0.0226473	0.025808	0.0204722	0.0224914	0.0303677	0.0247104	0.0240995	0.0401123	0.0155022	0.0311484	0.0249455	0.0211316	0.0231258	0.0160838	0.0226033	0.0253698	0.0247376	0.0242573	0.0245154	0.0491973	0.0305368	0.0334829	0.0235506	0.0502238	0.02314	0.0271002	0.0260015	0.0221276	0.0402317	0.0164344	0.0244814	0.0230081	0.0317094	0.0286526	0.0252525	0.0775094	0.0324919	0.027892	0.031877
593						171.957	991.762	0.0281456	0.0404181	0.0339517	0.0528214	0.0420272	0.0327968	0.0339569	0.0176432	0.040407	0.0408092	0.0561046	0.0323381	0.0291535	0.0247667	0.0438156	0.0248678	0.0430427	0.0379045	0.0384958	0.038397	0.0365932	0.0363116	0.0316443	0.0392088	0.100257	0.0252891	0.0874599	0.0286809	0.0666755	0.0370346	0.0245336	0.0499391	0.0587612	0.0382985	0.0327351	0.00898315	0.0011858	0.0385059	0.0871907	0.0101559	0.0315044	0.0417177
315						136.863	991.122	0.0117474	0.0246882	0.0229025	0.0237928	0.0252763	0.0253288	0.0331843	0.0792167	0.0272092	0.0261897	0.0273621	0.035223	0.107989	0.00993271	0.0343611	0.0247903	0.0269948	0.0225088	0.023973	0.0246318	0.0318651	0.0226468	0.0218142	0.0296552	0.0186946	0.0235127	0.0336232	0.0297644	0.0241622	0.0285318	0.0185245	0.0241004	0.0240056	0.0250816	0.0258399	0.012518	0.0257475	0.0274512	0.0267629	0.0412653	0.0253466	0.0254524
911						223.798	981.362	0.0139353	0.0118554	0.00371355	0.0267972	0.0262077	0.0232138	0.0209799	0.0274947	0.0191005	0.021397	0.0422365	0.00852606	0.0222445	0.00560218	0.0172254	0.0192642	0.0450657	0.0122392	0.0211169	0.0198484	0.0204032	0.0197019	0.0174142	0.0164877	0.0170396	0.0153572	0.0192077	0.0312356	0.0171945	0.0210549	0.0172979	0.0175593	0.0341702	0.0364159	0.0157652	0.0149479	0.0252842	0.0294345	0.0248499	0.0163203	0.0169091	0.0211824
623						175.959	975.892	0.132221	0.0768854	0.121879	0.174337	0.0689715	0.0888068	0.113907	0.0700498	0.0760384	0.0581777	0.0770542	0.0829727	0.0851785	0.0951472	0.0696053	0.0638581	0.137599	0.0678249	0.0673241	0.0964408	0.091214	0.0675287	0.0608911	0.0118138	0.0687015	0.0602372	0.0947303	0.0581102	0.026406	0.0662878	0.0624707	0.0736741	0.0742381	0.0690902	0.0713156	0.0733525	0.102599	0.0737888	0.0880509	0.0616032	0.0363505	0.065062
1399						304.914	974.505	0.0535342	0.0446347	0.0614924	0.034149	0.0616361	0.0451732	0.103497	0.0448487	0.0959891	0.0308115	0.045688	0.0441071	0.0471889	0.0463912	0.0746128	0.0403287	0.048237	0.105212	0.0408783	0.0379741	0.0553192	0.042674	0.012369	0.0391043	0.0438254	0.0409496	0.0412508	0.0396636	0.0440251	0.0445328	0.0390174	0.0419717	0.0314829	0.0435143	0.0302828	0.0390996	0.0452403	0.0447151	0.0370441	0.0406887	0.0415926	0.0391522
828			2,2-dibromoacetic acid	-11.7822		214.832	973.961	0.0206535	0.0184668	0.0126207	0.0180542	0.0308284	0.0509374	0.0210657	0.0547747	0.0381039	0.0213151	0.031574	0.0433892	0.028029	0.0208822	0.0267347	0.0251411	0.0371036	0.060267	0.029437	0.0372114	0.0313295	0.0230897	0.045301	0.0450004	0.0247225	0.024784	0.0327896	0.0178522	0.0248004	0.0415179	0.021781	0.0224508	0.0877906	0.0243504	0.0311614	0.0636926	0.0425141	0.0337613	0.035066	0.00314139	0.0276698	0.0336619
3191						514.893	971.527	0.0365835	0.0517951	0.0569939	0.024112	0.0977522	0.0524041	0.0229228	0.0287018	0.0495988	0.0259347	0.0612419	0.0428692	0.0206255	0.026338	0.0483532	0.0157187	0.0352745	0.0449399	0.01625	0.0429775	0.0400694	0.0309727	0.0205756	0.0246338	0.0237474	0.047589	0.0119279	0.0466939	0.0508136	0.0485448	0.0252658	0.0259563	0.0242713	0.0398118	0.0239052	0.0427502	0.044178	0.0382313	0.056423	0.0157293	0.0258662	0.0333944
1161						264.968	971.114	0.0244928	0.0258044	0.0284558	0.0270357	0.025402	0.0283181	0.0244941	0.0263161	0.025411	0.0264056	0.0334963	0.0267665	0.0272853	0.0281018	0.0271079	0.0264669	0.0281665	0.0252702	0.0292318	0.0236921	0.026886	0.0273177	0.0322142	0.0480206	0.0233191	0.0227314	0.0230298	0.023297	0.0284297	0.0274112	0.0305286	0.025281	0.026359	0.0197894	0.025919	0.0276734	0.0279889	0.0505478	0.0254016	0.0222837	0.00406099	0.0270802
594						171.957	970.475	0.0375692	0.0341963	0.0431383	0.03366	0.0438148	0.0450879	0.0345954	0.0367416	0.0646172	0.0403169	0.0585263	0.0347937	0.0468438	0.0749596	0.0371916	0.0280998	0.0504905	0.0541816	0.0235756	0.0414387	0.0431919	0.0368337	0.042377	0.00837191	0.041584	0.0329573	0.0370073	0.027073	0.0363422	0.0547432	0.0328258	0.00786946	0.0129672	0.0405284	0.0421904	0.0401161	0.0399734	0.0431895	0.0313841	0.0445157	0.0389657	0.0345908
312						136.863	970.451	0.0265974	0.0174036	0.0388123	0.023738	0.0249203	0.032974	0.0225234	0.00376692	0.0629563	0.0329283	0.0303623	0.0237834	0.035936	0.0244111	0.0167618	0.0252362	0.0251922	0.0171916	0.0217084	0.00467809	0.0255941	0.0245637	0.0206803	0.0220571	0.0149978	0.0229879	0.0251412	0.0204691	0.0325264	0.0308543	0.0217755	0.0237631	0.0252427	0.0281101	0.0275288	0.00592038	0.0246983	0.0340662	0.0281403	0.0293765	0.0574594	0.0260179
298						134.865	963.385	0.0167917	0.0698185	0.0531484	0.0490681	0.0537206	0.0819974	0.0608228	0.0428632	0.0740077	0.0654876	0.0678499	0.0415406	0.0610162	0.0570619	0.0856182	0.105203	0.0444532	0.0523511	0.0655112	0.0393366	0.0593834	0.0987538	0.0679019	0.0605696	0.0106638	0.0414554	0.0550101	0.00588679	0.0503427	0.0728657	0.0711902	0.0352879	0.0255096	0.0442204	0.0528562	0.0560961	0.0574724	0.0415669	0.0557729	0.0543194	0.0733699	0.0515556
1692						337.906	959.525	0.0140721	0.0563175	0.0645574	0.105386	0.09499	0.19969	0.129184	0.0847253	0.103859	0.0557979	0.134666	0.109081	0.0902701	0.0967635	0.0705507	0.0740664	0.0957935	0.072753	0.268195	0.123145	0.102193	0.092254	0.0777806	0.0643387	0.0621217	0.103917	0.102003	0.0728715	0.123343	0.0746852	0.159984	0.078949	0.0755249	0.0783294	0.0969569	0.108419	0.108159	0.0813421	0.121451	0.171843	0.0946558	0.0974465
857						216.83	956.362	0.0100884	0.00482664	0.0103581	0.0177366	0.0203202	0.0114635	0.0090405	0.0137357	0.0086381	0.00877479	0.0138541	0.00991558	0.0140742	0.0130269	0.0107479	0.0117469	0.0153442	0.00998761	0.00871602	0.0129759	0.0117686	0.0107344	0.00879193	0.0094476	0.01554	0.00906922	0.0128779	0.00987326	0.00997719	0.014101	0.00885036	0.00887162	0.0112274	0.0125615	0.00963055	0.010465	0.0102324	0.0111154	0.0176191	0.00866624	0.0108915	0.0110272
1397						304.914	956.134	0.0479682	0.0396957	0.0367172	0.0276077	0.062274	0.0349772	0.0373572	0.0402502	0.060178	0.118912	0.0820312	0.0383395	0.0423434	0.0337099	0.0405271	0.0558561	0.0390481	0.0399524	0.041478	0.0394527	0.0479338	0.0380691	0.0326552	0.0478171	0.0400235	0.0386138	0.0357575	0.0360981	0.0425135	0.0376924	0.0457329	0.0374153	0.0070223	0.0406412	0.0464112	0.0352066	0.0404555	0.0418476	0.0137411	0.0297406	0.0407396	0.0364097
618						175.959	954.78	0.0514247	0.102617	0.0708031	0.157771	0.0850578	0.0721601	0.0806072	0.132142	0.123398	0.0299072	0.189036	0.0762418	0.0900047	0.0819745	0.0931971	0.13784	0.0898443	0.0719913	0.103692	0.0627889	0.095125	0.0601663	0.0562082	0.101433	0.0960887	0.0733992	0.0154864	0.133326	0.0906757	0.119582	0.0760102	0.0832256	0.0750873	0.0782853	0.0792433	0.0741672	0.146783	0.0957008	0.162701	0.111511	0.0176024	0.087334
705						189.008	950.644	0.308543	0.229536	0.156761	0.204716	0.124144	0.115817	0.157543	0.123838	0.429021	0.0313794	0.257359	0.142207	0.347178	0.0380382	0.164562	0.219772	0.247387	0.150187	0.158808	0.193303	0.190005	0.168749	0.116216	0.12709	0.27565	0.109486	0.219966	0.126342	0.0545701	0.218851	0.318369	0.219821	0.138738	0.361253	0.281816	0.376372	0.208109	0.0966141	0.24333	0.189885	0.16589	0.200856
2377						420.906	950.639	0.0238899	0.0223324	0.0525016	0.0302135	0.0207001	0.0370906	0.0514651	0.0361469	0.0263523	0.0241359	0.0306205	0.038058	0.0366379	0.0258864	0.0353572	0.0316967	0.0431062	0.0260195	0.0124097	0.0148377	0.0309729	0.023774	0.031666	0.0161607	0.0203822	0.0179652	0.0215509	0.0373358	0.0238564	0.0237983	0.0236804	0.0201336	0.0235847	0.0245471	0.0240342	0.0263989	0.0655267	0.0247455	0.01144	0.0228174	0.0260889	0.0254743
912						223.798	946.318	0.0144219	0.00771926	0.0229804	0.0264042	0.0191583	0.0269007	0.0282372	0.0192806	0.0236513	0.0250879	0.00357326	0.0238785	0.0219643	0.0186594	0.0168033	0.0191796	0.0261743	0.0197004	0.0140936	0.0227103	0.0200289	0.0144893	0.0154786	0.0162509	0.00569098	0.00937864	0.0217015	0.0653618	0.034248	0.0187435	0.0157844	0.00252012	0.0176242	0.0147565	0.0102787	0.0186901	0.0168591	0.0191955	0.0279723	0.00486272	0.0146195	0.0182253
2578						446.906	942.581	0.034322	0.0384936	0.0249124	0.0347318	0.030699	0.0525189	0.0187951	0.0331471	0.0841007	0.0250695	0.043978	0.0402206	0.0377589	0.0290386	0.025534	0.0361835	0.0431692	0.0348819	0.0273646	0.0388064	0.0366863	0.0329569	0.0565765	0.020849	0.0335576	0.0308847	0.0403662	0.0616176	0.0248524	0.0855696	0.0248246	0.0212021	0.0334789	0.0586873	0.0555368	0.03396	0.110225	0.0902679	0.0422168	0.0112377	0.035208	0.0452038
669						182.921	936.451	0.0321328	0.0233428	0.0264666	0.00658569	0.00591278	0.0546715	0.00575085	0.0315059	0.0326166	0.0264025	0.0337153	0.0277311	0.0304829	0.0461197	0.0351204	0.0310399	0.0451452	0.0124396	0.111262	0.0234849	0.0320965	0.0276092	0.0194629	0.0263887	0.0311279	0.0393983	0.0308701	0.037043	0.0344022	0.0380586	0.0351765	0.0451607	0.0279116	0.0309273	0.0300058	0.0232035	0.0294837	0.0283656	0.0359549	0.0263356	0.0246409	0.0310764
806						212.834	931.537	0.0240439	0.0147969	0.0699193	0.0327424	0.0288069	0.0252633	0.0248767	0.051056	0.0304898	0.0671401	0.0402161	0.0263374	0.0475485	0.0355192	0.0190557	0.0299132	0.0223553	0.0334121	0.032137	0.0346218	0.0345126	0.0277534	0.0255055	0.0167288	0.041364	0.0231767	0.00679431	0.0373133	0.0245633	0.0316064	0.0211257	0.0248533	0.030555	0.036067	0.0484558	0.0256474	0.029799	0.0375393	0.0414655	0.0192896	0.0338186	0.0291711
587						171.957	930.322	0.0634345	0.0329663	0.0158852	0.0510201	0.0426936	0.0525287	0.0413749	0.00780251	0.113867	0.0612829	0.00496703	0.0649016	0.0367493	0.0360509	0.0038141	0.0521697	0.0429482	0.0416373	0.00462595	0.0395368	0.0405128	0.0437464	0.0559921	0.0227142	0.0388858	0.0829081	0.0452344	0.0130679	0.0283831	0.0367785	0.0412275	0.0196579	0.0393213	0.0665407	0.0804623	0.0382619	0.0449742	0.00823474	0.02417	0.0446661	0.0588205	0.0417024
1392						304.914	929.97	0.0375983	0.0243967	0.00536872	0.0111528	0.00453619	0.0211336	0.0296901	0.0190992	0.0440698	0.0114877	0.0404292	0.0209604	0.0210683	0.00601938	0.0367657	0.210905	0.0213799	0.177382	0.0209145	0.021502	0.039293	0.0215038	0.0878752	0.032895	0.0212817	0.0180203	0.00446155	0.0175748	0.0241349	0.021812	0.0473268	0.0205301	0.00709404	0.040935	0.0130402	0.0187701	0.0209973	0.0214057	0.0323067	0.0299163	0.0227324	0.0262307
668						182.921	922.947	0.0399915	0.0280164	0.00344332	0.033866	0.0306911	0.0277595	0.0296674	0.038744	0.0787616	0.100915	0.0612673	0.0398284	0.035299	0.0397697	0.041048	0.0804876	0.0347608	0.0454112	0.024881	0.0472406	0.0430925	0.0525248	0.0220241	0.0298679	0.0289782	0.0329919	0.04325	0.036974	0.0291129	0.0274961	0.0337723	0.0350708	0.0494356	0.0341278	0.0493969	0.00802226	0.0308671	0.0376036	0.0417045	0.0540761	0.0275547	0.0352426
2579						446.906	917.778	0.0223146	0.040583	0.0263947	0.0654568	0.0958644	0.0483698	0.0661583	0.0521757	0.0406133	0.0341648	0.0490915	0.0277351	0.0342071	0.028195	0.0622218	0.0284124	0.0432524	0.0358413	0.111463	0.0292565	0.0470886	0.16558	0.0235163	0.0206802	0.0371147	0.0766296	0.0393652	0.0677316	0.0322052	0.057639	0.0307099	0.029759	0.0324626	0.0243954	0.0489533	0.0345161	0.0361672	0.0299891	0.0424166	0.14836	0.0363831	0.0507287
258						127.026	912.728	0.00582562	0.0115079	0.0110539	0.00977291	0.0109691	0.0100277	0.0115943	0.00885614	0.0037484	0.00457094	0.0116231	0.00891556	0.0042906	0.0117998	0.0123788	0.0106841	0.00261863	0.0104238	0.0107226	0.00914911	0.00902665	0.00514183	0.0113884	0.0124428	0.00372571	0.00202362	0.0029847	0.00950599	0.00502896	0.0104704	0.00912976	0.00766611	0.00903249	0.0104703	0.00396774	0.0122328	0.00299379	0.00379456	0.0108841	0.00840627	0.00378286	0.00725365
779						205.867	903.929	0.0423865	0.0294525	0.0520323	0.0220023	0.0391773	0.0436744	0.0238947	0.0585185	0.115712	0.0560407	0.0459328	0.0110218	0.059173	0.0641006	0.0546048	0.0200948	0.0960528	0.0193725	0.0540661	0.0897175	0.0498514	0.0489091	0.0259708	0.0523742	0.0624179	0.0530147	0.0632822	0.0426331	0.0571043	0.025837	0.0445975	0.0552016	0.062661	0.0596203	0.0579397	0.077163	0.0524732	0.0840123	0.0562845	0.0463993	0.049726	0.0538811
856						216.83	903.733	0.0556446	0.0300414	0.0643444	0.0724872	0.12465	0.0720995	0.0618739	0.0789775	0.00226179	0.087801	0.086354	0.0589469	0.0761179	0.0824754	0.0607193	0.0761239	0.0802945	0.083031	0.0666141	0.0717749	0.0696317	0.0683302	0.0636967	0.0623469	0.0913315	0.0863831	0.0813625	0.0597551	0.0666694	0.0787995	0.0564299	0.056978	0.0486744	0.0163798	0.0301533	0.0631869	0.0680037	0.0217549	0.0829222	0.0614107	0.0626408	0.0613605
1097						248.973	903.187	2.41634	2.20361	5.66501	2.24702	8.02175	1.69782	2.61207	2.20199	2.11135	3.44015	2.43659	4.98362	7.97179	2.17283	1.6699	1.87887	2.24676	7.61297	2.72739	5.70509	3.60115	2.18283	1.43672	0.611823	3.34067	7.09999	1.68487	1.55865	3.24156	2.18093	2.70056	1.83581	0.388836	2.35471	1.69505	3.17937	2.78334	2.68032	8.2678	0.243683	0.252579	2.48601
1400						304.914	899.09	0.0130326	0.0272167	0.0283977	0.025613	0.0118065	0.0226513	0.0143438	0.0217286	0.0269887	0.0346042	0.0312035	0.0240981	0.0231919	0.0253063	0.0404319	0.024521	0.0227914	0.0192048	0.0214031	0.0220635	0.0240299	0.0243524	0.0107613	0.013921	0.0219937	0.0212441	0.0257903	0.0218272	0.0256042	0.0220706	0.00317852	0.0200523	0.0148782	0.0260839	0.0196305	0.0194064	0.0210196	0.0235513	0.01345	0.0217792	0.025626	0.019811
626						175.959	897.958	0.0710509	0.0778142	0.0943926	0.0867721	0.0895364	0.0570506	0.071213	0.0845611	0.123365	0.107136	0.10901	0.0518876	0.0797067	0.0974521	0.0603519	0.0924965	0.108432	0.0937244	0.0819052	0.0797952	0.0858826	0.0905052	0.0997037	0.123989	0.0931881	0.0814185	0.105948	0.0766388	0.108312	0.0617864	0.0642387	0.0837062	0.0698302	0.0939241	0.104406	0.0839803	0.0866592	0.100742	0.052001	0.0802707	0.104844	0.0883046
5848						730.828	897.277	0.00923572	0.00876876	0.00650404	0.0129937	0.0155494	0.0115381	0.0126017	0.0173136	0.0196207	0.0120765	0.00962856	0.00663637	0.0103891	0.00211149	0.0127935	0.0214353	0.0156633	0.0163776	0.0124224	0.00325121	0.0118456	0.00728612	0.0118025	0.011394	0.0145445	0.0133381	0.0138828	0.0170387	0.00852415	0.0136044	0.0135237	0.0125638	0.0112279	0.00490096	0.0126441	0.0122288	0.0029225	0.0105867	0.0112641	0.00705613	0.0105015	0.0110418
7406			PS(18:2(9Z,12Z)/22:2(13Z,16Z))	-2.20447		838.558	889.639	0.000862823	0.00927194	0.01836	0.00980359	0.00471398	0.00575015	0.0132217	0.0097359	0.0106605	0.0132048	0.0123576	0.00402162	0.00477398	0.00770805	0.00965161	0.00754727	0.00965713	0.00282541	0.00922843	0.00837299	0.00858647	0.00927203	0.00391421	0.00855005	0.0067915	0.00706422	0.00245345	0.00740808	0.00926904	0.0133713	0.0145271	0.00719296	0.00904831	0.00838949	0.0115922	0.0073465	0.0129	0.0109841	0.00655119	0.00409755	0.00291487	0.00818191
6652			PG(15:0/22:2(13Z,16Z))	-21.8227		787.532	889.113	0.00421525	0.0138475	0.00456567	0.0213748	0.00954133	0.00850781	0.0109622	0.0070133	0.0111581	0.019552	0.0166304	0.00286777	0.00520617	0.0159251	0.0131758	0.0236039	0.0058114	0.00610815	0.00910112	0.00646342	0.0107816	0.0408893	0.00562162	0.0112957	0.0106583	0.0117676	0.0113978	0.0108738	0.026937	0.00854061	0.00924559	0.0109121	0.0122514	0.00722534	0.0107871	0.0110696	0.0241051	0.0212863	0.00961625	0.00197974	0.00952288	0.0132991
7872			PS(20:0/22:2(13Z,16Z))	-3.38676		870.62	888.908	0.00013942	0.0109671	0.0114877	0.00906884	0.00236854	0.00657094	0.00762274	0.00699529	0.00741012	0.00853391	0.0193123	0.00414647	0.00320879	0.0107845	0.00975245	0.0138888	0.00306624	0.0018473	0.00661699	0.0125557	0.0078172	0.0208538	0.00247948	0.00381344	0.00555526	0.00470558	0.00396705	0.00580786	0.00468546	0.00358691	0.0155608	0.00481691	0.0036924	0.0172433	0.00356275	0.00233435	0.0196422	0.0136752	0.00503824	0.0013723	0.00162048	0.00720069
7500			PG(19:0/22:1(11Z))	-21.8579		845.609	888.891	0.00309211	0.01628	0.0044699	0.0204907	0.0131258	0.0267926	0.0234498	0.022456	0.0226155	0.0186958	0.0280647	0.0103633	0.00567737	0.0249922	0.0219183	0.0157651	0.0182078	0.0112344	0.0126891	0.0265278	0.0173454	0.0390553	0.011913	0.0139602	0.0118218	0.011954	0.00569823	0.0202756	0.0170724	0.0215347	0.0268831	0.0150609	0.0106538	0.0319069	0.0105324	0.0121037	0.0391328	0.0198132	0.0143792	0.00413371	0.00789875	0.0172892
457						158.036	888.713	0.010731	0.0110267	0.00846557	0.0100593	0.0165756	0.00552709	0.0153236	0.0153871	0.0193113	0.015643	0.0156377	0.00892398	0.00195834	0.0140651	0.00888686	0.0163629	0.0144973	0.0104509	0.014769	0.0141192	0.0123861	0.00373863	0.0163809	0.00733686	0.0141248	0.00997934	0.00725781	0.013717	0.0182631	0.0156828	0.0113527	0.0139221	0.0166177	0.0161624	0.00987968	0.0134962	0.0139034	0.0138571	0.00816832	0.00953028	0.017837	0.0125604
8259			PS(22:1(11Z)/22:2(13Z,16Z))	-3.65523		896.635	888.553	3.21361e-05	0.0134906	0.00584408	0.0133057	0.00281321	0.00351392	0.0138198	0.00324509	0.00864607	0.0115157	0.0126049	0.00147244	0.00427134	0.01386	0.00742367	0.00929837	0.0046949	0.00453743	0.00129458	0.00381571	0.00697498	0.0291945	0.00277288	0.00461718	0.00696675	0.00497992	0.00964202	0.0149103	0.00983915	0.00278557	0.0115536	0.00733513	0.00619517	0.0125696	0.0187428	0.00987632	0.0337316	0.0262556	0.0146801	0.00211031	0.00493166	0.0116845
7815			PS(20:0/22:4(7Z,10Z,13Z,16Z))	-2.76049		866.589	888.435	0.0006668	0.00712204	0.00665859	0.0026894	0.00289852	0.0063344	0.00881538	0.00367081	0.00456492	0.01498	0.00646174	0.00150636	0.00269843	0.00759582	0.00268226	0.00499524	0.00567929	0.00278078	0.00658954	0.00445853	0.00519244	0.0129043	0.00236154	0.00479967	0.0082205	0.00205746	0.00278571	0.00891365	0.00804461	0.00504498	0.00879065	0.00653004	0.00449217	0.00780263	0.00194138	0.00529716	0.00928535	0.0114397	0.00455117	0.00160843	0.00321487	0.0060043
7018			PG(17:1(9Z)/22:2(13Z,16Z))	-22.2185		813.547	888.427	0.00260744	0.0315594	0.0126908	0.0204824	0.0245566	0.0100508	0.0239071	0.0125653	0.0241914	0.0215048	0.0223899	0.0104573	0.0198332	0.0322121	0.0186544	0.0180702	0.0197	0.0237352	0.0138335	0.0326952	0.0197849	0.0311444	0.0139822	0.0261229	0.0389979	0.0185889	0.0152794	0.0262482	0.025659	0.0183007	0.0119951	0.0250818	0.0228746	0.027922	0.0307732	0.0265099	0.0285554	0.0238758	0.0331169	0.00979822	0.0137162	0.0234271
7379			PS(18:1(9Z)/22:4(7Z,10Z,13Z,16Z))	-4.72902		836.541	888.352	3.21361e-05	0.00368778	0.00303493	0.00233094	0.00171164	0.00162005	0.00348467	0.00461661	0.00470836	0.0020484	0.00375256	0.00108847	0.00228724	0.00376845	0.00102169	0.00242985	0.00168224	0.00120642	0.0011733	0.00262264	0.00241542	0.00376432	0.000310377	0.00188229	0.00270501	0.00195564	3.61735e-05	0.00171748	0.00208614	0.00153627	0.00288139	0.000970489	0.0014314	0.00293541	0.0037633	0.00179326	0.00368686	0.00323667	0.00146177	0.000905128	0.000373922	0.00197166
6637			PS(18:1(9Z)/18:1(9Z))	-1.29556		786.528	888.243	0.0198052	0.0552955	0.0374714	0.0569218	0.0465919	0.0586383	0.0129326	0.0399428	0.0632131	0.0484498	0.0646946	0.0131732	0.0409657	0.0587808	0.0410645	0.0599355	0.0309081	0.019223	0.0406257	0.0416372	0.0425135	0.0868788	0.0372112	0.0557938	0.0367364	0.03948	0.0241745	0.0450565	0.0738268	0.0257568	0.0470058	0.047925	0.028928	0.0471602	0.0384517	0.038086	0.0397802	0.0878263	0.0569513	0.03011	0.0414148	0.0464277
6990			PG(17:0/22:4(7Z,10Z,13Z,16Z))	-21.8859		811.532	887.874	0.00509894	0.0290253	0.0149686	0.0297931	0.0138518	0.0258329	0.0276998	0.015192	0.0327382	0.0119738	0.0185188	0.0139612	0.0180381	0.0595574	0.0224144	0.0306965	0.0179941	0.0190822	0.0209623	0.0242827	0.0225841	0.0315132	0.0209453	0.0170558	0.0254061	0.0359464	0.0102651	0.026799	0.0317732	0.0184623	0.0282287	0.0182166	0.0108163	0.0335061	0.0311829	0.026811	0.0486626	0.0348301	0.0228606	0.0135441	0.016471	0.0251648
7485			PS(18:0/22:1(11Z))	-0.128664		844.607	887.117	0.0155342	0.0240904	0.0442347	0.0409782	0.0548324	0.0791085	0.0456258	0.0614842	0.0666928	0.0689369	0.0726846	0.0406661	0.0369076	0.0637514	0.0596748	0.0532318	0.0568256	0.0478297	0.0253938	0.0479446	0.0503214	0.0503006	0.0493927	0.0447799	0.0390837	0.0595174	0.0363534	0.0691976	0.071993	0.0392796	0.0533206	0.0523418	0.0534901	0.0811151	0.0518479	0.0393932	0.0897877	0.0882044	0.0409367	0.0191952	0.0450969	0.0537314
101						107.025	885.646	0.0159652	0.0124646	0.0220365	0.021781	0.0318075	0.024	0.0208587	0.0236499	0.0216524	0.0258053	0.0315072	0.0229709	0.0246667	0.0202525	0.0227114	0.0347828	0.0302306	0.0170867	0.020515	0.0172892	0.0231017	0.0214437	0.00775006	0.0240736	0.0204824	0.00680423	0.0187072	0.0450443	0.0300451	0.0361164	0.0252973	0.0267835	0.0240952	0.0239891	0.023061	0.0224203	0.0223144	0.023131	0.032369	0.016541	0.0272192	0.0238844
1587						322.904	884.266	0.0130673	0.00541256	0.00563251	0.00797939	0.00958269	0.00193872	0.0117009	0.00526816	0.0132116	0.00837305	0.00804713	0.00616118	0.0126335	0.00782485	0.00565489	0.008066	0.00742245	0.00598429	0.00365167	0.0082474	0.00779301	0.00530402	0.00754169	0.00282368	0.00760612	0.020187	0.00733425	0.00303005	0.0104188	0.00543737	0.0069883	0.00469203	0.0084558	0.00362999	0.00936395	0.00846688	0.00809015	0.00446011	0.00755744	0.00714025	0.00745287	0.00729904
363						146.961	883.375	0.141974	0.168535	0.157833	0.122371	0.174004	0.121818	0.120029	0.145614	0.137073	0.152749	0.123547	0.134778	0.145637	0.152266	0.111818	0.125143	0.1392	0.14835	0.137754	0.133483	0.139699	0.135553	0.142972	0.125801	0.0876709	0.164169	0.173478	0.120784	0.0998007	0.149982	0.145255	0.136953	0.127071	0.119208	0.127746	0.117318	0.139087	0.150134	0.159793	0.121304	0.130352	0.133722
7909			PS(20:0/22:1(11Z))	-0.177303		872.638	883.335	0.0150754	0.10652	0.0728606	0.119486	0.0852421	0.102332	0.105324	0.0934945	0.107227	0.100788	0.188756	0.0543582	0.0791893	0.162724	0.118162	0.0647335	0.131518	0.0800532	0.0906307	0.161349	0.101991	0.183829	0.0381557	0.0882707	0.0616955	0.0787057	0.0925534	0.109372	0.133997	0.0847649	0.154731	0.0817428	0.081732	0.119286	0.064186	0.0729055	0.150165	0.117965	0.104781	0.0184735	0.0762071	0.095676
4511						626.874	882.859	0.0506654	0.0607399	0.052769	0.0717286	0.0716661	0.0663276	0.0759887	0.0740991	0.0805446	0.073248	0.0766932	0.0849968	0.0629868	0.0819551	0.077002	0.0686099	0.0650024	0.0895974	0.0682105	0.0752731	0.0714052	0.0653631	0.0824363	0.0618597	0.0818118	0.0473168	0.0406329	0.0576814	0.0806298	0.080936	0.0682724	0.0597727	0.0626706	0.0644335	0.0923813	0.0769686	0.0515458	0.0896396	0.0764309	0.0548052	0.0616891	0.0678639
5301						694.861	882.842	0.0600942	0.0325428	0.0612596	0.0471804	0.0396488	0.0492294	0.0566728	0.0393532	0.0612943	0.0393901	0.0562059	0.0576761	0.0367611	0.0463389	0.0424048	0.0430906	0.0466288	0.0541023	0.0448937	0.0399934	0.0477381	0.0517773	0.0546678	0.0554844	0.0465027	0.0450977	0.0350061	0.0579164	0.0518634	0.0571141	0.057861	0.0497931	0.0585236	0.0398662	0.0347314	0.048422	0.0417794	0.0701041	0.0423465	0.0502812	0.0519185	0.0500528
3746						558.886	882.828	0.0543919	0.0765109	0.0806281	0.0625294	0.068481	0.0719811	0.0763106	0.0968305	0.104812	0.0762281	0.0727386	0.0960377	0.0961474	0.0754369	0.0912185	0.0674512	0.0619136	0.0946512	0.081784	0.0444252	0.0775254	0.0896793	0.0690731	0.0599242	0.0656164	0.0597664	0.0649064	0.0590172	0.0523016	0.0630884	0.0799022	0.0678835	0.0775481	0.0877287	0.0906758	0.088707	0.0743964	0.0874636	0.0941983	0.0697004	0.0761367	0.0738857
3781						563.916	882.825	0.00827829	0.0177622	0.0153943	0.00753597	0.0119516	0.00282328	0.00791008	0.0150703	0.00179531	0.0200964	0.0118871	0.00261332	0.0142892	0.0160097	0.00815694	0.0141646	0.0132434	0.0144157	0.00840502	0.0104969	0.011115	0.0115231	0.0118885	0.0121152	0.00687596	0.0120155	0.00721255	0.0125139	0.00190386	0.0119594	0.0116414	0.00138503	0.0160991	0.00878449	0.0114691	0.010576	0.0171688	0.00163525	0.0141022	0.0110807	0.00568002	0.0098815
6284						760.843	882.821	0.0400665	0.0425941	0.0384579	0.0380237	0.044594	0.0522717	0.0410385	0.0400815	0.0332911	0.0328219	0.0373193	0.0358151	0.0404224	0.019571	0.0424892	0.0336083	0.0372652	0.0370106	0.0492065	0.0329237	0.0384436	0.0342737	0.0143852	0.0192058	0.0437629	0.0391752	0.0364784	0.0422386	0.0333291	0.0315952	0.0421561	0.0409503	0.0409632	0.0245109	0.0320664	0.0368355	0.0417969	0.0311076	0.0335456	0.040022	0.0318595	0.0345129
6979			PS(18:0/20:4(5Z,8Z,11Z,14Z))	-3.66318		810.526	882.765	0.0147233	0.037925	0.0481474	0.0623943	0.0452448	0.0586384	0.0697434	0.0536464	0.108992	0.0646568	0.114893	0.0283199	0.030989	0.0660818	0.0573567	0.0447963	0.0308276	0.0316494	0.0948999	0.0518672	0.0557896	0.0782419	0.046109	0.0690201	0.0215955	0.0545092	0.0355716	0.0432721	0.0775971	0.0643671	0.105471	0.0610384	0.033895	0.0759195	0.0803224	0.0501771	0.0694088	0.106873	0.0542894	0.0230341	0.0405359	0.0595624
2256						404.929	882.58	0.0148402	0.00966511	0.02146	0.0092181	0.0206078	0.0176921	0.0175373	0.0159523	0.0223978	0.0153079	0.0077464	0.0177114	0.0139046	0.011715	0.0199272	0.0202574	0.0212373	0.0131943	0.0124033	0.0109356	0.0156856	0.0193068	0.0138995	0.00855399	0.0187967	0.0173412	0.0127509	0.0133394	0.0111821	0.0209345	0.0146753	0.0097514	0.0156513	0.00666935	0.0229082	0.0127756	0.0117052	0.0184386	0.00976078	0.0199703	0.013737	0.0146074
7346						834.846	882.299	0.0497579	0.0824426	0.0679749	0.0530772	0.080064	0.0691518	0.0618476	0.0730916	0.074144	0.0689141	0.0679182	0.074463	0.069575	0.0801413	0.0620047	0.0759494	0.0779356	0.0707004	0.0659146	0.0625088	0.0693788	0.0703922	0.0674538	0.056527	0.0677845	0.0622453	0.0776165	0.064228	0.0700688	0.05562	0.0628326	0.0626499	0.0717696	0.0563404	0.0659633	0.0638583	0.0573508	0.0819242	0.050668	0.068623	0.0741329	0.0654025
9387						996.821	882.299	0.0408459	0.0532272	0.0483393	0.0352939	0.056924	0.0370139	0.0539771	0.0540405	0.0616262	0.0509905	0.0529559	0.0526053	0.0451167	0.0518292	0.0394946	0.0477647	0.0426567	0.0470458	0.0309804	0.0447933	0.0473761	0.0477005	0.0552055	0.0461793	0.0598115	0.0486357	0.0484729	0.0352704	0.0516626	0.0401084	0.043387	0.0394968	0.0412778	0.0297845	0.0518284	0.0467698	0.0518801	0.0578427	0.0580227	0.0362815	0.0406214	0.046512
1886						363.942	882.293	0.0113965	0.0260316	0.0241534	0.0275345	0.0239542	0.0159177	0.0210183	0.0206179	0.0269859	0.0300383	0.0161163	0.0121543	0.0189006	0.028327	0.0207097	0.020049	0.00818998	0.0160236	0.0136323	0.0212499	0.02015	0.022478	0.0124743	0.0183908	0.0275772	0.0208463	0.019194	0.0162579	0.0188592	0.0207929	0.0135203	0.00841335	0.00988019	0.0141444	0.0159229	0.0113679	0.0180245	0.0138504	0.0339596	0.012114	0.0159551	0.0172012
6366						766.859	882.292	0.11726	0.146656	0.125973	0.120743	0.116134	0.132259	0.127786	0.123327	0.148091	0.127005	0.135803	0.121223	0.119015	0.132932	0.126675	0.119204	0.147521	0.125318	0.128201	0.134752	0.128794	0.129128	0.125354	0.116767	0.126344	0.108408	0.126435	0.100108	0.134068	0.128429	0.113136	0.120308	0.126083	0.117499	0.13232	0.119151	0.114735	0.150352	0.136326	0.118777	0.120388	0.123206
5274						692.856	882.29	0.0742905	0.0860174	0.0792828	0.0696021	0.0766849	0.08168	0.0696662	0.0760078	0.0927303	0.0813285	0.0823709	0.0632872	0.0797099	0.0734765	0.072413	0.0760236	0.083209	0.0802134	0.07878	0.0443823	0.0760578	0.0693661	0.069824	0.0704897	0.0806427	0.071011	0.0718738	0.0799159	0.076164	0.0743188	0.0655283	0.0594071	0.0745438	0.0656871	0.0791851	0.0754858	0.0658663	0.0748992	0.0803612	0.0760221	0.0872853	0.0733939
5362						698.871	882.29	0.186757	0.251817	0.220762	0.198484	0.201612	0.235014	0.205597	0.226671	0.245084	0.216228	0.236392	0.224311	0.193462	0.213788	0.202716	0.213164	0.221256	0.216853	0.23242	0.203577	0.217298	0.200955	0.204947	0.21381	0.217746	0.18022	0.203889	0.176504	0.241356	0.227004	0.209442	0.212767	0.202542	0.211502	0.200346	0.204797	0.225107	0.226355	0.219838	0.203585	0.238587	0.211065
1087						243.947	882.289	0.0266607	0.021858	0.0451821	0.0329923	0.0464664	0.0280587	0.0321981	0.0398521	0.0397031	0.0194567	0.0439486	0.0279306	0.0455079	0.0349389	0.0353048	0.0480205	0.0211301	0.0405997	0.0502934	0.0272399	0.0353671	0.0383952	0.0463004	0.038058	0.0557751	0.054251	0.040969	0.0367753	0.0380053	0.0230648	0.0111673	0.0370484	0.0509526	0.0360454	0.0403967	0.0384178	0.0409814	0.0231103	0.0574698	0.0393086	0.0537914	0.0400142
4497						624.868	882.281	0.0859584	0.122428	0.104732	0.0906669	0.0980886	0.0996785	0.0954154	0.0996335	0.0998497	0.0977531	0.104774	0.0859402	0.10725	0.100934	0.0922673	0.0894037	0.113871	0.102396	0.103193	0.100279	0.0997256	0.096149	0.0892915	0.0949275	0.108662	0.0873906	0.105116	0.0850887	0.107622	0.101939	0.0948259	0.102716	0.10611	0.0929441	0.116443	0.0983753	0.0934093	0.113178	0.105046	0.0949917	0.0943568	0.0994292
5986						740.845	882.261	0.0561562	0.0802858	0.0609027	0.0471638	0.0635356	0.0658397	0.0606334	0.0555481	0.0626421	0.0520435	0.0576819	0.0561634	0.0423131	0.0531639	0.0521653	0.0543929	0.0499964	0.0595778	0.05122	0.0564271	0.0568926	0.0562029	0.0538308	0.0510956	0.058912	0.0571924	0.0507471	0.0549775	0.0648165	0.0505154	0.0595508	0.0575398	0.0504488	0.0516712	0.0674045	0.0577159	0.0514346	0.0587026	0.0667207	0.057472	0.0357246	0.0556338
3887						576.863	882.24	0.0276078	0.0521067	0.0363278	0.0295611	0.0334145	0.0392065	0.0359209	0.0366854	0.041219	0.0475124	0.0467136	0.0250982	0.038058	0.0310057	0.0361012	0.0431706	0.0203781	0.0366728	0.0365489	0.035431	0.036437	0.0290468	0.0426244	0.0312248	0.0379716	0.0308478	0.0214275	0.0317076	0.0493117	0.0296962	0.0354015	0.027227	0.0408621	0.0368538	0.0369526	0.0357554	0.0295416	0.0330334	0.0426376	0.0266818	0.0490731	0.0348939
3449						530.866	882.231	0.0253102	0.0134052	0.0240066	0.0111404	0.0217902	0.0184236	0.0199264	0.0163033	0.0185944	0.0209055	0.0104085	0.0136578	0.015108	0.0204802	0.0153112	0.0223521	0.0161871	0.0087383	0.0215535	0.0125233	0.0173063	0.0279958	0.0168379	0.00913608	0.0123331	0.0257385	0.0129634	0.00730303	0.0292048	0.0273727	0.0270635	0.0163383	0.0187046	0.0165362	0.0235	0.0118022	0.0252063	0.0150892	0.0138972	0.0171579	0.0193843	0.0186783
3726						556.88	881.825	0.114857	0.12933	0.117265	0.116722	0.123868	0.110536	0.128232	0.136865	0.1466	0.118961	0.13995	0.121062	0.128866	0.12717	0.127832	0.119433	0.128377	0.129698	0.13026	0.102755	0.124932	0.105046	0.118353	0.122856	0.129174	0.109698	0.122932	0.105528	0.142858	0.140244	0.109286	0.11825	0.113688	0.115659	0.113892	0.120646	0.132882	0.119884	0.129154	0.121011	0.136006	0.121352
8231			PS(22:0/22:4(7Z,10Z,13Z,16Z))	-3.51228		894.62	881.825	3.21361e-05	0.011472	0.000781617	0.0218458	0.00546579	0.0213443	0.00389346	0.0131024	0.00114815	0.0187372	0.0279562	0.00657346	0.00409076	0.0234409	0.0163707	0.0141577	0.0128817	0.00902228	0.00983349	0.0177624	0.0119956	0.037183	0.00407538	0.0045021	0.00910112	0.0104103	0.0144068	0.0186617	0.0203259	0.0150647	0.00260101	0.00798044	0.00942643	0.00673202	0.0145425	0.00795546	0.0418159	0.030271	0.0162881	0.000323778	0.00640561	0.0139037
4252						604.871	881.802	0.144011	0.179415	0.153803	0.141492	0.151781	0.158142	0.156312	0.170066	0.175448	0.159796	0.176562	0.167201	0.156945	0.162484	0.156139	0.142715	0.158874	0.150733	0.152444	0.157062	0.158571	0.145486	0.158943	0.152876	0.158294	0.141515	0.149575	0.141951	0.180545	0.155225	0.15405	0.150673	0.141783	0.156924	0.167045	0.164244	0.157495	0.167729	0.165497	0.164433	0.153636	0.156396
8677						928.835	881.801	0.0980666	0.143953	0.112079	0.124368	0.116535	0.130171	0.125586	0.119864	0.136073	0.118239	0.126351	0.132473	0.11215	0.109452	0.127328	0.127749	0.111921	0.130852	0.122501	0.116709	0.122121	0.116382	0.106185	0.107929	0.124919	0.0973196	0.117035	0.100388	0.124903	0.123988	0.118538	0.120076	0.113186	0.112583	0.125503	0.106361	0.109459	0.130049	0.125862	0.110044	0.117762	0.115423
633						178.949	881.794	0.0790879	0.0682959	0.0949701	0.0836672	0.0761285	0.100132	0.0977576	0.100893	0.105805	0.0852854	0.0941749	0.0926991	0.0902725	0.0752376	0.106742	0.0866618	0.102539	0.10312	0.0858409	0.0855534	0.0907432	0.0822429	0.0999909	0.0890699	0.0961519	0.0925487	0.0947452	0.0584855	0.112	0.131771	0.103748	0.0872877	0.0928611	0.0894585	0.0901527	0.0885148	0.0477652	0.119249	0.105298	0.0917871	0.0930834	0.0933106
7640						854.83	881.794	0.0570219	0.0782821	0.0784629	0.0624722	0.0786539	0.0685585	0.0692412	0.0742308	0.0754729	0.0726	0.0756419	0.0817657	0.0667593	0.0748193	0.0655897	0.0777425	0.0776266	0.0654417	0.0769829	0.0670033	0.0722185	0.081253	0.0761546	0.0598526	0.0750042	0.0641388	0.0770865	0.0630196	0.0793029	0.0773079	0.069944	0.0679376	0.0633393	0.073647	0.0793595	0.0744037	0.0679228	0.0761233	0.0796356	0.0652126	0.0748185	0.0722732
3532						536.884	881.788	0.164351	0.21378	0.195923	0.183587	0.198933	0.192017	0.196312	0.213468	0.232999	0.18869	0.211143	0.199211	0.188647	0.189794	0.190973	0.200294	0.206919	0.196326	0.209819	0.178103	0.197564	0.188258	0.204592	0.18868	0.209191	0.187093	0.192527	0.177202	0.208585	0.198335	0.194021	0.187621	0.201935	0.184016	0.203493	0.179014	0.175021	0.215136	0.198335	0.172187	0.20614	0.193569
4576						634.889	881.788	0.0376147	0.129976	0.0463963	0.0389315	0.0570625	0.0512525	0.0527878	0.0565441	0.0342662	0.0438409	0.0496726	0.0501512	0.0496687	0.0484624	0.0422121	0.0526035	0.0480671	0.0472722	0.0444647	0.0424319	0.051184	0.0468642	0.0440496	0.0373937	0.0590255	0.037283	0.0444724	0.031335	0.052678	0.0462369	0.0459543	0.0382547	0.0458287	0.036583	0.040991	0.0404963	0.0487605	0.0488676	0.0419688	0.0308021	0.0508854	0.0434365
4667						644.85	881.786	0.020264	0.0383994	0.0312518	0.0228675	0.0309475	0.0419787	0.0214469	0.0229468	0.0336521	0.0334572	0.035061	0.0147864	0.0248673	0.0246478	0.0183294	0.038572	0.0355203	0.0232324	0.0205757	0.0238661	0.0278335	0.0268421	0.0242134	0.0213648	0.0203856	0.0241103	0.0273226	0.0233901	0.0326965	0.0256906	0.0129294	0.0270928	0.0255528	0.0164504	0.0207306	0.021003	0.029559	0.0311701	0.0217207	0.0289572	0.0223916	0.0241787
2954						488.894	881.785	0.121947	0.122528	0.115743	0.120015	0.121408	0.121627	0.126678	0.120882	0.138228	0.110115	0.120893	0.140738	0.125289	0.11894	0.11756	0.118718	0.122888	0.131389	0.111633	0.126206	0.122671	0.115695	0.131943	0.111336	0.128481	0.108464	0.143066	0.103779	0.123682	0.127162	0.123692	0.119242	0.124612	0.124248	0.115776	0.104892	0.118537	0.137347	0.119751	0.115653	0.13609	0.121672
5011						672.857	881.785	0.0676588	0.105335	0.0925666	0.088862	0.092141	0.0985996	0.0922151	0.0942706	0.105354	0.0928827	0.105912	0.0967611	0.0974855	0.096339	0.0911773	0.091014	0.100662	0.0773568	0.0894985	0.083747	0.0929919	0.0792796	0.104337	0.0945217	0.0999885	0.0865946	0.093926	0.0814388	0.0899792	0.0898109	0.0875168	0.0885208	0.087854	0.0876269	0.101137	0.0917606	0.0861024	0.107191	0.102863	0.0837899	0.0981237	0.0921181
6732						793.863	881.785	0.0459642	0.0674791	0.0660858	0.0507272	0.0618936	0.050911	0.0497245	0.0593869	0.0572502	0.0593194	0.0589416	0.063711	0.0576385	0.0537132	0.0568269	0.0490555	0.0480203	0.0464026	0.0515281	0.0487448	0.0551662	0.0575524	0.0516006	0.0479164	0.0574053	0.052415	0.0518975	0.0541083	0.0636512	0.0553182	0.0510046	0.0525432	0.0442975	0.0522737	0.0633873	0.0514526	0.0562414	0.0443793	0.0635724	0.0579352	0.0500624	0.0539507
1298						294.953	881.784	0.160139	0.300911	0.181342	0.165866	0.171763	0.162624	0.188881	0.188419	0.227147	0.172929	0.178116	0.210255	0.177613	0.187154	0.18528	0.183213	0.18147	0.175359	0.191066	0.173985	0.188177	0.164697	0.162836	0.178675	0.191408	0.149009	0.186263	0.152899	0.197814	0.190026	0.189386	0.166108	0.173598	0.172816	0.185903	0.173643	0.183762	0.193482	0.172944	0.170654	0.213255	0.178459
2516						440.888	881.784	0.0423474	0.0543317	0.0551873	0.0501428	0.042486	0.0473198	0.0362366	0.047492	0.0590716	0.059006	0.0417842	0.0446856	0.0587676	0.0546317	0.0461978	0.0521832	0.0568653	0.0580988	0.0411692	0.0513836	0.0499694	0.0509123	0.0449816	0.0550081	0.051504	0.0453198	0.0401293	0.0413324	0.0572408	0.0437878	0.0449164	0.0431494	0.0542638	0.0313774	0.0536444	0.0405323	0.0440918	0.0425158	0.0425315	0.0472691	0.039047	0.0456778
2594						447.909	881.784	0.0514092	0.104356	0.0744733	0.0492564	0.0678482	0.0603722	0.0748155	0.0741107	0.0659524	0.066091	0.0699558	0.0588606	0.06835	0.0506401	0.05407	0.0603771	0.0707306	0.0693112	0.0785778	0.0615254	0.0665542	0.0550651	0.0700008	0.0648572	0.0499826	0.061982	0.0548379	0.060056	0.0579703	0.0600958	0.0654099	0.0593508	0.0725964	0.0651271	0.056078	0.052959	0.0644241	0.067834	0.0673182	0.0658402	0.0569544	0.061437
3106						508.875	881.784	0.0443214	0.0470966	0.0481399	0.0446039	0.0548408	0.0550895	0.043903	0.0464625	0.0578192	0.0427362	0.0499394	0.0399203	0.0342391	0.0533758	0.0408561	0.0486218	0.0407812	0.0501412	0.0435899	0.0327592	0.0459619	0.0390767	0.0338493	0.0321425	0.0436445	0.0474075	0.0425958	0.0300999	0.0578323	0.0461592	0.0534457	0.044133	0.050572	0.0393587	0.048973	0.0414316	0.0339735	0.050572	0.0470574	0.0463931	0.0587686	0.0443743
4545						630.886	881.784	0.272392	0.324617	0.319039	0.315127	0.329985	0.326589	0.327869	0.313421	0.339228	0.312489	0.346835	0.304219	0.319102	0.315641	0.327296	0.309288	0.325656	0.321668	0.29833	0.321816	0.31853	0.320645	0.300545	0.309727	0.31047	0.312385	0.302954	0.29665	0.344371	0.318166	0.284941	0.293049	0.299034	0.269071	0.310279	0.303157	0.285819	0.357646	0.342713	0.290117	0.29552	0.307363
7753						861.849	881.784	0.0215013	0.0171152	0.014451	0.00350359	0.0237899	0.00848835	0.0102696	0.00960201	0.0257395	0.0135681	0.0211839	0.0216463	0.00846973	0.0212215	0.0162114	0.0182379	0.0253067	0.0162541	0.0176868	0.0156142	0.0164931	0.0144064	0.0244774	0.0126311	0.0237509	0.0299409	0.0110085	0.0127215	0.0126868	0.0133509	0.0216957	0.0092839	0.0164794	0.0173387	0.0113869	0.0130956	0.0188989	0.0288871	0.0226234	0.0152534	0.0133191	0.0171618
3205						515.895	881.782	0.0642052	0.0946325	0.0684218	0.0574738	0.0714014	0.0709424	0.0618363	0.0624739	0.086781	0.0725909	0.0592875	0.058795	0.0660579	0.0703065	0.0780879	0.0726743	0.070084	0.0716931	0.0663633	0.0574967	0.0690803	0.0638728	0.0608044	0.0600095	0.0620941	0.0635326	0.0642948	0.0619192	0.0767501	0.0536577	0.0743507	0.0617903	0.0599665	0.0717048	0.0689698	0.0562029	0.0569966	0.0620332	0.0717176	0.0633419	0.0750654	0.0644537
5655						719.859	881.778	0.0141778	0.0252287	0.0189587	0.0183859	0.0208958	0.0077159	0.0142889	0.0213853	0.0218522	0.024	0.0238561	0.0278929	0.0254727	0.0156864	0.00900161	0.0130869	0.0285443	0.0153948	0.0168435	0.0165096	0.0189589	0.0184532	0.0232646	0.0136552	0.0209735	0.0178032	0.0207554	0.0151909	0.0173316	0.0163652	0.0153351	0.0275218	0.0200598	0.022245	0.0196071	0.0120285	0.0287407	0.02312	0.0066294	0.0203194	0.00787187	0.0183636
620						175.959	881.777	0.149	0.201285	0.18368	0.215599	0.210799	0.21005	0.215294	0.219731	0.250626	0.179536	0.227568	0.169618	0.190768	0.194801	0.176647	0.237062	0.231805	0.193353	0.186789	0.207967	0.202599	0.179626	0.212981	0.181603	0.192213	0.189084	0.223626	0.171512	0.227355	0.235587	0.174763	0.166404	0.18495	0.202545	0.199546	0.223652	0.212935	0.214449	0.237735	0.158673	0.18612	0.198768
1874						362.941	881.777	0.2102	0.407366	0.240173	0.229507	0.245341	0.235929	0.248418	0.259731	0.282476	0.245087	0.242517	0.245314	0.243145	0.226697	0.244276	0.250655	0.268662	0.250464	0.268001	0.232868	0.253841	0.243335	0.238111	0.233052	0.252749	0.219582	0.232329	0.22208	0.2614	0.286985	0.235713	0.214876	0.244785	0.240637	0.228702	0.230809	0.247401	0.248673	0.26374	0.203975	0.257971	0.240345
5636						718.854	881.776	0.227514	0.27918	0.272252	0.239048	0.227059	0.262715	0.231448	0.250806	0.286116	0.245662	0.26791	0.281059	0.256188	0.232685	0.249119	0.253176	0.261688	0.246633	0.264033	0.229154	0.253172	0.245495	0.214817	0.242708	0.269338	0.210383	0.241191	0.21288	0.265224	0.258312	0.257894	0.2451	0.239762	0.246863	0.251547	0.256579	0.243797	0.283403	0.265794	0.230774	0.271132	0.24765
4003						583.884	881.775	0.0544066	0.0802448	0.0621791	0.0549935	0.0359852	0.0339608	0.0520215	0.0542958	0.0606303	0.0458665	0.0503127	0.0530994	0.0475119	0.0654817	0.0482773	0.0562165	0.0543608	0.0567469	0.0535126	0.0404269	0.0530265	0.0523002	0.0540102	0.0367913	0.0605048	0.0456399	0.0620091	0.0443794	0.0594166	0.0541713	0.0592283	0.0601484	0.0553083	0.0338808	0.0511201	0.0380688	0.0501669	0.0396664	0.0517479	0.0436763	0.0625923	0.0507414
1522						314.932	881.774	0.00551136	0.0163264	0.0144585	0.0122756	0.0237578	0.0246571	0.0253663	0.0199511	0.0284539	0.0162798	0.0233295	0.0257184	0.0187125	0.0179167	0.0212365	0.0103992	0.0233592	0.016257	0.00190904	0.0234688	0.0184672	0.0149454	0.019911	0.00765553	0.0252918	0.0117184	0.0210876	0.0180137	0.0147856	0.0166908	0.0172258	0.0280295	0.0223882	0.0192356	0.0126121	0.0216431	0.0233093	0.0239123	0.0162652	0.0200054	0.0189629	0.0186845
3770						562.898	881.774	0.381063	0.458416	0.416327	0.373585	0.424775	0.449233	0.406076	0.446306	0.42757	0.408737	0.474476	0.414557	0.428419	0.370911	0.412488	0.398827	0.482045	0.414022	0.416057	0.403113	0.42035	0.381964	0.402482	0.40151	0.424968	0.395056	0.438103	0.356527	0.435927	0.434616	0.414188	0.379414	0.384978	0.439314	0.397727	0.413329	0.398831	0.434195	0.431405	0.386417	0.43212	0.409154
958						226.966	881.773	0.208958	0.655664	0.277337	0.203729	0.216179	0.23403	0.212554	0.292984	0.32835	0.278781	0.218757	0.246107	0.285906	0.222073	0.308145	0.208391	0.246367	0.266175	0.238302	0.195429	0.267211	0.297388	0.21128	0.201431	0.247844	0.212267	0.203891	0.234585	0.231606	0.231938	0.220325	0.25915	0.216168	0.19799	0.208041	0.241706	0.234514	0.238396	0.24625	0.189233	0.256677	0.229034
6641						786.842	881.773	0.132168	0.198056	0.156819	0.139269	0.154411	0.144928	0.153373	0.153169	0.171281	0.15325	0.160085	0.148886	0.14836	0.146019	0.15733	0.145971	0.161366	0.147985	0.162305	0.133901	0.153447	0.141101	0.152805	0.141952	0.165461	0.142581	0.144754	0.125243	0.157453	0.167236	0.160473	0.147204	0.150348	0.135087	0.14831	0.137433	0.138843	0.170247	0.149515	0.1478	0.175421	0.149963
5417						702.877	881.771	0.00906854	0.048193	0.0157648	0.0138456	0.0197509	0.0112549	0.011764	0.0173297	0.0170883	0.0130829	0.0086318	0.0119119	0.0155038	0.0107293	0.0173912	0.0103779	0.0177649	0.00807167	0.0110267	0.00841179	0.0148482	0.0135876	0.0115552	0.0144017	0.0252265	0.0175931	0.00776905	0.0088597	0.0141353	0.00692219	0.0137313	0.00988356	0.0239666	0.0216707	0.0209452	0.0131337	0.0104035	0.0188147	0.0145986	0.009205	0.0201806	0.0148292
1160						264.934	881.771	0.0473758	0.0509008	0.0616396	0.0465585	0.0445446	0.0579459	0.0645798	0.0461334	0.0541576	0.0659061	0.0580555	0.0563403	0.0570271	0.0525491	0.0453816	0.0531842	0.0408286	0.0673007	0.045078	0.0504415	0.0532964	0.0373429	0.0635556	0.057776	0.069136	0.0470771	0.0453058	0.0541526	0.0535365	0.0567046	0.0534418	0.0545317	0.0572666	0.0527523	0.0455815	0.0479909	0.055662	0.0645166	0.0455397	0.0591859	0.054567	0.0537811
1464						311.934	881.77	0.0498684	0.0650003	0.05513	0.0351505	0.0524985	0.0600724	0.0538051	0.0523569	0.0570519	0.0531757	0.0548938	0.0408691	0.0518868	0.0514477	0.0384832	0.0579132	0.0466666	0.0478553	0.0533705	0.0537959	0.0515646	0.0577652	0.0498648	0.0323118	0.0516906	0.046849	0.0601703	0.0494953	0.0480451	0.00101371	0.0498596	0.0536719	0.0437526	0.04768	0.0568884	0.0533338	0.0407401	0.0524447	0.0437637	0.0514094	0.0566206	0.0473685
7731						860.848	881.77	0.211392	0.274193	0.235402	0.234446	0.234126	0.261558	0.229749	0.252753	0.25907	0.253068	0.261649	0.255978	0.218311	0.222044	0.219174	0.232386	0.257565	0.223365	0.233586	0.237335	0.240358	0.232835	0.247052	0.219068	0.249421	0.191057	0.234869	0.210753	0.241462	0.254024	0.238774	0.225888	0.242595	0.218051	0.247834	0.233527	0.211014	0.267424	0.235243	0.218072	0.236344	0.232765
3989						582.879	881.769	0.519901	0.756703	0.62351	0.573915	0.602804	0.627507	0.610453	0.642161	0.723118	0.633473	0.704574	0.645844	0.620385	0.622377	0.652866	0.604788	0.658822	0.603523	0.676524	0.584822	0.634403	0.627514	0.579041	0.617113	0.673657	0.579873	0.617545	0.53296	0.697504	0.649687	0.642085	0.593801	0.575098	0.593415	0.61486	0.592747	0.599983	0.688099	0.633191	0.565127	0.710908	0.61921
4733						651.872	881.769	0.0248492	0.0470939	0.0364037	0.0222886	0.0411525	0.0341339	0.0246612	0.0490158	0.0433685	0.0339428	0.0499077	0.0237487	0.0307198	0.0292536	0.0323818	0.047068	0.0271029	0.0380524	0.0386319	0.0248045	0.0349291	0.0341675	0.0293807	0.0313684	0.037988	0.0291832	0.0504536	0.0311392	0.0295201	0.016925	0.0292795	0.0427116	0.0447197	0.0294596	0.0290122	0.0328788	0.0277802	0.0351998	0.0273093	0.0196989	0.0264062	0.0317291
2053						379.921	881.769	0.0778501	0.0929356	0.102783	0.0665959	0.0825362	0.0816835	0.0827684	0.0854299	0.100719	0.0869391	0.100926	0.0884842	0.0813026	0.0836736	0.0743807	0.0848092	0.103255	0.0895167	0.09761	0.0743249	0.0869261	0.0837968	0.0798619	0.080027	0.095481	0.0806251	0.0884208	0.0708707	0.0948744	0.0917441	0.0991862	0.0818187	0.0882717	0.0886159	0.0890571	0.0700557	0.0843441	0.103023	0.0882211	0.0739435	0.0804824	0.0856361
3804						566.903	881.769	0.0755876	0.178913	0.0957851	0.058921	0.0962136	0.0804888	0.0823622	0.0866587	0.0886707	0.0936957	0.0936358	0.0805634	0.0854576	0.0730687	0.0829777	0.08058	0.0856041	0.0849246	0.0740319	0.0910602	0.08846	0.0890844	0.0791351	0.0762514	0.0797735	0.0825635	0.0817344	0.0704537	0.0924269	0.0897058	0.0826432	0.0869633	0.0949846	0.0783304	0.0816525	0.0760095	0.0825811	0.0862964	0.0776106	0.0603888	0.0903473	0.0819468
1970						372.901	881.768	0.0260251	0.0328096	0.0464618	0.0195747	0.0334241	0.0230347	0.03479	0.0335482	0.0348483	0.0372461	0.0391634	0.0315213	0.0331533	0.0344887	0.041087	0.0306528	0.0336362	0.034567	0.026614	0.0300796	0.0328363	0.0249048	0.0340345	0.0384882	0.037989	0.0286189	0.029254	0.0317791	0.0340806	0.0276656	0.0246789	0.0300485	0.0388288	0.0257817	0.0256636	0.0336021	0.0361085	0.0378023	0.0214119	0.0352977	0.0299402	0.0312989
2383						420.906	881.768	0.11576	0.124549	0.138329	0.107895	0.127463	0.108068	0.127375	0.131889	0.146765	0.124729	0.127916	0.125769	0.132866	0.135619	0.129977	0.122145	0.130064	0.133366	0.140017	0.130896	0.128073	0.121399	0.12007	0.123421	0.126681	0.111477	0.120333	0.116347	0.144144	0.128963	0.130984	0.116592	0.116401	0.124325	0.120697	0.107009	0.112476	0.137945	0.123162	0.114319	0.136015	0.122638
5767						725.876	881.767	0.098912	0.123272	0.0973177	0.0917119	0.0982481	0.098932	0.098175	0.106741	0.11411	0.100118	0.110847	0.103582	0.104121	0.0917523	0.0889953	0.105677	0.0908957	0.0995992	0.0890853	0.101083	0.100659	0.0994395	0.0987211	0.0908636	0.102601	0.100076	0.100416	0.0929589	0.106418	0.0966173	0.094325	0.105889	0.0990089	0.0949933	0.100669	0.0999921	0.0893886	0.133716	0.119164	0.0996004	0.107162	0.101601
615						174.956	881.765	6.03436	7.29377	5.55462	4.93494	6.28122	5.54949	6.44725	6.47243	7.13131	6.51545	7.32362	6.58541	6.45507	6.38587	6.35102	5.47605	6.73345	6.22955	5.65754	5.95982	6.26861	5.57694	5.26875	5.97548	5.60865	6.2877	6.34241	4.87736	5.67009	5.92451	5.98603	5.13321	5.40137	6.60685	6.2416	5.13502	6.34588	6.80057	5.57971	5.02145	5.84562	5.78146
4084						590.901	881.765	0.0879868	0.124798	0.096198	0.0968242	0.106272	0.106043	0.101611	0.124212	0.117755	0.096129	0.123344	0.10887	0.113195	0.122884	0.115526	0.106919	0.113854	0.108956	0.108287	0.124124	0.110189	0.0969597	0.107967	0.100124	0.121109	0.0981042	0.103085	0.0944216	0.114991	0.117966	0.101921	0.105675	0.107751	0.0965781	0.107586	0.104017	0.1139	0.120319	0.114756	0.099047	0.110454	0.106837
4720						650.867	881.764	0.357248	0.494009	0.428442	0.37348	0.400282	0.447171	0.429319	0.440341	0.483731	0.406527	0.472724	0.428702	0.391304	0.417776	0.43351	0.419047	0.465297	0.393492	0.438335	0.388363	0.425455	0.429126	0.416629	0.405277	0.429976	0.371222	0.425486	0.364827	0.470105	0.44519	0.419038	0.403734	0.398336	0.401905	0.418108	0.419588	0.3864	0.439956	0.425288	0.396162	0.454619	0.416049
1457			3,3-Dibromo-2-n-hexylacrylic acid	6.12658		310.931	881.763	0.995809	1.30237	1.152	1.06999	1.11878	1.15996	1.09591	1.1696	1.26614	1.10027	1.22415	1.1596	1.17119	1.09919	1.13009	1.17244	1.2413	1.12793	1.1103	1.13832	1.15027	1.14203	1.09822	1.05325	1.22319	1.05141	1.16873	1.04899	1.20789	1.23359	1.05956	1.06471	1.04978	1.12686	1.03514	1.08158	1.06874	1.22772	1.21327	1.09187	1.16002	1.12033
1658						332.922	881.763	0.110686	0.138518	0.115751	0.116534	0.126053	0.13058	0.119343	0.12191	0.132199	0.1191	0.129713	0.123614	0.123071	0.12867	0.126007	0.123167	0.140017	0.120565	0.126999	0.118221	0.124536	0.113336	0.118412	0.112346	0.131663	0.112994	0.131383	0.105017	0.13148	0.134911	0.123684	0.111196	0.112825	0.131194	0.124173	0.118266	0.117256	0.140642	0.134922	0.112159	0.124522	0.122119
3192						514.893	881.763	0.757416	0.945623	0.855683	0.789864	0.839682	0.851195	0.828078	0.851766	0.955086	0.870145	0.917241	0.823483	0.807506	0.77272	0.855116	0.84582	0.903608	0.837727	0.841593	0.83516	0.849226	0.819564	0.823936	0.754992	0.918613	0.787275	0.862146	0.732545	0.878091	0.908215	0.825634	0.833361	0.818846	0.790763	0.798562	0.748276	0.787369	0.903808	0.902834	0.768339	0.893011	0.827809
150						112.985	881.76	11.6928	22.7769	14.003	18.1348	13.9219	14.2776	22.3419	14.8529	22.5257	21.7536	22.0016	14.1798	13.9197	13.9777	19.4872	13.7851	14.687	14.1115	13.7881	13.8028	16.5011	14.0821	13.683	19.4074	13.9512	12.8125	21.0247	12.2831	14.1855	14.6593	13.6233	12.9357	13.7835	21.5039	14.0876	13.0238	19.0982	22.6458	14.4438	12.4945	14.4038	15.4066
2580						446.905	881.76	0.854686	1.07675	0.987706	0.894805	0.930268	0.991526	0.902821	0.979134	1.07292	0.938194	1.04864	0.926542	0.925344	0.904754	0.90469	0.968665	1.00228	0.956592	0.960021	0.923567	0.957495	0.928408	0.936833	0.890858	1.05314	0.893169	0.961408	0.840536	0.99255	1.02572	0.945883	0.90238	0.953464	0.944278	0.931527	0.847857	0.931858	1.03196	1.02306	0.898201	1.02803	0.948056
4825						657.887	881.76	0.140167	0.19183	0.173785	0.155612	0.17914	0.179814	0.152256	0.168718	0.189296	0.177015	0.194932	0.175708	0.156155	0.164394	0.150377	0.157618	0.178029	0.154135	0.16976	0.170246	0.168949	0.163128	0.15411	0.164998	0.175918	0.136432	0.170918	0.152837	0.177458	0.173447	0.161735	0.161807	0.148952	0.170518	0.160394	0.157136	0.165162	0.189084	0.186226	0.163214	0.169405	0.165144
4837						658.889	881.76	0.0529337	0.0551522	0.0602095	0.057058	0.055564	0.0576176	0.0644013	0.0539425	0.0510931	0.0531906	0.0693426	0.0600837	0.00284266	0.0443697	0.0602907	0.0485825	0.0526942	0.0586439	0.0489997	0.0456667	0.0526339	0.0489768	0.061149	0.0535927	0.0502842	0.043454	0.0530141	0.0455714	0.0596496	0.0558207	0.0553419	0.0557298	0.0614168	0.0488047	0.0464132	0.0520927	0.0507375	0.055629	0.0546565	0.0412962	0.0373265	0.0515479
5743						724.872	881.76	0.729115	1.02186	0.920865	0.826623	0.818022	0.880185	0.860403	0.894977	1.00776	0.859805	0.949786	0.90041	0.831932	0.854881	0.873207	0.820523	0.905317	0.858171	0.85693	0.846986	0.875888	0.869208	0.790547	0.815867	0.874275	0.746263	0.862982	0.75491	0.920267	0.87712	0.877093	0.811793	0.819829	0.789893	0.862144	0.837411	0.825558	0.940693	0.904147	0.818684	0.920217	0.845945
6715						792.858	881.759	0.393326	0.569363	0.508597	0.441306	0.456365	0.49331	0.456481	0.48606	0.534589	0.475929	0.539887	0.514777	0.453098	0.4712	0.492728	0.45626	0.489128	0.45319	0.500629	0.464943	0.482558	0.46372	0.468014	0.463525	0.502808	0.405492	0.471504	0.411454	0.527095	0.511274	0.469563	0.442455	0.455008	0.429766	0.486706	0.457826	0.452513	0.544737	0.50023	0.428777	0.525526	0.4709
1393						304.914	881.756	0.0899857	0.098936	0.084645	0.0856818	0.0883339	0.0786532	0.07231	0.0956436	0.10572	0.089094	0.0931319	0.094497	0.0887322	0.0846749	0.0809959	0.0885777	0.105972	0.0850774	0.0926876	0.0864231	0.0894886	0.0839063	0.0897909	0.0846269	0.100111	0.0802229	0.0929434	0.0789965	0.0915472	0.0927489	0.081041	0.0873078	0.0888278	0.0957936	0.0860757	0.0778744	0.0799107	0.100213	0.101438	0.0970076	0.0933641	0.0891874
3031						498.915	881.753	0.0874347	0.233996	0.100631	0.0901619	0.0962596	0.0977651	0.0842701	0.1059	0.11378	0.0918232	0.0990826	0.102755	0.0852553	0.100056	0.110018	0.102249	0.102819	0.10237	0.100438	0.0851136	0.104609	0.107555	0.102503	0.0946151	0.105608	0.0899552	0.109603	0.0818553	0.107095	0.100613	0.0954987	0.0782465	0.0907816	0.0941212	0.0935018	0.0891309	0.0966604	0.100542	0.100789	0.0911656	0.0898936	0.0959867
2221						400.909	881.751	0.148068	0.174169	0.156302	0.152714	0.155504	0.161609	0.147401	0.162652	0.172791	0.150718	0.153113	0.17385	0.152435	0.156319	0.142858	0.149637	0.165929	0.154773	0.159627	0.152392	0.157143	0.143361	0.1497	0.137484	0.166573	0.150895	0.150458	0.132814	0.15682	0.161282	0.165165	0.16327	0.152694	0.154131	0.151128	0.159459	0.151164	0.167241	0.170621	0.137555	0.165807	0.154381
3363						522.914	881.751	0.108743	0.152265	0.142911	0.119349	0.120814	0.140309	0.130459	0.115294	0.156729	0.130187	0.135814	0.131472	0.131534	0.135922	0.12602	0.121901	0.139526	0.127459	0.121885	0.121672	0.130513	0.132264	0.133185	0.121321	0.134776	0.111593	0.125797	0.116604	0.141131	0.13233	0.117503	0.10979	0.141988	0.120891	0.128155	0.130741	0.116522	0.14529	0.132914	0.117082	0.138754	0.127431
2787						468.895	881.747	0.170328	0.228044	0.212283	0.180915	0.197622	0.185487	0.21128	0.211998	0.221679	0.198127	0.228211	0.20113	0.194418	0.206333	0.220416	0.204493	0.198673	0.200533	0.219138	0.191617	0.204136	0.19291	0.209173	0.175588	0.204902	0.192053	0.204362	0.173528	0.232908	0.214864	0.191992	0.180454	0.199411	0.196607	0.206395	0.199437	0.208368	0.210062	0.223119	0.176557	0.227778	0.201023
1074						242.943	881.736	1.30625	1.62662	1.46828	1.35409	1.48684	1.42987	1.46175	1.55024	1.66133	1.43359	1.58691	1.46423	1.50938	1.47255	1.49319	1.54666	1.57446	1.43726	1.50326	1.41718	1.4892	1.46928	1.40475	1.37918	1.5766	1.40691	1.4796	1.27776	1.57914	1.53773	1.41182	1.39048	1.43525	1.45503	1.40893	1.43303	1.37812	1.55041	1.57943	1.41816	1.56532	1.45685
2038						378.918	881.736	1.20265	1.55497	1.42649	1.24726	1.41684	1.40957	1.36846	1.39676	1.60421	1.35933	1.52317	1.3438	1.40575	1.34999	1.29895	1.43044	1.53521	1.38793	1.40349	1.32019	1.39927	1.41797	1.39503	1.29004	1.53665	1.31747	1.43803	1.2289	1.47497	1.47949	1.33005	1.30353	1.41926	1.35237	1.24768	1.28345	1.32972	1.52062	1.48371	1.2878	1.47225	1.38045
2670						452.922	881.736	4.2639	5.87557	5.0572	4.55055	4.6531	5.23076	4.90812	5.13918	5.5126	5.00229	5.65134	5.02842	4.75215	4.9232	4.91937	4.8842	5.29683	4.92745	5.1965	4.82291	5.02978	5.02152	4.86238	4.8151	5.0548	4.51382	5.10725	4.31215	5.46724	5.30049	4.91426	4.67247	4.86635	4.69734	4.77217	4.91599	4.94649	5.45875	5.07063	4.51276	5.40209	4.9342
3348						521.912	881.736	0.295231	0.401731	0.358445	0.308848	0.331131	0.358044	0.332888	0.339954	0.394263	0.338713	0.378412	0.358052	0.337011	0.34341	0.348473	0.33847	0.370162	0.341421	0.369735	0.344069	0.349423	0.347092	0.326661	0.333393	0.333816	0.306465	0.356707	0.302225	0.382558	0.346104	0.365836	0.328219	0.304005	0.332053	0.318867	0.352022	0.343822	0.381919	0.347327	0.31721	0.369006	0.339765
4802						656.884	881.736	1.3001	1.7702	1.54089	1.3554	1.37046	1.52739	1.35067	1.52109	1.58715	1.48587	1.67299	1.46405	1.39869	1.43582	1.49568	1.46036	1.56415	1.44571	1.49373	1.43631	1.48384	1.49948	1.43937	1.44073	1.45795	1.31325	1.51826	1.31557	1.57508	1.57042	1.41179	1.41956	1.4111	1.38615	1.38791	1.42994	1.43779	1.63803	1.5339	1.36496	1.58974	1.45705
4056						588.897	881.736	2.44307	3.22093	2.82983	2.52523	2.68824	2.86798	2.64016	2.92369	3.0471	2.77761	3.05364	2.79147	2.68907	2.70724	2.70384	2.77558	2.95532	2.73445	2.79523	2.70077	2.79352	2.80432	2.7382	1.09116	2.97432	2.45831	2.8139	2.48083	2.94736	2.91672	2.67668	2.62322	2.66853	2.63007	2.62236	2.69505	2.65366	3.10426	2.92636	2.5527	2.98903	2.66835
4074						589.901	881.736	0.251034	0.358251	0.276485	0.279453	0.287816	0.282999	0.290716	0.303402	0.329348	0.287153	0.301297	0.289352	0.299757	0.275635	0.280181	0.278498	0.31265	0.287655	0.281613	0.274867	0.291408	0.287213	0.287784	0.270207	0.31965	0.255923	0.275588	0.260712	0.295221	0.316004	0.261713	0.288366	0.297904	0.268352	0.264124	0.259778	0.255539	0.313687	0.296172	0.268474	0.292584	0.28175
2456						430.927	881.718	0.130955	0.371601	0.143487	0.126491	0.140868	0.13848	0.143533	0.143453	0.17413	0.137833	0.147833	0.141034	0.13736	0.139338	0.127618	0.139226	0.147388	0.125179	0.14688	0.129466	0.151608	0.146227	0.122258	0.136217	0.14733	0.118841	0.145291	0.12076	0.164579	0.147412	0.138185	0.127249	0.135654	0.127476	0.141536	0.115854	0.135781	0.144325	0.150176	0.120847	0.14418	0.136509
284						130.966	881.701	0.0199276	0.0101935	0.0151874	0.013295	0.00587006	0.0166594	0.00852284	0.0116642	0.0139761	0.0184404	0.0136115	0.010182	0.0172862	0.0166075	0.0219391	0.00790264	0.0209279	0.0160974	0.0147554	0.014926	0.0143986	0.00883383	0.0107031	0.016156	0.0113402	0.00953635	0.0177346	0.0103137	0.0150765	0.00752544	0.0169537	0.00775827	0.0124059	0.0153231	0.0119167	0.0122965	0.0155857	0.0148563	0.00966356	0.0179696	0.0157933	0.0128871
2698						453.926	881.694	0.374665	0.452045	0.413032	0.346619	0.385995	0.401936	0.388476	0.382282	0.429122	0.38696	0.417018	0.374982	0.387186	0.387743	0.37583	0.399621	0.405974	0.386227	0.405227	0.387974	0.394446	0.394901	0.396141	0.365382	0.435488	0.365907	0.391217	0.354034	0.438301	0.41709	0.380607	0.374063	0.395961	0.378282	0.372447	0.400097	0.399496	0.41936	0.446289	0.357278	0.420008	0.395117
3309						520.91	881.694	3.39918	4.49263	3.93105	3.63297	3.66906	3.94835	3.60608	3.98292	4.19487	3.7995	4.19415	4.03928	3.64177	3.72538	3.66782	3.76769	4.08211	3.79544	3.79233	3.84885	3.86057	3.8463	3.78089	3.58571	4.12808	3.4429	3.83478	3.42374	4.02343	4.08577	3.68011	3.65402	3.71572	3.58345	3.59588	3.73649	3.71398	4.12376	4.03041	3.59196	4.04418	3.78108
2199						396.89	881.691	0.00230503	0.00514458	0.00774274	0.00396264	0.0075532	0.00437937	0.006177	0.00304362	0.0116258	0.00612705	0.0123513	0.00286152	0.00482029	0.00388709	0.00439514	0.00724284	0.0067426	0.00913102	0.00659128	0.00467167	0.00603779	0.00192038	0.0131971	0.00506716	0.00405582	0.00670697	0.00494922	0.00602701	0.00297977	0.0103455	0.00498987	0.00382806	0.00342534	0.00516416	0.00730828	0.00447687	0.00731249	0.00563394	0.0091284	0.00590012	3.74636e-05	0.0056227
2432						427.941	881.491	0.0314322	0.0337234	0.0198485	0.0328549	0.032132	0.0142903	0.0254652	0.0285775	0.0332308	0.0397841	0.0410827	0.0219713	0.0289831	0.0380164	0.0277556	0.0343354	0.032701	0.0265421	0.0353647	0.0247849	0.0301438	0.0339095	0.0308299	0.0169937	0.00635349	0.0313933	0.0388674	0.035207	0.0339328	0.0365931	0.0401255	0.0289419	0.03886	0.0347415	0.0394222	0.0168065	0.0347388	0.0368789	0.0382961	0.0267299	0.0377314	0.0318676
2712						454.926	881.484	0.123539	0.160341	0.156757	0.14452	0.146862	0.15256	0.135868	0.151079	0.183204	0.131954	0.17112	0.152641	0.130755	0.137554	0.144226	0.145358	0.156821	0.149236	0.152705	0.146923	0.148701	0.140195	0.144988	0.13758	0.147746	0.126214	0.141751	0.118693	0.145891	0.15742	0.162197	0.135889	0.139001	0.148029	0.149048	0.144548	0.131048	0.152751	0.157899	0.13614	0.153321	0.143517
2084						384.935	881.268	5.34816	7.09121	6.0269	5.66121	5.98455	6.19016	6.01366	6.30337	6.73487	5.99926	6.61245	6.30893	6.00095	6.17292	5.94789	5.92466	6.38115	5.96383	6.14552	5.9375	6.13746	6.06002	5.89953	5.65485	6.30715	5.48487	6.10466	5.2984	6.23482	6.47234	5.97654	5.67873	5.89539	5.732	6.01515	5.75537	5.77796	6.51104	6.32956	5.53858	6.32007	5.95235
1115						250.964	881.268	0.121804	0.151776	0.142439	0.136278	0.136357	0.149084	0.147724	0.145558	0.153393	0.134283	0.167059	0.132531	0.135626	0.127497	0.138629	0.142801	0.153876	0.13941	0.144195	0.145143	0.142273	0.145406	0.149069	0.138815	0.133717	0.139484	0.145938	0.127581	0.154399	0.151369	0.134056	0.142736	0.139799	0.130703	0.139621	0.135767	0.141337	0.15018	0.158257	0.129196	0.139396	0.141341
2096						385.938	881.266	0.352901	0.465321	0.421282	0.394004	0.394999	0.438934	0.390702	0.435505	0.481842	0.416287	0.46741	0.42317	0.384757	0.422789	0.421788	0.395769	0.423048	0.397678	0.420733	0.381619	0.416527	0.415204	0.405162	0.415098	0.425781	0.368958	0.411664	0.369158	0.431	0.425677	0.414754	0.405037	0.398935	0.399926	0.403326	0.41883	0.393549	0.443896	0.40194	0.358715	0.453983	0.40803
2104						386.939	881.265	0.137637	0.176694	0.132667	0.143236	0.142269	0.151894	0.146027	0.160907	0.171056	0.162679	0.164712	0.155776	0.144249	0.145416	0.160947	0.136654	0.159653	0.135936	0.162423	0.146833	0.151883	0.137353	0.14873	0.145209	0.157321	0.132392	0.160024	0.132217	0.159702	0.162868	0.148192	0.142912	0.157056	0.139753	0.145695	0.136485	0.146597	0.161219	0.163275	0.13885	0.159512	0.148768
1754						346.958	881.264	0.0291448	0.0296419	0.0534974	0.0295029	0.044852	0.0582692	0.0430048	0.0491799	0.0492929	0.0461375	0.0569006	0.0508107	0.0419005	0.0471653	0.0402964	0.0354039	0.0370743	0.0450902	0.0394909	0.0379852	0.0432321	0.043611	0.0395649	0.0397513	0.0224592	0.0447195	0.00848415	0.0411689	0.0413094	0.0494819	0.0290515	0.0462809	0.0354537	0.0481441	0.0329624	0.0206694	0.0389734	0.0177958	0.0475469	0.032948	0.0411157	0.0360746
1552						316.947	881.264	7.97628	9.79744	8.82909	7.85529	8.50052	8.66379	8.94057	8.80721	9.47771	8.31212	9.54616	8.87476	8.4354	9.23379	8.92135	8.21457	8.84921	8.72497	9.09587	8.66483	8.78605	8.39922	8.2801	8.29844	8.89593	8.31888	8.40507	7.40625	9.35613	8.79372	8.4994	7.95858	8.1372	8.07958	8.52153	8.25811	8.4926	9.45932	9.08534	7.89028	9.26732	8.49015
1561						317.951	881.264	0.443619	0.579452	0.512211	0.509401	0.515733	0.509616	0.498384	0.565567	0.59355	0.491886	0.527014	0.507493	0.532852	0.532739	0.513852	0.492332	0.58166	0.509857	0.52398	0.505562	0.522338	0.514136	0.497765	0.460895	0.558983	0.468162	0.517465	0.469723	0.549865	0.532777	0.48722	0.481726	0.486439	0.522072	0.491466	0.469628	0.478944	0.560217	0.562829	0.48114	0.497408	0.504443
656						181.976	881.264	0.120796	0.151619	0.139442	0.11359	0.13259	0.134623	0.140667	0.146113	0.158877	0.135361	0.148186	0.133509	0.133066	0.133632	0.1291	0.131676	0.147837	0.132641	0.143197	0.13403	0.137028	0.120836	0.132322	0.131134	0.128295	0.122164	0.122363	0.119523	0.125631	0.143743	0.130603	0.131814	0.138959	0.122974	0.132222	0.111591	0.133906	0.146657	0.138949	0.112037	0.146227	0.129597
1569						318.952	881.264	0.169308	0.19138	0.174216	0.160126	0.178289	0.179064	0.171322	0.165763	0.187118	0.157579	0.198219	0.16423	0.174907	0.167676	0.158604	0.179817	0.181578	0.165663	0.182787	0.160555	0.17341	0.178381	0.178081	0.173684	0.162956	0.160986	0.184243	0.157908	0.178234	0.190469	0.169761	0.158421	0.15841	0.161093	0.146246	0.162454	0.173556	0.173789	0.198812	0.156787	0.182735	0.17035
3014						495.928	881.264	0.0154467	0.0101921	0.0236261	0.0207365	0.0174906	0.024696	0.0100457	0.0254824	0.0281982	0.0198964	0.0234013	0.024905	0.0178668	0.0205398	0.0203264	0.0291735	0.015517	0.0129295	0.022477	0.0165257	0.0199736	0.0186511	0.0188372	0.0188493	0.0294552	0.0128803	0.0176464	0.0131342	0.0141895	0.0170793	0.0317947	0.0142856	0.0152293	0.012714	0.0260738	0.0230689	0.0200501	0.0231316	0.0130407	0.0197337	0.0182395	0.0189042
1105						248.96	881.263	7.85194	9.81611	8.8115	8.45972	8.93339	9.06584	8.93795	9.25627	9.77503	8.91671	9.54596	9.06074	8.9294	8.64561	8.74917	8.97884	9.52088	8.7337	8.71054	8.79942	8.97494	8.74187	9.052	8.1857	9.28547	8.12582	8.93057	7.90619	9.43902	9.17464	8.66992	8.53973	8.55035	8.72638	8.60623	8.05098	8.35222	9.30244	9.57738	8.45005	9.1037	8.73853
348						142.996	881.263	0.0318834	0.0414297	0.0777902	0.0223811	0.0281719	0.0507185	0.025333	0.0191631	0.0395777	0.0357341	0.0687776	0.0488555	0.0384629	0.0291556	0.031303	0.0331846	0.0222771	0.047935	0.0329612	0.0521474	0.0388621	0.0199547	0.0484019	0.0351886	0.0446176	0.0311521	0.0294064	0.0241822	0.0555817	0.0341108	0.0447458	0.0182208	0.0319756	0.0299042	0.0180164	0.0248754	0.0157632	0.0124116	0.025119	0.0304504	0.0500915	0.0312085
773						203.06	881.262	0.101506	0.122038	0.115065	0.103272	0.126917	0.110716	0.122639	0.122035	0.128191	0.101239	0.100855	0.105979	0.108398	0.0987753	0.111177	0.116462	0.133214	0.115467	0.115159	0.0896057	0.112435	0.102958	0.106787	0.0833903	0.144893	0.105433	0.11637	0.0946663	0.100373	0.131148	0.12201	0.115916	0.123863	0.105669	0.101225	0.101508	0.0892953	0.116876	0.131214	0.100441	0.120514	0.110727
1495						313.948	881.262	0.00862505	0.0108313	0.0171649	0.00959858	0.00879649	0.0148352	0.0154721	0.00563686	0.0163888	0.0122827	0.0184608	0.00645023	0.0078125	0.0101934	0.0116055	0.0161701	0.0149788	0.0134878	0.00756737	0.0120663	0.0119212	0.0167389	0.00997995	0.0105296	0.00882249	0.0136139	0.0129875	0.0171595	0.00941699	0.0131089	0.0118592	0.0113814	0.0140311	0.00875419	0.00673067	0.00948332	0.0153524	0.019762	0.016776	0.0112314	0.0116387	0.0124679
2997						494.91	881.262	0.446366	0.554718	0.471003	0.431688	0.426643	0.479261	0.452634	0.505993	0.489036	0.495574	0.543582	0.4713	0.437449	0.461052	0.443588	0.50383	0.457563	0.465659	0.428629	0.496887	0.473123	0.438801	0.478758	0.42101	0.518486	0.428607	0.526758	0.410178	0.511134	0.504622	0.444215	0.469454	0.444857	0.444456	0.483399	0.477699	0.466294	0.481831	0.471972	0.49308	0.460067	0.468784
158						113.989	881.26	0.265201	0.337831	0.278244	0.278099	0.429632	0.280288	0.476672	0.294739	0.315584	0.442353	0.325226	0.305292	0.279659	0.289104	0.419861	0.276522	0.302421	0.274938	0.29324	0.39355	0.327923	0.274191	0.297124	0.263904	0.304215	0.272034	0.291436	0.242259	0.30824	0.299129	0.286442	0.280598	0.289532	0.390621	0.276663	0.289149	0.307213	0.290714	0.312572	0.273811	0.447317	0.299858
645						180.973	881.26	3.52598	4.50166	4.0269	3.81089	3.96721	4.07586	4.0323	4.33975	4.34712	4.00171	4.33404	4.15673	4.05548	3.99228	4.08039	4.00011	4.35416	3.92025	3.97965	3.97166	4.07371	4.05028	3.97811	3.76307	4.18951	3.67447	4.04934	3.50255	4.33027	4.1623	3.90059	3.81755	3.8061	3.95326	3.97809	3.76381	3.8184	4.18303	4.2614	3.75454	4.12972	3.95332
1859						359.953	881.251	0.0233212	0.0382194	0.0528668	0.0413699	0.0394253	0.031026	0.0369615	0.0361196	0.0303933	0.0126778	0.0375102	0.0183469	0.0368488	0.0376635	0.0348412	0.0313676	0.0250171	0.0333789	0.0276702	0.0295842	0.0327305	0.0281848	0.0145977	0.00916353	0.0333935	0.0420031	0.0294167	0.0391157	0.0406368	0.0357715	0.0195091	0.0373048	0.0317334	0.0390183	0.0393539	0.0380787	0.0392015	0.0387426	0.0330267	0.0297456	0.0223061	0.0320152
1807						352.919	881.245	0.112856	0.106974	0.0967512	0.101289	0.110731	0.115367	0.106669	0.114009	0.127403	0.0994359	0.111732	0.0979811	0.0459439	0.100721	0.103777	0.109342	0.0900677	0.107498	0.112721	0.104641	0.103795	0.110176	0.102741	0.0979591	0.11412	0.104408	0.113391	0.0946773	0.123848	0.10072	0.0990286	0.0968902	0.113644	0.114908	0.102381	0.0975688	0.096015	0.11823	0.120826	0.10915	0.109286	0.106998
1109						249.964	881.234	0.365427	0.457247	0.382539	0.380633	0.406614	0.405621	0.431474	0.423544	0.459498	0.424324	0.442661	0.391829	0.402239	0.40487	0.373561	0.407934	0.42514	0.404955	0.412463	0.420947	0.411176	0.426403	0.42396	0.372555	0.42494	0.393346	0.408858	0.36269	0.44863	0.445325	0.398688	0.383783	0.382324	0.410848	0.42537	0.383037	0.382177	0.429033	0.419279	0.381382	0.426766	0.40647
471						161.013	881.233	0.0571778	0.141943	0.0349634	0.0548196	0.0389225	0.0515842	0.0154071	0.0337892	0.0582971	0.039995	0.0211489	0.020858	0.0343457	0.0392872	0.0417941	0.0223946	0.0436153	0.0265613	0.0304145	0.0567101	0.0432014	0.0536295	0.0222149	0.0390485	0.0428907	0.0565114	0.0542905	0.0195218	0.0623027	0.0546076	0.036713	0.0530471	0.0207235	0.0220667	0.0578536	0.0287497	0.0302192	0.052541	0.0487491	0.0545243	0.0308383	0.0420522
450						155.991	881.213	0.0345927	0.0431942	0.0508661	0.0329113	0.0402384	0.0653918	0.0441151	0.0429841	0.0575186	0.0431462	0.0513293	0.0422558	0.0328625	0.0520691	0.0314128	0.0501653	0.0405242	0.0473785	0.0415449	0.0359921	0.0440246	0.0490666	0.0263562	0.038744	0.0335301	0.0395035	0.0426091	0.00373621	0.0427846	0.0441131	0.05054	0.0462275	0.0525322	0.0496215	0.0555231	0.0366721	0.0533727	0.0379575	0.0475352	0.0300011	0.0509722	0.0415699
1282						291.966	881.213	0.00878116	0.0185822	0.00683932	0.0147815	0.0154427	0.0218788	0.0215662	0.0157925	0.0259155	0.0256028	0.0290097	0.0107317	0.0196377	0.0264508	0.025672	0.029637	0.0240819	0.0172618	0.0212079	0.0198357	0.0199354	0.0129895	0.0204895	0.0177056	0.0156925	0.0191648	0.0184354	0.0214915	0.0252648	0.0185267	0.0150022	0.0280562	0.0179891	0.0226474	0.0278462	0.0178925	0.0184476	0.0282639	0.0186973	0.0254147	0.0203157	0.0205167
2315						412.923	881.21	0.0211019	0.0207383	0.0309058	0.0211505	0.0271793	0.0206194	0.0156947	0.0135291	0.0416765	0.0324207	0.0168796	0.0203445	0.0176764	0.0367204	0.0163525	0.031093	0.0329263	0.0329153	0.00821407	0.0207067	0.0239423	0.0262943	0.0224259	0.0300305	0.0227477	0.0177535	0.0345761	0.0252803	0.0230976	0.0315014	0.0236053	0.0063215	0.0207744	0.0284505	0.0156001	0.0188186	0.0206384	0.0259621	0.0300018	0.014384	0.0156787	0.0226971
2331						414.946	881.177	0.0191303	0.0373391	0.0298695	0.0203684	0.0224479	0.0272867	0.0378631	0.0355993	0.0409798	0.0225327	0.0210457	0.0277153	0.020188	0.0203087	0.022056	0.0339525	0.0187284	0.0322867	0.0305899	0.0172288	0.0268758	0.0225209	0.0303578	0.0282714	0.0324066	0.0213816	0.0303171	0.025577	0.0261653	0.0174944	0.0400841	0.0191595	0.0272356	0.0252542	0.0235253	0.0126793	0.019618	0.0283252	0.0297116	0.00950686	0.0144523	0.0242022
711						189.008	881.169	0.678413	0.953695	0.802731	0.695969	0.885344	0.764983	0.894899	0.796052	0.931244	0.742452	0.800183	0.794981	0.781058	0.69155	0.741829	0.777721	0.915628	0.8986	0.794818	0.687893	0.801502	0.729688	0.806768	0.708121	0.855841	0.669747	0.778066	0.664699	0.939043	0.825803	0.776777	0.733268	0.751635	0.729706	0.791212	0.71095	0.752712	0.796298	0.823531	0.752345	0.795884	0.769605
2419						426.922	881.15	0.502265	0.551197	0.52197	0.506399	0.469124	0.588142	0.518182	0.499411	0.54798	0.590818	0.557872	0.501485	0.485867	0.50317	0.490633	0.589911	0.628395	0.492065	0.503145	0.49285	0.527044	0.483352	0.477509	0.5032	0.508902	0.536627	0.48287	0.433612	0.552155	0.534206	0.466194	0.449539	0.497221	0.484289	0.490173	0.485129	0.538065	0.628706	0.503558	0.445403	0.525063	0.501289
1212						278.97	881.145	0.0215432	0.0300497	0.0210839	0.0249643	0.0307886	0.0292765	0.0252282	0.0268426	0.0434641	0.0364448	0.035834	0.0364614	0.018632	0.0255783	0.0203376	0.0239274	0.0240128	0.0322465	0.0304172	0.0263237	0.0281728	0.0260565	0.0271122	0.0263906	0.0306667	0.0353756	0.0288154	0.0299501	0.0363664	0.0289422	0.0355678	0.030219	0.0296346	0.0347643	0.0315373	0.0238338	0.0305774	0.0223588	0.0371545	0.01594	0.0290468	0.0295155
1742						344.935	881.139	0.0347579	0.0584151	0.0479902	0.0523891	0.0557018	0.0528365	0.0520104	0.0552403	0.0627235	0.0597572	0.0535137	0.04284	0.0507981	0.0492016	0.0570789	0.0507151	0.0527156	0.0513403	0.0444095	0.0424633	0.0513449	0.0477248	0.0226308	0.0329912	0.0557057	0.0520875	0.0350008	0.0523352	0.0530818	0.0564195	0.0432834	0.0487708	0.0519117	0.056616	0.0490071	0.0493793	0.0436174	0.0395907	0.0555796	0.0429535	0.0373319	0.0463009
1247						284.931	880.675	0.0529653	0.0614697	0.0602899	0.0442937	0.0435444	0.0469491	0.0551781	0.0561242	0.061534	0.0428344	0.0539876	0.0524387	0.0575317	0.0523983	0.0458922	0.0694904	0.0614608	0.0549937	0.0578636	0.0428265	0.0537033	0.0440096	0.0561047	0.026202	0.0606733	0.0529568	0.0446023	0.0536012	0.0590591	0.0567681	0.0348331	0.0475167	0.0606825	0.0456961	0.0525387	0.0567269	0.0661946	0.0622448	0.0438274	0.04445	0.0466651	0.0507676
6970						809.849	880.638	0.0320792	0.0593965	0.0295411	0.031329	0.0497381	0.0482164	0.0288001	0.0522987	0.0445792	0.0413601	0.0476793	0.0380456	0.0370408	0.0445592	0.0384951	0.0470676	0.0508019	0.036446	0.0376035	0.043316	0.0419197	0.0397945	0.0408932	0.0380091	0.0421154	0.0312317	0.0437967	0.0237655	0.036329	0.0501056	0.0404137	0.0375424	0.0397097	0.0418035	0.0312836	0.0445966	0.0327859	0.0462645	0.04094	0.0351007	0.0338151	0.0385148
7587						850.817	880.214	0.0301981	0.0498292	0.0342463	0.036606	0.0401743	0.0536822	0.0324527	0.0302922	0.0199794	0.0466623	0.0469304	0.0499109	0.0326098	0.0328302	0.0275809	0.0407571	0.0376638	0.0235897	0.0450315	0.0260556	0.0368541	0.0282465	0.0369692	0.0280644	0.0424962	0.02949	0.0264207	0.0348978	0.0334325	0.0197995	0.0382376	0.0292308	0.0199361	0.0197522	0.0203575	0.0509594	0.0371219	0.0451215	0.0371237	0.0333522	0.0196702	0.031534
6588						782.831	880.196	0.0730004	0.0967838	0.0843776	0.0769335	0.0839869	0.101959	0.0879764	0.0830319	0.102246	0.0855388	0.100449	0.084873	0.0872943	0.0800235	0.0816682	0.0827696	0.0704213	0.0818029	0.0938455	0.0793387	0.085916	0.0794327	0.096194	0.0638725	0.0936579	0.0719858	0.0721409	0.0795874	0.0938969	0.0775238	0.0856338	0.086548	0.0720128	0.0672681	0.0868338	0.0863438	0.081503	0.0794911	0.0997861	0.0685935	0.0852445	0.0813775
3061						502.891	880.141	0.0161971	0.0315619	0.0160601	0.0159275	0.019816	0.0193943	0.0199153	0.0240551	0.00959749	0.0275666	0.0144167	0.0190461	0.0173703	0.0123435	0.00999301	0.0159077	0.0170437	0.0222899	0.0166884	0.0206852	0.0182938	0.0331107	0.0197926	0.0124484	0.0144444	0.0218586	0.019622	0.0182186	0.0198145	0.015046	0.00752553	0.0169377	0.0241937	0.0215791	0.00954464	0.0193514	0.0233102	0.0221564	0.0218649	0.0157867	0.00793157	0.0182269
2437			DNDS	-22.5933		428.961	880.14	0.0179144	0.0297962	0.0227313	0.0229711	0.0231014	0.0320696	0.0408009	0.0253919	0.0402481	0.0341275	0.0320038	0.0180562	0.0338592	0.0104973	0.0207083	0.035302	0.0296656	0.0171094	0.027019	0.0176582	0.0265516	0.0107611	0.0308847	0.0209325	0.0199045	0.0283904	0.0326212	0.020429	0.0305985	0.0284379	0.0104773	0.0186691	0.030646	0.0107897	0.0392918	0.0200256	0.0260171	0.0397092	0.0202621	0.0252746	0.0245771	0.024435
3855						572.851	880.131	0.048895	0.0626941	0.046743	0.0335039	0.0420669	0.0410637	0.0519093	0.0348562	0.0452756	0.0430413	0.0684178	0.0537733	0.0432152	0.0429028	0.0384243	0.050427	0.0423465	0.057902	0.037883	0.0350634	0.0460202	0.0423076	0.0344235	0.0476131	0.0543351	0.0420539	0.0453359	0.0424816	0.0586407	0.0373965	0.0426664	0.0404024	0.0539306	0.0410162	0.047493	0.0457561	0.0523669	0.0515739	0.0498998	0.0414772	0.0531797	0.0462175
5583						714.844	880.13	0.119531	0.161485	0.165903	0.139893	0.152109	0.161061	0.145751	0.15882	0.167931	0.154178	0.165959	0.159956	0.138958	0.158647	0.187287	0.136646	0.165462	0.148016	0.156843	0.157781	0.155111	0.119492	0.144005	0.165712	0.161094	0.136462	0.151405	0.142252	0.172439	0.172583	0.154422	0.151074	0.144293	0.143847	0.157503	0.161117	0.148468	0.152537	0.167248	0.136639	0.158362	0.152048
4209						599.87	880.127	0.0181313	0.0378568	0.0365508	0.0251415	0.028472	0.020988	0.0265132	0.0206052	0.034248	0.0291308	0.0287679	0.0342355	0.0278876	0.0234139	0.0282299	0.0196397	0.0390188	0.0318525	0.0182321	0.0305691	0.0279742	0.0300099	0.0251305	0.0245177	0.0286543	0.0310697	0.031161	0.0239203	0.0270612	0.0171176	0.0294474	0.0251876	0.0321371	0.0314851	0.0350533	0.0263224	0.0235697	0.0369964	0.0167308	0.0226036	0.0176584	0.0267917
6001						741.862	880.121	0.0680248	0.103152	0.0868911	0.072532	0.0906107	0.0916203	0.0938181	0.0770977	0.101491	0.0926255	0.0919639	0.0839227	0.0867897	0.078633	0.0709471	0.0915281	0.0925494	0.0699413	0.0848383	0.0684451	0.0848711	0.0825528	0.0745474	0.0773811	0.0834533	0.0794241	0.0943345	0.0721743	0.0805011	0.0856182	0.0786577	0.0722894	0.0803416	0.0761227	0.08211	0.0786931	0.0828116	0.0846078	0.0859846	0.0708468	0.0923267	0.0807389
3020						496.948	880.119	0.0122135	0.019833	0.0224258	0.0155797	0.0198986	0.019059	0.0165605	0.0159065	0.0234399	0.0187172	0.0245673	0.0112959	0.00730769	0.00311502	0.00749023	0.00836325	0.0231917	0.0180511	0.0130938	0.0140438	0.0157077	0.0188135	0.00951242	0.0183806	0.0198871	0.0176625	0.0275506	0.0177517	0.0132036	0.0113516	0.0122441	0.0179611	0.0107873	0.0149756	0.0135965	0.0116327	0.0220342	0.0169496	0.0224228	0.0140124	0.0176295	0.016418
5020						673.876	880.113	0.133941	0.181853	0.149893	0.136789	0.153544	0.164769	0.156941	0.149684	0.153875	0.157961	0.154081	0.142441	0.148008	0.128213	0.147533	0.137845	0.139379	0.14809	0.137559	0.152606	0.14875	0.150733	0.148219	0.150276	0.145026	0.126866	0.143467	0.120264	0.170366	0.164788	0.142046	0.137884	0.139423	0.14163	0.148517	0.145221	0.138073	0.167797	0.164292	0.139675	0.152777	0.146867
4953						667.857	879.886	0.0107054	0.0206673	0.0202112	0.0141518	0.0110392	0.0196271	0.0143579	0.0119168	0.00958263	0.0154158	0.0112462	0.00911	0.0214409	0.0175702	0.0148768	0.0122322	0.0122537	0.0169275	0.0195118	0.0101487	0.0146497	0.0142543	0.0152198	0.0173433	0.0201568	0.00737746	0.0186236	0.0112492	0.0064633	0.0115477	0.0126435	0.0133145	0.00886086	0.014499	0.0191233	0.0148259	0.0124864	0.0184635	0.0135473	0.0103628	0.0155849	0.0137974
174						115.92	879.866	0.942709	6.04702	1.26549	1.07365	0.944048	1.1703	1.19832	1.93614	1.16079	1.2228	1.18176	1.06787	1.54933	1.34114	1.29205	0.994475	1.70393	0.912747	2.28394	1.43075	1.53596	0.977336	2.0211	1.54285	0.906233	0.819514	0.77387	1.22394	1.38838	0.843179	1.3404	1.1008	1.12776	1.24943	1.98073	0.544719	1.19362	1.03055	1.25281	0.83059	1.00483	1.15763
5608						716.841	879.659	0.0274187	0.0462542	0.0405477	0.0245521	0.0446392	0.0467656	0.0310917	0.0389282	0.0457889	0.0379759	0.027383	0.0270571	0.0186111	0.0302986	0.0165708	0.0324864	0.0294052	0.0195017	0.00941289	0.0292488	0.0311969	0.0311366	0.0245298	0.0321222	0.0443172	0.0320286	0.0397073	0.0344597	0.0462961	0.0265701	0.0457185	0.0350855	0.0408511	0.0355472	0.0411757	0.0249733	0.0353445	0.0340801	0.0323391	0.0253923	0.0349348	0.0348305
3458						531.882	879.657	0.0356515	0.038002	0.044711	0.0383194	0.043168	0.0398594	0.0429517	0.0422304	0.0495534	0.0516972	0.0503857	0.0539079	0.0378255	0.0267731	0.0466959	0.0392757	0.0534911	0.0454121	0.0381198	0.0341215	0.0426076	0.0459564	0.0412111	0.0381046	0.0450369	0.0436019	0.0332513	0.0327438	0.0406001	0.0283032	0.0393563	0.0346217	0.0422723	0.0460186	0.0276382	0.0357165	0.0295929	0.0507389	0.0492652	0.0347005	0.0441127	0.0391422
17						100.933	879.648	0.576423	1.9504	0.588477	0.423264	1.5404	0.530171	0.911568	0.911999	0.570062	0.44363	0.614512	0.52483	0.766003	0.611573	0.712995	0.405214	0.519699	0.449769	0.826273	0.430573	0.715392	1.07648	0.501134	0.401758	0.784962	0.579255	0.473172	0.62506	0.539168	0.572862	0.926179	0.384449	0.377646	0.546456	0.360885	1.23492	0.527576	0.671005	0.412441	0.440853	0.47498	0.595562
1203						276.955	879.623	0.0120568	0.0138712	0.0120916	0.0136098	0.0113504	0.014824	0.0119103	0.00368165	0.0161192	0.00572762	0.0192586	0.0182593	0.00906312	0.00677224	0.015316	0.0213471	0.00834153	0.0193188	0.0124558	0.0183253	0.013185	0.0119187	0.00955546	0.0134783	0.0204159	0.0128697	0.0104145	0.0140066	0.0129983	0.00400897	0.0108487	0.0178563	0.0179751	0.00940816	0.0153975	0.00677165	0.01992	0.0106879	0.0138153	0.0141161	0.00784615	0.0127155
3073						504.864	879.613	0.041331	0.0677293	0.0670402	0.0368998	0.0511474	0.0511675	0.0533799	0.0602296	0.0653812	0.0566233	0.0607256	0.0484775	0.049255	0.0458423	0.0493089	0.0493604	0.0483198	0.0516365	0.0528628	0.0488399	0.0527779	0.0525688	0.0484869	0.0499398	0.0613901	0.0570833	0.0599195	0.0440053	0.0685314	0.0590505	0.0441863	0.0445555	0.0464358	0.0542578	0.0519472	0.0566333	0.0454095	0.0534168	0.0440508	0.0461854	0.0633901	0.0525722
4700						648.852	879.61	0.0592524	0.0825482	0.0597572	0.0608557	0.0606745	0.067601	0.0796777	0.0654713	0.0876198	0.0710156	0.0578091	0.0664267	0.065562	0.0692703	0.0661827	0.0805251	0.0740881	0.0650709	0.0637863	0.0676725	0.0685434	0.0656418	0.0694547	0.066026	0.0789931	0.0731796	0.0803264	0.058815	0.0887879	0.0696526	0.062324	0.0616314	0.0696411	0.0705294	0.0791406	0.0573424	0.0627858	0.073896	0.0775631	0.0614857	0.0724952	0.0699856
4685						646.856	879.606	0.202927	0.249838	0.255558	0.222273	0.215361	0.23699	0.232391	0.236982	0.238698	0.231411	0.238327	0.231309	0.219397	0.230426	0.234218	0.216668	0.224338	0.203376	0.241078	0.227438	0.22945	0.227249	0.214033	0.203022	0.230477	0.19796	0.221155	0.209918	0.250683	0.230227	0.221338	0.213101	0.220591	0.226334	0.218379	0.220284	0.218637	0.246092	0.263665	0.204053	0.242043	0.223962
4258						605.887	879.603	0.21858	0.299712	0.24374	0.237471	0.251547	0.262059	0.276546	0.254422	0.278964	0.243402	0.288597	0.257035	0.237016	0.245061	0.261312	0.227947	0.272129	0.236843	0.270234	0.240034	0.255133	0.252939	0.24782	0.250589	0.259198	0.222368	0.234922	0.2212	0.276357	0.237153	0.242844	0.228905	0.247028	0.249599	0.269042	0.227113	0.22295	0.279386	0.266441	0.224264	0.25607	0.245809
1863						360.974	879.601	0.0349923	0.0583555	0.0501885	0.0371846	0.0485891	0.060607	0.0451247	0.0435349	0.0469239	0.0378332	0.0441984	0.0435779	0.0447067	0.0526126	0.0477728	0.0493603	0.0321871	0.0419252	0.0440114	0.0399046	0.0451795	0.0517927	0.0507224	0.0350853	0.0437743	0.0378667	0.0213649	0.0488666	0.0533601	0.044195	0.0367651	0.0360585	0.0560518	0.0460004	0.0528816	0.047653	0.0513844	0.0553347	0.0556137	0.039174	0.0399571	0.0451951
2189						395.908	879.6	0.0460615	0.0636392	0.0760523	0.0570442	0.068758	0.077174	0.0647289	0.0748836	0.0791447	0.0541323	0.0640612	0.0580686	0.0677731	0.0618207	0.0592138	0.0678185	0.0484275	0.0607973	0.057714	0.0561706	0.0631742	0.0645318	0.0571482	0.0569877	0.0690242	0.0501762	0.0608577	0.0523633	0.0627827	0.0635561	0.0668202	0.0429874	0.0662693	0.0618651	0.0547526	0.0614894	0.0573079	0.0593097	0.0770382	0.0480554	0.0561125	0.0594718
2758						463.895	879.598	0.0413766	0.0426062	0.0424841	0.0319081	0.0421756	0.0481412	0.0470885	0.0408417	0.0391651	0.0442789	0.0516782	0.0303831	0.0397455	0.0392423	0.0360127	0.0458203	0.0376171	0.0458194	0.055908	0.045945	0.0424119	0.0514222	0.04891	0.0446368	0.0409096	0.041435	0.0493565	0.0375499	0.0465005	0.039541	0.0403228	0.0405707	0.0547935	0.0236077	0.0347868	0.0329396	0.0326624	0.0355349	0.0319147	0.0303366	0.0328642	0.0395298
2984						492.914	879.589	0.079043	0.0863525	0.107733	0.0835445	0.0956198	0.103136	0.0879103	0.0998609	0.10501	0.0841476	0.110219	0.104275	0.103812	0.100706	0.102542	0.0907102	0.0976747	0.103903	0.089868	0.0936105	0.0964839	0.0971476	0.103201	0.0814528	0.117375	0.0862354	0.0880658	0.0778603	0.0953633	0.0865147	0.0927295	0.0752126	0.0971139	0.0927564	0.0909216	0.0762774	0.0850223	0.0934204	0.093765	0.0862753	0.106892	0.0911801
2490						436.877	879.577	0.0485559	0.0543693	0.056436	0.0452243	0.0551416	0.0476564	0.055846	0.0494843	0.0517512	0.048	0.051831	0.0302656	0.040184	0.0430479	0.0388499	0.0632831	0.0528198	0.0536036	0.0491393	0.0541808	0.0494835	0.0476862	0.0478288	0.036825	0.0486781	0.0467666	0.0563965	0.0538666	0.0490591	0.0327455	0.05865	0.0426549	0.0467301	0.045437	0.0259472	0.0244253	0.0413728	0.056467	0.0478893	0.0451427	0.0369135	0.0445741
1948						368.889	879.55	0.059922	0.0730458	0.0825492	0.0650081	0.0654251	0.0738161	0.0800507	0.0753892	0.0753622	0.0652213	0.0847728	0.0740506	0.0592323	0.0638481	0.0656142	0.0762264	0.0704846	0.0759637	0.0676996	0.0686887	0.0711185	0.062389	0.0702882	0.0652586	0.0810461	0.0761414	0.0758397	0.060534	0.0878505	0.0701743	0.0719259	0.068275	0.066192	0.0647457	0.0805384	0.0672198	0.0772643	0.0794255	0.0847481	0.0615536	0.0686997	0.0720055
3547						537.9	879.159	0.309747	0.409322	0.345298	0.331286	0.357418	0.384278	0.357831	0.355693	0.39886	0.368303	0.396907	0.387021	0.33715	0.351261	0.346082	0.365658	0.369131	0.349191	0.359209	0.353876	0.361676	0.344501	0.353487	0.339173	0.368843	0.318418	0.357961	0.329423	0.400198	0.383595	0.359397	0.347215	0.353894	0.334953	0.351528	0.337395	0.338685	0.391375	0.370591	0.334625	0.354313	0.353478
3964						580.865	879.137	0.0962506	0.122851	0.117473	0.102621	0.0981117	0.13416	0.0967953	0.124557	0.126459	0.113126	0.112254	0.109453	0.111606	0.122921	0.108927	0.120141	0.11201	0.113501	0.112888	0.115398	0.113575	0.120791	0.107111	0.106047	0.123412	0.0952366	0.112874	0.0938149	0.123626	0.125823	0.112482	0.0961253	0.108032	0.108984	0.116082	0.101736	0.109706	0.125058	0.116082	0.0994693	0.112148	0.110732
2406						424.928	879.121	0.124937	0.128745	0.153843	0.170561	0.155121	0.138495	0.137003	0.151376	0.150075	0.141768	0.150953	0.142531	0.100136	0.180852	0.144974	0.145606	0.148131	0.139804	0.149362	0.141261	0.144777	0.134168	0.118032	0.133864	0.142593	0.0756282	0.138096	0.110984	0.168751	0.152883	0.141337	0.130823	0.141389	0.191505	0.139941	0.128505	0.172264	0.0161174	0.169726	0.121558	0.141903	0.133503
1631						327.921	879.116	0.025256	0.0352072	0.034504	0.0345454	0.0358042	0.0380164	0.0195745	0.0370979	0.0346246	0.03045	0.0271424	0.0221329	0.0260869	0.0271601	0.010585	0.0399701	0.0227497	0.0330355	0.0184036	0.0448108	0.0298579	0.0343975	0.0337938	0.018835	0.0360788	0.0290575	0.015176	0.0235416	0.0172858	0.0384764	0.0308938	0.0357612	0.0297309	0.0199038	0.0202009	0.0175626	0.0355681	0.0365075	0.0341088	0.0276214	0.0370028	0.0285752
3759						560.902	879.114	0.0138712	0.0169804	0.00114216	0.0205166	0.0256755	0.0221249	0.0192721	0.0259021	0.0295325	0.0204417	0.0254212	0.0255463	0.0258325	0.0170164	0.0191789	0.0295791	0.0235463	0.0237154	0.0149667	0.0157218	0.0207992	0.0241816	0.0220893	0.0218105	0.0235739	0.0195369	0.0275969	0.0182943	0.0324336	0.022955	0.0238682	0.0195983	0.0268375	0.00154867	0.0269723	0.00122951	0.0124127	0.0153766	0.0333532	0.00751961	0.0216921	0.020144
3900						578.869	879.109	0.318048	0.404435	0.372829	0.358356	0.378821	0.375749	0.372402	0.387956	0.423006	0.385133	0.42408	0.393635	0.361586	0.348366	0.366413	0.352228	0.387621	0.362092	0.381852	0.360244	0.375743	0.386349	0.36768	0.354086	0.382735	0.329321	0.366066	0.323611	0.392368	0.385616	0.365237	0.345396	0.356515	0.347005	0.352527	0.350417	0.365552	0.384422	0.425956	0.353146	0.384012	0.365901
724						191.946	879.053	0.128565	0.149128	0.13662	0.12979	0.150035	0.140703	0.139249	0.138027	0.145856	0.133705	0.147648	0.131585	0.147625	0.129807	0.127907	0.150953	0.1711	0.133755	0.133936	0.141164	0.140358	0.130386	0.138189	0.123502	0.147551	0.132559	0.135493	0.12837	0.164486	0.142023	0.128668	0.131971	0.126968	0.142004	0.131091	0.125837	0.138664	0.156422	0.152947	0.131863	0.150528	0.137976
1370						300.902	879.049	0.0340696	0.0291917	0.0432921	0.0310193	0.0457554	0.0427706	0.0316864	0.044447	0.0380706	0.0390756	0.022846	0.0330447	0.0296029	0.0296993	0.0362081	0.0502262	0.0219985	0.0420747	0.032674	0.0342283	0.0355991	0.0332642	0.0316314	0.0287788	0.0481864	0.0348617	0.0221552	0.0427755	0.028918	0.0184353	0.0277816	0.0409084	0.0346535	0.0145343	0.0359707	0.0321563	0.0367316	0.0370431	0.0425692	0.0274343	0.0448683	0.0331829
2795						469.913	879.01	0.388932	0.521377	0.457173	0.416828	0.43639	0.489204	0.426533	0.486956	0.497305	0.462639	0.482471	0.45258	0.449686	0.447765	0.436167	0.464161	0.48883	0.436173	0.43281	0.431324	0.455265	0.4435	0.439298	0.407606	0.47167	0.385388	0.441817	0.391958	0.454884	0.463834	0.405407	0.416687	0.4206	0.446754	0.423617	0.404729	0.420344	0.503335	0.449282	0.416633	0.495553	0.435145
1149						259.934	879.007	0.0367154	0.0412975	0.0486447	0.0337246	0.0475019	0.0474541	0.0398359	0.0398892	0.054934	0.0388357	0.049198	0.0234705	0.0394555	0.0289993	0.0407274	0.0253938	0.0428817	0.0460526	0.0347938	0.035547	0.0397676	0.0276384	0.0403008	0.0342503	0.0245309	0.0515666	0.0511588	0.0305973	0.0468523	0.025349	0.0418245	0.0347874	0.0320624	0.0413212	0.0432487	0.0391812	0.0260774	0.0371864	0.0353901	0.0215695	0.0438368	0.0364365
3143						510.881	879	0.427235	0.525541	0.469644	0.455499	0.475729	0.496233	0.483787	0.555996	0.51666	0.504513	0.580888	0.481134	0.510671	0.458257	0.44768	0.52467	0.613756	0.471137	0.455026	0.450867	0.495246	0.484057	0.473331	0.430966	0.499754	0.43648	0.474888	0.432646	0.499685	0.487711	0.437524	0.456863	0.534763	0.522327	0.452694	0.430312	0.471428	0.578805	0.527796	0.49989	0.470514	0.480122
3179						512.877	878.615	0.116404	0.165857	0.154755	0.129856	0.135118	0.136393	0.143202	0.140505	0.158601	0.146466	0.151268	0.143024	0.140718	0.137794	0.160558	0.135243	0.141085	0.138434	0.135989	0.135475	0.142337	0.146539	0.132825	0.14558	0.13989	0.118192	0.141736	0.113284	0.151985	0.139034	0.12887	0.140523	0.14083	0.131238	0.128957	0.120221	0.142906	0.14767	0.139264	0.134255	0.154799	0.13693
2233						401.925	878.564	0.466743	0.606047	0.546407	0.483745	0.581867	0.519262	0.512745	0.526452	0.548081	0.553216	0.613189	0.573382	0.602123	0.517993	0.506616	0.516179	0.601416	0.568074	0.569576	0.577409	0.549526	0.500644	0.542342	0.508499	0.573926	0.455009	0.515367	0.436719	0.567213	0.52733	0.483198	0.474804	0.48547	0.53586	0.467347	0.485769	0.478572	0.563156	0.555157	0.482636	0.595569	0.511729
500						164.927	878.523	0.054754	0.0985831	0.0952174	0.0825906	0.0674411	0.0785092	0.0872655	0.0975091	0.105461	0.0464558	0.0911702	0.0928412	0.0897071	0.0831222	0.0976343	0.0949836	0.0813648	0.0966638	0.075693	0.0943107	0.0855639	0.0803561	0.0958651	0.0843564	0.089588	0.075127	0.0829443	0.0846291	0.0988445	0.0835433	0.0837446	0.0812006	0.0870251	0.085196	0.079534	0.0756068	0.0838598	0.0736283	0.0946447	0.0704503	0.0858826	0.0838013
1665						333.938	878.499	0.635151	0.829732	0.724585	0.616037	0.704589	0.641256	0.74113	0.729273	0.729481	0.660134	0.745343	0.649199	0.72804	0.734773	0.787419	0.669659	0.778379	0.649056	0.7409	0.690047	0.709209	0.601927	0.666778	0.727549	0.739827	0.60641	0.646353	0.567415	0.697804	0.720626	0.627229	0.634014	0.622351	0.687725	0.626298	0.661272	0.627327	0.72145	0.814184	0.62129	0.742738	0.668028
4458			Quercetin 3,7,3',4'-tetra-O-sulfate	-10.3176		620.856	878.499	0.0358796	0.0510012	0.0529584	0.0395818	0.0507681	0.0616967	0.0480036	0.0441111	0.0560396	0.0528505	0.0542801	0.0285545	0.0238178	0.0236207	0.0546038	0.0446371	0.0481392	0.0382589	0.0446271	0.0378527	0.0445641	0.023895	0.0532107	0.0373658	0.0508485	0.0426218	0.0499438	0.0462305	0.0443686	0.0104744	0.0579377	0.0500745	0.0492799	0.0581311	0.0300488	0.0421784	0.0486798	0.0654861	0.0602339	0.0520093	0.0374412	0.045523
2530						442.894	878.487	0.457645	0.654116	0.589166	0.498023	0.558356	0.627427	0.527334	0.591202	0.627518	0.524105	0.559923	0.610548	0.541939	0.55486	0.49793	0.642856	0.613168	0.600916	0.595535	0.600991	0.573678	0.497062	0.511644	0.551936	0.584729	0.519807	0.524638	0.44908	0.56594	0.599685	0.56194	0.484978	0.498553	0.484736	0.571044	0.492163	0.514591	0.591815	0.555757	0.47305	0.518259	0.52757
2556						444.89	878.042	0.135285	0.182899	0.169844	0.135903	0.143913	0.149434	0.148574	0.149384	0.174667	0.165138	0.170437	0.191595	0.146695	0.1626	0.145199	0.170295	0.161178	0.147071	0.161436	0.14567	0.157861	0.160715	0.146673	0.144462	0.160543	0.141038	0.157406	0.140037	0.201663	0.147385	0.173624	0.151437	0.147675	0.149457	0.161226	0.13823	0.147349	0.164596	0.182294	0.160043	0.18639	0.158112
1980						374.906	877.996	0.494472	0.785775	0.723764	0.528585	0.660161	0.658712	0.701365	0.621305	0.635766	0.613185	0.741688	0.62587	0.552675	0.666071	0.672199	0.566274	0.669642	0.594604	0.622587	0.617993	0.637635	0.563529	0.673073	0.564453	0.664646	0.515366	0.588187	0.533697	0.60939	0.600803	0.657017	0.535292	0.547647	0.573317	0.670062	0.666526	0.659125	0.655751	0.662577	0.555103	0.592135	0.604385
1165						265.95	877.992	0.462143	0.599733	0.466187	0.431332	0.580285	0.502531	0.46882	0.552181	0.520462	0.460981	0.544737	0.463741	0.541308	0.583233	0.5358	0.472176	0.523501	0.480611	0.515895	0.511576	0.510862	0.482729	0.464401	0.506062	0.553452	0.440186	0.454994	0.412119	0.474505	0.448008	0.514824	0.46555	0.501023	0.485063	0.482204	0.431596	0.479108	0.570824	0.514231	0.54795	0.535468	0.488215
2021						376.903	877.985	0.163122	0.206258	0.183001	0.165647	0.242322	0.233818	0.214271	0.186931	0.20777	0.191393	0.190356	0.181445	0.205377	0.203917	0.194221	0.211439	0.218269	0.18239	0.185143	0.166534	0.196681	0.173322	0.185351	0.218322	0.193826	0.159721	0.175412	0.154796	0.219732	0.213183	0.208035	0.188529	0.172019	0.19789	0.19028	0.161697	0.18921	0.258805	0.200913	0.186453	0.195669	0.192158
274						129.976	877.927	1.56841	1.66606	1.7747	1.56149	1.88219	1.60641	1.90742	1.91911	1.9203	1.67808	1.86282	1.69054	1.75514	1.95568	1.7088	1.69171	2.13527	1.5942	1.60969	1.90326	1.76956	1.69818	1.82159	1.52854	1.60547	1.68446	1.76161	1.55649	2.00542	1.62345	1.96198	1.62367	1.804	1.62707	1.73989	1.67925	1.84761	2.01024	1.95298	1.6794	2.00907	1.76102
1438						308.915	877.521	0.272556	0.367872	0.290989	0.260413	0.274196	0.357504	0.329081	0.285119	0.343787	0.319311	0.325059	0.370009	0.254692	0.270279	0.284437	0.320339	0.413314	0.323087	0.342968	0.272299	0.313865	0.321549	0.326256	0.353342	0.274675	0.288949	0.27961	0.303308	0.318937	0.308257	0.328319	0.262	0.325242	0.297334	0.286385	0.278624	0.277992	0.342369	0.318667	0.259019	0.346821	0.304883
2771						466.889	877.504	0.0386241	0.046912	0.0278617	0.0496039	0.0489672	0.0366986	0.0389224	0.0311981	0.0485336	0.0445089	0.026816	0.0199938	0.0326461	0.0238283	0.0320411	0.0312216	0.0400658	0.0363637	0.0354297	0.0364633	0.036335	0.0336063	0.0370892	0.015045	0.0461008	0.0318003	0.034204	0.0405651	0.0395468	0.0268813	0.0334751	0.0320296	0.0407848	0.0429205	0.0416645	0.0183171	0.0348946	0.0371816	0.034374	0.0367286	0.0151342	0.0336172
755						197.963	877.502	0.34359	0.411368	0.376928	0.330812	0.41306	0.511389	0.379259	0.431354	0.459586	0.498586	0.441392	0.446551	0.42832	0.430272	0.365122	0.417187	0.435665	0.44967	0.438608	0.37261	0.419066	0.331858	0.334418	0.41353	0.426468	0.366962	0.362906	0.321798	0.460475	0.380275	0.373958	0.400206	0.321176	0.356231	0.384088	0.409441	0.373557	0.3868	0.393744	0.335987	0.458052	0.379597
1852						358.935	877.5	0.127024	0.1907	0.146885	0.121856	0.13939	0.112223	0.129101	0.125722	0.0681431	0.132379	0.169352	0.134137	0.127329	0.132347	0.131828	0.114143	0.167974	0.164382	0.152713	0.130129	0.135888	0.12524	0.120685	0.127629	0.149295	0.121421	0.160881	0.119356	0.139665	0.119923	0.123324	0.14875	0.109044	0.118028	0.13404	0.158569	0.144007	0.13614	0.174898	0.135584	0.138967	0.135272
1417						306.918	877.472	0.809637	1.06743	0.903736	0.826738	1.04229	1.13558	0.959295	1.1216	1.03881	0.888524	1.04774	0.994027	0.830849	1.03169	1.00159	1.06007	1.0252	0.822155	1.10972	0.909737	0.981322	0.847493	1.05583	0.930544	0.887345	0.902656	0.906282	0.763971	1.23879	0.917908	1.05352	0.933828	1.0836	0.835042	0.939419	1.09547	0.994057	0.969951	1.09139	0.955151	1.08988	0.974606
3673						552.87	877.445	0.0547174	0.0719162	0.0686502	0.0728713	0.0731845	0.0682365	0.0625004	0.0677832	0.0621416	0.06012	0.0584678	0.0675263	0.0625051	0.0516156	0.074959	0.068725	0.0734957	0.0779503	0.0564605	0.060412	0.0657119	0.0642162	0.0662634	0.0523342	0.0771647	0.0553055	0.0655102	0.0688088	0.0767575	0.0572099	0.0647267	0.0645927	0.0627722	0.0717504	0.0640377	0.0546138	0.0608257	0.0732555	0.0751725	0.0593607	0.0692933	0.0651986
1275						290.948	877.014	0.307482	0.371547	0.296937	0.225184	0.330141	0.266155	0.339786	0.294261	0.24181	0.253506	0.291216	0.314093	0.32842	0.315967	0.227605	0.370751	0.266979	0.330923	0.329322	0.324769	0.301343	0.292692	0.323742	0.322615	0.342301	0.212749	0.303209	0.274682	0.320228	0.22631	0.319666	0.316245	0.275941	0.334358	0.26082	0.273147	0.294596	0.35517	0.310051	0.335364	0.302389	0.299814
1004						238.931	876.971	0.728115	0.852251	0.867734	0.809465	0.815487	0.740909	0.704588	0.900196	0.935044	0.821124	0.890344	0.780048	0.708611	0.787136	0.856205	0.746689	0.834225	0.724087	0.884622	0.709149	0.804801	0.687115	0.773094	0.6335	0.811396	0.653601	0.836963	0.744933	0.681807	0.783856	0.843484	0.657009	0.840099	0.631455	0.739038	0.656723	0.7128	0.88834	1.00533	0.703564	0.91957	0.760184
1050						240.928	876.961	0.19901	0.237268	0.244293	0.213355	0.279292	0.191645	0.26211	0.26744	0.346859	0.260239	0.261666	0.239307	0.263894	0.279759	0.251035	0.287984	0.205278	0.219312	0.272621	0.217194	0.249978	0.242411	0.253255	0.192523	0.229638	0.206609	0.271312	0.186429	0.33096	0.306751	0.275261	0.190824	0.203508	0.252756	0.2192	0.199582	0.258322	0.247289	0.323258	0.23611	0.28979	0.24579
1831						356.94	876.949	0.163123	0.164099	0.184036	0.220217	0.221794	0.221642	0.238587	0.250299	0.228531	0.171765	0.200564	0.208326	0.151785	0.16749	0.2143	0.167594	0.147205	0.169125	0.266142	0.163251	0.195994	0.211871	0.209058	0.150096	0.218065	0.237805	0.231543	0.217193	0.185119	0.180653	0.199399	0.178745	0.232257	0.237193	0.152315	0.245319	0.245279	0.210478	0.212673	0.219843	0.162752	0.206883
1675						334.941	876.86	0.00870076	0.0102447	0.00712655	0.0115643	0.00636702	0.0136469	0.00849991	0.00530526	0.00628323	0.0128326	0.0103991	0.010106	0.0136402	0.0106571	0.00798	0.00630035	0.0106233	0.0116968	0.0113931	0.00334626	0.00933568	0.00684045	0.00994874	0.00733308	0.0158577	0.00605471	0.00711419	0.00702168	0.00986284	0.00765283	0.0113091	0.00699966	0.0131596	0.00426493	0.00668076	0.00576552	0.00687522	0.0205229	0.0129241	0.00838288	0.00626081	0.00904158
750						197.118	876.718	0.00988455	3.92481e-05	0.0126376	0.0119412	0.0143407	0.0127697	0.01329	0.0173971	0.0131664	0.0107755	0.00554202	0.0120238	0.00288691	0.0133002	0.0141256	0.00781264	0.0185337	0.00821763	0.00834594	0.0131267	0.0110079	0.00897812	0.0103788	0.00841858	0.0128229	0.0132008	0.00959549	0.00866185	0.013332	0.0152346	0.0144803	0.0177608	0.00801597	0.0128213	0.0125687	0.00436276	0.0144787	0.0107625	0.014957	0.0129206	0.00876249	0.0116257
4898						663.845	876.503	0.0165336	0.0184108	0.0242929	0.0166985	0.0188995	0.0209986	0.0128156	0.0258302	0.0160733	0.0313033	0.0169578	0.0171116	0.0191491	0.0179254	0.0167825	0.00994588	0.01526	0.0207905	0.0135397	0.0112465	0.0180283	0.0170928	0.0132527	0.0166576	0.0201782	0.0231903	0.0194517	0.0159673	0.0181942	0.0227413	0.0215428	0.0147084	0.0276662	0.0203385	0.021164	0.0180709	0.0240573	0.0242447	0.0218854	0.0168179	0.0230886	0.0200155
2925						484.882	876.467	0.072789	0.0870413	0.0777116	0.0663092	0.0870592	0.0844326	0.0628046	0.0732158	0.0924949	0.0927505	0.0891377	0.0812221	0.0807327	0.0769477	0.0737838	0.0899915	0.0730983	0.0869785	0.0707126	0.082267	0.080074	0.100363	0.0905887	0.0687357	0.0717871	0.0764728	0.0653516	0.0820072	0.075717	0.11065	0.0892631	0.0636486	0.0817785	0.075872	0.0677472	0.0948385	0.0782721	0.103763	0.0813632	0.0622603	0.0727439	0.0806611
1269						288.953	876.444	0.20159	0.164335	0.170293	0.180584	0.274729	0.21511	0.264152	0.235354	0.271897	0.217739	0.227296	0.185631	0.226824	0.15002	0.21441	0.166691	0.232533	0.19059	0.202119	0.216009	0.210395	0.211084	0.200934	0.260947	0.158915	0.200642	0.202008	0.191274	0.319709	0.218966	0.208606	0.230502	0.216419	0.21967	0.17196	0.24671	0.208929	0.218866	0.246373	0.19607	0.247256	0.218792
2018						375.91	876.418	0.013119	0.0208195	0.013063	0.0129673	0.0164566	0.00710502	0.0049373	0.0161888	0.0147319	0.0120383	0.0114665	0.0155031	0.00377711	0.0117166	0.0107419	0.011983	0.0122901	0.00818802	0.0116285	0.0173604	0.0123041	0.0128312	0.0131498	0.00788946	0.0102685	0.0124234	0.00680013	0.0149482	0.0149539	0.00652667	0.014709	0.0114199	0.0137702	0.0109525	0.00670665	0.00382286	0.00994979	0.0192075	0.0133551	0.0114473	0.0124386	0.0113785
3166						511.901	876.397	0.0279121	0.0344104	0.0370055	0.0202339	0.0342134	0.0312485	0.0189943	0.0255455	0.0295405	0.0269923	0.0311161	0.032154	0.0380359	0.0144266	0.0241077	0.0283421	0.0373435	0.0302954	0.0315831	0.0286677	0.0291084	0.0291099	0.0263062	0.0242369	0.0131541	0.0232195	0.0337957	0.0332541	0.01506	0.0223129	0.0320212	0.0163453	0.0205652	0.0270641	0.0273063	0.0191863	0.0189246	0.0254932	0.0327989	0.0261547	0.0189182	0.0242614
[truncated: 7,185 more rows]
[truncated: 6 more columns]
