# Supplementary material for: A comparative lipidomic study of the human placenta from women with or without gestational diabetes mellitus
Source: Royal Society of Chemistry journal article supplement (doi:10.1039/d2mo00083k), 2022-04-23
Supplement: d2mo00083k4.xlsx [file d2mo00083k4.xlsx]

## Sheet: Sheet1
Header	Description
id	The unique data number of the substance in this qualitative analysis
MS2 name	The substance name obtained by qualitative matching analysis of secondary mass spectrometry
MS2 score	The score of the second-level match is [0, 1], the larger the better
MS1 name	For the name of first-level fragment ion matching, refer to HMDB database
MS1 ppm	The accuracy of the first level match, the value is (-25, 25), as close to 0 as possible
mzmed	Material characteristics Mass charge ratio of ions
rtmed	Chromatographic retention time of the substance
MEAN OO	The mean of the relative quantitative value of the substance in GDM groups within the group comparison
MEAN XX	The mean of the relative quantitative value of the substance in NC group within the group comparison
VIP	The substance in the group was compared to the oPLS-DA model obtained by the variable projection significance
P-VALUE	The p-value obtained by the t-test of this substance in the group comparison, p-value = probability of hypothesis being correct but rejected = number of negative results/total number of results, is a test probability against the sample data
Q-VALUE	The hypothesis test statistic (p-value) is the result after the correction of multiple hypothesis test. Q value = the probability of being rejected but correct = the number of false positive results/the number of presumed positive results. It is a test probability of the inference obtained from statistical test and the re-statistics of p-value
FOLD CHANGE	The substance in this group was compared with the multiple relationship between the two groups of experiments
LOG_FOLDCHANGE	FOLD CHANGE takes the logarithm base 2
id	MS2 name	MS2 score	MS1 name	MS1 ppm	InChIKey	mzmed	rtmed	MEAN GDM	MEAN NC	VIP	P-VALUE	Q-VALUE	FOLD CHANGE	LOG_FOLDCHANGE
1234	FA(18:1)	1			UWHZIFQPPBDJPM-FPLPWBNLSA-N	281.249	183.88	4.16207	3.00335	2.13068	0.012006	0.19598	1.38581	0.470732
1654	FA(22:4)	1			IGFLWIHPPADNDL-GFRMADBLSA-N	331.264	175.217	3.35526	2.49849	1.37376	0.0281762	0.250809	1.34292	0.425371
9185	SHexCer(d48:0)	0.999978			DKBFKQBWLXMTPR-UHFFFAOYSA-N	976.738	580.723	0.592841	0.428829	2.2818	0.0110763	0.192857	1.38246	0.467242
9539	SHexCer(d51:1)	0.999854			ZIDBSUHHCCOGTD-FCQUAONHSA-N	1016.8	643.615	1.08137	0.795534	2.29211	0.0232763	0.23721	1.35931	0.44287
9723	SHexCer(d53:3)	0.999854			NTPVMGIGYWLPCK-GXKYABPLSA-N	1040.8	635.714	0.295292	0.216595	2.30943	0.041429	0.276286	1.36333	0.44714
9668	SHexCer(d52:0)	0.999854			ARKZQBXBYFURCA-UHFFFAOYSA-N	1032.8	629.105	1.11271	0.754804	2.36041	0.00742407	0.176869	1.47416	0.559897
9527	SHexCer(d51:2)	0.999854			IRYFFUIKJWCXLZ-XUQDTYRNSA-N	1014.79	621.777	0.912616	0.697691	2.27173	0.0301148	0.255284	1.30805	0.387421
9655	SHexCer(d52:1)	0.999854			KLFNEWJDKKAIHU-VHXPQNKSSA-N	1030.78	608.125	0.73852	0.515297	2.37074	0.0104937	0.190678	1.43319	0.519233
9272	SHexCer(d49:2)	0.999854			AMQIXOWXDYAEBF-USGWXJRWSA-N	986.759	597.853	0.783291	0.638743	2.0705	0.0447925	0.284083	1.2263	0.294312
9424	SHexCer(d50:1)	0.999854			CJNKGJHMQDDCMY-DQRAZIAOSA-N	1002.75	581.742	0.515737	0.366306	2.49476	0.00455689	0.16295	1.40794	0.493585
6063	PE(18:3e/20:4)	0.953798			QIQGIECOBDSDSX-IVGDTRDPSA-N	746.513	423.251	35.5095	43.0706	1.06024	0.0284024	0.251354	0.824448	-0.2785
4206	FAHFA(17:0/22:4)	0.948323			VYEULUWHKSOHAK-WDZSBUSASA-N	599.501	454.775	6.67229	5.53074	2.72371	0.00219811	0.149116	1.2064	0.270709
1767	FAHFA(3:0/18:3)	0.948323			SEQCMHGNTIRIDD-ORKBZCNQSA-N	349.238	130.852	0.181753	0.134967	1.68379	0.0270535	0.248006	1.34665	0.429379
7607	PC(18:2/20:3)	0.923632			LSNIXSHXTMSKGF-JPMBMWHXSA-N	852.573	404.585	5.16421	6.35986	1.3538	0.0402448	0.273432	0.812	-0.300448
7143	SQDG(17:0/17:0)	0.890012			DHZFKBZXEZKTHX-UHFFFAOYSA-N	821.516	344.718	0.00545573	0.0103033	1.53785	0.0266619	0.246988	0.529514	-0.917258
7343	PE(18:1e/26:4)	0.885209			QEUKOPROVURKOQ-GAXXYEEVSA-N	834.636	592.702	0.0463453	0.0697699	1.62482	0.00595353	0.170911	0.664259	-0.590182
7737	PI(16:0/20:2)	0.877259			UJENRFPZRNBKKL-BCTRXSSUSA-N	861.539	321.448	0.590051	0.814553	1.7671	0.0233962	0.237589	0.724387	-0.465168
7404	PC(18:1e/20:4)	0.870843			YPEVVVCDYBKGNI-BXHZXWGDSA-N	838.547	477.604	0.211595	0.308704	1.22016	0.0297925	0.25457	0.685431	-0.544917
8171	PI(19:1/19:1)	0.868607			YYTBTIYYOOGFDQ-WRBBJXAJSA-N	889.573	369.142	0.878817	1.2276	1.85249	0.0159045	0.207276	0.715881	-0.482209
8597	PC(22:6/22:6)	0.866398			XLKQWAMTMYIQMG-MYZZJVRYSA-N	922.558	339.091	0.107924	0.183999	1.01691	0.024594	0.24124	0.586547	-0.769682
6922	PE(16:1e/26:4)	0.862745			WPPIYRZFHWHJSP-GKPKDRHFSA-N	806.606	559.845	0.579577	0.71655	1.53316	0.037073	0.268346	0.808844	-0.306067
8014	PC(20:3/20:3)	0.860906			SUSAZHLUBGMSDJ-RSLAUBRISA-N	878.572	447.783	1.25331	1.99919	1.08741	0.0332024	0.261593	0.62691	-0.67367
8145	PI(18:0/20:3)	0.857618			GGSSNEAFVQRIHU-JTBMWNAQSA-N	887.563	383.209	0.640545	0.906176	1.87224	0.0055669	0.16893	0.706866	-0.500492
6309	PE(16:0/22:6)	0.85451			MPWUZHVZZKSTPV-LGFBOSHVSA-N	762.507	399.571	11.872	15.3908	1.23976	0.0168052	0.211783	0.771374	-0.374498
7319	PI(17:1/17:1)	0.852833			NBJSYDLFENEDRE-IQRFGFHNSA-N	833.515	326.031	0.194285	0.255292	1.1736	0.0402703	0.273473	0.761029	-0.393978
8391	OxPI(16:0/20:4+3O)	0.817027			ONIDDGZTAMHXSO-KVBJYXNOSA-N	905.517	260.467	0.24069	0.414774	1.69003	0.0427783	0.279508	0.580292	-0.785148
5387	Cer/BS(d23:3/22:1)	0.789941			QTLQRQOOMYMPFP-KTCMQQNJSA-N	700.6	509.109	0.060861	0.046341	1.37496	0.0358506	0.266335	1.31333	0.393228
7671	PI(10:0/26:4)	0.749283			XBRXODRRBPUJTR-XWVIRPHISA-N	857.516	275.9	0.110148	0.240349	1.90074	0.0409023	0.274991	0.458285	-1.12568
7613	HexCer/NS(d18:1/24:2)	0.747937			BZGJJXJQWYTKIY-UZRIYOBRSA-N	852.654	500.249	0.28797	0.247935	1.48797	0.026926	0.247677	1.16147	0.215953
6079	SM(d16:0/18:1)	0.721477			WDAUKOGYPMQBKW-VLGSPTGOSA-N	747.516	423.474	17.6495	21.0491	1.12014	0.0296067	0.254153	0.838491	-0.254132
8334	PC(20:3/22:5)	0.711666			JCZOXJJXTZMLHT-KBNKHNLLSA-N	902.514	459.005	0.623825	0.55157	1.0537	0.0483624	0.291565	1.131	0.177599
7263	PC(18:1/18:1)	0.709846			SNKAWJBJQDLSFF-YEUCEMRASA-N	830.582	439.388	5.33309	6.57993	1.03102	0.011415	0.194042	0.810509	-0.303101
5218	Cer/NS(d18:2/24:2)	0.660428			QMPJMPWWIPZEKC-AREXDUQASA-N	688.587	514.346	4.35405	3.68526	1.4656	0.039071	0.271479	1.18148	0.24059
5659	PE(16:1e/20:5)	0.652367			YMKZESHNWGNAIE-VNTVABMMSA-N	720.496	403.657	0.511217	0.685923	1.70172	0.0108276	0.19195	0.745298	-0.42411
6929	PI(16:0/16:1)	0.643396			QAWXBJDYTIBLRK-PEZBUJJGSA-N	807.491	436.313	0.588744	0.529846	1.51154	0.0460227	0.286748	1.11116	0.152068
7870	PC(20:5/20:5)	0.610921			WAIHGVAZVKEQGR-IYICPNJGSA-N	870.546	451.494	0.56433	0.495316	1.79327	0.0373228	0.268749	1.13933	0.18819
6099	PE(16:0e/22:6)	0.610829			JJMPYAHUHHQAJB-YKPVOZFUSA-N	748.519	423.159	5.31624	6.44149	1.13254	0.020412	0.227266	0.825313	-0.276988
4284	Cer/NS(d18:2/18:0)	0.575637			WNPWDGNHTKGEDS-LLRUVXLESA-N	608.525	463.979	1.12976	0.937362	1.8581	0.0499254	0.294613	1.20525	0.269333
3487	PE(2:0/19:1)	0.548325			NEAUWFWSASVTBS-QXMHVHEDSA-N	534.319	107.535	0.170105	0.262514	1.39962	0.000303988	0.132616	0.647985	-0.625968
6914	PS(16:0/22:6)	0.546716			PWBBJQOVCTWPIM-LGFBOSHVSA-N	806.496	320.531	0.549277	0.702404	1.29395	0.0191433	0.222249	0.781997	-0.354765
5079	Cer/NDS(d19:0/22:2)	0.540777			MRTXQLDINLJEQF-CCLKJPSRSA-N	678.558	514.326	0.521256	0.433325	2.00892	0.0149202	0.203859	1.20292	0.266543
7302	PS(18:1/22:6)	0.536979			FZVOBDJBRIEKPS-HILQMKNTSA-N	832.512	324.836	0.251716	0.353539	1.07953	0.0403403	0.273587	0.71199	-0.490071
9086	HexCer/AP(t23:0/28:2)	0.528004			OXMDEDOGACQRDW-GKKPSEFHSA-N	966.779	625.664	0.0409319	0.0288777	2.09607	0.0353579	0.265494	1.41742	0.50327
9085	HexCer/AP(t15:0/36:2)	0.513664			ALSMLQXAPIEOOL-VYEFPUSRSA-N	966.791	645.075	0.346789	0.238642	2.47722	0.00667924	0.174128	1.45318	0.539212
9064	HexCer/AP(t15:1/36:2)	0.513664			DBYWUNKLYKSYAM-MGMUWRIPSA-N	964.771	625.326	0.223444	0.168634	2.2802	0.0308572	0.256887	1.32502	0.406013
8782	HexCer/AP(t15:0/34:2)	0.513664			VPBZMZYWTXVGPC-VYEFPUSRSA-N	938.759	621.918	0.401721	0.29808	2.21125	0.0276837	0.249599	1.34769	0.430492
1235						281.239	140.423	0.0896476	0.0607798	1.74946	0.0223317	0.234122	1.47496	0.560673
1387						303.232	130.306	82.7445	63.1933	1.61782	0.0320307	0.259307	1.30939	0.388892
1402						305.239	130.191	1.98246	1.51944	1.59417	0.0347509	0.264433	1.30473	0.383753
9436						1004.77	605.404	1.97641	1.52062	2.108	0.0344814	0.263953	1.29974	0.378219
9541						1016.8	622.123	0.22985	0.167755	2.4963	0.00902688	0.184248	1.37015	0.454332
7237						828.573	439.012	40.4904	49.3294	1.34672	0.00798989	0.178655	0.820818	-0.284867
8486						913.581	382.181	0.646827	0.836522	1.66597	0.0298323	0.254659	0.773234	-0.371022
7824						867.539	315.291	0.107482	0.156908	1.37052	0.0403126	0.273542	0.684997	-0.54583
9347						993.651	549.131	2.86767	2.51189	1.74144	0.0478186	0.290473	1.14164	0.191104
8419						907.535	296.637	0.113761	0.158077	1.44754	0.0451458	0.284858	0.719652	-0.474629
8415						907.535	283.695	0.194405	0.34945	1.78871	0.0143322	0.20247	0.556315	-0.846025
7922						873.55	345.511	0.0959971	0.136454	1.62107	0.00489114	0.165152	0.703513	-0.507351
7704						859.532	337.117	0.302754	0.403006	1.54042	0.0118262	0.195407	0.751238	-0.412659
7696						859.532	321.449	4.57295	6.42384	1.90514	0.0251569	0.242871	0.711872	-0.490311
5814						728.624	557.121	0.102649	0.0800655	2.13359	0.0311801	0.257566	1.28206	0.358462
5816						728.629	545.284	0.657768	0.537615	1.7155	0.00402229	0.158831	1.22349	0.291005
5295						694.591	562.532	0.050389	0.0353382	1.7399	0.012685	0.198025	1.42591	0.511882
7888						871.566	489.51	0.029504	0.0395124	1.46864	0.0301546	0.255371	0.746703	-0.421393
8619						923.655	480.81	0.147283	0.0702309	2.65368	0.00018953	0.129792	2.09713	1.06842
7321						833.504	441.964	0.21711	0.188293	1.14958	0.0387186	0.270923	1.15304	0.205446
5267						692.619	574.169	42.2629	30.9426	1.56284	0.0200011	0.225687	1.36585	0.449795
4965						668.574	563.306	0.643225	0.491361	2.08072	0.00990258	0.188265	1.30907	0.38854
8604						922.577	445.073	0.897492	1.09151	1.36342	0.0183314	0.218807	0.822247	-0.282355
7272						830.602	548.605	0.0626335	0.0858476	1.48656	0.0116187	0.194728	0.72959	-0.454842
3986						582.528	479.709	8.83165	8.47795	1.74447	0.015218	0.204528	1.04172	0.0589666
7373						836.542	404.966	0.802544	0.516213	1.02212	0.0122925	0.196865	1.55468	0.636613
6889						804.581	544.683	0.664807	0.500347	2.39971	0.0102996	0.18991	1.32869	0.410005
7949						874.593	542.558	0.452912	0.640835	1.52547	0.000727313	0.136854	0.706753	-0.500722
623						175.959	975.892	0.091214	0.065062	1.41771	0.0029845	0.151536	1.40195	0.487439
1399						304.914	974.505	0.0553192	0.0391522	1.36088	0.00531181	0.167598	1.41293	0.498686
594						171.957	970.475	0.0431919	0.0345908	1.62773	0.0332522	0.261687	1.24866	0.320375
1397						304.914	956.134	0.0479338	0.0364097	1.03882	0.033749	0.262618	1.31651	0.39672
1400						304.914	899.09	0.0240299	0.019811	1.28145	0.0427612	0.279468	1.21296	0.278528
8259			PS(22:1(11Z)/22:2(13Z,16Z))	-3.65523		896.635	888.553	0.00697498	0.0116845	1.02402	0.0476932	0.290219	0.596943	-0.744336
8677						928.835	881.801	0.122121	0.115423	1.51967	0.0385529	0.270672	1.05803	0.081375
615						174.956	881.765	6.26861	5.78146	1.64025	0.0123411	0.197012	1.08426	0.116712
1754						346.958	881.264	0.0432321	0.0360746	1.17212	0.0292759	0.253401	1.19841	0.261118
656						181.976	881.264	0.137028	0.129597	1.28308	0.028304	0.251118	1.05733	0.0804291
2233						401.925	878.564	0.549526	0.511729	2.19641	0.00852379	0.181662	1.07386	0.102807
1665						333.938	878.499	0.709209	0.668028	1.74533	0.0338743	0.26285	1.06165	0.0863018
2530						442.894	878.487	0.573678	0.52757	1.86123	0.00452753	0.162744	1.0874	0.120877
755						197.963	877.502	0.419066	0.379597	1.69754	0.00719999	0.176095	1.10398	0.142712
3166						511.901	876.397	0.0291084	0.0242614	1.54201	0.0179015	0.216905	1.19978	0.262775
4622						638.824	876.155	0.00713495	0.00557096	1.1338	0.0409591	0.275132	1.28074	0.356978
3818						568.84	875.356	0.0411178	0.036999	1.73949	0.0288618	0.252442	1.11132	0.152277
3347						521.391	822.986	0.0696277	0.0955252	1.25335	0.0220339	0.233111	0.728894	-0.456219
2013						375.293	805.659	1.62655	1.2553	1.95423	0.00100008	0.139022	1.29574	0.373778
9832						1056.9	755.203	0.017389	0.0156353	1.16755	0.0342335	0.263506	1.11217	0.153374
9017			TG(19:0/20:0/20:0)[iso3]	-20.0079		959.882	737.997	0.00493087	0.00284355	1.3512	0.0305072	0.256138	1.73405	0.794147
1929						366.166	733.972	0.0259632	0.0187063	1.73476	0.00500745	0.165862	1.38794	0.472943
1278						290.949	733.742	0.236141	0.208123	1.40465	0.0283411	0.251207	1.13462	0.182212
3009			PG(P-18:0/0:0)	17.288		495.318	733.605	0.0476095	0.0403706	1.86838	0.0100676	0.188961	1.17931	0.237944
2773						466.889	733.375	0.0924054	0.0771855	1.67894	0.0119535	0.195814	1.19719	0.259648
8988						956.863	724.929	0.0257188	0.0161876	2.13442	0.00477513	0.164416	1.58879	0.66793
8998			TG(19:0/20:0/20:1(11Z))[iso6]	-19.981		957.866	724.375	0.00754385	0.00330852	1.1416	0.0358919	0.266405	2.28013	1.18911
2726						458.869	714.081	0.0666174	0.0564324	1.23218	0.0121105	0.196307	1.18048	0.239376
3006			PG(P-18:0/0:0)	17.2888		495.318	713.933	0.0644972	0.0503364	1.51332	0.0102889	0.189867	1.28132	0.357634
2297						411.17	713.866	0.197824	0.166627	1.13557	0.0202812	0.226768	1.18723	0.247598
1590						323.22	713.755	0.0467501	0.0359691	1.80601	0.0122117	0.196619	1.29973	0.378211
3771						562.898	713.632	0.183823	0.142228	1.21053	0.0244624	0.240851	1.29245	0.370107
3404						526.312	713.555	0.0185326	0.0152515	1.27849	0.0426629	0.279238	1.21513	0.281113
9390						996.837	685.999	0.00734046	0.00165636	2.18237	0.00282143	0.15114	4.43168	2.14785
9598						1022.85	685.984	0.00965199	0.00529238	2.20289	0.0267139	0.247125	1.82375	0.866909
9931						1073.87	676.991	0.00760729	0.00352868	1.80812	0.0377678	0.269455	2.15585	1.10825
9718			TG(22:3(10Z,13Z,16Z)/22:3(10Z,13Z,16Z)/22:3(10Z,13Z,16Z))	-19.7222		1039.85	671.98	0.006928	0.00273238	1.49195	0.00560087	0.1691	2.53552	1.34228
9714						1038.85	671.763	0.0132669	0.00677869	2.26191	0.00166317	0.146265	1.95714	0.968748
10020						1088.86	668.048	0.00636831	0.00246511	2.13272	0.0126051	0.197794	2.58338	1.36926
9581						1020.84	667.833	0.0179805	0.0107322	2.33262	0.0242224	0.240134	1.67538	0.744491
5940			PA(17:0/22:4(7Z,10Z,13Z,16Z))	5.31956		737.517	667.226	0.0333692	0.0280846	1.02467	0.0397421	0.272606	1.18817	0.248736
9389						996.826	666.478	0.0160726	0.00851342	2.53369	0.00407177	0.159248	1.88792	0.916797
9378			TG(19:0/22:5(7Z,10Z,13Z,16Z,19Z)/22:5(7Z,10Z,13Z,16Z,19Z))[iso3]	17.2054		995.824	666.461	0.0508308	0.0339771	2.32431	0.0125045	0.197499	1.49603	0.581138
9365						994.819	666.389	0.082186	0.0552633	2.40985	0.0122892	0.196855	1.48717	0.572572
9884						1063.81	666.287	0.0103048	0.00541271	2.35756	0.0113729	0.193898	1.90382	0.928893
9139						970.81	665.759	0.00900729	0.00262313	2.52678	0.00267946	0.150757	3.4338	1.7798
9113						968.805	665.458	0.0611218	0.0280093	2.78627	0.000824755	0.137291	2.18219	1.12578
9124			TG(17:2(9Z,12Z)/22:3(10Z,13Z,16Z)/22:4(7Z,10Z,13Z,16Z))[iso6]	15.6966		969.807	665.422	0.0356958	0.0156546	2.58499	0.0016795	0.146376	2.28021	1.18917
9875						1062.81	665.374	0.0192475	0.010507	2.67161	0.00230001	0.149517	1.83187	0.87332
10232						1132.86	665.136	0.00709148	0.00239034	2.49581	0.000781517	0.13711	2.96673	1.56887
9482						1010.67	661.075	0.0100767	0.0185352	1.08459	0.00707134	0.175633	0.543654	-0.87924
10407						1180.81	659.899	0.00984166	0.00424948	2.4712	0.00995782	0.1885	2.31597	1.21161
10133						1113.82	659.413	0.0238653	0.0118982	2.46275	0.00439734	0.161805	2.00579	1.00417
9742						1044.84	659.259	0.196176	0.115559	2.5341	0.019684	0.224439	1.69763	0.76352
10130						1112.82	659.192	0.0364839	0.0201788	2.40202	0.00595318	0.170909	1.80803	0.854415
9750						1045.84	659.103	0.110041	0.0634309	2.51223	0.00114449	0.141235	1.73481	0.794781
9214						980.804	654.775	0.00831548	0.0045235	2.01152	0.03825	0.270207	1.83829	0.87836
9707			TG(22:3(10Z,13Z,16Z)/22:3(10Z,13Z,16Z)/22:4(7Z,10Z,13Z,16Z))[iso3]	-20.1888		1037.83	654.748	0.0240405	0.0148017	2.107	0.0245034	0.240972	1.62417	0.699704
10042						1092.69	653.232	0.101746	0.131011	1.54107	0.0232177	0.237023	0.77662	-0.364719
10330						1159.67	652.743	0.0918824	0.121032	1.51866	0.0135405	0.200444	0.759158	-0.397527
8985						956.715	652.297	0.459448	0.561305	1.33325	0.0399658	0.272975	0.818534	-0.288885
9504						1012.82	651.922	0.0328793	0.0195228	2.68312	0.00441545	0.161938	1.68414	0.752016
9496			TG(20:3(8Z,11Z,14Z)/22:3(10Z,13Z,16Z)/22:3(10Z,13Z,16Z))[iso3]	-20.8506		1011.82	651.803	0.106434	0.0681631	2.57027	0.00419425	0.160247	1.56146	0.642892
9962						1078.8	651.774	0.0422474	0.0244623	2.67119	0.0018699	0.147546	1.72704	0.788304
9970						1079.8	651.765	0.026517	0.0153191	2.55082	0.00419481	0.160252	1.73098	0.791588
147						112.316	651.666	0.0036951	0.00146749	2.17289	0.00312156	0.151838	2.51797	1.33226
10289						1147.79	651.66	0.00798555	0.00285852	2.55666	0.00143808	0.144488	2.7936	1.48212
9485						1010.82	651.631	0.152689	0.0976994	2.70879	0.00250885	0.150244	1.56284	0.644172
10284						1146.79	651.619	0.0140578	0.00742895	2.41858	0.00433015	0.161302	1.8923	0.920141
9367						994.811	647.984	0.0176272	0.010591	2.24069	0.0152546	0.204609	1.66436	0.734969
9343						992.806	647.876	0.0931591	0.0661442	2.36116	0.0306317	0.256406	1.40842	0.494082
9349			TG(19:0/22:5(7Z,10Z,13Z,16Z,19Z)/22:6(4Z,7Z,10Z,13Z,16Z,19Z))[iso6]	16.8684		993.808	647.788	0.0587253	0.0401731	2.45962	0.0216112	0.231645	1.46181	0.547754
9698						1036.82	645.576	0.0224973	0.0136555	1.38213	0.0296055	0.25415	1.64749	0.720271
9125			TG(17:2(9Z,12Z)/22:3(10Z,13Z,16Z)/22:4(7Z,10Z,13Z,16Z))[iso6]	7.82191		969.799	645.322	0.0141675	0.00755789	1.93375	0.00447844	0.162395	1.87453	0.906525
9112						968.797	645.321	0.0767431	0.0505964	2.521	0.00549079	0.168544	1.51677	0.601002
109						107.536	645.173	0.00709949	0.0035247	2.5161	0.00251605	0.150267	2.01421	1.01021
9096			TG(17:2(9Z,12Z)/22:3(10Z,13Z,16Z)/22:5(7Z,10Z,13Z,16Z,19Z))[iso6]	14.9614		967.791	645.075	0.226307	0.153359	2.50982	0.0055722	0.168957	1.47567	0.56137
106						107.424	645.066	0.0133262	0.00757551	2.06357	0.00200011	0.148226	1.75911	0.814846
10361						1170.75	644.745	0.0170363	0.0106015	2.01907	0.00659821	0.173799	1.60697	0.684347
9570			TG(21:0/22:6(4Z,7Z,10Z,13Z,16Z,19Z)/22:6(4Z,7Z,10Z,13Z,16Z,19Z))[iso3]	9.30198		1019.82	644.434	0.0773653	0.0569727	2.14097	0.0412101	0.27575	1.35794	0.441416
10014						1087.8	644.122	0.0134832	0.00783095	1.39952	0.0194159	0.223363	1.72178	0.783899
10006						1086.8	644.025	0.0785247	0.0551282	2.37214	0.0184784	0.219445	1.4244	0.510355
10856			M(IP)2C(t18:0/26:0(2OH))	-13.1602		1356.74	643.702	0.0107972	0.00613378	1.66528	0.0140734	0.201828	1.76028	0.815805
10720						1288.75	643.693	0.0261983	0.0163192	2.3136	0.00925906	0.18537	1.60537	0.682907
153						113.205	643.656	0.00463737	0.00222391	2.12017	0.00302732	0.151633	2.08524	1.06021
8805						940.773	643.645	0.102534	0.0541535	2.72485	0.000694297	0.136679	1.89341	0.920983
9561						1018.81	643.645	0.284564	0.199257	2.33562	0.0100853	0.189034	1.42812	0.514118
9946						1076.75	643.639	0.0115762	0.0049238	2.39005	0.000722288	0.136828	2.35107	1.23332
10523						1221.77	643.631	0.0400896	0.0261412	2.19534	0.019181	0.222404	1.53357	0.616898
9738			DAT(19:0/25:0(2Me[S],3OH[S],4Me[S],6Me[S]))	22.465		1043.82	643.625	0.155192	0.107242	2.45834	0.00895858	0.18391	1.44712	0.533181
9555						1017.81	643.604	0.700173	0.504285	2.26101	0.0175534	0.215322	1.38845	0.473472
10001						1085.79	643.587	0.206472	0.151324	2.35728	0.0223595	0.234215	1.36444	0.448308
10310						1153.78	643.587	0.0883252	0.0599012	2.46238	0.0107681	0.191728	1.47451	0.56024
151						113.093	643.584	0.0257851	0.0156016	2.09384	0.0226641	0.235229	1.65272	0.724842
9992						1084.79	643.584	0.311079	0.227488	2.35008	0.0202712	0.22673	1.36745	0.451487
10726						1289.76	643.583	0.0172544	0.00980209	2.01508	0.00944682	0.186246	1.76027	0.815801
10305						1152.78	643.569	0.124182	0.0880539	2.3336	0.0170743	0.213078	1.4103	0.495997
10126						1111.81	643.568	0.0313739	0.02041	2.10486	0.0242349	0.240172	1.53718	0.620289
10526						1222.77	643.551	0.0096423	0.00574332	1.5595	0.0294959	0.253902	1.67887	0.747491
10519						1220.77	643.546	0.0620823	0.0422235	2.257	0.0187237	0.220494	1.47033	0.556137
9745						1044.83	643.501	0.053441	0.0346019	2.38522	0.0123903	0.19716	1.54445	0.627096
10314						1154.78	643.493	0.0268416	0.0181896	2.14931	0.0312545	0.257721	1.47566	0.561356
9941						1075.77	643.411	0.00957089	0.00539093	2.01759	0.0153908	0.204906	1.77537	0.828119
10124			MIPC(d20:0/26:0)	22.4904		1110.81	643.324	0.0576412	0.0381811	2.31016	0.0179057	0.216924	1.50968	0.594242
10397						1178.79	643.225	0.0146507	0.00794043	1.72569	0.0126643	0.197965	1.84508	0.883686
9388						996.801	639.876	0.00986599	0.00532459	2.103	0.0334051	0.261976	1.85291	0.889793
10565						1238.77	638.812	0.010568	0.00635359	1.36175	0.0426019	0.279094	1.66331	0.734057
10203						1127.81	637.534	0.00714699	0.00282951	2.27309	0.00192544	0.147847	2.52588	1.33679
10386						1176.78	636.033	0.0245593	0.0166596	2.17102	0.024624	0.241328	1.47418	0.559913
10392						1177.78	635.954	0.014776	0.00930462	2.31297	0.0422238	0.2782	1.58803	0.667238
10122						1109.8	635.734	0.0459144	0.0308851	2.29094	0.0196795	0.224421	1.48662	0.572033
9463						1008.8	634.349	0.464918	0.323493	2.36644	0.0123083	0.196913	1.43718	0.523242
9947						1076.79	633.741	0.135407	0.0925308	2.44226	0.00934744	0.185785	1.46337	0.549294
10505						1212.76	633.599	0.021646	0.0126029	2.29195	0.0113126	0.193689	1.71755	0.780352
10693						1280.75	633.595	0.00762197	0.00383512	1.73365	0.0249303	0.24222	1.98742	0.990895
10269						1144.77	633.583	0.0527964	0.0347602	2.4832	0.0113674	0.193878	1.51888	0.603004
9952						1077.79	633.555	0.0901915	0.0624462	2.40313	0.0130751	0.19916	1.44431	0.530378
9484						1010.8	633.533	0.111715	0.0797305	2.30014	0.0148283	0.203648	1.40115	0.486613
9472			TG(20:4(5Z,8Z,11Z,14Z)/22:3(10Z,13Z,16Z)/22:3(10Z,13Z,16Z))[iso3]	-18.5258		1009.8	633.497	0.311688	0.221158	2.3615	0.0147431	0.20345	1.40935	0.495028
10276						1145.78	633.361	0.0354651	0.022482	2.53461	0.0079051	0.178401	1.57749	0.657633
9605						1023.78	633.289	0.0106323	0.00518799	1.96996	0.0367466	0.26782	2.0494	1.0352
10036						1091.76	630.691	0.0158026	0.00772568	2.12749	0.000281214	0.13223	2.04546	1.03243
10283						1146.66	630.063	0.0214479	0.0336641	1.00077	0.0282751	0.251048	0.637115	-0.650375
10327						1158.75	629.7	0.0111274	0.00560718	2.4934	0.000703805	0.136731	1.9845	0.988775
9793						1052.78	629.564	0.0184291	0.0113005	2.21828	0.00573945	0.169834	1.63082	0.7056
9251						984.791	629.537	0.0739639	0.0506778	2.44332	0.0054543	0.168355	1.45949	0.545466
10357						1169.78	629.489	0.0832941	0.0529434	2.4947	0.00176605	0.146937	1.57327	0.653765
9778						1050.77	629.471	0.0989755	0.0650443	2.61874	0.00295132	0.151459	1.52166	0.605649
9785						1051.77	629.45	0.0656208	0.0426555	2.64101	0.00322399	0.152048	1.53839	0.621422
9244			TG(20:1(11Z)/20:5(5Z,8Z,11Z,14Z,17Z)/22:3(10Z,13Z,16Z))[iso6]	-19.0718		983.789	629.436	0.224341	0.152359	2.57125	0.00417279	0.160075	1.47245	0.558215
10149						1117.78	629.436	0.0157144	0.00931181	1.99506	0.0153039	0.204717	1.68758	0.754957
10424						1186.75	629.427	0.0173257	0.00950293	2.11941	0.00412959	0.159726	1.82319	0.866466
117						109.201	629.409	0.0136816	0.00785541	2.44752	0.00553476	0.168768	1.74168	0.800482
10561						1237.76	629.409	0.0361804	0.0226115	2.45391	0.00169024	0.146449	1.60009	0.67815
9232						982.782	629.407	0.353268	0.234612	2.66534	0.00309324	0.151778	1.50576	0.590488
10080						1101.79	629.407	0.21267	0.144436	2.44438	0.00512596	0.166558	1.47242	0.558189
10556						1236.76	629.404	0.0545096	0.0356498	2.53527	0.0029084	0.151356	1.52903	0.612617
10753						1304.75	629.36	0.02496	0.01602	2.23766	0.00738429	0.176735	1.55806	0.639747
10757						1305.75	629.329	0.0174514	0.00981631	2.29976	0.00243015	0.149984	1.77779	0.830088
10362						1170.78	629.323	0.030095	0.0173991	2.58047	0.00106631	0.140103	1.72969	0.790513
10871						1372.73	629.29	0.00981682	0.00562182	1.66354	0.0165125	0.210346	1.7462	0.804219
121						109.313	629.246	0.00678811	0.00327939	1.93363	0.0025947	0.15051	2.06993	1.04958
224						122.313	629.246	0.0105	0.00574619	2.48741	0.00290088	0.151338	1.82729	0.869709
10872						1373.74	629.188	0.00609343	0.00279747	2.03359	0.00215115	0.148919	2.17819	1.12313
163						114.759	629.157	0.0343108	0.0225898	2.25384	0.0143655	0.202551	1.51886	0.602987
225						122.425	629.157	0.00570965	0.00277877	2.32251	0.00239109	0.149849	2.05474	1.03896
10044						1092.76	629.153	0.00947337	0.00418233	2.12325	0.00682499	0.174705	2.26509	1.17957
10354						1168.77	629.096	0.120503	0.0769553	2.59073	0.00150178	0.14504	1.56589	0.646982
10077						1100.79	629.086	0.312312	0.213303	2.35251	0.00495214	0.165528	1.46417	0.550084
9673			TG(22:3(10Z,13Z,16Z)/22:3(10Z,13Z,16Z)/22:6(4Z,7Z,10Z,13Z,16Z,19Z))[iso3]	-19.0509		1033.8	628.943	0.765745	0.528347	2.36528	0.00601096	0.171189	1.44932	0.535377
9852						1059.82	628.811	0.0634214	0.0413415	2.0762	0.0401659	0.273303	1.53409	0.61738
8989						956.768	627.587	0.0593995	0.025283	2.85367	0.00046141	0.134761	2.34938	1.23228
8997			TG(20:2(11Z,14Z)/20:3(8Z,11Z,14Z)/20:3(8Z,11Z,14Z))[iso3]	-23.3932		957.769	627.583	0.0361751	0.0148643	2.8076	0.000887001	0.137521	2.43369	1.28314
9619			TG(22:4(7Z,10Z,13Z,16Z)/22:6(4Z,7Z,10Z,13Z,16Z,19Z)/22:6(4Z,7Z,10Z,13Z,16Z,19Z))[iso3]	-3.56984		1025.76	627.509	0.00567116	0.00132776	2.38767	0.00529853	0.167525	4.27123	2.09465
9612						1024.75	627.403	0.0110374	0.00309778	2.52592	0.0031812	0.151962	3.563	1.83309
9844						1058.81	627.131	0.0888246	0.0602775	2.12723	0.0366731	0.2677	1.47359	0.55934
9075			TG(17:2(9Z,12Z)/22:3(10Z,13Z,16Z)/22:6(4Z,7Z,10Z,13Z,16Z,19Z))[iso6]	16.3134		965.776	625.573	0.132029	0.0985203	2.28104	0.0364232	0.26729	1.34012	0.422362
102						107.2	625.563	0.00571277	0.00344591	2.35415	0.0260068	0.245237	1.65784	0.729303
10708						1286.73	623.552	0.00830209	0.00487784	1.60606	0.0288728	0.252467	1.702	0.767233
9993						1084.78	622.979	0.0507318	0.0332384	2.20111	0.00717085	0.175992	1.5263	0.610039
217						120.312	622.806	0.00312786	0.00157371	2.02909	0.0201449	0.226244	1.98758	0.99101
10516						1219.76	622.791	0.0178983	0.0102616	1.53253	0.00611799	0.171696	1.7442	0.802566
10513						1218.75	622.786	0.0311697	0.0203087	2.34588	0.00919672	0.185073	1.53479	0.618044
10300			AC2SGL(16:0/28:0(2Me[S],4Me[S],6Me[S],8Me[R],10Me[R],11OH))	-18.95		1151.76	622.584	0.0531723	0.0371084	2.43592	0.00767713	0.177696	1.43289	0.518928
10296						1150.76	622.534	0.0855946	0.0578436	2.45984	0.00351439	0.154035	1.47976	0.565362
9449						1006.74	622.53	0.0767867	0.0549319	2.30161	0.0202004	0.226458	1.39785	0.483213
9986						1083.78	622.491	0.15061	0.106565	2.60107	0.00375721	0.156453	1.41331	0.499081
9533			DAT(18:0/24:0(2Me[S],3OH[S],4Me[S],6Me[S]))	22.8562		1015.79	622.484	0.554239	0.395668	2.66443	0.00409189	0.159416	1.40077	0.486218
9454						1007.74	622.483	0.0496405	0.0353542	2.29476	0.023396	0.237589	1.40409	0.489636
9939						1075.74	622.448	0.0167041	0.0105837	2.43159	0.0231471	0.236798	1.57829	0.658361
9934						1074.73	622.298	0.032082	0.0209437	2.30383	0.0079602	0.178566	1.53183	0.615252
9553						1017.8	622.296	0.0593145	0.0410148	2.38715	0.0142737	0.202327	1.44617	0.532239
8804						940.766	622.004	0.077564	0.0555092	2.18141	0.0251698	0.242907	1.39732	0.482662
9984			MIPC(d18:0/26:0)	24.1711		1082.78	621.975	0.243322	0.182419	2.40113	0.0242225	0.240134	1.33386	0.415612
8790			TG(17:2(9Z,12Z)/20:5(5Z,8Z,11Z,14Z,17Z)/22:3(10Z,13Z,16Z))[iso6]	18.0459		939.762	621.955	0.242872	0.18291	2.17449	0.0331172	0.261431	1.32782	0.409063
76						104.421	621.953	0.00692788	0.00422985	2.01499	0.0302992	0.255688	1.63785	0.711807
74						104.31	621.938	0.0153162	0.00945224	2.28985	0.00732493	0.176532	1.62038	0.696329
9377			TG(19:0/22:5(7Z,10Z,13Z,16Z,19Z)/22:5(7Z,10Z,13Z,16Z,19Z))[iso3]	-24.2653		995.783	621.009	0.0180051	0.0102514	1.89923	0.0435522	0.281298	1.75636	0.812585
10909						1396.69	620.983	0.00526465	0.00291471	2.08918	0.0156125	0.205779	1.80623	0.852985
10139						1115.72	620.978	0.00730399	0.00437872	1.59032	0.0189356	0.221387	1.66806	0.738174
9929						1073.75	620.966	0.0397509	0.0274463	2.39439	0.0173592	0.214422	1.44832	0.534377
193						117.533	620.941	0.0101239	0.00642153	1.72999	0.0188109	0.220863	1.57656	0.656781
10624						1260.72	620.923	0.0402155	0.0302616	2.14269	0.0330927	0.261384	1.32893	0.410263
10803			M(IP)2C(t18:0/24:0(2OH))	-14.7108		1328.71	620.889	0.0174316	0.0120587	1.95901	0.038995	0.271357	1.44556	0.531627
10448						1192.73	620.881	0.0860988	0.0664336	2.1814	0.0387553	0.270979	1.29601	0.374081
10453						1193.74	620.881	0.0565631	0.0437481	2.02965	0.0477307	0.290296	1.29293	0.370642
9322						990.778	620.848	0.476356	0.377566	2.15086	0.0485685	0.291974	1.26165	0.335311
10194						1125.75	620.848	0.124069	0.0942732	2.14423	0.0298969	0.254802	1.31606	0.396224
10455						1194.74	620.848	0.0174939	0.0117868	1.93979	0.018652	0.220189	1.48419	0.569675
10627						1261.72	620.782	0.0291004	0.0195847	2.13737	0.00382614	0.157096	1.48587	0.571311
240						124.976	620.575	0.00464523	0.00330287	2.20319	0.0245557	0.241127	1.40642	0.492031
8485						912.744	619.977	0.0446604	0.0255185	2.44619	0.00225558	0.149346	1.75012	0.807453
9111						968.769	616.685	0.00964829	0.0045299	1.41426	0.0120776	0.196204	2.12991	1.09079
9563						1018.78	616.608	0.107359	0.0776436	2.08179	0.0217661	0.232187	1.38272	0.46751
9572			TG(21:0/22:6(4Z,7Z,10Z,13Z,16Z,19Z)/22:6(4Z,7Z,10Z,13Z,16Z,19Z))[iso3]	-21.1668		1019.79	616.527	0.0675367	0.0480403	2.06082	0.0253083	0.2433	1.40583	0.491427
148						112.534	612.385	0.0265054	0.0189854	2.10674	0.0396433	0.272442	1.39609	0.481394
10419						1184.73	610.284	0.0196481	0.0124133	1.97307	0.0438847	0.282055	1.58282	0.662497
118						109.089	610.242	0.0141553	0.00900342	1.96381	0.0478634	0.290564	1.57221	0.652796
9767						1048.76	610.224	0.19805	0.15089	2.12361	0.0466249	0.288018	1.31255	0.392373
9772						1049.76	610.224	0.119061	0.0894225	2.19677	0.0404932	0.273971	1.33144	0.412993
9222			TG(20:2(11Z,14Z)/20:5(5Z,8Z,11Z,14Z,17Z)/22:3(10Z,13Z,16Z))[iso6]	-18.8131		981.773	610.076	0.497202	0.381299	2.1621	0.0486715	0.292178	1.30397	0.382908
9215			NAPE(18:1(9Z)/16:1(9Z)/18:0)	-0.561533		980.768	609.771	0.818806	0.626063	2.1673	0.0466619	0.288096	1.30787	0.387214
10347						1166.76	609.231	0.0359124	0.0201802	2.29192	0.0055487	0.168839	1.77959	0.831542
10351						1167.76	609.185	0.022733	0.00944342	2.10016	0.000826101	0.137296	2.40729	1.26741
162						114.535	609.075	0.0177362	0.00866182	2.38296	0.00255125	0.150377	2.04763	1.03396
10074						1099.77	608.667	0.10177	0.0669191	2.2989	0.00460229	0.163265	1.5208	0.604828
10070			MIPC(d18:0/26:0(2OH))	22.6111		1098.77	608.65	0.157769	0.104765	2.55767	0.00265933	0.1507	1.50593	0.590659
9666			TG(22:3(10Z,13Z,16Z)/22:5(7Z,10Z,13Z,16Z,19Z)/22:5(7Z,10Z,13Z,16Z,19Z))[iso3]	-18.0607		1031.79	608.11	0.458735	0.322524	2.53875	0.00319994	0.152	1.42233	0.508255
9450						1006.78	605.654	0.455046	0.333658	2.30152	0.00784433	0.178217	1.36381	0.447644
10258						1140.74	605.426	0.146498	0.104261	2.14816	0.00719127	0.176065	1.40511	0.490688
10259						1141.75	605.423	0.0949445	0.0650438	2.28067	0.00495038	0.165517	1.4597	0.545673
9927						1072.75	605.423	0.447989	0.340226	2.17563	0.0188568	0.221056	1.31674	0.396969
9930						1073.76	605.422	0.291041	0.216836	2.25011	0.0145128	0.202907	1.34222	0.424619
9443			TG(20:5(5Z,8Z,11Z,14Z,17Z)/22:3(10Z,13Z,16Z)/22:4(7Z,10Z,13Z,16Z))[iso6]	-21.0235		1005.77	605.417	1.32848	0.977681	2.31842	0.0126535	0.197934	1.3588	0.442336
142						111.644	605.411	0.0863712	0.0591559	2.28069	0.00804306	0.178967	1.46006	0.546028
8964						954.698	604.89	0.168988	0.120321	1.9386	0.0163295	0.209431	1.40447	0.490025
8987						956.757	604.852	0.0216571	0.0122422	1.61602	0.0197501	0.224701	1.76906	0.822985
8977						955.726	604.769	0.112528	0.0782805	2.23104	0.0193081	0.222925	1.4375	0.523557
9310			TG(19:1(9Z)/22:6(4Z,7Z,10Z,13Z,16Z,19Z)/22:6(4Z,7Z,10Z,13Z,16Z,19Z))[iso3]	8.33455		989.769	597.935	0.018557	0.0102823	1.93854	0.0223295	0.234115	1.80475	0.851796
123						109.643	597.869	0.0261597	0.0161228	2.16418	0.00684155	0.174769	1.62253	0.698242
9283			DAT(16:0/24:0(2Me[S],3OH[S],4Me[S],6Me[S]))	24.9321		987.76	597.849	0.526537	0.416394	2.11604	0.0326811	0.260591	1.26452	0.338587
9647			DAT(18:0/25:0(2Me[S],3OH[S],4Me[S],6Me[S]))	-7.26278		1029.77	596.831	0.268869	0.180326	2.19877	0.0315348	0.2583	1.49102	0.576296
5320						696.608	589.801	0.290297	0.227632	1.75057	0.0278089	0.24991	1.27529	0.350823
1106						248.96	589.681	3.81789	3.48868	1.4064	0.0493514	0.293509	1.09437	0.130095
1554						316.948	589.635	2.99899	2.70679	1.54962	0.0298145	0.254619	1.10795	0.147893
646						180.973	589.624	2.19935	2.02327	1.70398	0.0330274	0.261259	1.08702	0.120384
2039						378.918	589.254	0.75688	0.671795	1.42556	0.0285505	0.251707	1.12665	0.172042
9213			NAPE(18:1(9Z)/16:1(9Z)/18:0)	-8.45783		980.761	588.104	0.0740538	0.0528048	2.08587	0.0385476	0.270664	1.40241	0.487905
9208			TG(20:3(8Z,11Z,14Z)/20:5(5Z,8Z,11Z,14Z,17Z)/22:3(10Z,13Z,16Z))[iso6]	-19.5858		979.757	588.035	0.242235	0.182328	2.05527	0.04578	0.28623	1.32857	0.409873
10137			MIPC(t18:0/26:0(2OH))	-11.4089		1114.73	588.033	0.026307	0.016082	2.14451	0.032327	0.259896	1.6358	0.709994
115						108.865	587.58	0.00548718	0.00270713	1.38721	0.0498699	0.294507	2.02694	1.0193
9199						978.753	587.465	0.491562	0.342114	2.40455	0.0111935	0.193273	1.43684	0.522895
9766			PE(16:0/18:1(9Z))-15-isoLG lactam	23.118		1048.75	587.11	0.0128361	0.00603593	2.4609	0.00786977	0.178294	2.12662	1.08856
9588			TG(22:6(4Z,7Z,10Z,13Z,16Z,19Z)/22:6(4Z,7Z,10Z,13Z,16Z,19Z)/22:6(4Z,7Z,10Z,13Z,16Z,19Z))	-2.87601		1021.73	584.315	0.0317383	0.0215257	2.07237	0.0366941	0.267734	1.47444	0.560164
4232						602.452	584.289	0.0663027	0.0550717	1.35992	0.0289006	0.252533	1.20393	0.267756
10254						1138.73	582.186	0.0344535	0.0223014	2.28389	0.0231393	0.236773	1.5449	0.627518
141						111.42	582.101	0.0151523	0.00831621	2.47527	0.00380931	0.156941	1.82202	0.865535
143						111.532	582.074	0.00645303	0.0031346	2.37808	0.00295579	0.151469	2.05865	1.0417
9921						1071.74	582.057	0.0738823	0.0507147	2.24843	0.00724655	0.17626	1.45682	0.542825
9915			MIPC(d18:0/24:0(2OH))	24.8662		1070.74	581.981	0.122298	0.0873964	2.29651	0.0103643	0.190168	1.39935	0.484759
9428			TG(20:5(5Z,8Z,11Z,14Z,17Z)/22:3(10Z,13Z,16Z)/22:5(7Z,10Z,13Z,16Z,19Z))[iso6]	-21.7852		1003.75	581.762	0.329531	0.23709	2.42485	0.009857	0.188069	1.3899	0.474981
10128						1112.71	580.433	0.0403892	0.0267269	1.73477	0.0136018	0.200608	1.51118	0.595677
9749						1045.73	578.96	0.0888594	0.0614294	1.99495	0.00978251	0.187747	1.44653	0.532597
9743						1044.72	578.958	0.145258	0.102027	2.29708	0.0102385	0.189663	1.42373	0.509676
9193			TG(20:4(5Z,8Z,11Z,14Z)/20:5(5Z,8Z,11Z,14Z,17Z)/22:3(10Z,13Z,16Z))[iso6]	-22.4483		977.738	578.922	0.384624	0.27327	2.26237	0.00978451	0.187756	1.40749	0.493121
9526						1014.68	578.699	0.017728	0.0236971	1.25986	0.045192	0.284959	0.748106	-0.418686
6275			PC(O-16:0/19:0)	-19.5431		760.608	574.248	0.160174	0.128324	1.81674	0.0396063	0.27238	1.2482	0.319854
5286						693.622	574.177	20.2045	14.5098	1.71302	0.0149799	0.203995	1.39248	0.477653
4691						647.615	574.086	0.431528	0.311171	1.95748	0.0149818	0.203999	1.38679	0.471745
5128						682.59	573.774	6.09277	4.12209	1.33593	0.0426349	0.279172	1.47808	0.563723
9339						992.663	565.813	0.059522	0.0507355	1.38958	0.0416285	0.27677	1.17318	0.230427
8086			PC(21:0/22:2(13Z,16Z))	9.24949		882.704	564.106	0.0223102	0.0146979	1.6776	0.00439471	0.161785	1.51792	0.602092
5306			22:6 Cholesteryl ester	22.7354		695.593	563.543	1.0878	0.844851	2.05293	0.0110644	0.192814	1.28756	0.364642
5327						696.598	563.398	0.460979	0.361252	1.96369	0.017891	0.216858	1.27606	0.351694
7369			PC(18:0/22:4(7Z,10Z,13Z,16Z))	11.6689		836.627	563.131	0.0678569	0.0939504	1.91389	0.0097625	0.18766	0.722264	-0.469403
4560			Cer(d18:2/23:0)	-3.09104		632.597	563.091	0.0726318	0.0491389	1.50913	0.0345678	0.264108	1.47809	0.563736
5337			22:5 Cholesteryl ester	8.62482		697.599	562.736	0.091794	0.0665539	1.71047	0.00890015	0.183618	1.37924	0.463877
5090						679.606	562.69	1.87669	1.38699	1.49808	0.0317676	0.258776	1.35306	0.436226
5118						681.614	560.871	0.115034	0.0898409	1.341	0.0288744	0.252471	1.28042	0.356618
4531						629.557	559.942	0.452535	0.423611	1.62093	0.0195509	0.223907	1.06828	0.0952895
4789						655.581	559.928	1.34847	1.23848	1.4455	0.0316049	0.258444	1.08881	0.122758
4515						627.559	559.901	1.46318	1.35226	1.40065	0.0336701	0.262472	1.08202	0.113733
4089						591.582	559.879	0.0833577	0.0778246	1.20543	0.0432769	0.280666	1.0711	0.0990894
10087						1103.61	556.713	0.979729	0.854656	1.62991	0.046019	0.28674	1.14634	0.197039
5234			TG(12:0/14:1(9Z)/14:1(9Z))[iso3]	13.8743		689.582	554.808	1.11637	0.95411	1.21736	0.0453239	0.285246	1.17007	0.22659
9524			MIPC(d18:0/20:0(2OH))	-19.2923		1014.63	554.468	0.0145929	0.0188607	1.27851	0.0278401	0.249987	0.773718	-0.37012
8883						946.643	553.957	0.0939909	0.113418	1.64299	0.0152838	0.204673	0.828713	-0.271055
791						208.168	553.928	0.0185701	0.02566	1.08074	0.0387998	0.271046	0.723699	-0.466538
7364			TG(17:2(9Z,12Z)/17:2(9Z,12Z)/17:2(9Z,12Z))	-14.3867		835.67	553.605	0.166247	0.223975	1.73376	0.00275866	0.150975	0.742256	-0.43001
9385						996.659	549.723	0.109949	0.0837637	1.60993	0.0167659	0.211592	1.31261	0.392443
9815						1055.62	549.286	0.275145	0.238696	1.77475	0.0458565	0.286393	1.1527	0.205019
9361						994.655	549.131	1.64654	1.39707	1.8886	0.0204631	0.22746	1.17856	0.237028
10186						1124.61	549.124	0.0633242	0.0467553	1.24784	0.0260609	0.245385	1.35438	0.437628
10178						1123.61	549.093	0.131093	0.114052	1.90605	0.0465227	0.287804	1.14942	0.2009
9882						1063.64	549.035	0.183449	0.155052	2.12359	0.00691017	0.175032	1.18315	0.242634
9873						1062.64	548.982	0.575753	0.483582	2.0869	0.00926115	0.18538	1.1906	0.251689
9864						1061.64	548.658	1.01797	0.889783	1.9836	0.0246022	0.241264	1.14406	0.194168
10224			PIM2(16:0/16:1(9Z))	17.8309		1131.63	548.559	0.0508363	0.0367905	2.30643	0.00711512	0.175792	1.38178	0.466526
10218						1130.63	548.115	0.222559	0.189895	2.37173	0.00505591	0.16615	1.17201	0.22899
10211						1129.62	548.038	0.391327	0.33433	2.20104	0.00867395	0.182457	1.17048	0.227102
10469						1197.61	547.561	0.149566	0.127319	1.65515	0.0471636	0.289136	1.17473	0.232333
10475						1198.61	547.53	0.0734709	0.0546732	1.10028	0.0302195	0.255514	1.34382	0.426339
4989						670.599	547.49	0.0270849	0.0387424	1.06762	0.0103068	0.189939	0.699102	-0.516426
4477						622.577	546.362	0.0316465	0.045064	1.18509	0.0402641	0.273463	0.702257	-0.50993
5423						703.62	545.669	0.126471	0.103919	1.43443	0.0497599	0.294296	1.21701	0.283338
5830						729.636	545.247	0.256862	0.205639	1.32378	0.00215367	0.14893	1.24909	0.32088
5116						681.577	545.222	5.3065	4.67433	1.89194	0.0332669	0.261715	1.13524	0.183001
5143			PE-Cer(d14:2(4E,6E)/22:1(13Z))	11.5484		683.521	544.796	0.738824	0.636005	2.18602	0.011204	0.19331	1.16166	0.216193
5516			DGTS(16:0/16:0)	11.8604		710.602	544.76	0.119004	0.10267	2.20577	0.00637909	0.172872	1.15909	0.212989
6260			PA(18:0/22:0)	5.25021		759.595	544.76	0.0208724	0.0148886	1.18974	0.0335558	0.262259	1.40191	0.487392
6901			PA(22:1(11Z)/22:4(7Z,10Z,13Z,16Z))	11.1036		805.584	544.703	0.340023	0.285976	2.36221	0.00634489	0.172723	1.18899	0.249736
5130						682.578	544.691	2.39394	2.10961	1.9498	0.0297436	0.25446	1.13478	0.182407
3419			32,35-anhydrobacteriohopaneterol	-2.51261		527.446	544.082	0.539154	0.495946	1.15165	0.0248137	0.241882	1.08712	0.120514
9468						1009.71	537.68	0.0205232	0.0116107	1.11928	0.0297667	0.254512	1.76761	0.8218
10023						1089.59	536.604	0.049794	0.0614464	1.67143	0.0147125	0.203379	0.810364	-0.303357
10030						1090.6	536.563	0.0155644	0.0231662	2.14419	0.000316989	0.132812	0.671857	-0.573775
10324						1157.58	536.504	0.0176514	0.0242755	1.72104	0.0116098	0.194698	0.727129	-0.459716
4238						602.865	535.918	0.0165711	0.01237	1.67422	0.0378897	0.269647	1.33962	0.421819
5886			PG(O-20:0/14:1(9Z))	7.06736		733.544	535.517	0.0389949	0.0313621	2.2388	0.0202954	0.226823	1.24338	0.314263
5472						707.594	535.503	0.286885	0.240227	2.22093	0.0269327	0.247694	1.19422	0.256071
5105						680.574	535.475	0.780941	0.634802	2.1415	0.03709	0.268373	1.23021	0.298909
5637						718.855	535.443	0.00944961	0.00688491	1.61436	0.0392846	0.271841	1.37251	0.456817
5091			PG(O-16:0/14:0)	20.7799		679.506	535.402	1.7871	1.41172	2.49558	0.00586543	0.170475	1.2659	0.340163
5228			PE-Cer(d15:1(4E)/20:0(2OH))	15.5732		689.535	535.396	3.32578	2.53742	1.86311	0.0401086	0.273209	1.31069	0.390328
330						139.007	535.315	0.178506	0.148431	1.29276	0.0397339	0.272592	1.20262	0.266179
4891						663.487	534.99	0.852884	0.786328	2.19771	0.00847408	0.181394	1.08464	0.117219
5117						681.504	534.907	0.521413	0.430341	2.16371	0.0499368	0.294635	1.21163	0.276947
5460			bacteriohopane-,32,33,34-triol-35-cyclitol	-1.26595		706.525	534.838	0.679157	0.573563	2.25379	0.0348045	0.264528	1.1841	0.243793
2859						473.385	534.388	0.315333	0.265407	1.62443	0.0109076	0.192245	1.18811	0.248669
4526						629.491	532.788	0.0751846	0.0636164	2.05065	0.0146335	0.203193	1.18184	0.241039
4628						639.567	532.742	0.0685765	0.0562196	1.91933	0.0333472	0.261867	1.2198	0.286642
4551			PE-Cer(d14:1(4E)/18:0)	11.5409		631.489	532.735	0.022514	0.0178686	2.18295	0.00677826	0.174522	1.25998	0.333396
9318						990.645	531.14	0.035763	0.0254647	2.22585	0.000269767	0.132012	1.40441	0.489969
7917						872.663	531.115	0.0312183	0.0196276	2.17726	0.00207053	0.148561	1.59053	0.669507
8607						922.658	531.108	0.177568	0.144408	2.21466	0.00330273	0.152201	1.22963	0.298221
7638			PC(19:0/22:2(13Z,16Z))	7.98811		854.671	531.088	0.945428	0.749298	2.23689	0.00138497	0.143992	1.26175	0.335428
6245						758.455	530.816	0.0760962	0.0602368	1.525	0.00592555	0.170774	1.26329	0.337181
9880						1063.59	528.942	0.0134033	0.0196141	1.32895	0.0249331	0.242228	0.683352	-0.549299
9872						1062.58	527.904	0.0346332	0.0444259	1.7312	0.012141	0.196401	0.779571	-0.359247
4980			20:5 Cholesteryl ester	1.45921		669.563	527.562	0.0096106	0.00564321	1.06721	0.0106594	0.191317	1.70304	0.76811
7751						861.632	527.486	0.0200537	0.0299992	1.65807	0.0114644	0.19421	0.668473	-0.581059
3112			2alpha-(benzyloxy)-1alpha,25-dihydroxy-19-norvitamin D3 / 2alpha-(benzyloxy)-1alpha,25-dihydroxy-19-norcholecalciferol	-3.29897		509.362	527.468	0.655737	0.587822	1.56513	0.0194725	0.223592	1.11554	0.157737
4967						668.562	527.423	0.0419794	0.0324541	1.35279	0.027121	0.248179	1.2935	0.371282
4937						666.56	527.35	0.0985778	0.0796608	1.37683	0.0473143	0.289446	1.23747	0.307394
7725			PC(20:0/22:6(4Z,7Z,10Z,13Z,16Z,19Z))	11.9445		860.628	526.649	0.207639	0.247653	1.03234	0.0499673	0.294693	0.838428	-0.254241
5374			Crasseride 2a	16.6258		699.59	526.26	0.0455218	0.0345663	1.11157	0.029418	0.253725	1.31694	0.397191
9356						994.596	526.199	0.112515	0.136867	1.13021	0.0306271	0.256396	0.822081	-0.282647
8809						941.568	524.109	0.0437967	0.0544616	1.49256	0.0250633	0.242603	0.804176	-0.314416
5740			Phalluside-1	2.03847		724.538	522.585	0.504639	0.460714	1.34764	0.0337924	0.262699	1.09534	0.13138
4245						603.533	522.506	0.105563	0.0860857	1.3013	0.00169977	0.146512	1.22625	0.294258
4507						626.547	522.49	9.67586	8.58439	1.00856	0.037885	0.26964	1.12715	0.172674
4516						627.552	522.485	3.84574	3.64417	1.86012	0.0016219	0.145973	1.05531	0.0776718
4699						648.591	522.485	0.379837	0.355929	1.95906	0.0028295	0.15116	1.06717	0.09379
4204						599.529	522.48	4.30297	4.05906	1.92249	0.00181882	0.147255	1.06009	0.0841881
4524						628.553	522.48	0.855734	0.795122	2.18267	0.00023364	0.131193	1.07623	0.105987
4215						600.532	522.455	1.68551	1.59457	1.86003	0.00293504	0.15142	1.05703	0.0800208
4234						602.529	522.4	0.587644	0.541228	1.38332	0.0125101	0.197515	1.08576	0.118706
4764						653.584	521.968	0.0795838	0.0752095	1.01489	0.0452196	0.285019	1.05816	0.081561
10094						1104.56	519.16	0.126668	0.0966043	1.38244	0.00944648	0.186244	1.3112	0.390893
9691						1036.57	519.142	0.342006	0.302333	1.96982	0.0348764	0.264655	1.13122	0.177886
9702						1037.57	518.852	0.180462	0.155117	1.97099	0.0113487	0.193814	1.16339	0.218331
9664						1031.56	518.251	0.0184451	0.0141185	1.60606	0.0448047	0.28411	1.30645	0.385655
10200						1127.61	514.984	0.243213	0.19847	1.78918	0.00694896	0.175179	1.22544	0.293303
5450						705.577	514.583	0.966211	0.819532	1.76609	0.0302889	0.255665	1.17898	0.237537
5461						706.583	514.342	0.420121	0.357861	1.50474	0.0473285	0.289475	1.17398	0.231406
5705						723.453	514.273	0.512575	0.43604	1.78933	0.0322074	0.259659	1.17552	0.233303
7999			PI(15:0/22:1(11Z))	6.21531		877.587	513.951	0.0705783	0.080695	1.50919	0.0342924	0.263613	0.87463	-0.193255
9236						983.541	512.253	0.150758	0.122573	1.04715	0.0375753	0.269151	1.22994	0.298584
30						101.62	511.705	0.0236659	0.0185734	1.40708	0.023674	0.238459	1.27419	0.349576
8497						914.551	511.68	0.708549	0.620419	1.21625	0.0473828	0.289587	1.14205	0.191623
37						101.731	511.595	0.0067885	0.00437949	1.70806	0.0129869	0.198908	1.55007	0.632329
9774			CDP-DG(18:1(11Z)/22:6(4Z,7Z,10Z,13Z,16Z,19Z))	-0.37222		1050.52	511.276	0.0953225	0.0766712	1.4694	0.0136546	0.200748	1.24326	0.314132
9564			FMC-5(d18:1/24:1)	9.26287		1018.73	509.511	0.0932852	0.0679039	1.75039	0.0156499	0.205972	1.37378	0.458152
9540						1016.73	509.481	0.490061	0.385145	1.62298	0.0140046	0.201655	1.2724	0.347558
9144			TG(20:5(5Z,8Z,11Z,14Z,17Z)/20:5(5Z,8Z,11Z,14Z,17Z)/22:5(7Z,10Z,13Z,16Z,19Z))[iso3]	7.32934		971.721	509.463	0.0348358	0.0237118	1.5469	0.013542	0.200448	1.46914	0.554968
9552						1017.73	509.463	0.302327	0.234817	1.70279	0.0163314	0.209441	1.2875	0.364574
9136			LacCer(d18:1/24:1(15Z))	-2.99631		970.717	509.416	0.0637648	0.0458409	1.80844	0.0201348	0.226206	1.391	0.476127
9997						1085.71	509.403	0.0593705	0.0438204	1.93811	0.00398243	0.15849	1.35486	0.438143
5106						680.565	509.39	0.39088	0.315504	1.76971	0.00964855	0.187158	1.23891	0.30907
9990						1084.71	509.39	0.102734	0.0734666	2.13147	0.00202602	0.148352	1.39838	0.483754
5092						679.564	509.02	0.820747	0.656313	2.13497	0.00310433	0.151802	1.25054	0.322554
4742						652.543	508.792	0.382036	0.299883	1.88065	0.00792769	0.178469	1.27395	0.34931
9421						1002.58	508.474	0.0114118	0.0167416	2.09006	0.00882116	0.183218	0.681644	-0.552909
7895			PS(20:0/22:1(11Z))	-21.9858		872.619	508.233	1.15227	1.34373	1.56501	0.0446265	0.283716	0.857511	-0.221772
7930			alpha,alpha'-Trehalose 4,6-dioleate	-9.32752		873.623	508.084	0.288183	0.348187	1.72606	0.0347587	0.264447	0.827666	-0.272879
9414						1001.57	507.959	0.0602154	0.072089	1.71579	0.0371656	0.268496	0.835293	-0.259645
4788						655.549	507.91	0.062238	0.0503657	1.62279	0.0346743	0.264297	1.23572	0.305353
10004						1086.59	504.006	0.0240838	0.0151523	1.79562	0.0188631	0.221083	1.58945	0.668527
8412						906.66	500.304	0.193656	0.120734	2.5272	0.00409497	0.159441	1.60399	0.681661
8427			PI(O-20:0/20:0)	-1.44805		907.663	500.294	0.1112	0.0702167	2.33871	0.00520557	0.167011	1.58366	0.663266
9167						974.645	500.274	0.0201986	0.0114471	2.22245	0.00232584	0.149614	1.76452	0.819273
8584						920.645	499.759	0.0240067	0.0189672	2.01848	0.00723203	0.176209	1.2657	0.339933
9536						1016.5	499.302	0.192074	0.172844	2.05314	0.0140428	0.201751	1.11126	0.152193
8774						938.487	499.286	0.0271265	0.021363	2.17078	0.00650967	0.173431	1.26979	0.344588
9546						1017.51	499.279	0.0861278	0.0776547	1.72572	0.0378256	0.269546	1.10911	0.149406
9995			LPIM3(18:0/0:0)	13.7504		1085.49	499.217	0.0319466	0.0249168	1.6018	0.00705188	0.175561	1.28213	0.35854
5454			PG(O-16:0/16:1(9Z))	6.10376		705.512	498.564	0.033082	0.0242045	1.43261	0.0464797	0.287714	1.36677	0.450771
5086			PG(O-16:0/14:0)	6.52389		679.496	496.609	0.126586	0.0945159	2.46529	0.00223161	0.149252	1.3393	0.421484
5073						678.494	496.543	0.269141	0.20049	2.51353	0.000806936	0.137219	1.34242	0.424832
4724			PG(O-16:0/12:0)	24.5473		651.477	495.99	0.618302	0.49209	2.46311	0.00180764	0.147189	1.25648	0.329387
4879			PC(O-16:0/12:0)	-7.51401		662.508	495.988	0.561076	0.438501	1.98772	0.0133713	0.199986	1.27953	0.355616
4735						652.48	495.986	0.263634	0.204728	2.59458	0.000911588	0.137604	1.28773	0.364826
4752						653.474	495.982	0.173547	0.135755	2.25663	0.00480768	0.164626	1.27838	0.354319
4869			PA(O-20:0/14:0)	-17.5109		661.506	495.981	1.21981	0.946952	2.00167	0.0138927	0.201369	1.28814	0.365294
4769						654.477	495.971	0.0703399	0.0525543	2.23831	0.00434558	0.161419	1.33842	0.420534
2676						452.922	495.866	0.332575	0.204378	1.80776	0.00212025	0.148785	1.62725	0.70244
10402						1179.78	494.892	0.29215	0.241849	1.31101	0.0439255	0.282147	1.20798	0.272602
10586						1246.76	494.886	0.085316	0.064523	1.4795	0.0114514	0.194166	1.32226	0.403003
10590						1247.77	494.886	0.0548897	0.0434876	1.40327	0.0219888	0.232957	1.26219	0.335929
10781						1314.75	494.802	0.0100497	0.00542544	1.59381	0.00770332	0.177779	1.85233	0.88934
9467			PIM1(19:0/16:2(9Z,12Z))	-18.1749		1009.57	492.174	0.016606	0.0225212	1.10581	0.0421473	0.278018	0.73735	-0.439579
10172						1122.54	492.122	0.0317407	0.0415767	1.32047	0.0107914	0.191815	0.763426	-0.389439
822						214.154	492.106	0.00544433	0.00887802	1.5978	0.0280076	0.250398	0.613236	-0.705485
9804			Nystatin A3	-6.31737		1054.55	491.995	0.0708912	0.0901503	1.46004	0.00867791	0.182478	0.786367	-0.346726
53						102.847	491.822	0.0558967	0.0694385	1.32443	0.0348539	0.264615	0.804982	-0.312971
9274						987.569	491.68	0.0640393	0.0803836	1.32851	0.03861	0.270759	0.796671	-0.327945
48						102.736	491.667	0.113821	0.14493	1.34809	0.0033309	0.152254	0.785357	-0.348579
9336						992.584	491.667	0.717628	0.852861	1.2497	0.0207036	0.228362	0.841436	-0.249074
8814						941.584	491.662	0.0363267	0.0500582	1.746	0.0149911	0.20402	0.725689	-0.462576
9266						986.563	491.651	0.122117	0.148022	1.32548	0.0381861	0.270108	0.824993	-0.277546
8646						926.603	491.65	0.376681	0.456303	1.23487	0.0299739	0.254973	0.825507	-0.276648
9814						1055.55	491.622	0.0287785	0.0423579	1.57563	0.00524997	0.167259	0.679413	-0.55764
7697						859.615	491.604	0.411826	0.50257	1.20862	0.041927	0.27749	0.81944	-0.28729
8621						924.593	491.092	2.44932	2.9118	1.21403	0.0399712	0.272984	0.841172	-0.249528
7896						872.564	489.265	0.392666	0.323547	2.95579	0.000105081	0.124151	1.21363	0.279326
8700						930.659	488.935	0.0625615	0.0443066	2.23272	0.0288973	0.252525	1.41201	0.497752
8715			PI(O-20:0/22:2(13Z,16Z))	-4.14101		931.661	488.929	0.0307848	0.0203589	2.05152	0.0294649	0.253832	1.5121	0.596557
4355						614.357	485.844	0.0789182	0.062541	1.95018	0.00145407	0.14463	1.26186	0.335556
9535			UDP-2,3-diacyl-GlcN	24.4468		1016.48	485.122	0.0711206	0.0597361	1.32364	0.0306629	0.256473	1.19058	0.251666
9593						1022.49	485.083	0.149989	0.118428	2.24324	0.0012285	0.142308	1.2665	0.340851
5039			PG(P-16:0/14:1(9Z))	21.2653		675.475	484.577	0.0709621	0.0546035	1.80549	0.0370273	0.268273	1.29959	0.378055
3357			PC(O-1:0/O-18:0)	-6.01605		522.39	484.574	0.244937	0.218097	1.81645	0.00410512	0.159525	1.12307	0.167443
8969						955.51	484.043	0.25615	0.231529	2.15175	0.0354167	0.265596	1.10634	0.145792
5170			PA(O-16:0/20:2(11Z,14Z))	-19.022		685.505	484.04	0.183089	0.148279	1.60787	0.0472396	0.289293	1.23476	0.304227
8603						922.652	480.799	0.238206	0.130087	2.36933	0.00091827	0.137625	1.83113	0.872731
4205						599.518	479.198	1.82265	1.60745	1.87919	0.00640103	0.172967	1.13388	0.181263
4216						600.522	479.196	0.386136	0.341705	1.69057	0.012627	0.197857	1.13003	0.176356
3852						572.5	479.181	0.572952	0.503799	1.53932	0.0324693	0.260177	1.13726	0.185565
4340						613.516	478.666	0.264059	0.205352	1.96957	0.0396524	0.272457	1.28589	0.362762
4359						614.519	478.661	0.0794179	0.0602343	2.03799	0.0458415	0.286361	1.31848	0.398879
6452			DGCC(16:0/20:5)	-6.21086		772.569	478.19	0.0479555	0.0724673	1.55454	0.0137915	0.201107	0.661754	-0.595633
7052			PG(17:0/22:2(13Z,16Z))	20.9745		815.598	478.135	0.169372	0.237183	1.16466	0.0337937	0.262701	0.7141	-0.485803
8667						928.528	476.452	0.128938	0.100849	1.20575	0.0499299	0.294622	1.27852	0.354475
1080						242.943	473.765	0.377883	0.328743	1.45397	0.049642	0.29407	1.14948	0.200978
3135						510.364	473.276	0.115849	0.0939802	1.45197	0.0365007	0.267418	1.2327	0.301818
6830			PS(15:0/22:2(13Z,16Z))	19.094		800.56	471.579	0.338868	0.431087	1.11261	0.0152486	0.204596	0.786077	-0.347258
5171			PA(O-16:0/20:2(11Z,14Z))	-19.1654		685.505	466.835	0.13948	0.114329	1.05097	0.0348479	0.264605	1.21999	0.286872
7966			PI(15:0/22:2(13Z,16Z))	7.92724		875.572	465.116	0.0871472	0.0685597	1.76044	0.0270547	0.248009	1.27111	0.346095
7897						872.563	465.061	4.55615	3.96356	2.66585	0.00679703	0.174596	1.14951	0.201019
7921			PG(22:2(13Z,16Z)/22:6(4Z,7Z,10Z,13Z,16Z,19Z))	1.24438		873.566	464.602	2.26055	2.00517	2.551	0.010845	0.192014	1.12736	0.172948
4502						625.523	462.936	0.0832863	0.0579048	2.41704	0.00388433	0.157625	1.43833	0.524397
8043			PI(O-20:0/18:0)	-3.54356		879.63	461.892	0.0775054	0.0447165	2.662	0.0017163	0.146621	1.73326	0.793489
8353			Avermectin A2a	6.99168		903.517	459.188	0.30665	0.265248	1.1707	0.042662	0.279235	1.15609	0.209249
11074						1459.09	457.477	0.0139342	0.0254691	1.08922	0.0279681	0.250301	0.547105	-0.870111
6613			PS(14:1(9Z)/22:2(13Z,16Z))	-2.28053		784.512	455.327	1.06579	0.963623	2.0602	0.044835	0.284177	1.10602	0.145382
6622			PG(15:1(9Z)/22:2(13Z,16Z))	-24.7114		785.514	455.304	0.482941	0.437389	2.07966	0.0405175	0.274032	1.10415	0.142933
4609						637.516	455.064	0.140546	0.118359	2.71086	0.00356537	0.154564	1.18745	0.247868
4714						650.497	454.916	0.0259396	0.0190183	2.3027	0.0149827	0.204001	1.36393	0.447767
7602			PS(22:6(4Z,7Z,10Z,13Z,16Z,19Z)/20:5(5Z,8Z,11Z,14Z,17Z))	15.7011		852.496	454.916	0.175004	0.139527	2.32994	0.00489324	0.165165	1.25427	0.326848
7615			PI(16:1(9Z)/20:5(5Z,8Z,11Z,14Z,17Z))	15.0961		853.5	454.897	0.0770087	0.0598613	2.15458	0.0115307	0.194434	1.28645	0.363398
4475						622.524	454.872	0.140488	0.12426	2.30199	0.0297826	0.254548	1.1306	0.177089
3853						572.48	454.861	4.62125	3.73241	2.87106	0.00175036	0.146839	1.23814	0.308178
3878						575.482	454.858	0.537017	0.436345	2.70466	0.0046746	0.163755	1.23072	0.299497
3863			Mayolene-19	-7.44496		573.485	454.83	1.76676	1.45048	2.73063	0.00432214	0.161242	1.21805	0.284577
3871						574.477	454.824	1.40513	1.15124	2.69274	0.00496316	0.165595	1.22054	0.28752
4213						600.504	454.754	2.52755	2.07798	2.78151	0.00149465	0.14498	1.21635	0.282555
4226						601.507	454.752	0.528555	0.436662	2.72187	0.00302512	0.151628	1.21044	0.275536
4620						638.518	454.751	0.0418068	0.0335636	1.63013	0.0227191	0.235409	1.2456	0.316837
4457						620.537	454.735	0.574127	0.496497	2.66835	0.00752332	0.177199	1.15636	0.209586
3885			Cer(d14:2(4E,6E)/22:1(13Z)(2OH))	-24.8298		576.485	454.713	0.0860335	0.0640715	2.62614	0.00318829	0.151976	1.34277	0.425216
5313			PE(O-16:0/18:4(6Z,9Z,12Z,15Z))	-16.9613		696.485	454.338	0.23605	0.183879	2.6936	0.00335436	0.152298	1.28373	0.360339
5920			PC(P-16:0/18:4(6Z,9Z,12Z,15Z))	-2.20979		736.527	453.177	2.45303	3.30996	1.51263	0.046806	0.288396	0.741107	-0.432246
1077						242.943	450.803	0.440444	0.383248	1.43027	0.0310872	0.257372	1.14924	0.20068
5438			PC(O-16:0/15:0)	13.2336		704.569	448.375	0.0801572	0.0543033	1.60258	0.0132087	0.199536	1.4761	0.561792
365						146.966	448.259	0.519846	0.415459	1.49354	0.012949	0.198799	1.25126	0.323379
4146						596.347	448.173	0.0431571	0.0336694	1.65596	0.0325334	0.260303	1.28179	0.358162
4352						614.357	447.859	0.160478	0.12751	1.52546	0.0202224	0.226543	1.25856	0.33177
8371						904.568	446.652	0.09286	0.0609356	2.06023	0.00315664	0.151912	1.5239	0.607771
8583						920.637	445.34	0.0677753	0.0398592	2.22942	0.00647632	0.17329	1.70036	0.765844
7657			PS(19:0/22:2(13Z,16Z))	-9.67288		856.599	444.987	1.28967	1.52028	1.06299	0.0267545	0.247231	0.848309	-0.237339
4170			Kurilensoside G	4.53882		597.367	444.192	0.606913	0.377418	1.59761	0.0169434	0.212451	1.60807	0.685326
8879						946.575	443.989	0.179069	0.152434	1.74997	0.0279485	0.250253	1.17473	0.232329
8947						953.494	442.852	0.057046	0.0396836	2.32742	0.000811152	0.137236	1.43752	0.523584
9574						1020.48	442.801	0.0247558	0.0148903	2.14478	0.0116475	0.194823	1.66255	0.733394
8936			CDP-DG(16:0/16:0)	-16.9782		952.491	442.775	0.127753	0.106261	1.85831	0.00458287	0.163131	1.20225	0.265737
6837			PS(15:0/22:2(13Z,16Z))	-7.95232		800.538	442.76	0.032479	0.0244089	1.38286	0.0393431	0.271939	1.33062	0.412102
8245						895.624	440.645	0.0463352	0.0193306	2.8299	0.000608956	0.136141	2.39699	1.26123
7252			PG(18:0/22:2(13Z,16Z))	-19.3392		829.58	439.265	19.4068	23.2537	1.33778	0.0162887	0.209226	0.834569	-0.260896
11021						1448.04	436.777	0.242696	0.310843	1.42851	0.0357695	0.266198	0.780767	-0.357035
11025						1449.04	436.753	0.0757078	0.0978264	1.31541	0.0498784	0.294523	0.773899	-0.369783
11014						1446.03	436.743	0.576884	0.743289	1.45571	0.0284862	0.251554	0.776123	-0.365643
11017						1447.04	436.743	0.52069	0.666726	1.40926	0.0392358	0.271758	0.780966	-0.356669
6623						785.508	436.577	0.0536512	0.0682192	1.59401	0.0216155	0.23166	0.786453	-0.346567
10684						1275.88	436.377	0.0382299	0.0451656	1.01787	0.0438007	0.281864	0.84644	-0.24052
8642						926.476	436.217	0.224471	0.190961	1.86602	0.0148881	0.203786	1.17548	0.233251
3302						520.392	433.608	6.98439	6.52398	2.06429	0.0208846	0.229032	1.07057	0.0983829
3526			PC(O-16:0/3:0)	13.9518		536.38	432.521	0.274984	0.232479	1.86276	0.0420529	0.277792	1.18284	0.24225
4029						586.489	432.435	0.13099	0.107973	1.90393	0.0495546	0.293902	1.21317	0.27878
4017						585.483	432.423	0.371715	0.304966	1.91931	0.0375677	0.269139	1.21887	0.285548
3142						510.364	432.168	0.148517	0.116877	1.85487	0.0275137	0.249175	1.27072	0.345643
3594						543.465	431.236	0.0706233	0.0628954	1.34139	0.048436	0.291711	1.12287	0.16719
3688						554.498	431.056	0.252976	0.242109	1.72975	0.0159118	0.207313	1.04488	0.0633435
3946			PS(22:0/0:0)	-6.23339		580.358	430.927	0.607277	0.514736	1.39601	0.0301753	0.255417	1.17978	0.238524
3678			38:5(23Z,26Z,29Z,32Z,35Z)	-9.78582		553.494	430.858	0.69654	0.667929	1.78555	0.0094533	0.186275	1.04283	0.0605104
3481						533.35	429.899	0.560566	0.484224	1.49443	0.031601	0.258436	1.15766	0.211209
1252			Gummiferol	21.04		285.083	429.687	0.226848	0.187697	1.86843	0.00705334	0.175567	1.20859	0.273323
9451						1007.53	428.849	0.122554	0.0984416	1.58193	0.0217828	0.232245	1.24494	0.316076
8150						887.534	428.583	0.0890081	0.0784736	1.52712	0.0350458	0.264952	1.13424	0.181729
9446						1006.52	428.522	0.262597	0.223353	1.71626	0.0378364	0.269563	1.1757	0.233525
4263						606.51	427.66	0.0741976	0.0452104	1.85118	0.0153993	0.204925	1.64116	0.714717
8775						938.533	427.579	1.17644	1.08472	2.03479	0.0130189	0.199	1.08455	0.117101
8783						939.537	427.472	0.572942	0.532853	2.00546	0.0188351	0.220965	1.07524	0.104652
687						186.63	423.188	0.0418733	0.0547799	1.0373	0.0230533	0.236497	0.764393	-0.387614
691						186.881	423.13	0.00865262	0.0137682	1.28963	0.0024558	0.15007	0.628447	-0.670136
11199						1495.03	423.126	0.037743	0.0565138	1.3431	0.0264312	0.246379	0.667855	-0.582394
3257						519.391	419.565	12.5621	11.5474	1.81775	0.020339	0.226989	1.08787	0.121504
3288						520.392	419.529	4.54708	4.18863	1.96038	0.0319762	0.259197	1.08558	0.118462
8308						900.499	418.375	0.12555	0.112395	1.71428	0.0190002	0.221656	1.11704	0.159683
5478						708.497	411.841	0.0802453	0.118413	1.35276	0.0201894	0.226416	0.677675	-0.561335
5497						709.5	411.13	0.0198344	0.037078	1.4058	0.0179272	0.21702	0.534939	-0.902554
5633			PC(10:0/21:0)	-2.12564		718.538	409.832	0.0220654	0.00708149	2.6419	0.000643979	0.136378	3.11592	1.63966
440						154.947	407.202	0.144098	0.13076	1.85705	0.0226207	0.235085	1.10201	0.140132
3947			PS(22:0/0:0)	-6.45975		580.358	406.829	0.54262	0.510545	1.85458	0.0437537	0.281758	1.06283	0.0879044
1991						375.293	405.967	1.36607	1.13135	1.28626	0.0325926	0.260419	1.20746	0.271981
9291						988.549	405.228	0.0861906	0.103935	1.1053	0.0387929	0.271036	0.829277	-0.270074
8589			PI(19:1(9Z)/22:6(4Z,7Z,10Z,13Z,16Z,19Z))	19.1879		921.568	404.985	0.167123	0.209551	1.31238	0.0353829	0.265537	0.797526	-0.326396
8575						920.561	404.697	0.36178	0.442936	1.35882	0.0403161	0.273547	0.816777	-0.291986
7618			PG(20:0/22:4(7Z,10Z,13Z,16Z))	-22.8116		853.577	404.691	2.4802	3.10284	1.4206	0.0380203	0.269851	0.799331	-0.323135
7632			PS(19:1(9Z)/22:2(13Z,16Z))	-10.4312		854.583	404.668	0.705747	0.892664	1.43287	0.0353383	0.265461	0.790608	-0.338966
8944			CDP-DG(16:0/16:0)	23.0367		952.529	398.296	0.190041	0.149763	1.80421	0.00677479	0.174509	1.26895	0.343634
8870						945.566	398.144	0.169106	0.152113	1.50888	0.0207023	0.228357	1.11172	0.152789
5877			PG(13:0/20:1(11Z))	-4.71321		733.499	397.74	0.0279016	0.0517546	1.29899	0.00234055	0.149668	0.539114	-0.891339
8094			PI(16:1(9Z)/22:4(7Z,10Z,13Z,16Z))	6.59313		883.54	397.547	1.37865	1.27428	2.37427	0.00160611	0.145857	1.0819	0.113572
8106						884.543	397.547	0.632017	0.590885	1.99877	0.00789801	0.17838	1.06961	0.0970872
6899			PI(O-16:0/17:2(9Z,12Z))	1.33386		805.525	397.44	0.115396	0.100537	2.12095	0.000289727	0.132381	1.1478	0.198868
9566						1019.51	396.914	0.128981	0.0898905	1.52293	0.0284455	0.251457	1.43487	0.520922
8361			Avermectin A2a	6.69041		903.517	391.79	0.0297869	0.05015	1.56659	0.015915	0.20733	0.593957	-0.751571
5076						678.503	390.967	0.041771	0.026239	1.87288	0.044543	0.283531	1.59194	0.670789
1079						242.943	390.447	0.343998	0.272984	1.77926	0.0448565	0.284224	1.26014	0.333585
7413			Spiramycin	19.6597		839.544	389.745	0.0379082	0.0642542	1.75218	0.0327215	0.260669	0.589971	-0.761283
7140						821.588	389.464	0.0161486	0.00943456	2.10069	0.0233968	0.237591	1.71164	0.775379
5412			PC(O-16:0/15:1(9Z))	-1.98337		702.543	389.394	0.216645	0.284542	1.54304	0.0483677	0.291576	0.761382	-0.393307
5421			PE-Cer(d14:1(4E)/22:0(2OH))	9.45814		703.546	389.363	0.084041	0.11485	1.73168	0.0320342	0.259314	0.731744	-0.45059
3712						556.45	387.574	0.0329619	0.0114505	1.00031	0.047987	0.290813	2.87864	1.52539
5453						705.571	386.545	0.036484	0.0315013	1.72407	0.0275231	0.249198	1.15818	0.211854
2403						424.304	379.828	0.0419313	0.0517887	1.06597	0.0359287	0.266467	0.809661	-0.304609
1719						340.329	379.691	0.0523199	0.0668115	1.49456	0.0162837	0.2092	0.783097	-0.352737
2266						407.313	379.671	0.0400388	0.051466	1.7958	0.0252143	0.243034	0.777966	-0.36222
4676			PA(O-16:0/17:1(9Z))	-3.51249		645.484	378.159	0.0163262	0.00874215	1.86604	0.0298082	0.254605	1.86752	0.901127
8406			(3'-sulfo)Galbeta-Cer(d18:1/24:0(2OH))	-20.722		906.616	377.596	0.51583	0.427397	1.48499	0.0341362	0.263329	1.20691	0.27132
8418			PI(17:0/22:0)	-8.91117		907.62	377.593	0.265898	0.220625	1.47886	0.0424068	0.278634	1.20521	0.269281
12						100.738	377.425	0.0194522	0.014447	1.81943	0.0277971	0.249881	1.34646	0.429167
9162			MIPC(t18:0/16:0(2OH))	18.5877		974.6	377.296	0.0339926	0.0247949	1.74298	0.0255011	0.243843	1.37095	0.455179
4861			PA(12:0/21:0)	0.0146418		661.481	375.881	0.0393154	0.0645757	1.88336	0.0267055	0.247103	0.608826	-0.715898
4873			PC(17:0/10:0)	11.395		662.484	375.774	0.0126989	0.0222455	1.22351	0.0469414	0.288677	0.570851	-0.808814
3173						512.36	372.736	0.113364	0.0916592	1.86735	0.0427402	0.279419	1.2368	0.306609
5623			PS(17:0/14:1(9Z))	22.5962		718.483	371.668	0.0166436	0.0282472	1.59891	0.00737533	0.176704	0.589211	-0.763143
3996						583.362	371.543	0.013384	0.00147755	2.60418	0.00248924	0.15018	9.05825	3.17923
4291			PG(12:0/12:0)	15.5486		609.387	371.519	0.0622238	0.00687446	2.51715	0.0013461	0.143607	9.05146	3.17815
4280						608.383	371.51	0.187104	0.0196594	2.46319	0.00100488	0.139105	9.51727	3.25055
2825			PA(21:4(6Z,9Z,12Z,15Z)/0:0)	23.9678		471.263	370.505	0.0592842	0.0718314	1.65456	0.0235641	0.238116	0.825324	-0.276967
10328						1159.51	368.848	0.0204581	0.0264175	1.66832	0.0318471	0.258937	0.774413	-0.368825
8970						955.552	368.804	0.261422	0.343595	1.73304	0.0173991	0.214608	0.760845	-0.394326
9602						1023.54	368.804	0.0865654	0.11202	1.66248	0.0160541	0.208031	0.772764	-0.371899
8200			PI(16:0/22:1(11Z))	-21.1479		891.578	368.803	0.0193056	0.0315753	1.6537	0.0330146	0.261235	0.611416	-0.709774
10041						1092.53	368.803	0.0216063	0.0281205	1.54371	0.0368726	0.268024	0.768346	-0.380171
8991			PIM1(17:0/14:0)	2.01823		957.558	368.801	0.0390095	0.052292	1.78063	0.0189915	0.22162	0.745993	-0.422766
9608						1024.54	368.78	0.0446937	0.0594906	1.64167	0.0128147	0.198409	0.751273	-0.41259
8981						956.554	368.703	0.136346	0.17958	1.73925	0.0160079	0.207799	0.759247	-0.397359
8193			PS(22:2(13Z,16Z)/22:4(7Z,10Z,13Z,16Z))	-19.9936		890.574	368.679	0.199042	0.276472	1.80279	0.0191568	0.222305	0.719936	-0.47406
96						106.287	368.64	0.0016449	0.00292456	2.11268	0.02611	0.245518	0.562443	-0.83022
9551						1017.52	368.623	0.0140144	0.0199743	1.51812	0.03458	0.264129	0.701624	-0.51123
94						106.176	368.622	0.00771453	0.0116635	1.92716	0.0147972	0.203576	0.661428	-0.596345
9616						1025.55	368.616	0.00734416	0.013444	2.05279	0.00228311	0.149453	0.546277	-0.872295
881						221.894	368.522	0.00207387	0.00417468	1.60508	0.0323736	0.259989	0.496774	-1.00934
4673			SM(d18:1/12:0)	-0.19706		645.498	365.978	0.00612837	0.00978095	1.40223	0.0375939	0.269181	0.626562	-0.674471
2162						392.353	363.974	0.014283	0.00918564	2.2179	0.0361154	0.26678	1.55493	0.636852
6042			PS(O-16:0/18:2(9Z,12Z))	0.395962		744.519	361.299	0.0124095	0.00729257	2.26122	0.020182	0.226387	1.70166	0.766942
4064						588.897	361.177	0.0264317	0.0184417	1.74305	0.0299752	0.254976	1.43325	0.519295
3132						510.364	360.325	0.346651	0.299921	1.22532	0.0239079	0.23918	1.15581	0.208902
3553						538.382	360.013	0.0529298	0.0432338	2.22636	0.00142897	0.144405	1.22427	0.291921
2445						429.179	355.705	0.0737802	0.0563248	1.76617	0.00717019	0.17599	1.30991	0.389463
5127						682.498	354.483	0.0108737	0.00475032	2.23396	0.0293088	0.253476	2.28905	1.19475
92						106.063	350.505	0.0278456	0.0346633	1.05544	0.0395193	0.272235	0.803317	-0.315958
5031			PC(P-16:0/13:0)	-0.54595		674.513	342.844	0.00765909	0.012584	2.04653	0.00767945	0.177703	0.608636	-0.716349
8610			PI(19:0/22:6(4Z,7Z,10Z,13Z,16Z,19Z))	-5.43181		923.561	339.784	0.0627375	0.104029	1.11732	0.0408416	0.274841	0.603077	-0.729586
9752						1046.53	339.094	0.00772623	0.0117568	1.53154	0.0447588	0.284009	0.657174	-0.605653
8629						924.566	338.723	0.0172146	0.0307102	1.02198	0.0364139	0.267275	0.56055	-0.835084
7722			PS(20:1(11Z)/22:6(4Z,7Z,10Z,13Z,16Z,19Z))	-10.0759		860.536	337.117	0.150506	0.198835	1.57425	0.0142666	0.202309	0.756939	-0.401751
1889						364.33	329.345	0.0433883	0.057037	1.23132	0.0368347	0.267962	0.760705	-0.394592
6708			PS(O-16:0/22:6(4Z,7Z,10Z,13Z,16Z,19Z))	-2.00573		792.517	324.253	0.0281552	0.0194715	2.15971	0.0286389	0.251917	1.44597	0.532037
6731			PI(O-16:0/16:1(9Z))	-3.99859		793.52	323.949	0.0130372	0.00758858	2.68248	0.00780978	0.17811	1.718	0.78073
5215			PS(P-16:0/14:1(9Z))	-20.1139		688.442	322.491	0.00309193	0.00593704	1.12804	0.0323528	0.259948	0.520786	-0.941238
8694						930.53	321.849	0.0018903	0.0040578	1.79631	0.0085122	0.181599	0.465843	-1.10208
9885						1064.5	321.805	0.0193185	0.0287064	1.60587	0.00697403	0.175273	0.67297	-0.571385
63						103.061	321.767	0.00555036	0.00890026	1.4431	0.0116075	0.194691	0.623617	-0.681267
7771			PI(14:0/22:1(11Z))	-24.63		863.544	321.767	0.0154148	0.0235421	1.62627	0.0193455	0.223077	0.654774	-0.61093
7755			PS(20:2(11Z,14Z)/22:4(7Z,10Z,13Z,16Z))	-17.8895		862.545	321.764	0.125665	0.173239	1.66268	0.0204349	0.227353	0.725388	-0.463175
10655						1267.46	321.763	0.00422849	0.00784818	1.79711	0.00224131	0.14929	0.538786	-0.892215
10478						1199.47	321.751	0.013544	0.0202335	1.74995	0.00701744	0.175434	0.669384	-0.579094
8681			PI(20:4(5Z,8Z,11Z,14Z)/22:6(4Z,7Z,10Z,13Z,16Z,19Z))	7.43053		929.525	321.745	0.0233533	0.0337719	1.56565	0.0135365	0.200433	0.691502	-0.532195
838						214.886	321.74	0.00235489	0.00443649	1.68332	0.0196162	0.224169	0.530801	-0.913757
9299						989.493	321.74	0.0134764	0.0215499	1.67153	0.00258771	0.150489	0.625357	-0.677249
9370						995.507	321.733	0.0588617	0.0840228	1.72116	0.0137957	0.201118	0.700545	-0.513451
9833						1057.48	321.727	0.00799038	0.0137401	1.90431	0.00328539	0.152168	0.581536	-0.782061
10221						1131.48	321.725	0.0237177	0.0342835	1.51513	0.0120067	0.195982	0.691813	-0.531547
10483						1200.47	321.721	0.0054755	0.0080866	1.39536	0.0327343	0.260694	0.677108	-0.562543
10229			CoA(24:0(3OH))	23.1031		1132.48	321.692	0.0114253	0.0170019	1.36785	0.011431	0.194096	0.672003	-0.573461
10451						1193.45	321.692	0.00337645	0.00578396	1.97594	0.0133014	0.199794	0.583762	-0.776548
9382						996.51	321.69	0.0294062	0.044276	1.77445	0.00770424	0.177781	0.664157	-0.590404
9876						1063.49	321.69	0.0388797	0.0569512	1.51265	0.00988366	0.188184	0.682685	-0.550709
8660			PI(22:6(4Z,7Z,10Z,13Z,16Z,19Z)/20:5(5Z,8Z,11Z,14Z,17Z))	18.2891		927.52	321.626	0.178123	0.239843	1.81549	0.031988	0.259221	0.742662	-0.429222
10191						1125.47	321.541	0.00406194	0.00699178	1.70073	0.00888101	0.183521	0.58096	-0.78349
68						103.172	321.541	0.0016081	0.00276631	1.76011	0.0191322	0.222203	0.581315	-0.782607
9392						997.513	321.534	0.00665469	0.0107514	1.63574	0.00685092	0.174805	0.618957	-0.692088
8666						928.525	321.533	0.086078	0.120149	1.71653	0.0192369	0.222634	0.71643	-0.481102
8854						944.509	321.466	0.00276906	0.00581915	2.09215	0.00256755	0.150428	0.475853	-1.07141
9838						1058.48	321.431	0.00224069	0.00417555	1.38099	0.0276209	0.249443	0.536622	-0.898022
8541						917.492	321.42	0.00212164	0.00375696	2.00198	0.00513338	0.166601	0.564722	-0.824387
7714			PS(20:1(11Z)/22:6(4Z,7Z,10Z,13Z,16Z,19Z))	-9.76053		860.536	321.238	2.26072	3.0465	1.83574	0.0268437	0.247463	0.742072	-0.43037
2183						395.243	319.414	0.00933125	0.0120053	1.55673	0.0143859	0.202601	0.777259	-0.363533
8749			PI(20:1(11Z)/22:6(4Z,7Z,10Z,13Z,16Z,19Z))	-2.31183		935.563	319.266	0.00313644	0.0104506	2.00037	0.0154836	0.205107	0.300122	-1.73638
2194			Phytosphingosine 1-phosphate	-12.4969		396.247	319.123	0.000427518	0.000779823	1.21044	0.0446501	0.283769	0.548225	-0.86716
6376			PI(O-16:0/14:0)	-2.7587		767.506	318.777	0.0256112	0.0172857	2.29911	0.0116442	0.194812	1.48164	0.567198
6354			PS(O-16:0/20:5(5Z,8Z,11Z,14Z,17Z))	-1.90551		766.501	318.603	0.0592716	0.0416226	2.42115	0.0133619	0.19996	1.42403	0.509975
7836						868.538	314.846	0.04205	0.0673571	1.00509	0.0357839	0.266222	0.624285	-0.679724
7802			PI(P-16:0/22:6(4Z,7Z,10Z,13Z,16Z,19Z))	-2.85137		865.521	308.188	0.00431306	0.00830473	1.35009	0.0136978	0.200862	0.51935	-0.945222
9709						1038.48	307.675	0.00249162	0.00477026	1.58071	0.0452986	0.285191	0.522323	-0.936986
5024						674.324	302.091	0.00565228	0.0103046	1.59052	0.0197278	0.224613	0.548519	-0.866388
4600						637.432	300.933	0.0270277	0.0381203	1.32456	0.0249616	0.242311	0.709011	-0.49612
4767			PE(12:0/18:4(6Z,9Z,12Z,15Z))	10.1777		654.421	300.512	0.0155966	0.0237808	1.45342	0.0255235	0.243905	0.65585	-0.608563
8731			PI(20:2(11Z,14Z)/22:6(4Z,7Z,10Z,13Z,16Z,19Z))	-1.23567		933.549	297.966	0.0108102	0.0262619	1.95697	0.022317	0.234073	0.411633	-1.28057
8741						934.551	297.849	0.00479958	0.0128046	1.86104	0.0292872	0.253427	0.374833	-1.41568
8436						908.535	296.621	0.0600033	0.0850716	1.48017	0.0338991	0.262895	0.705327	-0.503635
5951			PS(P-16:0/18:4(6Z,9Z,12Z,15Z))	-0.542409		738.471	296.196	0.0107389	0.00502163	1.47673	0.0496956	0.294173	2.13852	1.09661
9209						980.601	294.793	0.00540175	0.00780209	1.44456	0.0378525	0.269589	0.692346	-0.530434
9203						979.597	294.708	0.0216301	0.0285552	1.32593	0.030818	0.256804	0.757483	-0.400716
9196						978.595	294.674	0.0384787	0.0493367	1.35313	0.0489218	0.292671	0.77992	-0.358602
7265			PC(18:1(11Z)/22:6(4Z,7Z,10Z,13Z,16Z,19Z))	-22.2397		830.552	289.728	0.0243214	0.0124882	1.37902	0.0296006	0.254139	1.94756	0.961667
9181			CDP-DG(16:0/18:2(9Z,12Z))	15.9004		976.523	284.063	0.00232907	0.00579157	1.56378	0.0240917	0.23974	0.402148	-1.3142
9737						1043.51	284.04	0.000600615	0.00268757	2.07127	0.0175804	0.215446	0.223479	-2.16179
9171						975.521	283.966	0.00532571	0.0121216	1.63413	0.0182198	0.218319	0.439359	-1.18653
8433						908.535	283.769	0.10956	0.204107	1.94697	0.0109582	0.19243	0.536776	-0.897609
8446			PI(18:0/22:6(4Z,7Z,10Z,13Z,16Z,19Z))	-9.65069		909.541	283.731	0.0344681	0.061383	1.82929	0.018652	0.220189	0.561524	-0.832579
8188						890.544	283.703	0.00867284	0.00352188	1.6102	0.0490944	0.293009	2.46256	1.30016
8711			PI(20:3(8Z,11Z,14Z)/22:6(4Z,7Z,10Z,13Z,16Z,19Z))	-2.4697		931.532	282.587	0.0139037	0.021081	1.39018	0.0320101	0.259265	0.659535	-0.600479
8719						932.536	282.576	0.0069286	0.0116081	1.31552	0.0150335	0.204116	0.596876	-0.744497
2443						429.18	275.745	0.0249854	0.0193016	1.48434	0.031875	0.258993	1.29447	0.372363
3713						556.269	274.728	0.0131238	0.00918793	1.79613	0.0468487	0.288485	1.42838	0.514375
4973			Monensin A	20.3219		669.436	270.637	0.0298788	0.0473218	1.05305	0.0181129	0.217847	0.631397	-0.663382
4842			Neurosporaxanthin beta-D-glucopyranoside	19.7165		659.408	270.474	0.00611318	0.0119756	1.30916	0.00507504	0.166262	0.510471	-0.970099
4997						671.444	270.464	0.00142671	0.00315351	1.05956	0.0100494	0.188885	0.452419	-1.14427
5193			PG(12:0/18:3(6Z,9Z,12Z))	10.3726		687.431	270.406	0.0190128	0.0317409	1.04985	0.015452	0.205039	0.598999	-0.739374
5214			PS(12:0/17:2(9Z,12Z))	19.5164		688.433	270.385	0.00265547	0.00633868	1.20736	0.00419671	0.160267	0.418931	-1.25522
4864			PG(14:1(9Z)/14:1(9Z))	-2.84323		661.407	270.38	0.00105098	0.00236438	1.21157	0.0355353	0.265799	0.444506	-1.16973
5176			Oleandomycin	23.2517		686.428	270.336	0.0473178	0.0752628	1.13635	0.0196314	0.224229	0.628702	-0.669553
6591			Ustilagic acid	15.9812		783.415	270.319	0.00343063	0.00708457	1.08375	0.0288452	0.252403	0.48424	-1.04621
4851						660.411	270.12	0.00155675	0.00468222	1.38924	0.00348366	0.153711	0.332481	-1.58866
8720						932.536	269.966	0.00571454	0.019363	2.10696	0.00813357	0.179493	0.295126	-1.7606
7340			PS(18:0/22:6(4Z,7Z,10Z,13Z,16Z,19Z))	24.5001		834.549	269.964	0.0841958	0.0383162	1.73076	0.031965	0.259175	2.1974	1.1358
8705			PI(20:3(8Z,11Z,14Z)/22:6(4Z,7Z,10Z,13Z,16Z,19Z))	-2.75709		931.532	269.959	0.0127619	0.0305085	1.60931	0.0255721	0.244041	0.418308	-1.25736
8078			PS(22:4(7Z,10Z,13Z,16Z)/22:6(4Z,7Z,10Z,13Z,16Z,19Z))	-10.564		882.52	269.065	0.385659	0.608212	1.93274	0.0212012	0.230185	0.634086	-0.65725
11						100.616	260.668	0.010551	0.0200888	1.67895	0.0380267	0.269861	0.525219	-0.929008
16						100.728	260.617	0.00470423	0.00980416	1.49574	0.0388338	0.271097	0.47982	-1.05943
8407						906.519	260.55	0.127979	0.217432	1.63994	0.0489007	0.29263	0.58859	-0.764665
9154						973.505	260.512	0.00604897	0.0133744	1.65097	0.0359644	0.266527	0.452279	-1.14472
9164						974.508	260.421	0.00253422	0.00619849	1.79684	0.04354	0.281271	0.408845	-1.29037
5908			PA(O-20:0/20:5(5Z,8Z,11Z,14Z,17Z))	-6.14304		735.529	251.277	0.00198079	0.00404216	2.12423	0.0105799	0.191012	0.490032	-1.02905
8696						930.521	248.31	0.0287324	0.0517201	1.56687	0.0126324	0.197873	0.555535	-0.84805
8706			PI(20:3(8Z,11Z,14Z)/22:6(4Z,7Z,10Z,13Z,16Z,19Z))	-10.8363		931.524	248.3	0.0082965	0.0159565	1.51395	0.0160133	0.207826	0.519945	-0.943569
69						103.283	248.25	0.00110103	0.00312031	1.90407	0.013296	0.199779	0.35286	-1.50283
8686			PI(20:4(5Z,8Z,11Z,14Z)/22:6(4Z,7Z,10Z,13Z,16Z,19Z))	0.469949		929.519	248.159	0.0506556	0.0947615	1.87994	0.00744712	0.176946	0.534559	-0.903579
2731						459.326	243.575	0.00483083	0.0258072	1.6445	0.0455091	0.285647	0.18719	-2.41743
5527			PG(12:0/20:5(5Z,8Z,11Z,14Z,17Z))	8.54496		711.43	241.255	0.00102526	0.00358453	2.05631	0.00544301	0.168296	0.286025	-1.80579
5510			Lipid X	3.39934		710.427	241.083	0.00463311	0.0112353	1.23741	0.00607034	0.171472	0.412372	-1.27798
3661						551.363	240.899	0.00513309	0.00403257	1.56739	0.0362979	0.267083	1.27291	0.348126
5284			methyl 13-sophorosyloxydocosanoate	-9.60198		693.436	240.898	0.00120601	0.00362284	1.74439	0.0118337	0.195431	0.332892	-1.58688
5180						686.446	240.465	0.00559762	0.0029773	1.59786	0.0337041	0.262535	1.8801	0.910807
5057			PG(12:0/17:1(9Z))	-10.888		677.433	224.82	0.00892799	0.0129628	1.74527	0.00114801	0.141283	0.688737	-0.537975
5070			PS(14:0/14:0)	1.49358		678.436	224.596	0.00337882	0.00511366	1.32321	0.00624409	0.172274	0.660744	-0.597837
3494			PC(O-16:0/3:1(2E))	-2.18898		534.355	220.341	0.0181098	0.0108571	2.22969	0.0402868	0.2735	1.66802	0.738132
3593			11alpha-Hemiglutaryloxy-1,25-dihydroxyvitamin D3	6.14869		543.372	197.212	0.00118923	0.000554849	1.65585	0.0419774	0.277611	2.14335	1.09987
3648			PC(16:0/3:0)	-0.25283		550.351	191.789	0.0289633	0.0183168	2.03112	0.0440933	0.282526	1.58124	0.661058
2357						418.226	184.395	0.00535228	0.00304928	2.06794	0.02301	0.236357	1.75526	0.811685
3231						519.391	184.225	0.376311	0.315078	2.26315	0.0238535	0.239013	1.19434	0.256214
5748						725.145	184.062	0.0153331	0.0120983	1.74224	0.0378767	0.269626	1.26737	0.341839
6223			GlcCer(d18:0/20:0)	10.4917		756.644	184.013	0.0116249	0.0077805	2.01093	0.00762986	0.177545	1.49411	0.579286
5136						683.156	183.925	0.0185733	0.0138995	1.63667	0.0239527	0.239317	1.33625	0.418195
4328						612.546	183.911	0.0440537	0.0318342	2.1382	0.0156841	0.206149	1.38385	0.468686
3674						553.197	183.898	0.0184781	0.0134056	1.86154	0.0287167	0.252101	1.37838	0.462978
1237						282.251	183.88	0.809009	0.575469	2.2134	0.00852748	0.181682	1.40583	0.491418
4285			Orobol 6,8-di-C-glucoside	8.93939		609.152	183.877	0.00592347	0.00381857	1.40724	0.0117891	0.195287	1.55123	0.633409
6140						751.144	183.873	0.0139356	0.0107151	1.77985	0.0303474	0.255793	1.30055	0.379127
1243			Linoleic acid(d4)	-10.5521		283.255	183.869	0.056174	0.0404551	1.84195	0.0164265	0.209917	1.38855	0.47358
5223						689.173	183.869	0.0120133	0.00852393	1.88655	0.018605	0.219988	1.40936	0.495045
4343						613.549	183.867	0.00782636	0.00501525	1.7615	0.0180243	0.217454	1.56051	0.64202
4459			Cladrin 7-O-laminaribioside	5.61726		621.186	183.867	0.0160688	0.0118679	1.51798	0.0315974	0.258429	1.35398	0.437202
1637			4,8 dimethylnonanoyl carnitine	24.7655		328.257	183.865	0.0148859	0.010321	2.0869	0.0121757	0.196509	1.44229	0.528357
4031						586.489	183.864	0.0111828	0.00558977	1.58223	0.007018	0.175436	2.00059	1.00043
2927						485.211	183.863	0.0199912	0.0144902	1.60644	0.0328259	0.260872	1.37964	0.46429
1768			9-deoxy-9-methylene-PGE2	-8.85093		349.235	183.86	0.293996	0.206389	2.06343	0.0165661	0.210612	1.42447	0.510428
1771			Capnine	4.81374		350.239	183.86	0.0610704	0.0416027	2.15667	0.00783015	0.178173	1.46794	0.553795
3779			FAHFA(18:1(9Z)/5-O-18:0)	-1.73353		563.504	183.86	0.026003	0.0152624	1.34589	0.013809	0.201153	1.70373	0.768698
4320						611.543	183.86	0.106716	0.0744816	2.19011	0.00450647	0.162595	1.43279	0.518824
6212						755.64	183.86	0.0231442	0.0167854	1.94876	0.0114507	0.194163	1.37883	0.463447
3623			Ambofuracin	-1.04982		547.182	183.829	0.0343208	0.0265534	1.80773	0.0311857	0.257578	1.29252	0.37019
2897			Acevaltrate	3.68514		479.194	183.803	0.0330152	0.0262891	1.97048	0.0453273	0.285253	1.25585	0.328662
7593						851.417	183.803	0.0043275	0.00215181	1.85423	0.0496909	0.294164	2.0111	1.00798
4016						585.486	183.801	0.0315598	0.0179227	1.97073	0.00678281	0.17454	1.76088	0.816298
4362						615.168	183.801	0.0380379	0.0286795	2.01035	0.0118217	0.195392	1.32631	0.407416
3791			Cer(d15:2(4E,6E)/20:0(2OH))	13.2886		564.507	183.798	0.00931972	0.00428921	1.90642	0.00324133	0.152082	2.17283	1.11958
2350						417.224	183.735	0.0334724	0.0210829	2.18277	0.00555885	0.16889	1.58765	0.666896
5233			PE-Cer(d15:1(4E)/20:0(2OH))	-3.4485		689.522	183.661	0.00272952	0.00133126	1.95623	0.0184472	0.21931	2.05032	1.03585
3482						533.351	183.599	0.0193969	0.0146279	2.30448	0.0191156	0.222135	1.32602	0.407103
1943						368.232	183.566	0.00483008	0.00270715	2.3566	0.0154464	0.205027	1.78419	0.835272
4051			bacteriohopane-32,33, 34-triol-35-carbamate	-13.2814		588.455	183.529	0.00814031	0.00533294	1.95784	0.00978554	0.18776	1.52642	0.610153
2608			PA(P-20:0/0:0)	-21.6299		449.294	183.464	0.112359	0.0922471	2.34944	0.0146567	0.203248	1.21802	0.284544
1921						366.225	183.303	0.347784	0.246847	2.40513	0.00851532	0.181616	1.4089	0.494573
4045						587.453	183.214	0.0228496	0.0160969	1.87815	0.0109404	0.192365	1.4195	0.505387
2192			PC(9:0/0:0)	5.94779		396.218	177.882	0.0140558	0.00648064	1.64367	0.0272754	0.248573	2.1689	1.11696
4604						637.468	175.663	0.00293497	0.00173057	1.43553	0.0271928	0.248362	1.69596	0.762101
2744			Hydrocortisone succinate	8.86342		461.222	175.596	0.0170087	0.0120837	1.24674	0.0152187	0.20453	1.40757	0.493209
3430						529.209	175.564	0.00413361	0.00212187	1.29769	0.00370876	0.15599	1.94809	0.962064
2340						416.241	175.538	0.056298	0.0397683	1.67683	0.0212575	0.230388	1.41565	0.501464
2031			9-deoxy-9-methylene-16,16-dimethyl -PGE2	0.105214		377.27	175.33	0.0119667	0.00821665	1.09308	0.0475278	0.289883	1.45639	0.542401
1656			DHA (d5)	11.0547		332.268	175.275	0.812919	0.580537	1.42749	0.00850529	0.181562	1.40029	0.485724
1674						334.274	175.195	0.00427015	0.00225127	1.14778	0.0205721	0.227871	1.89677	0.923545
3506			Aldosterone 18-glucuronide	13.3117		535.226	175.175	0.0039985	0.00184047	1.40533	0.00682365	0.174699	2.17254	1.11938
2212			Ophiobolin A	-7.62452		399.251	174.882	0.135637	0.0939998	1.21971	0.0154105	0.204949	1.44295	0.529021
4261						606.144	173.894	0.00150495	0.000834577	1.199	0.00735484	0.176634	1.80325	0.850602
2045						378.918	173.399	0.156899	0.143826	1.58404	0.0263191	0.24608	1.09089	0.125506
1440						308.915	173.023	0.0120907	0.01007	1.17786	0.0384743	0.270552	1.20066	0.263831
3898			PS(22:1(11Z)/0:0)	1.91299		578.347	172.198	0.0227285	0.0438696	1.84542	0.032003	0.259251	0.518093	-0.948717
5499						709.45	163.746	0.0104374	0.0163843	1.12727	0.00647694	0.173293	0.637035	-0.650556
5479			Fasciculic acid C	16.2356		708.444	163.605	0.0330839	0.0485359	1.12455	0.00526309	0.167331	0.681638	-0.552923
4452						620.394	163.319	0.0540051	0.0764753	1.04784	0.00540597	0.168102	0.706177	-0.501899
4268						607.412	162.471	0.0242721	0.0432475	1.58633	0.00214141	0.148877	0.561238	-0.833316
4256			PA(12:0/17:0)	-23.0361		605.405	162.378	0.331128	0.526735	1.76654	0.00634088	0.172705	0.628643	-0.669688
4264			PE(12:0/14:0)	-8.12056		606.409	162.297	0.125251	0.209155	1.88747	0.00280303	0.151092	0.598842	-0.739753
5014						673.393	162.231	0.0125843	0.0224518	1.57076	0.00596709	0.170977	0.560504	-0.835205
2962			Ximaosteroid D	-18.9499		489.277	156.895	0.0295161	0.0516487	1.56678	0.00531501	0.167615	0.571477	-0.807233
4282						608.389	152.049	0.0283159	0.0400595	1.3966	0.0226148	0.235066	0.706845	-0.500535
1262						285.258	147.565	0.00540485	0.00264231	1.20586	0.0154406	0.205014	2.0455	1.03246
2730						459.206	147.477	0.0177587	0.0115301	1.09838	0.0281742	0.250804	1.54021	0.623128
2207						398.239	146.924	0.0237077	0.0144229	1.22898	0.0221803	0.233611	1.64375	0.716992
2201						397.235	146.778	0.107064	0.0717572	1.35695	0.0379039	0.269669	1.49203	0.577272
2326						414.225	146.692	0.0761287	0.046815	1.5611	0.0322806	0.259805	1.62616	0.701468
2573						446.17	139.972	0.0287025	0.0207865	1.55817	0.0227185	0.235408	1.38082	0.46553
4325						612.366	138.702	0.0136782	0.0304675	1.0397	0.00814033	0.179531	0.448943	-1.1554
5165			PG(12:0/18:4(6Z,9Z,12Z,15Z))	3.81766		685.411	137.448	0.00225018	0.00450873	1.08571	0.0177738	0.216329	0.499073	-1.00268
5149						684.408	136.489	0.0116519	0.0259512	1.9029	0.00152097	0.145198	0.448994	-1.15523
4678						646.333	136.347	0.00607256	0.0124894	1.80573	0.000925717	0.137649	0.486219	-1.04032
4309			4-Oxomytiloxanthin	1.69437		611.375	136.268	0.0151977	0.0082608	1.96736	0.0462702	0.287273	1.83973	0.879497
1898						365.164	131.201	0.17785	0.139139	1.81518	0.0420228	0.27772	1.27822	0.354139
2966			Ximaosteroid D	-19.2314		489.276	130.764	0.0527315	0.108633	1.78943	0.00535202	0.167815	0.485409	-1.04273
2213						399.22	130.455	0.0583454	0.0433272	1.55841	0.0269518	0.247743	1.34662	0.429344
2122			(3S,5R,6S,7E,9x)-7-Megastigmene-3,6,9-triol 9-glucoside	-10.8929		389.214	130.38	0.400557	0.303391	1.5011	0.0306461	0.256437	1.32027	0.40083
4566						633.528	130.38	0.146968	0.121662	1.42057	0.0357729	0.266204	1.20801	0.272627
1864						361.191	130.336	0.110792	0.0843903	1.5879	0.0342515	0.263539	1.31285	0.392707
603						172.958	130.326	0.212447	0.182361	2.01688	0.0476083	0.290047	1.16498	0.220302
1415			R-Dysidazirine	-7.32886		306.242	130.32	0.143846	0.110006	1.51624	0.0394799	0.272169	1.30763	0.386949
2506						439.207	130.316	0.243646	0.190256	1.54562	0.0385217	0.270624	1.28062	0.356845
3091			gibberellin A3 O-beta-D-glucoside	14.1991		507.194	130.313	0.106603	0.0851937	1.63354	0.0467185	0.288214	1.2513	0.323432
4283						608.475	130.313	0.311023	0.211784	1.42955	0.0333246	0.261824	1.46858	0.554424
4530			PA(P-16:0/16:1(9Z))	-1.99155		629.454	130.313	0.564209	0.38612	1.57018	0.0219252	0.232738	1.46123	0.547179
4542						630.458	130.311	0.247835	0.169798	1.53451	0.0238444	0.238985	1.45959	0.545566
1389						304.236	130.306	18.4401	14.1874	1.58912	0.0369508	0.26815	1.29975	0.378238
1966						372.223	130.306	0.601802	0.456269	1.63162	0.0309241	0.257028	1.31896	0.399405
4269						607.473	130.306	0.690618	0.476017	1.43635	0.0359682	0.266533	1.45082	0.536873
1974						373.226	130.304	0.0711659	0.0529622	1.51987	0.0294788	0.253864	1.34371	0.426223
3875			Formononetin 7-O-rutinoside	8.41502		575.182	130.304	0.0644284	0.0476013	1.49979	0.00920705	0.185122	1.3535	0.436694
1965						371.219	130.299	2.51352	1.92225	1.45574	0.0445044	0.283445	1.30759	0.386915
5331						697.441	130.119	0.0809918	0.0518711	1.22759	0.0169244	0.21236	1.56141	0.642845
3186						514.385	129.753	0.105226	0.061087	1.2681	0.0281743	0.250804	1.72255	0.784548
2414						425.29	128.714	0.0596209	0.0821553	1.39564	0.0256767	0.244331	0.725709	-0.462536
2336						415.262	127.37	0.0559078	0.0836591	1.59209	0.00894579	0.183846	0.668281	-0.581474
2343			Sphingofungin E	0.214248		416.266	126.77	0.00565749	0.0122481	1.92898	0.0060883	0.171557	0.461908	-1.11432
2356						417.258	125.974	0.0029545	0.00740107	1.3836	0.0133867	0.200028	0.399199	-1.32482
4242			PA(12:0/17:1(9Z))	-21.9966		603.39	124.237	0.00145839	0.00313242	1.45979	0.0370694	0.268341	0.465578	-1.10291
5124						682.299	123.425	0.0139563	0.0255698	1.90682	0.000705207	0.136739	0.545813	-0.873521
5112						681.295	123.296	0.0431858	0.0736	1.96721	0.000473545	0.134906	0.586764	-0.769147
5138			Evasterioside B	-10.0571		683.301	123.061	0.0010965	0.00334215	2.07149	0.000381848	0.133597	0.328083	-1.60787
3737						558.32	120.658	0.00510682	0.00277866	1.17416	0.0356034	0.265916	1.83787	0.878038
4750			PA(13:0/20:4(5Z,8Z,11Z,14Z))	-20.1713		653.406	117.21	0.0120702	0.0173718	1.54956	0.0209941	0.229433	0.694815	-0.525299
2960			Ximaosteroid D	-19.4406		489.276	116.362	0.039558	0.074926	1.56449	0.00253526	0.150327	0.527961	-0.921496
4500			PA(13:0/18:4(6Z,9Z,12Z,15Z))	6.53118		625.392	115.214	0.00432395	0.00828189	1.33245	0.0364715	0.26737	0.522097	-0.937609
5096			PE(12:0/20:5(5Z,8Z,11Z,14Z,17Z))	-22.7826		680.414	113.607	0.117211	0.16315	1.0834	0.0030784	0.151746	0.718428	-0.477084
2545						443.301	112.918	0.0334757	0.0243243	2.03426	0.0488822	0.292593	1.37623	0.460718
5119						681.416	112.845	0.0391589	0.0590283	1.31261	0.000869026	0.137458	0.663393	-0.592064
1208						278.22	112.834	0.0369066	0.0281966	1.90623	0.0413125	0.276001	1.3089	0.388357
3981						582.319	108.875	0.00404757	0.00225009	1.96587	0.0100462	0.188872	1.79884	0.847071
3508						535.324	107.542	0.0472394	0.0735357	1.26281	0.000330717	0.133003	0.642401	-0.638454
3677						553.333	106.121	0.00226626	0.00496426	1.42849	0.000377352	0.133551	0.456516	-1.13126
3665			PS(20:0/0:0)	0.580296		552.331	105.665	0.0201137	0.0327391	1.21419	0.000618264	0.136207	0.614363	-0.702836
2281			Minabeolide-4	-9.85566		409.271	103.419	0.00843683	0.00456276	1.9312	0.0282124	0.250896	1.84906	0.886795
3093						507.292	100.401	0.0647198	0.042639	2.60773	0.000492648	0.13512	1.51785	0.602033
3087			FR901464	24.3247		506.288	100.272	0.248489	0.171272	2.47971	0.00108379	0.140369	1.45084	0.536886
2372			CPA(18:0)	-2.2217		419.256	99.045	0.146749	0.116734	1.50445	0.0478414	0.290519	1.25712	0.33012
3728			PI(O-16:0/0:0)	-5.5893		557.307	97.8294	0.0733177	0.0435273	2.86547	1.17712e-05	0.0700125	1.68441	0.752242
3707			PC(6:2(3E,5E)/14:2(11E,13E))	-0.900035		556.304	97.5354	0.24721	0.159127	2.60052	0.000171552	0.129028	1.55354	0.635555
3739						558.31	97.5346	0.00787444	0.00343827	2.68855	0.000135084	0.1269	2.29023	1.1955
2734			(6R)-vitamin D2 6,19-sulfur dioxide adduct / (6R)-ergocalciferol 6,19-sulfur dioxide adduct	-0.893111		459.293	96.5422	0.0943272	0.000667437	2.10973	0.0425303	0.278926	141.327	7.1429
3682						554.288	84.813	0.19027	0.115673	2.25006	0.00224942	0.149322	1.64489	0.717993
1759						347.258	81.6035	0.104745	0.0646694	2.1054	0.0148705	0.203745	1.6197	0.695724
3070						504.273	81.3415	0.0717507	0.0525714	1.89251	0.0148743	0.203754	1.36482	0.448715
1679						335.259	81.1159	0.00304871	0.00157437	2.07551	0.0131507	0.199374	1.93646	0.953424
3080			(3b,9R)-5-Megastigmene-3,9-diol 9-[apiosyl-(1->6)-glucoside]	21.8623		505.276	81.1144	0.0177287	0.0120628	1.70553	0.0134615	0.200231	1.4697	0.555519
1200						276.16	79.3933	0.0312178	0.0394743	1.3062	0.0212995	0.230539	0.790838	-0.338545
4900						664.247	78.647	0.00515854	0.00261093	1.96532	0.00454597	0.162874	1.97575	0.9824
904			Alepric acid	-2.25357		223.17	78.5754	0.0129057	0.0325983	1.5245	0.0354578	0.265666	0.3959	-1.33679
4374						616.326	78.4005	0.1318	0.0844061	2.75416	4.33757e-05	0.109022	1.56149	0.642927
4385						617.329	78.3244	0.0418387	0.0259334	2.63033	0.000125021	0.126113	1.61331	0.690028
3422			glycochenodeoxycholic acid 7-sulfate	18.2657		528.273	78.2721	1.42253	0.996418	2.41084	0.000638578	0.136343	1.42764	0.513633
4137						596.26	78.2558	0.0525733	0.0358873	2.4242	0.000370147	0.133475	1.46496	0.550856
3433			Proscillaridin A	-7.68658		529.277	78.2131	0.413872	0.292961	2.3743	0.000671324	0.136547	1.41272	0.498476
3664						552.273	74.9232	0.461821	0.350385	2.06684	0.0126741	0.197994	1.31804	0.398391
4450						620.259	74.7959	0.0123144	0.0076242	2.04931	0.00319505	0.15199	1.61517	0.691687
3675			SQMG(16:1(9Z)/0:0)	14.0307		553.277	74.743	0.135806	0.104811	2.01946	0.0148088	0.203603	1.29572	0.373759
1750						346.246	72.5749	0.0334346	0.0189613	1.97592	0.0105765	0.191	1.76331	0.818286
1747			1alpha,22-dihydroxy-23,24,25,26,27-pentanorvitamin D3 / 1alpha,22-dihydroxy-23,24,25,26,27-pentanorcholecalciferol	-0.766496		345.243	72.0207	0.159768	0.0956027	1.87729	0.00822787	0.180031	1.67116	0.740853
1094			16:4(4Z,7Z,10Z,13Z)	-2.15007		247.17	71.1086	0.0189032	0.0232873	1.37022	0.0298811	0.254767	0.811738	-0.300914
1426						307.227	67.801	0.0286192	0.0199534	1.66323	0.0303555	0.25581	1.4343	0.520349
1085			alpha-hydroxy myristic acid	-2.19243		243.196	65.7174	0.02315	0.0328558	1.26482	0.0251041	0.24272	0.704596	-0.505131
1173						267.196	64.1099	0.00961219	0.0305644	1.84617	0.00620753	0.172109	0.314489	-1.66892
2827						471.877	58.207	0.00335681	0.000974492	2.4449	0.0105093	0.190739	3.44468	1.78437
2797						469.879	58.1223	0.00705739	0.00275908	2.25383	0.00505316	0.166134	2.55788	1.35495
2493			7-O-Methyllicoricidin	13.8066		437.239	51.9841	0.0590588	0.0928566	1.85951	0.00636332	0.172803	0.636022	-0.652852
2430			1(3)-glyceryl-PGF2alpha	12.5797		427.276	51.808	0.00524126	0.00234213	1.19221	0.0236458	0.238371	2.23782	1.16209
2417						426.273	51.5263	0.0690549	0.0427996	1.39582	0.0178365	0.216612	1.61345	0.690146
2465			Lithocholic acid glycine conjugate	16.6434		432.319	51.2658	0.0166719	0.00969011	1.24954	0.0258639	0.244847	1.7205	0.782832
2463						431.317	51.0829	0.0627312	0.0395587	1.70292	0.0286929	0.252045	1.58577	0.665188
2565			Pinnasterol	-1.95092		445.295	50.8356	0.0345404	0.0245062	1.01982	0.0361943	0.266911	1.40946	0.495139
852			alpha-hydroxy lauric acid	-2.21212		215.165	50.7983	0.0281705	0.0524634	1.91051	0.00277987	0.151031	0.536954	-0.897128
3002						495.332	50.1457	0.0145702	0.0079383	1.33991	0.0347362	0.264407	1.83544	0.876122
2756			ponasterone A	-1.79491		463.306	50.0787	0.00960856	0.0041211	1.73498	0.00691753	0.17506	2.33155	1.22129
1391						304.212	49.4104	0.00792659	0.0116716	1.29654	0.00677856	0.174523	0.679137	-0.558225
1187			Heptanoylcarnitine	-0.908878		272.186	49.2717	0.00710853	0.0131203	1.59735	0.00134148	0.14356	0.541795	-0.88418
323						138.019	48.7714	0.172462	0.154934	1.9599	0.0385342	0.270643	1.11313	0.154624
2155						392.215	48.694	0.0143145	0.00818756	2.41635	0.019809	0.224934	1.74832	0.80597
3638						548.263	48.0467	0.0167711	0.0110118	1.84803	0.0486512	0.292138	1.52301	0.606926
1643						329.175	47.8865	0.302285	0.193057	1.61552	0.0256686	0.244309	1.56578	0.646882
2830						472.218	47.8466	0.0126705	0.00566438	1.93077	0.0103804	0.190233	2.23687	1.16148
2058						380.158	47.8093	0.0322126	0.0434337	1.71077	0.00269902	0.150812	0.74165	-0.43119
2200						397.205	47.708	0.057622	0.0372726	1.80411	0.0157753	0.206618	1.54596	0.628504
2260			phorbol 13-acetate	-1.58937		405.191	47.6631	1.00516	0.674618	1.44951	0.0352278	0.265269	1.48996	0.575277
2262						406.195	47.6355	0.237236	0.157487	1.4374	0.0331099	0.261417	1.50639	0.591093
1649						330.178	47.6021	0.0659956	0.0431605	1.46311	0.0390126	0.271385	1.52907	0.612657
2394			Lespedeol A	8.93871		423.185	47.5366	0.243577	0.168658	1.64461	0.0298914	0.25479	1.4442	0.530273
2389						422.182	47.4334	1.06065	0.692628	1.70174	0.0123379	0.197003	1.53134	0.614793
770			Acetyl-D-carnitine	3.23559		202.109	47.3779	0.00219321	0.00315715	1.54456	0.0437967	0.281855	0.694681	-0.525576
3313						520.91	47.3079	0.0274332	0.0330275	1.90858	0.0457122	0.286084	0.830618	-0.267743
2401						424.187	47.2863	0.0307675	0.0206474	1.47379	0.0414726	0.276392	1.49014	0.575445
2739			Sulfamisterin	-2.14937		460.198	47.281	0.0202378	0.0123879	1.20966	0.0153548	0.204828	1.63368	0.708125
2833						473.178	47.2649	0.00324347	0.00154719	1.50028	0.00957471	0.186827	2.09636	1.06789
3772						562.898	47.1861	0.00814216	0.0139686	2.54563	0.00136637	0.14381	0.582889	-0.778708
2206						398.163	47.1793	0.0121856	0.00729071	1.95842	0.00877091	0.18296	1.67139	0.741046
1073						242.176	47.098	0.152856	0.224233	1.30499	0.00132745	0.143415	0.681684	-0.552824
1427			Isocordoin	21.4609		307.141	47.0789	0.136874	0.0966425	1.5832	0.0239915	0.239435	1.4163	0.502124
1435						308.144	46.9976	0.0178535	0.012406	1.40211	0.025626	0.244191	1.4391	0.52517
3786						564.257	46.7321	0.0119404	0.00435355	1.36974	0.0389505	0.271285	2.74268	1.45558
2818			PA(21:4(6Z,9Z,12Z,15Z)/0:0)	14.9949		471.259	46.4027	0.0209964	0.0109261	1.93399	0.00496347	0.165597	1.92167	0.942363
358						145.061	44.7461	0.0224397	0.0189068	1.11364	0.0139725	0.201573	1.18686	0.247151
140						111.02	44.7345	0.456788	0.341922	1.81177	0.0262475	0.245888	1.33594	0.417855
307						135.031	44.6788	0.569947	0.463119	1.95102	0.0290289	0.252831	1.23067	0.299446
640						180.06	44.5687	0.0168768	0.00934008	1.69113	0.0262182	0.245809	1.80692	0.853535
868						220.009	44.5684	0.0639946	0.0512682	1.68032	0.0300854	0.255219	1.24823	0.319887
639						179.056	44.3972	0.348262	0.234155	1.57063	0.0235661	0.238123	1.48731	0.57271
4						100.004	43.1782	0.00569574	0.00460077	1.68417	0.0320337	0.259313	1.238	0.30801
765						200.046	42.5208	0.0223395	0.0147711	1.48642	0.0177348	0.216152	1.51238	0.596825
2491						436.879	2.53572	0.00579322	0.00441896	1.57443	0.0117548	0.195175	1.31099	0.390658
