# Supplementary material for: A comparative lipidomic study of the human placenta from women with or without gestational diabetes mellitus
Source: Royal Society of Chemistry journal article supplement (doi:10.1039/d2mo00083k), 2022-04-23
Supplement: d2mo00083k5.xlsx [file d2mo00083k5.xlsx]

## Sheet: Sheet1
Header	Description
id	The unique data number of the substance in this qualitative analysis
MS2 name	The substance name obtained by qualitative matching analysis of secondary mass spectrometry
MS2 score	The score of the second-level match is [0, 1], the larger the better
mzmed	Material characteristics Mass charge ratio of ions
rtmed	Chromatographic retention time of the substance
id	MS2 name	MS2 score	mzmed	rtmed	GDM1	GDM2	GDM3	GDM4	GDM5	GDM6	GDM7	GDM8	GDM9	GDM10	GDM11	GDM12	GDM13	GDM14	GDM15	GDM16	GDM17	GDM18	GDM19	GDM20	Mean GDM	NC1	NC2	NC3	NC4	NC5	NC6	NC7	NC8	NC9	NC10	NC11	NC12	NC13	NC14	NC15	NC16	NC17	NC18	NC19	NC20	Mean NC	QC01	QC02	QC03
384	ACar(14:0)	0.898167	372.288	96.4732	3.64653e-07	4.59349e-07	1.3957e-07	2.89357e-07	5.96264e-07	8.82228e-07	8.76062e-07	1.03619e-06	1.17816e-06	8.83792e-07	7.43458e-07	1.49885e-09	4.0073e-07	1.24853e-06	1.11561e-06	5.84011e-07	5.9156e-07	6.9764e-07	1.00513e-06	1.10332e-06	7.09856e-07	4.70947e-07	3.08852e-07	5.25814e-07	4.27378e-07	5.51425e-07	5.65932e-07	2.37812e-07	5.08462e-07	2.50898e-07	8.40581e-07	3.92074e-07	7.58836e-07	9.96624e-07	3.28772e-07	3.30258e-07	5.20389e-07	9.45203e-07	1.29333e-06	9.23936e-07	8.24508e-07	6.00102e-07	6.67037e-07	7.57956e-07	5.54417e-07
364	ACar(14:1)	0.904837	370.295	66.3037	4.06795e-06	6.43922e-06	6.07967e-06	4.35452e-06	5.16906e-06	5.94952e-06	7.38509e-06	8.77219e-06	1.18992e-09	9.35497e-06	1.34665e-05	1.09145e-05	7.63154e-06	7.50561e-06	6.03206e-06	1.08238e-05	4.51483e-06	1.05846e-05	1.41994e-05	1.50806e-05	7.91634e-06	7.93415e-06	2.17126e-06	1.3838e-05	5.1044e-06	1.19871e-05	3.94659e-06	2.41387e-05	1.72823e-05	1.10395e-05	1.19971e-09	7.63014e-06	2.4985e-06	1.21068e-09	9.70462e-06	6.83898e-06	1.18155e-09	1.27249e-09	5.52073e-06	1.18301e-05	1.16476e-05	7.65587e-06	1.23619e-05	1.02692e-05	1.07179e-05
318	ACar(14:2)	0.928647	368.313	91.3949	1.31681e-05	2.23734e-06	8.22011e-06	9.41081e-06	3.00154e-06	1.89183e-06	3.34452e-06	2.72602e-06	1.69026e-06	3.26641e-06	1.228e-09	6.55159e-06	3.73949e-06	2.58324e-06	3.303e-06	1.89648e-06	8.76084e-06	7.19491e-06	4.48421e-06	1.4873e-06	4.44796e-06	4.99004e-06	6.1374e-06	8.75546e-06	3.47288e-06	4.51346e-06	4.53321e-06	3.10429e-06	7.57201e-06	5.11207e-06	2.07819e-06	4.47303e-06	4.78503e-06	2.86391e-06	1.29905e-09	1.62844e-06	3.61481e-06	1.27249e-09	4.43378e-06	7.11605e-06	6.28317e-06	4.27349e-06	2.20271e-06	3.26209e-06	2.2316e-06
831	ACar(15:1)	0.587156	384.31	77.8586	1.32375e-05	3.68958e-06	3.34981e-06	1.28133e-09	1.47131e-09	3.22135e-06	3.02724e-06	3.53992e-06	3.13408e-06	1.24641e-09	1.228e-09	3.756e-06	3.56385e-06	2.58463e-06	3.40263e-06	3.05385e-06	2.63744e-06	1.50377e-09	3.1793e-06	2.80444e-06	2.90942e-06	1.30829e-09	1.40393e-09	3.36454e-06	4.50765e-06	1.28533e-09	3.33241e-06	2.94253e-06	3.25883e-06	1.34107e-09	2.92859e-06	3.57798e-06	2.20168e-06	1.83893e-06	2.77598e-06	3.12496e-06	3.03571e-06	1.27249e-09	2.8577e-06	1.81728e-09	3.50213e-06	2.1629e-06	3.26352e-06	2.94108e-06	2.91297e-06
234	ACar(16:0)	0.950883	400.341	130.069	2.10549e-05	9.07188e-06	8.55034e-06	1.02085e-05	1.01519e-05	1.67355e-05	1.79453e-05	1.95004e-05	1.18992e-09	1.85471e-05	2.96843e-05	2.83663e-05	1.76162e-05	2.07397e-05	8.37534e-06	2.69612e-05	1.0069e-05	1.69412e-05	2.96936e-05	2.72962e-05	1.73755e-05	1.29787e-05	1.13367e-05	1.22256e-09	1.0242e-05	1.59442e-05	7.29024e-06	4.6209e-05	2.03049e-05	2.71363e-05	1.19971e-09	1.27222e-05	3.97175e-07	1.21068e-09	1.47071e-05	8.7892e-06	4.23615e-05	5.20532e-05	9.86947e-06	2.02667e-05	1.39354e-05	1.63274e-05	2.63138e-05	2.10497e-05	2.29797e-05
593	ACar(16:1)	0.845792	398.326	81.5213	8.63473e-06	7.5266e-06	6.19054e-06	4.82764e-06	5.10782e-06	6.69859e-06	8.08645e-06	2.01344e-05	1.18992e-09	1.94581e-05	3.22434e-05	2.31643e-05	1.8416e-05	1.74795e-05	9.22976e-06	3.35793e-05	1.01367e-05	2.0787e-05	3.14266e-05	3.16626e-05	1.57396e-05	8.42095e-06	4.78419e-06	3.05734e-05	5.81563e-06	1.70968e-05	9.43555e-06	2.96114e-05	1.25652e-05	1.6746e-05	4.0711e-05	9.69785e-06	4.76826e-06	1.21068e-09	1.26656e-05	6.01686e-06	1.18155e-09	5.05351e-05	8.06047e-06	1.8638e-05	1.42709e-05	1.50208e-05	3.64855e-05	2.07045e-05	2.03243e-05
66	ACar(16:2)	0.994535	396.31	69.1831	4.96304e-08	1.41147e-06	1.02768e-06	2.42771e-07	7.3104e-07	2.22546e-06	4.29566e-06	1.03317e-05	1.18992e-09	1.38389e-05	1.78069e-05	7.69757e-06	5.13752e-06	1.35525e-05	4.76914e-06	1.3385e-05	1.88183e-06	1.27597e-05	1.79481e-05	1.85661e-05	7.383e-06	8.50323e-07	2.55924e-07	8.32198e-06	1.36017e-07	3.54126e-06	7.4074e-07	1.10414e-05	6.61665e-06	5.68255e-06	1.62101e-05	2.80837e-06	8.19577e-07	2.19798e-05	6.69198e-06	1.02102e-06	2.63649e-05	1.27249e-09	4.46728e-06	7.16351e-06	9.57818e-06	6.71464e-06	1.02499e-05	1.05127e-05	9.23882e-06
49	ACar(16:3)	0.997711	394.295	63.8266	1.14672e-06	1.81844e-06	2.03942e-06	2.51913e-07	7.96599e-07	3.07144e-06	5.40716e-06	5.28676e-06	1.18992e-09	7.12057e-06	6.18242e-06	2.28689e-06	2.51825e-06	1.01699e-05	3.78449e-06	5.02641e-06	6.45968e-06	1.0487e-05	8.85526e-06	8.78218e-06	4.57463e-06	3.65879e-07	2.10758e-07	3.89521e-06	9.99017e-07	2.56886e-06	1.38918e-06	6.47374e-06	5.76778e-06	6.48749e-06	7.1093e-06	4.21373e-06	1.82506e-06	8.77899e-06	3.29521e-06	1.23108e-06	1.18155e-09	1.27249e-09	6.46481e-06	9.54643e-06	5.31499e-06	3.797e-06	5.82731e-06	6.17411e-06	5.99248e-06
369	ACar(18:0)	0.902842	428.373	152.619	4.39699e-05	2.24511e-05	1.79616e-05	2.03449e-05	2.46431e-05	3.36845e-05	4.05165e-05	6.07927e-05	1.18992e-09	4.92138e-05	8.74762e-05	9.34582e-05	5.00128e-05	5.79519e-05	2.52655e-05	7.64431e-05	3.55255e-05	3.50882e-05	9.26736e-05	6.39104e-05	4.65692e-05	3.27787e-05	3.43338e-05	0.000103888	1.99201e-05	3.75269e-05	2.81206e-05	9.19583e-05	4.66736e-05	6.7914e-05	0.000119069	4.04102e-05	2.01412e-05	1.21068e-09	2.98163e-05	2.06504e-05	9.99725e-05	9.30707e-05	4.10374e-05	8.25769e-05	3.96089e-05	5.24735e-05	5.94402e-05	6.64875e-05	5.99092e-05
184	ACar(18:1)	0.962938	426.279	162.887	3.7791e-06	1.29e-06	2.15774e-06	7.36773e-07	2.17731e-06	1.38747e-07	1.612e-07	1.10165e-06	1.75071e-07	3.94542e-07	1.02416e-06	1.28423e-06	1.16688e-06	4.76856e-07	2.19668e-06	1.1284e-06	2.92258e-07	1.36428e-06	1.42671e-06	3.07644e-07	1.13901e-06	1.2669e-06	1.60361e-06	1.61525e-06	1.2002e-06	2.22656e-06	7.89279e-07	1.95285e-07	1.19335e-09	4.95101e-07	8.30316e-07	5.7041e-07	7.2483e-07	6.05519e-08	2.07584e-06	4.14294e-07	4.60635e-07	9.21366e-07	8.17265e-07	1.23717e-06	1.24151e-06	9.37378e-07	1.68495e-06	1.70514e-06	7.84547e-07
67	ACar(18:2)	0.994269	424.362	102.835	1.10246e-05	1.73397e-06	5.03049e-06	3.58329e-06	3.61881e-06	2.83589e-06	3.20275e-06	7.94296e-06	1.18992e-09	3.93522e-06	3.58893e-06	1.49885e-09	2.19316e-06	6.10382e-07	2.43653e-06	6.09096e-06	3.26063e-06	1.21872e-06	3.66818e-06	5.94294e-06	3.59606e-06	6.71742e-06	8.14477e-06	1.22256e-09	5.28456e-06	1.91758e-06	5.98249e-06	1.21998e-09	3.189e-06	3.54886e-06	1.19971e-09	2.50525e-06	4.32877e-06	1.21068e-09	4.02711e-06	2.787e-06	1.18155e-09	1.27249e-09	1.66114e-06	3.53272e-06	4.64891e-06	2.91415e-06	3.74443e-06	3.57492e-06	3.98604e-06
140	ACar(18:3)	0.976033	422.326	75.2686	4.26118e-07	1.81721e-06	8.34502e-07	7.37016e-07	1.5772e-06	1.6692e-06	4.65066e-06	8.46824e-06	1.18992e-09	1.04915e-05	1.33913e-05	7.76881e-06	5.63105e-06	1.4995e-05	4.78162e-06	7.32743e-06	2.55453e-06	1.20268e-05	1.33611e-05	1.62084e-05	6.43594e-06	7.71461e-07	7.28407e-07	1.11801e-05	9.17786e-07	2.76731e-06	1.41496e-06	9.11784e-06	7.2924e-06	6.17163e-06	8.95194e-06	2.98315e-06	1.23337e-06	1.58048e-05	5.83623e-06	1.14158e-06	2.13021e-05	1.27249e-09	3.76545e-06	6.97463e-06	8.74996e-06	5.85532e-06	7.75103e-06	8.44421e-06	8.41492e-06
687	ACar(20:1)	0.770563	454.389	157.732	7.7261e-07	1.47059e-06	1.97496e-06	5.04214e-07	1.56934e-06	3.14925e-06	5.21244e-06	5.76794e-06	1.18992e-09	5.07112e-06	9.3202e-06	1.19038e-05	3.38387e-06	4.2531e-06	3.531e-06	1.06873e-05	8.84368e-07	3.50143e-06	1.06169e-05	6.57293e-06	4.50743e-06	1.83282e-06	2.5106e-06	8.20552e-06	4.72517e-07	7.02742e-06	2.34315e-06	1.95288e-05	5.4617e-06	9.96588e-06	1.19971e-09	5.70271e-06	1.1314e-07	1.21068e-09	4.95493e-06	1.52751e-06	1.18155e-09	1.27249e-09	1.06727e-06	2.37396e-06	3.49729e-06	3.82951e-06	1.13616e-05	1.239e-05	1.16522e-05
128	ACar(20:2)	0.979303	452.394	144.13	6.08904e-06	1.09513e-06	3.42908e-06	1.07888e-06	1.28182e-06	1.16476e-06	2.0594e-06	4.00352e-06	3.46801e-06	1.36403e-06	1.70071e-06	1.49885e-09	1.32855e-06	7.23439e-07	7.15433e-07	3.39398e-06	2.02118e-06	1.4136e-06	2.04537e-06	2.61654e-06	2.0497e-06	2.7469e-06	4.17148e-06	1.83444e-06	2.61143e-06	1.18386e-06	2.07826e-06	3.35159e-06	6.25639e-07	1.72841e-06	2.06588e-06	6.08276e-07	1.45019e-06	1.21068e-09	2.03952e-06	1.77781e-06	4.43331e-06	1.27249e-09	1.2335e-06	2.68923e-06	1.34628e-06	1.89892e-06	2.09443e-06	1.36522e-06	2.25774e-06
1	ACar(20:3)	1	450.347	82.6057	5.72449e-07	7.0102e-07	1.46536e-09	1.45795e-07	7.92779e-07	2.69398e-07	1.93364e-07	9.22382e-07	1.18992e-09	1.38638e-06	1.64569e-06	1.64039e-06	5.19944e-07	1.76545e-06	1.61977e-06	7.83053e-07	8.50264e-08	1.09316e-06	1.12124e-06	1.54312e-06	8.40153e-07	2.04537e-08	8.94671e-07	1.24179e-06	4.7459e-08	2.28886e-07	1.8511e-08	3.39143e-07	3.80954e-07	1.77082e-07	1.58221e-06	8.89273e-07	6.1216e-08	9.49489e-07	2.10424e-07	6.04868e-07	7.25449e-07	1.43776e-06	3.58412e-07	6.23686e-07	1.2191e-06	6.00542e-07	5.87917e-07	6.04851e-07	6.50149e-07
63	ACar(20:4)	0.995736	448.341	83.0671	2.58285e-05	4.70036e-06	7.309e-06	8.50293e-06	2.45423e-05	1.36617e-05	1.38522e-05	2.99276e-05	1.18992e-09	4.11728e-05	4.35485e-05	4.17289e-05	2.21364e-05	4.39471e-05	4.49838e-05	2.70984e-05	1.05334e-05	4.03943e-05	3.40893e-05	4.24813e-05	2.6022e-05	3.55789e-06	3.77235e-06	3.59857e-05	3.01851e-06	9.44883e-06	2.71043e-06	1.76924e-05	1.87742e-05	1.33666e-05	3.91917e-05	1.29326e-05	3.34829e-06	2.95369e-05	1.24735e-05	2.1772e-05	2.78458e-05	4.53321e-05	2.3191e-05	3.46647e-05	3.47543e-05	1.96685e-05	2.38667e-05	2.41547e-05	2.4927e-05
682	AcylGlcADG(20:3/22:6/22:6)	0.772652	1175.78	440.091	4.57478e-09	1.13026e-05	1.93661e-05	1.28133e-09	1.85503e-05	1.72765e-05	1.28882e-05	1.71621e-05	1.14682e-05	1.67822e-05	1.15299e-05	2.18749e-05	2.39391e-05	1.13798e-05	1.2795e-05	1.66233e-05	1.42618e-09	2.21317e-05	1.53518e-05	1.15359e-05	1.35982e-05	1.1232e-05	1.60986e-05	1.42431e-05	1.69716e-05	1.38927e-05	1.72726e-05	1.36634e-05	1.18136e-05	1.34107e-09	1.15116e-05	1.51092e-05	1.47214e-05	1.43737e-05	1.15926e-05	1.33352e-05	9.28324e-06	1.22884e-05	1.46456e-05	1.81728e-09	1.3288e-05	1.2267e-05	1.20311e-05	1.52649e-05	1.52736e-05
65	BMP(18:1/18:2)	0.994854	790.557	300.48	1.0718e-05	1.08692e-05	9.01709e-06	1.28133e-09	9.70107e-06	9.75071e-06	7.28668e-06	5.7809e-06	7.36681e-06	9.05875e-06	1.07554e-05	6.13521e-06	5.03753e-06	7.84067e-06	7.02344e-06	1.15089e-05	6.77537e-06	6.76147e-06	7.51258e-06	1.17511e-09	7.44511e-06	1.46993e-05	7.463e-06	9.51006e-06	7.39518e-06	9.8982e-06	7.18601e-06	1.05057e-05	1.10863e-05	9.5509e-06	1.08552e-05	1.06078e-05	6.85567e-06	7.81875e-06	5.69743e-06	6.64905e-06	1.13003e-05	1.06245e-05	5.88991e-06	8.77994e-06	6.29001e-06	8.93316e-06	8.31031e-06	8.03316e-06	8.37535e-06
347	BMP(18:2/22:6)	0.912332	836.542	245.014	1.2978e-05	2.07173e-05	1.24009e-05	1.56884e-05	1.79964e-05	1.19187e-05	7.83945e-06	1.33023e-09	1.39859e-05	7.36466e-06	1.87419e-05	8.51001e-06	9.28372e-06	8.97462e-06	1.17946e-05	1.14948e-05	1.06619e-05	1.017e-05	7.77565e-06	1.17511e-09	1.0915e-05	8.76505e-06	1.23408e-05	1.22256e-09	5.75434e-06	9.30797e-06	7.94463e-06	8.16312e-06	1.27854e-05	7.26465e-06	9.09347e-06	9.54124e-06	1.28293e-05	1.21658e-05	1.04917e-05	8.80329e-06	1.45324e-05	1.10969e-05	9.79337e-06	6.34123e-06	9.24772e-06	9.31318e-06	1.28592e-05	9.25038e-06	9.82159e-06
148	BMP(20:4/22:6)	0.975095	860.593	267.385	3.61523e-06	2.81199e-06	1.02571e-07	2.92558e-06	2.22689e-06	1.87389e-06	3.82531e-07	1.33023e-09	9.65627e-07	1.46568e-08	2.33958e-06	5.16773e-07	2.0286e-06	1.04389e-06	1.43233e-06	1.83456e-06	2.09377e-06	1.79299e-06	1.36252e-07	1.55019e-06	1.48446e-06	1.80818e-06	1.59595e-06	9.21882e-07	9.19944e-07	2.36735e-06	1.60167e-06	1.99282e-07	1.19335e-09	2.51026e-07	5.9441e-07	3.46836e-07	1.43021e-06	7.3984e-07	2.13302e-07	1.66356e-06	6.20196e-07	3.26372e-08	1.40542e-06	1.31249e-06	8.10084e-07	9.41773e-07	1.07107e-06	6.91538e-07	1.33538e-06
59	BMP(22:5/22:6)	0.996183	886.556	260.236	2.97961e-06	3.86299e-06	6.44318e-06	3.04114e-06	5.53421e-06	2.79809e-06	6.31613e-06	5.91373e-06	1.18992e-09	5.34313e-06	5.56349e-06	4.71115e-06	3.26864e-06	6.13499e-06	7.00877e-06	4.91611e-06	8.23467e-06	6.1332e-06	3.71545e-06	1.17511e-09	4.59605e-06	5.17076e-06	4.32114e-06	6.50065e-06	3.1753e-06	5.3342e-06	6.15398e-06	6.2634e-06	6.17313e-06	6.31779e-06	5.89354e-06	4.70975e-06	9.52784e-06	4.49561e-06	4.98606e-06	4.38217e-06	6.27163e-06	6.88969e-06	5.74195e-06	4.24792e-06	5.55544e-06	5.6056e-06	5.53151e-06	5.57864e-06	5.20423e-06
84	BMP(22:6/22:6)	0.990515	884.543	227.229	3.19091e-06	4.66022e-06	5.92075e-06	1.19565e-06	3.91358e-06	1.97851e-06	4.83962e-06	8.60686e-06	1.18992e-09	5.26229e-06	5.81327e-06	1.1024e-05	1.40859e-06	9.26025e-06	5.74731e-06	6.02119e-06	6.67085e-06	3.36501e-06	3.80451e-06	8.1675e-06	5.0426e-06	6.35161e-06	4.84298e-06	1.22256e-09	3.12551e-06	6.79227e-06	7.95556e-06	7.21604e-06	7.16872e-06	4.53324e-06	3.45534e-06	8.00948e-06	7.28429e-06	5.62613e-06	5.73921e-06	6.3346e-06	8.11225e-06	8.86318e-06	1.03252e-05	4.83136e-06	8.70624e-06	6.26372e-06	6.95315e-06	6.44964e-06	6.66429e-06
213	CE(18:1)	0.956488	668.625	713.293	0.000175984	1.87092e-05	7.69237e-05	7.62682e-05	2.48445e-05	1.64521e-05	2.71473e-05	2.76363e-05	3.82316e-05	8.38739e-05	3.95945e-05	7.63864e-05	0.000131157	5.30948e-05	4.47866e-05	8.24495e-05	4.32424e-05	8.87946e-05	4.27857e-05	2.18797e-05	5.95121e-05	3.16605e-05	1.86227e-05	9.6689e-06	1.68728e-05	5.30785e-05	2.33715e-05	1.85712e-05	3.08103e-05	7.43826e-05	2.1739e-05	6.76028e-05	2.04439e-05	1.89123e-05	3.13444e-05	6.39535e-05	2.07564e-05	4.2107e-05	5.16835e-05	1.81728e-09	3.19685e-05	3.23776e-05	5.29785e-05	5.13933e-05	4.51729e-05
335	CE(18:2)	0.918067	666.617	713.404	0.00156418	0.000162907	0.000634151	0.000616363	0.000210976	0.000140118	0.00022393	0.000237595	0.000319558	0.00069887	0.00032319	0.000606845	1.42029e-09	0.000449254	0.000357583	0.000715233	0.000375159	0.00076567	0.000344144	0.000183863	0.00044648	0.000272003	0.000161568	7.64931e-05	0.000145113	0.000440803	0.000199835	0.000159863	0.000239112	0.00065573	0.000185052	0.000585251	0.000171564	0.000158213	0.00025939	0.000523019	0.000183479	0.000370368	0.000448695	1.81728e-09	0.000260674	0.000274811	0.000433372	0.000432767	0.000379482
194	CE(20:3)	0.961057	692.633	716.722	9.49661e-05	3.21895e-05	3.04027e-05	6.49338e-05	2.21372e-05	8.84426e-06	1.88082e-05	4.62982e-05	1.20912e-05	2.32903e-05	1.69441e-05	2.56636e-05	5.09707e-05	1.98594e-05	7.56347e-05	4.52477e-05	2.36701e-05	7.61988e-05	1.93698e-05	1.82057e-05	3.62863e-05	2.18697e-05	1.31373e-05	6.66464e-06	1.54897e-05	3.49372e-05	1.21298e-05	1.94508e-05	2.54229e-05	6.30883e-05	1.12018e-05	1.26938e-09	2.48755e-05	9.62833e-06	3.57086e-05	6.18572e-05	4.93397e-05	2.16081e-05	2.58878e-05	1.81728e-09	1.7239e-05	2.3477e-05	3.34553e-05	3.58306e-05	3.79287e-05
220	CE(20:4)	0.954737	690.618	702.929	0.000299955	4.35957e-05	0.000136864	0.000175053	4.90197e-05	4.39408e-05	4.50485e-05	8.66473e-05	7.62716e-05	9.43827e-05	6.12183e-05	0.000176333	0.000152343	5.23784e-05	0.000118058	0.000155287	9.71739e-05	0.000232382	8.20868e-05	4.6059e-05	0.000111205	5.09165e-05	3.85238e-05	2.95727e-05	4.16788e-05	9.51575e-05	4.36701e-05	4.58915e-05	4.25504e-05	0.000175348	4.34314e-05	0.000168858	5.94524e-05	4.47136e-05	5.51257e-05	0.000120112	9.0488e-05	5.74038e-05	7.23377e-05	1.81728e-09	5.47923e-05	6.65013e-05	9.94428e-05	9.49225e-05	0.00010237
252	CE(22:4)	0.946592	718.647	703.195	3.12446e-05	8.76678e-06	1.51715e-05	1.85502e-05	6.34893e-06	5.34446e-06	5.13867e-06	8.7485e-06	7.70031e-06	7.1248e-06	5.50372e-06	1.35411e-05	1.07933e-05	4.91318e-06	1.14419e-05	1.25726e-05	9.47817e-06	1.50377e-09	8.25266e-06	3.0563e-06	9.68466e-06	5.08176e-06	4.28354e-06	3.78175e-06	3.91978e-06	1.06517e-05	5.08007e-06	5.13452e-06	4.45079e-06	1.39443e-05	4.94444e-06	1.77402e-05	9.92993e-06	4.38537e-06	6.03823e-06	1.86908e-05	7.75083e-06	6.26965e-06	6.92008e-06	1.81728e-09	6.06141e-06	7.25305e-06	1.37649e-05	8.95322e-06	9.81455e-06
206	CE(22:5)	0.958291	716.632	710.956	8.56827e-05	2.93859e-05	3.31984e-05	5.34702e-05	2.27429e-05	1.78496e-05	1.65669e-05	6.0087e-05	1.02564e-05	1.77219e-05	1.43324e-05	1.46913e-05	3.51185e-05	9.88396e-06	1.32527e-09	3.37171e-05	2.68433e-05	1.50377e-09	2.10901e-05	2.35384e-05	2.6309e-05	2.05777e-05	1.51258e-05	1.18114e-05	1.06007e-05	2.33339e-05	9.12915e-06	1.89413e-05	2.78863e-05	1.34107e-09	1.36832e-05	4.5032e-05	2.72777e-05	1.00719e-05	2.26977e-05	1.33743e-09	1.18155e-09	1.69164e-05	1.81053e-05	1.81728e-09	1.28336e-05	1.52015e-05	3.00608e-05	3.2898e-05	2.82731e-05
236	CE(22:6)	0.950289	714.616	692.255	0.000131059	3.28831e-05	5.55733e-05	4.58116e-05	2.197e-05	1.32546e-05	2.07959e-05	4.3623e-05	3.33912e-05	3.51845e-05	2.08614e-05	1.49885e-09	4.67088e-05	2.94643e-05	5.6577e-05	5.58197e-05	4.38125e-05	6.50974e-05	2.39405e-05	1.56286e-05	3.95729e-05	3.59168e-05	2.06597e-05	2.16776e-05	2.07022e-05	3.46178e-05	2.55499e-05	2.82575e-05	3.15786e-05	1.34107e-09	1.98204e-05	1.26938e-09	3.19392e-05	2.06223e-05	3.12686e-05	1.33743e-09	5.10444e-05	3.75954e-05	4.50677e-05	1.81728e-09	3.87892e-05	2.47557e-05	5.05843e-05	5.19872e-05	4.92473e-05
639	Cer/ADS(d20:0/22:2)	0.814415	708.597	551.723	5.17402e-06	1.15487e-06	0.000122001	4.44646e-06	2.18314e-06	7.23303e-06	9.06194e-05	5.78645e-06	9.91033e-06	1.39173e-06	9.28938e-05	0.000136048	1.05206e-05	1.87346e-06	8.53751e-06	1.41795e-05	7.67853e-06	2.47607e-06	0.000135231	8.88952e-06	3.34114e-05	7.90153e-05	5.26761e-06	2.77136e-06	6.15906e-06	0.000104603	6.68804e-06	8.22707e-05	1.93231e-06	9.72889e-05	7.85719e-06	9.07541e-05	9.99009e-05	7.977e-06	6.77637e-06	1.06348e-06	4.51279e-06	4.49424e-06	2.23289e-06	2.24067e-06	2.63197e-06	3.08219e-05	4.75508e-06	1.10735e-06	7.74561e-05
382	Cer/ADS(d21:0/19:0)	0.898625	684.596	574.725	4.57478e-09	0.000232841	0.000201846	0.000199484	0.000211394	0.000222545	0.000221072	0.000240751	0.000213311	0.000227976	0.000220806	0.000266542	0.000261821	0.000225097	0.000240583	0.000239766	0.000243332	0.000237123	0.00025706	0.000241126	0.000220224	0.000207951	0.000233219	0.000204934	0.000236233	0.000237668	0.000221334	0.000194084	0.000208756	0.000201164	0.000209578	0.000207932	0.000241764	0.000217656	0.000199354	0.000221684	0.000200649	0.000222258	0.00022664	0.000252083	0.000244722	0.000219483	0.000185362	0.000202312	0.000194877
392	Cer/ADS(d23:0/19:0)	0.894552	712.647	588.778	4.57478e-09	3.87845e-05	1.79631e-05	3.0663e-05	3.16518e-05	2.94834e-05	3.28904e-05	3.8423e-05	3.22262e-05	4.05289e-05	1.228e-09	2.88428e-05	5.29073e-05	1.13128e-09	3.78458e-05	4.79323e-05	3.92694e-05	3.28812e-05	2.57736e-05	5.74698e-05	3.07772e-05	3.95704e-05	4.01219e-05	4.17405e-05	3.6012e-05	3.87459e-05	3.73993e-05	4.21573e-05	5.20428e-05	3.17578e-05	4.18817e-05	3.64026e-05	4.26483e-05	4.359e-05	4.61622e-05	3.64076e-05	3.87762e-05	4.78964e-05	5.03297e-05	1.84693e-05	3.64456e-05	3.99279e-05	3.74966e-05	4.04022e-05	4.06651e-05
608	Cer/ADS(d27:0/15:1)	0.83337	710.612	576.326	0.000239485	0.000235433	0.000152978	2.90091e-05	4.11737e-05	1.76719e-05	1.75405e-05	1.61899e-05	0.000145588	0.000112307	2.11454e-05	0.000297566	0.00010609	8.59631e-05	0.000168319	2.25266e-05	3.47689e-05	3.49578e-05	4.24175e-05	0.000106841	9.63986e-05	7.79049e-05	0.000202561	0.000109872	0.000206202	9.70312e-05	1.16547e-05	2.22374e-05	4.21864e-05	1.26388e-05	2.61566e-05	0.000163985	0.000207306	0.000165755	4.78389e-05	0.000118769	3.04219e-05	6.29233e-05	7.58135e-05	0.000134618	2.36212e-05	9.19749e-05	0.0001821	1.12354e-05	2.44922e-05
675	Cer/AP(t28:0/14:1)	0.784545	726.624	531.242	4.57478e-09	2.20255e-05	1.89349e-05	1.96154e-05	1.33134e-05	1.36332e-05	1.44787e-05	2.32796e-05	1.18992e-09	1.70958e-05	2.47514e-05	1.6743e-05	1.97124e-05	2.3824e-05	1.95199e-05	2.67875e-05	1.38302e-05	1.7946e-05	1.49496e-05	1.17511e-09	1.60224e-05	1.98158e-05	1.46517e-05	1.75931e-05	1.58198e-05	1.94208e-05	1.84981e-05	1.50244e-05	1.66731e-05	1.47764e-05	1.6953e-05	1.53884e-05	1.12926e-05	1.21068e-09	2.06714e-05	1.4673e-05	1.81279e-05	1.37436e-05	1.63027e-05	1.08354e-05	1.92849e-05	1.54774e-05	1.77737e-05	1.98432e-05	2.13011e-05
584	Cer/AS(d18:1/16:0)	0.853664	598.504	431.767	3.15086e-05	1.3956e-05	1.0163e-05	1.04572e-05	6.9817e-06	1.12117e-05	5.79602e-06	1.12464e-05	7.55449e-06	8.90817e-06	9.92162e-06	9.82365e-06	9.70708e-06	1.01647e-05	1.35617e-05	9.12465e-06	8.43054e-06	9.2625e-06	1.04822e-05	1.03605e-05	1.09311e-05	6.80732e-06	7.74313e-06	4.94583e-06	1.12051e-05	1.28533e-09	8.74447e-06	8.82678e-06	7.37198e-06	9.9365e-06	7.83634e-06	6.92774e-06	8.99898e-06	1.1336e-05	6.35073e-06	6.84936e-06	7.27456e-06	6.59837e-06	9.00561e-06	1.00472e-05	9.77891e-06	7.82931e-06	8.04526e-06	8.81064e-06	8.64535e-06
635	Cer/AS(d18:2/16:0)	0.817946	596.488	388.83	7.56798e-06	1.06621e-05	7.70011e-06	6.81023e-06	5.89098e-06	9.3624e-06	4.17331e-06	1.37129e-05	9.1693e-06	8.46929e-06	1.20175e-05	1.19545e-05	1.06455e-05	1.2207e-05	1.42867e-05	1.17626e-05	8.15085e-06	7.4917e-06	1.37535e-05	1.17511e-09	9.28949e-06	8.87746e-06	7.26179e-06	7.36038e-06	1.06821e-05	1.64106e-05	1.0425e-05	5.39632e-06	6.75213e-06	6.68276e-06	8.43392e-06	6.33205e-06	7.69268e-06	1.2127e-05	5.0255e-06	6.31065e-06	9.58049e-06	6.02255e-06	1.07527e-05	8.91605e-06	1.38509e-05	8.74465e-06	8.41116e-06	9.89588e-06	1.03077e-05
702	Cer/BS(d22:3/25:1)	0.756245	728.593	597.586	4.64114e-07	4.10397e-07	2.77792e-07	4.08213e-07	6.70167e-07	3.55447e-07	6.48742e-07	4.18585e-07	2.9817e-07	3.6668e-07	6.29893e-07	3.62802e-07	5.82521e-07	5.85797e-07	6.44423e-07	3.65396e-07	6.95646e-07	4.31095e-07	7.66786e-07	5.36656e-07	4.95966e-07	6.43595e-07	4.34718e-07	9.07318e-07	5.99065e-07	2.74238e-07	5.78301e-07	6.32791e-07	4.64633e-07	1.93034e-07	4.00205e-07	4.35003e-07	1.78898e-07	6.92384e-07	3.38891e-07	4.92954e-07	3.65963e-07	7.26426e-07	6.57076e-07	1.60798e-07	4.29396e-07	4.80284e-07	2.1897e-07	2.84365e-07	9.01688e-07
671	Cer/BS(d23:3/22:1)	0.789941	700.6	509.109	2.03792e-06	2.689e-06	2.45587e-06	2.3383e-06	1.94455e-06	4.04168e-06	8.71709e-07	2.36257e-06	2.215e-06	3.8804e-06	1.28141e-06	3.55644e-06	1.54013e-06	1.8267e-06	3.53494e-06	1.731e-06	2.64157e-06	1.66084e-06	2.80004e-06	2.93419e-06	2.41721e-06	7.07586e-07	3.39088e-06	9.7716e-07	1.89852e-06	3.0046e-06	2.60351e-06	1.84354e-06	8.70939e-07	2.24213e-06	1.44726e-06	2.48527e-06	1.84569e-06	1.74568e-06	1.20822e-06	1.60804e-06	1.27804e-06	1.38266e-06	1.1266e-06	3.54362e-06	2.31682e-06	1.87634e-06	2.12933e-06	1.96402e-06	2.14679e-06
684	Cer/NDS(d16:0/28:0)	0.770968	680.701	559.644	4.57478e-09	9.54023e-05	0.00011873	0.000102459	0.000108693	9.81936e-05	9.69293e-05	9.01487e-05	7.70296e-05	9.42641e-05	9.02873e-05	0.000116181	0.000109041	7.93797e-05	0.00010266	9.35628e-05	0.000111764	0.00011359	0.0001038	7.93043e-05	9.40712e-05	9.17251e-05	0.000106334	9.61971e-05	0.000109406	9.78313e-05	0.00010005	8.79285e-05	8.9885e-05	9.44617e-05	9.18539e-05	9.24221e-05	0.000103921	8.32549e-05	9.34049e-05	0.000106095	8.23231e-05	9.44604e-05	8.57403e-05	0.000149148	0.000106759	9.81601e-05	9.26721e-05	9.1364e-05	8.97246e-05
888	Cer/NDS(d16:0/28:2)	0.523316	720.652	604.13	6.2814e-05	4.77873e-05	4.06838e-05	4.83716e-05	3.03236e-05	3.94118e-05	3.26313e-05	3.99278e-05	1.18992e-09	4.33694e-05	3.69716e-05	1.49885e-09	3.82775e-05	4.09119e-05	5.45632e-05	1.27075e-09	4.9582e-05	6.07631e-05	3.90602e-05	4.83053e-05	3.7688e-05	4.78855e-05	3.68116e-05	2.57612e-05	4.19752e-05	4.36527e-05	4.81779e-05	4.42386e-05	2.14813e-05	5.12795e-05	4.11898e-05	3.34556e-05	2.73188e-05	1.21068e-09	3.98099e-05	3.43898e-05	4.95625e-05	3.71267e-05	2.99329e-05	5.19156e-05	4.35504e-05	3.74758e-05	4.39926e-05	4.08765e-05	3.86346e-05
853	Cer/NDS(d18:0/15:1)	0.565617	568.493	431.625	7.65147e-05	5.04871e-05	2.84187e-05	3.58707e-05	3.26502e-05	5.14812e-05	2.85495e-05	6.01329e-05	5.78059e-05	3.72706e-05	4.35461e-05	6.96944e-05	7.09479e-05	4.95182e-05	6.35781e-05	7.78265e-05	4.64777e-05	4.02668e-05	6.29401e-05	5.479e-05	5.19384e-05	5.41538e-05	4.66713e-05	3.59714e-05	4.22013e-05	5.9081e-05	4.88051e-05	3.57247e-05	2.93922e-05	3.98777e-05	3.68084e-05	4.26404e-05	4.67184e-05	5.36862e-05	3.39864e-05	3.84083e-05	5.52463e-05	3.40195e-05	4.43587e-05	4.81694e-05	5.2761e-05	4.39341e-05	4.04779e-05	4.35672e-05	4.59586e-05
714	Cer/NDS(d18:0/16:0)	0.751243	584.526	473.305	0.00012626	5.06936e-05	3.51043e-05	5.37588e-05	4.64684e-05	5.30087e-05	3.2732e-05	4.56618e-05	1.18992e-09	4.90748e-05	4.77483e-05	6.98877e-05	6.16824e-05	4.25925e-05	7.05298e-05	6.11313e-05	5.72087e-05	6.19072e-05	6.4882e-05	5.0881e-05	5.40607e-05	8.13081e-05	5.7619e-05	2.70905e-05	4.55523e-05	7.44573e-05	4.31125e-05	7.12747e-05	3.67495e-05	5.74923e-05	6.03068e-05	5.42243e-05	2.95416e-05	5.03015e-05	2.88813e-05	4.84038e-05	6.13662e-05	5.43053e-05	4.83838e-05	7.18585e-05	5.97924e-05	5.31011e-05	4.82211e-05	5.0932e-05	5.39027e-05
735	Cer/NDS(d18:0/18:0)	0.741436	612.562	519.032	4.24933e-05	1.37901e-05	1.6839e-05	1.49612e-05	1.5048e-05	2.16863e-05	2.59568e-05	2.53825e-05	3.45808e-05	1.20493e-05	1.97414e-05	1.38335e-05	1.38301e-05	1.92781e-05	1.1708e-05	1.33106e-05	3.20193e-05	1.34287e-05	1.25094e-05	1.27409e-05	1.92594e-05	3.65198e-05	1.25214e-05	2.47221e-05	1.33588e-05	1.76756e-05	2.90007e-05	2.19717e-05	1.36727e-05	2.79936e-05	1.679e-05	1.29204e-05	1.55255e-05	1.30134e-05	2.05517e-05	1.45771e-05	3.4013e-05	2.58744e-05	1.92883e-05	1.53448e-05	1.01698e-05	1.97753e-05	1.87333e-05	1.22125e-05	1.90139e-05
753	Cer/NDS(d18:0/20:0)	0.717668	640.544	533.025	2.06161e-06	9.75129e-07	1.14216e-06	1.41394e-06	8.36422e-07	8.15452e-07	9.04001e-07	1.08124e-06	1.28621e-06	9.17128e-07	1.56874e-06	1.29784e-06	1.49059e-06	9.28838e-07	1.7325e-06	1.27075e-09	8.97164e-07	1.04141e-06	8.52759e-07	1.09848e-06	1.11714e-06	1.51049e-06	7.46935e-07	4.51479e-07	7.41502e-07	1.12541e-06	8.10885e-07	8.0237e-07	1.00633e-06	1.05987e-06	1.04193e-06	5.70016e-07	5.91481e-07	1.48867e-06	1.061e-06	1.35163e-06	6.5965e-07	9.29541e-07	1.13038e-06	1.06485e-06	6.74026e-07	9.40922e-07	9.12296e-07	1.1044e-06	1.25241e-06
834	Cer/NDS(d18:0/21:1)	0.582505	652.587	558.212	6.54875e-05	6.80921e-05	3.30142e-05	4.79835e-05	5.1839e-05	7.06211e-05	5.04912e-05	8.2138e-05	8.80867e-05	7.72059e-05	8.45317e-05	7.47167e-05	0.000101108	0.000100035	6.83928e-05	0.000100464	6.64282e-05	4.19056e-05	8.81703e-05	9.29387e-05	7.26825e-05	9.05023e-05	7.09289e-05	6.35439e-05	6.21245e-05	8.4283e-05	5.89074e-05	5.06693e-05	5.32855e-05	5.89724e-05	5.38647e-05	6.20055e-05	7.37318e-05	7.06837e-05	5.02664e-05	5.71819e-05	8.19339e-05	7.33096e-05	7.77349e-05	4.92007e-05	6.4924e-05	6.54027e-05	6.34401e-05	7.0276e-05	7.02488e-05
768	Cer/NDS(d18:0/22:0)	0.695908	668.619	587.485	0.000109364	1.96057e-05	1.64164e-05	2.42237e-05	2.63964e-05	2.83002e-05	2.03726e-05	2.56624e-05	4.31669e-05	3.4587e-05	3.46707e-05	3.14065e-05	3.46423e-05	3.14429e-05	3.11861e-05	3.37865e-05	3.06395e-05	2.70691e-05	2.96491e-05	3.02332e-05	3.31411e-05	4.546e-05	3.22277e-05	2.18512e-05	2.6416e-05	3.06508e-05	1.97358e-05	4.05213e-05	2.18149e-05	1.34107e-09	4.56078e-05	2.68004e-05	2.00314e-05	2.64597e-05	2.05563e-05	2.86552e-05	3.21697e-05	4.32406e-05	2.84521e-05	2.99387e-05	2.61875e-05	2.83389e-05	2.93624e-05	2.96968e-05	3.07401e-05
711	Cer/NDS(d18:0/24:0)	0.752968	696.651	617.749	0.000134683	2.65234e-05	2.33065e-05	3.52816e-05	3.86158e-05	4.03512e-05	3.03813e-05	3.88487e-05	4.48472e-05	4.00351e-05	4.21488e-05	4.43051e-05	5.52234e-05	4.40815e-05	4.16553e-05	4.66224e-05	5.01011e-05	3.64509e-05	3.875e-05	4.44611e-05	4.48337e-05	5.24659e-05	4.07033e-05	2.5171e-05	3.66399e-05	3.98037e-05	2.89446e-05	5.61646e-05	3.52213e-05	6.20708e-05	1.19971e-09	3.62079e-05	3.52455e-05	3.66986e-05	3.26323e-05	4.49293e-05	3.81278e-05	5.96711e-05	3.86246e-05	4.74149e-05	3.59999e-05	3.91369e-05	3.75733e-05	4.01276e-05	3.72364e-05
713	Cer/NDS(d18:0/24:1)	0.751625	694.625	573.951	0.00015049	0.000191128	0.000153308	0.000164257	0.000141693	0.000140742	0.000147546	0.000242705	0.000234091	0.000178656	0.000219252	0.00020635	0.00021651	0.00021124	0.000263565	0.000240202	0.000159085	0.00016714	0.000209778	1.17511e-09	0.000181887	0.000165462	0.000162642	0.000146383	0.000147789	0.000207719	0.000139462	0.000175643	0.000154278	0.000122233	0.000196833	0.000128144	0.000104478	0.000265132	0.00017052	0.000136942	0.000182697	0.000174815	0.000163848	0.000122778	0.000191841	0.000162982	0.000183992	0.000180072	0.000172661
877	Cer/NDS(d19:0/13:1)	0.539912	554.479	406.217	0.000112953	8.55582e-05	3.47503e-05	7.2922e-05	4.2868e-05	7.81973e-05	4.236e-05	8.85049e-05	7.40526e-05	4.80194e-05	6.80716e-05	0.000104433	0.000132828	9.05408e-05	0.000110951	0.000130864	7.07993e-05	7.46503e-05	9.25131e-05	9.03148e-05	8.23075e-05	9.93771e-05	6.42e-05	4.24197e-05	8.14181e-05	9.02065e-05	9.76948e-05	6.75844e-05	4.95203e-05	7.11806e-05	5.17386e-05	7.59458e-05	7.17658e-05	8.76704e-05	5.32037e-05	6.34995e-05	9.7705e-05	7.14149e-05	7.80415e-05	9.13493e-05	8.24311e-05	7.44184e-05	6.73884e-05	7.25961e-05	7.50284e-05
685	Cer/NDS(d19:0/22:0)	0.770968	638.655	478.904	4.57478e-09	5.13005e-05	7.60424e-05	4.68818e-05	5.9892e-05	5.2071e-05	4.67502e-05	5.25429e-05	3.58725e-05	4.12305e-05	4.251e-05	7.70845e-05	6.33909e-05	3.30458e-05	5.70954e-05	4.18628e-05	5.42339e-05	7.06475e-05	5.44822e-05	3.76875e-05	4.97314e-05	3.48464e-05	6.43375e-05	4.95775e-05	5.90096e-05	5.11055e-05	5.71691e-05	4.13976e-05	4.69533e-05	4.24402e-05	4.81924e-05	4.39507e-05	6.18053e-05	4.23086e-05	4.8171e-05	5.62445e-05	3.10128e-05	3.48765e-05	3.97236e-05	9.4759e-05	6.18721e-05	5.04877e-05	4.30714e-05	4.50704e-05	4.56502e-05
875	Cer/NDS(d19:0/22:2)	0.540777	678.558	514.326	3.33785e-05	1.87743e-05	1.82576e-05	1.66362e-05	1.81181e-05	1.78538e-05	1.4972e-05	2.08036e-05	1.65846e-05	1.80887e-05	2.17165e-05	2.37498e-05	2.11648e-05	2.27327e-05	1.32527e-09	2.22721e-05	1.88243e-05	1.809e-05	1.32309e-09	1.17511e-09	1.71011e-05	1.5479e-05	1.87664e-05	1.24553e-05	1.74697e-05	1.75499e-05	1.64053e-05	1.46747e-05	1.54792e-05	1.4201e-05	1.76497e-05	1.41279e-05	1.85048e-05	1.7013e-05	1.56969e-05	1.60479e-05	1.91616e-05	1.95588e-05	1.81795e-05	2.01146e-05	2.26389e-05	1.70587e-05	1.62282e-05	1.61245e-05	1.45584e-05
862	Cer/NDS(d19:0/24:1)	0.556963	708.576	657.987	4.35916e-07	1.49221e-07	1.48553e-07	1.73196e-07	1.31319e-07	1.35098e-09	2.30197e-07	1.33023e-09	1.02882e-07	9.80632e-08	1.21089e-07	2.26893e-07	1.62367e-07	1.04152e-07	2.19294e-07	1.22624e-07	5.97233e-08	1.94871e-07	1.79798e-07	5.26469e-08	1.45774e-07	8.04637e-08	1.65371e-07	9.50969e-08	1.09377e-07	1.17359e-07	1.42924e-07	1.09871e-07	1.36334e-07	1.73765e-07	1.40321e-07	1.05823e-07	1.03321e-07	1.15319e-07	9.51835e-08	9.01093e-08	9.27712e-08	1.27249e-09	1.52708e-07	9.96429e-08	9.14609e-08	1.10925e-07	2.40214e-07	2.24491e-07	9.0115e-08
858	Cer/NDS(d20:0/21:1)	0.561814	680.62	590.852	0.000228406	0.000302585	0.000167065	0.000263299	0.000283309	0.000262782	0.000266308	0.000452559	0.00038017	0.00039341	0.000558284	0.000305832	0.000460809	0.000475893	0.000344773	0.000523088	0.000259377	0.000214645	0.000368486	1.17511e-09	0.000325554	0.000353152	0.000363196	0.000333679	0.000263878	0.000319566	0.000251628	0.000295427	0.000374663	0.00020718	0.000342971	0.000285857	0.000306136	0.000333004	0.000299327	0.000235655	0.000369492	0.00036405	0.000482753	0.000189902	0.000277238	0.000312438	0.000319225	0.000346283	0.000346201
854	Cer/NDS(d20:0/23:1)	0.565114	708.643	594.555	9.48054e-07	2.81791e-06	2.61737e-06	4.29739e-06	2.71232e-06	2.01181e-06	2.21799e-06	5.26252e-06	1.18992e-09	3.03152e-06	3.25234e-06	2.52353e-06	4.3688e-07	3.5664e-06	6.03956e-06	1.09557e-06	1.6467e-06	3.08442e-06	4.38877e-06	1.17511e-09	2.59767e-06	4.01327e-07	1.72059e-06	2.29483e-06	3.8349e-06	3.22303e-06	2.72977e-06	3.7625e-06	1.96268e-06	2.58961e-06	1.52515e-06	2.90997e-06	3.59261e-06	3.52177e-06	1.80659e-06	2.56799e-06	5.35652e-06	1.35481e-06	1.52541e-06	9.96005e-07	3.68333e-06	2.56797e-06	3.30351e-06	2.42467e-06	2.4785e-06
829	Cer/NDS(d21:0/23:1)	0.593328	722.665	633.03	4.57478e-09	4.2165e-05	2.19201e-05	4.97196e-05	5.15848e-05	5.58378e-05	3.92554e-05	3.92463e-05	4.03225e-05	5.07356e-05	4.30432e-05	4.3834e-05	5.10323e-05	6.09686e-05	5.73455e-05	6.31019e-05	6.64011e-05	3.89118e-05	3.35718e-05	6.17943e-05	4.55398e-05	6.23392e-05	6.12486e-05	2.93157e-05	4.94726e-05	5.47145e-05	6.27767e-05	6.96936e-05	5.22265e-05	4.00308e-05	5.0468e-05	4.88183e-05	4.68312e-05	3.96401e-05	4.29081e-05	5.51649e-05	5.66101e-05	7.24896e-05	4.05305e-05	3.97992e-05	4.41909e-05	5.09635e-05	4.69173e-05	4.95862e-05	5.05499e-05
579	Cer/NS(d16:1/16:0)	0.859641	510.488	405.873	2.34919e-05	2.06541e-05	1.0969e-05	1.83251e-05	8.75591e-06	2.17285e-05	1.05993e-05	2.70933e-05	2.41353e-05	1.41381e-05	2.12903e-05	3.37486e-05	3.84519e-05	2.86003e-05	3.66613e-05	3.83708e-05	1.96649e-05	7.86734e-06	2.9602e-05	2.85341e-05	2.31341e-05	2.77054e-05	2.03277e-05	1.35531e-05	2.22532e-05	2.46469e-05	2.74324e-05	1.80181e-05	1.71269e-05	1.80199e-05	1.71144e-05	2.1047e-05	1.68001e-05	2.73111e-05	1.50064e-05	1.90306e-05	2.9421e-05	1.99141e-05	2.19238e-05	2.30414e-05	2.57066e-05	2.127e-05	2.3468e-05	2.23073e-05	1.05615e-05
391	Cer/NS(d17:1/16:0)	0.895202	524.504	431.436	2.03462e-05	1.15809e-05	9.87586e-06	9.88268e-06	6.65945e-06	1.35364e-05	8.50966e-06	1.64446e-05	1.86982e-05	1.04822e-05	1.43559e-05	2.07032e-05	2.13193e-05	1.66968e-05	1.91065e-05	2.38016e-05	1.45023e-05	9.83449e-06	2.17518e-05	1.86733e-05	1.53381e-05	1.69228e-05	1.18127e-05	9.98634e-06	1.06769e-05	1.74775e-05	1.33577e-05	1.06562e-05	1.05922e-05	1.12297e-05	1.26302e-05	1.49138e-05	1.18215e-05	1.71897e-05	9.25255e-06	1.07653e-05	1.61888e-05	1.04759e-05	1.41523e-05	1.24624e-05	1.79704e-05	1.30267e-05	1.65329e-05	1.48871e-05	1.2406e-05
667	Cer/NS(d17:1/22:0)	0.794482	608.597	558.038	1.59714e-05	1.18666e-05	5.73215e-06	9.12793e-06	8.81943e-06	1.27413e-05	8.09577e-06	1.67943e-05	1.5086e-05	1.42564e-05	1.56487e-05	1.58958e-05	2.00965e-05	1.86686e-05	1.31645e-05	2.10933e-05	1.2164e-05	7.94966e-06	1.55824e-05	1.65545e-05	1.37655e-05	1.68518e-05	1.40639e-05	1.15565e-05	1.13729e-05	1.63537e-05	1.05648e-05	8.88287e-06	1.00789e-05	9.44273e-06	9.32741e-06	1.18745e-05	1.32504e-05	1.34339e-05	8.46955e-06	1.0357e-05	1.36271e-05	1.23107e-05	1.59583e-05	5.61362e-06	1.44307e-05	1.18911e-05	1.28455e-05	1.36348e-05	1.21077e-05
905	Cer/NS(d17:1/24:2)	0.48787	676.621	559.855	2.60902e-05	7.2829e-06	6.55581e-06	6.71336e-06	6.814e-06	6.54744e-06	5.65681e-06	5.16115e-06	4.5733e-06	5.8276e-06	4.49996e-06	6.37755e-06	6.16807e-06	4.47488e-06	5.58498e-06	4.994e-06	6.56162e-06	7.22784e-06	7.04201e-06	4.8909e-06	6.95222e-06	4.88743e-06	7.29821e-06	5.59099e-06	7.75478e-06	6.5529e-06	7.91078e-06	5.06205e-06	4.67113e-06	6.13761e-06	5.85991e-06	5.73724e-06	6.41016e-06	4.79725e-06	5.71562e-06	7.04864e-06	5.10905e-06	5.39295e-06	5.11428e-06	9.52932e-06	6.04696e-06	6.13136e-06	5.01612e-06	4.79974e-06	4.80539e-06
686	Cer/NS(d17:3/16:1)	0.770968	518.456	343.493	1.12104e-05	7.78266e-06	7.43836e-06	1.28133e-09	6.09671e-06	1.23831e-05	1.30837e-09	5.70066e-06	3.03531e-06	4.54734e-06	5.00586e-06	5.89127e-06	5.33252e-06	5.9671e-06	4.69285e-06	1.26998e-05	1.42618e-09	4.6185e-06	2.85352e-06	6.86193e-06	5.60609e-06	6.69071e-06	1.09428e-05	7.67762e-06	4.64937e-06	5.61263e-06	6.10372e-06	5.04043e-06	7.3782e-06	5.80346e-06	6.95463e-06	5.94017e-06	1.18805e-05	1.09535e-05	6.74127e-06	7.86652e-06	3.94662e-06	9.49863e-06	9.2884e-06	6.94022e-06	4.5006e-06	7.2205e-06	7.45265e-06	8.23459e-06	5.84187e-06
375	Cer/NS(d18:1/16:0)	0.90156	538.537	478.862	0.000758836	0.00019383	0.000244286	0.000195873	1.47131e-09	0.000192541	0.000192561	0.000182897	0.000162749	1.24641e-09	0.000162817	0.000233453	0.000228476	0.000156711	0.000197726	0.000170244	1.42618e-09	0.000235594	0.000198946	0.000160649	0.00019341	0.000158652	0.000217687	0.000194696	0.000210415	0.000189257	0.000204356	0.000170201	0.000183183	0.00017488	0.000174516	0.000177812	0.000212035	0.00015904	0.0001831	0.000200137	0.000139222	0.000159017	0.000165897	1.81728e-09	0.000211661	0.000174288	0.000183596	0.000177226	0.000178846
783	Cer/NS(d18:1/17:0)	0.667303	596.526	478.658	6.27624e-05	3.89786e-05	2.04105e-05	2.83089e-05	3.0969e-05	5.06188e-05	2.17695e-05	4.39929e-05	5.07404e-05	3.08199e-05	3.72389e-05	4.66447e-05	3.73096e-05	3.9604e-05	4.56474e-05	1.27075e-09	3.60688e-05	2.85643e-05	4.05498e-05	3.88621e-05	3.64931e-05	5.47479e-05	3.98101e-05	2.83405e-05	2.84955e-05	5.1278e-05	5.24405e-05	2.44997e-05	2.49495e-05	3.07437e-05	2.98603e-05	3.06996e-05	3.05279e-05	3.26394e-05	2.54227e-05	2.62274e-05	5.61546e-05	2.56304e-05	4.03725e-05	3.20431e-05	4.47402e-05	3.54812e-05	3.05875e-05	3.3127e-05	3.36484e-05
330	Cer/NS(d18:1/18:0)	0.920456	566.551	499.581	0.00018071	0.000106091	6.75639e-05	0.000117988	8.51159e-05	0.000145381	7.83743e-05	0.00011524	1.18992e-09	0.000168563	0.000114293	0.000172914	0.000118394	0.000172305	0.000130112	0.000127667	0.000151291	0.000108498	0.000160031	0.000153835	0.000123719	0.000159966	0.000136997	7.27014e-05	0.000113506	0.000147515	0.000148327	8.8212e-05	9.82442e-05	0.000108559	7.07601e-05	0.000103235	0.000103397	0.000102419	5.59768e-05	0.000108113	0.000162007	0.000123255	0.000147402	0.000167575	0.000149815	0.000118399	0.000125621	0.00011886	0.000122012
374	Cer/NS(d18:1/20:0)	0.901784	594.582	539.332	9.71702e-05	0.00010304	5.14064e-05	8.91927e-05	6.21127e-05	0.000103656	6.10448e-05	9.56343e-05	0.000133963	0.000145336	0.000107197	0.000116613	8.44367e-05	1.13128e-09	0.000110134	9.97166e-05	0.000120519	8.47973e-05	0.000111678	0.000140598	9.59124e-05	0.000167271	0.000112695	6.66899e-05	9.00259e-05	0.000133873	9.6766e-05	6.67263e-05	8.65946e-05	8.50264e-05	6.84293e-05	8.3499e-05	9.91597e-05	9.92889e-05	6.01812e-05	7.5893e-05	0.000125304	0.000129345	0.000112301	4.29223e-05	0.000123669	9.6283e-05	0.000108927	0.000104296	0.00010299
329	Cer/NS(d18:1/22:0)	0.920653	622.612	574.309	0.000539781	0.000601219	0.000312928	0.000441561	0.000221724	0.00057741	0.000460907	0.000685817	0.000801723	0.000830167	0.000823568	0.000574523	0.000730345	0.000959694	0.000708025	0.000796002	0.000699149	0.00055053	0.000724325	0.000916657	0.000647803	0.000630288	0.000764806	0.000538337	0.000568615	0.000850018	0.000541139	0.000544423	0.000690201	0.000462509	0.00054183	0.000316903	0.000235499	0.000685996	0.000435262	0.000517407	0.000663872	0.000767847	0.000777679	0.000449677	0.000693262	0.000583778	0.000613744	0.000629517	0.000614595
546	Cer/NS(d18:1/22:1)	0.872479	620.532	513.189	6.78399e-06	1.21183e-05	8.7678e-07	8.6251e-07	9.91025e-06	4.34978e-07	8.52383e-06	8.12978e-06	6.90857e-06	7.14968e-06	6.82106e-06	8.00541e-06	1.33251e-05	1.34742e-05	1.12663e-05	9.30869e-06	8.4559e-06	1.0652e-05	6.64733e-06	1.73341e-06	7.5694e-06	1.30829e-09	8.46686e-06	4.60648e-06	1.3029e-05	7.42093e-06	6.85724e-06	8.87997e-06	1.30232e-05	5.8018e-06	6.95414e-06	6.69158e-06	6.40306e-06	3.77683e-06	1.06705e-05	8.37089e-06	4.7775e-06	7.76947e-06	1.06593e-05	9.73998e-06	1.22797e-05	7.80899e-06	7.58259e-06	7.98638e-06	9.37425e-06
856	Cer/NS(d18:1/22:2)	0.56274	662.573	508.918	8.142e-05	8.88251e-05	6.63718e-05	7.59485e-05	6.89761e-05	0.000120621	4.89519e-05	9.04082e-05	9.35118e-05	0.000126731	8.49271e-05	9.53054e-05	7.23668e-05	0.000121227	0.000110293	7.46436e-05	8.23019e-05	6.00268e-05	0.000101188	0.000123338	8.93692e-05	9.56694e-05	0.000102011	4.17543e-05	7.79405e-05	0.000102422	6.87197e-05	6.92889e-05	6.1585e-05	6.62634e-05	6.34159e-05	7.51131e-05	5.51745e-05	7.06021e-05	5.71632e-05	5.93502e-05	9.90368e-05	9.57455e-05	6.42091e-05	7.67058e-05	7.56469e-05	7.38908e-05	7.64751e-05	8.58007e-05	8.48975e-05
559	Cer/NS(d18:1/23:0)	0.868401	636.628	590.355	0.000100875	0.00012361	7.09843e-05	0.000105962	0.000113382	0.000112683	0.000109676	0.000189359	0.000156991	0.00015462	0.000224304	0.000137296	0.0001942	0.000180453	0.00015604	0.000238845	0.000117114	9.33898e-05	0.000164618	0.000219341	0.000148187	0.000140821	0.000145005	0.000142715	0.000109917	0.000131259	9.88933e-05	0.000118255	0.000139692	9.27407e-05	0.000137665	0.000126167	0.000122795	0.000135965	0.000101549	0.000102747	0.0001563	0.000136656	0.000214567	8.80946e-05	0.000136692	0.000128925	0.000139164	0.000129952	0.000138025
349	Cer/NS(d18:1/24:0)	0.909695	650.643	605.49	0.000758991	0.000835019	0.000493682	0.000661056	0.000743376	0.000754676	0.000658732	0.000975549	0.000765502	0.00101416	0.000979733	0.000779203	0.00123788	0.00121562	0.0009873	0.00125598	0.000912151	0.000723984	0.000837619	1.17511e-09	0.000829511	0.000741569	0.000942015	0.000679457	0.000794828	0.000445232	0.000692403	0.000815839	0.00104327	0.000590954	0.000836161	0.000393229	0.000900555	0.000929888	0.000828671	0.000764634	0.000746719	0.000960374	0.000974527	0.000548363	0.000995927	0.00078123	0.000860322	0.00082683	0.000839867
353	Cer/NS(d18:1/24:1)	0.908741	648.618	550.525	9.64414e-06	1.24211e-05	4.60751e-06	1.07581e-05	1.18593e-05	2.64656e-06	5.72065e-06	8.6019e-06	4.78772e-06	7.31982e-06	7.81183e-06	7.93794e-06	1.63167e-05	1.40891e-05	1.05042e-05	6.98781e-06	8.70407e-06	1.27057e-05	5.65356e-06	7.57781e-06	8.83277e-06	1.30829e-09	1.06606e-05	5.28885e-06	1.0165e-05	9.42956e-06	6.70694e-06	6.54804e-06	1.22073e-05	4.8386e-06	5.41993e-06	4.47094e-06	6.64709e-06	1.21068e-09	1.01995e-05	6.57794e-06	2.71338e-06	7.01685e-06	1.69037e-05	1.04064e-05	1.50253e-05	7.56143e-06	9.0462e-06	7.65438e-06	7.66937e-06
638	Cer/NS(d18:1/24:2)	0.814742	646.613	544.655	0.000222492	0.000267084	0.000248538	0.000264892	0.000193766	0.000262961	0.000174066	0.000335085	0.000264961	0.000293327	0.000299316	0.000287394	0.000302555	0.000363481	0.000378626	0.000326751	0.000267104	0.000228058	0.000330139	1.17511e-09	0.00026553	0.000242937	0.000263327	0.000170077	0.000212126	0.000290615	0.000194566	0.000172367	0.000213729	0.000193843	0.0002361	0.000196273	0.00018199	0.000307433	0.000210422	0.000177052	0.000254073	0.00026372	0.00025074	0.000201887	0.000287078	0.000226018	0.000245777	0.000254957	0.000260718
627	Cer/NS(d18:1/25:1)	0.823311	662.644	589.263	9.4339e-06	1.59574e-05	1.11952e-05	1.42203e-05	1.17394e-05	1.33815e-05	1.17101e-05	1.91758e-05	1.9051e-05	1.18833e-05	1.26676e-05	2.01649e-05	2.16415e-05	1.90955e-05	1.87834e-05	1.27075e-09	1.24409e-05	1.17885e-05	1.74191e-05	1.75969e-05	1.44674e-05	2.05112e-05	1.41825e-05	1.06392e-05	1.35551e-05	1.8116e-05	1.47844e-05	9.77713e-06	8.75902e-06	9.56877e-06	9.95607e-06	1.19168e-05	1.19042e-05	1.86569e-05	1.0987e-05	9.62728e-06	2.16666e-05	1.32232e-05	1.60544e-05	9.14463e-06	1.19392e-05	1.32485e-05	1.65866e-05	1.00122e-05	1.57828e-05
641	Cer/NS(d18:1/26:1)	0.811689	676.592	626.74	1.06509e-07	3.22394e-07	3.322e-08	2.56838e-07	2.76522e-07	3.73477e-07	1.30837e-09	3.36615e-07	2.90049e-07	2.58862e-07	3.03367e-07	4.0875e-07	2.67268e-07	2.67146e-07	2.05148e-07	1.27075e-09	2.4715e-07	9.63081e-08	1.75477e-07	5.87717e-07	2.4077e-07	1.9729e-07	1.56328e-07	1.43978e-07	2.45248e-07	4.24516e-07	2.27326e-07	2.70232e-07	6.25021e-07	6.0618e-07	3.53376e-07	3.1029e-07	5.507e-07	1.21068e-09	3.00247e-07	3.0211e-07	1.18155e-09	1.27249e-09	2.99523e-07	1.29171e-07	8.46844e-08	2.61494e-07	3.51244e-07	3.822e-07	3.86583e-07
745	Cer/NS(d18:1/26:2)	0.729361	674.631	605.53	4.57478e-09	5.66788e-05	4.9493e-05	4.72802e-05	5.77398e-05	5.43368e-05	5.2291e-05	6.09277e-05	5.08623e-05	6.01897e-05	5.8111e-05	6.50486e-05	7.56384e-05	6.32793e-05	6.52462e-05	7.28723e-05	6.19858e-05	5.58858e-05	6.17035e-05	6.83334e-05	5.68954e-05	4.69661e-05	6.54072e-05	4.90706e-05	5.87756e-05	6.43306e-05	5.33333e-05	5.31029e-05	6.38633e-05	4.81631e-05	5.49349e-05	5.80467e-05	6.47782e-05	5.61774e-05	5.40386e-05	5.62444e-05	4.92317e-05	5.81e-05	6.07613e-05	1.81728e-09	7.10336e-05	5.43181e-05	5.47195e-05	5.61413e-05	5.43425e-05
839	Cer/NS(d18:2/14:0)	0.575485	552.463	359.502	4.42905e-06	9.50986e-06	2.66097e-06	7.16742e-06	4.49432e-06	6.79614e-06	5.44071e-06	1.04263e-05	9.28072e-06	5.33194e-06	8.76531e-06	8.08818e-06	1.0254e-05	1.21119e-05	1.26981e-05	1.4539e-05	6.49452e-06	6.80199e-06	1.01371e-05	1.23313e-05	8.38794e-06	1.10252e-05	6.8219e-06	4.84106e-06	7.6612e-06	1.1498e-05	9.15948e-06	8.4819e-06	7.7141e-06	6.42935e-06	8.67465e-06	9.07202e-06	6.59278e-06	1.39618e-05	5.98137e-06	7.40938e-06	6.90497e-06	1.07483e-05	8.30659e-06	7.6236e-06	7.67355e-06	8.32906e-06	7.92213e-06	9.37098e-06	9.64004e-06
340	Cer/NS(d18:2/16:0)	0.915511	536.504	414.377	8.04092e-05	4.82393e-05	4.41107e-05	4.93386e-05	4.00767e-05	5.15097e-05	4.32478e-05	7.8154e-05	4.74607e-05	4.22895e-05	6.60752e-05	0.000101198	7.1059e-05	6.34941e-05	8.86432e-05	7.91303e-05	6.00058e-05	6.16651e-05	8.8744e-05	8.27307e-05	6.43791e-05	5.89101e-05	4.3699e-05	4.14521e-05	5.89655e-05	6.85485e-05	5.54449e-05	4.73469e-05	5.74865e-05	4.70952e-05	5.81713e-05	4.66729e-05	5.24328e-05	6.7136e-05	4.5889e-05	4.93087e-05	6.97269e-05	5.19098e-05	5.95066e-05	7.71141e-05	9.40574e-05	5.75437e-05	6.42651e-05	6.18999e-05	6.00799e-05
838	Cer/NS(d18:2/18:0)	0.575637	608.525	463.979	6.95993e-05	3.70264e-05	2.67868e-05	3.49856e-05	3.26008e-05	3.72625e-05	2.8741e-05	4.90008e-05	5.07521e-05	4.0608e-05	3.54847e-05	7.85569e-05	4.70294e-05	5.04422e-05	5.45266e-05	4.76114e-05	4.78388e-05	3.77449e-05	5.55198e-05	5.20824e-05	4.571e-05	3.47856e-05	3.40206e-05	2.38246e-05	4.16625e-05	4.21256e-05	3.90538e-05	2.6907e-05	2.81875e-05	3.48317e-05	2.75243e-05	2.60719e-05	5.17983e-05	4.28268e-05	2.04637e-05	3.74155e-05	4.90879e-05	3.55588e-05	4.33384e-05	5.54128e-05	4.8664e-05	3.71781e-05	3.92479e-05	3.84963e-05	3.92116e-05
793	Cer/NS(d18:2/20:0)	0.653779	636.484	526.491	1.17649e-07	8.26206e-08	2.46042e-07	1.28133e-09	1.29431e-07	2.2733e-07	1.30837e-09	1.167e-07	1.29718e-07	3.36731e-07	1.91744e-07	4.70694e-07	4.80467e-08	7.95564e-08	2.54914e-07	3.01199e-07	1.43528e-07	3.25737e-07	3.7334e-07	4.40324e-07	2.00895e-07	6.2931e-08	3.0078e-07	1.93101e-07	1.6238e-07	2.53486e-07	3.49482e-07	1.75764e-07	1.60449e-07	3.80489e-07	3.49702e-07	2.82987e-07	1.83098e-07	1.21068e-09	1.9845e-07	3.17834e-07	5.42702e-07	3.96793e-07	1.98862e-07	2.61455e-07	3.25404e-07	2.54868e-07	2.09448e-07	1.63681e-07	2.3228e-07
381	Cer/NS(d18:2/22:0)	0.89915	620.598	544.69	0.00012453	0.000124943	9.89878e-05	0.000103358	0.00011974	0.000126777	0.000100137	0.000211292	0.000161404	0.000136771	0.000170353	0.000205926	0.000180946	0.000195848	0.000164071	0.00018928	0.000143073	0.00011551	0.000197556	1.17511e-09	0.000143525	0.000147782	0.000126658	0.000112266	0.000115748	0.000175486	0.000100676	0.00010125	0.000132613	0.000112263	0.000106068	0.000106133	0.00014033	0.000159138	9.34576e-05	0.000108431	0.000133132	0.000131533	0.000142765	0.000123958	0.000163348	0.000126652	0.000134223	0.000134602	0.000143197
350	Cer/NS(d18:2/23:0)	0.909621	634.613	562.533	2.86628e-05	2.9171e-05	1.49578e-05	2.58994e-05	2.6337e-05	2.50536e-05	2.38367e-05	4.70633e-05	3.62295e-05	2.87003e-05	4.34612e-05	4.70641e-05	4.69604e-05	4.0926e-05	2.8546e-05	1.27075e-09	2.66256e-05	2.54598e-05	4.49009e-05	2.98532e-05	3.09855e-05	3.13058e-05	2.87389e-05	2.29949e-05	2.41144e-05	3.41245e-05	1.34889e-05	2.199e-05	2.692e-05	2.19477e-05	2.02268e-05	2.26282e-05	3.02704e-05	2.294e-05	2.36285e-05	2.20082e-05	3.17794e-05	2.61762e-05	3.39875e-05	2.75957e-05	2.51527e-05	2.56009e-05	3.28432e-05	2.30557e-05	3.04513e-05
575	Cer/NS(d18:2/24:0)	0.861344	648.656	619.234	3.0534e-06	6.59146e-07	1.46296e-07	4.08262e-07	7.21e-07	2.82864e-07	3.0718e-07	7.19894e-07	3.34482e-07	6.32728e-07	9.02681e-07	7.14116e-07	1.06817e-06	9.44227e-07	1.1738e-06	1.27075e-09	4.32051e-07	4.25891e-07	5.8703e-07	1.45112e-06	7.4828e-07	1.058e-06	6.71565e-07	5.62192e-07	4.12005e-07	8.61914e-07	4.68117e-07	8.92803e-07	7.23067e-07	2.19816e-07	5.87962e-07	7.38102e-07	7.82267e-07	2.53847e-07	3.38934e-07	5.7064e-07	9.37371e-07	1.05608e-06	6.36323e-07	1.81728e-09	3.57015e-07	6.06492e-07	7.17215e-07	9.52911e-07	7.99346e-07
707	Cer/NS(d18:2/24:1)	0.754496	646.601	574.74	4.57478e-09	3.87526e-05	1.46536e-09	3.16099e-05	4.03169e-05	4.4973e-05	3.89512e-05	3.96847e-05	3.88396e-05	4.68739e-05	4.40798e-05	4.21967e-05	4.50188e-05	4.6238e-05	3.907e-05	4.19973e-05	4.92872e-05	3.85808e-05	4.55752e-05	4.02948e-05	3.76173e-05	3.98575e-05	5.26063e-05	3.51508e-05	4.23172e-05	5.11157e-05	4.56182e-05	3.72022e-05	4.22759e-05	3.57982e-05	3.52854e-05	4.68949e-05	1.47183e-09	3.40531e-05	3.19489e-05	4.22183e-05	3.67804e-05	4.6759e-05	1.27449e-09	1.81728e-09	4.40944e-05	3.4999e-05	3.46325e-05	3.66404e-05	3.64879e-05
363	Cer/NS(d18:2/24:2)	0.905586	644.562	520.617	3.05854e-06	3.17435e-05	1.4417e-06	3.08978e-05	2.5631e-06	2.78389e-05	5.77977e-06	3.57694e-06	3.88213e-06	5.8131e-06	5.57344e-06	3.35481e-05	4.14185e-06	4.56007e-05	5.03864e-05	3.53242e-05	3.62374e-06	5.53005e-06	4.44025e-06	5.23888e-05	1.78577e-05	3.16347e-05	2.64275e-06	5.02028e-06	3.46594e-06	3.02586e-05	2.41848e-05	4.81789e-06	3.74613e-06	2.76024e-06	4.43735e-06	3.58258e-06	3.00829e-06	2.57166e-05	2.5978e-05	2.80145e-06	3.49198e-05	5.08912e-06	5.91877e-06	3.31477e-06	2.08745e-06	1.12693e-05	2.85179e-06	2.94837e-05	2.8823e-05
885	Cer/NS(d18:2/25:0)	0.531552	706.636	592.799	1.80531e-05	6.11298e-06	2.56807e-05	1.83227e-05	2.05766e-05	1.33691e-05	1.5887e-05	2.93495e-05	4.86423e-05	3.97242e-06	4.16713e-06	1.95538e-05	5.98724e-05	5.30126e-05	4.26103e-05	2.77877e-05	3.07858e-05	1.12066e-05	4.28828e-06	4.19635e-05	2.47607e-05	2.51658e-05	2.6072e-05	1.99985e-05	3.19863e-06	1.87738e-05	2.66431e-05	2.04054e-05	3.53996e-05	2.73546e-05	4.8736e-06	3.31847e-06	8.90219e-06	4.9378e-05	3.49754e-05	1.52718e-05	5.69204e-05	4.12835e-05	4.9231e-06	1.09165e-05	2.31625e-05	2.28469e-05	1.90844e-05	4.17942e-05	4.1118e-05
914	Cer/NS(d18:2/25:1)	0.405266	704.618	561.725	7.17358e-05	1.25684e-05	3.99367e-06	1.05995e-05	1.01462e-05	1.50145e-05	5.7755e-06	1.2192e-05	9.03722e-06	8.87289e-06	1.00191e-05	1.13663e-05	1.65728e-05	2.06113e-05	2.23752e-05	2.35986e-05	7.71172e-06	4.8114e-06	1.67035e-05	1.8746e-05	1.56226e-05	1.85184e-05	8.73412e-06	6.92166e-06	7.48035e-06	1.17352e-05	1.17928e-05	6.89844e-06	7.59494e-06	5.42768e-06	1.13205e-05	4.74894e-06	6.01315e-06	1.12807e-05	5.58017e-06	4.44374e-06	1.89328e-05	1.44597e-05	1.36513e-05	2.08896e-05	6.96745e-06	1.01696e-05	1.06237e-05	1.15139e-05	1.0357e-05
830	Cer/NS(d18:2/26:2)	0.589354	716.632	564.116	1.89384e-06	4.09959e-06	3.2501e-06	2.25633e-06	3.01908e-06	2.50929e-06	2.31938e-06	5.4771e-06	4.61868e-06	3.47924e-06	4.7085e-06	4.70397e-06	5.00376e-06	5.42578e-06	4.13305e-06	6.9094e-06	2.42679e-06	2.27997e-06	5.86006e-06	1.17511e-09	3.71875e-06	3.39201e-06	3.10527e-06	3.34603e-06	2.73021e-06	3.29785e-06	2.36216e-06	1.95786e-06	3.15488e-06	2.7232e-06	3.52126e-06	2.51765e-06	3.78191e-06	4.15061e-06	2.11029e-06	2.43966e-06	4.05864e-06	3.34543e-06	4.28759e-06	3.31554e-06	4.12314e-06	3.18606e-06	3.29432e-06	2.97472e-06	2.81227e-06
649	Cer/NS(d19:1/22:0)	0.806602	636.62	562.684	8.38998e-07	2.40815e-06	1.34827e-06	1.59726e-06	1.53082e-06	1.00129e-06	1.04885e-06	4.64004e-06	2.7468e-06	1.97418e-06	3.99263e-06	3.72587e-06	1.40266e-06	3.15983e-06	2.49982e-06	1.27075e-09	2.06684e-06	1.83721e-06	3.84097e-06	1.17511e-09	2.08315e-06	1.81727e-06	1.06723e-06	1.94683e-06	8.79695e-07	2.21264e-06	1.23526e-06	1.36372e-06	2.4517e-06	1.46895e-06	2.06186e-06	1.33857e-06	1.72585e-06	3.03587e-06	1.80615e-06	1.39503e-06	2.4598e-06	1.56472e-06	2.89397e-06	1.30126e-06	1.90225e-06	1.79643e-06	2.38984e-06	2.57889e-06	2.38387e-06
426	Cer/NS(d19:1/24:0)	0.880455	664.658	618.714	1.44323e-05	1.29389e-05	1.16543e-05	1.83888e-05	2.51774e-05	2.44199e-05	1.9107e-05	1.46886e-05	1.95799e-05	1.3265e-05	2.65818e-05	2.56362e-05	3.93724e-05	3.05409e-05	3.05961e-05	1.27075e-09	2.15209e-05	1.46658e-05	1.14307e-05	2.05992e-05	1.97299e-05	1.85913e-05	2.84249e-05	1.8979e-05	2.36996e-05	2.5959e-05	2.49096e-05	2.4844e-05	2.75979e-05	1.60614e-05	2.41005e-05	1.25212e-05	2.80981e-05	1.87889e-05	1.04379e-05	1.94168e-05	2.93757e-05	2.83583e-05	3.17848e-05	1.1746e-05	1.90911e-05	2.21393e-05	2.41258e-05	2.41209e-05	2.44835e-05
840	Cer/NS(d19:1/24:1)	0.575435	706.593	550.364	4.57478e-09	3.67646e-06	2.77233e-06	3.79702e-06	3.60639e-06	3.91599e-06	3.72776e-06	3.98473e-06	2.93454e-06	3.89485e-06	4.22541e-06	3.531e-06	4.32059e-06	4.62693e-06	5.4162e-06	3.54113e-06	5.15621e-06	2.69436e-06	4.7559e-06	5.09585e-06	3.78391e-06	4.27899e-06	3.41653e-06	2.45705e-06	3.03052e-06	3.97932e-06	3.98861e-06	3.71001e-06	3.64946e-06	3.03598e-06	3.70665e-06	2.97258e-06	4.75068e-06	3.40001e-06	3.29081e-06	3.88068e-06	1.18155e-09	5.06014e-06	4.63768e-06	3.08686e-06	4.46293e-06	3.53983e-06	3.07129e-06	3.51897e-06	3.07784e-06
910	Cer/NS(d19:1/24:2)	0.43659	704.632	574.899	4.57478e-09	3.27251e-05	1.46536e-09	2.70818e-05	3.23955e-05	3.25691e-05	3.0084e-05	3.09749e-05	3.00547e-05	3.62534e-05	3.31761e-05	3.00755e-05	3.66025e-05	3.44822e-05	3.18693e-05	3.25548e-05	3.81296e-05	2.98495e-05	3.24757e-05	2.9724e-05	2.90542e-05	3.3812e-05	3.74539e-05	3.11747e-05	3.48879e-05	3.54837e-05	3.44068e-05	3.138e-05	3.27503e-05	3.09036e-05	2.74347e-05	3.4694e-05	3.45231e-05	2.43077e-05	2.69857e-05	3.17275e-05	3.06518e-05	3.56624e-05	3.74192e-05	3.33292e-05	3.14258e-05	3.25207e-05	2.68888e-05	3.00441e-05	2.93493e-05
570	Cer/NS(d20:1/24:0)	0.863172	678.667	604.871	5.59947e-07	1.84046e-06	1.39516e-06	1.76292e-06	6.7326e-07	7.24986e-07	1.17456e-06	1.72405e-06	2.4918e-06	1.54403e-06	8.79368e-07	2.62528e-06	6.48073e-07	1.59963e-06	1.8465e-06	1.73492e-06	2.41589e-06	9.64236e-07	5.15605e-07	1.84133e-06	1.4481e-06	1.54814e-06	1.79231e-06	7.03072e-07	8.84619e-07	1.70269e-06	8.9905e-07	1.93308e-06	8.93516e-07	1.12014e-06	1.32958e-06	1.11304e-06	3.88491e-07	2.22529e-06	7.39476e-07	1.51316e-06	1.32181e-06	1.38909e-06	3.79583e-07	5.29525e-07	8.85518e-07	1.16456e-06	1.76647e-06	8.79483e-07	1.7689e-06
912	Cer/NS(d23:2/21:1)	0.40657	718.647	591.352	4.57478e-09	1.8604e-05	1.05502e-05	1.45102e-05	1.71198e-05	1.39633e-05	1.529e-05	2.15895e-05	1.91228e-05	1.8128e-05	2.31277e-05	1.76807e-05	2.24842e-05	1.90144e-05	1.74139e-05	2.38524e-05	1.48702e-05	1.26878e-05	1.91413e-05	2.28126e-05	1.70984e-05	1.84155e-05	2.01791e-05	1.67911e-05	1.53486e-05	1.60848e-05	1.46979e-05	1.45342e-05	1.64521e-05	1.19033e-05	1.77317e-05	1.54372e-05	1.74692e-05	1.61373e-05	1.50101e-05	1.34926e-05	1.75733e-05	1.67226e-05	2.35741e-05	1.1507e-05	1.43086e-05	1.61685e-05	1.49122e-05	1.57104e-05	1.53541e-05
274	CL(14:0/22:3/14:0/22:4)	0.944476	1469.01	580.677	1.02146e-05	1.24451e-05	1.02009e-05	1.37144e-05	1.22734e-05	1.91915e-05	1.22929e-05	1.16055e-05	9.21066e-06	1.63511e-05	1.4454e-05	8.07726e-06	7.1596e-06	1.52061e-05	1.54281e-05	1.46982e-05	1.01012e-05	9.33055e-06	1.35758e-05	1.51281e-05	1.2533e-05	2.16224e-05	1.0616e-05	1.3709e-05	1.04379e-05	1.04227e-05	1.24332e-05	1.13651e-05	1.44572e-05	1.22018e-05	1.33013e-05	1.40071e-05	1.09252e-05	1.14103e-05	9.14029e-06	1.38764e-05	1.99698e-05	2.01735e-05	1.45047e-05	9.58644e-06	1.47979e-05	1.34479e-05	1.36299e-05	1.34355e-05	1.25355e-05
429	CL(14:0/22:4/14:0/22:4)	0.878316	1467	580.716	4.57478e-09	2.81364e-05	2.35522e-05	3.04384e-05	2.96199e-05	4.3979e-05	2.73383e-05	2.64778e-05	2.26611e-05	3.75563e-05	2.84551e-05	1.78485e-05	1.82901e-05	3.3913e-05	3.107e-05	3.37288e-05	2.42973e-05	2.09884e-05	2.92495e-05	3.43293e-05	2.70967e-05	4.90413e-05	2.53603e-05	3.1843e-05	2.40537e-05	2.33229e-05	2.76233e-05	2.72491e-05	3.36476e-05	2.86178e-05	2.92197e-05	3.20371e-05	2.56951e-05	2.52426e-05	2.03371e-05	3.03241e-05	1.18155e-09	4.34575e-05	3.28539e-05	2.39215e-05	3.28518e-05	2.8335e-05	3.13921e-05	2.92923e-05	2.72791e-05
290	CL(14:0/22:4/16:0/22:5)	0.941103	1493.02	585.726	4.57478e-09	1.1679e-05	7.10703e-06	8.05802e-06	1.03129e-05	8.62566e-06	1.29681e-05	1.09099e-05	1.28001e-05	1.07543e-05	7.8754e-06	8.98791e-06	1.04757e-05	1.44937e-05	1.14643e-05	9.24854e-06	1.1606e-05	9.9161e-06	9.46642e-06	1.22554e-05	9.95045e-06	1.24122e-05	1.06643e-05	1.28385e-05	1.46506e-05	1.02705e-05	8.68193e-06	1.55737e-05	1.19991e-05	1.08713e-05	9.36442e-06	1.22638e-05	1.31236e-05	1.11847e-05	1.06751e-05	1.1517e-05	1.42288e-05	1.69779e-05	1.4e-05	8.90049e-06	1.21194e-05	1.21159e-05	1.09951e-05	1.08934e-05	1.13989e-05
880	CL(16:0/18:1/18:1/18:2)	0.537673	1427.99	625.077	4.57478e-09	8.10232e-06	6.61515e-06	5.36112e-06	7.94668e-06	7.5291e-06	9.80732e-06	1.08905e-05	1.16272e-05	6.69985e-06	8.81985e-06	9.21427e-06	1.03138e-05	1.00336e-05	8.95369e-06	8.20021e-06	7.66176e-06	8.47664e-06	8.62985e-06	1.17511e-09	7.74443e-06	1.06095e-05	1.22778e-05	1.46319e-05	8.05671e-06	8.07823e-06	8.68543e-06	9.09657e-06	8.83579e-06	9.6693e-06	1.00319e-05	8.01953e-06	1.08614e-05	1.11321e-05	1.17075e-05	7.3659e-06	9.76177e-06	1.38346e-05	8.42418e-06	6.58167e-06	8.36158e-06	9.80117e-06	8.41262e-06	9.90066e-06	9.5831e-06
832	CL(18:1/18:2/18:1/18:2)	0.584996	1452	611.268	2.68316e-05	2.38342e-05	1.84164e-05	2.10657e-05	2.1431e-05	2.40973e-05	2.32684e-05	2.64993e-05	1.18992e-09	2.07749e-05	2.64226e-05	2.21954e-05	2.33492e-05	1.13128e-09	2.5346e-05	3.05189e-05	1.87898e-05	4.10202e-05	2.19095e-05	3.99196e-05	2.27846e-05	3.11552e-05	2.77587e-05	3.36438e-05	2.01146e-05	2.3329e-05	2.48048e-05	2.61113e-05	1.19335e-09	2.78405e-05	2.83316e-05	2.94254e-05	2.22736e-05	3.10223e-05	3.71478e-05	2.64488e-05	2.90039e-05	1.27249e-09	2.57667e-05	1.82524e-05	2.61752e-05	2.44304e-05	4.52516e-05	2.59531e-05	2.49419e-05
882	CL(18:2/18:2/18:2/18:2)	0.5361	1447.97	580.933	0.000103758	0.000108193	8.4539e-05	0.000120027	0.000109642	0.000164589	0.000107718	0.000101159	8.73488e-05	0.000141023	0.000129103	7.29269e-05	7.3397e-05	0.000130571	0.000113123	0.000123049	8.91604e-05	8.34054e-05	0.000109268	0.000132275	0.000109214	0.000181898	8.64777e-05	0.000116044	9.16003e-05	9.51053e-05	0.000108319	0.000101648	0.00011544	0.000106383	0.00011334	0.000107907	9.30075e-05	0.000102925	7.77365e-05	0.000111844	0.000163092	0.000155364	0.000122137	8.0621e-05	0.000112843	0.000112187	9.82876e-05	0.000113768	0.000107617
567	DAG(16:0/22:5)	0.863988	660.555	512.079	4.57478e-09	2.75105e-05	2.56582e-05	4.16909e-05	3.83368e-05	2.07519e-05	2.80657e-05	3.43897e-05	2.56956e-05	3.04592e-05	3.8101e-05	3.50285e-05	5.56981e-05	2.96122e-05	4.60794e-05	4.57527e-05	3.63616e-05	4.18083e-05	2.34716e-05	3.46391e-05	3.29558e-05	1.30829e-09	2.57708e-05	2.00083e-05	2.24024e-05	2.55997e-05	2.69782e-05	2.0242e-05	3.59591e-05	2.62725e-05	2.74434e-05	1.46125e-05	1.88518e-05	1.41637e-05	2.26135e-05	2.24661e-05	1.67477e-05	2.07149e-05	3.18867e-05	3.64437e-05	2.79931e-05	2.28586e-05	2.91631e-05	2.88868e-05	2.676e-05
874	DAG(16:0/22:6)	0.541255	658.54	483.072	0.000120601	0.000147528	0.000121772	0.000103245	0.000139052	9.7263e-05	0.000107872	0.000187938	0.000188373	0.00017349	0.000197638	0.000199212	0.000314532	0.000159885	0.00018715	0.000145388	0.000147169	0.000141549	0.000120954	0.000167594	0.00015841	0.000192788	0.000165995	0.000128661	0.000106244	0.000139966	0.000111581	0.0001049	0.000176258	8.94874e-05	0.00015628	0.000118125	7.64686e-05	9.78641e-05	0.000138373	0.000123892	8.74979e-05	0.00012331	0.000195313	0.000120339	0.000157431	0.000130539	0.000144926	0.000140833	0.000139025
292	DAG(18:0/22:5)	0.940848	688.618	555.381	1.15718e-05	3.36368e-06	4.97186e-06	3.42492e-06	1.47131e-09	2.88515e-06	2.7628e-06	5.01863e-06	4.69682e-06	3.26793e-06	4.35891e-06	5.8389e-06	4.98935e-06	3.21045e-06	4.72082e-06	5.14758e-06	2.79978e-06	4.23298e-06	3.74752e-06	4.43745e-06	4.27244e-06	1.68016e-06	3.00217e-06	2.96291e-06	2.98369e-06	4.18232e-06	3.0103e-06	2.63146e-06	2.67696e-06	3.18208e-06	3.66829e-06	2.42235e-06	2.21191e-06	6.64069e-06	4.22459e-06	2.82687e-06	2.2703e-06	1.96229e-06	2.7734e-06	1.81728e-09	7.04915e-06	3.11819e-06	3.85914e-06	3.82142e-06	2.8593e-06
179	DAG(18:1/20:3)	0.964201	662.571	534.662	0.00293448	0.00217857	0.0019568	0.0028327	0.00319179	0.0018206	0.00129829	0.00279557	0.0019678	0.00225128	0.00366448	0.00339046	0.00289452	0.00250976	0.00306813	0.00242399	0.00212874	0.00328656	0.00182142	0.00221359	0.00253148	1.30829e-09	0.00256198	0.00180471	0.00169842	0.00227691	0.00153474	0.00131131	0.00334468	0.00138673	0.00213733	0.00114066	0.00123506	0.000614343	0.00141915	0.00144739	0.00105429	0.00124532	0.00301668	0.00300771	0.00275506	0.00174962	0.00215898	0.00224547	0.00219573
232	DAG(18:2/18:2)	0.952306	634.539	495.641	0.0010675	0.00114117	0.00124145	0.00131562	0.00155739	0.00124439	0.00101347	0.00160645	0.00135636	0.00128173	0.00144984	0.00180638	0.00135476	0.00137273	0.00167587	0.00132765	0.00124106	0.00140012	0.00119278	0.00180663	0.00137267	0.00195194	0.00128069	0.000921674	0.00122662	0.00130297	0.000850762	0.00090223	0.00176032	0.000786243	0.00130621	0.000869828	0.000888457	0.000577122	0.000980542	0.000850286	0.000634563	0.000813581	0.00111522	0.00124868	0.0013469	0.00108074	0.00125221	0.00118687	0.0012085
339	DAG(18:2/20:3)	0.915746	660.554	484.81	3.91032e-05	8.62724e-05	4.46086e-05	6.10905e-05	4.45803e-05	3.64562e-05	9.47535e-05	6.6025e-05	6.30709e-05	7.11245e-05	9.24578e-05	5.03632e-05	8.28939e-05	0.000111276	6.97226e-05	5.58108e-05	5.2664e-05	5.00467e-05	5.91396e-05	8.58967e-05	6.58678e-05	9.01219e-05	6.1341e-05	5.42297e-05	6.80793e-05	6.35782e-05	5.20978e-05	8.53477e-05	7.97047e-05	4.9575e-05	5.04166e-05	5.79534e-05	6.81701e-05	5.99838e-05	0.000109233	6.24574e-05	7.54216e-05	0.000104321	7.65174e-05	4.3731e-05	6.23024e-05	6.87292e-05	6.63186e-05	7.03793e-05	6.985e-05
807	DAG(18:2/20:4)	0.635464	658.539	466.374	0.000167792	0.000135707	0.000174361	0.000149796	0.000110436	0.0001466	0.000184894	0.00016935	0.000159279	0.000185874	0.000175022	0.000181324	0.000124046	0.000169024	0.000168523	0.000151254	0.00012101	0.000114185	0.000157066	0.000205745	0.000157564	0.000170212	0.00015105	0.000148907	0.000122107	0.00012193	0.000127211	0.00011507	0.000159315	0.000114493	0.000130531	0.000118804	0.000135757	9.50747e-05	0.000151917	0.000118042	0.000134127	0.000151673	0.000118364	0.000119326	0.000138882	0.000132139	0.000147397	0.000134787	0.000138065
613	DAG(20:3/20:3)	0.827069	686.571	523.294	9.96805e-05	9.17374e-05	6.60781e-05	4.83595e-05	9.08523e-05	5.69915e-05	6.82816e-05	0.000121347	0.000110859	0.000138474	0.000156698	0.000114872	0.000122344	0.000116934	0.000125202	9.48235e-05	9.39362e-05	9.88071e-05	6.21607e-05	0.0001346	0.000100652	0.000168247	0.00011694	9.65238e-05	6.75018e-05	8.09745e-05	6.67467e-05	5.76531e-05	0.000103489	4.68493e-05	8.70707e-05	5.51668e-05	4.89007e-05	4.77638e-05	8.12675e-05	6.61266e-05	6.19131e-05	6.90281e-05	0.000162174	0.000100913	9.45598e-05	8.39904e-05	8.70184e-05	8.73249e-05	0.000112073
774	DAG(20:3/20:4)	0.682953	684.556	477.427	3.07175e-05	6.22891e-05	3.65105e-05	3.49895e-05	2.85e-05	2.78878e-05	6.26435e-05	4.89356e-05	5.77306e-05	4.6625e-05	1.228e-09	4.68514e-05	6.18315e-05	5.65765e-05	4.14654e-05	2.5802e-05	3.32129e-05	4.31841e-05	3.5344e-05	6.27888e-05	4.21943e-05	3.30928e-05	4.06139e-05	3.66084e-05	4.59038e-05	4.48454e-05	3.01375e-05	4.88918e-05	4.92134e-05	3.3829e-05	3.14958e-05	6.06774e-05	6.20205e-05	1.21068e-09	7.17401e-05	3.49107e-05	4.08324e-05	4.6663e-05	4.37392e-05	2.73948e-05	3.44997e-05	4.08555e-05	4.49032e-05	5.03439e-05	4.24881e-05
673	DAG(20:4/20:4)	0.787415	682.54	454.108	4.32675e-05	5.24508e-05	4.63482e-05	3.26732e-05	2.94383e-05	4.20684e-05	4.91475e-05	5.87648e-05	7.49754e-05	6.51896e-05	1.228e-09	7.04521e-05	3.95888e-05	4.88575e-05	4.50805e-05	3.88924e-05	3.27827e-05	4.21852e-05	4.15486e-05	5.08619e-05	4.52287e-05	4.73094e-05	4.65142e-05	5.16709e-05	3.93576e-05	4.00359e-05	4.11129e-05	3.68245e-05	3.78766e-05	3.66892e-05	4.37913e-05	4.23464e-05	4.44114e-05	5.81948e-05	5.85758e-05	4.15466e-05	5.37663e-05	5.57163e-05	4.2825e-05	4.19591e-05	3.8375e-05	4.4945e-05	4.52897e-05	4.40983e-05	4.77107e-05
897	DGTS(15:0/26:2)	0.500687	834.713	576.398	2.94416e-05	1.90977e-05	1.096e-05	1.45549e-05	2.16177e-05	1.72621e-05	1.87545e-05	1.78715e-05	1.24287e-05	1.98769e-05	2.70194e-05	1.38303e-05	2.00125e-05	2.49307e-05	1.84332e-05	1.65619e-05	1.77384e-05	1.7291e-05	1.14514e-05	2.57125e-05	1.87423e-05	2.39245e-05	1.88666e-05	2.28509e-05	2.15869e-05	1.85022e-05	2.07291e-05	2.08626e-05	2.75756e-05	1.61973e-05	2.01455e-05	1.78687e-05	1.79714e-05	2.08941e-05	2.52338e-05	2.04593e-05	2.05327e-05	2.48203e-05	2.01597e-05	1.20381e-05	1.72693e-05	2.04244e-05	2.07259e-05	2.04735e-05	1.87447e-05
900	DGTS(16:4/18:5)	0.500687	722.503	78.406	2.5418e-05	4.68591e-06	9.68141e-06	1.44278e-05	9.03501e-06	1.35098e-09	2.28941e-05	1.53801e-05	2.2565e-05	2.08129e-05	1.59834e-05	1.5774e-05	1.43617e-05	1.13128e-09	1.32527e-09	1.32677e-05	5.26924e-06	3.30084e-05	9.13889e-06	7.45654e-06	1.29582e-05	6.21097e-06	8.71689e-06	7.65649e-06	7.13853e-06	5.48974e-06	6.26097e-06	3.02814e-05	4.76916e-06	1.32601e-05	4.32459e-06	2.15498e-05	1.77926e-05	1.07354e-05	1.52601e-05	1.66299e-05	1.50835e-05	2.36276e-05	2.13943e-05	3.82562e-05	3.58642e-05	1.55151e-05	1.36202e-05	1.41846e-05	1.64722e-05
899	DGTS(2:0/15:0)	0.500687	502.316	100.138	0.000222363	6.08659e-05	7.51178e-05	6.41984e-05	6.74627e-05	6.25688e-05	6.04636e-05	5.39324e-05	4.89683e-05	5.55461e-05	5.86849e-05	7.52362e-05	6.61383e-05	5.381e-05	5.84217e-05	5.20377e-05	6.46937e-05	6.6368e-05	6.07852e-05	5.10344e-05	6.89348e-05	6.47021e-05	6.27583e-05	6.25241e-05	6.988e-05	6.19706e-05	6.74659e-05	5.95263e-05	1.19335e-09	6.16496e-05	6.20194e-05	5.93789e-05	6.20554e-05	5.78249e-05	5.94779e-05	6.7348e-05	5.15866e-05	6.41877e-05	5.81322e-05	8.9312e-05	6.81562e-05	6.04979e-05	6.80902e-05	6.16611e-05	6.08371e-05
898	DGTS(2:0/20:2)	0.500687	568.456	258.277	1.3543e-06	1.17887e-06	1.29238e-08	7.71795e-07	1.47131e-09	1.92599e-07	4.17589e-08	6.81073e-07	1.18992e-09	1.24641e-09	7.5586e-07	1.79591e-07	5.09208e-07	2.87803e-08	5.45952e-07	4.371e-07	1.13383e-07	2.83894e-07	7.18007e-08	1.52207e-07	3.6575e-07	1.12875e-06	7.54327e-07	3.24866e-07	2.33568e-07	1.0545e-06	2.88308e-07	1.21998e-09	1.26413e-06	1.34107e-09	5.34902e-08	1.26938e-09	2.59806e-08	9.65056e-09	4.72784e-07	1.20899e-07	1.18155e-09	1.27249e-09	1.82086e-07	1.76886e-07	2.34091e-07	3.1653e-07	3.53856e-07	2.94693e-07	2.93494e-07
901	DGTS(2:0/24:4)	0.500687	620.436	69.9831	0.000143978	6.37894e-05	1.67421e-06	1.28133e-09	1.38533e-05	9.14054e-06	8.37791e-06	6.16901e-05	1.48083e-05	3.05527e-05	1.00435e-05	3.40151e-06	4.99847e-05	1.16209e-05	6.56058e-06	4.92226e-05	3.8337e-05	2.17144e-05	3.01165e-06	7.9208e-06	2.74842e-05	3.58297e-05	8.81644e-05	1.77956e-06	1.66778e-05	7.56682e-05	1.95756e-05	4.79426e-05	7.71276e-07	2.64521e-05	2.33173e-06	7.62875e-05	2.21929e-05	2.78644e-05	1.51147e-05	3.33433e-06	3.37014e-05	1.50936e-05	3.52937e-05	0.000112927	1.72523e-06	3.29364e-05	2.1325e-06	3.56063e-06	2.7293e-05
816	DGTS(8:0/8:0)	0.622996	488.385	87.974	7.29881e-06	1.6483e-06	6.6722e-08	2.86788e-06	6.13102e-07	3.92898e-06	2.87732e-06	1.94757e-06	5.6017e-07	1.63648e-06	4.17544e-07	2.84199e-07	1.32969e-06	2.55971e-06	2.96308e-06	1.77006e-06	1.25024e-06	2.08017e-06	3.45668e-07	7.07939e-07	1.85768e-06	1.76913e-06	2.34623e-06	2.26226e-07	6.4641e-07	2.41876e-06	1.02786e-06	2.10884e-06	1.4962e-07	4.69927e-07	1.56276e-07	1.81666e-06	3.14712e-06	1.44498e-06	1.30502e-06	1.32791e-06	1.49094e-06	1.84519e-06	9.09478e-07	3.10249e-06	1.81614e-06	1.47626e-06	6.36513e-07	6.08947e-07	3.60538e-07
13	FA(17:1)	1	267.233	121.993	1.21833e-05	1.04414e-05	4.50327e-06	6.26686e-06	9.48568e-06	5.34969e-06	3.52772e-06	1.10558e-05	7.56421e-06	2.43813e-06	1.06969e-05	7.53289e-06	1.02361e-05	7.65823e-06	1.00586e-05	6.69165e-06	5.53145e-06	1.14981e-05	3.86557e-06	9.07344e-06	7.78295e-06	8.40177e-06	7.69084e-06	7.49686e-06	7.47553e-06	7.92673e-06	9.75446e-06	5.70872e-06	1.03268e-05	3.85422e-06	6.72222e-06	4.59968e-06	5.22276e-06	6.74929e-06	6.12264e-06	7.17061e-06	6.43995e-06	2.41937e-06	8.80873e-06	7.91235e-06	1.03276e-05	7.05656e-06	6.87017e-06	7.46865e-06	7.059e-06
4	FA(18:0)	1	283.264	241.112	4.57478e-09	0.00012483	0.000103991	0.000112506	0.000106307	0.000130792	0.000150543	0.000123037	0.000107605	0.000123765	0.000146688	0.000119475	0.000133314	0.000140733	0.000142961	0.000132793	0.000126858	0.000120304	0.000123532	1.17511e-09	0.000113502	0.000141448	0.000142614	0.000118491	0.000120879	0.00013438	0.000137225	0.000120421	0.000114686	0.000123287	0.000114515	0.000100807	0.000120896	1.21068e-09	0.000119321	0.00011474	1.18155e-09	0.00016255	0.000124304	1.81728e-09	0.000114413	0.000106249	0.000119901	0.000132558	0.000137005
6	FA(18:1)	1	281.249	183.88	0.000159473	0.000125466	9.94545e-05	0.00013862	7.78495e-05	9.31974e-05	0.000105362	0.000151903	0.000169291	0.000176229	0.000188931	0.000226114	0.000208575	0.000142059	0.000241305	0.000221021	0.000165136	0.000155523	0.000177389	0.000252911	0.000163791	0.000112681	8.5281e-05	6.64162e-05	0.000128295	0.00017553	0.000134078	9.77308e-05	8.27352e-05	9.66931e-05	0.000125795	8.78064e-05	6.38583e-05	0.000191691	9.9555e-05	8.90148e-05	0.000179608	0.00011791	0.00015228	0.000119917	0.000130608	0.000116874	0.000134935	0.000154848	0.000152517
8	FA(19:1)	1	295.264	176.805	8.43466e-06	6.24439e-06	2.31259e-06	5.50275e-06	5.46502e-06	3.84679e-06	2.33202e-06	8.05858e-06	5.5956e-06	1.57935e-06	7.95884e-06	6.44596e-06	7.15397e-06	4.91499e-06	6.46616e-06	5.73529e-06	3.48046e-06	7.32067e-06	2.52451e-06	8.29954e-06	5.48361e-06	6.38534e-06	5.61051e-06	5.54289e-06	3.55775e-06	5.41352e-06	6.45754e-06	2.80676e-06	6.30264e-06	2.34313e-06	4.59813e-06	2.56407e-06	3.38273e-06	5.70153e-06	3.44283e-06	4.47486e-06	4.05022e-06	1.62982e-06	6.21477e-06	6.45316e-06	5.00501e-06	4.59686e-06	5.2136e-06	4.97287e-06	5.11029e-06
2	FA(20:0)	1	311.295	311.738	4.45749e-06	3.03697e-06	2.14502e-06	2.83645e-06	2.20618e-06	3.32239e-06	3.53641e-06	2.50912e-06	2.99335e-06	3.69629e-06	3.41128e-06	2.19552e-06	2.91784e-06	3.67431e-06	2.66927e-06	3.25686e-06	2.38761e-06	2.49678e-06	2.98141e-06	1.17511e-09	2.83659e-06	4.31339e-06	3.10377e-06	3.11652e-06	2.97157e-06	3.74897e-06	3.19194e-06	3.38995e-06	3.15605e-06	3.17638e-06	2.49569e-06	3.20006e-06	2.6868e-06	1.21068e-09	3.06241e-06	2.94114e-06	4.49596e-06	4.43733e-06	2.93345e-06	1.94354e-06	2.42001e-06	3.03931e-06	2.81672e-06	3.70613e-06	3.613e-06
3	FA(20:1)	1	309.28	248.732	4.63024e-06	4.68253e-06	4.49589e-06	4.21598e-06	2.82268e-06	4.43794e-06	3.55161e-06	6.02197e-06	5.80256e-06	5.99889e-06	7.38067e-06	7.05385e-06	4.80281e-06	4.57382e-06	5.65885e-06	5.48791e-06	4.53079e-06	4.37239e-06	4.54505e-06	1.17511e-09	4.75338e-06	4.52298e-06	2.85264e-06	2.95596e-06	3.98548e-06	7.00424e-06	4.92091e-06	4.31514e-06	3.0988e-06	3.84385e-06	3.70309e-06	3.05974e-06	1.30995e-06	1.21068e-09	5.20478e-06	3.17468e-06	5.50516e-06	4.34338e-06	4.64275e-06	3.03053e-06	4.70693e-06	3.80911e-06	4.77211e-06	5.4649e-06	5.21116e-06
5	FA(20:2)	1	307.264	197.141	8.13844e-06	1.04392e-05	3.56567e-06	1.15037e-05	8.1154e-06	1.10351e-05	9.55135e-06	1.17264e-05	1.02109e-05	1.46458e-05	1.228e-09	9.04316e-06	1.11753e-05	1.32778e-05	1.32825e-05	1.28537e-05	1.10198e-05	9.10717e-06	1.01959e-05	1.17511e-09	9.44449e-06	1.07943e-05	7.44599e-06	6.31882e-06	8.55745e-06	1.2299e-05	1.18648e-05	8.60457e-06	1.07797e-05	8.48065e-06	9.25259e-06	6.40067e-06	9.01408e-06	1.21068e-09	1.18744e-05	7.53789e-06	1.61766e-05	1.48018e-05	1.08583e-05	8.51398e-06	1.00399e-05	9.48084e-06	1.05807e-05	1.19222e-05	1.20353e-05
7	FA(20:3)	1	305.197	183.865	2.71198e-06	1.03108e-06	1.32584e-06	9.57502e-07	1.52201e-06	1.18256e-06	1.38905e-06	8.58783e-07	8.54898e-07	4.96536e-07	1.67923e-06	2.13062e-06	1.99936e-06	1.13128e-09	1.95585e-06	1.56603e-06	7.86013e-07	7.21886e-07	1.13187e-06	1.17511e-09	1.21517e-06	7.64862e-07	1.10783e-06	9.9861e-07	1.39993e-06	1.08605e-06	1.24168e-06	4.56366e-07	1.20574e-06	4.97919e-07	9.53354e-07	4.74317e-07	1.37575e-06	8.14648e-07	1.63157e-06	5.06168e-07	7.43627e-07	1.41859e-06	1.62833e-06	1.42395e-06	1.02471e-06	1.0377e-06	1.24247e-06	1.00827e-06	3.71488e-07
10	FA(20:4)	1	303.232	173.434	2.27585e-05	1.24833e-05	1.06589e-05	1.16594e-05	1.13781e-05	1.41383e-05	1.33789e-05	1.63111e-05	1.8561e-05	1.54277e-05	1.27491e-05	1.57571e-05	1.29373e-05	1.30581e-05	1.32527e-09	1.27075e-09	1.64911e-05	1.58616e-05	1.71534e-05	1.17511e-09	1.25383e-05	1.17692e-05	1.02936e-05	8.95049e-06	1.39997e-05	1.93923e-05	1.6251e-05	1.04565e-05	9.18778e-06	1.12477e-05	1.17472e-05	1.08554e-05	1.49527e-05	1.6e-05	1.23009e-05	1.0108e-05	1.18155e-09	1.30044e-05	1.23928e-05	1.36773e-05	1.30625e-05	1.19825e-05	1.56282e-05	1.50388e-05	2.1949e-05
9	FA(22:4)	1	331.264	175.217	6.94738e-05	9.88979e-05	9.85074e-05	9.01767e-05	5.80339e-05	9.36856e-05	0.000148341	0.000144914	0.000138281	0.000158749	0.000177605	0.000192287	0.000157429	0.000128628	0.000143477	9.35309e-05	0.000130321	0.000116551	0.000129689	1.17511e-09	0.000118429	7.6465e-05	6.61864e-05	7.15073e-05	0.000103287	0.000128039	8.90939e-05	8.48379e-05	7.50209e-05	9.89625e-05	9.08635e-05	7.55787e-05	0.00010407	0.000198723	9.11222e-05	6.97789e-05	0.000130233	0.00012014	0.000104478	8.09489e-05	7.94712e-05	9.69403e-05	0.00011362	0.000123851	0.000119957
11	FA(22:5)	1	329.248	173.002	8.44758e-07	7.75628e-07	6.94157e-07	9.05707e-07	7.49556e-07	5.49227e-07	1.30837e-09	1.51114e-06	1.18992e-09	1.24641e-09	1.228e-09	2.5813e-06	1.42029e-09	9.64732e-07	1.97899e-06	1.33807e-06	1.42618e-09	2.02303e-06	1.41054e-06	1.17511e-09	8.16791e-07	1.05723e-06	6.56843e-07	7.32085e-07	9.87911e-07	1.09847e-06	1.4079e-06	1.02722e-06	7.63454e-07	1.17772e-06	1.39968e-06	1.28929e-07	1.65039e-06	1.66579e-06	1.70149e-06	4.02215e-07	1.18155e-09	6.57343e-07	1.07156e-06	9.86714e-07	3.20418e-07	9.44727e-07	2.37495e-06	1.43977e-06	9.43847e-07
12	FA(22:6)	1	327.232	140.749	2.69468e-06	4.19693e-06	7.64301e-07	1.35254e-06	1.55073e-06	1.7136e-06	3.74608e-06	4.3838e-06	5.37617e-06	5.68757e-06	1.228e-09	4.93213e-06	3.6632e-06	4.66671e-06	4.7654e-06	3.81652e-06	3.32633e-06	3.07924e-06	3.47177e-06	5.27676e-06	3.42328e-06	2.53567e-06	1.9322e-06	3.26049e-06	2.42398e-06	3.32035e-06	3.43943e-06	2.45881e-06	2.19547e-06	1.92671e-06	4.1056e-06	1.26938e-09	2.77963e-06	5.62378e-06	3.76191e-06	2.0606e-06	4.84975e-06	4.23113e-06	5.19633e-06	1.81927e-06	2.98549e-06	3.04539e-06	2.96931e-06	3.72228e-06	3.711e-06
245	FAHFA(17:0/22:4)	0.948323	599.501	454.775	0.00110894	0.000270108	0.000222132	0.000218875	0.000241382	0.000288192	0.000169926	0.000239798	0.000257353	0.000224024	0.000227271	0.000300602	0.000288081	0.000185731	0.000295818	0.000283592	0.000302385	0.000333695	0.000295874	0.000213274	0.000298353	0.000203944	0.000269923	0.000129857	0.00028238	0.000272356	0.000305961	0.000170918	0.000160159	0.000227696	0.000166142	0.000237743	0.000210192	0.000174175	0.000177294	0.000219951	0.000162766	0.000159525	0.000231016	0.000376273	0.000302187	0.000222023	0.000183948	0.000189519	0.000183719
243	FAHFA(18:0/24:1)	0.948323	647.584	522.435	4.57478e-09	4.44179e-05	4.80328e-05	3.82603e-05	4.56725e-05	4.14544e-05	4.21083e-05	3.70699e-05	3.2055e-05	3.72841e-05	3.64744e-05	4.4879e-05	4.43891e-05	3.19559e-05	3.89639e-05	3.69811e-05	3.94625e-05	4.59087e-05	3.9132e-05	3.2751e-05	3.78629e-05	3.4174e-05	3.92962e-05	3.7526e-05	4.46644e-05	3.7077e-05	4.50711e-05	3.59127e-05	3.37152e-05	3.84243e-05	3.56523e-05	3.63875e-05	4.49256e-05	3.15479e-05	3.87887e-05	4.39182e-05	3.22721e-05	3.37762e-05	3.56963e-05	5.05226e-05	3.74703e-05	3.83409e-05	3.26514e-05	3.32102e-05	3.24909e-05
244	FAHFA(22:6/22:1)	0.948323	663.576	508.986	2.17217e-05	3.37388e-05	2.20711e-05	2.99052e-05	2.46606e-05	4.74782e-05	1.67214e-05	3.46111e-05	3.79884e-05	5.24913e-05	3.08666e-05	3.71922e-05	2.55845e-05	4.91102e-05	4.46018e-05	2.67618e-05	3.22919e-05	2.05602e-05	3.84602e-05	4.92786e-05	3.38048e-05	3.80322e-05	4.18649e-05	1.21265e-05	2.77654e-05	4.25482e-05	2.6441e-05	2.65272e-05	2.34771e-05	2.58199e-05	2.40359e-05	2.85165e-05	1.86637e-05	2.65933e-05	2.18257e-05	2.01185e-05	3.98471e-05	3.80376e-05	2.50662e-05	2.78354e-05	2.9809e-05	2.82476e-05	3.02263e-05	3.40105e-05	3.26791e-05
246	FAHFA(3:0/18:3)	0.948323	349.238	130.852	4.27183e-06	6.4373e-06	4.92903e-06	5.41149e-06	3.72766e-06	5.17236e-06	6.87484e-06	8.45071e-06	6.68623e-06	6.52791e-06	7.95887e-06	6.92637e-06	6.88665e-06	6.75898e-06	8.6697e-06	7.90254e-06	8.70847e-06	5.90784e-06	8.4871e-06	1.17511e-09	6.33485e-06	3.90301e-06	3.93034e-06	3.63479e-06	5.95835e-06	6.81486e-06	7.02844e-06	3.60612e-06	3.78145e-06	4.18044e-06	4.62458e-06	4.08768e-06	5.53938e-06	7.63612e-06	4.83638e-06	3.83997e-06	1.02807e-05	5.75846e-06	6.28333e-06	4.73962e-06	4.70273e-06	5.25834e-06	5.8291e-06	6.74095e-06	6.44216e-06
719	GlcADG(13:1/13:1)	0.7494	655.422	358.758	7.88361e-06	4.77355e-06	4.42396e-06	2.59334e-06	4.05477e-06	3.78416e-06	4.7312e-06	3.60999e-06	4.03586e-06	4.98373e-06	4.34451e-06	4.10692e-06	5.50878e-06	4.49042e-06	4.19563e-06	3.60148e-06	1.42618e-09	5.01582e-06	4.16935e-06	4.89553e-06	4.2602e-06	4.37617e-06	5.67367e-06	4.73804e-06	2.94365e-06	4.5606e-06	3.06856e-06	4.44681e-06	4.1434e-06	4.27307e-06	4.60204e-06	4.96345e-06	4.7957e-06	4.60264e-06	3.82273e-06	1.33743e-09	4.68422e-06	4.75051e-06	3.79904e-06	5.59385e-06	3.55781e-06	4.16986e-06	4.15323e-06	5.35012e-06	5.03565e-06
668	GlcADG(14:0/20:4)	0.79445	763.56	374.568	5.60906e-05	2.40904e-05	1.46536e-09	1.70227e-05	1.44514e-05	1.54978e-05	6.75373e-06	2.00823e-05	9.57038e-06	1.3055e-05	2.2401e-05	9.99525e-06	1.20163e-05	1.41609e-05	1.29024e-05	8.65588e-06	9.14167e-06	1.15318e-05	1.60133e-05	1.36295e-05	1.53532e-05	2.26337e-05	7.97854e-06	1.22216e-05	1.76914e-05	1.28533e-09	1.57167e-05	1.35083e-05	1.20286e-05	1.54223e-05	1.36786e-05	8.48306e-06	9.98227e-06	1.84295e-05	1.30522e-05	1.46716e-05	8.89638e-06	1.18514e-05	1.44469e-05	1.02081e-05	1.04486e-05	1.25676e-05	1.49116e-05	1.64439e-05	1.63738e-05
634	GlcADG(16:0/20:4)	0.818372	791.54	447.715	0.000234588	0.000328819	0.000384902	0.000162329	0.000260944	0.000361016	0.000490356	0.000452716	0.000434217	0.000498216	0.000411414	0.000389399	0.000319922	0.000500859	0.000470251	0.000269695	0.000391707	0.000260161	0.000320597	0.000460936	0.000370152	0.000404764	0.000390649	0.000581934	0.000303119	0.000275269	0.000300109	0.000369507	0.000459298	0.000289537	0.000617855	0.000380735	0.000358296	0.000500387	0.0005575	0.000428444	0.000524531	0.000492724	0.00057077	0.000191321	0.000342553	0.000416965	0.000380254	0.000400519	0.000410484
654	GlcADG(16:2/18:2)	0.800944	763.511	399.528	0.000173259	0.00016306	0.000173797	0.000159883	0.000177317	0.000196908	0.0002399	0.000237946	0.000309257	0.000263781	0.000223808	0.000218844	0.000186809	0.000284363	0.000227876	0.000200999	0.000332357	0.000151026	0.000192139	0.000302951	0.000220814	0.000375288	0.000210298	1.22256e-09	0.000210967	0.000282632	0.000197505	0.000233821	0.000243936	0.000201679	0.000250789	0.00026542	0.00017268	0.000266077	0.000223609	0.000270588	0.000267169	0.000351616	0.000396449	0.000169868	0.000202865	0.000239663	0.000237236	0.000269651	0.000222697
845	GlcADG(17:2/26:4)	0.573108	885.631	536.151	4.57478e-09	3.00712e-05	1.46536e-09	2.7653e-05	3.14352e-05	3.31505e-05	2.77713e-05	3.05274e-05	3.14058e-05	2.85048e-05	3.08993e-05	2.52984e-05	3.08596e-05	1.13128e-09	2.45491e-05	2.98433e-05	2.53367e-05	1.50377e-09	2.79743e-05	2.72299e-05	2.31259e-05	1.30829e-09	3.11922e-05	1.22256e-09	2.97169e-05	3.1079e-05	2.99823e-05	2.83532e-05	2.79274e-05	3.02695e-05	2.68962e-05	2.80613e-05	3.2667e-05	3.02018e-05	2.96647e-05	3.19967e-05	1.18155e-09	3.54948e-05	3.05667e-05	1.81728e-09	1.32969e-09	2.27038e-05	2.83662e-05	3.06446e-05	3.01217e-05
679	GlcADG(18:1/18:3)	0.775877	791.541	421.017	4.57478e-09	3.1337e-05	3.1001e-05	3.39111e-05	2.92616e-05	3.33198e-05	3.53793e-05	3.35568e-05	3.21378e-05	3.2556e-05	2.82404e-05	2.48414e-05	3.1188e-05	4.15493e-05	3.42088e-05	3.0111e-05	2.27243e-05	2.5084e-05	2.82087e-05	3.48057e-05	2.96713e-05	2.93188e-05	2.63334e-05	2.31791e-05	2.68925e-05	2.56114e-05	2.64055e-05	3.81597e-05	3.28738e-05	3.37629e-05	1.49867e-05	3.07149e-05	4.55014e-05	3.5527e-05	4.12508e-05	2.92367e-05	3.55357e-05	4.39169e-05	2.91627e-05	2.18664e-05	2.59602e-05	3.08098e-05	2.72181e-05	2.96176e-05	2.92969e-05
656	GlcADG(18:2/20:2)	0.799278	819.55	426.824	3.1678e-05	1.11203e-05	1.38206e-05	1.37764e-05	1.32683e-05	1.12657e-05	1.13111e-05	1.01405e-05	9.52248e-06	1.34567e-05	1.24308e-05	1.26869e-05	1.16358e-05	1.34317e-05	1.27597e-05	1.54748e-05	1.07454e-05	1.25887e-05	1.20869e-05	1.19729e-05	1.32587e-05	1.41585e-05	1.46758e-05	1.23249e-05	1.2702e-05	1.17275e-05	1.48958e-05	1.08836e-05	1.36253e-05	1.09584e-05	1.16491e-05	1.09074e-05	1.09083e-05	9.96234e-06	1.02047e-05	1.27957e-05	1.03982e-05	1.51968e-05	1.23497e-05	1.77932e-05	1.32241e-05	1.25671e-05	1.10269e-05	1.08619e-05	1.11203e-05
663	GlcADG(18:2/22:4)	0.796588	843.578	448.817	3.56156e-06	1.33755e-09	1.71372e-06	1.67415e-06	1.42555e-06	1.35098e-09	2.60543e-06	9.12959e-07	1.18992e-09	1.4896e-06	1.18549e-06	1.49885e-09	1.15141e-06	1.55052e-06	2.49808e-06	1.64964e-06	2.09922e-06	2.36486e-06	3.10629e-06	3.363e-06	1.61784e-06	1.30829e-09	9.53641e-07	1.93254e-06	1.43359e-09	1.81729e-06	1.65901e-06	1.21998e-09	2.04612e-06	2.46061e-06	2.48373e-06	1.43989e-06	2.02316e-06	3.85906e-06	1.99662e-06	1.266e-06	1.18155e-09	2.59178e-06	2.57561e-06	1.81728e-09	9.58364e-07	1.50352e-06	1.69515e-06	1.72379e-06	1.55291e-06
718	GlcADG(19:0/19:0)	0.7494	827.629	464.576	6.46596e-05	3.01117e-05	3.42313e-05	3.50071e-05	3.76939e-05	3.69156e-05	3.43767e-05	2.18209e-05	2.54373e-05	4.12318e-05	3.13857e-05	1.84071e-05	1.98946e-05	2.8528e-05	2.6985e-05	1.9329e-05	2.40445e-05	2.12595e-05	2.44427e-05	2.71226e-05	3.01442e-05	3.29209e-05	3.32748e-05	1.72635e-05	3.01596e-05	2.59073e-05	3.27618e-05	2.84729e-05	2.78915e-05	3.02265e-05	2.4673e-05	2.82949e-05	2.48196e-05	2.03583e-05	2.45848e-05	2.54787e-05	3.24134e-05	3.71123e-05	2.36981e-05	3.44528e-05	2.04754e-05	2.7762e-05	2.42243e-05	2.43135e-05	3.18428e-05
751	GlcADG(19:0/20:4)	0.719505	833.6	478.599	0.000110798	5.18443e-05	4.48914e-05	5.70623e-05	5.62369e-05	5.53065e-05	4.58573e-05	3.95211e-05	3.87103e-05	5.31757e-05	6.07952e-05	4.19806e-05	4.06762e-05	5.32578e-05	4.68529e-05	5.29851e-05	4.8732e-05	5.03628e-05	5.19966e-05	4.84474e-05	5.24745e-05	1.30829e-09	4.39639e-05	4.40107e-05	4.68234e-05	5.13394e-05	6.65343e-05	4.73285e-05	5.84953e-05	5.23782e-05	4.54429e-05	4.69673e-05	4.52075e-05	4.0521e-05	4.2713e-05	5.89569e-05	3.21587e-05	6.60386e-05	6.37957e-05	5.89017e-05	5.15772e-05	4.81578e-05	4.57583e-05	2.60669e-05	4.93454e-05
823	GlcADG(19:1/20:4)	0.6057	831.556	495.928	7.16892e-05	1.31332e-05	1.11227e-05	3.00457e-05	1.47131e-09	3.23615e-05	3.16887e-05	2.46141e-05	1.64965e-05	3.06441e-05	3.8508e-05	4.82833e-05	8.9836e-06	3.17766e-05	2.95798e-05	1.27075e-09	1.93316e-05	3.35562e-05	9.53844e-06	2.38015e-05	2.52579e-05	3.82724e-05	2.52893e-05	9.62858e-06	1.00516e-05	1.28533e-09	1.46205e-09	1.75041e-05	1.19335e-09	1.34107e-09	3.16857e-05	2.72794e-05	2.48635e-05	1.6542e-05	1.45705e-05	1.33743e-09	3.479e-05	3.97593e-05	3.48667e-05	3.02648e-05	2.53935e-05	1.90384e-05	2.84093e-05	2.79639e-05	2.68583e-05
844	GlcADG(19:2/26:4)	0.573108	913.66	581.265	4.57478e-09	0.000194198	0.000142054	0.000166769	0.000199016	0.000167302	0.000180943	0.00020255	0.000184941	0.000185149	0.000250715	0.000158048	0.000187912	0.000187733	0.00016481	0.000190084	0.000141678	0.000124811	0.000177213	0.000216197	0.000171106	0.000220435	0.00018854	0.000224736	0.000164827	0.000152089	0.000156157	0.000173423	0.000222645	0.000135911	0.000213542	0.000149542	0.0001686	0.000158974	0.000192466	0.000151704	0.000201933	0.000199732	0.000219958	0.000137586	0.000122768	0.000177778	0.000168839	0.000182228	0.000173099
716	GlcADG(20:0/20:0)	0.7494	855.661	513.884	0.00106459	0.000956524	0.000963214	0.000953779	0.000764612	0.00089361	0.000832265	0.000816412	0.000762104	0.00100709	0.000936975	0.000595441	0.000763834	0.000878529	0.000895253	0.000787796	0.000755221	0.000732269	0.000928185	0.00101847	0.000865309	0.000941242	0.000853035	0.000705991	0.000790354	0.000820449	0.000785654	0.000756265	0.000922505	0.000693817	0.000887931	0.000790952	0.000829683	0.000945809	0.000981275	0.000690172	0.00114309	0.00097838	0.000740028	0.000654182	0.000666552	0.000828868	0.000748688	0.000871975	0.000842098
717	GlcADG(20:5/20:5)	0.7494	835.578	505.64	8.35799e-07	2.56165e-06	1.69428e-06	1.7986e-06	2.64866e-06	1.49156e-06	2.49259e-06	1.1367e-06	7.19405e-07	1.89704e-06	2.05585e-06	1.47241e-06	1.61011e-06	2.21276e-06	2.9078e-06	1.52021e-06	1.97277e-06	2.76365e-06	2.28626e-06	2.05594e-06	1.9067e-06	2.81463e-06	2.20078e-06	3.26494e-06	2.22456e-06	1.3204e-06	1.93962e-06	2.95201e-06	2.83258e-06	1.70105e-06	2.16481e-06	1.39974e-06	2.53897e-06	1.90771e-06	2.42489e-06	2.37092e-06	3.20169e-06	3.09084e-06	2.37152e-06	7.8787e-07	2.79518e-06	2.31524e-06	1.7361e-06	1.95017e-06	2.3451e-06
843	GlcADG(21:2/26:4)	0.573108	941.692	628.29	3.6957e-05	3.72271e-05	2.3509e-05	2.69128e-05	3.34168e-05	3.3885e-05	3.01746e-05	3.33214e-05	2.89046e-05	3.36445e-05	3.32271e-05	2.52271e-05	1.8054e-05	3.61889e-05	3.76403e-05	2.6165e-05	2.73661e-05	1.41302e-05	3.20946e-05	3.46441e-05	3.01345e-05	4.80716e-05	4.43018e-05	3.52035e-05	3.76819e-05	2.85895e-05	4.62698e-05	3.58439e-05	4.32015e-05	2.70805e-05	3.77605e-05	2.87259e-05	3.25324e-05	2.26577e-05	3.23535e-05	3.39534e-05	4.73306e-05	3.71087e-05	4.03994e-05	2.26365e-05	2.20742e-05	3.51888e-05	3.26653e-05	3.35258e-05	2.87845e-05
715	GlcADG(22:3/22:3)	0.7494	899.647	590.32	7.7304e-05	4.08277e-05	3.05391e-05	4.77722e-05	4.07755e-05	1.35098e-09	3.89716e-05	3.54105e-05	4.19407e-05	3.89564e-05	3.32679e-05	3.42694e-05	3.47105e-05	3.8773e-05	3.19928e-05	3.11684e-05	4.18441e-05	3.66007e-05	3.61423e-05	3.62324e-05	3.7375e-05	4.52778e-05	4.47185e-05	4.27162e-05	4.18488e-05	4.49114e-05	2.66262e-05	3.93019e-05	3.92931e-05	3.6161e-05	3.8096e-05	3.76905e-05	3.5729e-05	1.21068e-09	3.0633e-05	5.01341e-05	3.45733e-05	1.27249e-09	3.90916e-05	4.65279e-05	3.3128e-05	3.5323e-05	3.08676e-05	3.64813e-05	3.48177e-05
104	GM3(d57:0)	0.983559	1476.06	481.874	4.57478e-09	2.09567e-06	1.13226e-06	1.41679e-06	2.24238e-06	1.44696e-06	1.75331e-06	1.67994e-06	1.61492e-06	1.47229e-06	1.64614e-06	1.23648e-06	1.81636e-06	1.54997e-06	1.79309e-06	1.50277e-06	1.29805e-06	1.80671e-06	2.09617e-06	1.17511e-09	1.4803e-06	1.8462e-06	1.48109e-06	2.10288e-06	1.50023e-06	1.59065e-06	1.63091e-06	2.09745e-06	1.2327e-06	6.35034e-07	2.4264e-06	1.39982e-06	1.07492e-06	2.11417e-06	1.54635e-06	1.5631e-06	1.96117e-06	1.84805e-06	8.2568e-07	1.81728e-09	1.9861e-06	1.54324e-06	1.49178e-06	1.51773e-06	1.38832e-06
725	HBMP(12:0/12:0/18:2)	0.74812	871.613	508.287	0.000194249	0.000113084	9.18284e-05	0.000117555	0.000106179	0.000105115	8.71398e-05	8.08528e-05	0.000113627	0.000116969	7.66277e-05	0.000102214	6.70749e-05	0.000112547	8.17053e-05	6.18957e-05	0.000102791	9.31849e-05	8.26665e-05	7.91412e-05	9.93224e-05	1.30829e-09	0.000115879	8.70517e-05	0.00014067	9.83536e-05	0.000117379	9.40974e-05	9.65463e-05	0.000114342	7.40839e-05	9.63726e-05	0.000113506	8.01713e-05	9.28646e-05	0.00011608	0.00011003	0.000139874	8.94602e-05	0.000144989	8.11959e-05	0.000100147	9.32121e-05	9.88674e-05	0.000100833
723	HBMP(12:0/12:0/20:3)	0.74812	897.629	515.319	4.57478e-09	0.000118243	0.000107816	8.57918e-05	0.000121726	9.83851e-05	0.000117031	0.000141696	0.000111057	9.39376e-05	9.11317e-05	0.000100959	0.000121102	0.000112258	9.1883e-05	9.02832e-05	9.64804e-05	8.98143e-05	0.000108055	0.000128447	0.000101305	0.00011808	0.000106283	0.000114754	0.000119383	8.9139e-05	8.96708e-05	0.000104612	0.000133627	0.000104428	9.86101e-05	9.15234e-05	0.000125368	0.000125935	0.000108214	0.000113196	0.000116786	0.000127939	9.29082e-05	0.000115369	7.65507e-05	0.000108619	9.71985e-05	9.42788e-05	0.000109965
721	HBMP(12:0/12:0/22:2)	0.74812	927.68	599.367	4.57478e-09	0.00097489	0.000788406	0.000821377	0.000941208	0.000850551	0.00089344	0.000956389	0.000817597	0.00103583	0.000982964	0.000679622	0.000990087	0.00105349	0.000912257	0.000900106	0.000885999	0.000829489	0.000808001	0.00112408	0.000862289	0.000982296	0.00100095	0.000972217	0.000999541	0.000858065	0.000899909	0.00107145	0.00108466	0.000805083	0.000992554	0.000858349	0.000969151	0.000910018	0.00109812	0.000910248	0.0009794	0.00104503	0.00101283	0.000778072	0.000785342	0.000950664	0.000874604	0.000918561	0.00087855
722	HBMP(12:0/12:0/22:3)	0.74812	925.661	590.378	4.57478e-09	4.98182e-05	4.95743e-05	4.09277e-05	4.01928e-05	3.84181e-05	4.5973e-05	4.50621e-05	4.55495e-05	3.61889e-05	4.05001e-05	4.14506e-05	4.40068e-05	3.56719e-05	4.12204e-05	3.88565e-05	4.32695e-05	4.53197e-05	4.33772e-05	4.80136e-05	4.06698e-05	4.26507e-05	3.79176e-05	3.99415e-05	3.79149e-05	3.87778e-05	3.80012e-05	3.46143e-05	3.85482e-05	3.85949e-05	4.43171e-05	3.6068e-05	4.76443e-05	1.21068e-09	4.74481e-05	3.63297e-05	4.38443e-05	4.31915e-05	3.47534e-05	4.44593e-05	3.79102e-05	3.81464e-05	3.7134e-05	3.72106e-05	4.10821e-05
724	HBMP(12:0/12:0/22:4)	0.74812	923.647	513.955	4.57478e-09	0.000229143	0.000239416	0.000215357	0.000184797	0.000204466	0.000203278	0.00018645	0.000161328	0.000219117	0.000218798	0.000153291	0.000176454	0.000184501	0.000220117	0.000175568	0.00018989	0.000178725	0.000218847	0.000226909	0.000189323	0.000202547	0.000195538	0.000170273	0.000184455	0.000180576	0.000188566	0.00017138	0.000201362	0.000168729	0.000208383	0.000190398	0.000197773	0.000193621	0.000220738	0.000175827	0.000226187	0.000204319	0.000161538	0.000161175	0.000163743	0.000188356	0.000164702	0.000191241	0.000179729
726	HBMP(14:0/16:4/16:4)	0.74812	915.597	398.525	4.57478e-09	1.33755e-09	8.34715e-06	1.28133e-09	7.56363e-06	6.66094e-06	6.52235e-06	4.57554e-06	4.94791e-06	5.28994e-06	7.23143e-06	8.18199e-06	1.42029e-09	5.16996e-06	5.34139e-06	5.37538e-06	1.42618e-09	6.78217e-06	5.8772e-06	5.36383e-06	4.66204e-06	6.15599e-06	7.63675e-06	6.04798e-06	5.09211e-06	6.18793e-06	7.21353e-06	6.85397e-06	5.72241e-06	1.34107e-09	6.32733e-06	5.45054e-06	6.31166e-06	6.24457e-06	6.67966e-06	8.29287e-06	6.00541e-06	6.89634e-06	4.95326e-06	9.21964e-06	5.09911e-06	6.11962e-06	7.17227e-06	6.79875e-06	6.14698e-06
896	HexCer/AP(t15:0/34:2)	0.513664	938.759	621.918	3.82198e-05	2.61694e-05	7.98203e-06	1.65244e-05	2.28442e-05	1.42926e-05	9.92939e-06	1.88983e-05	1.0877e-05	4.44757e-06	2.14665e-05	1.31593e-05	1.73778e-05	1.51455e-05	1.87059e-05	1.56351e-05	1.41107e-05	2.42388e-05	7.76092e-06	1.78327e-05	1.67809e-05	2.04338e-05	1.19242e-05	8.71325e-06	1.53275e-05	1.34886e-05	1.49361e-05	8.78086e-06	2.11668e-05	5.08929e-06	1.06529e-05	6.39924e-06	7.99516e-06	1.0888e-05	1.06293e-05	1.74019e-05	9.5334e-06	3.93575e-06	1.00021e-05	1.15942e-05	1.57227e-05	1.17308e-05	1.26614e-05	1.3791e-05	1.39209e-05
894	HexCer/AP(t15:0/36:2)	0.513664	966.791	645.075	3.68969e-05	1.95139e-05	6.12426e-06	1.59759e-05	1.69873e-05	1.41456e-05	8.0507e-06	1.69456e-05	1.047e-05	3.40849e-06	1.77266e-05	1.33535e-05	1.51746e-05	1.12452e-05	1.53209e-05	1.77087e-05	1.1532e-05	1.75208e-05	6.49927e-06	1.74696e-05	1.46035e-05	2.01736e-05	1.00199e-05	7.61883e-06	9.19661e-06	1.14795e-05	1.27513e-05	5.89294e-06	1.51944e-05	4.39161e-06	7.52104e-06	4.7119e-06	6.60826e-06	1.06487e-05	7.12608e-06	1.48704e-05	7.16396e-06	3.35173e-06	8.41005e-06	1.23108e-05	9.41753e-06	9.44295e-06	1.07397e-05	1.13473e-05	1.16441e-05
895	HexCer/AP(t15:1/36:2)	0.513664	964.771	625.326	2.68445e-05	1.37089e-05	5.1905e-06	1.19274e-05	1.16093e-05	9.08556e-06	6.53545e-06	1.01082e-05	5.76483e-06	2.64937e-06	1.19678e-05	6.90921e-06	8.78183e-06	7.75948e-06	1.00196e-05	9.06886e-06	6.85472e-06	1.07271e-05	4.99142e-06	1.01822e-05	9.5343e-06	1.30829e-09	6.56238e-06	4.56608e-06	6.95493e-06	7.66208e-06	9.45119e-06	4.04037e-06	1.0553e-05	3.23187e-06	5.75377e-06	3.37287e-06	4.53234e-06	6.17243e-06	6.50439e-06	9.44677e-06	5.8181e-06	2.36143e-06	5.77019e-06	8.63476e-06	7.38754e-06	5.93889e-06	7.60796e-06	8.07208e-06	8.21088e-06
886	HexCer/AP(t23:0/28:2)	0.528004	966.779	625.664	4.90484e-06	2.64142e-06	8.02877e-07	2.14791e-06	2.32725e-06	1.54059e-06	1.17793e-06	2.17309e-06	1.01203e-06	2.32443e-07	2.26005e-06	1.10454e-06	1.68217e-06	1.43439e-06	1.85392e-06	1.8563e-06	1.05632e-06	1.90028e-06	5.60095e-07	2.15092e-06	1.74097e-06	1.30829e-09	1.08011e-06	7.6524e-07	1.28149e-06	1.22803e-06	1.76276e-06	6.02573e-07	1.99586e-06	2.65824e-07	9.7139e-07	5.0946e-07	6.30187e-07	1.05831e-06	1.11375e-06	1.62536e-06	1.03835e-06	2.25512e-07	9.15849e-07	1.44075e-06	1.28352e-06	9.89781e-07	1.38777e-06	1.43258e-06	1.4621e-06
889	HexCer/AP(t26:0/12:0)	0.521309	848.667	706.782	4.12644e-05	1.30377e-05	1.04967e-05	8.06931e-06	1.75572e-05	1.51384e-05	1.34767e-05	1.35296e-05	1.01264e-05	7.14279e-06	8.15644e-06	8.65879e-06	6.76595e-06	8.92647e-06	1.12009e-05	8.95079e-06	1.41964e-05	9.06612e-06	1.35135e-05	1.24225e-05	1.25849e-05	1.22088e-05	1.6116e-05	1.77107e-05	1.88539e-05	9.10817e-06	1.58582e-05	8.94297e-06	1.69578e-05	6.18022e-06	1.42035e-05	6.66173e-06	1.58394e-05	1.12984e-05	1.07925e-05	8.88934e-06	1.05536e-05	1.16929e-05	1.26234e-05	6.73033e-06	1.22718e-05	1.21747e-05	8.25895e-06	7.7782e-06	8.06516e-06
863	HexCer/AP(t29:0/12:1)	0.55229	828.646	604.354	4.57478e-09	2.80766e-05	1.79592e-05	2.93949e-05	2.35359e-05	2.98582e-05	2.53526e-05	2.53244e-05	1.8365e-05	2.60507e-05	3.47182e-05	1.68934e-05	1.93918e-05	2.59982e-05	3.15861e-05	2.55982e-05	2.73014e-05	2.47469e-05	2.84147e-05	2.91963e-05	2.43884e-05	3.51973e-05	2.27795e-05	1.99397e-05	2.0637e-05	2.48201e-05	2.59596e-05	2.42925e-05	2.60137e-05	2.1295e-05	3.2751e-05	2.12955e-05	2.78875e-05	2.85444e-05	2.13092e-05	2.09763e-05	1.18155e-09	3.20971e-05	2.33161e-05	1.73404e-05	2.09452e-05	2.33699e-05	2.55573e-05	2.57293e-05	2.49265e-05
851	HexCer/NS(d14:1/24:2)	0.566912	750.583	421.088	0.000102662	3.57364e-05	4.2812e-05	1.28133e-09	3.82504e-05	3.7429e-05	3.16142e-05	3.26296e-05	2.5898e-05	2.9809e-05	3.32706e-05	2.90126e-05	3.38435e-05	2.67081e-05	3.23511e-05	2.50641e-05	4.32347e-05	4.2135e-05	3.6826e-05	2.4672e-05	3.5198e-05	4.48706e-05	3.26447e-05	2.15121e-05	3.37305e-05	1.28533e-09	2.82739e-05	3.46513e-05	2.90416e-05	4.50026e-05	3.51298e-05	2.71178e-05	2.66503e-05	2.35808e-05	3.59958e-05	3.61813e-05	1.18155e-09	3.77487e-05	2.7182e-05	4.81798e-05	3.21428e-05	2.99819e-05	1.79213e-05	3.50301e-05	3.25058e-05
852	HexCer/NS(d14:2/24:2)	0.566912	748.568	398.529	4.57478e-09	0.00143015	0.00144216	0.00162062	0.00141899	0.00141135	0.00136158	0.00132044	0.00133017	0.00117235	0.0014309	0.00119683	0.00124394	0.00127161	0.00128002	0.0013476	0.00132905	0.00144704	0.00129741	0.00133037	0.00128413	1.30829e-09	0.00130528	0.0012656	0.0013471	0.00137967	0.00144947	0.00132687	0.00132075	0.00141825	0.00131391	0.00131581	0.00118746	0.00130706	0.00139997	0.00131497	0.001519	0.00142572	0.0012585	0.00142575	0.00122172	0.00127514	0.00118924	0.00128724	0.00128943
850	HexCer/NS(d14:3/32:2)	0.566912	858.678	550.13	0.00148893	0.00102518	0.00125184	0.000990516	0.000630091	0.000694079	0.000901801	0.00102743	0.00119475	0.000922282	0.000910997	0.000755292	0.000772815	0.000853947	0.00103246	0.000859024	0.000691497	0.00106246	0.00076375	0.000967909	0.000939852	0.000811493	0.000865059	0.000913742	0.000766279	0.000851116	0.000674338	0.000649857	0.000634024	0.000809296	0.000933302	0.00077275	0.000529981	1.21068e-09	0.00118634	0.000588842	0.000918918	0.000756282	0.000665718	0.00070066	0.00076456	0.000739628	0.00080647	0.000826517	0.000865321
797	HexCer/NS(d15:3/24:2)	0.651214	760.558	388.83	4.82416e-05	1.65012e-05	1.46536e-09	2.50391e-05	1.40293e-05	1.75718e-05	1.68078e-05	1.33023e-09	1.17754e-05	1.55695e-05	1.5224e-05	1.76915e-05	2.51996e-05	1.95252e-05	1.62584e-05	1.79118e-05	1.73261e-05	1.6598e-05	1.96197e-05	1.39547e-05	1.72424e-05	2.0977e-05	1.26305e-05	2.46893e-05	1.28219e-05	1.28533e-09	1.24968e-05	1.98701e-05	1.54442e-05	1.73444e-05	1.71687e-05	1.3157e-05	1.56107e-05	1.25045e-05	1.51534e-05	1.55976e-05	1.37309e-05	1.71296e-05	1.88741e-05	2.5599e-05	1.40665e-05	1.57434e-05	1.75011e-05	2.03101e-05	2.1155e-05
300	HexCer/NS(d18:1/16:0)	0.937473	700.572	402.849	6.69463e-05	2.09239e-05	2.61024e-05	3.36848e-05	1.65501e-05	2.00096e-05	2.58972e-05	2.37386e-05	1.63266e-05	1.64183e-05	1.26457e-05	3.99191e-05	3.94357e-05	1.81382e-05	2.13812e-05	3.20601e-05	3.09375e-05	2.4474e-05	2.53945e-05	1.7013e-05	2.63998e-05	2.83987e-05	1.76578e-05	1.77859e-05	1.69767e-05	2.61301e-05	1.98196e-05	2.24838e-05	1.96029e-05	2.16655e-05	2.09754e-05	2.06054e-05	1.4152e-05	1.18274e-05	1.79672e-05	1.80562e-05	2.38594e-05	2.04592e-05	2.37288e-05	1.81728e-09	2.73349e-05	1.94744e-05	2.64905e-05	2.18245e-05	1.80412e-05
657	HexCer/NS(d18:1/22:0)	0.798938	828.658	531.744	0.000135455	3.16101e-05	3.30345e-05	6.09352e-05	3.7127e-05	5.27496e-05	4.02137e-05	4.52869e-05	3.36667e-05	4.35497e-05	3.24028e-05	4.66967e-05	6.95921e-05	4.9148e-05	2.99731e-05	5.48122e-05	3.88301e-05	3.59007e-05	4.08775e-05	3.7604e-05	4.74733e-05	6.82072e-05	3.61511e-05	4.374e-05	3.3586e-05	4.74791e-05	3.65438e-05	5.36611e-05	4.08875e-05	4.32784e-05	3.4984e-05	2.76688e-05	3.37904e-05	2.19888e-05	2.91017e-05	4.26217e-05	4.62906e-05	4.55472e-05	4.74204e-05	2.67427e-05	3.66008e-05	3.98146e-05	4.19104e-05	4.45825e-05	4.62832e-05
308	HexCer/NS(d18:1/24:0)	0.935215	812.66	561.751	5.57098e-05	7.80013e-06	4.79771e-06	7.63417e-06	1.67197e-05	6.32015e-06	9.05185e-06	3.78632e-06	6.17641e-06	4.1916e-06	1.72415e-05	6.09933e-06	1.42029e-09	1.21098e-05	4.65463e-06	3.36531e-06	7.84849e-06	4.85698e-06	2.30646e-05	3.25821e-06	1.02344e-05	1.03243e-05	1.64529e-05	1.07308e-05	1.23538e-05	7.06722e-06	4.95999e-06	9.21288e-06	1.25975e-05	1.0166e-05	5.89349e-06	5.64469e-06	1.0282e-05	1.73261e-05	1.2375e-05	1.06429e-05	1.24354e-05	8.05299e-06	8.2295e-06	2.58856e-05	6.99409e-06	1.08814e-05	8.65097e-06	8.19139e-06	6.13125e-06
729	HexCer/NS(d18:1/24:2)	0.747937	852.654	500.249	2.24782e-05	1.19008e-05	1.31958e-05	1.3768e-05	9.30426e-06	1.17134e-05	1.23611e-05	1.33206e-05	7.18862e-06	1.11328e-05	1.24454e-05	1.13093e-05	1.36479e-05	1.11703e-05	9.66595e-06	1.06381e-05	1.12369e-05	1.01547e-05	1.28374e-05	8.52956e-06	1.19e-05	1.36181e-05	8.89598e-06	1.1387e-05	8.1178e-06	9.83166e-06	9.38263e-06	1.00049e-05	9.36006e-06	8.81298e-06	1.02229e-05	5.93404e-06	8.37641e-06	7.36545e-06	8.9602e-06	8.71848e-06	1.13701e-05	1.14105e-05	9.82588e-06	1.24106e-05	1.10557e-05	9.75307e-06	9.59881e-06	1.11084e-05	1.13408e-05
803	HexCer/NS(d22:2/18:2)	0.641494	776.597	454.673	0.000474626	0.00016748	0.000145244	0.000224605	0.000192613	0.000203141	0.000158517	0.00012927	0.0002293	0.000197609	0.00013866	0.000165642	0.000115398	0.000188365	0.000124027	0.000122016	0.000185769	0.0001564	0.000154886	0.000136791	0.000180518	1.30829e-09	0.000201335	0.000139397	0.000202648	0.000162707	0.000215003	0.000163919	0.000162828	0.000194486	0.000120836	0.000163924	0.000165888	0.000131975	0.000125804	0.000201413	1.18155e-09	0.000216067	0.00017043	0.000275212	0.000128199	0.000157104	0.000157042	0.000168782	0.000172254
728	HexCer/NS(d25:1/16:0)	0.748037	842.672	549.554	2.53214e-05	1.06677e-05	1.05353e-05	1.28133e-09	1.26375e-05	1.36003e-05	1.26887e-05	1.24373e-05	8.7957e-06	1.29311e-05	1.08291e-05	1.51373e-05	2.12509e-05	1.32938e-05	8.29132e-06	2.0047e-05	9.25802e-06	1.06112e-05	1.19944e-05	1.13951e-05	1.25862e-05	1.8051e-05	9.77373e-06	1.24797e-05	8.49958e-06	1.51216e-05	1.03429e-05	1.42242e-05	1.28076e-05	1.36946e-05	1.22229e-05	9.12776e-06	1.04722e-05	6.28125e-06	9.89515e-06	1.13353e-05	1.39026e-05	1.41649e-05	1.51913e-05	1.70294e-05	9.66264e-06	1.2214e-05	1.26207e-05	1.21932e-05	1.291e-05
699	HexCer/NS(d26:1/29:1)	0.757822	992.749	733.136	1.01402e-05	2.01773e-06	3.32491e-06	3.99908e-06	1.95339e-06	1.83425e-06	1.59025e-06	1.0695e-06	2.36153e-06	4.26961e-06	2.37404e-06	3.30822e-06	2.4785e-06	2.27697e-06	5.47223e-07	2.40337e-06	2.14547e-06	3.54e-06	2.19088e-06	1.37926e-06	2.76022e-06	4.04115e-06	1.76063e-06	1.67545e-06	3.16252e-06	2.41988e-06	3.73061e-07	2.53382e-06	1.88782e-06	4.27511e-06	1.10997e-06	2.18398e-06	1.30536e-06	1.61626e-06	8.55404e-07	4.08332e-06	1.91729e-06	2.00338e-06	1.6879e-06	3.9719e-06	2.43083e-06	2.26475e-06	2.55148e-06	2.68647e-06	2.61226e-06
96	LPC(16:0)	0.986744	540.331	97.4049	0.000137245	0.00020687	0.000150298	0.000136862	0.000156387	0.000244529	0.000237495	0.000342824	0.000343396	0.000204889	0.000357979	0.000145048	0.000247868	0.000267726	0.000314655	1.27075e-09	0.000258507	0.000218061	0.00028372	1.17511e-09	0.000212718	0.000203476	0.000152435	0.000183964	0.000113891	0.000282495	0.000149763	0.000283353	0.000275545	0.000186997	0.000265935	0.000251066	0.00027051	0.000237162	0.000303268	0.00020993	1.18155e-09	0.000191681	0.000326565	0.000105091	0.000222733	0.000210793	0.000232485	0.000268657	0.000272038
192	LPC(17:0)	0.96151	510.354	113.92	3.65694e-06	7.83633e-06	5.561e-06	4.38812e-06	7.53819e-06	1.0176e-05	7.59141e-06	1.19241e-05	1.18869e-05	7.14343e-06	9.64429e-06	5.36372e-06	8.67383e-06	4.25808e-06	1.02462e-05	1.27075e-09	8.72288e-06	5.79673e-06	1.08039e-05	1.23803e-05	7.67968e-06	1.11546e-05	5.63848e-06	7.61308e-06	4.06491e-06	1.18756e-05	6.68046e-06	6.65813e-06	7.09882e-06	7.12806e-06	7.57339e-06	7.22461e-06	1.12384e-05	5.99829e-06	1.08065e-05	5.84313e-06	1.18155e-09	4.95742e-06	1.2659e-05	3.7213e-06	6.78769e-06	7.23615e-06	8.50943e-06	7.89158e-06	8.46969e-06
203	LPC(18:0)	0.958976	568.326	102.775	7.34143e-06	9.4185e-07	7.38899e-07	3.73107e-07	2.90872e-07	8.06343e-07	8.39386e-07	1.80551e-06	1.79843e-06	1.12116e-06	1.84627e-06	2.78719e-07	1.3156e-06	1.4501e-06	1.65379e-06	2.20881e-06	1.20396e-06	6.69305e-07	1.81619e-06	2.60693e-06	1.55533e-06	7.27027e-07	6.58889e-07	5.56037e-07	3.49599e-07	1.19494e-06	7.25379e-07	1.67444e-06	8.34868e-07	1.02907e-06	1.27029e-06	1.1727e-06	1.474e-06	1.3705e-06	2.15219e-06	8.35505e-07	1.18155e-09	9.99178e-07	1.94507e-06	1.54693e-07	1.02343e-06	1.00745e-06	9.49067e-07	1.10036e-06	1.25294e-06
89	LPC(18:1)	0.989332	566.336	80.6019	2.06349e-06	2.12194e-06	2.88528e-07	2.00866e-06	2.09541e-06	5.32693e-07	1.68772e-06	1.5785e-06	2.22505e-06	2.61048e-06	3.4888e-06	4.89661e-08	1.2759e-06	2.49897e-06	2.01747e-06	3.86201e-06	6.51547e-07	1.14831e-06	1.99904e-06	2.85181e-06	1.85276e-06	1.14475e-06	5.47168e-07	3.53921e-07	1.15948e-06	8.07802e-07	8.51406e-07	2.95338e-06	1.13936e-06	8.20575e-07	2.32001e-06	1.82648e-06	2.39346e-06	1.75496e-06	2.88945e-06	9.52328e-07	1.18155e-09	2.28406e-06	2.76335e-06	2.25339e-07	1.23958e-06	1.4214e-06	1.74761e-06	1.91932e-06	1.8711e-06
132	LPC(18:2)	0.978541	520.34	79.8932	5.50562e-05	7.15319e-05	5.17557e-05	5.99479e-05	5.41461e-05	9.17528e-05	0.000102885	0.00012304	0.000121862	0.000124344	0.000192877	4.17833e-05	8.98251e-05	0.000138109	0.000119431	1.27075e-09	7.98777e-05	7.57359e-05	0.000112378	0.000184	9.4517e-05	0.000101601	6.55511e-05	6.62375e-05	3.06021e-05	6.78935e-05	6.86246e-05	0.000145525	0.00012211	8.5568e-05	0.000130931	0.000101856	0.000126751	8.94879e-05	0.000154073	8.7031e-05	1.18155e-09	0.000126176	0.000152982	3.95255e-05	8.86405e-05	9.25584e-05	0.000105882	0.000109625	0.000104895
127	LPC(20:3)	0.979398	590.346	84.5827	4.85779e-06	7.47979e-06	2.96612e-06	4.49737e-06	6.74065e-06	3.98453e-06	1.13083e-05	1.22783e-05	1.33756e-05	7.35936e-06	1.33992e-05	5.31136e-06	1.2573e-05	1.54447e-05	9.83505e-06	1.52842e-05	6.84901e-06	7.87074e-06	9.0838e-06	1.15252e-05	9.1012e-06	7.30805e-06	7.75227e-06	9.5004e-06	3.95356e-06	7.33078e-06	4.67135e-06	1.66514e-05	8.96164e-06	6.79849e-06	1.44386e-05	8.55697e-06	1.26915e-05	7.52648e-06	1.87419e-05	8.16695e-06	1.67139e-05	8.57166e-06	1.5126e-05	3.29238e-06	7.48266e-06	9.71184e-06	8.56104e-06	1.2369e-05	9.11359e-06
589	LPC(20:4)	0.848476	588.331	75.5024	2.93103e-05	3.86409e-05	2.49876e-05	2.58898e-05	3.0328e-05	4.01448e-05	4.00267e-05	5.47563e-05	5.79652e-05	3.40957e-05	7.33628e-05	2.79915e-05	4.12791e-05	4.37321e-05	5.09707e-05	5.5457e-05	3.06175e-05	4.18883e-05	3.37135e-05	5.70653e-05	4.16112e-05	3.75256e-05	3.34908e-05	4.28696e-05	1.83847e-05	4.1517e-05	2.78939e-05	6.12898e-05	4.91567e-05	3.33935e-05	6.46759e-05	2.28765e-05	5.31619e-05	4.62458e-05	6.30786e-05	3.50683e-05	6.74223e-05	2.82512e-05	5.06064e-05	2.28742e-05	3.12921e-05	4.15537e-05	4.04535e-05	4.339e-05	4.42139e-05
580	LPC(22:6)	0.857672	568.264	50.4901	4.57478e-09	8.04341e-08	5.92987e-08	1.20542e-07	2.73442e-08	1.20851e-07	1.09131e-07	1.05642e-07	1.77254e-07	7.06357e-08	1.1845e-07	1.49885e-09	4.92716e-08	1.90889e-07	5.74275e-08	2.12662e-07	2.2804e-07	4.46288e-08	1.71759e-08	1.22463e-07	9.59108e-08	1.14416e-07	1.40393e-09	1.22256e-09	2.49635e-08	1.24698e-07	3.45878e-08	6.62868e-08	1.7931e-07	5.07487e-08	1.19971e-09	7.36587e-08	8.20479e-08	1.31512e-07	5.43839e-08	1.0103e-07	1.18155e-09	6.35667e-08	1.2558e-07	1.81728e-09	2.69872e-08	6.30302e-08	1.49081e-07	1.58078e-07	1.72787e-07
20	LPE(16:0)	0.999854	454.293	92.9822	7.50647e-05	9.36805e-05	5.0779e-05	6.39093e-05	6.34762e-05	7.71166e-05	6.4841e-05	9.66658e-05	7.75061e-05	5.03742e-05	9.55627e-05	4.5761e-05	7.60549e-05	6.77325e-05	9.50326e-05	0.000125318	6.95524e-05	6.28654e-05	7.81142e-05	1.17511e-09	7.14704e-05	6.17262e-05	6.75238e-05	4.92714e-05	6.31904e-05	8.78227e-05	6.15971e-05	5.98598e-05	7.81728e-05	4.45515e-05	6.26369e-05	6.62448e-05	8.06472e-05	7.53018e-05	8.64569e-05	5.51724e-05	0.000106019	5.84953e-05	9.09107e-05	3.54847e-05	7.46502e-05	6.82868e-05	7.53672e-05	6.89973e-05	7.5212e-05
143	LPE(18:0)	0.975688	482.361	117.471	8.65275e-06	6.26274e-06	5.01543e-06	4.08535e-06	8.42606e-06	7.21177e-06	8.22183e-06	8.49325e-06	6.54881e-06	7.52927e-06	1.33766e-05	3.0769e-06	8.83935e-06	8.17759e-06	1.22133e-05	1.15729e-05	8.17584e-06	8.95971e-06	1.09355e-05	1.32408e-05	8.45079e-06	9.70366e-06	4.42208e-06	1.83734e-05	4.45029e-06	6.87516e-06	3.68112e-06	1.09605e-05	1.14763e-05	5.22059e-06	1.06821e-05	3.60216e-06	9.10824e-06	9.9854e-06	1.16464e-05	7.62121e-06	1.18155e-09	8.08188e-06	1.60407e-05	1.91069e-06	7.62645e-06	8.07347e-06	9.66863e-06	9.01846e-06	8.83173e-06
48	LPE(18:1)	0.998057	480.298	77.9189	3.23389e-07	5.78932e-07	6.20479e-08	3.77803e-07	5.10444e-07	6.95952e-07	4.75146e-07	9.15107e-07	2.48288e-07	6.95574e-07	1.21676e-06	2.94521e-07	4.19845e-07	8.12248e-07	6.14022e-07	1.27075e-09	3.30185e-07	3.45068e-07	4.76063e-07	1.17511e-09	4.69692e-07	1.1491e-06	4.88707e-07	3.57513e-07	1.79048e-07	3.40095e-07	7.1804e-07	4.51117e-07	1.2165e-06	3.0356e-07	5.55421e-07	3.95569e-07	4.54188e-07	4.00151e-07	6.9238e-07	4.18975e-07	1.18155e-09	7.37376e-07	8.00719e-07	3.79601e-07	2.68856e-07	5.15405e-07	6.55462e-07	3.99277e-07	5.33402e-07
22	LPE(18:2)	0.999854	478.292	77.6529	4.57478e-09	2.96133e-05	1.51228e-05	3.03828e-05	2.9518e-05	3.25963e-05	2.954e-05	3.61832e-05	2.49382e-05	2.75125e-05	1.228e-09	1.49885e-09	2.72003e-05	3.6934e-05	3.41481e-05	1.27075e-09	2.19665e-05	2.43945e-05	2.6607e-05	4.27966e-05	2.34731e-05	3.92771e-05	2.63959e-05	2.3915e-05	1.90384e-05	2.33285e-05	2.88824e-05	2.68432e-05	4.2369e-05	1.82602e-05	2.97314e-05	2.48483e-05	2.96644e-05	2.70435e-05	3.72256e-05	2.81877e-05	1.18155e-09	3.04286e-05	3.7723e-05	1.81728e-09	2.69039e-05	2.60035e-05	2.95865e-05	3.04271e-05	2.87453e-05
19	LPE(20:3)	0.999854	504.323	100.063	1.19891e-05	3.02622e-06	3.75837e-06	3.50547e-06	3.49824e-06	3.33236e-06	3.10588e-06	2.94544e-06	2.33214e-06	2.99636e-06	2.80013e-06	4.32058e-06	3.72158e-06	2.96345e-06	2.96835e-06	2.48111e-06	3.6718e-06	3.38898e-06	3.20174e-06	2.71101e-06	3.63591e-06	2.87146e-06	3.1493e-06	2.78859e-06	3.37604e-06	3.18631e-06	3.27244e-06	3.00432e-06	2.84003e-06	3.44953e-06	2.45486e-06	3.025e-06	3.16017e-06	2.50232e-06	2.48177e-06	3.46378e-06	2.69448e-06	3.42129e-06	2.59187e-06	4.89104e-06	3.3245e-06	3.09745e-06	3.27944e-06	3.03122e-06	2.83783e-06
57	LPE(20:4)	0.996278	502.293	75.1279	0.000334492	0.00029029	0.000106262	0.000277403	0.000305571	0.000267849	0.000184314	0.000351121	0.000204678	0.000104528	0.000360175	0.000186359	0.000263764	0.00020433	0.000298814	0.00029871	0.000185609	0.000247159	7.79765e-05	0.000337723	0.000244356	0.00017777	0.00027045	0.000283652	0.000177945	0.000324695	0.000283475	0.00018617	0.000390282	0.000136145	0.000249095	0.000178074	0.000228185	0.00027665	0.000265669	0.000264566	0.000262828	0.000127454	0.000248752	0.000186854	0.000252844	0.000238578	0.000251222	0.000244699	0.000241394
327	LPE(22:4)	0.921578	528.361	124.17	1.667e-07	1.33755e-09	1.8554e-08	1.45883e-07	1.84741e-07	4.2307e-08	1.30837e-09	1.26396e-07	2.84173e-08	2.01319e-08	8.15645e-08	5.33441e-08	3.4958e-08	6.07492e-08	1.11758e-07	6.52021e-08	6.53696e-08	1.18173e-07	2.03142e-08	4.69155e-08	6.97062e-08	1.77752e-07	9.43767e-08	9.40703e-08	6.78247e-08	7.33417e-08	1.28104e-07	4.86115e-08	1.19335e-09	8.32254e-09	8.28465e-08	2.59951e-08	3.60342e-08	2.2433e-08	1.29905e-09	9.20334e-08	1.46471e-07	2.10057e-08	8.6657e-08	6.25139e-08	8.0846e-08	6.75866e-08	2.86191e-08	6.4448e-08	1.07207e-07
21	LPE(22:5)	0.999854	528.308	79.5879	4.99283e-05	4.25319e-05	1.02553e-05	4.29646e-05	4.43454e-05	4.99162e-05	3.02971e-05	4.56046e-05	3.27045e-05	1.40325e-05	3.02747e-05	2.61391e-05	5.4773e-05	2.93882e-05	2.90821e-05	4.77362e-05	2.62341e-05	4.56921e-05	1.782e-05	4.86531e-05	3.59187e-05	5.1193e-05	4.25384e-05	2.28705e-05	3.55843e-05	4.35216e-05	3.5672e-05	2.84101e-05	4.64274e-05	2.3279e-05	3.13421e-05	2.62099e-05	4.81369e-05	3.52873e-05	4.22584e-05	3.35543e-05	2.94661e-05	1.44572e-05	3.63178e-05	2.467e-05	3.42096e-05	3.42703e-05	3.48613e-05	3.59653e-05	3.47565e-05
23	LPE(22:6)	0.999854	526.292	51.0649	1.59615e-06	2.68426e-06	1.8534e-06	1.0461e-06	1.58873e-06	3.56509e-06	3.00744e-06	5.44874e-06	4.31283e-06	9.11561e-07	5.0013e-06	3.76255e-06	4.33451e-06	1.83387e-06	6.32036e-06	5.03233e-06	1.07497e-06	2.31888e-06	1.76536e-06	2.9301e-06	3.01943e-06	2.87145e-06	3.14969e-06	3.37719e-06	2.15832e-06	2.34097e-06	2.62458e-06	9.70706e-07	3.72992e-06	1.91708e-06	4.09499e-06	3.43365e-06	3.37736e-06	3.41515e-06	5.41399e-06	4.03778e-06	2.70317e-06	7.64e-07	4.92192e-06	9.68424e-07	4.04967e-06	3.016e-06	2.3419e-07	1.68013e-07	1.1179e-07
231	LPG(18:1)	0.952463	509.289	50.4538	1.23096e-06	5.82412e-07	2.51374e-06	5.72248e-06	3.94711e-06	5.63695e-07	3.89315e-06	3.84375e-06	8.06303e-06	5.1374e-06	5.59116e-06	1.91278e-06	3.4911e-06	4.84119e-06	4.69337e-06	6.61763e-06	2.47042e-06	3.129e-06	4.30488e-06	6.49513e-06	3.95222e-06	7.47814e-06	3.82198e-06	9.03625e-06	1.89653e-06	5.9453e-06	3.61429e-06	5.40797e-06	4.90039e-06	2.61797e-06	7.26245e-06	5.39814e-06	2.80635e-06	5.32887e-06	3.96375e-06	3.38131e-06	8.90279e-06	4.25656e-07	6.5622e-06	4.68962e-07	2.44216e-06	4.58307e-06	2.86749e-06	2.44336e-06	1.66907e-06
307	LPI(16:0)	0.935264	571.287	66.4396	1.22326e-06	8.08594e-06	2.74796e-06	4.10786e-06	3.13986e-06	3.3902e-06	3.52004e-06	3.90505e-06	3.76905e-06	3.3301e-06	4.93263e-06	1.8174e-06	3.22398e-06	4.84542e-06	3.48776e-06	1.27075e-09	2.45905e-06	2.16976e-06	3.46407e-06	6.91669e-06	3.52687e-06	4.53256e-06	3.19314e-06	3.62695e-06	2.22064e-06	4.73421e-06	2.59998e-06	4.85e-06	5.04872e-06	3.05794e-06	5.46324e-06	3.99265e-06	2.5147e-06	6.36218e-06	3.85974e-06	3.19715e-06	1.18155e-09	4.50838e-06	3.50837e-06	1.36155e-06	2.85961e-06	3.57464e-06	4.0734e-06	4.60668e-06	4.80984e-06
346	LPI(18:0)	0.912935	599.32	81.9081	1.13834e-05	2.06439e-05	9.74719e-06	1.3203e-05	1.14628e-05	1.06863e-05	1.73077e-05	2.27283e-05	1.13789e-05	1.25292e-05	1.67209e-05	1.43346e-05	1.15102e-05	1.45684e-05	2.09288e-05	2.35395e-05	8.72709e-06	8.24433e-06	1.37541e-05	2.91855e-06	1.38159e-05	1.80436e-05	9.92995e-06	3.14198e-06	7.27627e-06	1.48376e-05	1.05175e-05	1.52724e-05	1.44934e-05	3.04883e-06	1.78305e-05	1.21812e-05	9.08956e-06	1.6861e-05	1.16433e-05	1.13708e-05	2.21772e-05	1.62805e-05	2.50065e-05	1.1809e-05	8.75762e-06	1.29784e-05	1.04923e-05	1.25e-05	3.69327e-06
637	LPI(20:4)	0.816251	619.289	51.1679	1.2821e-06	6.63121e-06	5.28343e-06	8.09008e-06	5.70052e-06	1.11699e-05	1.41407e-05	7.93714e-06	1.63877e-05	1.17946e-05	1.73547e-05	3.69569e-06	6.88579e-06	1.49032e-05	9.88364e-06	1.89221e-05	5.52453e-06	5.95037e-06	1.02731e-05	1.56046e-05	9.87075e-06	9.62383e-06	6.86574e-06	1.83143e-05	3.30914e-06	3.89934e-06	6.5208e-06	1.34317e-05	1.02388e-05	7.77574e-06	1.92001e-05	1.22508e-05	8.12279e-06	1.93524e-05	1.08686e-05	7.92867e-06	1.18155e-09	1.81083e-05	1.23543e-05	2.2673e-06	4.98751e-06	9.77106e-06	1.0813e-05	1.16949e-05	1.17583e-05
792	LPS(18:1)	0.655355	522.32	105.33	7.86932e-07	1.05262e-06	1.49168e-07	5.47532e-07	1.16661e-06	3.99039e-07	7.82683e-07	9.47006e-07	2.59017e-07	1.55032e-07	8.48907e-07	4.25271e-07	3.74203e-07	5.62478e-07	8.14152e-07	5.36334e-07	5.96179e-07	8.10827e-07	1.33865e-07	5.59728e-07	5.95379e-07	8.1281e-07	7.33609e-07	5.19321e-07	4.61956e-07	9.68684e-07	1.09662e-06	1.24368e-07	8.5667e-07	1.62655e-07	3.52685e-07	4.62496e-07	4.00381e-07	3.02983e-07	8.72901e-08	6.67167e-07	2.77044e-07	1.13987e-07	7.14447e-07	5.22418e-07	9.42163e-07	5.28988e-07	6.41251e-07	6.08322e-07	3.02632e-07
676	MGDG(13:0/18:0)	0.782395	761.553	403.674	3.62678e-05	5.16485e-06	8.53108e-06	1.28133e-09	5.67608e-06	6.90104e-06	7.88955e-06	8.03799e-06	4.45912e-06	4.63234e-06	4.95048e-06	1.06288e-05	1.16906e-05	3.92802e-06	5.63508e-06	7.79451e-06	8.61299e-06	7.57845e-06	7.42197e-06	4.34293e-06	8.00725e-06	7.3663e-06	5.25659e-06	5.36811e-06	5.97883e-06	7.64659e-06	5.66407e-06	6.56582e-06	5.5427e-06	7.20323e-06	6.20064e-06	5.16187e-06	5.65173e-06	2.78302e-06	4.56228e-06	5.25831e-06	4.47304e-06	5.08169e-06	5.53409e-06	1.81728e-09	6.88929e-06	5.4095e-06	6.52589e-06	6.52965e-06	6.09136e-06
891	MGDG(14:1/18:1)	0.519202	771.516	300.689	3.59529e-05	3.76503e-05	3.14508e-05	1.28133e-09	3.4359e-05	3.71177e-05	2.68829e-05	2.32227e-05	2.30811e-05	3.27488e-05	3.26507e-05	1.24254e-05	1.79362e-05	1.79073e-05	2.28078e-05	3.70494e-05	1.81324e-05	2.49879e-05	2.67821e-05	5.11462e-05	2.72146e-05	5.0762e-05	2.53871e-05	2.5305e-05	2.46716e-05	2.8243e-05	2.30978e-05	3.70349e-05	3.50149e-05	2.58911e-05	3.50324e-05	3.44404e-05	1.97119e-05	3.0432e-05	2.12529e-05	2.1373e-05	4.25568e-05	3.756e-05	2.44824e-05	1.7626e-05	1.88604e-05	2.89368e-05	2.74934e-05	3.79451e-05	3.21034e-05
790	OxPC(16:0/18:2+2O)	0.657821	834.514	154.91	1.13249e-06	1.55156e-06	6.24881e-07	1.78339e-06	1.73594e-06	1.09291e-06	2.01292e-07	1.95451e-06	1.49322e-06	2.17152e-07	1.74574e-06	7.07706e-07	1.25037e-06	1.08055e-06	8.10044e-08	1.00222e-07	1.31896e-06	1.77326e-06	3.56636e-07	1.80728e-06	1.10045e-06	1.22037e-06	1.32464e-06	5.27774e-08	9.91682e-07	1.23509e-07	1.33563e-06	7.19746e-07	1.19335e-09	2.25987e-07	2.6399e-06	8.7186e-07	1.11172e-06	1.11272e-06	1.21343e-07	1.28224e-06	7.66751e-07	1.14732e-07	9.39681e-08	7.52417e-08	1.047e-06	7.61651e-07	1.082e-06	1.14506e-06	1.2963e-06
133	OxPC(16:0/20:3+1O(1Cyc))	0.978394	842.556	345.571	1.19967e-05	1.33755e-09	3.52956e-06	9.32368e-06	1.47131e-09	8.79363e-06	3.84793e-06	8.4848e-06	5.30598e-06	3.08447e-06	1.228e-09	1.03405e-05	7.54856e-06	3.945e-06	6.43983e-06	5.78249e-06	1.48552e-05	5.72605e-06	1.95895e-06	7.38849e-06	5.91779e-06	5.13285e-06	1.54968e-05	8.41618e-06	5.2983e-06	1.28533e-09	6.73542e-06	3.20072e-06	9.1724e-06	1.23084e-06	7.77858e-06	4.54465e-06	5.77874e-06	3.79785e-06	1.31141e-05	6.09921e-06	3.53079e-06	1.43489e-06	4.76705e-06	5.72637e-06	5.89426e-06	5.85757e-06	5.07147e-06	5.86951e-06	5.64953e-06
338	OxPC(16:0/20:3+2O(1Cyc))	0.915909	858.523	302.189	0.000207248	0.000297745	0.000370992	0.000317039	0.000288548	0.00043244	0.000459885	0.000307449	0.000483907	0.000393926	0.000268082	0.000217512	0.000230178	0.000339565	0.000250275	0.000425525	0.000258347	0.000208548	0.000385293	0.000546112	0.000334431	0.000330766	0.000280096	0.000429095	0.000326907	0.000320992	0.000313158	0.000536643	0.00036829	0.000416316	0.000424031	0.000494188	0.00034116	1.21068e-09	0.000397474	0.000345837	0.00056912	0.000527635	0.000265273	0.000192375	0.000238732	0.000355904	0.000321457	0.000368344	0.000380325
809	OxPC(16:0/20:5+3O)	0.632225	872.537	327.056	8.82072e-06	1.54911e-05	1.39941e-05	1.03907e-05	1.44318e-05	2.20143e-05	1.44448e-05	1.3742e-05	2.40804e-05	1.60467e-05	1.15378e-05	1.30876e-05	7.93636e-06	1.68529e-05	1.26066e-05	2.06281e-05	9.79629e-06	8.04756e-06	1.45697e-05	1.57699e-05	1.42145e-05	2.00025e-05	1.20564e-05	2.33404e-05	1.15852e-05	1.75457e-05	1.34562e-05	1.83214e-05	1.25438e-05	1.5921e-05	1.65271e-05	2.22804e-05	1.64643e-05	2.30802e-05	1.93335e-05	1.3842e-05	2.63735e-05	1.97285e-05	1.24797e-05	7.93506e-06	1.32273e-05	1.68022e-05	1.4795e-05	1.55727e-05	1.62275e-05
666	OxPC(18:0/20:5+3O)	0.794863	900.564	353.436	9.62589e-06	2.07151e-05	1.63949e-05	5.51086e-06	1.25873e-05	1.30433e-05	1.65113e-05	2.33781e-05	3.01763e-05	2.21172e-05	2.48614e-05	2.02011e-05	1.33528e-05	2.05069e-05	1.65958e-05	1.01372e-05	1.58848e-05	1.79173e-05	1.30536e-05	1.90632e-05	1.70817e-05	1.60996e-05	1.97245e-05	2.48808e-05	1.67198e-05	1.51443e-05	1.95636e-05	2.24312e-05	1.57833e-05	1.4258e-05	2.2341e-05	2.12437e-05	1.56252e-05	1.21068e-09	2.82852e-05	1.92295e-05	2.2348e-05	2.59781e-05	1.78108e-05	1.0838e-05	1.7613e-05	1.8296e-05	1.64683e-05	1.80809e-05	1.75099e-05
315	OxPI(16:0/18:1+3O)	0.931815	883.533	323.158	1.62239e-05	2.95344e-05	2.3975e-05	3.25172e-05	1.26973e-05	3.74586e-05	2.61104e-05	1.08646e-05	2.96184e-05	3.35318e-05	2.2331e-05	2.21103e-05	1.64486e-05	2.9196e-05	2.6838e-05	2.66995e-05	2.38391e-05	1.65205e-05	1.54519e-05	3.86351e-05	2.45301e-05	1.99499e-05	2.46136e-05	1.3788e-05	2.98783e-05	2.91413e-05	2.20272e-05	4.05657e-05	2.56481e-05	4.71901e-05	3.65173e-05	3.88074e-05	1.78341e-05	3.81139e-05	2.81733e-05	3.94755e-05	1.18155e-09	5.13214e-05	1.13988e-05	1.86835e-05	1.63163e-05	2.74722e-05	2.86734e-05	3.38668e-05	3.4766e-05
630	OxPI(16:0/20:3+3O)	0.820911	907.523	260.654	1.04169e-06	1.33141e-06	1.88695e-06	1.67199e-06	7.61483e-07	3.10321e-06	2.97792e-06	9.2946e-07	2.48124e-06	1.35053e-06	1.61347e-06	2.93702e-06	8.85497e-07	1.43879e-06	1.0725e-06	1.49091e-06	1.05741e-06	7.88562e-07	1.02845e-06	1.95903e-06	1.59038e-06	1.10235e-06	1.29085e-06	1.46867e-06	2.31137e-06	1.32521e-06	2.1961e-06	2.99547e-06	1.23418e-06	3.14729e-06	1.66271e-06	3.6754e-06	2.30791e-06	1.21068e-09	1.79657e-06	2.35299e-06	1.18155e-09	1.27249e-09	8.14966e-07	1.06531e-06	1.08089e-06	1.59159e-06	2.11018e-06	2.34406e-06	2.24474e-06
610	OxPI(16:0/20:4+3O(2Cyc))	0.831349	905.594	225.908	3.15054e-07	1.33755e-09	6.70622e-09	3.43113e-07	7.26163e-07	6.80882e-08	1.46989e-08	2.98365e-07	1.18954e-07	1.24641e-09	4.88444e-07	9.14442e-08	6.05326e-07	2.78195e-07	2.57007e-07	2.31396e-07	4.62477e-07	4.19762e-07	4.04626e-09	2.32562e-07	2.48219e-07	2.99937e-07	2.65525e-07	1.49627e-07	3.88157e-07	5.04452e-07	3.8213e-07	7.46926e-08	6.04729e-07	2.81747e-08	7.97605e-08	1.02842e-07	1.91515e-07	1.72933e-07	2.16294e-07	3.20617e-07	1.89599e-07	2.28441e-07	6.81573e-07	4.84378e-08	5.71594e-07	2.75051e-07	1.97273e-07	3.82664e-07	2.61548e-07
636	OxPI(16:0/20:4+3O)	0.817027	905.517	260.467	7.30735e-06	8.01848e-06	1.05742e-05	9.86862e-06	4.58744e-06	1.78736e-05	1.6704e-05	5.93695e-06	1.39913e-05	8.07421e-06	9.43713e-06	1.71983e-05	5.53249e-06	8.32685e-06	6.29036e-06	9.31485e-06	6.38941e-06	5.37816e-06	6.55114e-06	1.15271e-05	9.4441e-06	7.1058e-06	8.14363e-06	9.13531e-06	1.30487e-05	7.94732e-06	1.30135e-05	1.84667e-05	7.68581e-06	1.85019e-05	1.04531e-05	2.14043e-05	1.40519e-05	1.21068e-09	1.05664e-05	1.5432e-05	1.18155e-09	1.27249e-09	5.29566e-06	6.56208e-06	6.76615e-06	9.67919e-06	1.20214e-05	1.32391e-05	1.26971e-05
337	OxPI(18:0/18:1+3O)	0.916786	911.562	352.829	1.31462e-05	1.52762e-05	1.26985e-05	1.04544e-05	1.3443e-05	1.71923e-05	1.86036e-05	1.15607e-05	2.30858e-05	1.54112e-05	9.52132e-06	1.52001e-05	1.05116e-05	1.95841e-05	2.94286e-05	1.27075e-09	7.89392e-06	9.97118e-06	1.80219e-05	2.9062e-05	1.50034e-05	1.73901e-05	3.04867e-05	1.83223e-05	1.24427e-05	1.61429e-05	1.5969e-05	2.54268e-05	3.67751e-05	1.72867e-05	1.59215e-05	2.30599e-05	1.88434e-05	2.44287e-05	4.4545e-05	1.33743e-09	1.87932e-05	2.40534e-05	1.59135e-05	1.20475e-05	1.12633e-05	1.99557e-05	3.77765e-05	4.28213e-05	4.15257e-05
842	PA(18:0/18:0)	0.574835	703.538	480.789	4.57478e-09	3.73561e-05	2.84133e-05	2.70389e-05	2.37682e-05	2.98141e-05	2.38996e-05	3.00019e-05	2.91744e-05	2.019e-05	2.59884e-05	2.64939e-05	2.47173e-05	2.50404e-05	3.33975e-05	3.35356e-05	2.73379e-05	2.45251e-05	2.57471e-05	2.76622e-05	2.62053e-05	2.78885e-05	2.06404e-05	2.09148e-05	3.12512e-05	1.82072e-05	1.93878e-05	3.4418e-05	3.44642e-05	2.76795e-05	3.42441e-05	2.83708e-05	2.66202e-05	1.21068e-09	2.9009e-05	2.93706e-05	3.04086e-05	2.93512e-05	2.76098e-05	2.18302e-05	3.84664e-05	2.65067e-05	2.32748e-05	3.22556e-05	2.20137e-05
683	PA(26:4/26:4)	0.771581	911.649	542.656	4.57478e-09	3.84891e-05	4.23749e-05	3.38772e-05	5.07873e-05	4.01527e-05	5.10361e-05	6.03344e-05	4.93074e-05	3.54237e-05	4.28456e-05	5.11381e-05	4.54319e-05	4.87773e-05	4.66494e-05	3.78667e-05	3.86815e-05	2.97623e-05	5.843e-05	5.62645e-05	4.28817e-05	4.64535e-05	4.44402e-05	4.03459e-05	3.2906e-05	4.9743e-05	4.34931e-05	4.66913e-05	5.16891e-05	3.5746e-05	3.79149e-05	4.40554e-05	6.2718e-05	3.8552e-05	5.38729e-05	4.52168e-05	4.63309e-05	5.38459e-05	4.96802e-05	4.78534e-05	3.90653e-05	4.55307e-05	3.66482e-05	3.77958e-05	5.14545e-05
183	PC(10:0/10:0)	0.963032	566.381	111.847	4.65557e-06	2.96214e-06	4.86604e-07	1.90042e-06	3.95654e-06	1.90311e-06	1.72695e-06	3.10505e-06	2.65847e-06	8.48738e-07	3.58098e-06	1.13438e-06	2.26167e-06	1.93618e-06	2.19142e-06	1.77087e-06	1.77781e-06	2.36013e-06	1.19774e-06	2.13808e-06	2.22764e-06	3.64434e-06	3.19627e-06	1.22256e-09	2.24387e-06	3.22554e-06	3.47789e-06	2.13787e-06	4.06046e-06	1.09511e-06	2.96331e-06	1.5631e-06	1.85621e-06	3.6073e-06	4.31022e-06	2.19184e-06	3.26042e-06	1.2902e-06	3.82469e-06	1.24268e-06	2.83154e-06	2.6012e-06	2.48404e-06	2.80031e-06	2.75461e-06
293	PC(10:0/22:3)	0.939994	728.522	338.589	1.18919e-05	6.38574e-06	3.91634e-06	6.1751e-06	4.1695e-06	6.83366e-06	7.73816e-06	7.95386e-06	1.18992e-09	5.2508e-06	6.35037e-06	3.45847e-06	4.35808e-06	7.90036e-06	5.81405e-06	8.60767e-06	4.00271e-06	6.54215e-06	6.34971e-06	7.85965e-06	6.07797e-06	8.55187e-06	5.01988e-06	5.88924e-06	4.13183e-06	7.14492e-06	5.15986e-06	9.26463e-06	9.27399e-06	6.26557e-06	1.04988e-05	8.90685e-06	7.29265e-06	6.93003e-06	7.49684e-06	5.16545e-06	1.07594e-05	8.36285e-06	5.6452e-06	8.12441e-06	4.95309e-06	7.24187e-06	6.69924e-06	6.60039e-06	6.93368e-06
250	PC(10:0/26:4)	0.947589	782.568	446.942	4.57478e-09	0.000424992	0.000327427	0.000379458	0.000471561	0.000582337	0.000439915	0.000410903	0.000503438	0.000465453	0.000412767	0.000470402	0.000369182	0.00040019	0.000393528	0.00039634	1.42618e-09	0.000410967	0.00038367	0.000478398	0.000386047	0.000433071	0.000442073	0.000500412	0.000425413	0.000415111	0.000405091	0.000486735	0.000492137	0.000454515	0.000446068	0.000545162	0.00044871	0.000444853	0.000361963	0.000416543	0.000391322	0.000460971	0.000335147	0.000418846	0.000438387	0.000438126	0.000408774	0.000420897	0.000416121
242	PC(11:0/26:4)	0.948674	796.577	483.423	0.000126768	1.3325e-05	4.25097e-05	2.8471e-05	3.47781e-05	3.25495e-05	1.30837e-09	3.0221e-05	1.73113e-05	1.1126e-05	1.08244e-05	5.67956e-05	2.08466e-05	1.13128e-09	2.51947e-05	2.38701e-05	3.45478e-05	2.90585e-05	2.49725e-05	1.17511e-09	2.81587e-05	1.30829e-09	3.94138e-05	1.63225e-05	2.71956e-05	2.81328e-05	4.06866e-05	1.59463e-05	1.84437e-05	2.487e-05	2.17558e-05	3.28048e-05	3.39939e-05	1.21068e-09	1.29905e-09	3.44141e-05	1.18155e-09	1.27249e-09	1.27449e-09	5.90539e-05	1.96508e-05	2.06346e-05	1.11434e-05	0.000238455	2.18921e-05
211	PC(12:0/22:3)	0.957404	756.543	359.515	2.24498e-05	3.50629e-05	1.65382e-05	2.91447e-05	2.37474e-05	3.08165e-05	3.54987e-05	3.60049e-05	3.95466e-05	1.80056e-05	2.93643e-05	2.68229e-05	2.85172e-05	4.28013e-05	3.23902e-05	3.09656e-05	2.62252e-05	2.74776e-05	1.8409e-05	3.45987e-05	2.92194e-05	5.9691e-05	2.93775e-05	2.9672e-05	3.37534e-05	3.85037e-05	2.73878e-05	3.57606e-05	4.46087e-05	4.07834e-05	3.25135e-05	4.27292e-05	3.77159e-05	4.05708e-05	2.73849e-05	3.45463e-05	4.80467e-05	4.88933e-05	2.66993e-05	2.62979e-05	2.33835e-05	3.6416e-05	3.43976e-05	3.52816e-05	3.40677e-05
239	PC(12:0/26:4)	0.94953	810.599	465.315	4.57478e-09	0.0109657	0.0120854	0.0125924	0.0128683	0.0146585	0.0126756	0.01111	0.0153677	0.0133406	0.0122531	0.0130985	0.0155906	0.0122001	0.00986545	0.014054	0.0133562	0.0132543	0.0106333	0.0107671	0.0120368	0.0126619	0.0117007	0.0138955	0.0108741	0.0135971	0.0134468	0.0124005	0.0132496	0.0146926	0.011283	0.0132274	0.0146276	0.0128929	0.0165458	0.0122495	0.0135646	0.0131329	0.0117854	0.0147119	0.00979036	0.0130165	0.0116366	0.0115965	0.0118464
432	PC(12:0/27:0)	0.876572	832.655	530.776	4.8008e-05	1.25072e-05	1.7354e-05	1.83983e-05	9.22305e-06	9.57971e-06	1.09708e-05	1.61064e-05	1.02127e-05	1.49614e-05	1.25103e-05	1.63519e-05	2.22388e-05	1.16853e-05	1.18633e-05	1.72297e-05	1.29715e-05	1.57474e-05	1.91611e-05	1.3797e-05	1.60439e-05	1.70145e-05	1.2364e-05	1.12061e-05	9.51505e-06	1.34177e-05	9.46546e-06	9.38613e-06	6.05112e-06	1.17368e-05	1.1692e-05	6.63905e-06	4.8902e-06	1.16241e-05	8.72321e-06	6.47654e-06	1.18234e-05	7.80036e-06	1.09545e-05	1.61361e-05	1.73907e-05	1.07153e-05	1.38136e-05	1.23946e-05	1.38501e-05
305	PC(13:0/22:3)	0.935735	770.567	408.015	4.57478e-09	0.00010601	4.86087e-05	6.9638e-05	9.43486e-05	6.17881e-05	7.84435e-05	5.95623e-05	6.88622e-05	6.68261e-05	5.98728e-05	4.99616e-05	9.54487e-05	8.88534e-05	4.81855e-05	0.000115639	5.92043e-05	5.72219e-05	7.76166e-05	5.46224e-05	6.80359e-05	1.30829e-09	6.88116e-05	7.32998e-05	8.25823e-05	9.84657e-05	9.72899e-05	7.05395e-05	7.2792e-05	7.54086e-05	6.37393e-05	7.82381e-05	8.44407e-05	5.9275e-05	7.98318e-05	9.32699e-05	1.18155e-09	9.55334e-05	0.000106251	8.65472e-05	8.36344e-05	7.34976e-05	7.45473e-05	7.44656e-05	8.0672e-05
314	PC(13:1/24:2)	0.932264	798.591	440.861	4.57478e-09	6.29114e-05	8.02939e-05	7.84019e-05	0.00011754	1.35098e-09	9.10235e-05	9.88365e-05	0.000131546	0.000105909	6.52443e-05	9.74766e-05	7.65237e-05	7.62147e-05	8.33296e-05	0.000129416	7.33942e-05	5.76072e-05	9.96135e-05	7.65696e-05	8.00929e-05	0.000150363	7.51538e-05	1.22256e-09	7.3526e-05	0.000124122	8.9486e-05	6.59474e-05	6.85313e-05	7.95062e-05	9.40925e-05	9.52128e-05	0.000109583	9.83912e-05	7.20487e-05	6.78929e-05	0.000124785	7.46307e-05	7.54323e-05	6.98676e-05	7.05398e-05	8.39557e-05	9.91139e-05	9.54601e-05	9.56415e-05
214	PC(13:1/24:4)	0.955827	794.588	357.049	2.75006e-06	6.21702e-06	3.63313e-06	6.90346e-06	6.97924e-06	6.22716e-06	4.73923e-06	6.0385e-06	1.1604e-05	7.2068e-06	5.05146e-06	3.70683e-06	4.53376e-06	6.26741e-06	5.55539e-06	7.72134e-06	4.72201e-06	4.65561e-06	5.86264e-06	1.17511e-09	5.51881e-06	1.23252e-05	6.3544e-06	9.3493e-06	8.13113e-06	7.63452e-06	6.5808e-06	1.03963e-05	1.04809e-05	5.62278e-06	7.52678e-06	8.40815e-06	4.2752e-06	1.07758e-05	5.41028e-06	6.38253e-06	8.99427e-06	9.22949e-06	6.06533e-06	2.73484e-06	5.15181e-06	7.59149e-06	6.53313e-06	6.71872e-06	6.98693e-06
268	PC(13:1/26:4)	0.946072	822.594	484.101	4.70189e-06	9.92762e-07	2.66017e-06	3.30896e-06	1.47131e-09	5.78384e-06	1.30837e-09	1.86074e-06	5.57555e-06	1.42175e-07	2.71878e-06	1.49885e-09	4.33364e-06	2.94421e-06	3.8246e-06	2.86707e-06	4.39067e-06	4.67678e-06	3.67122e-06	2.80204e-06	2.86297e-06	2.66074e-06	1.57011e-06	2.82675e-06	1.43359e-09	4.67895e-06	8.72212e-07	4.18012e-06	2.26556e-06	1.12793e-06	3.94515e-06	1.26938e-09	2.86584e-06	2.50495e-06	3.36554e-06	2.92519e-06	1.18155e-09	1.27249e-09	4.3983e-06	1.81728e-09	6.47403e-06	2.33342e-06	1.38014e-06	3.02972e-06	5.53594e-06
230	PC(14:0/14:0)	0.952837	678.507	349.655	1.7123e-05	3.17176e-05	7.05545e-06	2.11145e-05	1.0407e-05	1.84229e-05	2.83326e-05	3.30896e-05	1.60288e-05	8.64325e-06	1.77602e-05	1.67273e-05	3.43915e-05	2.69627e-05	2.62115e-05	4.05169e-05	1.76022e-05	1.74033e-05	1.68919e-05	2.39472e-05	2.15175e-05	1.30829e-09	1.85402e-05	1.72802e-05	3.08123e-05	1.28533e-09	2.70347e-05	1.66208e-05	2.55955e-05	2.37572e-05	2.05488e-05	3.45217e-05	2.98112e-05	2.1269e-05	1.70268e-05	2.39057e-05	1.18155e-09	2.81376e-05	2.23507e-05	3.54789e-05	1.22083e-05	2.02452e-05	2.68711e-05	2.56584e-05	2.58176e-05
548	PC(14:0/18:2)	0.870975	774.505	326.575	1.77042e-06	1.62659e-06	5.17463e-07	4.38715e-07	1.07411e-06	8.39581e-07	6.34223e-07	1.21116e-06	8.95883e-07	3.17933e-07	1.63251e-06	1.28537e-06	1.4131e-06	8.62317e-07	1.27051e-06	1.17572e-06	1.36278e-06	1.17065e-06	4.42032e-07	1.17584e-06	1.05585e-06	1.64655e-06	1.53816e-06	1.87476e-06	1.33419e-06	1.4205e-06	1.18599e-06	4.6324e-07	1.40094e-06	2.37467e-07	7.66168e-07	6.10423e-07	8.83068e-07	5.96677e-07	1.30888e-06	9.92475e-07	6.56168e-07	2.61787e-07	1.25674e-06	1.17256e-06	1.28264e-06	1.04447e-06	9.42171e-07	1.0944e-06	1.05812e-06
188	PC(14:0/20:4)	0.962361	798.529	361.701	5.88959e-05	4.60463e-05	2.09987e-05	4.15e-05	3.52123e-05	4.48618e-05	4.78007e-05	4.68419e-05	4.69772e-05	2.0322e-05	3.3881e-05	4.35294e-05	4.53713e-05	4.64593e-05	4.48232e-05	3.82944e-05	3.70268e-05	4.58565e-05	2.71443e-05	3.97146e-05	4.05779e-05	6.07325e-05	3.95672e-05	3.35463e-05	4.57751e-05	4.7929e-05	3.8122e-05	4.05526e-05	4.19589e-05	4.75564e-05	3.31726e-05	4.83206e-05	5.37531e-05	4.09017e-05	3.35899e-05	4.5758e-05	4.65221e-05	5.29972e-05	3.19563e-05	4.73947e-05	2.96717e-05	4.29889e-05	3.61656e-05	4.0068e-05	4.14737e-05
294	PC(14:0/22:3)	0.939893	784.584	437.944	4.57478e-09	0.0128747	0.0147752	0.0110842	0.0190901	0.0139873	0.0173962	0.0142293	0.0155245	0.0107686	0.00954888	0.0100782	0.0159144	0.0158018	0.0174215	0.0110741	0.0174891	0.0164934	0.0109068	0.0180964	0.0136277	0.0228664	0.0176752	0.0162018	0.0211835	0.0182338	0.0132203	0.021027	0.021217	0.0111596	0.0158868	0.0187756	0.0137845	0.0169065	0.0184896	0.0205705	0.0141593	0.0158402	0.0198745	0.0177595	0.0219868	0.0178409	0.0124482	0.0178823	0.0116311
186	PC(14:0/22:5)	0.962774	780.516	337.42	4.63415e-06	3.91112e-06	7.75266e-07	1.28133e-09	2.96801e-06	2.73833e-06	9.55148e-07	3.56685e-06	1.20353e-06	9.57897e-07	3.56443e-06	1.26761e-06	2.87142e-06	1.39947e-06	3.11813e-06	4.30528e-06	1.61502e-06	1.31646e-06	9.19733e-07	3.35141e-06	2.27203e-06	2.25083e-06	3.03789e-06	2.11091e-06	1.7879e-06	3.04735e-06	2.66419e-06	8.13193e-07	3.44352e-06	5.44816e-07	1.62102e-06	1.51903e-06	1.39792e-06	2.37767e-06	2.17469e-06	1.66229e-06	1.63271e-06	6.34569e-07	1.82512e-06	1.43568e-06	2.26649e-06	1.91239e-06	1.91055e-06	1.99808e-06	1.93812e-06
904	PC(14:0/22:6)	0.491115	778.535	389.907	0.00023613	0.000165279	9.4155e-05	0.000159825	0.000165407	0.000106295	0.000152425	0.000129519	0.000142152	0.000124064	0.000110761	0.000155324	0.000109792	9.76253e-05	0.000186759	0.000129051	0.000108296	0.000124399	0.000165181	0.000140339	0.000140139	0.00011835	0.000103154	0.000140336	9.28905e-05	0.000138426	9.08515e-05	8.92301e-05	0.000189063	0.000111808	0.000161864	0.000119732	0.000138853	0.000147588	0.000140264	9.15434e-05	0.000182377	0.000176104	0.000148289	0.000229244	8.41564e-05	0.000134706	9.40647e-05	8.9585e-05	0.0001414
199	PC(14:0/26:4)	0.959862	838.629	501.767	0.000617527	0.000191418	0.000619537	0.000363487	0.000403299	0.000231373	0.000316445	0.00049894	0.000297056	0.000230269	0.000261288	0.000234929	0.000368293	0.000245988	0.000281319	0.000173965	0.000289371	0.000262321	0.000488379	0.000207613	0.000329141	0.000595656	0.000230875	0.000305937	0.00019995	0.000474779	0.000170579	0.000183091	0.000399179	1.34107e-09	0.000232437	0.000435318	0.000244587	0.000503545	0.000298894	0.000308327	0.000252866	0.000225393	0.000373079	0.000376564	0.000118471	0.000296476	0.000375708	0.000363281	0.000251806
58	PC(14:0e/17:0)	0.99627	706.581	397.926	4.57478e-09	0.000302194	0.00033454	0.000367014	0.000304633	0.000309289	0.000292574	0.000276521	0.000306227	0.000264186	0.000304345	0.000272985	0.000279986	0.000275843	0.000291832	0.000293042	0.000294203	0.000302372	0.000294889	0.000295395	0.000283104	0.000358164	0.000288146	0.000298743	0.000285985	0.000294604	0.000301676	0.000301465	0.000336668	0.000304007	0.000298212	0.000304189	0.000261388	0.000302681	0.000321302	0.00029921	0.00033181	0.000312821	0.000290714	0.000310494	0.000312198	0.000305724	0.00029531	0.00027266	0.000293587
163	PC(14:0e/18:1)	0.969083	718.592	426.416	0.000293734	0.000144719	0.000152844	0.000165845	0.00018172	0.000178224	0.000119392	0.000133356	0.000169211	0.000115412	0.000125286	0.000128806	0.000116132	0.000120743	0.00011677	0.000151002	0.000152018	0.000117502	0.00012751	0.000108166	0.000145919	1.30829e-09	0.000146275	0.000137881	0.00013908	0.000187199	0.000170525	0.000108642	0.000117352	0.000157964	0.000121045	0.00012487	0.000139148	0.000122499	0.000149068	0.000143223	1.18155e-09	0.000110763	0.000131446	0.00014194	9.55957e-05	0.000122226	0.000131771	0.000129314	0.000127577
50	PC(14:0e/4:0)	0.99767	524.334	94.9883	1.15923e-05	8.29343e-06	4.55389e-06	5.20339e-06	6.7977e-06	7.92317e-06	9.19407e-06	6.86571e-06	5.37603e-06	4.21294e-06	8.46101e-06	7.28456e-06	8.54864e-06	5.81369e-06	7.8327e-06	1.27075e-09	7.05689e-06	9.7163e-06	3.79695e-06	8.98306e-06	6.87539e-06	7.8835e-06	3.65074e-06	4.64528e-06	3.60222e-06	4.44493e-06	5.21979e-06	3.35877e-06	9.0206e-06	1.81175e-06	5.31235e-06	2.95837e-06	4.08682e-06	4.41926e-06	5.09189e-06	5.28275e-06	5.01898e-06	1.55884e-06	5.1749e-06	1.12553e-05	1.32969e-09	4.68992e-06	7.43305e-06	7.86073e-06	7.9097e-06
354	PC(14:1/22:6)	0.908384	776.52	360.342	4.01235e-06	4.36866e-05	1.74832e-05	3.7845e-05	2.29393e-05	4.14695e-05	5.54329e-05	4.91223e-05	5.16953e-05	2.14823e-05	3.20622e-05	2.74136e-05	3.17804e-05	5.66309e-05	4.76947e-05	4.22283e-05	2.90616e-05	2.98498e-05	2.75516e-05	4.32241e-05	3.56333e-05	1.30829e-09	3.46165e-05	4.30837e-05	4.12865e-05	4.66019e-05	2.77368e-05	5.17312e-05	5.81075e-05	4.61224e-05	4.15381e-05	6.19128e-05	4.79199e-05	4.94389e-05	3.59333e-05	4.21088e-05	6.9629e-05	7.16505e-05	2.91624e-05	2.52263e-05	2.28664e-05	4.23337e-05	4.51914e-05	4.4321e-05	4.38937e-05
178	PC(14:1/24:4)	0.964238	808.573	378.67	0.0010619	0.00127117	0.00153097	0.00146693	0.00127402	0.00168957	0.00175129	0.00166329	0.00200024	0.00186932	0.0013666	0.00241593	0.00119188	0.00192213	0.00127444	0.00161962	0.00117363	0.00204289	0.00155364	0.00206431	0.00161019	0.00196489	0.00177149	0.00200487	0.00121662	0.00124992	0.00153137	0.00194482	0.0015185	0.00176343	0.00146237	0.00207876	0.0020312	1.21068e-09	0.00188168	0.00125471	0.00242018	0.00220011	0.00145166	0.000972508	0.00129624	0.00160077	0.00152535	0.0015057	0.00157771
198	PC(14:1/26:4)	0.959896	836.61	451.969	4.57478e-09	0.000266081	0.000317811	0.000227094	0.000222457	0.000211961	0.000242909	0.000269815	0.000261557	0.000289455	0.000318763	1.49885e-09	0.000339973	0.000349889	0.000272252	0.000241259	0.000302753	0.000265568	0.000280159	0.000233663	0.000245671	0.000330904	0.000219254	0.000253636	0.000267511	0.000323581	0.000246798	0.000310343	0.000276752	0.000279992	0.000297181	0.000275505	0.000303765	0.000352802	0.000390163	0.000311892	0.000341481	0.000415125	0.000390724	1.81728e-09	0.000288192	0.00029378	0.000289888	0.000278988	0.000276654
571	PC(14:1e/16:0)	0.862797	734.554	373.029	7.83751e-05	2.79602e-05	1.46536e-09	3.60761e-05	3.59934e-05	3.26546e-05	1.53164e-05	1.33023e-09	2.31672e-05	9.72302e-06	2.0816e-05	1.9157e-05	1.17589e-05	2.3238e-05	1.32527e-09	4.31911e-05	2.90245e-05	2.25146e-05	1.58682e-05	1.92601e-06	2.23382e-05	1.30829e-09	1.40393e-09	3.2782e-05	2.46684e-05	4.12451e-05	3.78411e-05	2.27921e-05	2.14158e-05	3.65328e-05	1.81254e-05	1.67605e-05	2.95729e-05	1.22328e-05	2.61977e-06	1.72422e-05	4.82301e-05	3.27198e-05	3.00734e-05	2.20527e-05	2.38539e-06	2.24648e-05	2.21662e-05	2.61204e-05	1.31933e-05
919	PC(14:1e/19:2)	0.328923	728.574	420.15	4.57478e-09	2.40419e-06	7.23429e-06	7.28172e-06	3.48354e-06	2.90215e-06	3.06662e-06	3.61477e-06	5.53497e-07	1.69578e-06	2.64558e-06	5.44448e-06	5.44334e-06	1.57565e-06	2.07289e-06	1.57146e-06	7.45581e-06	6.64747e-06	3.67355e-06	1.03489e-06	3.49031e-06	1.4144e-06	4.85406e-06	6.38258e-07	4.46894e-06	5.26541e-06	3.91367e-06	2.11073e-06	1.56136e-06	4.77736e-06	1.82076e-06	8.05123e-07	4.19805e-06	1.25279e-06	4.60367e-06	2.02062e-06	2.82868e-06	2.13579e-06	2.16115e-06	1.20638e-05	3.2427e-06	3.30686e-06	2.12671e-06	1.50789e-06	2.31969e-06
156	PC(14:1e/2:0)	0.972104	494.324	75.6965	7.45174e-07	1.00315e-05	3.40413e-06	5.77404e-06	5.05405e-06	6.67253e-06	7.33328e-06	1.15369e-05	1.22314e-05	4.14861e-06	1.13144e-05	5.1331e-06	1.09154e-05	9.23203e-06	1.00979e-05	1.70124e-05	7.44544e-06	8.53208e-06	7.63406e-06	1.25897e-05	8.34191e-06	8.91097e-06	4.23003e-06	6.62896e-06	4.18845e-06	9.5768e-06	6.06895e-06	1.05115e-05	1.05742e-05	6.16962e-06	1.02385e-05	9.1975e-06	8.68006e-06	9.57983e-06	9.95243e-06	7.41611e-06	1.49314e-05	5.93987e-06	1.05409e-05	4.97461e-06	7.09205e-06	8.27014e-06	9.20058e-06	8.03214e-06	8.02778e-06
117	PC(14:1e/4:0)	0.981313	522.346	79.5424	1.07048e-06	3.2648e-06	8.80517e-07	2.36907e-06	2.48013e-06	4.55212e-06	1.2002e-05	6.31952e-06	5.90941e-06	5.70787e-06	9.00718e-06	1.27878e-06	3.96058e-06	6.88648e-06	5.67359e-06	1.08357e-05	3.54422e-06	3.46468e-06	1.27353e-05	1.17511e-09	5.09718e-06	4.88349e-06	3.01286e-06	3.14896e-06	1.20276e-06	3.06673e-06	3.04321e-06	7.15348e-06	6.6422e-06	3.88919e-06	6.29329e-06	4.92624e-06	6.40753e-06	4.67771e-06	1.29905e-09	3.90889e-06	1.18155e-09	6.07393e-06	1.14728e-05	7.66429e-07	7.6186e-06	4.40954e-06	4.89664e-06	5.08836e-06	4.76624e-06
565	PC(15:0/15:0)	0.86589	706.537	408.003	4.57478e-09	0.00183624	0.000882599	0.00158167	0.00101168	0.00121745	0.00132816	0.0017855	0.00106255	1.24641e-09	0.00137708	0.00161811	0.00218509	0.00158894	0.00189911	1.27075e-09	0.00148411	0.00145818	0.00136494	0.00151093	0.00125962	1.30829e-09	0.00129828	0.00130984	0.0018716	0.00213125	0.00174941	0.00123868	0.00146318	0.00146475	0.00137793	0.00162594	0.0016468	0.00144506	0.00135662	0.00157689	1.18155e-09	0.00161748	0.00158064	0.00203779	0.00134295	0.00140675	0.00152933	0.00146823	0.00152832
291	PC(15:0/15:1)	0.941072	704.522	364.56	5.46544e-05	7.99059e-05	1.63837e-05	5.54545e-05	2.31469e-05	1.92522e-05	1.66907e-05	5.19766e-05	4.09728e-05	1.40988e-05	3.92053e-05	3.97814e-05	2.30438e-05	3.4633e-05	2.87625e-05	7.62807e-05	3.81454e-05	3.27543e-05	3.80874e-05	4.95724e-05	3.86401e-05	1.30829e-09	2.84434e-05	4.20532e-05	4.66136e-05	1.28533e-09	4.31234e-05	4.25173e-05	4.55044e-05	4.19898e-05	4.43132e-05	6.27203e-05	3.81121e-05	5.61681e-05	3.1776e-05	4.30567e-05	1.18155e-09	4.68871e-05	3.3645e-05	6.0752e-05	1.78736e-05	3.62777e-05	4.7961e-05	3.15234e-05	4.94827e-05
253	PC(15:0/22:3)	0.946559	798.599	461.911	2.54228e-05	5.35994e-05	3.26041e-05	4.15506e-05	7.1352e-05	3.09953e-05	4.41734e-05	3.03431e-05	3.13971e-05	4.46419e-05	3.82655e-05	3.581e-05	5.39125e-05	5.98562e-05	4.18209e-05	4.26648e-05	4.19112e-05	3.99307e-05	4.22225e-05	3.30825e-05	4.17778e-05	1.30829e-09	3.95423e-05	4.94464e-05	5.98888e-05	1.28533e-09	6.65547e-05	4.81648e-05	7.50729e-05	4.28768e-05	3.06548e-05	3.34255e-05	5.83989e-05	3.34085e-05	6.04022e-05	5.54181e-05	1.18155e-09	5.78427e-05	6.57891e-05	4.91986e-05	5.61806e-05	4.41135e-05	5.10067e-05	4.7501e-05	4.30834e-05
219	PC(15:0/22:6)	0.955006	792.543	404.333	4.57478e-09	0.000187383	0.000227495	8.57316e-05	0.000111623	0.000143649	0.000158696	0.000222753	0.000260885	0.000220303	0.000210521	0.000359626	0.000171759	0.000188032	0.000236208	0.000203541	0.000161405	0.000119363	0.000241108	0.000209775	0.000185993	0.000210462	0.000196116	0.000247478	0.000193684	0.000151094	0.000165246	0.000206209	0.000196444	0.000115024	0.000271994	0.000196251	0.000104269	0.000273336	0.000237282	0.000221952	0.000211497	0.000220855	0.000227773	0.000104982	0.000228919	0.000199043	0.000201946	0.000186327	0.000195776
870	PC(15:1/20:4)	0.547067	810.529	432.312	6.82166e-05	1.72385e-05	6.98196e-05	3.67729e-05	1.83319e-05	1.88616e-05	3.16676e-05	3.45177e-05	0.000408486	0.000322245	2.03488e-05	0.000410647	1.79385e-05	0.00028346	2.01249e-05	2.73684e-05	1.89168e-05	0.000382322	3.40149e-05	1.99554e-05	0.000113063	1.94273e-05	0.000282616	0.00038869	2.05074e-05	0.000300462	2.55438e-05	1.60637e-05	1.92856e-05	2.09075e-05	2.21864e-05	1.91071e-05	2.84154e-05	9.19789e-05	0.000376112	1.80313e-05	1.68231e-05	2.03109e-05	0.000340895	3.04893e-05	0.000315715	0.000118678	1.63483e-05	1.85055e-05	1.62922e-05
890	PC(16:0/15:1)	0.521001	762.533	446.513	4.57478e-09	7.73522e-06	1.0624e-05	1.28133e-09	6.80016e-06	1.20084e-05	7.74727e-06	5.58856e-06	1.1485e-05	8.66667e-06	1.0064e-05	9.61192e-06	1.03125e-05	1.23069e-05	9.46845e-06	7.97285e-06	8.84809e-06	7.12762e-06	7.65342e-06	1.23007e-05	8.31638e-06	1.4177e-05	9.44518e-06	1.10898e-05	7.49271e-06	1.05524e-05	8.38533e-06	1.19093e-05	6.3422e-06	7.67161e-06	9.01595e-06	9.54481e-06	1.00591e-05	8.52545e-06	9.23196e-06	7.73573e-06	1.12429e-05	7.48618e-06	1.20268e-05	7.88091e-06	8.66747e-06	9.42415e-06	7.68783e-06	8.11604e-06	7.47473e-06
201	PC(16:0/16:0)	0.959401	734.57	458.576	4.57478e-09	0.0262273	0.0293838	0.0263492	0.0239024	0.0232284	0.0275202	0.0286534	0.0208607	0.0208736	0.0249323	0.0315218	0.0295291	0.0257134	0.0293254	0.0249722	0.0266281	0.0258337	0.0276142	0.0264019	0.0249736	0.0284681	0.0261891	0.0309436	0.0261692	0.023755	0.0245859	0.0267208	1.19335e-09	0.0231613	0.0316973	0.0250687	0.0309134	0.0271685	0.0282447	0.0267129	0.0244205	0.027839	0.0250635	0.0275222	0.0310471	0.0257845	0.0257847	0.0249881	0.02471
356	PC(16:0/16:1)	0.90748	776.545	414.594	0.000599739	0.000311867	0.000184643	0.000299345	0.000198065	0.000171455	0.000203315	0.000233528	0.000220834	0.000121654	0.000217516	0.000250625	0.000286731	0.000214763	0.000231545	0.000285678	0.000229287	0.000228557	0.000207654	0.000239048	0.000246792	0.000292309	0.000183087	0.000240049	0.000266019	0.00030452	0.000235365	0.00022667	0.000195887	0.000210912	0.000238496	0.000223906	0.000196776	0.000257423	0.000183879	0.000219056	0.000229046	0.000220265	0.000180919	0.000325366	0.000233887	0.000233192	0.00020005	0.000220947	0.000228184
275	PC(16:0/18:2)	0.944022	802.566	407.92	1.16011e-05	7.70841e-07	1.14277e-06	1.32983e-06	2.04388e-06	1.50437e-06	1.78377e-06	1.33023e-09	1.25223e-06	4.65943e-06	1.39479e-06	6.189e-07	8.91116e-07	3.77514e-06	6.22943e-07	1.27075e-09	1.49827e-06	5.71353e-06	4.66188e-06	1.55668e-06	2.3412e-06	1.60085e-06	4.63228e-06	1.59259e-06	5.03101e-07	1.02601e-06	4.3788e-06	3.60299e-06	2.20532e-06	1.58082e-06	1.86263e-06	3.54674e-06	2.93066e-06	1.41883e-06	1.16205e-06	1.46647e-06	1.97513e-06	1.67623e-06	9.28875e-07	6.77439e-07	5.94134e-07	1.9681e-06	1.45424e-06	1.58366e-06	1.45983e-06
309	PC(16:0/18:3)	0.934919	800.545	396.889	9.76837e-05	5.1338e-05	3.23658e-05	5.224e-05	4.19576e-05	4.43936e-05	3.70414e-05	4.13504e-05	4.26687e-05	3.59853e-05	5.76386e-05	3.18143e-05	3.99715e-05	4.44538e-05	4.583e-05	5.03567e-05	3.74794e-05	4.99956e-05	4.05645e-05	4.61973e-05	4.60663e-05	5.34571e-05	4.03716e-05	3.99192e-05	3.53913e-05	3.89341e-05	3.81004e-05	4.00692e-05	4.32695e-05	4.00067e-05	4.20734e-05	3.9677e-05	4.12347e-05	4.0859e-05	3.9882e-05	3.80399e-05	1.18155e-09	4.38355e-05	4.59685e-05	4.52929e-05	3.65387e-05	3.91461e-05	3.76191e-05	4.11802e-05	4.11369e-05
296	PC(16:0/20:3)	0.939269	828.567	413.492	4.57478e-09	0.000554109	0.000616896	0.000580964	0.000667125	0.000731683	0.000591034	0.000578626	0.000722004	0.000634699	0.000549815	0.000628011	0.000548425	0.000553156	0.000482592	0.000552462	0.000599734	0.000613873	0.000534789	0.000671529	0.000570577	0.000572923	0.000610971	0.000623914	0.000584591	0.000589355	0.000563789	0.000655605	0.000622352	0.000629116	0.000561856	0.000683412	0.000663965	0.000687192	0.000494422	0.00056024	0.000577788	0.000597647	0.000472957	0.000600208	0.000496109	0.000592421	0.000519139	0.000581618	0.000592858
172	PC(16:0/20:4)	0.967089	826.558	450.935	4.57478e-09	0.000246705	1.46536e-09	0.000239521	0.000280315	0.000311034	0.000239916	0.000264632	1.18992e-09	0.000249248	0.00022572	0.000303665	0.000252627	0.000205415	0.000223168	0.000224803	1.42618e-09	0.000261232	0.000245703	0.000281331	0.000202752	0.00021695	0.000253114	0.0002864	0.000248172	1.28533e-09	0.00023793	0.000273756	0.000286203	0.000235775	0.000279345	1.26938e-09	1.47183e-09	0.000264407	0.000224267	0.000241328	0.000207293	1.27249e-09	0.000216221	1.81728e-09	0.000225992	0.000184858	0.000228859	0.000220663	5.13604e-05
411	PC(16:0/20:5)	0.886891	824.545	403.532	4.57478e-09	7.64094e-06	1.25299e-05	7.40263e-06	7.41527e-06	1.12275e-05	2.41665e-06	8.79521e-06	9.31652e-06	6.33313e-06	1.07779e-05	1.24469e-05	4.17954e-06	5.73147e-06	7.4339e-06	6.56389e-06	5.44645e-06	2.57611e-06	7.39172e-06	8.01446e-06	7.18223e-06	6.12881e-06	7.80347e-06	9.3709e-06	4.48833e-06	9.33173e-06	5.82034e-06	5.72617e-06	7.62692e-06	9.12413e-06	5.28273e-06	8.62963e-06	1.47183e-09	9.73245e-06	6.47226e-06	5.9571e-06	6.66894e-06	6.43255e-06	5.89941e-06	1.07219e-05	7.07324e-06	6.91462e-06	6.20563e-06	6.32149e-06	7.16157e-06
210	PC(16:0/22:3)	0.957833	812.616	490.389	0.00208679	0.00259786	0.00124626	0.00248692	0.00211232	0.00140695	1.30837e-09	0.00164908	0.00245309	0.00211904	0.00244447	0.00168779	0.00504019	0.00426781	0.00183435	0.00183569	0.00245006	0.002413	0.00187511	0.00216837	0.00220876	1.30829e-09	0.00174781	0.00198435	0.00533626	0.00290785	0.00246033	1.21998e-09	0.00300575	0.00253171	0.00200106	0.00243554	0.00272025	0.00227816	0.00317957	0.00299219	0.00340926	0.00370779	1.27449e-09	0.00232316	0.00244574	0.00237334	0.00261632	0.00253076	0.00254534
158	PC(16:0/22:6)	0.971556	806.565	439.961	0.00169934	0.00127009	0.00110843	1.28133e-09	0.00135915	1.35098e-09	0.000535312	0.00112799	0.000907064	0.00111371	0.000990968	0.00122764	0.00145828	0.00104157	0.000533854	0.000718396	0.00131472	0.0013042	0.00056302	0.00048444	0.000937909	0.00104197	0.0012873	0.000470538	0.00149219	0.00113671	0.00134733	0.00107753	0.00059342	0.00112185	0.000499867	0.00116004	0.000812193	0.000938267	0.00117885	0.00124605	0.000415309	0.00106593	0.00117188	0.00165101	0.000661859	0.0010185	0.000934215	0.000971242	0.000978179
152	PC(16:0/24:4)	0.973409	882.508	481.457	4.14075e-06	1.97661e-06	2.85299e-06	2.42698e-06	2.35428e-06	1.95493e-06	1.66048e-06	2.32028e-06	9.64639e-07	1.24641e-09	2.26551e-06	4.02231e-06	1.91111e-06	2.0366e-06	2.61047e-06	2.99892e-06	2.12286e-06	3.27577e-06	3.51405e-06	3.26825e-06	2.43395e-06	1.78179e-06	2.34966e-06	3.49954e-06	2.12478e-06	2.33333e-06	1.92492e-06	2.47316e-06	2.49484e-06	2.56238e-06	2.45372e-06	2.0533e-06	2.58555e-06	2.65386e-06	1.87625e-06	2.16802e-06	2.27184e-06	3.20327e-06	2.12935e-06	3.71093e-06	2.37511e-06	2.45128e-06	1.60084e-06	1.52678e-06	2.4826e-06
609	PC(16:0e/18:2)	0.831803	788.581	497.063	0.000220306	9.64738e-05	9.51389e-05	6.59161e-05	8.24082e-05	9.12393e-05	8.8791e-05	9.22716e-05	0.000113343	9.13497e-05	9.61887e-05	0.000118075	7.85945e-05	9.37175e-05	9.18594e-05	8.42728e-05	8.61287e-05	0.000108664	0.000109146	9.156e-05	9.97722e-05	0.000122784	8.11511e-05	8.8458e-05	8.68192e-05	8.14701e-05	9.19403e-05	8.82127e-05	9.3645e-05	8.46548e-05	0.000102949	6.77965e-05	6.98201e-05	0.000122282	8.06651e-05	8.00154e-05	1.18155e-09	9.90418e-05	9.56244e-05	8.66818e-05	9.05517e-05	8.57282e-05	8.87959e-05	9.46699e-05	9.37024e-05
306	PC(16:0e/20:4)	0.935622	812.579	453.259	0.000427926	0.000260447	0.000308908	0.000230764	0.000343093	0.000301737	0.000369016	0.000264536	0.000273669	0.000320408	0.000376818	0.00025313	0.000247028	0.000264276	0.000281806	0.000224942	0.000248343	0.000329368	0.000302334	0.000301959	0.000296525	0.000309405	0.00028402	1.22256e-09	0.000221262	0.000277448	0.00023474	0.000314424	0.000304195	0.000266144	0.000321197	0.000230715	0.000309019	0.000331942	0.000294773	0.000289931	0.000412038	0.000363694	0.000337671	0.0002301	0.000277266	0.000280499	0.000276841	0.000290267	0.000283305
43	PC(16:0e/22:5)	0.99884	794.597	446.925	4.57478e-09	0.000148322	1.46536e-09	0.000102751	0.000137138	0.000174633	0.000182944	0.000196642	0.000186641	0.000197446	0.000167219	0.00018444	0.000175955	0.000211255	0.000185625	0.000148867	0.000189367	0.000113353	0.000145361	0.000161651	0.000150481	0.000165742	0.000172072	1.22256e-09	0.000174033	0.000131101	0.000147419	0.000161013	1.19335e-09	0.000140583	1.19971e-09	0.000181735	0.000170608	0.000192004	0.000239646	0.000208324	0.000189482	0.000195952	0.000242561	0.000131741	1.32969e-09	0.000142201	0.00178136	0.000160392	0.000161912
153	PC(16:1/16:1)	0.97307	730.537	371.398	0.000522858	0.000522006	1.46536e-09	0.00051077	0.00027711	0.000360857	0.000342845	0.000404752	0.000369433	0.000253103	0.000411511	0.000232649	0.000346761	0.000504713	0.000395752	0.000587659	0.000321361	0.00032293	0.000335087	0.000457865	0.000374001	1.30829e-09	0.000347185	0.000309782	0.000359233	0.000508133	0.000402808	0.000339099	0.000425936	0.000404754	0.00036845	0.000473998	0.000368022	0.000416577	0.000357047	0.000389629	1.18155e-09	0.000592043	0.00036283	0.000485664	0.00029439	0.000360279	0.00042103	0.00041098	0.000417523
611	PC(16:1/18:2)	0.830041	800.545	379.789	0.000157153	8.897e-05	4.77372e-05	9.08354e-05	6.54296e-05	5.51082e-05	6.36215e-05	5.85472e-05	5.19894e-05	4.99708e-05	6.6223e-05	4.41758e-05	6.48306e-05	6.9806e-05	6.09137e-05	9.72878e-05	5.68272e-05	5.82809e-05	6.527e-05	6.66639e-05	6.8982e-05	1.30829e-09	5.45772e-05	4.50443e-05	7.45799e-05	6.96658e-05	7.70257e-05	6.5304e-05	6.50088e-05	6.34349e-05	5.67334e-05	7.04368e-05	5.08865e-05	6.86954e-05	5.36855e-05	8.1954e-05	7.77991e-05	9.1535e-05	6.54687e-05	8.65475e-05	6.77839e-05	6.43084e-05	5.98798e-05	6.50248e-05	6.83586e-05
197	PC(16:1/22:6)	0.960118	804.553	341.819	6.51729e-05	8.38699e-05	0.000175495	5.87745e-05	6.20351e-05	5.40639e-05	7.84007e-05	9.31552e-05	0.000145539	6.677e-05	5.69738e-05	4.67846e-05	4.64359e-05	0.000103883	9.63264e-05	1.27075e-09	3.67596e-05	0.000181027	5.40832e-05	8.87036e-05	7.97128e-05	1.30829e-09	9.60167e-05	7.69063e-05	4.71842e-05	6.37827e-05	4.83878e-05	0.000103004	9.02888e-05	9.53156e-05	4.93735e-05	9.16991e-05	6.97604e-05	8.11964e-05	9.71012e-05	6.62197e-05	9.85034e-05	0.000109572	6.64074e-05	2.65032e-05	1.32969e-09	6.88612e-05	7.55117e-05	7.84375e-05	7.9944e-05
164	PC(16:1/26:4)	0.968973	864.647	498.762	5.35821e-05	3.28e-05	6.11092e-05	5.4796e-05	3.44602e-05	3.94679e-05	3.9551e-05	4.13571e-05	1.18992e-09	3.89534e-05	5.82692e-05	2.51076e-05	3.73775e-05	4.84411e-05	4.47466e-05	4.42784e-05	5.18091e-05	3.13166e-05	6.99766e-05	4.88478e-05	4.28124e-05	4.96441e-05	2.71652e-05	2.61191e-05	2.94238e-05	4.94946e-05	3.60462e-05	4.50499e-05	3.59778e-05	4.31523e-05	6.32961e-05	3.83498e-05	4.58076e-05	7.20971e-05	4.12829e-05	3.63797e-05	1.18155e-09	6.27418e-05	3.47699e-05	3.14842e-05	1.32969e-09	3.84142e-05	5.31798e-05	3.47431e-05	5.06467e-05
560	PC(16:1e/18:2)	0.867922	786.564	454.754	9.67144e-05	3.8207e-05	4.00392e-05	3.2806e-05	3.26964e-05	3.63184e-05	4.59414e-05	2.99125e-05	3.85788e-05	5.14389e-05	4.64722e-05	3.91716e-05	2.72027e-05	4.19352e-05	3.84564e-05	3.61876e-05	3.44106e-05	4.81727e-05	4.32049e-05	3.27303e-05	4.15299e-05	5.57576e-05	3.27465e-05	3.10221e-05	3.39373e-05	3.09272e-05	4.35444e-05	3.59289e-05	4.35988e-05	3.23248e-05	3.70447e-05	2.95109e-05	3.23792e-05	3.61636e-05	3.98669e-05	3.84844e-05	1.18155e-09	5.09908e-05	4.07326e-05	5.76131e-05	4.02593e-05	3.71417e-05	3.72814e-05	3.86484e-05	3.84158e-05
310	PC(16:1e/20:4)	0.933663	810.525	467.256	0.000297305	0.000135626	0.000111287	0.000122949	0.000129914	0.000126532	0.000129615	0.000105439	8.02732e-05	0.000131621	0.000116481	8.00928e-05	0.000100032	0.000118867	0.000128628	0.000122098	0.000107393	9.67227e-05	0.000125579	0.000119641	0.000124305	0.000122258	0.000122823	0.000100127	0.000118055	8.93288e-05	0.00014181	0.00010053	0.000133605	9.35226e-05	9.96365e-05	0.00010922	0.000111067	0.00010056	0.000107206	0.000112438	0.000128406	0.000144217	0.000110779	0.000104763	0.000131581	0.000114097	9.97584e-05	0.000109459	0.000106929
331	PC(16:1e/22:4)	0.920423	838.598	493.831	0.000140216	6.22407e-05	0.000119272	4.38316e-05	5.68847e-05	6.26078e-05	9.9989e-05	8.07892e-05	0.000106927	9.08481e-05	0.000105035	9.49883e-05	8.86252e-05	6.71944e-05	7.20331e-05	6.77698e-05	8.29312e-05	7.90896e-05	8.58191e-05	9.71832e-05	8.52137e-05	0.000112436	6.20521e-05	0.00010375	4.15286e-05	7.41631e-05	5.86196e-05	8.52926e-05	4.94302e-05	7.33143e-05	9.067e-05	6.25957e-05	7.6168e-05	0.000102796	8.3229e-05	6.36576e-05	9.54211e-05	6.6866e-05	8.95601e-05	7.16601e-05	8.04318e-05	7.71821e-05	7.11951e-05	7.74718e-05	7.71074e-05
76	PC(16:1e/22:6)	0.991811	790.557	209.996	0.000326458	7.1693e-05	1.32947e-05	8.81719e-05	7.25992e-05	9.49208e-05	3.77124e-05	5.28292e-05	2.28247e-05	1.46872e-05	8.84817e-05	2.47226e-05	0.000115188	3.97277e-05	4.41912e-05	1.27075e-09	4.23264e-05	4.96161e-05	5.06406e-05	5.00969e-05	6.50092e-05	7.12032e-05	0.000157114	5.63029e-05	4.69416e-05	8.06742e-05	6.23933e-05	2.46883e-05	1.19335e-09	2.03726e-05	8.73068e-05	2.13474e-05	2.71866e-05	2.09541e-05	3.51749e-05	5.55264e-05	3.46277e-05	2.14479e-05	4.12478e-05	0.000139617	3.48963e-05	5.19512e-05	0.000119539	4.09752e-05	4.6441e-05
740	PC(16:2/22:6)	0.733244	802.534	369.557	4.57478e-09	0.000163073	0.000100171	0.000148194	0.000102574	0.000171434	0.000168	0.00013645	1.18992e-09	0.000132518	0.000108006	3.23657e-05	0.000127283	0.000190246	0.000137448	0.000121085	9.07872e-05	5.61879e-05	0.000115706	0.000141903	0.000112172	0.000170431	0.000111111	0.000162981	0.000131434	0.000143253	0.000106222	0.000236847	0.000163918	0.000137518	0.000161628	0.000174928	0.000150027	0.000182315	0.000111287	0.000118764	0.000153597	0.000139633	0.000151918	0.000110485	0.000111007	0.000146465	0.000129366	0.000134924	0.000168683
205	PC(16:2/26:4)	0.958477	862.621	502.118	2.44982e-05	8.98021e-06	2.28219e-05	1.33944e-05	9.30158e-06	1.47193e-05	1.1718e-05	1.68556e-05	1.19779e-05	1.47673e-05	1.58909e-05	1.06114e-05	1.42886e-05	1.33768e-05	7.81235e-06	1.08837e-05	1.91729e-05	1.332e-05	2.07697e-05	8.83486e-06	1.41998e-05	1.50216e-05	8.5495e-06	1.22164e-05	9.71619e-06	2.14262e-05	1.07936e-05	1.53392e-05	1.34913e-05	2.26219e-05	1.47237e-05	1.16561e-05	1.7249e-05	2.06759e-05	1.74898e-05	1.16109e-05	1.56709e-05	1.63628e-05	1.33551e-05	1.6019e-05	7.69936e-06	1.45844e-05	1.15369e-05	1.44798e-05	1.6687e-05
60	PC(16:2e/2:0)	0.996138	520.332	43.5327	3.87781e-06	1.18523e-06	1.14488e-06	1.23884e-06	9.68419e-07	1.62945e-06	7.23647e-07	1.06231e-06	1.11361e-06	1.18228e-06	1.03097e-06	9.12693e-07	1.12977e-06	1.22165e-06	8.52886e-07	1.48244e-06	1.34746e-06	1.26485e-06	1.00488e-06	1.34337e-06	1.28587e-06	1.09819e-06	1.40393e-09	1.09577e-06	1.52621e-06	1.16847e-06	1.82803e-06	1.15893e-06	1.2607e-06	1.05572e-06	1.04275e-06	1.11335e-06	1.04564e-06	1.17248e-06	9.10832e-07	1.19848e-06	1.25011e-06	1.17036e-06	1.02174e-06	1.48266e-06	1.35147e-06	1.14767e-06	1.30598e-06	1.21381e-06	1.20882e-06
51	PC(16:2e/22:6)	0.997641	788.542	388.948	0.000722198	0.000281516	0.000278883	0.000314382	1.47131e-09	0.000345311	0.000292539	0.000279945	0.000271207	0.000267932	0.00030138	0.000287626	0.000284812	0.000172294	0.000268163	0.000256871	0.00045079	1.50377e-09	1.32309e-09	0.000238903	0.000265738	0.000304748	0.00029874	0.000291562	0.000345729	0.000298898	1.46205e-09	0.000224625	0.000295784	0.000251211	0.000280454	0.000221061	0.000461323	0.00025149	0.000238732	0.000297421	1.18155e-09	0.000231056	1.27449e-09	1.81728e-09	0.000260025	0.000227643	0.000617011	0.000249219	0.000268657
191	PC(16:3/24:4)	0.961525	832.575	366.388	0.000115638	0.00028848	0.000229501	0.000243926	0.000198458	0.000274624	0.000277404	0.000338183	0.000525134	0.000408886	0.00031753	0.00020771	0.000169316	0.000378744	0.000198608	0.00025506	0.000190406	0.000222396	0.00026322	0.000407047	0.000275514	0.000320666	0.000272283	0.00038385	0.000212164	0.000264537	0.000273561	0.000489051	0.00029026	0.000357185	0.000376602	0.000411465	0.000285434	0.000613811	0.000352083	0.000254425	0.000597606	0.000575161	0.000231354	0.000145826	0.000219764	0.000346354	0.00031782	0.000320199	0.000332323
174	PC(16:3/26:4)	0.966158	860.615	451.975	1.60809e-05	1.9761e-05	3.77077e-05	1.74973e-05	1.83784e-05	2.34295e-05	2.50247e-05	2.76838e-05	3.0969e-05	3.58902e-05	3.75379e-05	2.7344e-05	2.44428e-05	2.97348e-05	3.17421e-05	2.43781e-05	2.60714e-05	2.15183e-05	2.40358e-05	3.33497e-05	2.66289e-05	2.64815e-05	2.19716e-05	2.71115e-05	2.15779e-05	2.84265e-05	2.28248e-05	2.8448e-05	1.94966e-05	2.43393e-05	3.21948e-05	2.47585e-05	2.29766e-05	1.21068e-09	1.29905e-09	2.14188e-05	3.29203e-05	3.0614e-05	2.75875e-05	2.2705e-05	2.87794e-05	2.32318e-05	2.96654e-05	2.72247e-05	2.74696e-05
299	PC(16:4/20:5)	0.938506	772.51	237.474	1.74631e-05	1.4751e-05	2.22359e-07	1.38136e-05	1.3486e-05	8.45628e-06	3.2398e-06	1.3558e-05	5.99079e-06	1.52309e-06	1.21841e-05	4.2617e-06	1.02926e-05	5.96164e-06	1.07781e-05	1.10513e-05	6.15368e-06	7.87354e-06	3.36505e-06	5.4325e-06	8.49291e-06	1.04947e-05	1.16045e-06	8.8416e-06	8.3788e-07	1.2959e-05	8.9478e-06	3.71421e-06	1.19335e-09	1.05674e-06	3.53851e-06	3.10518e-06	5.85257e-06	7.70327e-06	9.57093e-06	8.11738e-06	6.32314e-06	1.31319e-06	6.99737e-06	4.8521e-06	9.52685e-06	5.7457e-06	7.68433e-06	7.8658e-06	7.56267e-06
190	PC(16:4/26:4)	0.962104	858.584	267.094	1.7289e-05	1.33048e-05	2.27025e-06	1.31922e-05	1.47131e-09	1.12623e-05	5.02733e-06	1.17776e-05	5.82191e-06	1.66195e-06	1.19971e-05	5.43049e-06	8.50049e-06	5.29597e-06	7.61079e-06	8.55894e-06	7.83235e-06	9.36598e-06	1.94806e-06	7.42327e-06	7.77862e-06	7.70995e-06	7.96719e-06	7.02581e-06	6.08079e-06	1.28533e-09	8.68133e-06	2.8688e-06	1.19335e-09	2.5473e-06	4.52992e-06	3.54633e-06	6.66562e-06	8.37676e-06	7.60912e-06	7.70512e-06	4.97396e-06	1.19325e-06	8.36674e-06	7.10738e-06	8.03848e-06	5.54982e-06	6.57789e-06	7.1293e-06	7.6743e-06
161	PC(17:0/20:4)	0.97062	840.602	455.242	3.90641e-05	2.81968e-05	2.96027e-05	1.80575e-05	2.84515e-05	2.37431e-05	3.7537e-05	2.94652e-05	3.15487e-05	3.60347e-05	2.91978e-05	2.19789e-05	2.18253e-05	2.61445e-05	3.21137e-05	1.97631e-05	2.08833e-05	3.07865e-05	2.85245e-05	3.18904e-05	2.82405e-05	2.54094e-05	3.00224e-05	1.22256e-09	1.69502e-05	2.75086e-05	2.12038e-05	2.97253e-05	2.52372e-05	2.33008e-05	3.33816e-05	2.35483e-05	2.51118e-05	3.44309e-05	2.99526e-05	2.32084e-05	3.60534e-05	3.19918e-05	3.48326e-05	2.0515e-05	2.90723e-05	2.60729e-05	2.5458e-05	2.70673e-05	2.64288e-05
248	PC(17:0/22:6)	0.948189	820.584	427.284	8.64843e-06	1.57517e-05	1.89876e-05	4.20671e-06	1.75364e-05	1.77869e-05	1.61279e-05	2.22709e-05	3.07921e-05	2.66337e-05	1.68134e-05	3.3831e-05	2.27364e-05	1.87386e-05	2.01082e-05	2.70411e-05	1.77467e-05	1.55814e-05	1.742e-05	1.14476e-05	1.90103e-05	3.00966e-05	1.79131e-05	3.16749e-05	1.32915e-05	2.32231e-05	1.71275e-05	1.22871e-05	1.18413e-05	1.79729e-05	2.3674e-05	1.68938e-05	2.21677e-05	2.96539e-05	2.75169e-05	2.44136e-05	3.29852e-05	1.88521e-05	3.10473e-05	2.18145e-05	1.66622e-05	2.20555e-05	2.04596e-05	1.83899e-05	2.25595e-05
175	PC(17:1/17:1)	0.965236	758.567	424.374	4.57478e-09	0.0302834	0.0286852	0.0337884	0.0351527	0.0309348	0.0287077	0.0255367	0.0245776	0.0324397	0.0292692	0.0261805	0.0265777	0.0298085	0.0277158	0.0348689	0.0287704	0.0305494	0.030765	0.0308501	0.0282731	0.0384667	0.0297338	0.0285045	0.0307002	0.0273264	0.0356787	0.0286948	0.0348964	0.0298977	0.026864	0.0290451	0.0276136	0.0263408	0.0244188	0.0312873	0.033271	1.27249e-09	0.0299175	0.0367344	0.0322263	0.0290809	0.0315862	0.0299712	0.0285645
154	PC(17:2/17:2)	0.973054	754.536	360.655	4.57478e-09	0.000246277	9.53103e-05	0.000212162	0.000170617	0.000233302	0.000265187	0.000274384	0.000308578	0.000111606	0.000182896	0.00019397	0.000210306	0.000317453	0.000247815	0.000238669	0.000200836	0.000223734	0.000137955	0.000249854	0.000206046	1.30829e-09	0.000221469	0.000219376	0.000252871	0.000274809	0.000196777	0.000244163	0.000304006	0.000325694	0.000206308	0.000315028	0.000294989	0.000287019	0.000199059	0.000246943	0.000355769	0.000351205	0.000197309	0.00019906	0.000152243	0.000242205	0.000232847	0.000233329	0.000238744
355	PC(18:0/18:1)	0.907538	832.569	505.199	4.57478e-09	0.000123253	8.44554e-05	8.95131e-05	0.000128588	9.66016e-05	0.000127537	0.000100082	7.81017e-05	0.000100851	0.000112097	9.87247e-05	9.31216e-05	9.37205e-05	0.000126672	9.08153e-05	9.4282e-05	0.0001293	0.000100702	0.000108256	9.88339e-05	0.000114676	0.000107348	0.000150448	9.95556e-05	8.0935e-05	8.96872e-05	0.000119044	0.00012688	8.36824e-05	0.000129693	9.01461e-05	0.000117249	9.35533e-05	0.000102135	0.000108921	0.000139016	0.000127046	0.000125189	7.55641e-05	0.000128252	0.000110451	9.20808e-05	0.00010428	9.84923e-05
644	PC(18:0/18:2)	0.809203	830.551	495.519	0.000124647	3.90167e-05	2.60227e-05	5.76476e-05	5.77172e-05	6.11551e-05	7.22076e-05	5.0631e-05	4.34184e-05	5.51474e-05	7.06222e-05	0.000100895	2.85492e-05	5.31095e-05	6.32126e-05	6.36664e-05	3.65839e-05	6.81623e-05	3.0952e-05	2.17786e-05	5.62571e-05	6.89559e-05	2.91847e-05	2.55537e-05	3.16187e-05	4.84823e-05	7.23079e-05	3.71225e-05	5.40698e-05	1.34107e-09	7.10916e-05	4.64239e-05	5.56308e-05	4.10759e-05	4.58735e-05	6.28332e-05	6.33838e-05	7.67053e-05	5.09245e-05	5.02246e-05	4.96191e-05	4.90542e-05	5.3332e-05	5.30135e-05	2.24119e-05
846	PC(18:0/18:5)	0.571373	824.544	353.26	3.00781e-05	1.96654e-05	1.21622e-05	1.8137e-05	1.53262e-05	1.32178e-05	1.39867e-05	1.54275e-05	1.35084e-05	1.83894e-05	1.39101e-05	7.26307e-06	1.0939e-05	1.61257e-05	1.80206e-05	2.08754e-05	1.0083e-05	1.3627e-05	1.30638e-05	1.71693e-05	1.55488e-05	1.96241e-05	1.9098e-05	1.22256e-09	1.12148e-05	1.09811e-05	1.31345e-05	1.79338e-05	1.54557e-05	1.60299e-05	9.21588e-06	1.30467e-05	1.34704e-05	1.17537e-05	1.59577e-05	1.71419e-05	2.18413e-05	2.45533e-05	1.63018e-05	1.22102e-05	1.47873e-05	1.46877e-05	1.40174e-05	1.4831e-05	1.61114e-05
362	PC(18:0/20:2)	0.905747	858.624	526.294	0.000122941	5.43073e-05	5.86349e-05	6.88816e-05	6.56553e-05	5.84279e-05	5.02596e-05	4.18788e-05	4.99645e-05	6.74347e-05	6.02296e-05	4.77238e-05	4.31463e-05	7.53506e-05	5.23438e-05	6.46004e-05	6.10175e-05	5.16138e-05	5.232e-05	5.24456e-05	5.99589e-05	1.30829e-09	4.68168e-05	5.34646e-05	6.21597e-05	6.66348e-05	8.42748e-05	6.76671e-05	6.22255e-05	7.03337e-05	5.03506e-05	4.81321e-05	5.21255e-05	7.17812e-05	6.08548e-05	7.08979e-05	7.62617e-05	8.75542e-05	6.89754e-05	6.65574e-05	5.8087e-05	6.12578e-05	5.6909e-05	6.28153e-05	6.56268e-05
544	PC(18:0/20:3)	0.873612	856.606	491.174	0.000694772	0.000583078	0.000323214	0.000517912	0.000937995	0.000319429	0.000597582	0.000374733	0.000466614	0.000480504	0.000960278	0.000408432	0.000617362	1.13128e-09	0.000774342	0.000412092	0.000554259	0.000565888	0.000420898	0.000441071	0.000522523	0.000763437	0.000820229	0.000889487	0.000667587	0.00108485	0.000570615	0.000660505	0.00105933	0.000570017	0.000436538	0.000457806	0.00108728	0.000491638	0.000720031	0.000703754	0.000684235	0.000761291	1.27449e-09	0.000575813	0.000901124	0.000695278	0.000925833	0.000966263	0.000984769
151	PC(18:0/20:4)	0.974139	854.589	466.184	4.57478e-09	0.00166741	0.00176314	0.00186242	0.00184722	0.00211155	0.00196981	0.0016073	0.00227588	0.00193055	0.00190383	0.00193678	0.00149277	0.00176403	0.00144206	0.00150334	0.00179745	0.00193302	0.00157518	0.00159852	0.00169911	0.0018658	0.00165281	0.00207657	0.00211459	0.00194447	0.00194899	1.21998e-09	0.00197379	0.00204619	0.00174435	0.00181442	0.00210495	0.00191398	0.0017652	0.00190355	0.00201987	0.00188671	0.00165704	0.00207576	0.00141473	0.00179619	0.0017139	0.00178117	0.00172519
229	PC(18:0/22:4)	0.953074	882.624	517.457	3.98519e-05	1.42345e-05	2.39327e-05	1.81047e-05	1.63107e-05	1.9395e-05	1.60914e-05	1.38527e-05	1.89492e-05	1.65318e-05	1.68805e-05	1.78953e-05	1.46825e-05	1.30205e-05	1.12151e-05	1.36847e-05	2.07791e-05	1.77532e-05	1.7065e-05	1.50756e-05	1.77653e-05	1.64174e-05	1.52285e-05	1.75795e-05	1.34089e-05	2.1798e-05	1.62607e-05	1.79049e-05	1.74138e-05	2.19396e-05	1.63597e-05	1.87101e-05	1.86638e-05	1.21068e-09	1.84703e-05	1.71552e-05	2.0956e-05	2.01869e-05	1.40642e-05	1.76823e-05	1.43719e-05	1.67287e-05	1.62002e-05	1.51689e-05	1.53877e-05
185	PC(18:0/22:5)	0.962805	836.616	468.493	4.57478e-09	0.000296081	1.46536e-09	0.000277745	0.000273701	0.00029944	0.00027521	0.000340504	1.18992e-09	0.000299561	0.000288539	1.49885e-09	0.000276233	0.000313742	0.000289776	0.000263257	0.000280932	0.000286637	0.000318135	0.000286003	0.000233275	0.000321143	0.000262178	0.000336178	0.000246452	0.000389024	0.000271381	0.000332452	0.000281318	0.000332938	0.000304784	0.000327896	0.000310978	1.21068e-09	0.000387255	0.000287787	0.00029883	0.000304531	0.000287765	0.000313279	0.000301412	0.000294879	0.000321083	0.000305963	0.000306822
208	PC(18:0/22:6)	0.958034	834.6	451.515	0.00178613	0.000548079	0.000611737	0.000405577	0.000664931	0.000583533	0.000657063	0.000702901	0.000888526	1.24641e-09	0.000940758	0.00105327	0.00105324	0.000928213	0.00102756	0.000641178	0.00126009	0.000706934	0.00060565	0.000586381	0.000782588	0.00135083	0.000612594	1.22256e-09	0.00073563	0.000677824	0.000685249	0.000689613	0.00104474	0.00104149	0.000895788	0.00071787	0.000740418	0.00113397	0.000961064	0.00101135	1.18155e-09	1.27249e-09	0.00153444	0.000840767	0.00101698	0.000784531	0.000800975	0.00125644	0.000767726
903	PC(18:0e/18:2)	0.496601	816.611	510.51	3.12159e-05	3.13372e-05	2.081e-05	1.56178e-05	3.10604e-05	3.63608e-05	3.35517e-05	2.83757e-05	2.94241e-05	2.11451e-05	3.96376e-05	2.60477e-05	1.88517e-05	3.5461e-05	4.03675e-05	3.63295e-05	1.50012e-05	3.59236e-05	1.72249e-05	3.5353e-05	2.89548e-05	4.40072e-05	3.4418e-05	2.4042e-05	1.19947e-05	2.75322e-05	1.84372e-05	1.31162e-05	1.41677e-05	1.36099e-05	3.1944e-05	2.36312e-05	1.40954e-05	2.73752e-05	2.68787e-05	1.5139e-05	2.67241e-05	4.98896e-05	4.2847e-05	3.70667e-05	3.42596e-05	2.65588e-05	2.98626e-05	2.08273e-05	3.30358e-05
304	PC(18:0e/20:4)	0.936405	840.612	492.196	5.11808e-05	2.69524e-05	3.68485e-05	2.67507e-05	2.33128e-05	3.33895e-05	3.91982e-05	3.54419e-05	3.32463e-05	3.54135e-05	3.81643e-05	3.02767e-05	3.31716e-05	2.61494e-05	3.31112e-05	2.84583e-05	3.48864e-05	3.43929e-05	3.51529e-05	3.4283e-05	3.34891e-05	3.60039e-05	2.70013e-05	3.9881e-05	2.52075e-05	3.04063e-05	2.28464e-05	2.97931e-05	3.01767e-05	3.47061e-05	3.89592e-05	2.6199e-05	3.34264e-05	3.68912e-05	3.13898e-05	2.15202e-05	4.40142e-05	3.77648e-05	3.68532e-05	3.15047e-05	2.66675e-05	3.20606e-05	3.19289e-05	3.19667e-05	3.34672e-05
44	PC(18:0e/22:6)	0.998654	820.61	441.845	1.06288e-05	1.70717e-05	1.84263e-05	1.6836e-06	1.08599e-05	1.35175e-05	2.34839e-05	2.61212e-05	2.72799e-05	9.35487e-06	5.81467e-06	1.77572e-05	2.01599e-05	2.04608e-05	7.43998e-06	1.3189e-05	1.52422e-05	2.1466e-05	5.22686e-06	2.21363e-05	1.5366e-05	2.31427e-05	2.17781e-05	1.22256e-09	7.69054e-06	1.3607e-05	1.60145e-05	1.63123e-05	1.85736e-05	1.43057e-05	3.02353e-05	1.66676e-05	1.97712e-05	3.18272e-05	1.10312e-05	1.71795e-05	3.57027e-05	2.94573e-05	1.27449e-09	5.26214e-06	2.72262e-05	1.77893e-05	2.3543e-05	1.96152e-05	2.0298e-05
177	PC(18:1/18:1)	0.964328	786.591	437.96	4.57478e-09	0.00171671	0.00189215	0.00146584	0.00241575	0.00206853	0.00226503	0.00186521	0.00195729	0.00224746	0.00219921	0.0013195	0.00208315	0.00208887	0.00227822	0.00145146	0.00239614	0.00215019	0.00141332	0.00235101	0.00188125	0.00302292	0.00227441	0.001337	0.00272236	0.00239311	0.00238359	0.00277889	0.00191091	0.00251611	0.00207342	0.0016502	0.00177939	0.00220273	0.00245178	0.00272242	0.00161567	0.00211799	0.00263985	0.00224298	0.00285205	0.00228439	0.0024274	0.00234097	0.00225698
390	PC(18:1/20:2)	0.895319	856.599	466.074	4.57478e-09	0.000243855	0.000261898	0.000279375	0.000320876	0.00031265	0.000288718	0.000235869	0.000336904	0.000287454	0.000283366	0.000336794	0.000258024	0.000266877	0.000208423	0.000233441	0.000271376	0.000329985	0.000231308	0.000268108	0.000262765	0.00028289	0.000259607	0.000306199	0.000244429	0.000303365	0.000295417	0.000284423	0.000289239	0.000324909	0.000298776	0.000325357	0.000313646	0.000285603	0.000261342	0.000280141	0.000301858	0.000282715	0.000257414	0.000375385	0.000211987	0.000289235	0.00028994	0.000264164	0.00026404
395	PC(18:1/20:3)	0.893882	854.589	444.992	4.57478e-09	0.000420255	0.000339742	0.000325823	0.000319228	1.35098e-09	0.000374357	0.000301777	0.000315232	0.000311479	0.000317567	0.000313498	0.00046463	0.000451127	0.000352321	0.000318396	0.000348849	0.00032749	0.000347784	0.000330725	0.000314014	0.000452505	0.000335492	0.000297575	0.000407674	0.000419409	0.000344595	0.000485721	0.000357289	0.000361273	0.000326437	0.000366271	0.000393605	0.00038023	0.000469502	0.000417512	0.000406766	0.000444961	0.000385176	1.81728e-09	0.000398583	0.000372529	0.000349134	0.000360475	0.000354462
168	PC(18:1/20:4)	0.96805	852.573	436.801	1.96084e-05	7.3428e-06	1.09364e-05	7.03014e-06	0.000111318	9.87962e-06	0.000147961	0.00013963	0.000132473	0.000109279	0.000120521	1.11019e-05	6.46224e-06	0.000116427	1.2518e-05	0.000139279	7.06981e-06	0.000125206	1.3042e-05	7.06485e-06	6.27075e-05	0.000147442	9.19466e-06	1.24813e-05	1.0416e-05	0.000124062	0.000122069	9.71179e-06	1.12203e-05	0.000138477	1.24921e-05	0.000126106	0.00012712	0.000134114	8.36016e-06	1.17348e-05	0.00013146	8.92327e-06	0.00012023	0.000127644	9.08783e-05	7.42069e-05	8.79805e-06	8.07127e-06	0.000122297
332	PC(18:1e/18:2)	0.919423	814.593	466.727	4.03271e-05	1.79227e-05	1.72976e-05	1.72022e-05	1.66626e-05	1.67417e-05	2.26285e-05	1.42473e-05	1.41296e-05	1.24641e-09	2.2759e-05	1.03177e-05	1.14481e-05	1.70346e-05	2.19427e-05	1.78499e-05	1.22845e-05	1.81767e-05	1.82192e-05	2.0151e-05	1.73672e-05	1.78626e-05	1.58377e-05	1.5381e-05	1.1358e-05	1.23809e-05	1.77847e-05	1.31689e-05	1.57381e-05	1.27878e-05	1.40495e-05	1.00024e-05	1.34056e-05	1.5221e-05	1.79344e-05	1.84271e-05	1.18155e-09	2.19629e-05	1.70488e-05	1.49e-05	1.6419e-05	1.45836e-05	1.83106e-05	1.67441e-05	1.72449e-05
549	PC(18:1e/20:4)	0.870843	838.547	477.604	1.03785e-05	1.55989e-05	1.14007e-06	8.78141e-06	1.28256e-05	3.92466e-06	1.08217e-05	7.02974e-06	6.9766e-06	6.79369e-06	4.60778e-06	5.30088e-06	1.31474e-05	1.18831e-05	9.29122e-06	5.21285e-06	9.71642e-06	8.1207e-06	7.34751e-06	9.89583e-06	8.43973e-06	6.4774e-06	9.74529e-06	3.93885e-06	1.50375e-05	9.38392e-06	1.19015e-05	1.4296e-05	1.15728e-05	1.00935e-05	7.29356e-06	1.19378e-05	1.47437e-05	9.15252e-06	1.41116e-05	1.15287e-05	1.18155e-09	1.37266e-05	1.19674e-05	7.64308e-06	1.35329e-05	1.04043e-05	9.61351e-06	8.62704e-06	5.38781e-06
56	PC(18:1e/22:6)	0.996319	818.588	268.043	0.000123598	2.2582e-05	4.94229e-06	3.65877e-05	1.98279e-05	2.07099e-05	1.12934e-05	1.52675e-05	6.43504e-06	4.82732e-06	2.18029e-05	8.38771e-06	3.38994e-05	3.79579e-05	1.19763e-05	5.30153e-05	1.39035e-05	1.64513e-05	1.19776e-05	3.45579e-05	2.55e-05	2.10159e-05	1.49014e-05	3.3922e-05	1.2263e-05	1.80299e-05	6.01687e-05	5.87477e-06	1.87296e-05	7.05255e-06	1.25372e-05	5.22e-06	1.16022e-05	7.58361e-06	3.00842e-05	4.46445e-05	1.23331e-05	7.49602e-06	1.45323e-05	4.61268e-05	4.19241e-05	2.13021e-05	1.23125e-05	1.27782e-05	1.08468e-05
182	PC(18:2/18:2)	0.963249	782.559	367.539	0.000119943	0.000200866	0.00012216	0.000132068	0.000130358	0.000134173	0.000163875	0.00015875	0.000254072	0.000125731	8.79664e-05	0.000153361	0.000145452	0.000201	7.74583e-05	0.000187159	0.000126674	0.000143032	0.000126269	0.000173792	0.000148208	0.000228373	0.000124384	0.000102608	0.000148595	0.000170704	0.000122055	0.000204785	0.000218549	0.00015085	0.00011572	0.000214852	0.00016403	0.000223063	0.000140024	0.000149839	0.000199732	0.000195843	0.000158186	0.000113482	8.29137e-05	0.000161429	9.73819e-05	0.00018183	0.000163152
193	PC(18:2/20:2)	0.96108	854.582	419.465	4.57478e-09	0.000111383	0.000136919	0.000101908	0.000106335	0.000121276	0.00012433	0.000125599	1.18992e-09	0.000102162	0.000126684	0.000130009	0.000130709	0.000106067	0.000109382	0.000108286	9.9961e-05	0.000100941	0.000113651	0.000137869	0.000104674	0.000105645	0.000126438	0.000116723	0.000100134	0.000152346	0.000114262	0.000136979	9.5341e-05	0.000127043	0.000117657	0.000139081	0.000154081	0.00014622	0.000123827	9.97193e-05	0.000128172	0.000105934	9.65172e-05	0.000104723	0.000106029	0.000119844	0.000118659	0.000129388	0.000112377
325	PC(18:2/20:3)	0.923632	852.573	404.585	4.57478e-09	0.000247669	0.000146952	0.000179974	0.000185839	0.000130026	0.000254326	0.000183435	0.000171006	0.000225967	0.000178339	0.000164556	0.000281244	1.13128e-09	0.000193121	0.000211123	0.000180535	0.000173663	0.000193881	0.000214403	0.000175803	0.000287962	0.000225023	0.000188594	0.000249127	0.000190596	0.000222336	0.00033528	0.000214211	0.000212939	0.000167628	0.000221991	0.000303361	0.000204793	0.000330153	0.000242453	0.000294856	1.27249e-09	0.000270218	0.000175632	0.000258936	0.000229804	0.000208037	0.000213288	0.000227078
157	PC(18:2/20:4)	0.971924	850.484	330.019	4.57478e-09	7.68798e-07	2.85188e-07	7.57501e-07	6.41217e-07	4.94347e-07	2.93918e-07	4.36189e-07	6.5766e-07	2.81223e-07	6.9056e-07	1.34226e-07	2.16524e-07	1.0651e-07	2.25113e-07	2.62654e-07	1.71996e-07	1.50377e-09	2.61727e-07	6.43513e-07	3.66747e-07	9.41989e-07	3.26582e-07	6.35404e-07	2.44817e-07	3.74878e-07	2.04117e-07	4.73258e-07	9.445e-07	1.34107e-09	5.61978e-07	1.26938e-09	2.05668e-07	4.02777e-07	2.62532e-07	7.44809e-08	5.35753e-07	5.95232e-07	1.03498e-07	1.81728e-09	3.14558e-07	3.60323e-07	5.41914e-07	3.40013e-07	4.7932e-07
688	PC(18:2/22:5)	0.769352	876.576	407.058	6.13189e-05	5.97449e-05	6.09448e-05	2.86792e-05	4.14893e-05	4.42343e-05	5.97964e-05	6.97173e-05	7.90095e-05	6.56132e-05	8.12375e-05	6.85542e-05	6.41665e-05	6.72366e-05	7.09545e-05	6.22461e-05	5.23066e-05	5.1971e-05	5.65175e-05	5.89289e-05	6.02334e-05	7.27628e-05	6.11941e-05	6.83131e-05	5.17677e-05	5.51236e-05	5.70755e-05	6.94091e-05	4.3593e-05	5.38812e-05	7.90772e-05	5.83111e-05	5.29755e-05	1.21068e-09	9.5272e-05	6.47781e-05	8.86369e-05	8.14763e-05	8.82751e-05	4.99073e-05	5.90545e-05	6.25443e-05	5.92616e-05	5.96225e-05	6.50647e-05
283	PC(18:2e/18:5)	0.942691	762.526	373.057	0.000248026	0.000217085	0.000201159	0.000210901	0.000186056	0.000179551	0.000187629	0.000196487	0.000213238	0.000176841	0.00022192	0.000177448	0.000134599	0.000229104	0.000236559	0.000257565	0.000186768	0.000184541	0.000179271	0.000276323	0.000205054	0.000322496	0.000173002	0.000235089	0.000201709	0.000207039	0.000178712	0.000217413	0.000221113	0.00018586	0.000235661	0.000197965	0.000154994	0.000265287	0.00018045	0.000138968	0.000263798	0.000316072	0.000171367	0.000146727	0.000161102	0.000208741	0.000208987	0.000207685	0.00019081
568	PC(18:2e/20:4)	0.863413	836.581	446.329	8.40746e-05	5.81504e-05	6.01889e-05	4.02415e-05	2.66029e-05	5.10551e-05	6.95444e-05	6.00617e-05	8.45778e-05	4.23506e-05	6.65998e-05	8.44356e-05	5.39128e-05	3.46521e-05	5.68341e-05	5.15854e-05	2.79154e-05	6.14926e-05	7.33922e-05	5.50346e-05	5.71351e-05	7.22556e-05	3.22067e-05	3.48241e-05	3.9754e-05	6.01706e-05	3.49753e-05	5.28088e-05	2.63696e-05	5.48093e-05	6.74466e-05	3.50011e-05	5.29238e-05	7.70025e-05	6.72466e-05	5.30153e-05	4.68945e-05	3.15905e-05	4.29055e-05	6.76546e-05	5.50668e-05	5.02461e-05	3.61158e-05	3.87978e-05	6.17424e-05
47	PC(18:2e/22:6)	0.998226	816.57	248.085	1.99694e-05	1.98914e-05	2.38541e-06	1.81512e-05	1.96015e-05	1.04178e-05	3.23984e-06	1.45855e-05	5.47529e-06	1.98247e-06	8.41053e-06	5.42497e-06	2.04466e-05	8.59643e-06	1.49096e-05	1.3206e-05	7.17668e-06	1.08347e-05	2.96575e-06	1.1585e-05	1.09628e-05	1.30817e-05	1.39681e-05	9.31823e-06	8.2083e-06	1.47084e-05	1.72727e-05	6.03666e-06	1.19335e-09	4.39292e-06	6.56056e-06	6.02313e-06	7.01652e-06	8.68529e-06	7.36826e-06	1.24021e-05	6.20479e-06	3.02915e-06	1.00078e-05	5.97647e-06	7.54595e-06	8.39042e-06	1.03214e-05	1.37214e-05	1.02981e-05
122	PC(18:3/18:3)	0.980391	778.535	347.599	1.3962e-05	2.10956e-05	1.02774e-05	1.38427e-05	1.47787e-05	1.72257e-05	1.94893e-05	2.33069e-05	2.98426e-05	1.54108e-05	2.31078e-05	2.02693e-05	1.99004e-05	2.66202e-05	1.96759e-05	2.77359e-05	1.91975e-05	1.7752e-05	1.45375e-05	2.51227e-05	1.96576e-05	3.7979e-05	1.90814e-05	2.36539e-05	1.81676e-05	2.01407e-05	1.86983e-05	2.316e-05	2.48091e-05	2.44552e-05	2.1121e-05	2.96166e-05	2.2477e-05	2.98853e-05	2.18075e-05	2.39294e-05	3.5368e-05	3.90136e-05	2.71119e-05	1.90832e-05	1.62268e-05	2.47893e-05	2.22104e-05	2.16611e-05	2.39763e-05
240	PC(18:3/20:4)	0.94948	848.543	343.075	3.78318e-05	3.2634e-05	2.50071e-05	1.77817e-05	2.18813e-05	2.33092e-05	3.32967e-05	3.43308e-05	4.01212e-05	2.64836e-05	3.38906e-05	1.96986e-05	1.79874e-05	2.98727e-05	2.93806e-05	2.70114e-05	1.40988e-05	3.52616e-05	1.96654e-05	3.88265e-05	2.79186e-05	2.45773e-05	3.37386e-05	2.52724e-05	1.66949e-05	1.83509e-05	1.85045e-05	3.49379e-05	2.68346e-05	2.85054e-05	2.68264e-05	2.95522e-05	3.44932e-05	2.6648e-05	3.18668e-05	2.28855e-05	4.16644e-05	3.20083e-05	2.52414e-05	1.46989e-05	2.53934e-05	2.69348e-05	2.34753e-05	2.72485e-05	2.5766e-05
145	PC(18:3/22:6)	0.975229	828.537	238.52	5.80576e-06	5.41683e-06	6.72764e-07	5.06477e-06	5.45874e-06	3.09671e-06	8.90423e-07	5.66438e-06	1.85889e-06	2.46396e-07	3.36507e-06	1.45767e-06	4.38934e-06	1.99407e-06	2.23305e-06	3.45297e-06	3.18238e-06	2.36115e-06	4.68301e-07	2.73309e-06	2.99064e-06	2.95566e-06	4.05943e-06	6.10381e-06	2.1215e-06	5.65189e-06	3.89313e-06	9.19965e-07	1.19335e-09	8.90189e-07	1.75935e-06	1.60616e-06	3.33525e-06	2.71685e-06	3.28792e-06	2.11232e-06	1.22559e-06	3.43095e-07	2.60103e-06	1.23917e-06	2.40621e-06	2.46149e-06	2.7015e-06	2.65636e-06	2.87803e-06
857	PC(18:3e/15:0)	0.56228	728.563	396.337	7.03553e-05	1.98227e-05	2.55864e-05	1.28133e-09	2.31266e-05	2.27187e-05	1.93221e-05	1.98779e-05	1.71354e-05	1.83939e-05	2.20943e-05	2.18448e-05	1.78008e-05	1.54965e-05	2.00233e-05	1.62933e-05	2.34642e-05	2.43125e-05	2.08645e-05	1.86283e-05	2.18581e-05	2.18433e-05	2.00672e-05	2.07242e-05	2.00961e-05	2.03365e-05	2.15788e-05	1.70836e-05	2.1089e-05	2.16724e-05	2.03994e-05	1.72369e-05	1.80207e-05	1.88417e-05	1.99688e-05	1.91976e-05	1.84458e-05	1.78302e-05	1.77472e-05	2.49926e-05	2.08627e-05	1.99017e-05	2.0854e-05	1.66966e-05	1.83267e-05
287	PC(18:3e/18:5)	0.942691	760.512	340.271	5.42748e-05	8.52911e-05	9.23357e-05	0.000128622	0.000105346	9.62412e-05	6.99275e-05	8.1929e-05	0.000114299	0.000116105	4.91387e-05	2.5063e-05	5.98719e-05	8.98815e-05	9.44312e-05	0.000142209	6.77147e-05	7.41978e-05	0.000102589	0.000111321	8.80395e-05	0.000187435	6.19244e-05	8.79079e-05	7.58049e-05	7.57837e-05	0.00010102	5.33327e-05	0.000148418	6.42738e-05	0.000109369	0.000109758	5.80032e-05	8.13642e-05	8.03659e-05	8.65711e-05	0.000122428	1.27249e-09	8.27373e-05	7.1022e-05	9.0073e-05	8.73797e-05	0.000110766	4.98899e-05	6.75852e-05
37	PC(18:3e/2:0)	0.9995	546.355	83.9852	6.4511e-05	9.05136e-06	3.54644e-05	4.53251e-05	1.28386e-05	1.35098e-09	0.000124329	2.84807e-05	3.62921e-05	6.5384e-05	1.00878e-05	3.94608e-05	3.78093e-05	0.000141881	1.32527e-09	3.93964e-05	1.22537e-05	0.000119359	3.24693e-05	1.81319e-05	4.36264e-05	1.37467e-05	1.85213e-05	1.90409e-05	2.59686e-05	5.53779e-06	2.3751e-06	0.000126362	2.5694e-05	4.67953e-05	4.12474e-05	7.45671e-05	0.000164243	3.4608e-05	6.22207e-05	7.43508e-05	4.92717e-05	0.000112483	6.79385e-05	0.0001187	0.000127032	6.05352e-05	5.44051e-05	5.162e-05	5.48664e-05
46	PC(18:3e/22:6)	0.998502	814.559	248.208	6.19465e-05	5.3929e-05	8.04505e-06	5.01861e-05	4.50959e-05	4.25044e-05	7.42216e-06	5.23659e-05	1.82491e-05	3.41889e-06	2.7458e-05	1.6766e-05	3.32653e-05	1.77475e-05	2.71566e-05	4.18335e-05	3.11926e-05	2.71078e-05	8.4696e-06	3.69316e-05	3.05546e-05	3.23126e-05	4.57168e-05	3.72517e-05	2.9434e-05	4.67437e-05	3.05571e-05	1.40853e-05	5.80785e-05	1.05697e-05	1.99073e-05	1.92863e-05	3.18548e-05	2.86563e-05	2.92084e-05	3.30048e-05	1.89246e-05	6.46746e-06	2.14239e-05	2.16942e-05	2.71488e-05	2.81163e-05	2.8529e-05	2.94843e-05	2.84594e-05
121	PC(18:4/18:4)	0.980613	774.527	209.144	3.76551e-05	3.64387e-05	6.6739e-06	3.01954e-05	3.34015e-05	2.44924e-05	9.04312e-06	3.21736e-05	1.98829e-05	3.26506e-06	2.30184e-05	1.50992e-05	2.06275e-05	1.20525e-05	3.01028e-05	2.22462e-05	1.61573e-05	2.61829e-05	6.49971e-06	2.86578e-05	2.16933e-05	2.52697e-05	2.113e-05	1.9048e-05	1.53749e-05	2.11065e-05	2.20703e-05	1.06532e-05	1.19335e-09	5.28541e-06	1.91867e-05	1.02395e-05	1.69409e-05	1.94599e-05	1.56304e-05	1.91829e-05	1.18001e-05	4.43997e-06	3.10433e-05	1.83403e-05	1.9377e-05	1.6279e-05	2.28005e-05	1.47012e-05	1.77898e-05
139	PC(18:4e/18:5)	0.976551	758.532	279.786	2.72077e-05	2.86141e-05	3.81234e-06	2.38116e-05	2.23267e-05	2.16015e-05	7.32251e-06	2.54741e-05	1.05476e-05	1.23601e-06	1.96911e-05	8.97131e-06	2.51522e-05	1.11257e-05	1.92746e-05	2.22233e-05	1.30807e-05	1.57359e-05	4.56312e-06	1.88672e-05	1.6532e-05	1.73417e-05	2.08984e-05	1.40789e-05	1.86194e-05	2.26172e-05	1.93988e-05	7.496e-06	3.31777e-05	4.38528e-06	9.73759e-06	9.13717e-06	1.67822e-05	1.2043e-05	1.9426e-05	1.67723e-05	8.63157e-06	2.3244e-06	1.59369e-05	1.37655e-05	2.04629e-05	1.51516e-05	1.68113e-05	1.56708e-05	1.66011e-05
41	PC(18:4e/2:0)	0.999312	544.339	75.4294	8.28599e-05	0.000110617	7.24791e-05	8.7348e-05	9.05111e-05	0.000119262	0.000113568	0.000179614	0.000197003	0.000101697	0.000215239	9.72064e-05	0.000130577	0.000139777	0.000145922	0.000169987	0.000112017	0.000122629	9.31817e-05	0.00017312	0.000127731	0.000113355	9.95628e-05	0.000130506	5.36319e-05	0.000139989	8.22253e-05	0.000178757	0.000149722	0.000123819	0.000185074	0.000132229	0.000157782	0.000145171	0.000185677	9.87897e-05	0.000216275	8.70436e-05	0.000169956	6.62594e-05	9.13625e-05	0.000130359	0.000127278	0.000119789	0.000132908
285	PC(18:4e/20:5)	0.942691	786.528	354.848	3.04893e-05	0.000106958	6.0747e-05	0.000114337	0.000145673	6.16933e-05	0.000145709	7.71046e-05	0.000118636	9.58825e-05	0.000132155	4.92974e-05	0.000107546	0.00020162	8.82438e-05	0.000152049	8.47309e-05	0.000109363	0.00014073	0.000160197	0.000109158	0.000242343	0.000150948	0.000181938	0.000175988	0.000130732	0.000126934	0.000171685	0.000118719	6.42174e-05	0.000121128	0.000169731	9.04831e-05	9.90353e-05	0.000118215	9.18001e-05	0.000209666	1.27249e-09	0.000107118	0.000102741	0.000152932	0.000131318	0.000154536	0.000150961	0.000117859
38	PC(18:4e/22:6)	0.999499	812.54	184.607	5.67591e-05	2.73831e-05	5.85876e-06	1.28133e-09	4.28439e-05	9.69115e-06	5.7742e-06	1.88745e-05	6.13281e-06	4.25499e-06	2.0381e-05	8.09836e-06	1.38895e-05	1.06735e-05	1.15635e-05	1.64854e-05	9.36388e-06	2.36664e-05	5.88771e-06	1.74135e-05	1.57498e-05	2.12341e-05	1.76886e-05	7.26326e-06	9.09287e-06	3.95191e-05	1.64661e-05	7.62232e-06	1.19335e-09	3.80674e-06	2.00496e-05	2.52269e-06	5.38608e-06	2.00749e-05	1.15661e-05	1.48602e-05	1.00445e-05	2.93961e-06	2.56447e-05	7.31174e-06	6.36221e-06	1.24728e-05	1.39949e-05	1.11171e-05	1.31019e-05
39	PC(18:5e/18:5)	0.999496	756.515	238.166	2.77191e-05	2.5879e-05	4.65327e-06	2.51943e-05	2.10214e-05	2.13278e-05	6.32953e-06	2.43573e-05	1.0483e-05	2.97847e-06	1.92501e-05	9.339e-06	1.69834e-05	1.39471e-05	1.6221e-05	2.47695e-05	1.20754e-05	1.71689e-05	5.24715e-06	1.91265e-05	1.62036e-05	1.62265e-05	2.2305e-05	1.67628e-05	1.33987e-05	2.63941e-05	1.55e-05	6.02763e-06	3.22302e-05	4.42939e-06	9.8277e-06	7.55034e-06	1.44361e-05	2.0648e-05	1.53467e-05	1.36338e-05	1.37174e-05	2.60782e-06	1.21317e-05	1.23564e-05	1.37182e-05	1.44624e-05	1.46696e-05	1.44782e-05	2.03802e-05
288	PC(18:5e/20:5)	0.942691	784.51	330.305	6.22776e-05	9.1162e-05	6.19634e-05	0.000112538	8.2134e-05	0.00010774	0.000100886	0.000109006	0.000175318	0.000111972	7.46924e-05	6.55842e-05	5.54683e-05	9.73409e-05	9.56856e-05	8.38437e-05	6.70098e-05	9.27572e-05	8.74248e-05	0.000137822	9.36312e-05	0.000125844	0.000131214	0.000136878	7.00406e-05	8.01579e-05	7.98777e-05	0.000132103	0.000152951	0.000127927	0.000118322	0.000155078	7.57403e-05	0.000124939	7.44459e-05	6.3246e-05	0.000136614	0.000135224	6.43337e-05	6.84834e-05	8.32353e-05	0.000106833	0.000106045	9.4715e-05	9.90699e-05
284	PC(18:5e/22:6)	0.942691	810.501	365.452	7.53136e-06	1.24449e-05	1.86192e-05	5.49187e-06	8.85097e-06	1.53015e-05	1.51081e-05	2.12248e-05	1.89566e-05	2.49831e-05	1.79537e-05	9.35031e-06	1.11005e-05	1.98741e-05	1.22366e-05	1.12556e-05	1.03487e-05	5.67496e-06	1.3706e-05	2.34311e-05	1.41722e-05	7.25336e-06	1.86418e-05	2.05919e-05	1.02988e-05	6.55517e-06	9.87969e-06	1.47552e-05	1.85206e-05	8.19932e-06	1.92263e-05	1.57178e-05	1.28539e-05	3.1553e-05	2.52631e-05	1.36647e-05	2.3517e-05	2.25964e-05	1.69031e-05	5.47316e-06	1.0367e-05	1.55916e-05	1.43257e-05	1.51797e-05	1.46324e-05
40	PC(18:5e/24:4)	0.999452	842.588	329.378	3.82524e-05	2.61319e-05	3.85823e-06	3.00787e-05	2.48167e-05	1.20465e-05	8.66008e-06	2.23095e-05	9.91949e-06	3.34625e-06	1.91715e-05	8.19676e-06	1.57209e-05	9.82891e-06	6.53858e-06	1.90183e-05	1.8608e-05	1.54713e-05	4.39617e-06	1.10335e-05	1.53702e-05	2.33695e-05	2.29665e-05	1.65344e-05	1.27842e-05	2.49499e-05	1.79085e-05	7.04585e-06	2.55738e-05	9.72479e-06	7.41834e-06	1.11821e-05	2.32288e-05	1.26314e-05	1.64834e-05	2.20986e-05	1.02387e-05	3.60624e-06	1.66204e-05	7.10962e-06	1.05979e-05	1.51037e-05	1.47054e-05	2.20605e-05	1.98333e-05
334	PC(19:1/19:1)	0.918322	814.62	490.435	4.57478e-09	0.000352754	0.000161856	0.000331225	0.000295503	0.000182881	0.000347723	0.000220049	0.000405417	0.000391024	0.000311826	0.000219824	0.000365532	1.13128e-09	0.000244526	0.000249617	0.000345565	0.000336217	0.000351626	0.000287561	0.000270037	0.000516848	0.000235684	0.000262303	0.000393121	0.000382036	0.000326749	0.00042272	0.000396943	0.000349067	0.000267512	0.000268833	0.00036859	0.000302273	0.000426881	0.00038672	0.000462212	0.000479994	0.00049271	0.000323373	0.000321257	0.000369291	0.000329057	0.00033549	0.000333634
176	PC(19:2/19:2)	0.964539	810.588	418.572	4.57478e-09	0.00124639	0.0014291	0.00100421	0.0011902	0.00121116	0.00124443	0.00125586	1.18992e-09	0.000975776	0.00105327	0.00129928	0.00127864	0.00103755	0.00111114	0.00105372	0.00103298	0.00103268	0.00117443	0.00113554	0.00103832	0.000981348	0.00135809	0.00146636	0.00104175	0.00127003	0.00113559	0.00140038	0.00101687	0.0012251	0.00138486	0.00137851	0.00138115	0.00145289	0.00119942	0.000989344	0.00115788	0.000950756	0.00101184	0.00111231	0.0011517	0.00120331	0.00112931	0.00103096	0.0010965
124	PC(2:0/19:0)	0.979826	580.396	115.906	9.25294e-06	7.33241e-06	3.08983e-06	5.4139e-06	1.16833e-05	5.464e-06	4.81466e-06	3.02082e-06	4.25882e-06	2.30764e-06	7.52479e-06	2.57789e-06	4.50512e-06	4.18484e-06	4.30075e-06	4.47399e-06	4.21154e-06	5.74276e-06	2.79422e-06	5.69199e-06	5.13231e-06	3.70046e-06	8.96035e-06	1.22256e-09	6.21483e-06	1.09312e-05	7.57933e-06	5.51568e-06	9.83963e-06	3.59751e-06	7.76848e-06	4.45006e-06	6.12729e-06	8.75149e-06	4.98035e-06	4.9925e-06	8.58801e-06	3.41531e-06	9.53072e-06	3.09538e-06	7.05489e-06	6.25473e-06	6.35968e-06	6.22292e-06	6.495e-06
328	PC(2:0/27:0)	0.920908	692.52	380.279	1.81987e-05	1.33755e-09	4.6597e-06	1.37284e-05	7.82824e-06	1.36974e-05	1.19624e-05	1.89173e-05	8.71615e-06	3.73847e-06	8.85143e-06	1.49335e-05	2.39211e-05	1.17076e-05	1.89528e-05	1.27075e-09	1.28181e-05	9.04757e-06	1.21971e-05	8.58686e-06	1.11233e-05	1.30829e-09	1.05393e-05	1.23648e-05	1.74673e-05	1.28533e-09	1.7218e-05	7.69942e-06	1.33749e-05	1.60159e-05	9.83811e-06	1.70141e-05	1.74266e-05	1.2413e-05	8.88043e-06	1.56851e-05	2.17694e-05	1.25974e-05	1.13999e-05	2.4721e-05	1.01742e-05	1.28301e-05	1.75391e-05	1.6608e-05	1.64438e-05
180	PC(20:1/20:4)	0.96396	880.607	469.334	0.000109531	5.64241e-05	1.46536e-09	5.30704e-05	4.9824e-05	4.60638e-05	5.00558e-05	5.2239e-05	1.18992e-09	5.93575e-05	4.29761e-05	9.54063e-05	4.70084e-05	4.57602e-05	4.03243e-05	4.17357e-05	4.58234e-05	4.47252e-05	4.61584e-05	4.22689e-05	4.84378e-05	4.76071e-05	5.09113e-05	4.71611e-05	3.70962e-05	6.13951e-05	5.24616e-05	1.21998e-09	4.16624e-05	6.89794e-05	4.50803e-05	6.82886e-05	9.79826e-05	1.21068e-09	6.29559e-05	4.19051e-05	4.58228e-05	4.1505e-05	4.37186e-05	7.38666e-05	4.426e-05	4.86331e-05	4.35343e-05	6.68373e-05	6.26434e-05
165	PC(20:2/20:2)	0.968915	838.622	468.449	7.61412e-05	8.14551e-05	7.65422e-05	4.08381e-05	3.66882e-05	7.57236e-05	3.98138e-05	5.08034e-05	6.36632e-05	4.5685e-05	4.36441e-05	8.65394e-05	3.84704e-05	4.95674e-05	6.61316e-05	3.86709e-05	3.89068e-05	4.07216e-05	4.44959e-05	4.08034e-05	5.37653e-05	4.85426e-05	3.77088e-05	5.75819e-05	3.28855e-05	5.88622e-05	4.43955e-05	4.84793e-05	4.23995e-05	5.16956e-05	4.06868e-05	5.22144e-05	4.83156e-05	1.21068e-09	1.29905e-09	8.19767e-05	4.45434e-05	4.968e-05	4.74219e-05	4.57324e-05	4.72244e-05	4.40174e-05	5.04257e-05	4.64302e-05	4.3242e-05
159	PC(20:2/20:4)	0.970739	878.591	429.188	4.57478e-09	4.03486e-05	4.851e-05	4.00385e-05	3.70805e-05	4.82801e-05	4.42806e-05	4.16578e-05	5.44463e-05	5.3531e-05	4.62182e-05	5.12539e-05	4.39969e-05	5.03629e-05	4.25727e-05	3.76844e-05	3.73625e-05	3.74373e-05	4.09019e-05	4.51008e-05	4.20535e-05	4.10532e-05	4.05823e-05	4.69851e-05	3.14672e-05	1.28533e-09	3.75659e-05	5.12025e-05	4.22542e-05	4.44671e-05	4.09323e-05	6.00886e-05	1.47183e-09	1.21068e-09	1.29905e-09	4.89356e-05	5.9165e-05	4.54258e-05	4.07774e-05	5.66227e-05	4.85256e-05	3.68028e-05	3.94483e-05	4.47103e-05	4.31579e-05
323	PC(20:3/18:5)	0.925445	802.537	384.435	1.93794e-05	1.33755e-09	7.77176e-06	4.42912e-06	5.88344e-06	1.10795e-05	2.06622e-05	3.53863e-06	2.33036e-05	7.97765e-06	2.35877e-05	1.64884e-05	8.57042e-06	1.38991e-05	8.79176e-06	1.4114e-05	1.013e-05	1.17976e-05	9.34841e-06	1.15774e-05	1.16166e-05	1.95933e-05	8.01036e-06	1.4596e-05	1.04758e-05	3.52478e-06	2.51219e-05	1.80018e-05	3.37044e-06	2.29336e-05	2.16387e-05	3.75616e-05	9.12442e-06	1.17422e-05	2.21438e-05	3.30772e-05	1.47259e-05	2.39879e-05	3.55239e-05	6.12439e-06	3.3309e-05	1.87294e-05	1.10361e-05	6.85469e-06	1.13169e-05
147	PC(20:3/20:3)	0.975135	834.601	428.393	4.57478e-09	1.33755e-09	0.000713263	0.000609437	0.000352928	0.000468503	0.0004385	0.000414062	0.000480194	0.000420975	0.000440848	0.00056889	0.00033577	0.000462052	0.000400203	0.000498888	0.000353933	0.000350508	0.000679899	0.000425772	0.000420732	0.000389706	0.000642731	0.000479103	0.00031389	0.000473275	0.000476886	1.21998e-09	0.000446187	0.000428322	0.000631384	0.000471866	0.000561755	1.21068e-09	0.000625052	0.000327556	0.000471108	0.000412734	0.000377219	0.000407396	0.000389393	0.000416278	0.000773228	0.000403775	0.000401191
758	PC(20:3/22:5)	0.711666	902.514	459.005	4.57478e-09	2.61382e-05	2.65273e-05	1.89112e-05	3.49558e-05	2.8285e-05	2.27928e-05	2.00757e-05	2.12566e-05	2.46751e-05	1.76193e-05	2.93728e-05	2.30186e-05	1.38312e-05	2.61848e-05	1.77116e-05	2.56427e-05	3.0746e-05	2.39864e-05	1.65498e-05	2.24143e-05	1.69893e-05	2.93719e-05	1.64093e-05	2.52353e-05	2.06203e-05	3.0862e-05	1.7911e-05	1.73552e-05	2.57587e-05	1.51443e-05	2.38072e-05	3.06576e-05	1.58931e-05	1.94349e-05	2.37706e-05	1.70689e-05	1.8448e-05	1.78405e-05	4.07234e-05	2.21113e-05	2.22706e-05	1.45541e-05	1.66492e-05	1.59813e-05
599	PC(20:3/22:6)	0.840635	900.575	376.921	6.9156e-06	2.79837e-05	1.20653e-05	1.31715e-05	1.3022e-05	1.08292e-05	2.02434e-05	3.85838e-05	4.49401e-05	1.93901e-05	2.49062e-05	2.68444e-05	2.81976e-05	3.33133e-05	1.99443e-05	1.13691e-05	1.42518e-05	3.0933e-06	1.20545e-05	1.83638e-05	1.99741e-05	1.5938e-05	1.91387e-05	2.45131e-05	2.11854e-05	1.9248e-05	1.61509e-05	2.84449e-05	1.48232e-05	9.52166e-06	1.82683e-05	2.81661e-05	4.13004e-05	3.92623e-05	1.29905e-09	2.52689e-05	2.52651e-05	3.55934e-05	2.93088e-05	5.83898e-06	2.18221e-05	2.1953e-05	2.06781e-05	3.50692e-05	2.07666e-05
279	PC(20:3e/18:5)	0.942691	788.541	408.822	0.000209772	9.38601e-05	5.03615e-05	0.000126239	3.34807e-05	0.00012757	4.04386e-05	0.00010174	7.66494e-05	0.000106657	0.000103026	0.000109926	1.42029e-09	8.50001e-05	0.000110573	0.000129599	9.22727e-05	0.000116309	9.97004e-05	8.75528e-05	9.50364e-05	0.000129703	1.40393e-09	0.00013741	8.39231e-05	0.00010063	0.000136545	7.55203e-05	0.000107852	0.000108407	0.000110384	0.000105897	8.73582e-05	8.76815e-05	8.63764e-05	1.33743e-09	9.36121e-05	4.15224e-05	9.45135e-05	0.000149344	3.79275e-05	8.87304e-05	3.59272e-05	0.000107795	8.48866e-05
87	PC(20:4/20:4)	0.98966	830.551	133.366	1.57314e-05	2.33142e-05	1.02391e-06	6.18088e-06	1.67794e-05	3.68249e-06	4.53652e-06	7.78774e-06	2.80335e-06	1.65333e-06	1.80298e-05	2.96485e-06	1.7488e-05	6.45271e-06	5.59173e-06	6.38048e-06	1.20264e-05	1.62389e-05	3.81226e-06	6.83582e-06	8.96571e-06	4.20057e-06	7.62321e-06	1.19814e-05	3.49137e-06	2.17753e-05	5.75906e-06	3.15715e-06	1.19335e-09	1.22179e-06	2.8579e-06	1.71141e-06	1.02535e-05	5.7042e-06	1.26947e-05	3.08171e-06	2.80733e-06	7.454e-07	3.48193e-06	4.6749e-06	1.21405e-05	5.96822e-06	3.73891e-06	1.13382e-05	4.62651e-06
137	PC(20:4/20:5)	0.977664	828.537	132.301	2.01295e-05	2.18077e-05	1.07465e-06	1.92527e-05	1.76843e-05	8.36722e-06	1.47203e-06	1.87358e-05	1.03472e-05	8.63564e-07	8.78089e-06	3.43902e-06	1.78682e-05	3.00843e-06	5.83626e-06	1.59631e-05	1.16344e-05	4.80736e-06	3.45136e-06	7.21452e-06	1.00869e-05	1.23747e-05	2.06356e-05	1.76327e-05	1.11147e-05	1.28533e-09	1.36907e-05	4.34667e-06	1.19335e-09	3.12042e-06	9.05753e-06	5.26905e-06	8.61364e-06	4.32627e-06	1.12704e-05	2.61297e-06	3.97575e-06	2.06899e-06	4.73593e-06	9.87238e-06	3.87833e-06	7.42996e-06	4.82837e-06	1.10469e-05	5.10365e-06
221	PC(20:4/22:4)	0.95469	902.582	377.193	4.5818e-07	4.46452e-06	8.77198e-07	3.32141e-07	2.23057e-06	1.06728e-06	3.37191e-06	6.89913e-06	4.59212e-06	2.69802e-06	4.19003e-06	3.28549e-06	4.09402e-06	5.17335e-06	3.22973e-07	1.33446e-06	2.80608e-06	3.30618e-06	2.78051e-06	2.50989e-06	2.8397e-06	2.72617e-06	2.58955e-06	4.87535e-06	3.70424e-06	2.11305e-06	3.14632e-06	4.70772e-06	2.19612e-06	1.59777e-06	1.03519e-06	4.68495e-06	4.02757e-06	6.08328e-06	1.29905e-09	4.54333e-06	4.25164e-06	5.95932e-06	4.73609e-06	7.40167e-07	4.11504e-06	3.39171e-06	1.75488e-07	5.26799e-06	2.74882e-06
590	PC(20:4/22:5)	0.847945	900.575	389.644	2.00568e-06	1.13894e-05	1.05607e-05	7.69614e-06	8.46894e-06	1.23317e-05	1.90075e-05	1.39098e-05	1.71669e-05	1.62501e-05	4.84946e-07	5.17817e-07	1.93617e-05	1.2652e-05	1.76658e-05	6.3042e-06	1.53524e-05	2.33686e-05	8.70388e-06	1.95522e-05	1.21375e-05	8.92832e-06	1.1796e-05	2.40469e-07	8.85494e-06	8.27793e-06	1.10251e-05	1.63804e-05	1.05872e-05	1.53223e-05	2.20894e-05	9.05202e-06	6.37098e-07	1.79194e-05	2.49509e-05	1.07548e-05	4.97278e-07	1.89474e-05	1.15475e-05	6.53691e-06	6.7893e-06	1.10567e-05	1.26375e-05	1.31697e-05	1.37137e-05
200	PC(20:4/22:6)	0.95953	854.567	351.592	0.000277643	0.00126573	0.000945741	0.000358766	0.000711986	0.000830309	0.00107256	0.000733148	0.00256753	0.00179342	0.00168907	0.000965079	0.000709493	0.00167194	0.000962095	0.000711756	0.000861462	0.000895245	0.00088944	0.00167682	0.00107946	0.00125901	0.00128	0.00229465	0.000920742	0.00104051	0.00118796	0.00184007	0.00118846	0.00112439	0.00189707	0.0018125	0.00103451	1.21068e-09	0.00197755	0.00129185	0.00233569	0.00253567	0.00123526	0.000442811	0.000992712	0.00138457	0.00133558	0.00137634	0.00140617
281	PC(20:4e/18:5)	0.942691	786.501	378.702	2.29119e-05	1.35891e-05	2.39239e-05	2.27269e-05	1.84667e-05	2.92523e-05	2.53986e-05	2.41217e-05	2.28165e-05	2.81684e-05	1.76048e-05	1.12687e-05	1.51351e-05	2.40393e-05	1.69416e-05	2.56116e-05	1.75861e-05	1.07988e-05	2.62603e-05	2.6864e-05	2.11743e-05	1.45336e-05	2.51956e-05	2.13114e-05	1.58527e-05	1.45033e-05	1.93476e-05	2.04774e-05	2.39059e-05	2.19004e-05	1.93255e-05	2.43646e-05	2.32435e-05	2.50053e-05	1.96771e-05	1.73292e-05	3.34755e-05	3.30405e-05	1.56558e-05	9.75096e-06	1.59288e-05	2.06912e-05	1.97694e-05	1.99767e-05	1.91309e-05
42	PC(20:4e/22:6)	0.999289	840.573	256.957	2.07227e-05	1.33755e-09	2.85053e-06	1.28133e-09	1.18377e-05	1.01604e-05	3.90135e-06	1.47767e-05	6.07808e-06	1.42986e-06	9.81476e-06	4.58131e-06	9.62404e-06	5.42928e-06	1.18138e-05	1.13712e-05	8.79115e-06	7.54653e-06	2.53284e-06	7.76163e-06	7.55133e-06	9.96316e-06	1.07454e-05	6.62609e-06	6.38692e-06	1.57123e-05	7.38597e-06	3.91704e-06	1.14586e-05	3.17372e-06	5.38208e-06	3.89004e-06	1.08248e-05	6.14792e-06	1.15842e-05	8.24218e-06	6.27417e-06	1.84346e-06	8.91062e-06	5.98483e-06	7.04513e-06	7.57493e-06	8.28851e-06	7.57096e-06	9.18373e-06
602	PC(20:5/22:6)	0.8394	852.536	339.764	1.5175e-06	3.08366e-07	1.66547e-06	1.9756e-06	1.56445e-06	2.04164e-06	1.87795e-06	3.67959e-07	1.71634e-06	1.28763e-06	7.50062e-07	1.37115e-07	1.50497e-06	1.87884e-06	2.32172e-07	3.08101e-06	3.55537e-07	9.50363e-07	7.3582e-07	2.70612e-06	1.33274e-06	6.06192e-07	5.92209e-08	5.60763e-07	1.33315e-07	7.3519e-08	3.93208e-07	1.21998e-09	1.41467e-06	1.86923e-07	1.39987e-07	2.90292e-07	1.68442e-07	1.23533e-07	8.21057e-08	9.96654e-07	6.84998e-07	3.80647e-07	1.47351e-07	1.86229e-06	5.70545e-07	4.43794e-07	7.47894e-07	6.25148e-07	8.52505e-07
68	PC(20:5e/18:5)	0.994268	784.546	349.322	1.61113e-05	2.33847e-05	1.31342e-05	1.28133e-09	1.54817e-05	1.11657e-05	9.46578e-06	2.00888e-05	5.76197e-06	9.53776e-06	1.97786e-05	1.02367e-05	1.43567e-05	4.31405e-06	1.19447e-05	1.68322e-05	6.74893e-06	5.4075e-06	9.6224e-06	1.32736e-05	1.18324e-05	1.45375e-05	1.07748e-05	9.73287e-06	4.82672e-06	2.13684e-05	1.58469e-05	1.03325e-05	1.19335e-09	1.07094e-05	1.13504e-05	1.11718e-05	8.05267e-06	6.90844e-06	1.07609e-05	1.22277e-05	4.2881e-06	8.42069e-06	1.14872e-05	9.33292e-06	7.26444e-06	9.96978e-06	8.52409e-06	7.28682e-06	1.04503e-05
908	PC(20:5e/2:0)	0.457014	614.357	386.234	4.13258e-05	1.32208e-05	2.55623e-05	1.96328e-05	1.47131e-09	2.19661e-05	2.3431e-05	2.06462e-05	2.38801e-05	2.09599e-05	1.89998e-05	1.73168e-05	1.55324e-05	1.79532e-05	1.84098e-05	1.7685e-05	1.66998e-05	1.50377e-09	1.77387e-05	1.17511e-09	1.75482e-05	1.88775e-05	2.20399e-05	1.98612e-05	1.43359e-09	1.93898e-05	2.34427e-05	1.71798e-05	2.09877e-05	1.56436e-05	2.15463e-05	1.90869e-05	1.78059e-05	1.21068e-09	2.03947e-05	2.30374e-05	1.72402e-05	1.90723e-05	1.96266e-05	1.81728e-09	2.34881e-05	1.69363e-05	1.79498e-05	3.70545e-05	1.90791e-05
90	PC(20:5e/22:6)	0.988536	838.556	239.744	2.06864e-05	1.89688e-05	2.59698e-06	2.01585e-05	1.05004e-05	1.31676e-05	3.64707e-06	2.13739e-05	9.06172e-06	1.53119e-06	1.00066e-05	8.95951e-06	8.21047e-06	5.96141e-06	1.06861e-05	1.93422e-05	1.48421e-05	7.90458e-06	5.14389e-06	1.15474e-05	1.12148e-05	8.72793e-06	1.69832e-05	1.41829e-05	5.63103e-06	1.17113e-05	1.21606e-05	3.46115e-06	1.40575e-05	2.63494e-06	5.21698e-06	1.00954e-05	1.49844e-05	6.98015e-06	1.56145e-05	8.34056e-06	6.7311e-06	2.96284e-06	7.35841e-06	2.83626e-06	6.36789e-06	8.85195e-06	1.16411e-05	7.33912e-06	7.93183e-06
270	PC(22:0/18:5)	0.945765	836.615	486.13	4.57478e-09	0.000144303	0.000191627	0.000177954	0.000134785	0.000135317	0.000193546	0.000155266	0.000163809	0.000158859	0.000186269	0.000137554	0.000219818	0.00022052	0.00015638	0.000139297	0.000219483	0.000214062	0.000182451	0.00016884	0.000165007	0.000200018	0.000123903	0.000155033	0.000154089	0.000183799	0.000164156	0.000182586	0.000169429	0.000215672	0.000185241	0.000128577	0.000195901	0.00018646	0.0002206	0.00018265	0.000212359	0.000194285	0.000199202	0.000189614	0.000129545	0.000178656	0.000140353	0.000175201	0.000171638
909	PC(22:4/18:5)	0.447491	828.551	402.224	4.57478e-09	0.000133481	0.000195819	1.28133e-09	0.000153527	0.000168873	0.000144839	0.000168797	0.000164595	0.000192015	0.000172273	1.49885e-09	0.000196763	0.000135345	0.000192193	0.000164704	0.000223039	0.000210478	0.000172308	0.00013725	0.000146315	0.000148706	0.000179518	0.000191192	0.000151495	0.000147718	0.000174825	0.000137318	0.000160789	0.000159318	0.000186906	0.000166979	0.000180858	0.000213601	0.000147003	0.000192201	0.000138887	0.000186496	0.000184336	0.000284753	0.000210213	0.000177156	0.000160913	0.000152557	0.000151482
118	PC(22:4/22:4)	0.981282	886.63	449.438	4.57478e-09	5.4099e-05	5.64666e-05	5.30233e-05	3.93223e-05	5.01306e-05	6.63015e-05	6.24651e-05	4.88037e-05	3.68675e-05	6.76974e-05	4.58259e-05	4.75686e-05	4.67176e-05	6.17984e-05	4.88458e-05	5.37222e-05	5.61706e-05	6.81428e-05	5.65222e-05	5.10248e-05	4.80088e-05	3.91031e-05	5.26382e-05	3.37933e-05	7.98645e-05	3.0662e-05	6.4454e-05	5.04108e-05	5.46555e-05	7.22573e-05	5.93362e-05	7.35249e-05	1.21068e-09	5.52703e-05	3.5837e-05	1.18155e-09	6.15531e-05	6.18125e-05	7.59041e-05	4.1366e-05	4.95227e-05	5.51716e-05	5.44347e-05	5.44486e-05
280	PC(22:4e/18:5)	0.942691	814.559	401.581	0.000416978	0.000554404	0.00052507	0.000583037	0.000749327	0.000385926	0.000712547	0.000219845	0.000986777	0.000347851	0.000358725	0.000723924	0.000118685	1.13128e-09	0.000485488	0.000720021	0.000515854	0.000891895	0.00089852	0.000897053	0.000554597	0.00111315	0.000575374	0.000833498	0.000989984	0.000998814	0.000657893	0.00121585	0.000641881	0.000909978	0.00104978	0.000922993	0.000722143	0.000565622	0.000877845	0.000717886	0.000896179	0.000942975	0.000577726	0.000641825	0.000993888	0.000842264	0.00103186	0.00100218	0.000693769
181	PC(22:5/22:5)	0.963539	882.6	389.344	4.33644e-05	4.45592e-05	4.47729e-05	1.77778e-05	2.94037e-05	2.9732e-05	4.53089e-05	4.73114e-05	6.35713e-05	3.7176e-05	4.51338e-05	5.5105e-05	4.64212e-05	4.3976e-05	5.56239e-05	2.83067e-05	3.76326e-05	6.09014e-05	3.18065e-05	3.84071e-05	4.23146e-05	3.73843e-05	3.66527e-05	5.16172e-05	3.10203e-05	4.50494e-05	2.96175e-05	5.18335e-05	3.7723e-05	4.21192e-05	5.20257e-05	5.42428e-05	6.10256e-05	7.30265e-05	7.831e-05	4.22169e-05	3.99005e-05	4.60433e-05	5.32763e-05	4.03865e-05	3.26731e-05	4.68072e-05	4.211e-05	4.1486e-05	4.39728e-05
189	PC(22:5/22:6)	0.962212	880.569	389.332	4.02347e-06	4.55326e-06	5.59632e-06	2.76795e-06	4.28672e-06	4.2815e-06	7.22787e-06	8.74301e-06	8.08238e-06	4.0848e-06	7.25962e-06	3.51095e-06	9.12422e-06	2.75538e-06	8.00992e-06	9.54369e-07	1.03912e-05	1.25345e-05	3.35812e-06	8.26884e-06	5.99072e-06	2.64205e-07	3.92806e-06	1.97588e-06	2.38101e-06	3.30476e-06	3.29218e-06	4.16749e-06	3.66294e-06	5.81022e-06	9.90656e-06	2.48578e-06	6.88797e-06	8.31664e-06	1.13087e-05	2.35638e-06	3.2981e-06	2.64387e-06	2.30192e-06	4.65313e-06	1.38817e-06	4.2167e-06	3.84251e-06	3.31192e-06	5.42496e-06
282	PC(22:5e/18:5)	0.942691	812.542	375.978	0.00141786	0.000885616	0.00114069	0.00129726	0.000889815	0.00136118	0.00111183	0.000898398	0.00143184	0.0011583	0.00108384	0.000589774	0.000642744	0.00116878	0.000907615	0.000849376	0.00118416	0.000926978	0.00119267	0.000994421	0.00105666	0.00137256	0.000968237	0.00145377	0.000952841	0.00113418	0.000816262	0.000985783	0.0012953	0.0013657	0.00107311	0.00118044	0.00108277	0.00113656	0.00082044	0.00068017	1.18155e-09	0.000698644	0.000839342	0.000583673	0.000927576	0.000968368	0.00115996	0.00113603	0.00110688
207	PC(22:6/22:6)	0.958076	878.566	373.996	8.12424e-07	4.13076e-05	1.94697e-05	9.52244e-07	2.01014e-05	1.31357e-05	3.1874e-05	3.33302e-05	3.53171e-05	2.52691e-05	3.90198e-05	2.47863e-05	3.5539e-05	4.044e-05	3.22973e-05	5.77576e-07	2.62452e-05	6.70126e-07	1.82717e-05	7.23555e-07	2.2007e-05	2.70143e-05	2.79922e-05	3.7174e-05	2.87205e-05	2.62231e-05	2.1501e-05	3.71735e-05	2.3907e-05	2.17892e-05	3.54926e-05	2.69684e-05	2.95464e-05	4.37104e-05	1.29905e-09	3.45912e-05	2.7977e-05	4.20479e-05	4.47878e-05	1.37455e-05	3.412e-05	2.92242e-05	2.99693e-05	2.92144e-05	2.88819e-05
286	PC(22:6e/17:2)	0.942691	802.585	349.107	4.92297e-06	8.14298e-06	2.79821e-07	7.87713e-06	5.73913e-06	3.87923e-06	1.30837e-09	4.43937e-06	1.76975e-06	1.41438e-07	9.70765e-06	7.31557e-06	5.23869e-06	4.98142e-06	1.0936e-06	1.27075e-09	4.25227e-06	3.58202e-06	3.35528e-07	5.87213e-06	3.97866e-06	8.02745e-06	1.40393e-09	4.93096e-06	4.68961e-06	6.28709e-06	7.78941e-06	1.78001e-07	8.46571e-06	1.34107e-09	2.38756e-06	2.69486e-06	1.66051e-05	3.9988e-06	3.66221e-06	1.33743e-09	3.31765e-06	1.27249e-09	5.2188e-06	3.40265e-06	1.32969e-09	4.08313e-06	2.33895e-06	4.04906e-06	4.25338e-06
138	PC(24:0/18:5)	0.976755	864.647	514.287	5.57381e-05	4.3385e-05	6.3e-05	3.65653e-05	3.11639e-05	3.70358e-05	2.98183e-05	6.23011e-05	5.61212e-05	4.1784e-05	3.45793e-05	7.21561e-05	4.06595e-05	3.92713e-05	3.22941e-05	3.8521e-05	4.31951e-05	4.01298e-05	4.27619e-05	4.37013e-05	4.42091e-05	5.8246e-05	3.00817e-05	5.19385e-05	4.20351e-05	4.48699e-05	2.88837e-05	4.16288e-05	3.01033e-05	4.52846e-05	3.81043e-05	4.63228e-05	2.84023e-05	1.21068e-09	5.79016e-05	4.43672e-05	4.89962e-05	2.55143e-05	5.23992e-05	3.74791e-05	4.74592e-05	4.0001e-05	4.53679e-05	4.70489e-05	4.10627e-05
123	PC(24:4/18:5)	0.980309	856.567	275.879	9.12204e-06	1.33755e-09	8.75596e-07	1.28133e-09	1.47131e-09	3.68086e-06	1.41553e-06	7.62465e-06	3.90129e-06	5.62138e-08	6.18143e-06	3.08922e-06	4.68581e-06	1.57277e-06	3.44696e-06	3.71772e-06	2.87923e-06	3.77824e-06	5.35561e-07	2.19533e-06	2.93813e-06	5.61391e-06	4.01598e-06	7.06193e-06	1.87646e-06	1.28533e-09	4.2153e-06	6.85611e-07	1.19335e-09	7.62186e-07	2.91914e-06	1.78052e-06	3.47472e-06	4.07111e-06	1.29905e-09	3.11879e-06	2.83492e-06	1.67884e-06	2.71633e-06	9.13993e-07	2.53802e-06	2.51408e-06	3.92192e-06	3.82297e-06	4.19172e-06
125	PC(3:0/18:4)	0.979805	572.297	50.8923	4.57478e-09	2.29258e-07	4.36081e-08	3.24928e-07	1.13299e-07	2.06681e-07	3.79777e-07	1.96391e-07	2.96361e-07	2.15324e-07	5.01743e-07	1.45834e-08	1.04613e-07	3.19571e-07	2.2927e-07	2.92609e-07	1.36588e-07	6.70114e-08	9.47825e-08	1.73159e-07	1.97207e-07	3.56641e-07	1.71464e-07	1.22256e-09	3.98271e-08	2.83626e-07	6.8075e-08	2.87107e-07	1.94614e-07	9.38743e-08	1.19971e-09	1.03208e-07	3.32746e-07	4.79823e-07	4.08328e-07	1.04116e-07	1.18155e-09	2.15173e-07	3.13632e-07	2.3365e-08	6.14537e-08	1.77034e-07	1.83161e-07	2.5745e-07	2.00074e-07
773	PC(3:0/22:1)	0.683537	634.452	80.7786	5.25736e-05	1.41361e-05	2.29198e-05	3.38355e-05	4.05033e-06	6.27298e-05	6.60918e-05	2.96241e-05	4.16358e-05	4.7521e-05	2.59656e-05	3.20604e-05	3.2718e-05	4.49057e-05	1.32527e-09	3.26799e-05	1.40295e-05	8.03122e-05	2.03542e-05	1.89585e-05	3.38552e-05	1.54798e-05	2.03941e-05	3.10411e-06	1.77268e-05	1.37853e-05	7.14935e-06	7.95526e-05	1.78981e-05	3.09309e-05	2.48232e-06	5.30614e-05	9.94125e-05	2.54883e-05	3.95069e-05	4.35014e-05	3.57961e-05	6.21364e-05	2.59742e-05	8.71039e-05	8.42468e-05	3.82366e-05	3.26525e-05	3.55619e-05	3.76125e-05
276	PC(4:0/27:0)	0.943563	720.546	454.993	4.57478e-09	0.000155796	8.20376e-05	0.000127768	0.000115567	0.00012464	0.00012901	0.000140693	0.000121311	9.89084e-05	7.9515e-05	0.00013353	0.000147205	0.000120898	9.01417e-05	0.000158354	0.000126712	0.000102567	0.000133974	0.000137748	0.000116319	0.00018789	0.000110792	7.0611e-05	0.000125201	0.00016729	0.000119988	0.000103474	7.57366e-05	0.00012559	7.80216e-05	0.000124611	0.000134362	0.000134152	0.000113942	0.000135829	0.000148943	0.000137873	0.000116836	0.000121252	9.60092e-05	0.00012142	7.76451e-05	7.66504e-05	0.000117445
301	PC(5:0/16:4)	0.937204	572.334	77.9681	4.5068e-05	1.44701e-05	1.8728e-05	1.38993e-05	1.75412e-05	1.72574e-05	1.59676e-05	1.81811e-05	1.73223e-05	1.49641e-05	1.97924e-05	1.91573e-05	2.02631e-05	1.518e-05	1.88312e-05	2.24214e-05	1.39601e-05	2.40032e-05	1.3447e-05	1.17511e-09	1.80228e-05	1.48695e-05	8.83543e-06	1.45886e-05	6.75998e-06	9.70019e-06	1.14677e-05	7.46699e-06	1.63497e-05	6.78769e-06	1.08012e-05	8.1408e-06	1.10121e-05	1.1502e-05	1.28718e-05	1.42121e-05	1.18899e-05	4.10154e-06	1.25906e-05	2.70254e-05	2.02183e-05	1.20596e-05	1.75123e-05	1.68948e-05	1.65201e-05
316	PC(5:0/26:1)	0.931563	718.536	389.44	0.000105464	1.33755e-09	2.90677e-05	3.95027e-05	2.88692e-05	2.9168e-05	3.11422e-05	3.59072e-05	1.18992e-09	1.51107e-05	2.83122e-05	4.15216e-05	5.21819e-05	3.86115e-05	4.33174e-05	5.84596e-05	3.39613e-05	2.89219e-05	3.0462e-05	2.96375e-05	3.49811e-05	1.30829e-09	2.76449e-05	3.98817e-05	4.2122e-05	1.28533e-09	4.49896e-05	3.28314e-05	3.97789e-05	3.5609e-05	3.17629e-05	4.84363e-05	3.59329e-05	3.71589e-05	2.28605e-05	3.48135e-05	3.54893e-05	3.41793e-05	2.36912e-05	5.94043e-05	3.43417e-05	3.30465e-05	3.76341e-05	3.56528e-05	4.1072e-05
228	PC(6:0/26:1)	0.953742	732.554	415.433	0.00621635	0.0033491	0.00217289	0.00325862	0.00209875	0.00180649	0.00216583	0.00246972	0.0024048	0.00136472	0.00235024	0.00277244	0.00164447	0.00244292	0.00295032	0.00326273	0.00248355	0.00246094	0.00245022	0.00248215	0.00263036	0.0029765	0.0019708	0.00231171	0.00292076	0.00337775	0.0024888	0.00217778	0.00234287	0.00221848	0.00299592	0.00249636	0.00198137	0.00255483	0.00213078	0.00247963	0.00240044	0.00236342	0.00207604	0.00366226	0.00281054	0.00253685	0.00260802	0.0023734	0.00229236
273	PC(6:0/26:2)	0.945021	730.537	393.143	0.000246821	0.00013412	7.96408e-05	0.000129764	8.84985e-05	0.000102003	8.25067e-05	0.000106992	9.26294e-05	6.15185e-05	0.000104573	9.47348e-05	0.000114989	0.000121657	9.08591e-05	1.27075e-09	0.000111095	0.000106105	8.63901e-05	0.000109525	0.000103221	1.30829e-09	9.77594e-05	9.05559e-05	0.00011744	0.000144352	0.000111254	9.74015e-05	9.59229e-05	0.000108841	9.36937e-05	0.000116632	0.000107403	9.4971e-05	8.39213e-05	0.000102243	0.000137429	0.000136232	8.40467e-05	0.000157137	8.73734e-05	0.000103231	9.53846e-05	9.1222e-05	0.000108679
223	PC(7:0/26:1)	0.954298	746.569	441.545	0.000339389	1.33755e-09	0.000186342	0.000223844	0.000196471	0.000190612	0.000140189	0.000222136	0.000273425	0.000131198	0.000220151	0.000249017	0.000223227	0.000205461	0.000183488	1.27075e-09	0.000188955	0.000146771	0.000209383	0.000169067	0.000184957	1.30829e-09	0.000184696	0.000284992	0.000183355	1.28533e-09	0.000225036	0.000158562	0.000153888	0.000225042	0.000189451	0.00023153	0.000207585	0.000220982	0.000202369	0.000200191	0.000223575	0.000177675	0.000203433	0.000189867	0.000212017	0.000183712	0.000242022	0.000233396	0.000221769
233	PC(7:0/26:2)	0.95123	744.552	399.042	4.57478e-09	0.000242024	0.00011345	0.000184732	0.000203297	0.000196256	0.000166313	0.000156047	0.000137278	0.000166544	0.000134441	0.000161673	0.000172598	0.00014883	0.000178856	1.27075e-09	0.0001392	0.000124458	0.000175843	0.000134727	0.000146829	1.30829e-09	0.000149545	0.00016496	0.00016426	1.28533e-09	0.000216069	0.000124449	0.000163646	0.00019594	0.000122173	0.000171754	0.00017311	0.000136832	0.000132124	0.000202653	1.18155e-09	0.00021198	0.000161767	0.00021921	0.000158099	0.000143429	0.000169747	0.000154156	0.000177677
272	PC(8:0/26:1)	0.945615	760.583	463.76	0.0321389	0.0125458	0.0136212	0.0121492	0.011573	0.0110317	0.0107008	0.0125256	0.0109462	0.00994091	0.0124188	0.0133791	0.0136705	0.0107816	0.0138666	0.0137865	0.0137045	0.0126198	0.0127558	0.0121484	0.0133152	0.0131412	0.0107305	0.0122599	0.0120527	0.0132662	0.0111074	0.00989762	0.0102249	0.0121864	0.0127325	0.0100915	0.0100214	0.0121342	0.0103923	0.0112165	0.0120016	0.01179	0.0116681	0.0138963	0.0134106	0.0117111	0.011167	0.0113882	0.0111857
238	PC(8:0/26:2)	0.949843	758.568	481.763	0.000159941	6.65582e-05	7.52656e-05	9.78089e-05	0.000106911	8.3307e-05	7.1772e-05	5.96832e-05	1.18992e-09	1.24641e-09	9.78963e-05	6.38843e-05	7.38154e-05	7.57236e-05	8.84247e-05	0.000110789	7.3312e-05	9.25149e-05	1.32309e-09	1.17511e-09	6.98806e-05	9.27663e-05	8.17334e-05	5.84302e-05	7.10421e-05	7.17116e-05	1.46205e-09	1.21998e-09	1.19335e-09	7.25622e-05	7.0737e-05	7.76071e-05	0.000101569	7.14685e-05	6.96966e-05	6.81317e-05	0.000104694	1.27249e-09	8.38338e-05	9.84753e-05	6.28164e-05	6.2864e-05	7.28859e-05	6.68927e-05	7.32035e-05
216	PC(9:0/26:2)	0.955598	772.584	451.862	0.000431949	0.000428068	0.000331971	0.000416552	0.000606459	0.000519929	0.000315987	0.000328151	0.000347415	0.000489042	0.000373953	0.000297793	0.000293685	0.000395984	0.000390227	1.27075e-09	0.000283129	0.00024831	0.000428145	0.000304329	0.000361554	1.30829e-09	0.000344968	0.000432664	0.000340542	0.000495555	0.00057835	0.00025832	0.000374788	0.000373027	0.000317241	0.00036781	0.000350833	0.000283998	0.000342026	0.000420835	1.18155e-09	0.000503684	0.00046641	0.000375365	0.00036782	0.000349712	0.000415606	0.000365983	0.000413687
241	PC(9:0/26:4)	0.949199	768.552	387.849	0.000952797	0.000475848	0.000365512	0.000363774	0.000548708	0.000718674	0.000524706	0.000529972	1.18992e-09	0.00036841	0.000591811	0.000584941	0.00048341	0.00030015	0.000402636	0.000507278	0.000715902	0.00063109	0.000376466	0.000367902	0.000490499	0.000628909	0.00043366	0.00054562	0.000462074	0.000671448	0.000411003	0.000338116	0.00041622	0.000882614	0.000411447	1.26938e-09	0.000661631	1.21068e-09	0.000340526	0.000441785	0.000498869	0.000297871	0.000597985	0.000805509	0.000323072	0.000458418	0.000411735	0.000414665	0.000692066
107	PE(10:0/26:4)	0.982612	740.521	412.146	4.57478e-09	0.00229182	0.00279621	0.00233088	0.00275267	0.00320991	0.00338625	0.0027207	0.00245875	0.00246226	0.00197601	0.00252874	0.00237855	0.00234707	0.00268585	0.00247976	0.00267374	0.00242481	0.002792	0.0032059	0.00249509	0.00221542	0.00281952	0.00232783	0.00315233	0.00210347	0.00241834	0.00238041	0.0027474	0.00312936	0.00264556	0.00349078	0.00279625	0.00265616	0.00218581	0.00219221	0.002559	0.00307366	0.00217412	0.0029775	0.00262951	0.00263373	0.00239977	0.00234206	0.00239782
370	PE(11:0/26:4)	0.902591	754.536	435.922	0.000137839	0.000100828	0.000109883	9.08226e-05	0.000149576	0.000186228	0.000104894	0.000135885	0.000136803	0.000128048	9.39384e-05	0.000100764	9.39337e-05	7.75709e-05	0.000140806	0.000178384	0.000146318	8.33375e-05	0.000122714	0.000111941	0.000121526	0.000139169	0.000118321	0.000142083	9.31539e-05	0.00011959	0.000116716	6.38685e-05	9.38315e-05	0.000101405	0.000104975	0.000120677	0.000138125	0.000120341	9.67567e-05	7.88535e-05	0.000132134	8.95979e-05	8.46613e-05	8.13242e-05	8.84719e-05	0.000106203	0.000104401	9.73727e-05	0.000162464
75	PE(12:0/22:3)	0.991822	714.507	391.099	6.19191e-05	2.96374e-05	2.07578e-05	2.55266e-05	2.96323e-05	2.5509e-05	2.17622e-05	2.26371e-05	1.99672e-05	1.46518e-05	2.51177e-05	2.79886e-05	2.48529e-05	1.5671e-05	2.55139e-05	3.41753e-05	2.52531e-05	2.94895e-05	3.17974e-05	2.8252e-05	2.70056e-05	1.175e-05	2.05956e-05	1.57166e-05	3.75944e-05	1.75812e-05	1.25562e-05	2.44343e-05	2.30825e-05	1.95772e-05	1.69798e-05	1.99587e-05	2.30225e-05	1.81766e-05	1.9134e-05	1.85074e-05	1.9092e-05	1.14902e-05	2.7746e-05	3.33372e-05	1.60159e-05	2.03174e-05	1.547e-05	1.56079e-05	2.94886e-05
82	PE(14:0/22:5)	0.990799	738.505	367.029	3.24046e-05	6.75708e-05	3.45328e-05	0.000102731	3.18355e-05	4.55448e-05	4.39272e-05	4.74109e-05	6.49181e-05	3.60287e-05	8.78676e-05	3.4206e-05	5.71226e-05	5.53714e-05	4.20839e-05	8.14471e-05	3.98968e-05	3.59794e-05	6.66512e-05	6.94189e-05	5.38475e-05	5.20483e-05	3.74297e-05	3.79593e-05	6.59175e-05	4.51736e-05	4.21948e-05	6.11512e-05	6.44752e-05	5.13867e-05	5.52653e-05	7.96294e-05	3.68528e-05	8.43151e-05	3.98561e-05	4.64688e-05	6.21163e-05	5.93026e-05	4.4007e-05	3.67521e-05	4.48944e-05	5.23598e-05	5.27725e-05	5.29209e-05	4.85398e-05
827	PE(14:0e/19:0)	0.595487	692.551	446.335	3.88726e-06	2.18634e-05	6.52117e-06	2.28467e-05	1.82644e-05	2.06189e-05	2.99965e-05	1.54817e-05	1.74671e-05	1.78112e-05	2.39209e-05	2.69634e-05	1.55719e-05	4.23917e-05	3.77392e-05	4.05416e-05	2.22808e-05	2.4665e-05	2.41341e-05	2.46396e-05	2.28803e-05	1.30829e-09	2.03746e-05	1.22256e-09	2.2179e-05	1.88202e-05	1.46205e-09	2.61491e-05	4.28736e-05	1.99754e-05	2.7085e-05	2.11103e-05	2.2676e-05	1.8334e-05	2.12956e-05	5.10771e-05	1.18155e-09	5.01648e-05	6.32447e-05	1.57964e-05	3.39211e-05	2.37541e-05	3.13583e-05	3.00514e-05	3.23749e-05
811	PE(14:0e/21:1)	0.631389	718.573	466.417	0.000133704	9.50118e-05	0.00011026	3.21574e-05	0.000103122	5.5804e-05	5.04778e-05	5.93381e-05	0.000135921	1.24641e-09	8.49754e-05	0.000127759	9.23421e-05	9.33942e-05	0.000113806	6.06506e-05	6.1316e-05	0.000112501	4.34893e-05	6.47545e-05	8.15393e-05	0.000152468	0.000123637	1.22256e-09	5.91206e-05	9.94204e-05	7.1406e-05	6.42965e-05	4.97642e-05	7.0518e-05	2.35325e-05	9.03956e-05	9.1464e-05	6.29709e-05	0.000116393	9.2704e-05	4.96307e-05	5.12516e-05	1.27449e-09	8.28879e-05	0.000157639	7.54751e-05	7.52785e-05	8.74101e-05	8.9884e-05
109	PE(14:1/22:4)	0.982612	738.507	387.829	4.57478e-09	6.83029e-06	1.16907e-05	6.11629e-06	5.84856e-06	6.16591e-06	4.96991e-06	9.7235e-06	1.92941e-06	3.18686e-06	6.40116e-06	1.49885e-09	1.0342e-05	5.4307e-06	7.40852e-06	4.36699e-06	9.69797e-06	1.0127e-05	4.31316e-06	3.81176e-06	5.91834e-06	6.83035e-06	3.86302e-06	7.05099e-06	4.34886e-06	1.05189e-05	4.04699e-06	5.5779e-06	4.61795e-06	6.96026e-06	4.79332e-06	4.31548e-06	4.30647e-06	5.13649e-06	5.16886e-06	5.08525e-06	5.41516e-06	3.02115e-06	5.702e-06	1.81728e-09	5.7521e-06	5.12567e-06	5.89751e-06	5.70834e-06	5.22292e-06
810	PE(14:1e/23:0)	0.631424	746.624	481.686	4.57478e-09	2.08526e-05	2.11586e-05	3.08357e-05	2.40406e-05	2.76506e-05	2.15557e-05	1.6928e-05	1.18992e-09	2.11988e-05	1.77146e-05	2.44132e-05	1.42728e-05	2.80428e-05	1.61656e-05	1.57541e-05	2.08676e-05	1.68257e-05	2.11857e-05	1.86845e-05	1.89076e-05	1.30829e-09	2.57685e-05	2.33528e-05	2.52035e-05	2.76147e-05	2.54547e-05	1.8228e-05	2.5257e-05	2.86246e-05	1.74055e-05	2.37928e-05	2.74903e-05	2.11646e-05	1.99886e-05	2.35465e-05	1.18155e-09	3.32881e-05	2.36919e-05	2.58234e-05	1.43614e-05	2.1503e-05	2.41545e-05	2.51799e-05	2.43143e-05
397	PE(16:0/16:0)	0.893414	690.549	398.623	1.31105e-06	5.89573e-07	7.43849e-07	4.07735e-07	5.50896e-07	5.0743e-07	7.67431e-07	5.99263e-07	9.90537e-07	6.63058e-07	3.42399e-07	5.21359e-07	5.20432e-07	6.35814e-07	4.16119e-07	7.71339e-07	9.14728e-07	1.08581e-06	6.99296e-07	8.93093e-07	6.9656e-07	9.68337e-07	3.87265e-07	6.31686e-07	4.53068e-07	8.00453e-07	7.40198e-07	6.57643e-07	8.14466e-07	7.36638e-07	5.74104e-07	1.26938e-09	6.62204e-07	3.90211e-07	1.29905e-09	2.81353e-07	8.02777e-07	5.49786e-07	7.65023e-07	4.98451e-07	4.0266e-07	5.55944e-07	7.19562e-07	4.89277e-07	5.02685e-07
97	PE(16:0/16:1)	0.986731	690.506	408.991	6.30498e-05	5.14042e-05	2.66733e-05	4.07394e-05	3.00458e-05	3.55285e-05	4.63505e-05	3.43817e-05	3.08021e-05	1.69904e-05	2.56129e-05	3.03545e-05	5.58168e-05	4.16867e-05	6.2136e-05	6.43579e-05	5.41587e-05	3.57765e-05	3.20114e-05	3.90031e-05	4.0844e-05	4.30317e-05	2.62883e-05	1.97388e-05	5.68212e-05	5.00091e-05	4.0193e-05	4.48371e-05	3.32617e-05	3.12043e-05	3.38532e-05	4.23338e-05	3.03847e-05	5.17863e-05	3.13467e-05	3.49756e-05	5.37384e-05	4.08169e-05	3.16633e-05	4.98383e-05	6.52062e-05	4.05664e-05	3.42651e-05	3.41254e-05	3.55652e-05
54	PE(16:0/18:2)	0.996726	716.559	446.866	4.57478e-09	0.000182987	0.000129283	0.000135374	0.0001059	0.000121006	0.000127865	0.000133978	0.000161489	0.000120409	0.000127115	0.000193322	0.000107146	0.000145415	0.000159119	0.000152874	0.000136853	0.000158576	0.000153905	0.000136214	0.000134442	0.00020082	9.93951e-05	0.00011303	0.00015235	0.000158566	0.000155403	0.000134167	0.000153936	0.000122014	0.000180376	0.000136553	0.000115181	0.000147012	0.000109792	0.000143804	0.000183655	0.000151461	0.000127398	0.000198863	0.000177844	0.000148081	0.000146823	0.000138488	0.000143038
170	PE(16:0/18:3)	0.967409	712.493	391.87	1.50743e-05	2.05241e-05	8.68884e-06	2.36696e-05	1.35798e-05	1.69504e-05	1.73685e-05	1.6728e-05	2.31631e-05	1.67018e-05	2.41621e-05	6.84655e-06	1.60915e-05	2.51726e-05	1.86209e-05	2.39137e-05	1.58083e-05	1.29404e-05	2.14979e-05	3.44925e-05	1.85997e-05	2.44168e-05	1.51373e-05	1.44286e-05	1.69913e-05	1.25757e-05	1.26575e-05	1.99574e-05	2.35881e-05	1.29925e-05	1.41809e-05	1.79567e-05	1.34435e-05	1.85221e-05	1.76867e-05	1.37136e-05	1.18155e-09	3.11973e-05	2.3346e-05	9.02641e-06	1.40581e-05	1.62939e-05	1.93411e-05	1.93094e-05	2.18281e-05
78	PE(16:0/20:3)	0.991689	742.537	427.742	0.00186783	0.000246865	0.00143274	0.00102068	0.000162782	0.0010753	0.000184477	0.000919023	0.00100094	0.00110291	0.00101114	0.000596937	0.000915568	0.000218091	0.00106759	0.00163322	0.000193001	0.000617584	0.000433961	0.000165068	0.000793286	0.000200733	0.00118844	0.000413955	0.000217209	0.000767225	0.00100123	0.000801695	1.19335e-09	0.000832332	0.00134403	0.00107574	0.000655129	0.000950931	0.000801818	0.000893151	0.00124655	0.000243211	0.000171739	0.000821987	0.000146979	0.000688704	0.000171881	0.00086143	0.000942254
73	PE(16:0/20:4)	0.992144	740.55	454.446	1.72154e-05	4.82215e-05	4.55045e-05	4.12529e-05	3.48105e-05	8.21746e-06	1.17561e-05	2.80874e-05	3.8755e-05	1.77986e-05	3.84967e-05	1.34549e-05	4.11304e-05	2.9557e-05	4.22797e-05	4.00879e-05	4.18465e-05	1.01855e-05	3.94181e-05	1.80222e-06	2.94939e-05	2.47542e-05	3.72074e-05	1.74948e-05	4.52009e-05	1.285e-05	3.41668e-05	8.43723e-06	5.73241e-06	3.17743e-05	2.96423e-05	9.75749e-06	2.96402e-05	3.75387e-06	1.0349e-05	3.66759e-05	3.06701e-05	1.22369e-05	3.24166e-05	4.81483e-05	4.42947e-05	2.52602e-05	1.08114e-05	4.98026e-06	2.81803e-05
557	PE(16:0/22:3)	0.868648	770.557	459.075	4.57478e-09	0.000478086	0.000596682	0.000506983	0.000574766	0.00064123	0.000619901	0.000506294	0.000566595	0.000562225	0.000503475	0.000534597	0.000436374	0.000477198	0.000510483	0.00046331	0.000553928	0.000480276	0.000565691	0.000548804	0.000506345	0.000518619	0.000555069	0.000614714	0.000526241	0.000513311	0.000539885	0.000483891	0.000590776	0.000562975	0.000554664	0.000624679	0.00063278	0.000541159	0.000479047	0.000510079	0.000544395	0.00060844	0.000441939	0.000513093	0.00055036	0.000545306	0.000538968	0.000499356	0.000492851
85	PE(16:0/22:5)	0.990311	766.536	431.67	4.57478e-09	0.000217486	0.00025058	0.000336367	0.000282915	0.000302295	0.000282365	0.000284461	0.000277979	0.000251597	0.000250693	0.00022367	0.000345451	0.000273379	0.000333608	0.000320854	0.000311675	0.000273908	0.000295419	0.000377606	0.000274616	0.00030001	0.000255241	0.000291962	0.000225095	0.000257374	0.0002653	0.00027827	0.000288343	0.000329745	0.000318103	0.000266452	0.000320518	0.0002646	0.000233348	0.000263317	0.000329459	0.000366889	0.000243912	0.000262557	0.000210552	0.000278552	0.000295493	0.000272383	0.000255492
77	PE(16:0/22:6)	0.991744	764.522	398.999	4.57478e-09	0.000608437	0.000709639	0.000546883	0.000624128	0.000754849	0.000659537	0.000704291	0.000931803	0.000945093	0.000588634	0.000900297	0.000728071	0.000949114	0.000760967	0.000739904	0.00077871	0.000568266	0.000738995	0.000862045	0.000704983	0.000731777	0.000777248	0.00100571	0.000761797	0.000663225	0.000717058	0.000754291	0.000976413	0.000709777	0.000866545	0.00102075	0.000670347	0.000968717	0.000804205	0.000981618	0.000844566	0.00115998	0.000962376	0.0007544	0.000853659	0.000849223	0.000789709	0.000734012	0.000776703
604	PE(16:0/24:4)	0.836698	794.563	485.111	5.23495e-05	1.40251e-05	9.90885e-06	1.1812e-05	1.11318e-05	9.99295e-06	0.000323028	0.000298746	0.000229347	7.69852e-06	1.04496e-05	1.03355e-05	6.7633e-06	0.000322406	0.000279524	1.35078e-05	0.000294149	9.03351e-06	8.89381e-06	9.89334e-06	9.66498e-05	0.000267224	1.09406e-05	0.000256351	1.06438e-05	7.46302e-06	1.27759e-05	0.000283143	0.000261885	0.000338002	0.000354642	0.000232813	0.000317203	8.78465e-06	0.000352341	0.000215755	1.06471e-05	0.000314863	0.000261676	1.3241e-05	1.1897e-05	0.000177114	7.1014e-06	0.000269449	0.00027992
553	PE(16:0e/20:4)	0.870266	724.529	472.113	2.16115e-05	1.55636e-05	1.02899e-05	1.72369e-05	1.73723e-05	1.75486e-05	1.98746e-05	1.55677e-05	1.18992e-09	1.32861e-05	1.63697e-05	1.27464e-05	1.24558e-05	1.70526e-05	1.42176e-05	1.38913e-05	1.4617e-05	1.65965e-05	1.69287e-05	1.88864e-05	1.51057e-05	2.23865e-05	1.51154e-05	1.27483e-05	2.0994e-05	1.7541e-05	1.45302e-05	1.88021e-05	1.19335e-09	2.11608e-05	1.49595e-05	1.24141e-05	1.6988e-05	1.21068e-09	1.29905e-09	1.95019e-05	2.30592e-05	2.14668e-05	1.73673e-05	1.25877e-05	1.52079e-05	1.48417e-05	1.43896e-05	1.74526e-05	1.51257e-05
799	PE(16:0e/21:2)	0.647768	744.59	495.978	0.000678126	0.000469242	0.000420084	0.000328568	0.000379574	0.00043428	0.000397979	0.000434006	0.000529813	0.000416209	0.000506015	0.000510057	0.000398152	0.000455227	0.000420539	0.000429266	0.000377568	0.000468932	0.000513432	0.000479938	0.00045235	0.000651933	0.000344845	0.000466871	0.000372517	0.000409782	0.000428717	0.000406228	0.000463901	0.000397592	0.000490239	0.000313679	0.000319947	0.000552354	0.000414723	0.000372214	1.18155e-09	0.000539065	0.000432145	0.000342257	0.00046057	0.000408979	0.000433887	0.000425386	0.000476017
822	PE(16:0e/22:6)	0.610829	748.519	423.159	4.57478e-09	0.000193837	0.00019525	0.000123635	0.000163814	0.000220325	0.000263526	0.000185854	0.000267473	0.000221916	0.000213348	0.000236861	0.000185516	0.000245602	0.0002024	0.000189959	0.000265377	0.000208344	0.000205698	0.000209009	0.000199887	0.00029715	0.000218723	0.000276621	0.000232944	0.000195779	0.000212474	0.000278901	0.000251015	0.000245196	0.000258496	0.000278254	0.00025114	0.000222731	0.000277583	0.000237833	0.000317389	0.000250621	0.000287328	0.000185124	0.000244751	0.000251003	0.00020356	0.000218849	0.000224115
69	PE(16:1/18:2)	0.993801	714.507	375.525	3.64879e-05	5.8909e-05	2.14524e-05	4.97112e-05	2.52274e-05	3.10881e-05	3.56919e-05	4.51549e-05	4.25945e-05	3.80612e-05	4.34288e-05	1.97489e-05	5.02978e-05	4.71817e-05	4.29363e-05	7.21894e-05	2.95244e-05	2.55689e-05	5.65008e-05	5.15496e-05	4.11653e-05	5.38503e-05	4.03547e-05	3.81548e-05	5.38485e-05	4.39027e-05	3.19533e-05	3.90175e-05	5.0743e-05	3.06203e-05	3.14908e-05	6.08951e-05	3.55936e-05	4.98133e-05	3.69364e-05	4.47933e-05	4.43546e-05	5.03007e-05	4.07672e-05	2.66443e-05	4.08559e-05	4.22445e-05	3.91034e-05	3.79469e-05	3.87227e-05
352	PE(16:1/20:4)	0.908958	736.532	403.281	8.91639e-06	9.56178e-07	2.52989e-06	1.28133e-09	1.05891e-06	1.70601e-06	2.08377e-06	1.6697e-06	1.18992e-09	1.54612e-06	1.228e-09	2.7484e-06	3.29399e-06	1.13521e-06	1.35771e-06	2.16164e-06	1.96186e-06	1.76428e-06	1.97347e-06	8.64251e-07	1.88657e-06	1.55731e-06	1.14079e-06	1.18042e-06	1.30306e-06	1.85549e-06	1.07893e-06	1.43221e-06	9.5786e-07	1.68425e-06	1.70453e-06	1.44047e-06	1.0116e-06	5.49096e-07	1.16822e-06	1.42013e-06	9.76789e-07	1.12804e-06	1.26418e-06	1.81728e-09	1.82364e-06	1.23394e-06	1.46202e-06	1.84583e-06	1.40652e-06
64	PE(16:1/22:6)	0.995302	762.505	352.134	2.69348e-05	6.77855e-05	3.39974e-05	3.26824e-05	2.73668e-05	3.60753e-05	3.39312e-05	5.5539e-05	7.23204e-05	4.41826e-05	4.78329e-05	2.92622e-05	5.34316e-05	4.94366e-05	5.75854e-05	8.38087e-05	3.75646e-05	2.86527e-05	5.01523e-05	6.45873e-05	4.66565e-05	5.20512e-05	5.3279e-05	4.44942e-05	6.16878e-05	3.55352e-05	3.31483e-05	5.79245e-05	6.38861e-05	3.18439e-05	4.83177e-05	6.59653e-05	2.972e-05	8.06576e-05	6.09387e-05	4.96392e-05	5.44775e-05	4.92051e-05	6.37196e-05	2.24116e-05	3.56082e-05	4.97255e-05	4.63228e-05	4.69087e-05	4.62641e-05
202	PE(16:1e/18:2)	0.959144	698.512	445.538	4.57478e-09	0.000233202	0.000203581	0.000272613	0.000244211	0.000242672	0.000299687	0.00017357	0.000181231	0.000269369	0.000255401	0.000151603	0.000155901	0.000289443	0.000216592	0.000227529	0.000190627	0.000231948	0.000262066	0.000254557	0.00021779	0.000379824	0.000211057	0.000193061	0.000226155	0.000181354	0.000243471	0.000269137	0.000311403	0.000214269	0.000242289	0.000210873	0.000230475	0.000216967	0.000233901	0.000257748	1.18155e-09	1.27249e-09	0.000217663	0.000216003	0.000224401	0.000214003	0.000225658	0.000241044	0.000248748
321	PE(16:1e/20:4)	0.927809	722.513	436.826	4.57478e-09	0.00263674	0.00288641	0.0028613	0.0031551	0.00284261	0.00373643	0.0024962	0.00292499	0.00296247	0.00266084	0.00294338	0.00248722	0.00333693	0.00300665	0.00250648	0.00278045	0.00327593	0.00302556	0.00307611	0.00278009	0.00373064	0.00275902	0.003181	0.00290148	0.00299859	0.003032	0.00388101	0.0034114	0.00351451	0.00356303	0.00288389	0.00316755	0.00327184	0.00293913	0.00317734	0.00402368	0.00396886	0.00275823	0.00285858	0.00315707	0.00325894	0.00281602	0.00309424	0.00312941
794	PE(16:1e/20:5)	0.652367	720.496	403.657	3.64841e-05	2.31343e-05	1.50975e-05	1.32297e-05	2.15392e-05	1.56596e-05	2.07737e-05	1.24758e-05	2.93873e-05	1.52385e-05	1.6072e-05	3.91197e-05	1.41173e-05	2.97537e-05	2.0329e-05	2.50486e-05	1.47078e-05	2.03139e-05	1.70307e-05	1.73471e-05	2.0843e-05	4.21913e-05	1.75661e-05	2.74395e-05	1.93668e-05	2.71296e-05	2.6315e-05	3.28065e-05	2.36164e-05	2.53986e-05	1.76595e-05	3.24592e-05	1.95421e-05	2.01092e-05	2.52834e-05	2.81219e-05	2.79381e-05	3.99392e-05	2.63119e-05	1.85308e-05	3.66063e-05	2.67166e-05	2.1925e-05	2.30134e-05	2.40165e-05
776	PE(16:1e/22:6)	0.682531	746.552	466.072	3.67084e-06	2.193e-06	3.01994e-06	1.28133e-09	1.91489e-06	2.49972e-06	3.07363e-06	2.15784e-06	2.11024e-06	2.74141e-06	3.64581e-06	2.58432e-06	3.11175e-06	2.79068e-06	2.40598e-06	8.24712e-07	3.15244e-06	2.48672e-06	2.61632e-06	3.45988e-06	2.52307e-06	2.36134e-06	2.02944e-06	1.22256e-09	2.92694e-06	1.97693e-06	4.83583e-06	3.08214e-06	2.81522e-06	2.29403e-06	2.79863e-06	2.2519e-06	2.18909e-06	2.20388e-06	1.41809e-06	1.79172e-06	2.04071e-06	1.27249e-09	1.27449e-09	1.47765e-06	3.4099e-06	2.09536e-06	2.92852e-06	1.8363e-06	2.66807e-06
195	PE(16:1e/24:4)	0.961007	778.577	523.564	0.000288791	0.000128548	0.000181249	0.000292482	0.000177213	0.000204805	0.000210365	0.000197657	0.000231156	0.000151994	0.000173817	0.000192331	0.000163546	0.000219548	0.000168335	0.00031876	0.00019368	0.000226329	0.000195809	0.000327518	0.000212197	0.000273443	0.000210729	0.000248815	0.000164301	0.000278411	0.000215596	0.000244148	0.000250466	0.000265327	0.000248282	0.000248437	0.000236128	0.000338403	0.000157338	0.000217502	0.000218257	1.27249e-09	0.000184776	0.000254246	0.000171088	0.000221285	0.000210701	0.000226282	0.000230508
572	PE(16:1e/26:4)	0.862745	806.606	559.845	3.52513e-05	1.62364e-05	2.08678e-05	3.80497e-05	2.28016e-05	2.99927e-05	2.19781e-05	1.96405e-05	2.11168e-05	1.96657e-05	1.89413e-05	1.92827e-05	1.6463e-05	2.41426e-05	1.71728e-05	2.55484e-05	2.14378e-05	2.26247e-05	2.2294e-05	3.49946e-05	2.34251e-05	3.11972e-05	1.79175e-05	2.33999e-05	2.41308e-05	3.41595e-05	2.42801e-05	2.82894e-05	3.12417e-05	3.54303e-05	3.01933e-05	2.83729e-05	2.64035e-05	2.63632e-05	1.98083e-05	2.92319e-05	3.0273e-05	1.27249e-09	1.87908e-05	3.22667e-05	2.04012e-05	2.56076e-05	2.3398e-05	2.61172e-05	2.64649e-05
269	PE(16:2e/20:4)	0.945997	720.496	391.971	4.57478e-09	3.68698e-05	2.50558e-05	4.51885e-05	2.84813e-05	3.1134e-05	4.86209e-05	2.83555e-05	3.85562e-05	3.25631e-05	3.57599e-05	2.83146e-05	2.31938e-05	1.13128e-09	4.15728e-05	3.20827e-05	3.02924e-05	3.72025e-05	4.26161e-05	5.05028e-05	3.18184e-05	1.30829e-09	2.48227e-05	3.16375e-05	2.87403e-05	4.05743e-05	3.55814e-05	5.45038e-05	4.29434e-05	3.94334e-05	4.18866e-05	3.98762e-05	3.75178e-05	4.8061e-05	4.29612e-05	3.16574e-05	1.18155e-09	1.27249e-09	3.94698e-05	3.19926e-05	3.43103e-05	3.22987e-05	4.67641e-05	4.27524e-05	5.06047e-05
855	PE(16:2e/23:0)	0.563404	772.62	510.563	0.000173932	0.000119588	6.75874e-05	0.0001191	0.000113932	0.000139035	0.000118316	0.000111514	8.35788e-05	0.000144943	9.30392e-05	8.94704e-05	0.000103593	0.000131811	0.000145536	0.000150652	0.000116175	0.00012611	0.000119397	0.000153517	0.000121041	0.0001891	0.000124593	0.000168396	7.7516e-05	0.00010462	0.000102051	9.74518e-05	6.89699e-05	0.000111015	0.000136014	8.37427e-05	0.000117513	0.000128551	0.000100809	9.62644e-05	0.000125323	0.000166689	0.000170895	0.000118273	0.000119021	0.00012034	0.000112874	0.000130657	0.000127064
91	PE(16:3/24:4)	0.98828	790.535	390.714	0.0004171	0.000275198	0.000328779	0.000243184	0.000309558	0.000291528	0.000350719	0.000371689	0.000344775	0.000297364	0.000274902	0.000310509	0.000418676	0.000316186	0.000275973	0.00022175	0.000332962	0.00027419	0.00028088	0.000343549	0.000313974	0.00016158	0.000315762	0.000276901	0.000348425	0.000273757	0.000215245	0.000302109	0.000329367	0.000322053	0.000291322	0.000321664	0.000509559	0.000417063	0.000416896	0.000243689	0.000283083	1.27249e-09	0.000220587	0.000291757	0.000236427	0.000288862	0.000300258	0.000287582	0.000295948
550	PE(17:0/18:2)	0.870804	728.522	444.337	4.57478e-09	2.44914e-05	1.91144e-05	2.28213e-05	3.22976e-05	3.25728e-05	2.19591e-05	1.803e-05	2.10614e-05	2.85104e-05	2.00101e-05	1.24543e-05	1.86162e-05	2.46001e-05	2.42327e-05	1.27075e-09	1.66553e-05	1.25746e-05	2.73062e-05	2.32213e-05	2.00267e-05	1.30829e-09	2.31383e-05	2.30712e-05	2.0777e-05	2.15828e-05	2.89904e-05	1.67705e-05	2.37981e-05	2.03784e-05	2.01517e-05	2.16568e-05	2.00286e-05	1.91689e-05	2.01228e-05	2.15219e-05	1.18155e-09	3.154e-05	2.50681e-05	1.45813e-05	2.07245e-05	1.96537e-05	2.14029e-05	2.28313e-05	2.31405e-05
224	PE(17:0/20:4)	0.954185	752.522	422.653	4.57478e-09	1.18582e-05	1.12384e-05	6.71508e-06	1.39311e-05	1.35098e-09	1.49044e-05	1.38964e-05	1.43985e-05	1.04036e-05	1.24213e-05	1.08537e-05	1.45751e-05	1.1983e-05	1.23669e-05	9.78294e-06	6.60449e-06	6.98558e-06	1.14422e-05	9.73592e-06	1.02051e-05	9.35185e-06	1.29706e-05	1.14024e-05	8.60413e-06	1.00702e-05	8.906e-06	6.74322e-06	1.11885e-05	9.40756e-06	1.07763e-05	1.09689e-05	1.37873e-05	1.20178e-05	1.09812e-05	7.49852e-06	9.42133e-06	1.38833e-05	9.91382e-06	1.81728e-09	9.07826e-06	9.84865e-06	1.0041e-05	9.17032e-06	9.96696e-06
209	PE(17:1/20:4)	0.957847	750.524	345.591	7.95969e-07	2.89042e-07	3.9877e-07	1.28133e-09	1.06107e-07	3.10362e-07	1.30837e-09	1.33023e-09	1.18992e-09	3.30167e-07	1.52293e-07	1.08778e-07	3.12794e-07	3.23753e-07	1.32527e-09	1.85475e-07	1.42618e-09	8.5932e-08	2.50629e-07	1.17511e-09	1.82955e-07	3.38201e-07	1.33834e-07	1.85892e-07	2.39809e-07	6.30203e-07	1.46205e-09	1.58489e-07	9.52895e-08	2.09456e-07	3.58214e-07	2.58213e-07	2.09763e-06	2.96397e-07	1.60398e-07	1.62455e-07	3.90955e-07	3.00836e-07	2.26243e-07	1.14726e-07	1.32969e-09	3.18002e-07	3.17052e-07	3.34491e-07	3.06241e-07
917	PE(18:0/18:0)	0.342704	748.609	504.199	0.000167152	0.000238407	0.000192643	0.000160236	0.000193091	0.000183189	0.000237451	0.000192712	0.000241514	0.000214816	0.000257408	0.00014142	0.000175804	0.000199233	0.000267118	0.000216885	0.000182106	0.000234891	0.000200428	0.000251194	0.000207385	0.000271477	0.000245582	0.000247761	0.000169824	0.000177228	0.00017358	0.000205294	0.000210592	0.000161806	0.000250711	0.000175873	0.000190239	0.000248066	0.000212737	0.00016346	0.000307422	0.00025724	0.000316684	0.000130306	0.000238123	0.0002177	0.00021929	0.000202504	0.000206164
399	PE(18:0/18:1)	0.890533	744.544	466.882	4.57478e-09	0.00018708	0.000163048	0.000189181	0.000177058	0.00019516	0.000191084	0.000153135	0.000142127	0.000207884	0.000186168	0.000121978	0.000151302	0.000206197	0.000187932	0.00019576	0.000153303	0.000130628	0.000184568	0.000203348	0.000166347	0.000231595	0.000173518	0.0001633	0.000172011	0.00013348	0.000199912	0.000170465	0.000215114	0.000157081	0.000170129	0.000186163	0.000153901	0.000173558	0.000161198	0.000166942	1.18155e-09	1.27249e-09	0.00017317	0.000133044	0.000192951	0.000156377	0.00016822	0.00017721	0.000172572
587	PE(18:0/18:2)	0.851137	742.54	466.818	4.57478e-09	0.00152473	0.00127705	0.00157851	0.00151716	0.00162966	0.00161369	0.00126452	0.00121521	0.00171733	0.00156867	0.00097424	0.00128399	0.00175054	0.00150791	0.00168684	0.00128311	0.00108866	0.00160408	0.00168245	0.00138842	0.00197977	0.00148427	0.00131138	0.00141743	0.00117199	0.00168728	0.00149498	0.00171746	0.00136413	0.0012955	0.00161582	0.00131512	0.00147502	0.00131812	0.00140438	1.18155e-09	1.27249e-09	0.00151199	0.00108831	0.0016184	0.00131357	0.0013419	0.00143929	0.00153718
106	PE(18:0/18:5)	0.982612	738.504	419.638	7.01427e-05	3.44121e-05	3.27799e-05	4.13954e-05	4.2296e-05	4.18362e-05	4.14733e-05	2.94476e-05	2.69182e-05	4.27756e-05	3.03267e-05	2.73032e-05	3.34823e-05	3.88427e-05	4.1515e-05	3.10634e-05	3.13094e-05	3.45042e-05	4.08123e-05	3.34615e-05	3.73049e-05	3.56819e-05	3.75105e-05	3.14947e-05	3.73284e-05	2.84109e-05	4.03192e-05	2.70356e-05	3.84162e-05	3.0113e-05	2.75431e-05	3.64295e-05	3.01076e-05	2.87775e-05	3.12631e-05	3.53641e-05	3.18207e-05	4.5205e-05	3.73598e-05	3.80247e-05	4.19578e-05	3.45082e-05	3.42522e-05	3.24882e-05	3.1109e-05
573	PE(18:0/20:2)	0.862643	770.572	503.901	4.57478e-09	0.000111696	0.000137791	0.000119211	0.000104196	0.000110148	8.80154e-05	8.37036e-05	0.000107882	0.000123075	9.18694e-05	8.19691e-05	7.26296e-05	0.000117194	0.000104365	0.000120259	9.76948e-05	7.60524e-05	9.33886e-05	0.000132828	9.86987e-05	0.000132797	9.58318e-05	7.8459e-05	0.000115682	0.000113179	0.000147316	0.000144361	0.000111802	0.000107187	8.24646e-05	0.000100672	9.89473e-05	1.21068e-09	0.000114793	0.000112033	0.000130295	0.000148876	8.82548e-05	7.10521e-05	0.000110359	0.000105218	0.000103289	0.000108481	0.000108587
336	PE(18:0/20:3)	0.917481	768.552	478.118	0.000764574	0.0016851	0.000655657	0.00150323	0.000985819	0.000642082	0.00112127	0.000809577	0.00084836	0.00141756	0.00129237	0.00119561	0.0010273	0.00140628	0.00135566	0.00117571	0.000971952	0.00122872	0.000902144	0.00176382	0.00113764	0.00105684	0.000879565	0.000738015	0.00111712	0.0013734	0.00096357	0.00133172	0.00119114	0.00156583	0.000799388	0.00107544	0.0017675	0.000954455	0.0013537	0.00105214	0.00113326	0.00151569	0.00156799	0.000634753	0.00114612	0.00116088	0.00140426	0.00148132	0.000983204
149	PE(18:0/20:4)	0.974899	766.537	459.737	4.57478e-09	0.00301609	0.00310243	0.00313334	0.00347035	0.00408328	0.00365036	0.00301221	0.00355808	0.00332426	0.00310387	0.00294406	0.00258838	0.00298771	0.00293119	0.00277688	0.00300459	0.00284549	0.00314711	0.00368694	0.00301833	0.00318247	0.00323989	0.00330172	0.0026732	0.00289503	0.00317157	0.00373126	0.00333462	0.00359724	0.00333165	0.00357399	0.00364115	0.00354141	0.00294236	0.0029205	0.00366365	0.00377971	0.00268257	0.00270632	0.00275687	0.00323336	0.002957	0.00311322	0.00309329
796	PE(18:0/22:3)	0.651508	796.575	490.253	4.57478e-09	3.16957e-05	4.6977e-05	3.8002e-05	2.64641e-05	4.12991e-05	4.44998e-05	4.09812e-05	3.03285e-05	3.60187e-05	4.00855e-05	3.00025e-05	3.79458e-05	4.68121e-05	3.79e-05	2.65714e-05	4.09407e-05	3.72095e-05	4.1962e-05	3.73204e-05	3.5651e-05	3.77494e-05	2.34211e-05	3.61354e-05	2.77996e-05	4.06592e-05	2.62339e-05	3.88554e-05	3.5313e-05	4.62896e-05	4.8528e-05	3.2708e-05	4.34845e-05	3.96927e-05	4.72862e-05	3.00651e-05	3.98527e-05	4.35726e-05	3.58557e-05	3.03463e-05	2.46921e-05	3.6427e-05	3.59719e-05	3.83585e-05	3.84834e-05
606	PE(18:0/22:5)	0.835949	794.567	476.346	0.000182724	0.000201141	0.000269035	0.000230549	0.000193861	0.000229294	0.00039258	0.00028991	0.000182095	0.000251032	0.000245378	0.000109565	0.000389187	0.000296448	0.000313882	0.000158889	0.00034089	0.000311419	0.000251242	0.000316422	0.000257777	0.000198285	0.000182271	0.000174876	0.000171182	0.000190858	0.000196018	0.000226068	0.000259403	0.000282463	0.000407986	0.000148599	0.000353826	0.000228098	0.000335762	0.000216012	0.000254703	0.000318964	0.000228134	0.000143055	0.000128311	0.000232244	0.000242112	0.000241961	0.000261055
592	PE(18:0/22:6)	0.846293	790.538	447.71	0.000479642	0.00066335	0.000764909	0.000332241	0.000534637	0.000724084	0.000986938	0.00090525	0.000880034	0.00100561	0.000829265	0.000784937	0.000639051	0.00102048	0.000843623	0.000545717	0.00079876	0.000529596	0.000634655	0.000930907	0.000741685	0.000836579	0.00080984	0.00117318	0.000620719	0.000557777	0.000598022	0.00075897	0.000910715	0.000590962	0.00123546	0.00077998	0.000744759	0.00102818	0.0011138	0.000860812	0.00107155	0.00100395	0.00116752	0.000398974	0.000681653	0.00084717	0.000762975	0.000809027	0.000842011
289	PE(18:0/24:4)	0.942037	822.552	502.461	4.31235e-06	1.33755e-09	5.34721e-06	1.99352e-06	1.47131e-09	1.48603e-06	3.6751e-06	2.98198e-06	2.63492e-06	1.89138e-06	3.48348e-06	3.76413e-06	4.40676e-06	4.45769e-06	3.28815e-06	2.38153e-06	3.02686e-06	2.79513e-06	3.38324e-06	2.08879e-06	2.87005e-06	4.05965e-06	3.05738e-06	2.28809e-06	3.43874e-06	3.09065e-06	4.96594e-06	1.21998e-09	3.79845e-06	2.85914e-06	2.78087e-06	1.48415e-06	4.76662e-06	5.40844e-06	4.31861e-06	3.05028e-06	3.65085e-06	5.95979e-06	3.64278e-06	1.85644e-06	3.12254e-06	3.38003e-06	3.42803e-06	2.70637e-06	2.13494e-06
692	PE(18:0e/20:4)	0.762294	752.561	500.897	4.57478e-09	0.000203935	0.000153472	0.000209078	0.000201052	0.000197519	0.000251016	0.00020567	0.00020502	0.00020841	0.000226951	0.00018508	0.000238599	0.000280976	0.000207122	0.00019803	0.000217343	0.000211262	0.00022674	0.000262472	0.000204487	1.30829e-09	0.000209575	0.000230945	0.000217862	0.000218759	0.000193138	0.00024996	0.000233955	0.000249252	0.000213349	0.000192795	0.00025653	0.000239943	0.000248037	0.000213858	0.000294773	1.27249e-09	0.000270428	0.000194734	0.000209053	0.000206847	0.000216716	0.000235566	0.000230954
52	PE(18:1/18:2)	0.997158	742.527	411.742	4.57478e-09	0.000270566	0.000323085	0.000270142	0.000318391	0.000370523	0.000315226	0.000318233	0.000280705	0.000273078	0.000229816	0.000288933	0.000270291	0.000261022	0.000311332	0.000281216	0.000299017	0.000279427	0.000318456	0.000362467	0.000282097	0.000247251	0.000318159	0.000276716	0.000285957	0.000242495	0.000280129	0.000267753	0.000321038	0.000296798	0.000310078	0.000335552	0.000326299	0.000299408	0.000251311	0.000246504	0.000299251	0.000347446	0.000249611	0.000289473	0.000303455	0.000289734	0.000277533	0.000270535	0.00027556
605	PE(18:1/20:3)	0.836537	766.539	438.073	0.000192187	0.000202882	0.000145442	0.000228994	0.000264066	0.000116766	0.000163684	0.000144477	0.000150784	0.000151233	0.000138315	0.000122383	0.000208245	0.000216188	0.000172967	0.000187169	0.000140076	0.000125352	0.000184655	0.000212604	0.000173423	0.000189702	0.000174718	0.000117482	1.43359e-09	0.000179538	0.000205517	0.000252551	0.000190653	0.000187639	0.000137911	0.000203661	0.000161381	0.000180909	0.00022613	0.000299619	0.000197898	0.000276594	0.000148657	0.000139596	0.000208193	0.000183918	0.000161004	0.000173755	0.000177161
218	PE(18:1/20:4)	0.955261	764.533	434.858	4.57478e-09	6.10586e-05	0.000110643	0.000157734	0.000131805	0.00013609	1.30837e-09	0.00012433	0.000130074	0.000127317	0.000108178	9.28022e-05	5.39017e-05	0.000137646	0.000140853	0.000139682	0.000140403	0.000132147	0.000145175	1.17511e-09	0.000103492	7.61581e-05	0.000111401	0.000130659	0.000101613	0.000102592	0.00012313	0.000132489	0.000126308	0.000155839	0.000155742	0.000129789	0.000144022	0.000128846	0.000116671	0.000120073	0.000159343	0.000182708	0.000119278	0.00010822	8.67039e-05	0.000125579	0.000119573	0.000125717	0.000133905
872	PE(18:1/22:4)	0.546654	792.546	448.2	4.57478e-09	0.000131494	0.000157274	0.000114526	0.000107232	0.000139874	0.000171996	0.000163749	0.000166088	0.000171816	0.000144259	0.000140599	0.000134567	0.000179281	0.000164072	0.000112933	0.000181205	0.000113528	0.000132436	0.000160609	0.000139377	0.000150583	0.000139404	0.000182325	0.0001282	0.000130774	0.000115575	0.000161118	0.000160798	0.000133659	1.19971e-09	0.000149861	0.000166535	0.000185383	0.000191855	0.000150109	0.000186801	0.000190668	0.000188537	0.000102092	0.000121646	0.000146796	0.000144589	0.000152212	0.000155449
734	PE(18:1/22:5)	0.74152	790.585	464.432	6.1912e-06	2.51729e-06	2.26933e-06	2.68603e-06	1.09316e-06	2.98326e-06	3.20696e-06	1.32317e-06	8.15456e-07	1.24641e-09	2.80613e-06	7.62482e-07	1.0346e-06	7.33928e-07	1.68241e-06	2.50022e-06	1.38766e-06	4.00751e-06	2.61191e-06	2.15214e-06	2.1383e-06	4.24571e-06	3.9757e-06	1.68106e-06	1.82816e-06	1.07374e-06	3.70417e-06	1.64146e-06	2.33893e-06	2.52383e-06	1.30881e-06	1.43335e-06	2.02316e-06	1.31163e-06	2.03069e-06	2.84143e-06	4.58944e-06	1.27249e-09	2.29668e-06	2.67009e-06	3.2494e-06	2.33843e-06	1.42321e-06	1.8247e-06	1.30116e-06
709	PE(18:1/22:6)	0.753271	788.523	405.121	0.000414347	0.000771454	0.000901285	0.000333247	0.000431897	0.000514155	0.000573992	0.000753358	0.0009132	0.000812858	0.000688599	0.000656034	0.000620997	0.000669305	0.000757765	0.000708461	0.000529816	0.000432325	0.000925428	0.000754349	0.000658144	0.000782414	0.000670088	0.000784755	0.000701155	0.000527834	0.000480417	0.000797693	0.000584145	0.000413965	0.00089838	0.000693941	0.000374246	0.000955368	0.000868462	0.00089285	0.000759284	0.00078214	0.000798969	0.000351916	0.000714874	0.000691645	0.000619909	0.00065151	0.000669905
802	PE(18:1e/21:2)	0.643021	770.597	504.945	0.000119294	7.09377e-05	7.65511e-05	5.56668e-05	6.36525e-05	6.21714e-05	7.11832e-05	6.91548e-05	8.03235e-05	8.66824e-05	7.64569e-05	7.64936e-05	6.1272e-05	7.03517e-05	8.56053e-05	7.90493e-05	5.98661e-05	7.84742e-05	7.75473e-05	7.54957e-05	7.48115e-05	1.30829e-09	7.16127e-05	6.63034e-05	5.2998e-05	6.83753e-05	6.99457e-05	5.85884e-05	6.91084e-05	5.46971e-05	7.22225e-05	5.06923e-05	5.83579e-05	8.09131e-05	6.62934e-05	5.74319e-05	1.18155e-09	8.90175e-05	8.61215e-05	6.72265e-05	7.62814e-05	6.08095e-05	7.55738e-05	6.82587e-05	6.86409e-05
358	PE(18:1e/24:4)	0.907238	806.596	579.867	7.67891e-05	9.15366e-05	4.96802e-05	2.29655e-05	3.64171e-05	2.37524e-05	2.26618e-05	0.000118495	0.000131018	0.000121906	5.77e-05	0.000108603	0.00011145	3.72061e-05	8.2429e-05	2.76326e-05	5.96517e-05	2.39186e-05	0.000167452	1.17511e-09	6.85633e-05	6.29006e-05	7.17843e-05	2.39103e-05	2.2286e-05	2.43817e-05	2.06467e-05	6.10619e-05	3.96997e-05	3.62813e-05	0.000150912	1.84701e-05	2.98518e-05	0.000146037	7.82895e-05	3.7226e-05	2.56581e-05	2.30774e-05	5.19614e-05	9.78287e-05	8.17702e-05	5.52018e-05	0.000128453	0.000140808	0.00013223
416	PE(18:1e/26:4)	0.885209	834.636	592.702	3.75598e-07	6.50499e-07	1.52293e-06	3.63352e-06	2.28608e-06	3.19133e-06	2.07134e-06	1.20596e-06	2.41269e-06	4.98435e-07	8.84476e-07	1.70475e-06	1.4288e-06	2.17831e-06	2.70676e-07	1.46373e-06	2.03166e-06	2.23892e-06	1.86698e-06	3.78333e-06	1.785e-06	3.29314e-06	7.98628e-07	2.77205e-06	2.3607e-06	3.00893e-06	1.99668e-06	3.5839e-06	3.10022e-06	3.11098e-06	3.30821e-06	3.01087e-06	2.79213e-06	2.31996e-06	1.90009e-06	2.45286e-06	3.027e-06	4.39615e-06	1.6422e-06	3.1404e-06	2.57243e-06	2.72938e-06	1.38561e-06	2.64851e-06	2.19622e-06
15	PE(18:2/18:2)	0.999989	740.521	387.317	0.00114159	0.000499493	0.000537222	0.000563467	0.000491324	0.00062046	0.000567744	0.000552619	0.000433808	0.000656431	0.000537371	0.000292865	0.000500526	0.000549968	0.000468671	0.000594649	0.00043124	0.000351487	0.000615941	0.000523765	0.000546532	0.000407505	0.000677228	0.000475611	0.000517096	0.000349409	0.000485182	0.000430558	0.000632266	0.00045535	0.000425766	1.26938e-09	0.000503955	0.000456808	0.000500236	0.000430368	0.000654632	0.000671846	0.000428642	0.000454779	0.00046826	0.000471275	0.000457148	0.000476195	0.00050204
70	PE(18:2/20:4)	0.993398	764.517	351.926	9.21953e-06	1.33755e-09	6.50064e-06	8.68091e-06	8.3222e-06	1.003e-05	7.22085e-06	1.142e-05	1.06874e-05	6.34846e-06	1.228e-09	7.00422e-06	1.04395e-05	9.2986e-06	9.58151e-06	1.10184e-05	8.38108e-06	7.58162e-06	7.48591e-06	1.215e-05	8.06867e-06	1.20377e-05	9.98057e-06	1.04621e-05	1.1758e-05	9.64617e-06	9.22878e-06	1.01733e-05	1.57841e-05	6.46535e-06	1.19971e-09	1.1637e-05	7.69841e-06	1.39837e-05	1.14717e-05	1.08664e-05	1.12478e-05	8.6828e-06	1.11795e-05	1.13999e-05	9.59795e-06	1.01651e-05	9.82976e-06	9.85204e-06	9.32199e-06
887	PE(18:2/22:4)	0.527262	790.537	379.079	9.25363e-06	8.36162e-06	6.16781e-06	8.2064e-06	6.6469e-06	9.45957e-06	8.50767e-06	8.89645e-06	8.09188e-06	7.04095e-06	7.72647e-06	5.92145e-06	6.98754e-06	8.45309e-06	6.85345e-06	9.32049e-06	5.53753e-06	6.26772e-06	5.893e-06	8.57865e-06	7.60861e-06	9.71829e-06	9.67421e-06	9.68879e-06	6.62859e-06	6.81744e-06	8.0951e-06	8.06394e-06	7.83253e-06	7.48059e-06	6.48565e-06	8.01875e-06	8.60682e-06	8.12017e-06	9.7777e-06	6.76704e-06	9.67436e-06	8.85133e-06	7.0258e-06	4.84257e-06	6.14067e-06	7.91552e-06	7.06047e-06	8.5293e-06	7.7848e-06
222	PE(18:2e/20:3)	0.954526	750.543	482.413	4.57478e-09	0.00375748	0.00428033	0.00451496	0.00349195	0.00347491	0.00412826	0.00335771	0.00386841	0.00457427	0.00345182	0.0041873	0.00397546	0.00364989	0.00429618	0.00339679	0.00325924	0.00481253	0.00467336	1.17511e-09	0.00355754	0.00597908	0.0034901	0.00528007	0.00355478	0.00346855	0.0036023	0.00375734	0.0033733	0.00504612	0.00400833	0.0032126	0.00352052	0.00435094	0.00301123	0.00419644	0.00394862	0.00491331	0.00356998	0.00377243	0.00316873	0.00396124	0.00337195	0.0035796	0.00362394
430	PE(18:2e/20:4)	0.87792	748.529	440.948	0.00162418	0.000558118	0.00127399	0.00117057	0.00107021	0.00111789	0.00150291	0.000527342	0.00140316	0.00123452	0.00101197	0.00127204	0.00101062	0.00122529	0.0011374	0.00102848	0.000879573	0.00119795	0.00126606	0.00143999	0.00114761	0.00155343	0.00118315	0.00111498	0.00107955	0.00125468	0.00103729	0.0014495	0.000899708	0.00137798	0.00125114	0.0012539	0.00129202	0.0013087	0.00115136	0.000983684	0.00134214	0.00135026	0.00114477	0.00102036	0.00122926	0.00121389	0.0010606	0.00122099	0.00119203
815	PE(18:2e/21:2)	0.623282	768.588	451.989	4.57478e-09	0.00191516	0.00172456	0.00168201	0.00237332	0.00207647	0.00264674	0.00215508	0.00208797	0.00237562	0.00236073	0.00171142	0.00176677	0.00208731	0.00207164	0.00174989	0.00178532	0.00234375	0.002278	0.00235647	0.00197741	0.0023586	0.001975	1.22256e-09	0.00148424	0.00199109	0.00156109	0.0023647	0.00256974	0.00199418	0.00250611	0.00183846	0.00228508	0.00255952	0.00210841	0.0021538	1.18155e-09	0.002773	0.00276796	0.00150927	0.00208641	0.00194433	0.00228507	0.00214007	0.00221192
864	PE(18:2e/22:2)	0.552233	780.59	534.466	4.57478e-09	4.79358e-05	3.68223e-05	4.5059e-05	3.8492e-05	6.71934e-05	3.93596e-05	5.68096e-05	4.99869e-05	4.75633e-05	5.94194e-05	3.8898e-05	5.48566e-05	6.66499e-05	4.91298e-05	5.14692e-05	6.15442e-05	4.48538e-05	6.02466e-05	7.15457e-05	4.9392e-05	1.30829e-09	4.70773e-05	4.91147e-05	4.85478e-05	5.07295e-05	4.3397e-05	5.15162e-05	5.34881e-05	6.02326e-05	5.53994e-05	4.47201e-05	6.59139e-05	5.37382e-05	5.08482e-05	3.83213e-05	1.18155e-09	1.27249e-09	4.85872e-05	1.81728e-09	4.47055e-05	4.03171e-05	5.31481e-05	5.55111e-05	5.54666e-05
361	PE(18:2e/22:4)	0.905888	776.552	469.957	4.57478e-09	0.000196406	0.000213571	0.000167191	0.000139489	0.000238204	0.000242169	0.000217541	0.000284927	0.000246925	0.000234548	0.000264986	0.000179337	0.000214601	0.000188652	0.000244823	0.000239641	0.000181818	0.000244025	0.000233852	0.000208635	0.000310992	0.000206656	0.00025079	0.000170569	0.0001825	0.000197286	0.000216092	0.000203393	0.00020397	0.000249051	0.00025574	0.000217619	0.000271516	0.00022675	0.000187483	0.000276438	0.000209514	0.000258777	0.000213774	0.000164252	0.000223658	0.0001975	0.00022399	0.000237827
672	PE(18:2e/22:5)	0.787904	774.543	469.851	4.57478e-09	0.000857645	0.00084781	0.000589806	0.000768377	0.00116401	0.00133142	0.00100484	0.00137144	0.00112185	0.00106494	0.00124607	0.00100511	0.00112548	0.000872985	0.00124135	0.0012005	0.000877562	0.00121876	0.00116279	0.00100364	0.00159505	0.00108043	0.00129202	0.000882294	0.000875883	0.00116412	0.00102207	0.00117021	0.00123646	0.00112307	0.00127331	0.00106084	0.00126832	0.00123327	0.00109673	0.00131595	0.00104612	0.00140161	0.00101129	0.00102661	0.00115878	0.000989655	0.00107243	0.00106748
780	PE(18:2e/22:6)	0.67693	772.528	428.379	0.00030498	0.000223518	0.0002678	0.000152022	0.000146352	0.000225124	0.0002869	0.000221158	0.000328044	0.000317183	0.000243294	0.000229831	0.000217243	0.000263697	0.000229532	0.000232787	0.000235223	9.24529e-05	0.000270989	0.000295363	0.000239175	0.000322495	0.000246886	0.00025919	0.000198813	0.000208443	0.000230247	0.000244416	0.000170978	0.000262775	0.000308069	0.000304654	0.00022981	0.00028083	0.00031488	0.000216	0.000361005	0.000262756	0.000305445	0.000209309	0.000238897	0.000258795	0.000225463	0.00023585	0.000250748
583	PE(18:2e/24:4)	0.853872	804.589	523.371	6.54473e-05	3.42464e-05	5.9707e-05	7.43098e-05	3.80051e-05	6.66286e-05	5.65808e-05	4.48111e-05	6.03584e-05	4.29599e-05	2.87688e-05	5.58579e-05	4.08956e-05	5.41284e-05	4.2602e-05	5.67297e-05	3.77239e-05	6.30312e-05	5.96732e-05	6.75454e-05	5.25005e-05	7.21912e-05	4.27224e-05	6.34354e-05	4.45896e-05	7.37925e-05	4.10495e-05	6.16306e-05	5.74014e-05	7.96552e-05	6.65188e-05	6.58116e-05	5.28165e-05	7.32824e-05	3.99584e-05	5.64185e-05	5.28667e-05	8.21063e-05	4.39197e-05	5.4497e-05	4.75705e-05	5.86117e-05	5.61107e-05	5.81943e-05	5.57264e-05
278	PE(18:3e/18:2)	0.942718	722.504	391.909	6.34109e-06	2.62576e-06	2.57473e-06	3.3335e-06	4.93204e-06	2.61615e-06	5.12498e-06	5.96892e-06	3.88236e-06	3.24621e-06	2.50333e-06	2.11025e-06	3.49186e-06	1.13128e-09	1.94607e-06	2.38846e-06	2.71452e-06	2.72074e-06	3.96385e-06	5.34206e-06	3.3914e-06	1.30829e-09	4.06564e-06	3.16121e-06	2.39124e-06	3.33512e-06	2.99217e-06	1.21998e-09	3.27575e-06	4.05489e-06	4.0011e-06	4.13533e-06	3.73437e-06	4.4105e-06	4.26291e-06	2.98962e-06	1.18155e-09	1.27249e-09	4.14316e-06	2.58193e-06	2.81351e-06	2.81767e-06	4.09592e-06	4.05298e-06	4.69814e-06
227	PE(18:3e/20:4)	0.953798	746.513	423.251	4.57478e-09	0.00137542	0.0014051	0.000845899	0.00110571	0.00157988	0.000859443	0.00121415	0.00185204	0.00156692	0.00138238	0.00169211	0.00128687	0.00169613	0.00137473	0.00127963	0.00188147	0.00143883	0.00137482	0.00141882	0.00133152	0.00209497	0.00155936	0.0018291	0.00168248	0.00130302	0.00146909	0.00193054	0.00170905	0.00170351	0.000915074	0.00189948	0.00173382	0.0014855	0.00184552	0.00162592	0.00215472	0.00182855	0.00190793	0.00128069	0.00166938	0.00168138	0.00139379	0.00146992	0.00150178
798	PE(18:3e/21:2)	0.649843	766.57	473.233	3.85276e-05	0.000219925	0.000213425	6.41898e-06	0.000190916	9.58125e-06	0.000298672	1.1717e-05	1.96496e-05	1.38072e-05	1.54612e-05	2.2112e-05	1.56407e-05	8.75841e-06	0.000143737	8.67184e-06	1.23419e-05	2.32561e-05	0.000144467	9.45802e-06	7.13272e-05	1.04188e-05	1.47328e-05	1.17162e-05	9.18975e-06	0.000244599	1.17903e-05	1.01337e-05	1.21308e-05	0.000198704	1.23722e-05	7.47245e-06	0.000242181	1.25881e-05	0.000246054	7.25855e-06	1.3812e-05	6.87326e-06	1.50698e-05	2.1623e-05	0.000152742	6.30731e-05	1.31634e-05	1.52584e-05	1.01871e-05
601	PE(18:3e/22:4)	0.839708	774.584	409.091	4.57478e-09	2.51343e-05	2.2643e-05	3.10807e-05	2.86168e-05	2.6266e-05	2.87496e-05	2.65411e-05	2.70167e-05	2.60262e-05	2.38008e-05	2.8722e-05	2.68863e-05	2.75934e-05	2.09406e-05	2.85592e-05	3.05885e-05	2.27657e-05	2.81991e-05	2.6458e-05	2.53296e-05	3.10494e-05	2.32374e-05	2.3606e-05	2.80744e-05	2.1265e-05	2.61862e-05	2.51398e-05	2.49698e-05	2.97171e-05	2.06113e-05	2.12427e-05	3.58149e-05	2.23361e-05	1.91089e-05	2.93106e-05	1.18155e-09	3.31312e-05	2.60434e-05	3.63964e-05	2.04711e-05	2.48857e-05	2.41223e-05	2.5268e-05	2.61042e-05
645	PE(18:3e/22:6)	0.80873	770.512	390.39	4.24214e-05	7.63741e-05	9.78987e-05	8.11812e-05	4.93689e-05	8.59607e-05	0.000122942	7.52595e-05	0.0001359	0.000180264	0.000133321	3.94808e-05	4.81075e-05	0.000230252	0.000111163	9.67151e-05	6.27433e-05	5.78954e-05	0.000138759	0.000173452	0.000101973	0.000207328	7.56633e-05	0.000101104	4.23581e-05	5.15828e-05	9.6187e-05	0.000104076	8.42796e-05	6.92799e-05	0.000143317	0.000103571	7.09988e-05	0.000135384	0.000170949	6.94753e-05	1.18155e-09	0.000249381	0.000155945	4.5653e-05	8.07717e-05	0.000102865	0.000116493	0.000115116	0.000134075
805	PE(18:4e/21:0)	0.639123	768.588	505.134	4.57478e-09	0.000470609	0.000446428	0.000330504	0.000438451	0.000396728	0.000498869	0.000431986	0.00043395	0.000431751	0.00050699	0.00035692	0.000431444	0.000382091	0.000620388	0.000443485	0.000406686	0.000531712	0.000446147	0.000460816	0.000423298	0.00049462	0.000543592	0.000465566	0.000406116	0.000367508	0.00039645	0.000420391	0.000411817	0.000326621	0.000485319	0.000366974	0.000397223	0.000461133	0.000435633	0.000388106	0.000473193	0.000481061	0.000619355	0.000370354	0.000546858	0.000442895	0.000419473	0.000426343	0.000412191
824	PE(18:4e/23:0)	0.600833	796.62	504.224	4.57478e-09	0.000309722	0.000429304	0.000367887	0.000470708	0.000487923	0.000562213	0.000427452	0.000439176	0.000524775	0.0004705	0.000391086	0.000383422	0.000435839	0.000404243	0.000414453	0.000431322	0.000446893	0.000458002	0.00051828	0.00041866	0.000560624	0.000422067	1.22256e-09	0.000290915	0.000406304	0.000324824	0.00048471	0.000539393	0.000531075	0.000489925	0.00032249	0.000569895	0.000500687	0.000374532	0.000379555	1.18155e-09	0.00062873	0.000599781	0.0003727	0.000303548	0.000405088	0.000471251	0.000450592	0.000477177
826	PE(18:5e/21:2)	0.598299	762.505	411.753	4.57478e-09	5.81711e-05	6.95443e-05	5.47659e-05	7.02002e-05	7.10775e-05	6.82511e-05	6.73819e-05	5.01268e-05	5.88591e-05	4.68552e-05	6.40291e-05	6.50726e-05	5.29521e-05	6.77833e-05	5.6417e-05	6.9521e-05	6.03112e-05	7.13436e-05	6.19883e-05	5.92328e-05	5.38474e-05	6.7988e-05	5.17038e-05	5.9974e-05	4.91219e-05	6.14965e-05	5.21392e-05	6.45228e-05	6.03087e-05	6.45288e-05	6.00863e-05	7.19578e-05	5.67752e-05	5.45144e-05	5.25713e-05	5.78971e-05	7.03551e-05	5.73935e-05	6.29552e-05	6.88708e-05	5.99504e-05	5.52188e-05	5.44658e-05	5.84538e-05
812	PE(18:5e/23:0)	0.631062	794.604	493.101	0.000305278	0.000316333	0.000566484	0.000240217	0.000261065	0.000294504	0.000440036	0.000438391	0.000527514	0.000447664	0.000486721	0.000395141	0.000328531	0.000351219	0.000337797	0.000328211	0.000297424	0.000360519	0.000381924	0.000514525	0.000380975	0.000575365	0.000279811	0.000461383	0.000198287	0.00036573	0.000269956	0.000338496	0.000236561	0.000336959	0.000402301	0.000295515	0.000358443	0.000496885	0.00039463	0.000201988	0.00049094	0.00033415	0.00057455	0.000309074	0.000274347	0.000359769	0.000346764	0.000367237	0.000361812
849	PE(19:1/20:4)	0.567984	778.561	361.094	7.26407e-06	1.04393e-06	1.65351e-06	5.98156e-07	1.51753e-06	5.8071e-07	1.84017e-06	1.5237e-06	1.20699e-06	1.42793e-06	9.97132e-07	1.7744e-06	6.68592e-07	1.51538e-06	1.62101e-06	1.03017e-06	1.62284e-06	1.39716e-06	1.33927e-06	1.80364e-06	1.62132e-06	1.06573e-06	1.51327e-06	8.72957e-07	1.32898e-06	2.02877e-06	1.11231e-06	1.63029e-06	1.44062e-06	1.00996e-06	1.77296e-06	1.62593e-06	1.73206e-06	1.55937e-06	1.41671e-06	1.40738e-06	1.53289e-06	1.8002e-06	1.55519e-06	2.32031e-06	1.9855e-06	1.53557e-06	1.27303e-06	1.5078e-06	1.65015e-06
835	PE(19:2/20:4)	0.579793	776.534	372.14	1.45934e-05	7.46549e-06	3.99844e-06	6.48832e-06	5.02807e-06	5.64709e-06	5.17432e-06	5.74848e-06	4.77408e-06	4.37535e-06	5.58148e-06	4.49807e-06	5.30157e-06	6.18319e-06	6.28602e-06	7.45603e-06	4.9848e-06	5.74374e-06	4.73916e-06	7.24108e-06	6.06541e-06	9.03022e-06	4.86897e-06	3.35473e-06	5.45081e-06	7.24012e-06	6.76201e-06	4.44847e-06	5.84621e-06	5.41104e-06	3.5084e-06	5.91981e-06	4.2993e-06	6.10659e-06	5.23829e-06	6.17035e-06	7.4811e-06	7.69217e-06	5.22108e-06	8.78408e-06	4.44822e-06	5.8641e-06	5.79354e-06	5.85736e-06	6.11866e-06
867	PE(2:0/19:1)	0.548325	534.319	107.535	1.23524e-05	1.11272e-05	5.49997e-06	8.48712e-06	1.26037e-05	5.92926e-06	5.66689e-06	4.0926e-06	5.59675e-06	2.83064e-06	9.12889e-06	4.79323e-06	4.98603e-06	6.67265e-06	7.14295e-06	7.11785e-06	5.68641e-06	7.49257e-06	4.36861e-06	7.55029e-06	6.9563e-06	1.23784e-05	1.15491e-05	1.01556e-05	1.14758e-05	1.59214e-05	1.41692e-05	9.27482e-06	1.34981e-05	6.46291e-06	1.0833e-05	7.83738e-06	8.28747e-06	1.01553e-05	1.2057e-05	7.69735e-06	1.13365e-05	5.67118e-06	9.08716e-06	5.18291e-06	1.1717e-05	1.02374e-05	8.28417e-06	9.19892e-06	9.09416e-06
215	PE(2:0/21:0)	0.95563	566.372	154.294	1.96738e-07	2.38595e-07	2.99794e-08	3.04121e-07	3.00802e-07	6.46048e-08	4.92634e-08	3.41273e-07	1.39442e-07	1.14706e-08	2.17492e-07	1.16759e-07	1.38505e-07	7.82379e-08	8.37894e-08	2.92799e-07	1.22065e-07	1.47905e-07	6.58262e-08	1.77373e-07	1.55852e-07	1.30829e-09	4.88874e-07	4.61484e-07	7.02078e-08	1.28533e-09	1.46205e-09	1.08176e-07	5.09104e-07	7.37904e-08	1.85933e-07	1.20851e-07	1.75126e-07	2.91515e-07	3.26966e-07	9.95296e-08	2.37961e-07	5.77835e-08	1.95621e-07	9.86698e-08	2.27569e-07	1.86661e-07	2.73074e-07	1.7467e-07	1.12123e-07
847	PE(2:0/21:1)	0.569101	562.351	118.673	7.29166e-06	6.75761e-06	2.42422e-06	5.42138e-06	3.40436e-06	3.98471e-06	3.26614e-06	6.43972e-06	3.97339e-06	1.45538e-06	5.71886e-06	3.71596e-06	4.54866e-06	4.32624e-06	4.70667e-06	4.07295e-06	4.20669e-06	6.01974e-06	2.43161e-06	5.196e-06	4.4681e-06	6.57504e-06	6.81669e-06	5.08124e-06	6.88115e-06	8.81662e-06	5.78661e-06	4.99364e-06	6.53e-06	3.00929e-06	5.87031e-06	4.2364e-06	5.21062e-06	4.60344e-06	5.47282e-06	4.13565e-06	4.76262e-06	2.04354e-06	5.49216e-06	4.14739e-06	6.77842e-06	5.36218e-06	4.61727e-06	5.62622e-06	5.01991e-06
365	PE(20:0/20:4)	0.904445	794.57	504.124	3.8015e-05	2.80504e-05	3.11347e-05	3.14381e-05	2.7397e-05	3.67022e-05	3.50053e-05	2.63212e-05	3.13125e-05	3.18412e-05	3.53394e-05	2.83175e-05	1.42029e-09	3.23251e-05	3.08641e-05	2.70305e-05	3.232e-05	2.77548e-05	3.2486e-05	3.71498e-05	3.00403e-05	3.39706e-05	2.7054e-05	3.5727e-05	2.53771e-05	2.91252e-05	2.66158e-05	3.32541e-05	3.35048e-05	3.48975e-05	3.6239e-05	3.47626e-05	3.58123e-05	3.7736e-05	1.29905e-09	3.09815e-05	1.18155e-09	4.20071e-05	2.84529e-05	2.52902e-05	2.34519e-05	2.87131e-05	3.00613e-05	3.28917e-05	3.22684e-05
868	PE(20:1/20:1)	0.547854	798.599	545.356	1.45428e-05	9.27829e-06	6.3825e-06	8.04518e-06	9.83228e-06	1.38037e-05	2.11792e-05	1.99276e-05	1.46669e-05	1.00835e-05	1.15166e-05	6.68035e-06	5.31487e-06	9.24584e-06	7.90326e-06	1.27075e-09	9.66229e-06	7.07371e-06	8.45211e-06	2.2448e-05	1.0802e-05	1.52156e-05	9.88116e-06	8.4603e-06	1.07264e-05	7.305e-06	2.05798e-05	1.07257e-05	1.36475e-05	8.44143e-06	7.51544e-06	1.0133e-05	1.24196e-05	1.21068e-09	1.68335e-05	1.22994e-05	1.39153e-05	1.76638e-05	8.5878e-06	8.25505e-06	6.27009e-06	1.09438e-05	9.04162e-06	1.07465e-05	8.48246e-06
744	PE(20:1/22:6)	0.729761	816.553	449.327	4.67508e-05	4.10508e-05	2.44054e-05	2.56707e-05	6.16106e-05	2.5452e-05	1.38408e-05	6.52589e-06	7.66618e-06	1.28601e-05	1.70705e-05	7.63019e-06	3.9165e-05	2.30933e-05	8.25938e-06	1.27075e-09	6.05897e-06	1.50377e-09	1.7596e-05	1.08727e-05	1.97791e-05	1.30829e-09	1.63353e-05	2.66659e-05	8.42432e-06	4.83985e-05	5.99746e-05	1.1474e-05	5.98161e-06	1.60057e-05	8.93713e-06	2.01408e-05	1.3516e-05	2.79232e-05	1.92373e-05	3.00793e-05	4.95588e-05	2.82914e-05	3.44809e-05	2.43772e-05	5.94494e-06	2.27874e-05	2.01395e-05	2.41274e-05	2.18834e-05
865	PE(20:2/20:4)	0.551357	790.528	405.144	5.711e-05	8.62492e-05	0.000187849	4.78257e-05	6.00771e-05	7.11628e-05	7.96861e-05	0.000103155	0.000122744	0.000111791	9.53939e-05	9.51216e-05	8.73053e-05	9.4666e-05	1.32527e-09	9.88383e-05	7.42682e-05	5.96504e-05	1.32309e-09	0.000105196	8.19046e-05	0.000109169	9.08338e-05	0.000112275	9.98814e-05	7.29122e-05	6.94344e-05	0.000107306	8.69538e-05	5.72404e-05	0.000128494	9.00696e-05	5.2656e-05	0.000130189	0.000123631	0.000105111	0.000103914	0.00011107	0.000107568	4.99444e-05	8.51185e-05	9.46886e-05	8.98627e-05	9.08298e-05	9.36655e-05
55	PE(20:4/20:4)	0.996377	788.511	330.7	5.19961e-07	2.06236e-06	1.48378e-06	3.84694e-07	1.20361e-06	1.58131e-06	1.09657e-06	3.76072e-06	4.17589e-06	3.70742e-06	8.96774e-07	1.05475e-06	1.55067e-06	1.65325e-06	2.84905e-06	1.63066e-06	1.25682e-06	6.33809e-07	1.72828e-06	1.35782e-06	1.72941e-06	1.9092e-06	3.60255e-06	2.60209e-06	1.67939e-06	1.5633e-06	8.42361e-07	2.89017e-06	2.4069e-06	1.33435e-06	1.21114e-06	3.37123e-06	1.77136e-06	2.27602e-06	4.97349e-06	3.0742e-06	3.21808e-06	3.10425e-06	2.4606e-06	4.0396e-07	2.20683e-06	2.34507e-06	1.50024e-06	2.63456e-06	1.54359e-06
879	PE(20:4/22:5)	0.538365	812.525	378.731	6.97643e-05	8.52915e-05	8.53216e-05	9.73267e-05	7.72758e-05	9.84328e-05	0.000118644	0.000127249	0.000110202	0.000113913	0.000104417	6.74026e-05	0.0001049	0.000128099	7.74994e-05	7.24279e-05	7.58213e-05	6.97182e-05	0.000100158	9.83935e-05	9.41129e-05	0.000106518	0.00010299	0.000110887	8.61096e-05	8.75943e-05	7.09385e-05	0.000100442	0.000101896	0.000106326	0.00010506	0.000114433	0.000101488	0.000126758	1.29905e-09	7.58895e-05	0.000152513	9.90065e-05	9.53116e-05	7.39041e-05	5.98143e-05	9.3894e-05	8.67418e-05	9.12336e-05	9.09209e-05
74	PE(20:4/22:6)	0.991875	812.521	353.56	2.99952e-05	7.92055e-05	7.35407e-05	4.13634e-05	5.8765e-05	8.26419e-05	9.97031e-05	0.00012287	0.000146802	0.000132134	0.000111528	7.54693e-05	6.39841e-05	0.000113408	7.58848e-05	6.73225e-05	8.02413e-05	5.37403e-05	8.2976e-05	0.000146947	8.69261e-05	8.51874e-05	9.97429e-05	0.000136137	7.19174e-05	5.07488e-05	7.20996e-05	0.000117325	0.000103381	7.90619e-05	0.000129908	0.000119533	8.18995e-05	1.21068e-09	0.000147067	8.59143e-05	0.000183946	0.000179117	7.97306e-05	3.78905e-05	7.48805e-05	9.67744e-05	0.000101817	0.000100222	0.000100986
383	PE(20:4e/20:4)	0.898528	772.518	390.49	5.15615e-06	1.05145e-05	1.3899e-05	1.02172e-05	7.15842e-06	1.12681e-05	1.67694e-05	1.03351e-05	1.83992e-05	2.43606e-05	1.81803e-05	5.17572e-06	6.44763e-06	1.13128e-09	1.54338e-05	1.33453e-05	8.54664e-06	8.23825e-06	1.82341e-05	2.39851e-05	1.22833e-05	2.91522e-05	1.03451e-05	1.4163e-05	5.66108e-06	7.43615e-06	1.36487e-05	1.41917e-05	1.15776e-05	9.86009e-06	1.91127e-05	1.42042e-05	9.46053e-06	1.82072e-05	2.37096e-05	9.62123e-06	1.18155e-09	3.38735e-05	2.07095e-05	6.26245e-06	1.05297e-05	1.40864e-05	1.66502e-05	1.57881e-05	1.78032e-05
873	PE(20:4e/21:2)	0.541771	792.589	437.671	0.000254194	0.000189489	0.000147143	6.14652e-05	0.000134423	0.000195983	0.00028032	0.00015248	0.000384696	0.00026727	0.000308557	0.000365905	6.54833e-05	0.000264775	7.1314e-05	0.000193836	0.000137608	0.000118716	0.000302837	7.92619e-05	0.000198788	0.000326266	0.000236106	1.22256e-09	4.51239e-05	0.000237758	0.000205899	0.000157838	0.000286763	0.000140697	0.000101487	0.000234291	0.000200062	0.000379748	0.000313617	0.000273879	0.000468532	0.000323494	0.000428316	0.00024787	0.000293897	0.000245082	0.000294375	0.000277869	0.000273841
628	PE(22:2/18:5)	0.823194	790.559	452.756	0.000462698	0.000223893	0.00022999	0.000204237	0.000307933	0.000260662	0.000320177	0.000237105	0.000198769	0.000238224	0.000323355	0.000251902	0.000271453	0.000162768	0.00031691	0.000194796	0.000224863	0.000318945	0.000295919	0.000207989	0.000262629	0.000267406	0.000254455	1.22256e-09	0.000236171	0.000230955	0.00021646	0.000163766	0.000281691	0.000214045	0.000197728	0.000226936	0.000313415	0.00024216	0.000219354	0.000319267	0.000286795	0.000203142	0.000168353	0.000251459	0.000316337	0.000230495	0.000206045	0.000193733	0.000173667
836	PE(22:2/20:3)	0.578746	820.537	482.427	4.57478e-09	4.27513e-05	4.68017e-05	3.69825e-05	5.24709e-05	5.81845e-05	6.18477e-05	5.25494e-05	4.8563e-05	4.70089e-05	3.81807e-05	6.80677e-05	5.74685e-05	3.75967e-05	4.92044e-05	4.08284e-05	1.42618e-09	5.91463e-05	4.73702e-05	5.09819e-05	4.48005e-05	5.2349e-05	5.10242e-05	5.81495e-05	4.02447e-05	4.91029e-05	4.95806e-05	4.81252e-05	4.201e-05	6.38273e-05	5.24305e-05	5.07104e-05	5.41758e-05	5.08329e-05	4.26958e-05	4.63924e-05	3.79083e-05	6.22678e-05	5.16624e-05	6.08548e-05	4.85272e-05	5.06436e-05	3.77191e-05	4.64222e-05	4.55613e-05
345	PE(22:3e/20:4)	0.913532	802.576	489.424	4.57478e-09	1.86347e-05	2.48424e-05	3.53837e-05	2.05889e-05	3.09119e-05	2.34418e-05	2.35844e-05	3.38727e-05	2.30913e-05	2.20945e-05	2.43523e-05	1.84169e-05	2.84393e-05	2.03144e-05	2.42344e-05	1.81007e-05	2.10308e-05	2.98832e-05	2.84659e-05	2.34844e-05	3.91631e-05	1.78122e-05	2.42685e-05	2.65339e-05	2.88026e-05	2.85412e-05	3.43406e-05	2.83058e-05	3.18866e-05	2.99501e-05	2.83817e-05	2.61055e-05	3.03098e-05	1.77756e-05	2.04772e-05	3.23971e-05	3.92044e-05	2.8558e-05	2.7397e-05	3.24284e-05	2.8632e-05	2.28502e-05	2.58238e-05	2.60864e-05
913	PE(22:5/22:5)	0.405701	840.572	416.984	0.000200028	0.000118686	0.000130957	0.000105333	0.000106123	9.64639e-05	0.000169462	8.7421e-05	0.000112072	0.000162185	0.000173026	0.000108114	0.000154682	8.22663e-05	0.000163828	5.68706e-05	0.000215667	8.68443e-05	0.000111162	0.000114249	0.000127772	0.000150634	0.000128742	0.000161798	7.39621e-05	0.00015347	6.31021e-05	8.35454e-05	0.000124821	0.000182109	0.000181649	6.81e-05	0.000191428	0.000148467	0.000180824	5.4657e-05	8.23966e-05	7.69421e-05	0.000136602	0.000101905	6.92017e-05	0.000120718	0.000141712	7.29526e-05	0.000138449
108	PE(22:5/22:6)	0.982612	838.559	396.859	9.67305e-05	3.96459e-05	0.000173836	0.000145527	6.41079e-05	0.000138211	0.000199933	0.000145001	0.000212949	0.000134939	0.000162116	8.40988e-05	9.08647e-05	3.39699e-05	8.19939e-05	9.63418e-05	8.95685e-05	5.31122e-05	0.000177199	0.000146017	0.000118308	7.72682e-05	0.000104119	0.00012069	0.000191182	0.000207753	0.00010293	0.00022706	0.000218239	0.000233427	7.13246e-05	6.42711e-05	0.000171498	0.000153003	6.77602e-05	0.000196314	7.43904e-05	0.000268764	4.22592e-05	0.00014205	0.000176816	0.000145556	0.000136245	0.000221179	0.000217683
659	PE(22:5e/16:0)	0.798454	750.529	398.643	4.57478e-09	5.92802e-05	5.85065e-05	6.3814e-05	5.44734e-05	5.79557e-05	5.37484e-05	5.31257e-05	5.16349e-05	4.7277e-05	5.83455e-05	4.74344e-05	4.91134e-05	5.10857e-05	5.10906e-05	5.22047e-05	5.26543e-05	5.92179e-05	5.02801e-05	5.33038e-05	5.12275e-05	6.68984e-05	5.34935e-05	5.36753e-05	5.41496e-05	5.28716e-05	5.91541e-05	5.18616e-05	5.48466e-05	5.64158e-05	5.32865e-05	5.00149e-05	4.6529e-05	5.14694e-05	5.56721e-05	5.30792e-05	5.94349e-05	5.72749e-05	5.16754e-05	5.35764e-05	4.92047e-05	5.42292e-05	4.71527e-05	5.18202e-05	5.16046e-05
319	PE(22:5e/18:2)	0.927892	774.531	371.889	0.00011823	9.59742e-05	2.19231e-05	4.26585e-05	3.04177e-05	4.64658e-05	7.4422e-05	3.58016e-05	2.58915e-05	4.85533e-05	3.72038e-05	2.98429e-05	6.38865e-05	8.61841e-05	8.14395e-05	8.35082e-05	3.07599e-05	5.85219e-05	3.29614e-05	3.27867e-05	5.38716e-05	0.00010059	3.36986e-05	4.0925e-05	4.62342e-05	9.42514e-05	7.03697e-05	2.41367e-05	6.0195e-05	3.79689e-05	5.26645e-05	4.05608e-05	3.23532e-05	2.46494e-05	3.07843e-05	7.21551e-05	0.00011517	0.000104392	7.42082e-05	7.24513e-05	5.04688e-05	5.89114e-05	3.37442e-05	8.16139e-05	3.52737e-05
594	PE(22:5e/20:4)	0.844438	798.563	392.51	8.51563e-07	4.20437e-06	1.03141e-06	1.28133e-09	2.69581e-06	2.62979e-06	2.47233e-06	3.55152e-06	2.13312e-06	1.19668e-06	3.94637e-06	1.49093e-06	2.76005e-06	2.13965e-06	2.75158e-06	3.65758e-06	6.50649e-06	2.04375e-06	1.31765e-06	3.574e-06	2.5478e-06	4.17722e-06	2.76874e-06	2.51853e-06	2.19611e-06	4.07834e-06	2.21825e-06	1.78139e-06	3.93907e-06	9.80085e-07	3.09643e-06	1.78668e-06	2.68814e-06	2.51497e-06	3.40908e-06	1.16239e-06	3.32621e-06	1.93089e-06	2.36089e-06	1.38631e-06	2.07412e-06	2.51969e-06	2.66459e-06	2.62678e-06	2.92861e-06
878	PE(22:5e/21:2)	0.538857	818.565	489.455	5.55062e-05	3.64844e-05	4.65916e-05	4.1389e-05	2.5538e-05	4.1456e-05	3.7114e-05	4.10249e-05	2.73796e-05	3.51622e-05	3.16046e-05	2.7252e-05	3.82805e-05	4.23164e-05	3.76585e-05	2.4823e-05	4.59127e-05	4.07882e-05	3.9537e-05	3.41911e-05	3.75005e-05	3.07866e-05	2.3154e-05	2.94803e-05	3.1274e-05	4.53199e-05	2.58552e-05	4.15131e-05	3.43453e-05	4.87518e-05	4.43895e-05	3.53309e-05	4.52714e-05	3.81573e-05	5.01706e-05	3.23571e-05	3.72627e-05	3.94199e-05	3.43806e-05	3.60643e-05	2.45522e-05	3.63918e-05	3.07516e-05	3.35409e-05	3.5814e-05
62	PE(22:6/22:6)	0.995878	836.517	340.417	9.80925e-07	4.52454e-06	4.32917e-06	1.02696e-06	3.81241e-06	4.31074e-06	6.51741e-06	8.77217e-06	1.06749e-05	9.48938e-06	6.85028e-06	6.01732e-06	3.91011e-06	1.03399e-05	9.3678e-06	6.03284e-06	5.64379e-06	3.31569e-06	6.93e-06	9.52335e-06	6.11849e-06	4.45933e-06	7.58113e-06	1.56799e-05	5.02233e-06	4.37335e-06	6.02575e-06	7.13922e-06	9.0034e-06	4.15464e-06	1.11716e-05	9.02669e-06	4.79537e-06	1.86086e-05	1.49678e-05	1.4781e-05	1.34119e-05	1.76181e-05	1.40939e-05	1.66791e-06	6.59597e-06	9.50889e-06	1.01276e-05	7.30591e-06	1.11338e-05
81	PE(24:4/18:5)	0.991327	814.537	378.549	4.57478e-09	0.000202797	0.000189488	0.000191662	0.000151724	0.000206218	0.000241235	0.000271268	0.000254145	0.000257909	0.000245659	0.000189238	0.000262997	0.000314249	0.000207391	0.000134802	0.000191086	0.000133872	0.00017803	0.000222694	0.000202323	0.000230664	0.000240595	0.000266592	0.000201042	0.000157429	0.000121898	0.0002277	0.000249963	0.000179257	0.000242369	0.000207287	0.000260642	0.000318368	1.29905e-09	0.000182633	0.000252712	0.00023806	0.000211147	0.000118984	0.000152578	0.000202996	0.000205293	0.000199748	0.000210985
111	PE(3:0/20:4)	0.982612	558.377	100.148	4.15532e-05	1.01363e-05	1.2587e-05	8.82912e-06	1.13776e-05	1.00302e-05	1.0675e-05	7.62144e-06	6.44939e-06	9.38067e-06	7.72092e-06	1.56828e-05	8.95655e-06	8.19417e-06	1.18183e-05	1.27075e-09	8.87557e-06	9.91708e-06	1.22223e-05	1.17511e-09	1.06015e-05	1.13169e-05	1.40393e-09	1.33137e-05	1.22869e-05	1.07149e-05	1.2122e-05	9.5625e-06	1.23706e-05	1.08225e-05	1.1197e-05	1.12276e-05	1.0374e-05	9.79211e-06	9.813e-06	1.35465e-05	8.68474e-06	1.1165e-05	1.02441e-05	1.53074e-05	1.32969e-09	1.01932e-05	1.30706e-05	9.5887e-06	9.58736e-06
869	PE(5:0/15:1)	0.54754	520.304	102.261	1.21823e-05	1.09331e-05	4.621e-06	6.28934e-06	9.87507e-06	6.59273e-06	5.19802e-06	8.14147e-06	6.23651e-06	2.70006e-06	9.61779e-06	5.1106e-06	6.41872e-06	6.30305e-06	6.85561e-06	7.60511e-06	6.94089e-06	7.61817e-06	3.61935e-06	7.61058e-06	7.02347e-06	1.32285e-05	1.20338e-05	1.06508e-05	1.11192e-05	1.14367e-05	1.27268e-05	7.32073e-06	1.28231e-05	5.00743e-06	9.00277e-06	7.25581e-06	8.43767e-06	8.1831e-06	1.2983e-05	7.9588e-06	9.76408e-06	3.4374e-06	1.11443e-05	5.8222e-06	1.03489e-05	9.53425e-06	7.47474e-06	8.30549e-06	8.43723e-06
112	PE(5:0/16:4)	0.982612	530.287	78.0228	0.000137747	3.88757e-05	5.20545e-05	6.02502e-05	6.75629e-05	5.54493e-05	8.60233e-05	4.42266e-05	4.31714e-05	4.43711e-05	4.83394e-05	5.24035e-05	5.45311e-05	5.33497e-05	5.648e-05	7.1973e-05	4.42342e-05	6.84096e-05	4.26653e-05	7.99709e-05	6.01044e-05	4.99731e-05	3.08035e-05	4.45085e-05	2.69201e-05	3.14809e-05	4.61134e-05	2.72712e-05	6.47317e-05	2.49149e-05	3.37688e-05	2.74958e-05	3.37929e-05	3.42541e-05	3.09624e-05	5.86614e-05	3.6518e-05	2.216e-05	3.37691e-05	8.46982e-05	6.50309e-05	4.03914e-05	5.61435e-05	5.4205e-05	5.28819e-05
841	PE(6:0/17:1)	0.574925	562.351	154.91	1.37108e-05	9.2091e-06	4.25507e-06	9.50599e-06	1.28821e-05	6.65371e-06	5.17645e-06	9.07878e-06	6.39424e-06	2.79413e-06	8.85351e-06	5.14178e-06	5.51934e-06	5.7126e-06	6.59562e-06	9.02333e-06	5.01856e-06	7.10928e-06	3.76506e-06	9.09454e-06	7.2747e-06	1.34362e-05	1.13499e-05	1.10778e-05	8.05174e-06	1.57993e-05	1.35686e-05	6.05002e-06	1.07005e-05	5.32855e-06	9.27599e-06	6.82902e-06	8.4193e-06	1.04293e-05	1.10908e-05	7.17094e-06	8.49217e-06	4.54884e-06	9.94224e-06	5.95207e-06	8.71105e-06	9.31122e-06	7.58932e-06	8.50104e-06	8.2093e-06
79	PE(8:0/26:2)	0.991435	716.578	381.322	3.69577e-05	1.59297e-05	9.75593e-06	1.61336e-05	2.18443e-05	1.5131e-05	1.18308e-05	1.56269e-05	1.44086e-05	1.05883e-05	1.56237e-05	1.2179e-05	1.47689e-05	5.61538e-06	9.02601e-06	1.63511e-05	1.54405e-05	1.25155e-05	1.5602e-05	1.22927e-05	1.48811e-05	2.24959e-05	9.78308e-06	2.03985e-05	1.16342e-05	1.28533e-09	1.46521e-05	1.00586e-05	1.23254e-05	1.44311e-05	1.53089e-05	1.05299e-05	1.9126e-05	1.56983e-05	1.33695e-05	1.20132e-05	1.18155e-09	1.10609e-05	1.35699e-05	2.0007e-05	7.48466e-06	1.26975e-05	1.49613e-05	1.30992e-05	1.42225e-05
777	PEtOH(16:0/20:4)	0.682026	723.497	350.233	3.64847e-06	5.82832e-06	7.71573e-06	7.59173e-06	3.32618e-06	1.3002e-06	1.30837e-09	6.01507e-06	8.36523e-06	1.56138e-06	1.1188e-06	3.97691e-06	2.91793e-06	1.19851e-06	4.51695e-06	3.41382e-06	1.63528e-06	1.35534e-06	1.22244e-06	3.69179e-06	3.52007e-06	8.7061e-06	6.78508e-06	9.65128e-06	8.76681e-06	1.28533e-09	8.66334e-06	4.05321e-06	5.0037e-06	1.20569e-06	3.74677e-06	5.7535e-06	5.95142e-06	6.661e-06	1.47878e-05	8.05585e-06	5.80109e-06	4.17738e-07	2.98305e-06	3.51401e-06	8.95742e-07	5.57023e-06	5.17942e-06	6.0657e-06	6.37075e-06
695	PEtOH(19:0/22:4)	0.759471	793.595	524.638	4.72246e-06	4.06193e-06	3.99289e-06	3.05652e-06	3.5087e-06	5.68089e-06	2.01457e-06	2.74754e-06	3.97541e-06	4.12152e-06	4.3657e-06	4.70986e-06	3.1055e-06	3.72201e-06	3.62961e-06	2.48578e-06	4.78099e-06	3.523e-06	5.2574e-06	3.59057e-06	3.85264e-06	1.30829e-09	3.6275e-06	3.8644e-06	4.52974e-06	4.53555e-06	4.93258e-06	3.14032e-06	4.42948e-06	3.36409e-06	4.36437e-06	3.23403e-06	4.77046e-06	4.03005e-06	2.87751e-06	3.81431e-06	1.18155e-09	5.9211e-06	4.36217e-06	4.42907e-06	3.09006e-06	3.66596e-06	2.37878e-06	2.99936e-06	4.46276e-06
767	PEtOH(19:1/20:3)	0.697536	765.569	453.734	2.80493e-06	1.21586e-06	8.33224e-07	1.75329e-06	1.03865e-06	1.94347e-06	1.33094e-06	6.75452e-07	1.43827e-06	1.4511e-06	6.75463e-07	6.62155e-07	2.2875e-07	1.29732e-06	1.13153e-06	7.68459e-07	1.28859e-06	7.22647e-07	1.27016e-06	8.58255e-07	1.16943e-06	1.7449e-06	1.25817e-06	8.13585e-07	1.82991e-06	1.33843e-06	2.26772e-06	7.79189e-07	1.33399e-06	1.4941e-06	7.37934e-07	1.06393e-06	9.95547e-07	5.82273e-07	6.17721e-07	9.36674e-07	2.03946e-06	1.35658e-06	9.87953e-07	1.48778e-06	6.18839e-07	1.21423e-06	7.57304e-07	1.01812e-06	1.0926e-06
110	PG(14:0/22:3)	0.982612	790.558	332.959	5.32814e-06	5.71506e-06	8.92157e-06	6.11756e-06	8.37739e-06	7.76441e-06	3.56748e-06	4.43621e-06	6.90828e-06	6.89947e-06	3.06275e-06	1.00849e-05	4.36837e-06	5.60953e-06	5.77981e-06	1.11535e-05	4.45337e-06	3.78356e-06	3.53218e-06	6.97889e-06	6.14212e-06	1.18695e-05	9.67556e-06	4.08643e-06	7.42754e-06	5.38998e-06	6.23942e-06	6.47827e-06	1.19335e-09	1.26235e-05	9.55508e-06	6.70231e-06	8.8457e-06	1.21068e-09	6.9075e-06	6.05809e-06	1.15426e-05	1.23128e-05	4.94073e-06	4.87482e-06	5.45958e-06	7.04959e-06	5.65347e-06	6.10671e-06	9.826e-06
146	PG(16:0/16:0)	0.975206	721.491	311.101	2.98283e-08	1.60739e-07	2.45658e-08	2.22126e-07	1.29504e-07	6.00767e-08	1.59666e-07	9.18962e-08	1.18992e-09	8.12667e-08	1.09021e-07	4.14585e-08	6.92652e-08	4.17448e-08	1.03554e-07	2.21582e-07	6.85424e-08	9.87283e-08	2.50981e-08	1.17511e-09	8.70514e-08	2.2336e-07	6.76032e-08	8.08508e-08	1.37802e-07	1.28533e-09	1.08507e-07	6.45706e-08	1.25072e-07	6.89119e-08	1.34515e-07	1.15014e-07	6.2476e-08	1.93057e-07	1.02407e-07	7.88328e-08	6.25202e-08	3.91167e-08	1.04606e-07	3.41949e-08	8.56016e-08	9.45153e-08	1.46239e-07	1.18527e-07	9.92696e-08
86	PG(16:0/18:1)	0.990235	766.558	356.757	4.57478e-09	0.000100668	6.42817e-05	0.000111502	0.000105257	0.000102382	8.20168e-05	9.66201e-05	0.000153902	0.000108589	8.51415e-05	6.72348e-05	8.31761e-05	9.51582e-05	9.21378e-05	0.000111691	8.24259e-05	7.85206e-05	9.48751e-05	0.000164024	9.39805e-05	0.000175518	9.59461e-05	0.000135087	0.000129604	0.000119326	0.00011157	0.000142448	0.000156317	9.49661e-05	0.000120617	0.000127891	7.78083e-05	0.000149986	8.79878e-05	9.84319e-05	0.000120982	0.000132743	9.70653e-05	5.29265e-05	9.00653e-05	0.000115864	0.000115276	0.0001052	0.000106256
303	PG(16:0/18:2)	0.936796	745.504	293.149	4.21578e-06	5.63844e-06	3.07897e-06	1.28133e-09	6.51601e-06	3.70908e-06	3.51172e-06	2.57986e-06	2.14989e-06	4.15895e-06	3.84746e-06	1.69538e-06	2.54145e-06	2.24395e-06	3.1428e-06	4.03575e-06	2.57255e-06	4.36534e-06	3.24678e-06	4.78269e-06	3.40171e-06	5.87064e-06	3.34611e-06	3.12453e-06	3.75297e-06	3.51777e-06	2.78478e-06	3.41545e-06	1.19335e-09	2.96342e-06	3.75682e-06	4.01028e-06	3.26459e-06	2.14957e-06	1.29905e-09	2.62653e-06	3.19835e-06	4.47866e-06	3.08205e-06	2.48593e-06	2.26597e-06	3.00485e-06	3.04874e-06	3.51688e-06	3.58858e-06
80	PG(16:0/20:2)	0.991379	792.563	327.766	1.79409e-06	1.51572e-07	3.79885e-07	5.95299e-07	2.70818e-07	2.12553e-07	4.26686e-07	4.64298e-07	1.18992e-09	4.44003e-07	1.47568e-07	4.02054e-07	2.03993e-07	6.19529e-07	3.9638e-07	6.45981e-07	2.46042e-07	2.6901e-07	4.75644e-07	1.17511e-09	4.07388e-07	5.28785e-07	2.619e-07	3.05617e-07	2.43148e-07	1.0167e-06	4.43216e-07	5.84173e-07	2.07399e-07	5.17933e-07	5.87546e-07	3.07706e-07	3.10343e-07	8.59117e-07	6.20122e-07	2.18802e-07	4.9201e-07	5.02785e-07	4.54151e-07	3.57524e-07	4.81722e-07	4.65035e-07	3.78157e-07	2.37425e-07	4.93578e-07
625	PG(16:0/20:3)	0.824959	771.537	364.193	2.98647e-06	1.02864e-06	1.03998e-06	1.77118e-06	9.86962e-07	1.23978e-06	1.37463e-06	8.34686e-07	5.90619e-07	1.48018e-06	1.244e-06	1.8888e-06	1.1796e-06	1.11892e-06	6.94864e-07	1.27075e-09	9.47138e-07	9.82115e-07	1.97416e-06	9.2054e-07	1.21423e-06	1.22343e-06	8.43317e-07	4.64887e-07	4.75352e-07	7.07263e-07	1.36735e-06	5.74012e-07	8.09676e-07	1.34107e-09	5.06093e-07	9.50693e-07	8.92287e-07	6.02971e-07	4.5302e-07	9.0985e-07	1.62262e-06	1.92499e-06	9.96035e-07	2.50496e-06	7.54052e-07	9.2921e-07	1.16441e-06	8.37156e-07	1.19087e-06
732	PG(16:0/20:4)	0.745525	769.521	331.584	9.69203e-07	6.52102e-07	1.35745e-07	5.64063e-07	3.81947e-07	2.04121e-07	8.69171e-08	3.50722e-07	1.79997e-07	1.04076e-07	1.228e-09	7.68573e-08	4.9752e-07	1.88844e-07	3.55539e-07	1.27075e-09	1.69146e-07	1.96838e-07	1.64512e-07	5.04303e-07	2.89248e-07	3.15982e-07	3.49778e-07	2.99986e-07	2.47515e-07	3.12741e-07	4.31246e-07	8.33388e-08	4.40901e-07	6.49599e-08	5.8323e-08	3.75143e-08	9.94896e-08	3.82507e-08	2.44808e-07	3.06081e-07	1.40842e-07	5.36607e-08	2.88692e-07	2.91933e-07	3.72281e-07	2.23916e-07	2.72781e-07	2.64529e-07	2.91699e-07
83	PG(17:1/17:1)	0.990515	764.544	323.38	2.52392e-06	3.05837e-06	3.36012e-06	3.56298e-06	3.43091e-06	3.66853e-06	3.90264e-06	3.36105e-06	5.65102e-06	4.93919e-06	2.45081e-06	2.68886e-06	2.2355e-06	4.02401e-06	3.15833e-06	4.55144e-06	4.02806e-06	2.08698e-06	4.25894e-06	6.08488e-06	3.65133e-06	7.61789e-06	3.21709e-06	3.6108e-06	4.1368e-06	3.51196e-06	4.95703e-06	6.31193e-06	5.10935e-06	4.77627e-06	4.49204e-06	4.98699e-06	3.24045e-06	5.17507e-06	3.46248e-06	2.85916e-06	1.18155e-09	1.27249e-09	3.13904e-06	2.01172e-06	3.08106e-06	3.78498e-06	4.07884e-06	3.83994e-06	4.59815e-06
658	PG(18:0/18:1)	0.798907	775.586	408.945	1.2008e-05	4.95598e-06	4.79738e-06	7.66887e-06	5.88436e-06	5.99193e-06	6.53365e-06	5.64024e-06	6.04598e-06	6.10894e-06	6.18104e-06	6.49269e-06	5.87799e-06	6.63486e-06	5.303e-06	6.63924e-06	7.02665e-06	4.98633e-06	6.61913e-06	5.46621e-06	6.34313e-06	6.97912e-06	5.69114e-06	5.22374e-06	6.65228e-06	4.60701e-06	6.21721e-06	6.17782e-06	5.07997e-06	6.83148e-06	4.67139e-06	4.62913e-06	9.4589e-06	5.41901e-06	4.21284e-06	6.72133e-06	1.18155e-09	7.17292e-06	5.85515e-06	8.42868e-06	4.22361e-06	5.71269e-06	5.16905e-06	6.02189e-06	5.2715e-06
655	PG(18:1/20:4)	0.8002	795.516	294.84	8.7878e-06	5.7087e-06	9.55684e-06	1.02592e-05	6.13773e-06	6.37722e-06	6.19473e-06	4.97247e-06	6.26576e-06	4.9897e-06	7.18007e-06	4.83146e-06	6.18189e-06	3.55784e-06	5.32795e-06	6.71688e-06	4.9672e-06	6.54051e-06	6.30291e-06	1.17511e-09	6.0429e-06	6.04785e-06	5.66644e-06	5.93956e-06	5.59091e-06	8.65426e-06	3.75911e-06	6.46742e-06	4.41936e-06	5.51602e-06	6.85691e-06	6.10595e-06	5.41314e-06	6.65058e-06	4.21376e-06	3.40674e-06	7.87595e-06	3.78266e-06	3.89542e-06	4.82817e-06	3.99589e-06	5.45431e-06	5.24744e-06	5.77511e-06	5.58469e-06
883	PG(18:1/22:2)	0.534837	827.562	452.072	0.000185264	9.47717e-05	1.46536e-09	0.000129311	0.000117146	1.35098e-09	0.000130787	9.9399e-05	1.18992e-09	0.000102572	9.08353e-05	0.000144288	0.00010388	9.055e-05	9.47295e-05	9.54329e-05	1.42618e-09	0.000110687	9.51573e-05	1.17511e-09	8.4241e-05	9.29303e-05	0.000111232	0.000109797	0.000126964	1.28533e-09	9.91219e-05	0.000137622	0.000114758	1.34107e-09	0.000107264	0.000116238	0.000120125	0.000125575	9.08559e-05	9.91747e-05	9.06834e-05	1.27249e-09	8.66831e-05	1.81728e-09	0.000115612	8.7232e-05	8.75027e-05	9.63376e-05	0.000119796
61	PG(18:2/18:2)	0.996014	788.542	291.86	7.94033e-06	6.76027e-06	7.3674e-06	8.05504e-06	8.133e-06	6.92297e-06	6.61022e-06	9.55968e-06	1.08133e-05	1.07385e-05	8.40365e-06	1.13922e-05	7.25195e-06	1.1564e-05	9.11162e-06	9.81663e-06	6.96789e-06	7.51937e-06	9.24052e-06	1.34997e-05	8.88342e-06	9.48106e-06	7.19849e-06	6.56082e-06	5.34034e-06	1.04979e-05	8.68467e-06	8.24472e-06	6.40751e-06	8.58968e-06	7.44256e-06	7.46751e-06	6.19069e-06	9.24942e-06	6.11675e-06	5.5872e-06	1.11738e-05	1.12093e-05	1.17162e-05	9.97737e-06	1.12166e-05	8.41763e-06	8.47082e-06	8.0496e-06	8.92153e-06
311	PG(18:2/20:3)	0.9333	795.508	257.312	2.54165e-06	2.9513e-06	2.88699e-06	2.52614e-06	2.52652e-06	3.10093e-06	1.60515e-06	2.04804e-06	1.92944e-06	1.43179e-06	3.2691e-06	8.02324e-07	1.2382e-06	1.55655e-06	2.28156e-06	1.83746e-06	1.57257e-06	1.48077e-06	1.38641e-06	1.17511e-09	1.9487e-06	1.27513e-06	1.65458e-06	2.0784e-06	9.64858e-07	1.86124e-06	1.01509e-06	1.35642e-06	2.80099e-06	1.38265e-06	1.53706e-06	1.49284e-06	2.23982e-06	2.10468e-06	1.46881e-06	2.15542e-06	2.27212e-06	1.32984e-06	1.14017e-06	1.0381e-06	9.89629e-07	1.60789e-06	1.62633e-06	1.64006e-06	2.40457e-06
373	PG(18:2/20:4)	0.901851	793.493	240.478	2.0601e-07	1.15564e-06	1.22529e-06	5.8102e-08	6.89004e-08	9.5744e-08	6.87884e-07	2.78971e-08	8.37176e-07	7.31148e-08	1.53522e-07	5.647e-08	4.02149e-08	5.99579e-08	5.4097e-08	1.33739e-07	5.68792e-08	7.87045e-08	4.98299e-07	1.17511e-09	2.78441e-07	8.98424e-08	1.03483e-07	3.67322e-08	5.85981e-08	7.16113e-08	1.02294e-07	8.91937e-07	7.05916e-07	6.44632e-07	4.57371e-08	2.77363e-08	8.15395e-07	1.37055e-07	1.901e-07	1.14081e-07	2.5172e-07	8.06894e-07	5.17051e-07	3.05914e-08	1.80397e-07	2.9109e-07	6.96429e-08	9.91623e-08	7.59213e-08
720	PI(10:0/26:4)	0.749283	857.516	275.9	6.63992e-06	4.6826e-06	5.85668e-06	6.19157e-06	3.71383e-07	1.06252e-05	1.08266e-05	5.31012e-07	3.24785e-06	5.31306e-06	3.46442e-06	4.63648e-08	2.59175e-07	5.87334e-06	3.69447e-06	5.28054e-06	3.24728e-06	2.23954e-07	3.93006e-06	7.42737e-06	4.38664e-06	5.82907e-06	3.67435e-06	3.34033e-06	7.16537e-06	1.34989e-06	5.23316e-06	1.13527e-05	4.74718e-07	1.37993e-05	5.61665e-06	8.01977e-06	7.95762e-06	1.21068e-09	1.05428e-05	9.20752e-06	1.18155e-09	1.27249e-09	3.35457e-06	2.44781e-06	2.79559e-06	5.10825e-06	6.08204e-06	6.96206e-06	6.50829e-06
693	PI(14:0/22:3)	0.760943	859.556	273.052	1.46933e-05	1.36417e-05	9.34444e-07	1.33509e-05	9.53707e-06	1.18132e-05	1.82407e-06	1.13656e-05	4.07861e-06	5.36407e-07	8.07602e-06	4.50646e-06	8.62644e-06	3.18313e-06	7.32584e-06	8.82207e-06	8.97019e-06	6.79005e-06	1.25426e-06	7.49006e-06	7.34099e-06	6.46693e-06	8.74201e-06	7.26062e-06	2.87325e-06	9.45745e-06	7.35526e-06	1.32365e-06	1.08776e-05	1.10931e-06	3.68049e-06	2.77663e-06	5.3878e-06	4.8238e-06	5.88443e-06	6.58124e-06	1.83053e-06	3.7929e-07	4.30529e-06	5.23205e-06	4.8729e-06	5.06103e-06	5.00187e-06	5.64484e-06	5.81147e-06
760	PI(15:0/16:0)	0.710217	795.515	306.697	4.57478e-09	4.44977e-06	5.10206e-06	4.59776e-06	4.69982e-06	3.23024e-06	5.44711e-06	5.02375e-06	7.1343e-06	5.48608e-06	4.17218e-06	6.6188e-06	6.37996e-06	1.13128e-09	5.25005e-06	4.50995e-06	5.72781e-06	4.34092e-06	4.9059e-06	1.17511e-09	4.35417e-06	4.5319e-06	5.2465e-06	4.38447e-06	4.62655e-06	6.2612e-06	3.57841e-06	1.21998e-09	4.2177e-06	5.49215e-06	4.85976e-06	4.78313e-06	6.16023e-06	5.91268e-06	5.60792e-06	3.2158e-06	5.97333e-06	1.27249e-09	1.27449e-09	4.49489e-06	1.32969e-09	3.96759e-06	5.55156e-06	5.36461e-06	5.37582e-06
632	PI(16:0/16:0)	0.818839	809.518	337.234	2.40074e-05	2.53593e-05	2.20636e-05	3.45304e-05	2.37011e-05	2.87036e-05	3.54239e-05	2.21787e-05	3.1713e-05	2.5326e-05	2.47704e-05	2.08511e-05	2.05511e-05	2.94876e-05	2.42405e-05	3.70849e-05	2.31154e-05	1.83136e-05	2.46066e-05	4.0112e-05	2.6807e-05	3.09465e-05	2.51739e-05	4.52699e-05	2.19259e-05	2.67061e-05	2.09253e-05	3.26687e-05	2.74876e-05	2.77746e-05	3.02628e-05	3.5508e-05	2.39388e-05	1.21068e-09	2.36261e-05	2.48722e-05	3.96473e-05	4.8736e-05	2.60409e-05	1.86415e-05	1.74623e-05	2.73808e-05	2.78353e-05	2.91038e-05	3.08082e-05
801	PI(16:0/16:1)	0.643396	807.491	436.313	4.78607e-05	2.14187e-05	3.23384e-05	2.25447e-05	2.52465e-05	2.71494e-05	2.47252e-05	2.36544e-05	1.92747e-05	2.26039e-05	1.90995e-05	3.23654e-05	1.91557e-05	1.36689e-05	2.30412e-05	1.86651e-05	2.74557e-05	3.00123e-05	2.66286e-05	1.68378e-05	2.46874e-05	1.59379e-05	2.5032e-05	2.11752e-05	2.16745e-05	2.06299e-05	2.73251e-05	1.72267e-05	1.94349e-05	2.34689e-05	2.32487e-05	1.92033e-05	2.67162e-05	1.92758e-05	1.75229e-05	2.32054e-05	1.59094e-05	1.47921e-05	1.70022e-05	3.32091e-05	2.19729e-05	2.11982e-05	1.54422e-05	1.67729e-05	1.77727e-05
562	PI(16:0/18:1)	0.866568	835.533	365.911	4.57478e-09	7.31236e-05	0.000101857	6.36537e-05	6.86511e-05	8.14669e-05	0.0001084	9.1847e-05	0.000106379	0.000102134	0.000115228	9.13146e-05	8.5031e-05	0.000102101	0.000100872	8.28473e-05	0.000120932	7.0853e-05	8.05515e-05	8.09357e-05	8.64091e-05	0.000143692	9.35647e-05	0.000159486	9.45617e-05	7.93885e-05	7.92381e-05	0.000101611	9.6759e-05	9.10242e-05	0.000147476	9.0784e-05	8.55132e-05	0.000109787	0.000120606	0.000108388	0.000155915	0.000126724	0.000135783	8.35764e-05	8.42608e-05	0.000109407	8.95686e-05	9.83907e-05	9.98853e-05
431	PI(16:0/20:2)	0.877259	861.539	321.448	1.56569e-05	2.85994e-05	2.26128e-05	2.64313e-05	1.93664e-05	1.4596e-05	4.89844e-05	1.78357e-05	2.36267e-05	2.40279e-05	1.20311e-05	1.17474e-05	2.33986e-05	3.89111e-05	1.70043e-05	2.44204e-05	1.85428e-05	1.45546e-05	2.36724e-05	3.13959e-05	2.28708e-05	2.60181e-05	1.91205e-05	2.10114e-05	2.9757e-05	2.22167e-05	2.25268e-05	5.09445e-05	2.85572e-05	3.15186e-05	3.29263e-05	3.64391e-05	2.79513e-05	4.51526e-05	4.25625e-05	3.44152e-05	4.85482e-05	4.4737e-05	2.60563e-05	1.45958e-05	2.35828e-05	3.14319e-05	2.39966e-05	2.99991e-05	2.58669e-05
547	PI(16:0/20:4)	0.871781	857.516	302.055	0.000397104	0.000622314	0.000786116	0.000653934	0.000582187	0.000917874	0.000971046	0.000618968	0.000986115	0.000807523	0.000562826	0.000459351	0.000462796	0.000705544	0.000524301	0.000853617	0.000529445	0.00042086	0.000803858	0.00110701	0.00068864	0.000677459	0.000578137	0.000904724	0.0006842	0.00064675	0.000631977	0.00108883	0.000773175	0.000844943	0.000894115	0.000977573	0.000689377	1.21068e-09	0.000847657	0.000729812	0.00117762	0.00110641	0.000526255	0.000378851	0.000501668	0.000732977	0.000679827	0.000773155	0.000786486
588	PI(17:0/17:0)	0.848602	837.547	391.103	1.76515e-05	1.81031e-05	2.56714e-05	2.07383e-05	1.5159e-05	2.55607e-05	2.03559e-05	5.23143e-05	3.59557e-05	1.82066e-05	2.21481e-05	1.38654e-05	5.06887e-05	1.13128e-09	1.95389e-05	1.15489e-05	2.31449e-05	5.04912e-05	2.40522e-05	2.31071e-05	2.44152e-05	3.26695e-05	1.37457e-05	2.4436e-05	1.32077e-05	2.64265e-05	1.55707e-05	2.47414e-05	1.77939e-05	1.90186e-05	1.19971e-09	2.18032e-05	2.50065e-05	4.27204e-05	1.29905e-09	1.76639e-05	4.92569e-05	2.91731e-05	5.44514e-05	1.19464e-05	1.33686e-05	2.26501e-05	1.80579e-05	1.69876e-05	2.15696e-05
421	PI(17:0/20:3)	0.884043	873.541	327.438	3.64942e-06	7.09268e-06	4.58941e-06	3.25635e-06	4.43612e-06	5.2614e-06	4.64407e-06	5.28402e-06	1.18992e-09	5.29491e-06	5.16033e-06	6.75136e-06	2.90535e-06	7.41446e-06	4.09801e-06	8.3697e-06	3.06029e-06	3.99198e-06	4.68686e-06	5.10715e-06	4.75275e-06	7.47077e-06	5.69021e-06	8.66832e-06	4.34678e-06	5.9879e-06	4.5973e-06	8.19544e-06	4.48829e-06	5.15593e-06	5.37592e-06	1.05536e-05	5.65006e-06	1.02176e-05	9.76467e-06	5.34464e-06	8.54559e-06	6.70746e-06	6.35029e-06	2.74988e-06	5.99677e-06	6.59287e-06	5.17133e-06	5.66082e-06	5.65795e-06
409	PI(17:0/20:4)	0.887377	871.547	308.301	8.86234e-07	1.48769e-06	3.97813e-06	2.26487e-06	3.856e-06	5.94246e-06	5.04265e-06	1.87618e-06	1.18992e-09	2.9217e-06	1.86532e-06	1.86339e-06	2.07123e-06	3.1665e-06	5.20126e-06	1.20595e-06	2.82106e-06	3.29542e-06	1.98143e-06	1.17511e-09	2.58649e-06	1.76345e-06	1.73544e-06	2.4335e-06	2.56919e-06	2.3657e-06	1.40321e-06	6.00236e-06	2.74511e-06	5.62327e-06	4.22948e-06	1.94086e-06	5.69518e-06	3.22855e-06	2.13924e-06	1.33077e-06	3.188e-06	3.81424e-06	1.58589e-06	1.39026e-06	1.29421e-06	2.8239e-06	3.07897e-06	3.03413e-06	3.08768e-06
585	PI(17:1/17:1)	0.852833	833.515	326.031	6.72093e-06	7.67123e-06	5.36758e-06	7.5402e-06	6.20966e-06	8.61223e-06	9.52753e-06	8.14771e-06	9.81151e-06	4.47427e-06	8.69645e-06	5.06346e-06	5.76291e-06	8.34461e-06	9.18378e-06	1.06835e-05	7.46836e-06	4.76041e-06	8.83143e-06	8.53004e-06	7.57039e-06	1.30829e-09	8.31787e-06	1.22256e-09	9.88666e-06	6.22062e-06	7.91886e-06	1.10363e-05	6.02693e-06	7.35757e-06	1.2321e-05	8.74342e-06	5.96591e-06	1.12495e-05	1.09399e-05	9.21984e-06	1.18155e-09	1.27249e-09	8.18081e-06	5.25683e-06	5.63984e-06	6.71435e-06	8.24059e-06	9.57149e-06	8.89452e-06
561	PI(18:0/16:1)	0.866697	835.533	342.829	0.000115328	9.25653e-05	0.000107871	0.000114508	7.0286e-05	0.000111031	0.000105746	7.46678e-05	0.000120882	9.48901e-05	8.91472e-05	6.07274e-05	6.68239e-05	9.17705e-05	6.86215e-05	0.000158366	7.90444e-05	5.28725e-05	8.57195e-05	0.000153274	9.57071e-05	9.98845e-05	7.19281e-05	0.000106153	8.96304e-05	0.000110152	7.95933e-05	0.000124938	7.73891e-05	0.000113929	0.000115485	0.000115596	8.31064e-05	1.21068e-09	9.67875e-05	8.45542e-05	0.000150113	0.000140647	6.701e-05	6.14024e-05	6.40068e-05	9.26153e-05	8.93742e-05	0.000103468	9.87635e-05
563	PI(18:0/18:1)	0.866507	863.555	355.839	1.10385e-05	9.21249e-06	9.23458e-06	1.23114e-05	8.34556e-06	1.22687e-05	1.2511e-05	6.58498e-06	1.09334e-05	1.65475e-05	1.21229e-05	6.81363e-06	5.98556e-06	1.18794e-05	8.05075e-06	1.55606e-05	9.22696e-06	6.38127e-06	1.12996e-05	1.47681e-05	1.05538e-05	1.29896e-05	8.88813e-06	1.11834e-05	7.03132e-06	1.15747e-05	1.0441e-05	1.17102e-05	9.27073e-06	1.29233e-05	1.07693e-05	1.07369e-05	1.01824e-05	1.67472e-05	1.05301e-05	1.01729e-05	1.18155e-09	1.27249e-09	8.85088e-06	8.69542e-06	7.42393e-06	9.5062e-06	1.03045e-05	1.12803e-05	1.07361e-05
581	PI(18:0/20:3)	0.857618	887.563	383.209	2.11264e-05	2.68374e-05	1.47902e-05	3.25835e-05	2.62161e-05	2.94972e-05	3.92507e-05	1.97434e-05	2.7258e-05	2.36976e-05	1.40872e-05	1.87424e-05	1.69984e-05	4.04896e-05	2.09829e-05	2.75099e-05	2.31279e-05	2.38554e-05	2.23172e-05	3.19755e-05	2.50543e-05	4.74185e-05	2.72293e-05	3.00194e-05	3.04448e-05	3.56142e-05	4.39123e-05	4.76961e-05	2.87743e-05	4.13585e-05	3.08989e-05	2.88356e-05	2.29045e-05	3.15444e-05	2.65976e-05	4.51674e-05	4.96303e-05	1.27249e-09	2.69981e-05	2.10343e-05	2.75225e-05	3.21801e-05	2.75239e-05	3.05063e-05	3.11164e-05
386	PI(18:0/22:4)	0.896413	913.581	395.182	1.23343e-06	3.90522e-06	4.25514e-06	5.46156e-06	3.7022e-06	5.71683e-06	6.35774e-06	4.13253e-06	6.00436e-06	5.60067e-06	4.11435e-06	2.08586e-06	2.79839e-06	8.27042e-06	4.44919e-06	5.59453e-06	4.00199e-06	3.34979e-06	5.59836e-06	7.44497e-06	4.70388e-06	8.51194e-06	3.35416e-06	6.90688e-06	3.51692e-06	5.5504e-06	4.77493e-06	8.48816e-06	6.62072e-06	6.70362e-06	8.01891e-06	6.03716e-06	4.64782e-06	8.69496e-06	6.10296e-06	4.85661e-06	1.18155e-09	1.08938e-05	4.6926e-06	1.98674e-06	2.97641e-06	5.66684e-06	5.33391e-06	6.09485e-06	6.28968e-06
543	PI(18:0/22:6)	0.874236	909.509	366.221	3.31282e-07	8.58551e-07	7.94837e-07	7.71955e-07	1.23718e-06	1.31487e-06	5.63874e-07	8.41256e-07	9.04424e-07	1.23703e-06	7.23818e-07	7.54684e-07	8.72984e-07	4.26875e-07	8.11501e-07	5.59581e-07	6.21569e-07	6.31896e-07	4.50636e-07	1.0069e-06	7.85785e-07	6.80942e-07	8.38567e-07	6.87005e-07	3.352e-07	8.91849e-07	5.55162e-07	4.22558e-07	1.19335e-09	1.01755e-06	8.30049e-07	6.66549e-07	1.3565e-06	8.13279e-07	6.9979e-07	6.88397e-07	6.41557e-07	5.62057e-07	7.51724e-07	6.47244e-07	4.88706e-07	6.78794e-07	6.60877e-07	9.07736e-07	6.60137e-07
541	PI(18:1/18:1)	0.875264	861.549	355.783	0.00010279	6.00312e-05	7.808e-05	8.55579e-05	5.62263e-05	8.30883e-05	8.36276e-05	4.75168e-05	6.44026e-05	0.000105497	7.89261e-05	3.39798e-05	3.60949e-05	7.99212e-05	5.35134e-05	0.000106139	6.47521e-05	4.35473e-05	7.16017e-05	0.000100144	7.17718e-05	8.76849e-05	5.7659e-05	7.01048e-05	5.83741e-05	7.68244e-05	7.31857e-05	7.93786e-05	6.97385e-05	8.86881e-05	7.15978e-05	7.22279e-05	6.80397e-05	0.000110753	7.51007e-05	6.96145e-05	1.18155e-09	1.27249e-09	6.43429e-05	5.73773e-05	4.66153e-05	6.48655e-05	6.82745e-05	7.31454e-05	7.73481e-05
405	PI(18:1/20:4)	0.889483	883.533	307.876	0.000130742	0.000165198	0.000190598	0.00019102	0.000125431	0.00020942	0.000190214	0.000129798	0.000235373	0.000198498	0.000153701	0.000140619	0.000128367	0.000190727	0.000158111	0.000281745	0.000112587	8.97536e-05	0.000186429	0.000228174	0.000171825	0.00021059	0.000135438	0.000186534	0.000185083	0.000205752	0.000178151	0.000300349	0.000143997	0.000214244	0.000200889	0.00029637	0.000169393	1.21068e-09	0.00020039	0.000183122	0.00030705	0.000295188	0.000103415	0.00012278	0.000118076	0.000187841	0.000220409	0.000197896	0.00019322
389	PI(18:2/20:4)	0.895599	881.519	289.938	3.55748e-05	0.000102876	5.02903e-05	3.95333e-05	3.91621e-05	6.97718e-05	6.97488e-05	5.2014e-05	0.000102364	9.5944e-05	4.85901e-05	2.76303e-05	4.3302e-05	6.57412e-05	6.77611e-05	8.2357e-05	5.12742e-05	2.45089e-05	5.51182e-05	0.000106239	6.14901e-05	4.41238e-05	5.83127e-05	0.000124509	4.39854e-05	5.9911e-05	0.000119304	1.21998e-09	5.29563e-05	7.04477e-05	6.87414e-05	0.000124501	5.48987e-05	0.000127813	8.64621e-05	6.05562e-05	0.000133629	0.00013907	5.04347e-05	2.42164e-05	3.4844e-05	7.3936e-05	6.45325e-05	6.81279e-05	7.40423e-05
558	PI(19:1/19:1)	0.868607	889.573	369.142	2.64922e-05	4.13695e-05	2.25142e-05	3.78438e-05	3.10643e-05	2.29952e-05	5.36505e-05	2.62475e-05	3.85398e-05	3.8851e-05	2.36763e-05	1.87141e-05	3.39288e-05	7.02816e-05	2.64625e-05	3.68624e-05	2.66809e-05	2.48949e-05	2.9467e-05	4.79394e-05	3.39238e-05	5.25266e-05	3.49946e-05	4.28436e-05	3.89162e-05	4.13398e-05	3.70688e-05	6.96442e-05	4.64731e-05	4.33111e-05	3.93165e-05	4.46315e-05	4.4048e-05	4.89825e-05	5.80083e-05	4.63488e-05	6.6811e-05	1.27249e-09	4.96431e-05	2.28073e-05	3.38785e-05	4.30797e-05	3.64792e-05	4.08918e-05	4.12196e-05
552	PI(19:2/19:2)	0.870301	885.547	396.396	2.55179e-05	8.63359e-06	9.86494e-06	1.13971e-05	1.13034e-05	1.03798e-05	1.30837e-09	2.02973e-05	5.30456e-06	1.24641e-09	1.01824e-05	8.34705e-06	8.8563e-06	1.14607e-05	1.10682e-05	1.129e-05	1.02302e-05	1.11041e-05	1.11404e-05	1.25733e-05	1.04477e-05	7.0777e-06	9.57668e-06	9.00269e-06	9.65625e-06	8.25554e-06	1.14199e-05	1.21998e-09	1.19335e-09	1.2648e-05	9.6249e-06	1.26938e-09	2.11188e-05	5.7836e-06	9.39357e-06	7.22841e-06	1.44254e-05	1.26892e-05	1.10279e-05	9.16985e-06	8.66847e-06	8.83852e-06	4.38845e-06	1.16005e-05	1.25436e-05
586	PI(20:2/20:2)	0.852543	913.573	368.983	1.95508e-06	2.22305e-06	3.07021e-06	3.01505e-06	2.2816e-06	2.77724e-06	4.41631e-06	1.74708e-06	3.54179e-06	2.88469e-06	1.48024e-06	1.54318e-06	2.17837e-06	4.08421e-06	2.49519e-06	3.38996e-06	3.04421e-06	2.2556e-06	2.60305e-06	4.26882e-06	2.76275e-06	3.88231e-06	2.21387e-06	3.08691e-06	2.09085e-06	3.1829e-06	4.35283e-06	4.50343e-06	2.99416e-06	4.67482e-06	4.5509e-06	2.80888e-06	3.05411e-06	3.87497e-06	3.02173e-06	3.87924e-06	5.49223e-06	1.27249e-09	2.56279e-06	1.89192e-06	1.67027e-06	3.18952e-06	3.08192e-06	3.09205e-06	2.96067e-06
425	PI(20:2/20:4)	0.88174	909.549	310.328	1.67199e-06	2.95344e-06	2.81058e-06	3.44824e-06	1.54541e-06	1.08526e-05	4.07949e-06	1.92132e-06	9.24839e-06	2.35243e-06	1.65029e-06	6.16315e-06	2.22157e-06	4.09168e-06	1.74667e-06	1.03078e-05	1.95555e-06	9.74858e-08	8.53688e-06	1.12686e-05	4.44618e-06	2.64041e-06	6.66169e-06	1.45996e-06	2.52056e-06	8.81959e-06	7.95552e-06	7.31845e-06	7.27166e-06	4.67487e-06	2.36855e-06	1.10812e-05	4.37213e-06	1.21068e-09	1.1255e-05	4.57079e-06	7.90924e-06	1.00328e-05	2.65261e-06	1.68165e-06	4.88875e-06	5.50683e-06	3.1234e-06	3.60057e-06	3.19298e-06
427	PMeOH(16:1/26:4)	0.880123	810.599	516.5	0.00195013	0.000485721	0.000559524	0.000486603	0.000446102	0.000513401	0.000423108	0.000473413	0.000468662	0.000379793	0.000517438	0.000566482	0.000503808	0.000508776	1.32527e-09	0.000489461	0.000578955	0.000465371	0.000507588	0.000447006	0.000538567	0.00062242	0.000386163	0.00053768	0.00046401	0.00065218	0.00048799	0.000387262	0.000430021	0.00056415	0.000492662	0.000403995	0.000414166	0.000436995	0.000449004	0.000483409	0.000478493	0.000471274	0.000550352	0.000551104	1.32969e-09	0.000463167	0.000415682	0.000456477	0.000460964
769	PMeOH(26:1/22:6)	0.695573	871.661	531.057	8.88289e-06	1.94226e-06	4.01247e-06	4.28253e-06	1.01651e-06	1.34498e-06	2.63366e-06	3.63414e-06	1.19814e-06	2.10345e-06	3.35802e-06	2.16918e-06	4.52435e-06	1.21136e-06	3.12588e-06	3.67965e-06	1.37931e-06	3.36884e-06	3.20879e-06	1.87314e-06	2.94748e-06	1.78503e-06	1.88707e-06	1.90887e-06	1.43359e-09	2.22535e-06	1.50337e-06	1.98035e-06	1.17113e-06	1.21451e-06	3.07675e-06	5.94855e-07	1.47183e-09	1.58369e-06	1.93412e-06	3.7138e-06	1.60464e-06	1.27249e-09	1.19448e-06	1.87644e-06	3.34045e-06	1.62995e-06	2.7544e-06	2.62169e-06	2.93517e-06
551	PS(16:0/16:0)	0.870522	734.478	345.569	5.25444e-07	1.14173e-06	5.01429e-07	8.15176e-07	6.24438e-07	7.0829e-07	7.28132e-07	1.76941e-06	1.00074e-06	5.69153e-07	1.56054e-06	7.53094e-07	1.61511e-06	1.09713e-06	1.11631e-06	1.30361e-06	8.1227e-07	6.80626e-07	6.47015e-07	1.01364e-06	9.49165e-07	1.3406e-06	1.15722e-06	8.08544e-07	1.40418e-06	9.21134e-07	8.74225e-07	8.83562e-07	1.13602e-06	5.52787e-07	6.68923e-07	1.02714e-06	8.06694e-07	8.54141e-07	8.37041e-07	1.03951e-06	1.29062e-06	1.14564e-06	1.54498e-06	7.05662e-07	7.19253e-07	9.85894e-07	9.6679e-07	7.48626e-07	9.01086e-07
650	PS(16:0/18:2)	0.805969	758.533	316.79	2.11536e-06	1.33755e-09	2.65675e-07	1.25535e-06	1.84881e-06	1.03999e-06	3.37517e-07	1.19895e-06	1.37179e-07	1.595e-07	1.02794e-06	4.13385e-07	1.24322e-06	7.57066e-07	1.32377e-06	1.54305e-06	4.81526e-07	5.25604e-07	7.20327e-08	1.65142e-06	8.69934e-07	1.31721e-06	5.72984e-07	7.06886e-07	7.98393e-07	1.07097e-06	1.20239e-06	3.38847e-07	1.05854e-06	3.02941e-07	7.14933e-08	5.11939e-07	5.86292e-07	7.08055e-07	4.52965e-07	9.38865e-07	8.22702e-07	1.30985e-07	6.47802e-07	5.31568e-07	1.03777e-06	6.9048e-07	9.9781e-07	1.12762e-06	1.14881e-06
736	PS(16:0/20:3)	0.740607	784.513	355.311	4.57478e-09	0.000110733	8.73823e-05	0.000116765	7.42519e-05	7.55445e-05	0.00011638	0.000110545	0.000133546	0.000107016	9.67908e-05	1.49885e-09	0.000137502	1.13128e-09	0.000110244	0.000117582	0.000112509	1.50377e-09	0.00011525	0.000120015	8.71032e-05	9.44048e-05	0.000116563	7.04296e-05	0.000152708	9.73148e-05	0.00011583	1.21998e-09	0.000127588	0.000100051	9.85053e-05	0.000119887	0.000111451	9.34032e-05	0.000119313	0.000117996	0.00014042	0.00010583	0.000105498	1.81728e-09	7.47523e-05	9.80974e-05	9.97079e-05	0.000112493	0.000111252
814	PS(16:0/20:4)	0.627421	782.496	330.482	7.2507e-05	9.01708e-05	0.000133825	0.000134138	9.8542e-05	0.000115169	9.55735e-05	8.91739e-05	0.000155386	0.000138462	8.09937e-05	9.08615e-05	5.90897e-05	0.000111559	0.00010885	9.53064e-05	8.5036e-05	7.45358e-05	9.73172e-05	0.000138642	0.000103257	0.000130079	0.000121998	0.000145986	7.84614e-05	6.69626e-05	7.17891e-05	0.000151828	0.000157604	9.89423e-05	0.000162755	0.000140916	0.000119763	0.000157115	7.54456e-05	6.30062e-05	0.000137462	0.000139368	5.32982e-05	0.000103757	8.96883e-05	0.000113311	0.000104909	0.000125778	0.00010794
871	PS(16:0/22:6)	0.546716	806.496	320.531	4.57478e-09	2.18985e-05	2.11977e-05	1.81749e-05	2.23828e-05	2.04243e-05	1.89597e-05	2.30829e-05	3.00974e-05	2.49348e-05	1.77007e-05	2.46194e-05	1.92768e-05	3.00428e-05	1.90611e-05	2.30759e-05	1.58062e-05	1.85982e-05	1.96341e-05	2.38086e-05	2.06391e-05	3.30988e-05	2.66437e-05	1.22256e-09	2.3679e-05	2.10485e-05	2.37441e-05	3.17765e-05	3.03861e-05	2.35444e-05	2.74224e-05	2.7314e-05	1.90994e-05	2.81747e-05	2.27073e-05	2.0559e-05	3.51081e-05	3.60254e-05	2.63731e-05	2.23001e-05	2.06161e-05	2.49811e-05	2.47338e-05	2.63922e-05	2.83711e-05
690	PS(18:0/18:1)	0.763912	788.545	424.214	4.57478e-09	0.000314155	0.000443521	0.00025534	0.000434782	0.000288914	0.000395144	0.000430717	0.000385173	0.00037098	0.000526513	0.000358561	0.000363614	0.000414587	0.000417796	0.000367003	0.000391913	1.50377e-09	0.000433516	0.000462684	0.000352746	0.000568305	0.000364743	0.00043308	0.000457224	0.000417876	1.46205e-09	0.00021163	0.000377831	0.000440518	0.000351368	0.000338433	0.000390856	0.000455866	0.0004358	0.000380254	1.18155e-09	0.000455989	0.000263346	0.000348095	0.000397381	0.00035443	0.000379493	0.000398371	0.000260084
737	PS(18:0/18:2)	0.739885	786.528	389.837	0.000407441	0.000293548	0.000146095	0.000470078	0.000320954	0.000179017	0.000344449	0.000143629	0.000307208	0.000441225	0.000422011	7.36949e-05	0.000122254	0.000274611	0.000188937	0.000214195	0.000181569	0.000233207	0.000217129	0.000324918	0.000265308	0.00039608	0.000173583	0.000312786	0.000168167	0.000150128	0.000198799	0.000219568	0.000317955	0.000312233	0.000210576	0.000331824	0.000143624	0.000235113	0.000278236	0.000177278	0.000321429	0.000297604	0.000238442	0.000129592	0.000269714	0.000244137	0.000205461	0.000218593	0.000364581
747	PS(18:0/20:3)	0.722168	812.544	400.005	0.000202249	0.000390922	0.000381488	0.000250908	0.000239818	0.000340253	0.000602273	0.000210711	0.000359837	6.31315e-05	0.00023468	0.00020842	0.000499713	0.000119265	0.000460613	0.000374972	0.000496251	0.000430325	0.000215062	0.000344412	0.000321265	0.000194868	0.000231069	0.000415833	0.000312586	0.000493013	0.000238074	0.000186177	0.000260613	0.000244035	0.000532006	0.000327048	0.000547396	0.000325894	1.29905e-09	0.000525247	0.000225923	0.000288608	0.000172454	0.000239708	0.000236152	0.000299835	0.000388873	0.000393731	0.000233939
787	PS(18:0/20:4)	0.661339	810.52	337.234	1.09335e-05	1.57169e-05	1.33256e-05	2.4504e-05	9.98238e-06	1.33523e-05	1.81994e-05	1.34595e-05	1.85184e-05	1.48309e-05	1.20221e-05	8.95532e-06	7.25469e-06	1.21259e-05	1.38422e-05	1.5186e-05	1.17338e-05	7.83295e-06	1.18198e-05	1.9688e-05	1.36642e-05	1.55153e-05	9.40225e-06	2.11934e-05	1.31928e-05	1.13119e-05	1.10384e-05	1.88656e-05	1.62077e-05	1.39375e-05	1.48404e-05	1.45554e-05	1.32917e-05	1.21068e-09	7.15745e-06	1.45298e-05	1.97245e-05	2.39297e-05	1.05806e-05	7.74165e-06	1.2145e-05	1.34581e-05	1.45058e-05	1.57405e-05	1.62447e-05
770	PS(18:0/22:4)	0.69299	838.552	383.379	5.85888e-06	9.43525e-06	3.16271e-06	1.34747e-05	6.79874e-06	1.20333e-05	1.26457e-05	5.66883e-06	1.28131e-05	7.90524e-06	7.04067e-06	5.06648e-06	4.90601e-06	1.70924e-05	1.27533e-05	7.56075e-06	1.84997e-05	5.10648e-06	2.33603e-06	6.94683e-06	8.85526e-06	6.95474e-06	7.66374e-06	1.18576e-05	5.03608e-06	6.86984e-06	6.72562e-06	1.55139e-05	6.99032e-06	2.23675e-05	1.55142e-05	1.01345e-05	1.97848e-05	2.09606e-05	3.13598e-06	7.80265e-06	1.18155e-09	2.49478e-05	9.55954e-06	5.65945e-06	6.19138e-06	1.06836e-05	8.41325e-06	9.2753e-06	1.22295e-05
818	PS(18:0/22:5)	0.619058	836.542	391.199	1.37603e-05	7.93174e-05	2.36859e-05	4.01988e-05	2.0784e-05	2.28371e-05	4.34428e-05	2.76873e-05	3.19287e-05	4.50026e-05	4.17439e-05	1.60307e-05	7.82023e-05	1.13128e-09	3.15131e-05	2.18572e-05	3.83108e-05	2.6065e-05	4.6259e-05	4.16744e-05	3.45151e-05	5.68941e-05	1.86255e-05	3.0842e-05	2.85401e-05	5.89484e-05	7.92967e-05	4.49859e-05	3.24063e-05	3.44174e-05	4.82637e-05	6.72653e-05	7.78643e-05	3.69555e-05	5.06444e-05	9.18269e-05	7.91315e-05	5.46278e-05	1.27449e-09	1.68187e-05	7.86393e-05	4.93498e-05	3.49473e-05	3.7187e-05	3.77523e-05
848	PS(18:0/22:6)	0.568737	834.526	403.908	2.42393e-05	1.21178e-05	1.56224e-05	1.57947e-05	3.64933e-05	1.30634e-05	4.48914e-05	3.25785e-05	1.59418e-05	4.22379e-05	4.81083e-05	1.59009e-05	1.8428e-05	1.70058e-05	3.99462e-05	1.47055e-05	4.53801e-05	1.92321e-05	4.54452e-05	1.10189e-05	2.64076e-05	2.31499e-05	3.88582e-05	4.10518e-05	2.18183e-05	1.60724e-05	3.70974e-05	3.72367e-05	1.6546e-05	1.89225e-05	4.37691e-05	3.19465e-05	2.06744e-05	3.61046e-05	1.96498e-05	4.31465e-05	1.73882e-05	4.4222e-05	1.76982e-05	2.00319e-05	1.76617e-05	2.81523e-05	3.70847e-05	1.73473e-05	4.93723e-05
782	PS(18:1/20:3)	0.669839	810.53	390.988	0.000124524	5.17843e-05	7.46615e-05	8.51271e-05	6.34754e-05	8.50321e-05	8.42161e-05	7.43249e-05	0.000100602	8.72328e-05	7.55137e-05	5.92807e-05	6.36803e-05	8.45953e-05	7.95016e-05	6.40993e-05	8.40779e-05	8.71005e-05	9.1491e-05	8.37233e-05	8.02022e-05	9.25978e-05	7.18116e-05	8.71661e-05	7.00273e-05	6.8297e-05	6.08913e-05	8.74269e-05	8.54243e-05	0.000104224	8.66957e-05	7.34753e-05	8.40182e-05	8.45249e-05	6.49641e-05	6.76734e-05	0.000111598	9.80329e-05	7.40508e-05	8.21971e-05	6.92604e-05	8.12178e-05	7.41068e-05	8.27237e-05	8.01461e-05
757	PS(18:1/20:4)	0.712903	808.505	295.998	3.06413e-06	2.16689e-06	1.23013e-06	2.37767e-06	9.58502e-07	1.14456e-06	1.4803e-07	1.3858e-06	2.19879e-06	1.07352e-06	1.61255e-06	9.8647e-07	1.58668e-06	1.87841e-06	1.44911e-06	3.18893e-06	1.38922e-06	1.28608e-06	1.59472e-06	2.99451e-06	1.68573e-06	2.10538e-06	1.26327e-06	1.4028e-06	2.03445e-06	2.26783e-06	1.23919e-06	2.22874e-06	1.57065e-06	1.82879e-06	1.65323e-06	1.89729e-06	1.31842e-06	1.21068e-09	1.80495e-06	1.77879e-06	2.45978e-06	2.33819e-06	1.24517e-06	1.67321e-06	9.41727e-07	1.65265e-06	1.76505e-06	2.02677e-06	2.03867e-06
881	PS(18:1/22:6)	0.536979	832.512	324.836	5.44788e-06	9.78779e-06	8.31078e-06	6.87229e-06	7.976e-06	9.18298e-06	9.70504e-06	1.24417e-05	1.47159e-05	1.48519e-05	1.08233e-05	1.31156e-06	1.00272e-05	8.75291e-06	1.59454e-05	1.06631e-05	9.83826e-06	6.15728e-06	1.05578e-05	9.71853e-06	9.65438e-06	1.30829e-09	1.323e-05	1.22256e-09	1.35435e-05	7.83933e-06	4.57564e-06	1.18689e-05	7.60997e-06	9.02461e-06	1.19971e-09	1.16299e-05	7.02544e-06	1.08268e-05	1.72331e-05	1.17997e-05	1.62516e-05	2.01722e-05	1.59175e-05	7.75451e-06	9.25995e-06	9.77832e-06	1.43169e-05	1.46787e-05	1.05835e-05
825	PS(18:2/18:2)	0.600339	782.495	420.362	5.96267e-05	3.43174e-05	2.69541e-05	3.23409e-05	3.77361e-05	3.14118e-05	3.11229e-05	2.64365e-05	2.14575e-05	3.23997e-05	2.53802e-05	2.25008e-05	3.0077e-05	2.85648e-05	3.01176e-05	3.07979e-05	2.52404e-05	2.66694e-05	3.13465e-05	3.35973e-05	3.09048e-05	2.97989e-05	3.33351e-05	2.44238e-05	3.2041e-05	2.41363e-05	3.47426e-05	2.65674e-05	3.11787e-05	2.36797e-05	2.31582e-05	2.87602e-05	2.98044e-05	2.37336e-05	2.5176e-05	2.83231e-05	2.83091e-05	3.71857e-05	2.77619e-05	2.96059e-05	3.2018e-05	2.8687e-05	2.36418e-05	2.63562e-05	2.6397e-05
578	PS(2:0/15:1)	0.859982	524.297	50.9635	4.57478e-09	1.26138e-06	1.04905e-06	1.84519e-06	1.71146e-06	1.4508e-06	2.02276e-06	1.31589e-06	2.52417e-06	1.92283e-06	3.62716e-06	3.70779e-07	1.29625e-06	2.08197e-06	1.14667e-06	2.55917e-06	7.92942e-07	1.0252e-06	1.96961e-06	1.94697e-06	1.59624e-06	2.25866e-06	1.49474e-06	1.22256e-09	5.6545e-07	2.08095e-06	8.93397e-07	2.13711e-06	1.96421e-06	1.0916e-06	3.58938e-06	2.03809e-06	1.6299e-06	2.75572e-06	2.04702e-06	1.09063e-06	1.18155e-09	2.28143e-06	2.41581e-06	2.78749e-07	3.80057e-07	1.54977e-06	1.19867e-06	8.75089e-07	8.93359e-07
906	PS(2:0/21:0)	0.486154	610.407	131.16	1.00331e-05	7.02269e-06	1.86766e-06	7.54593e-06	6.51161e-06	4.98457e-06	2.27886e-06	6.15441e-06	4.20875e-06	1.52641e-06	7.25658e-06	3.36199e-06	4.85842e-06	4.12991e-06	4.00179e-06	5.04512e-06	4.8869e-06	5.29807e-06	1.83809e-06	4.83613e-06	4.88235e-06	5.46511e-06	4.90054e-06	4.87637e-06	4.25341e-06	7.46946e-06	6.86361e-06	2.69953e-06	7.59838e-06	2.42361e-06	4.0162e-06	2.77692e-06	3.93724e-06	4.91915e-06	4.90202e-06	4.50919e-06	3.99147e-06	1.18256e-06	4.66447e-06	4.29596e-06	3.89225e-06	4.48187e-06	4.35985e-06	4.4509e-06	4.71541e-06
817	PS(20:4/20:4)	0.62126	830.494	399.607	4.57478e-09	2.32576e-05	2.6011e-05	2.00202e-05	2.5374e-05	2.64026e-05	2.45154e-05	2.58623e-05	3.62006e-05	3.2889e-05	2.18129e-05	3.27144e-05	2.5478e-05	2.93561e-05	2.52238e-05	2.45861e-05	2.8494e-05	2.24759e-05	2.50531e-05	2.89585e-05	2.52345e-05	2.34804e-05	2.80498e-05	3.24248e-05	2.89609e-05	2.11648e-05	2.77925e-05	2.62432e-05	1.19335e-09	2.54634e-05	2.84455e-05	3.1859e-05	2.34593e-05	2.86767e-05	2.56198e-05	3.41188e-05	2.70979e-05	3.50606e-05	3.20113e-05	2.67823e-05	2.63292e-05	2.66521e-05	2.21483e-05	2.60795e-05	2.61072e-05
36	SHexCer(d26:2)	0.999854	664.384	101.802	1.29775e-05	1.19044e-05	5.14491e-06	1.10734e-05	9.35178e-06	6.96545e-06	4.84631e-06	1.09276e-05	8.19456e-06	3.09947e-06	9.13617e-06	4.17217e-06	6.81967e-06	5.71854e-06	5.96805e-06	9.91384e-06	7.46901e-06	5.82501e-06	4.35129e-06	8.45773e-06	7.61585e-06	9.19423e-06	1.10193e-05	9.56017e-06	7.55717e-06	1.56074e-05	1.06505e-05	7.30441e-06	1.01215e-05	4.9564e-06	8.8988e-06	8.63414e-06	8.91993e-06	1.08889e-05	1.2689e-05	7.60882e-06	8.04173e-06	3.84798e-06	8.16166e-06	5.13061e-06	8.96857e-06	8.88807e-06	8.42525e-06	8.8371e-06	7.9205e-06
14	SHexCer(d35:3)	0.999992	788.514	366.165	2.01681e-05	2.52343e-05	2.90359e-05	3.15636e-05	1.83512e-05	2.95426e-05	2.9983e-05	3.86442e-05	3.27284e-05	4.27931e-05	2.71263e-05	1.98355e-05	2.05727e-05	3.22929e-05	2.56033e-05	2.36644e-05	1.50291e-05	1.2333e-05	2.6134e-05	3.46018e-05	2.67619e-05	1.61358e-05	3.56207e-05	3.67472e-05	1.47616e-05	1.6408e-05	1.92113e-05	2.5839e-05	3.086e-05	1.99897e-05	3.48605e-05	2.78082e-05	2.40297e-05	3.90879e-05	4.46255e-05	2.58781e-05	3.80152e-05	3.60949e-05	2.18367e-05	1.08056e-05	1.79547e-05	2.68285e-05	2.48287e-05	2.76873e-05	2.88734e-05
35	SHexCer(d37:2)	0.999854	818.555	277.774	1.65494e-05	1.19202e-05	6.97507e-06	1.17343e-05	1.17922e-05	6.91571e-06	1.01625e-05	7.97191e-06	4.57813e-06	1.8276e-06	8.8499e-06	1.15667e-05	7.15743e-06	5.4127e-06	6.8703e-06	1.11197e-05	1.27401e-05	6.6907e-06	5.19602e-06	7.07906e-06	8.65548e-06	1.30829e-09	7.68309e-06	6.36735e-06	6.96905e-06	7.84078e-06	1.05064e-05	3.54311e-06	1.14072e-05	6.06834e-06	2.88377e-06	1.27447e-05	4.608e-06	4.95428e-06	5.68306e-06	8.15983e-06	4.94332e-06	8.468e-06	6.31694e-06	5.91516e-06	5.00315e-06	6.50334e-06	6.82638e-06	6.17899e-06	6.2773e-06
34	SHexCer(d37:3)	0.999854	816.503	423.233	4.57478e-09	6.76074e-06	6.95265e-06	1.28133e-09	5.80683e-06	6.78078e-06	8.38456e-06	5.8712e-06	8.57462e-06	6.3739e-06	5.82163e-06	1.04091e-05	7.39513e-06	5.90415e-06	6.26818e-06	4.03004e-06	1.02996e-05	8.4484e-06	6.62192e-06	4.72812e-06	6.27187e-06	7.04937e-06	7.93441e-06	8.90039e-06	8.24508e-06	6.0028e-06	7.94871e-06	7.7884e-06	6.60748e-06	7.35743e-06	7.25416e-06	7.68698e-06	8.97214e-06	6.21443e-06	8.09999e-06	7.78239e-06	6.09529e-06	5.45372e-06	7.43738e-06	7.73105e-06	8.11976e-06	7.43407e-06	5.8168e-06	5.99098e-06	5.73866e-06
17	SHexCer(d48:0)	0.999978	976.738	580.723	3.20136e-05	3.1425e-05	1.48799e-05	2.38433e-05	3.56196e-05	3.15688e-05	1.60907e-05	3.25594e-05	2.06353e-05	6.92502e-06	2.29252e-05	2.21818e-05	2.60555e-05	1.78705e-05	2.67392e-05	2.1916e-05	2.38438e-05	2.75141e-05	1.17566e-05	3.19743e-05	2.39169e-05	2.03545e-05	2.12747e-05	1.31676e-05	2.1318e-05	1.84346e-05	2.02669e-05	1.2786e-05	3.31935e-05	8.29746e-06	1.57487e-05	1.28141e-05	1.38271e-05	2.02966e-05	1.38708e-05	2.11489e-05	1.38326e-05	5.58345e-06	1.26759e-05	1.93436e-05	1.95005e-05	1.68868e-05	1.76002e-05	2.00943e-05	2.05299e-05
30	SHexCer(d49:2)	0.999854	986.759	597.853	6.93455e-05	4.34181e-05	2.2898e-05	3.4177e-05	3.96328e-05	2.47845e-05	2.36952e-05	3.7249e-05	2.45585e-05	9.87819e-06	3.51122e-05	3.78373e-05	4.29733e-05	2.76937e-05	3.70151e-05	2.61761e-05	2.45467e-05	4.06971e-05	1.69176e-05	3.50664e-05	3.26836e-05	3.95638e-05	2.58708e-05	2.43094e-05	2.47782e-05	3.30713e-05	2.91402e-05	2.01993e-05	3.27555e-05	1.36224e-05	2.27333e-05	1.79927e-05	2.16773e-05	2.82204e-05	2.5885e-05	3.09386e-05	2.27405e-05	8.00784e-06	2.43027e-05	3.02174e-05	2.84641e-05	2.52245e-05	2.49976e-05	2.96664e-05	2.59694e-05
31	SHexCer(d49:3)	0.999854	984.742	586.477	3.65938e-05	3.28412e-05	1.20156e-05	1.43153e-05	2.24235e-05	2.17837e-05	1.76522e-05	2.46702e-05	2.09401e-05	7.1363e-06	3.00672e-05	2.37162e-05	2.44176e-05	2.1731e-05	2.69401e-05	1.88812e-05	2.91302e-05	2.96002e-05	1.03781e-05	2.13461e-05	2.2329e-05	3.39796e-05	1.99005e-05	1.70747e-05	2.37265e-05	1.76491e-05	2.19895e-05	1.59391e-05	1.19335e-09	9.11585e-06	1.72479e-05	1.30398e-05	1.48399e-05	1.63712e-05	2.13833e-05	2.97262e-05	1.87572e-05	1.27249e-09	2.18366e-05	2.18009e-05	2.48888e-05	1.79635e-05	1.99759e-05	1.97624e-05	2.09242e-05
16	SHexCer(d50:0)	0.999984	1004.8	631.221	1.11169e-06	1.25119e-06	1.3543e-07	5.9949e-07	1.70934e-06	1.07777e-06	4.36618e-07	1.7906e-06	1.046e-06	3.75785e-08	9.76092e-07	1.529e-06	1.32829e-06	7.0706e-07	1.27896e-06	1.39373e-06	6.79586e-07	1.06309e-06	1.01009e-07	1.23091e-06	9.74172e-07	1.30829e-09	8.01114e-07	9.37055e-07	4.01667e-07	1.12998e-06	1.26595e-06	1.11972e-07	7.56417e-07	2.0663e-07	3.69465e-07	9.37305e-08	3.93091e-07	5.96979e-07	3.87206e-07	9.69362e-07	3.66535e-07	4.38586e-08	9.90068e-07	5.89572e-07	3.46711e-07	5.37933e-07	9.91873e-07	8.59702e-07	8.88548e-07
32	SHexCer(d50:1)	0.999854	1002.75	581.742	3.43818e-05	2.70984e-05	1.31131e-05	2.44896e-05	2.50087e-05	2.25832e-05	1.27968e-05	2.82123e-05	1.8836e-05	5.912e-06	2.20851e-05	1.88882e-05	2.41663e-05	1.44704e-05	2.4616e-05	2.63482e-05	1.63544e-05	2.10191e-05	1.21167e-05	2.68414e-05	2.09669e-05	1.92019e-05	1.57473e-05	1.04444e-05	1.65373e-05	1.85539e-05	2.0162e-05	1.07421e-05	2.21373e-05	7.47283e-06	1.36336e-05	1.14609e-05	1.0881e-05	1.81281e-05	1.26356e-05	1.8727e-05	1.36436e-05	4.93234e-06	1.12543e-05	1.70576e-05	1.58415e-05	1.44597e-05	1.56299e-05	1.72257e-05	1.77699e-05
24	SHexCer(d51:1)	0.999854	1016.8	643.615	8.77985e-05	4.0331e-05	2.1738e-05	4.7926e-05	4.355e-05	5.05382e-05	3.19001e-05	6.42941e-05	3.44759e-05	1.06969e-05	4.84155e-05	4.50983e-05	5.6058e-05	2.95894e-05	4.97051e-05	5.3471e-05	4.22125e-05	6.23482e-05	1.77841e-05	5.62061e-05	4.47068e-05	6.32583e-05	2.85181e-05	3.33584e-05	2.41257e-05	4.30026e-05	3.47672e-05	2.05574e-05	5.61647e-05	1.65263e-05	3.0325e-05	1.35902e-05	2.26371e-05	3.74622e-05	2.51057e-05	3.9291e-05	2.32794e-05	1.1448e-05	2.68314e-05	5.43277e-05	2.58783e-05	3.15227e-05	3.66835e-05	3.57709e-05	4.02998e-05
27	SHexCer(d51:2)	0.999854	1014.79	621.777	6.48078e-05	3.81375e-05	1.74709e-05	4.13132e-05	4.38041e-05	4.08043e-05	2.91907e-05	4.00422e-05	3.63075e-05	1.0101e-05	4.88239e-05	4.28866e-05	4.31474e-05	2.28564e-05	4.55652e-05	3.43751e-05	3.55662e-05	4.04025e-05	1.66328e-05	5.26338e-05	3.72434e-05	4.21177e-05	3.16574e-05	1.87995e-05	1.87184e-05	3.72145e-05	3.70976e-05	1.50688e-05	4.26384e-05	1.36447e-05	2.23329e-05	1.88222e-05	2.59607e-05	3.21271e-05	2.93313e-05	3.68959e-05	1.76469e-05	1.01554e-05	3.13416e-05	4.34281e-05	2.94511e-05	2.77225e-05	3.37562e-05	2.90271e-05	2.76898e-05
28	SHexCer(d51:3)	0.999854	1012.77	612.078	4.47715e-05	3.64656e-05	2.09442e-05	2.01491e-05	2.62873e-05	3.20618e-05	2.18379e-05	4.29753e-05	2.81168e-05	9.39862e-06	3.70078e-05	3.97188e-05	3.29556e-05	2.49665e-05	4.01584e-05	2.98741e-05	3.39054e-05	3.51378e-05	1.37413e-05	3.21864e-05	3.0133e-05	1.30829e-09	2.7946e-05	2.62051e-05	2.18526e-05	2.85564e-05	2.87495e-05	1.78201e-05	1.19335e-09	1.31842e-05	2.39158e-05	1.48747e-05	1.76677e-05	2.69946e-05	2.80077e-05	4.03963e-05	1.92304e-05	6.24567e-06	2.80498e-05	3.04319e-05	2.25197e-05	2.11325e-05	2.46527e-05	2.58742e-05	2.46903e-05
26	SHexCer(d52:0)	0.999854	1032.8	629.105	7.39099e-05	4.74558e-05	2.12191e-05	6.15244e-05	5.33077e-05	6.77911e-05	2.58851e-05	6.93406e-05	4.26086e-05	1.2844e-05	6.23463e-05	3.63297e-05	5.25818e-05	3.0818e-05	4.2841e-05	4.57854e-05	3.67057e-05	4.32231e-05	1.88858e-05	5.5807e-05	4.50605e-05	4.78968e-05	3.65269e-05	2.76677e-05	2.61006e-05	3.38544e-05	4.41912e-05	2.00251e-05	5.04634e-05	1.44122e-05	2.49332e-05	1.83968e-05	2.51235e-05	3.45741e-05	2.34449e-05	4.48989e-05	2.22209e-05	9.75807e-06	2.62919e-05	4.22664e-05	2.60414e-05	2.99544e-05	3.25695e-05	3.43475e-05	4.25208e-05
29	SHexCer(d52:1)	0.999854	1030.78	608.125	5.58808e-05	3.37783e-05	1.66935e-05	3.43775e-05	3.22133e-05	3.6218e-05	1.8971e-05	5.07044e-05	2.41495e-05	8.12994e-06	3.24715e-05	2.16824e-05	3.40254e-05	1.96673e-05	3.24053e-05	3.73773e-05	2.2894e-05	2.90526e-05	1.58184e-05	1.17511e-09	2.78256e-05	2.78018e-05	2.47879e-05	1.82137e-05	1.62613e-05	2.47712e-05	2.54913e-05	1.3284e-05	3.57348e-05	1.11461e-05	1.94481e-05	1.33977e-05	1.73683e-05	2.31892e-05	2.11655e-05	3.1458e-05	1.65259e-05	6.64352e-06	1.80372e-05	2.43595e-05	1.75983e-05	2.03342e-05	2.2216e-05	2.48854e-05	2.87228e-05
18	SHexCer(d52:2)	0.999961	1028.77	596.836	2.34351e-05	1.29366e-05	1.1247e-05	1.32063e-05	8.11566e-06	1.03882e-05	1.01463e-05	2.95703e-05	1.45174e-05	5.91165e-06	2.41877e-05	1.55862e-05	2.43951e-05	1.84234e-05	2.52905e-05	8.62417e-06	1.70116e-05	6.82561e-06	2.76009e-06	1.44813e-05	1.4853e-05	1.79435e-05	1.42714e-05	1.4275e-05	8.14044e-06	7.1573e-06	9.08563e-06	5.50024e-06	2.57733e-05	3.01886e-06	1.03908e-05	6.50492e-06	6.36402e-06	1.08304e-05	1.82915e-05	1.97156e-05	1.15515e-05	2.49805e-06	1.59587e-05	4.4791e-06	8.45128e-06	1.10101e-05	1.48972e-05	1.71738e-05	1.01279e-05
33	SHexCer(d52:3)	0.999854	1026.75	572.453	1.23436e-05	1.76422e-05	7.63315e-06	8.35361e-06	9.09442e-06	8.46301e-06	5.80244e-06	1.90902e-05	1.03768e-05	3.55275e-06	1.31321e-05	1.16778e-05	1.39412e-05	9.05211e-06	1.68888e-05	1.20787e-05	8.80108e-06	1.00118e-05	4.84645e-06	1.13906e-05	1.07086e-05	1.18244e-05	9.22207e-06	8.05126e-06	1.10879e-05	8.02626e-06	8.21065e-06	5.93192e-06	1.4676e-05	2.36098e-06	9.26789e-06	4.661e-06	3.93961e-06	1.14943e-05	1.15085e-05	1.31555e-05	5.86023e-06	1.63904e-06	1.00918e-05	7.09556e-06	1.01872e-05	8.4146e-06	9.45712e-06	1.0047e-05	8.80821e-06
25	SHexCer(d53:3)	0.999854	1040.8	635.714	1.75745e-05	1.06378e-05	5.35766e-06	1.41303e-05	1.20857e-05	1.4941e-05	8.23941e-06	1.74812e-05	1.02375e-05	2.74883e-06	1.33936e-05	1.51169e-05	1.48372e-05	7.70464e-06	1.12267e-05	1.78745e-05	1.42959e-05	1.3564e-05	5.42286e-06	1.24521e-05	1.19661e-05	2.15217e-05	7.71498e-06	7.07531e-06	7.59925e-06	9.12505e-06	1.33696e-05	3.88487e-06	1.35202e-05	3.16719e-06	8.92305e-06	4.70201e-06	5.63267e-06	9.57738e-06	6.7275e-06	9.73269e-06	6.8001e-06	1.86936e-06	1.27817e-05	1.17523e-05	5.29034e-06	8.53836e-06	8.25954e-06	8.84668e-06	1.10074e-05
98	SM(d14:0/18:0)	0.98665	677.558	365.799	4.57478e-09	3.2874e-05	1.62988e-05	4.04399e-05	1.63943e-05	2.40646e-05	2.57115e-05	2.51912e-05	2.20023e-05	2.20004e-05	2.76623e-05	1.84185e-05	3.03777e-05	3.209e-05	2.21331e-05	3.38992e-05	2.67342e-05	2.15774e-05	2.36136e-05	2.42205e-05	2.42854e-05	1.30829e-09	1.93508e-05	2.07004e-05	2.68448e-05	3.36021e-05	2.07972e-05	2.50261e-05	3.08099e-05	2.95915e-05	2.72281e-05	2.65595e-05	2.37741e-05	3.20218e-05	2.12433e-05	2.49548e-05	1.18155e-09	4.12469e-05	2.3528e-05	2.41032e-05	2.45073e-05	2.37946e-05	2.64338e-05	2.84919e-05	2.95764e-05
88	SM(d14:0/18:1)	0.989444	675.542	367.061	4.57478e-09	2.50332e-05	1.78977e-05	2.89639e-05	1.53581e-05	1.99742e-05	2.05565e-05	2.15962e-05	2.31809e-05	1.77994e-05	2.47664e-05	1.73728e-05	3.02107e-05	3.4612e-05	1.90243e-05	3.30319e-05	1.78635e-05	1.8883e-05	2.26986e-05	2.46124e-05	2.1672e-05	1.30829e-09	2.13316e-05	2.59683e-05	2.23391e-05	2.57953e-05	2.59231e-05	2.79592e-05	2.61717e-05	3.32463e-05	1.99715e-05	2.84169e-05	2.25153e-05	3.22366e-05	2.5651e-05	2.20092e-05	1.18155e-09	3.9063e-05	2.59805e-05	2.23846e-05	1.54219e-05	2.31194e-05	2.56833e-05	2.46287e-05	2.11172e-05
131	SM(d14:0/18:2)	0.978636	673.501	303.682	1.34306e-06	3.88855e-06	5.11817e-07	5.06872e-06	1.1865e-06	2.05145e-06	1.02137e-06	4.26323e-06	3.05794e-06	8.67016e-07	5.5972e-06	1.65932e-06	2.39691e-06	2.9902e-06	6.1132e-06	1.27075e-09	2.28792e-06	2.55114e-06	1.28486e-06	2.54017e-06	2.53409e-06	4.3574e-06	2.50503e-06	2.75645e-06	2.65453e-06	3.4134e-06	3.32767e-06	1.93949e-06	3.74973e-06	8.13246e-07	1.84085e-06	1.33221e-06	1.09639e-06	2.58936e-06	2.36311e-06	3.15104e-06	5.09099e-06	8.82087e-07	2.91464e-06	2.10968e-06	2.85691e-06	2.58721e-06	2.70533e-06	3.00446e-06	2.62525e-06
126	SM(d14:0/19:1)	0.979581	689.557	388.352	4.57478e-09	7.46798e-05	5.88747e-05	6.52702e-05	7.39059e-05	7.03315e-05	5.74573e-05	6.46903e-05	6.49381e-05	5.34946e-05	7.91696e-05	5.56966e-05	7.58416e-05	6.0431e-05	6.19267e-05	8.2524e-05	6.65377e-05	5.84113e-05	6.19275e-05	5.07198e-05	6.18416e-05	1.30829e-09	5.88583e-05	6.2048e-05	6.60385e-05	8.18383e-05	6.7111e-05	6.18302e-05	5.4508e-05	7.35313e-05	7.96292e-05	6.09753e-05	6.79313e-05	7.34596e-05	7.98145e-05	6.03378e-05	1.18155e-09	6.51543e-05	6.17196e-05	7.43209e-05	5.25743e-05	6.00841e-05	5.5504e-05	6.27099e-05	6.21607e-05
105	SM(d14:0/20:0)	0.982764	705.58	397.931	4.57478e-09	0.00228482	0.00235102	0.00262489	0.00208303	0.00228953	0.00212478	0.00229367	0.0023825	0.00198473	0.00223546	0.00194087	0.00208187	0.00206512	0.00209775	0.00219705	0.00224101	0.00225403	0.00223308	0.00235088	0.00210581	0.00284052	0.00214694	0.00223024	0.0021024	0.00226348	0.00240172	0.00231594	0.00242804	0.00229433	0.00213627	0.00226393	0.00191512	0.00231847	0.00234689	0.00224623	1.18155e-09	0.00239937	0.00208588	0.00228054	0.00210878	0.00215626	0.0021591	0.00196523	0.00234415
134	SM(d14:0/20:1)	0.978236	703.572	376.111	0.000329159	0.000175395	0.000151401	0.000138819	0.000121575	0.00014337	0.000111484	0.000107544	0.000129462	7.92956e-05	0.000140586	0.000107286	0.000116916	0.00013808	0.000145521	0.000130741	0.000117491	0.000152847	0.000104435	0.000165347	0.000140338	0.000199033	0.000133563	0.00015721	0.00012514	0.000159263	0.000172062	7.78385e-05	0.000123836	0.000165008	0.000116921	8.83822e-05	0.000196752	9.91616e-05	0.000185914	0.000143968	0.000155277	8.26172e-05	0.000104171	0.000111036	9.52885e-05	0.000134622	0.000166617	0.00019407	0.000121122
103	SM(d14:0/20:2)	0.983923	701.577	402.724	2.70014e-05	3.33938e-06	8.55815e-06	1.28133e-09	4.84067e-06	6.2511e-06	6.72404e-06	6.41875e-06	3.99529e-06	4.51503e-06	2.56079e-06	1.23674e-05	1.06578e-05	4.72977e-06	2.93454e-06	9.57327e-06	5.34317e-06	5.50078e-06	8.40313e-06	1.74389e-06	6.77298e-06	8.93981e-06	3.04549e-06	4.07656e-06	3.29963e-06	5.81186e-06	5.69169e-06	2.89827e-06	4.74806e-06	5.95086e-06	4.00386e-06	2.01518e-06	4.0517e-06	2.03625e-06	2.28042e-06	2.01627e-06	3.46372e-06	4.0983e-06	4.77366e-06	1.81728e-09	5.33709e-06	3.92702e-06	6.06175e-06	5.27317e-06	2.42446e-06
150	SM(d14:0/21:1)	0.974579	717.582	383.058	4.57478e-09	1.78285e-06	4.63831e-07	1.55006e-06	1.47131e-09	7.99489e-07	9.14916e-07	1.11967e-06	1.32435e-06	7.32825e-07	1.58263e-06	1.46099e-06	1.11119e-06	1.10258e-06	6.86205e-07	1.80641e-06	9.44589e-07	9.88372e-07	1.39398e-06	5.54383e-07	1.01627e-06	1.30829e-09	5.37339e-07	1.17715e-06	1.14796e-06	1.28533e-09	1.9209e-06	4.53635e-07	1.42323e-06	8.51345e-07	6.30925e-07	4.0418e-07	1.73529e-06	1.26839e-06	7.64084e-07	9.4246e-07	1.18155e-09	1.16124e-06	1.22317e-06	1.81728e-09	2.01931e-07	7.92441e-07	8.76544e-07	1.3622e-06	1.36601e-06
162	SM(d14:0/22:0)	0.969544	733.498	499.594	4.67631e-06	1.84527e-06	3.37045e-06	2.83523e-06	2.0696e-06	1.41709e-06	1.50838e-06	2.66554e-06	1.65494e-06	1.39495e-06	3.19375e-06	5.72347e-06	3.45036e-06	1.06323e-06	3.18229e-06	2.81838e-06	1.93985e-06	3.0874e-06	1.80496e-06	9.76239e-07	2.53389e-06	3.25908e-06	1.86027e-06	2.61915e-07	1.83624e-06	2.80634e-06	1.63854e-06	7.70499e-07	1.52766e-06	1.96368e-06	7.78637e-07	7.82352e-07	1.31646e-06	5.1345e-07	1.0651e-06	1.42899e-06	1.18155e-09	5.2795e-07	9.71462e-07	4.45743e-06	1.94375e-06	1.48555e-06	1.68919e-06	1.51916e-06	1.56771e-06
130	SM(d14:0/22:1)	0.978691	731.595	408.548	4.57478e-09	3.7755e-05	3.99628e-05	5.11411e-05	4.34045e-05	4.69144e-05	4.27439e-05	4.31853e-05	4.33355e-05	4.31359e-05	3.7928e-05	5.26951e-05	4.08904e-05	5.20748e-05	3.76475e-05	4.72459e-05	5.73452e-05	2.99853e-05	4.41031e-05	4.02549e-05	4.15877e-05	5.54483e-05	3.72875e-05	4.20545e-05	4.87467e-05	3.30132e-05	3.81713e-05	4.29221e-05	4.74623e-05	4.44449e-05	3.98991e-05	3.05602e-05	5.35969e-05	3.66044e-05	3.36132e-05	4.70049e-05	1.18155e-09	5.81637e-05	4.93418e-05	5.91212e-05	3.449e-05	4.15974e-05	4.52227e-05	4.81286e-05	4.05209e-05
141	SM(d14:0/22:2)	0.975875	729.59	408.551	4.57478e-09	0.000355325	0.000417946	0.000484411	0.000421816	0.000435159	0.000447097	0.000423229	0.00041388	0.000398762	0.000379876	0.000459977	0.00040183	0.00042656	0.000383393	0.000447866	0.000518916	0.000334524	0.000485739	0.000415125	0.000402572	0.000485029	0.000359537	0.000415674	0.00044124	0.000341906	0.000416576	0.000376624	0.000461211	0.000435752	0.000375064	0.000322863	0.000524767	0.000358406	0.000330389	0.000472389	1.18155e-09	0.000546826	0.000445237	0.000532544	0.00035196	0.0003997	0.00043118	0.000397881	0.000403889
727	SM(d14:0/24:2)	0.748074	801.629	494.219	6.66351e-06	1.742e-06	1.53138e-06	3.26042e-06	1.50405e-06	2.27436e-06	2.01611e-06	1.99615e-06	1.57112e-06	1.93216e-06	1.0997e-06	2.4216e-06	2.73403e-06	2.06553e-06	1.18464e-06	2.30186e-06	1.92565e-06	1.65321e-06	1.97627e-06	1.33318e-06	2.15935e-06	3.35927e-06	1.12318e-06	1.81044e-06	1.99991e-06	2.21872e-06	1.45444e-06	2.80628e-06	1.8006e-06	2.55324e-06	1.34801e-06	1.2463e-06	1.46774e-06	6.4809e-07	9.32458e-07	1.91691e-06	1.81052e-06	2.30079e-06	2.19636e-06	3.51649e-06	1.73795e-06	1.91238e-06	1.97882e-06	1.91419e-06	1.97598e-06
755	SM(d14:0/26:2)	0.716161	829.643	514.929	4.57478e-09	0.000479465	0.000470026	0.00043105	0.000529334	0.000473776	0.000494144	0.000532117	0.000514056	0.000430973	0.000453867	0.000454189	0.000444523	0.000455521	0.000368607	0.000405567	0.000419067	0.000378206	0.000475732	0.00057092	0.000439057	0.000544595	0.000438897	0.000523279	0.000513887	0.000433163	0.000394111	0.000439869	0.000569361	0.000479002	0.000443185	0.000419033	0.000566522	0.000538236	0.000451385	0.000502067	0.000539134	0.000525238	0.0004366	0.000441779	0.000340991	0.000477017	0.000453928	0.000457542	0.000450801
691	SM(d14:0/28:2)	0.762295	857.676	563.779	0.00174555	0.00118089	0.00103258	0.0011864	0.0010498	0.00101126	0.00103343	0.0012624	0.00134195	0.00100719	0.00116372	0.000954271	0.00132446	0.00117724	0.00103708	0.00119038	0.00116412	0.00101883	0.00107846	0.0014311	0.00116956	0.00135392	0.000986006	0.00137654	0.00110322	0.00110031	0.00102074	0.00109909	0.00130345	0.000941497	0.00115309	0.000963393	0.00136299	1.21068e-09	0.00118305	0.000957071	0.00138463	0.00139194	0.00104128	0.000810892	0.000906667	0.00107199	0.00104804	0.00114342	0.00118155
677	SM(d14:0/30:2)	0.781939	885.704	609.721	4.57478e-09	5.23822e-05	2.74281e-05	4.37852e-05	4.41831e-05	3.48421e-05	4.7392e-05	3.57089e-05	3.64934e-05	3.51417e-05	3.78227e-05	4.31703e-05	2.75969e-05	3.2365e-05	4.04163e-05	4.13785e-05	5.14476e-05	4.0068e-05	3.9121e-05	4.66695e-05	3.78709e-05	5.54382e-05	3.77552e-05	3.39631e-05	3.76867e-05	3.82837e-05	2.50275e-05	5.50699e-05	4.57329e-05	3.53989e-05	4.2377e-05	3.86229e-05	4.11339e-05	3.05491e-05	3.91558e-05	4.45264e-05	1.18155e-09	1.27249e-09	4.38959e-05	2.86201e-05	1.32969e-09	3.3662e-05	3.82337e-05	4.87062e-05	3.7744e-05
741	SM(d14:1/20:0)	0.73258	747.564	398.53	4.57478e-09	0.00327234	0.00320433	0.00355176	0.00310871	0.00315663	0.00303907	0.00294339	0.00290784	0.00256342	0.00317489	0.00267474	0.00277529	0.00282742	0.00286168	0.00295136	0.00289121	0.00319973	0.00290624	0.00294403	0.0028477	0.00372664	0.00289885	0.00284339	0.00299078	0.00299845	0.00323358	0.00288343	0.0029627	0.00311069	0.00292183	0.00285439	0.00261906	0.00286881	0.00310547	0.00294295	0.0033626	0.00317764	0.0027367	0.00309837	0.00273138	0.00300338	0.00265467	0.00285789	0.0028678
135	SM(d14:1/21:1)	0.977891	715.51	381.382	4.57478e-09	3.55369e-05	2.24331e-05	3.46617e-05	4.87848e-05	3.77205e-05	3.03456e-05	3.18146e-05	3.40095e-05	2.65336e-05	2.66761e-05	1.7411e-05	2.9553e-05	2.89913e-05	2.60893e-05	4.2196e-05	3.35636e-05	2.57158e-05	3.34085e-05	2.82191e-05	2.96834e-05	1.30829e-09	1.40393e-09	4.20203e-05	2.63194e-05	1.28533e-09	3.94879e-05	2.47105e-05	3.42956e-05	3.35183e-05	3.05197e-05	2.81692e-05	4.25162e-05	3.25011e-05	3.26906e-05	2.61935e-05	1.18155e-09	2.91045e-05	3.07445e-05	3.79271e-05	2.23741e-05	2.56549e-05	3.21061e-05	3.15965e-05	3.15799e-05
144	SM(d14:1/22:0)	0.975237	731.605	453.998	0.00416628	0.00187839	0.00157401	0.00252179	0.00210857	0.00229676	0.00174847	0.00153257	0.00260735	0.00225221	0.00149051	0.0017879	0.00127503	0.00210537	0.00133555	0.00134756	0.00214986	0.00160265	0.00181341	0.0015599	0.00195771	1.30829e-09	0.00205654	0.00155979	0.00213207	0.00175075	0.0023792	0.00178668	0.0019633	0.00218591	0.00129349	0.00185734	0.00188443	0.00140855	0.00133944	0.0021678	1.18155e-09	0.00242335	0.00197529	0.00288262	0.00142936	0.0017238	0.00188218	0.00180939	0.00186046
45	SM(d14:1/26:2)	0.99858	783.607	507.111	4.90806e-05	2.46298e-05	2.1794e-05	3.70513e-05	3.08361e-05	2.46248e-05	1.94659e-05	1.7291e-05	2.77699e-05	3.01399e-05	1.69086e-05	2.38646e-05	1.30209e-05	2.84658e-05	1.91245e-05	1.27563e-05	2.73739e-05	2.33494e-05	1.79724e-05	1.78372e-05	2.41678e-05	4.82375e-05	3.78071e-05	1.89456e-05	4.54202e-05	2.36526e-05	3.65076e-05	2.42461e-05	2.70614e-05	3.15942e-05	1.48404e-05	2.44305e-05	2.88621e-05	1.76557e-05	2.60382e-05	3.28804e-05	3.04483e-05	3.80824e-05	2.48677e-05	4.23948e-05	2.11029e-05	2.97538e-05	2.54358e-05	2.44831e-05	2.33058e-05
114	SM(d14:1/28:2)	0.98247	811.667	512.673	0.00161369	0.0022828	0.00209647	0.0023869	0.00174987	0.00202091	0.00183184	0.00205453	0.00204229	0.00230894	0.00240606	0.00128813	0.00166757	0.0023542	0.00198459	0.00190778	0.00187972	0.00153242	0.0019807	0.00264846	0.00200189	0.00267653	0.00185224	0.00171915	0.00169349	0.00201776	0.00173272	0.0018535	0.00225654	0.00161189	0.00205712	0.00176376	0.00182378	0.00240979	0.0022573	0.00150085	0.00298313	0.00249412	0.00185545	0.00145013	0.00142994	0.00197196	0.00198872	0.0020865	0.00206221
674	SM(d14:1/30:2)	0.785123	883.689	560.439	4.57478e-09	8.42303e-05	6.75919e-05	0.000104125	6.58026e-05	8.58976e-05	7.60185e-05	6.63577e-05	5.69822e-05	8.55309e-05	8.35842e-05	4.98517e-05	5.66237e-05	8.63993e-05	8.15887e-05	6.63192e-05	9.09545e-05	5.27509e-05	8.10432e-05	7.92701e-05	7.10464e-05	0.000101923	7.13403e-05	4.56687e-05	6.92135e-05	6.22921e-05	8.4203e-05	7.42695e-05	7.84252e-05	5.4397e-05	7.90482e-05	6.16113e-05	6.47241e-05	7.22381e-05	9.23412e-05	6.34516e-05	0.000110737	0.000112503	7.12246e-05	4.97453e-05	6.43856e-05	7.41871e-05	7.10857e-05	7.34316e-05	8.11931e-05
763	SM(d14:2/28:2)	0.708241	853.661	500.305	1.25614e-05	6.94492e-06	6.17034e-06	7.86441e-06	4.75197e-06	7.00016e-06	6.43481e-06	8.26083e-06	4.24531e-06	7.00736e-06	8.2852e-06	7.22925e-06	8.08606e-06	5.21222e-06	6.17685e-06	6.98381e-06	7.935e-06	6.76573e-06	7.3746e-06	4.02644e-06	6.96583e-06	7.03886e-06	6.08307e-06	6.89339e-06	1.43359e-09	6.42973e-06	7.00607e-06	5.06845e-06	5.94195e-06	6.53792e-06	6.91802e-06	1.26938e-09	6.42774e-06	4.34221e-06	4.92879e-06	5.88729e-06	5.55578e-06	7.64429e-06	6.99329e-06	7.73074e-06	6.85242e-06	5.71414e-06	5.91015e-06	6.20393e-06	6.38641e-06
71	SM(d14:2/30:2)	0.992464	837.673	549.159	0.000299436	0.000219489	0.000268556	0.000182239	0.00012685	0.00012471	0.000149353	0.000180624	0.000188949	0.000169172	0.000158801	0.000171869	0.000159587	0.000168688	0.000184953	0.000164573	0.000134605	0.000200356	0.000154755	0.000179291	0.000179343	0.000147688	0.000174265	0.000140722	0.00027312	0.000155056	0.000132884	0.000108376	0.000135863	0.000145728	1.19971e-09	0.000131631	0.000251754	0.000227766	0.000194995	0.00011909	0.000137238	0.000137011	0.000127162	0.000139524	0.000169807	0.000152484	0.000163195	0.000283373	0.000149022
738	SM(d15:0/18:1)	0.738155	733.551	372.198	4.57478e-09	0.000104709	9.0838e-05	9.81522e-05	9.49314e-05	9.65781e-05	8.7196e-05	9.57425e-05	8.6298e-05	7.04992e-05	9.18699e-05	8.99119e-05	0.000116328	8.41401e-05	8.52744e-05	0.000121064	9.03658e-05	7.82415e-05	9.51828e-05	8.07085e-05	8.79018e-05	1.30829e-09	8.80591e-05	0.000100189	8.60194e-05	0.000114634	0.000100982	9.1989e-05	7.80699e-05	9.82252e-05	8.3553e-05	9.0704e-05	0.000105409	0.000100077	0.000106088	9.43387e-05	1.18155e-09	0.00010265	8.55463e-05	9.90558e-05	6.92661e-05	8.47428e-05	8.50225e-05	9.30887e-05	9.6251e-05
703	SM(d15:0/26:2)	0.755649	843.625	504.238	3.10173e-06	7.76851e-07	1.46536e-09	1.99843e-06	2.21828e-06	1.62566e-06	4.13075e-06	2.5124e-06	1.14706e-06	1.75766e-06	1.228e-09	1.01442e-06	2.14341e-06	9.26034e-07	5.51602e-07	1.09685e-06	1.6612e-06	2.49186e-06	1.64214e-06	2.2513e-06	1.65252e-06	1.03906e-06	1.10051e-06	1.22256e-09	2.15194e-06	1.58591e-06	1.15392e-06	2.64854e-06	1.87907e-06	2.94517e-06	2.48902e-06	9.12193e-07	2.49901e-06	2.98103e-06	1.50758e-06	1.39156e-06	4.29549e-06	2.6153e-06	3.76425e-06	1.80177e-06	1.34605e-06	2.00543e-06	1.10334e-06	2.13629e-06	2.67104e-06
640	SM(d15:0/28:2)	0.813394	871.692	578.28	5.05254e-05	3.94767e-05	5.65559e-05	6.476e-05	2.83142e-05	5.54389e-05	2.96803e-05	3.01542e-05	6.56423e-05	3.04281e-05	3.14688e-05	2.84143e-05	6.41009e-05	3.38723e-05	6.87088e-05	6.53278e-05	2.56977e-05	2.69567e-05	5.53034e-05	2.92034e-05	4.40015e-05	4.26605e-05	5.88769e-05	6.04863e-05	3.31138e-05	3.11517e-05	4.41824e-05	2.49731e-05	3.44111e-05	2.49808e-05	4.34206e-05	2.63065e-05	5.46951e-05	4.52025e-05	6.16147e-05	4.21701e-05	4.10566e-05	4.24695e-05	3.01555e-05	2.24598e-05	2.51353e-05	3.94761e-05	2.79626e-05	3.13199e-05	5.80362e-05
710	SM(d15:1/20:0)	0.753232	761.579	427.27	0.000122083	5.69761e-05	5.2329e-05	6.11734e-05	6.88624e-05	6.66103e-05	4.73728e-05	5.16153e-05	5.96226e-05	4.37036e-05	4.77617e-05	5.65002e-05	4.839e-05	4.61662e-05	4.90041e-05	6.86851e-05	5.19483e-05	4.36142e-05	4.88766e-05	4.14056e-05	5.6635e-05	1.30829e-09	4.97576e-05	5.15921e-05	5.29688e-05	6.4265e-05	6.71293e-05	4.09642e-05	4.70944e-05	5.95902e-05	4.54793e-05	4.68282e-05	5.25581e-05	4.53737e-05	5.65163e-05	5.32006e-05	1.18155e-09	4.46535e-05	5.33898e-05	5.491e-05	3.57361e-05	4.61005e-05	4.90554e-05	5.00029e-05	4.82075e-05
750	SM(d16:0/18:1)	0.721477	747.516	423.474	4.57478e-09	0.000672108	0.000667565	0.000396496	0.000528417	0.000764633	0.000863918	0.000589174	0.000891084	0.000746795	0.00066967	0.000823673	0.000614107	0.000814671	0.00066496	0.000615082	0.000896428	0.000690626	0.000664479	0.000685767	0.000662983	0.000989087	0.000740774	0.000906456	0.000799175	0.000622832	0.000706541	0.000900022	0.00083945	0.00080156	0.000868007	0.000897149	0.000830474	0.000706254	0.000888907	0.000799595	0.00101909	0.000774259	0.000911844	0.000603202	0.000814669	0.000820967	0.000686321	0.000725749	0.000715641
759	SM(d18:0/18:1)	0.711397	775.546	469.95	0.000514714	0.000428974	0.000424764	0.000288843	0.000311558	0.000585052	0.000557831	0.000412646	0.000683295	0.000559274	0.000522941	0.00061189	0.000213077	0.000552465	0.000432408	0.000616963	0.000593438	0.000428348	0.000514396	0.000570853	0.000491186	0.000782552	0.000521169	0.000635878	0.000429599	0.00042204	0.000509867	0.000491459	0.000502569	0.000518214	0.000559246	0.000626349	0.00052242	0.000632304	0.00051973	0.000545402	0.000660435	0.000521832	0.000685784	0.000499106	0.000431545	0.000550875	0.000499065	0.000522761	0.000525768
756	SM(d28:0/12:1)	0.715006	831.677	723.121	4.57478e-09	4.80976e-05	1.46536e-09	3.28313e-05	4.17343e-05	1.35098e-09	4.47418e-05	1.33023e-09	4.39911e-05	2.99415e-05	3.57391e-05	3.74655e-05	3.44805e-05	3.59403e-05	5.19536e-05	4.71434e-05	4.88966e-05	5.89448e-05	5.38525e-05	1.17511e-09	3.22882e-05	4.83925e-05	5.94652e-05	4.65058e-05	4.87061e-05	3.75958e-05	5.56511e-05	4.12537e-05	4.32939e-05	3.14673e-05	3.49993e-05	4.15024e-05	1.47183e-09	3.34526e-05	1.29905e-09	4.08936e-05	3.92151e-05	3.53014e-05	3.29156e-05	4.30923e-05	3.67096e-05	3.75208e-05	3.44764e-05	3.40971e-05	2.89074e-05
697	SM(d29:0/12:1)	0.758536	845.673	581.204	4.57478e-09	0.000578755	0.000447145	0.00054877	0.000649613	0.000545071	0.000591057	0.000688852	0.000614884	0.000627804	0.000865919	0.000501698	0.000618257	0.000651465	0.000539702	0.00058068	0.000463947	0.000406485	0.000567903	0.000753652	0.000562083	0.000767472	0.000621658	0.000746054	0.00054134	0.000496407	0.000503336	0.000559026	0.000746851	0.000451805	0.00067252	0.000485003	0.000550739	0.00053717	0.000643352	0.000493674	0.000681008	0.000684405	0.000742498	0.000423999	0.000392244	0.000587028	0.000567395	0.000612795	0.000600596
631	SM(d30:0/12:1)	0.819594	859.689	713.505	4.57478e-09	1.56823e-05	1.46536e-09	1.2394e-05	9.45404e-06	1.39007e-05	1.37897e-05	1.67178e-05	9.64479e-06	1.3547e-05	1.64125e-05	9.64554e-06	1.47228e-05	1.68651e-05	1.45805e-05	1.27075e-09	1.44794e-05	1.61961e-05	1.31556e-05	1.76422e-05	1.19419e-05	1.23018e-05	1.4372e-05	1.49271e-05	1.60517e-05	1.04587e-05	1.59302e-05	1.25427e-05	1.4834e-05	2.18312e-05	1.06278e-05	1.18549e-05	1.54601e-05	1.49135e-05	1.77924e-05	1.74243e-05	1.58544e-05	1.75174e-05	1.60674e-05	1.32511e-05	1.19113e-05	1.47962e-05	2.68809e-05	1.31666e-05	1.33931e-05
629	SM(d30:1/12:1)	0.82145	857.676	633.054	2.43364e-05	2.04936e-05	1.5498e-05	1.38602e-05	1.47131e-09	1.35098e-09	1.38395e-05	1.33023e-09	1.60429e-05	2.18829e-05	1.63305e-05	1.44564e-05	1.48619e-05	2.42784e-05	1.56835e-05	1.43754e-05	1.7601e-05	1.49243e-05	1.83601e-05	1.98418e-05	1.48336e-05	1.55711e-05	1.48212e-05	1.48928e-05	1.72568e-05	1.59393e-05	1.55824e-05	1.68947e-05	2.10001e-05	1.38215e-05	1.58692e-05	1.20554e-05	1.32313e-05	2.77719e-05	2.45082e-05	1.41986e-05	1.96261e-05	1.48293e-05	1.44246e-05	1.31852e-05	1.28115e-05	1.64146e-05	1.62233e-05	1.30821e-05	1.74246e-05
621	SQDG(12:0/22:3)	0.826261	815.542	352.619	1.13717e-05	7.78789e-07	1.22887e-06	4.65075e-07	1.11479e-06	3.08989e-07	7.02196e-07	1.33023e-09	1.18992e-09	4.78488e-07	1.40143e-06	6.78002e-07	1.39206e-06	1.13128e-09	6.55909e-07	6.84451e-07	5.06608e-07	1.09845e-06	6.17666e-07	1.17511e-09	1.17442e-06	9.16147e-07	1.40393e-09	6.27054e-07	1.31354e-06	1.28533e-09	5.05269e-07	7.20854e-07	4.285e-07	1.34107e-09	2.87136e-07	1.26938e-09	1.47183e-09	8.19085e-07	3.22608e-07	8.00917e-07	8.04454e-07	4.54256e-07	6.79131e-07	1.15171e-06	9.87399e-07	5.41241e-07	1.15442e-05	1.08624e-06	1.21112e-05
617	SQDG(13:1/26:4)	0.826261	881.524	522.474	3.41811e-06	7.98859e-07	1.31583e-06	1.22646e-06	8.37936e-07	1.62773e-06	8.97161e-07	9.12798e-07	1.23636e-06	5.06224e-07	9.85249e-07	1.87768e-06	5.66289e-07	5.91188e-07	1.01165e-06	1.6308e-06	7.20454e-07	7.83464e-07	7.04765e-07	1.24344e-06	1.14462e-06	1.91141e-06	1.04365e-06	1.25992e-06	6.61453e-07	1.13763e-06	1.54221e-06	9.38538e-07	6.65011e-07	1.63078e-06	1.05804e-06	7.13326e-07	1.10239e-06	9.23181e-07	8.06534e-07	1.59393e-06	9.0974e-07	1.15822e-06	4.97541e-07	1.18066e-06	9.3864e-07	1.08364e-06	7.7743e-07	8.75653e-07	9.53084e-07
619	SQDG(14:0/22:3)	0.826261	843.548	414.61	4.57478e-09	1.08376e-05	1.43391e-05	1.11152e-05	1.37176e-05	1.39421e-05	1.33447e-05	1.19642e-05	1.23235e-05	1.21216e-05	1.07869e-05	1.52542e-05	1.18262e-05	1.04757e-05	1.24144e-05	1.02168e-05	1.27615e-05	1.26813e-05	1.20188e-05	1.10267e-05	1.16586e-05	1.08403e-05	1.30969e-05	1.28593e-05	1.28366e-05	1.21091e-05	1.25982e-05	1.20108e-05	1.22019e-05	1.29214e-05	1.12502e-05	1.14465e-05	1.35771e-05	1.16405e-05	1.1742e-05	1.2538e-05	9.62917e-06	1.06836e-05	1.01034e-05	1.49933e-05	1.1465e-05	1.20271e-05	1.06424e-05	1.12091e-05	1.19906e-05
620	SQDG(14:1/24:2)	0.826261	871.569	375.115	2.5887e-06	2.53896e-06	2.09301e-06	2.8913e-06	2.42251e-06	3.37111e-06	5.55424e-06	2.34864e-06	2.93919e-06	3.08403e-06	4.45109e-06	1.56369e-06	1.69048e-06	2.52849e-06	2.12835e-06	4.32032e-06	2.17196e-06	2.12336e-06	2.55988e-06	3.95944e-06	2.86644e-06	3.39228e-06	2.5237e-06	1.22256e-09	2.45114e-07	2.52651e-06	1.77678e-06	3.81425e-06	2.96673e-06	4.29177e-06	3.60888e-06	3.15992e-06	4.61883e-06	5.12444e-06	3.24475e-06	2.13935e-06	1.18155e-09	5.08079e-06	2.89761e-06	1.15726e-06	1.26519e-06	2.69183e-06	3.20151e-06	3.01003e-06	3.41511e-06
556	SQDG(15:0/19:1)	0.869007	819.561	320.891	7.52216e-06	2.91786e-06	2.10916e-06	2.86775e-06	3.42347e-06	2.18103e-06	1.10076e-06	2.34235e-06	1.34648e-06	1.36518e-06	1.228e-09	1.50405e-06	2.80807e-06	2.02768e-06	1.32527e-09	3.15734e-06	2.73727e-06	1.98129e-06	1.64085e-06	2.44062e-06	2.2738e-06	2.96504e-06	1.71866e-06	2.40551e-06	1.78833e-06	3.0576e-06	2.40661e-06	2.31597e-06	2.30348e-06	1.16389e-06	2.77697e-06	9.9915e-07	1.29786e-06	3.26388e-06	1.98498e-06	2.14408e-06	1.71464e-06	1.26115e-06	1.42248e-06	1.97636e-06	2.62082e-06	2.07937e-06	1.70569e-06	4.11454e-06	3.98867e-06
403	SQDG(16:0/16:0)	0.890012	793.503	284.896	1.89073e-06	2.89612e-06	2.59992e-06	2.25817e-06	1.93427e-06	2.3147e-06	4.203e-06	2.90372e-06	4.04016e-06	3.08488e-06	2.62471e-06	6.71938e-06	2.07304e-06	5.07398e-06	4.15812e-06	4.33603e-06	3.45475e-06	1.91198e-06	2.69289e-06	4.91705e-06	3.30438e-06	4.55663e-06	2.25677e-06	2.27246e-06	3.55999e-06	4.93851e-06	2.14399e-06	5.06262e-06	2.20682e-06	2.57706e-06	4.07461e-06	4.64073e-06	3.78318e-06	4.18787e-06	3.42558e-06	3.11561e-06	6.55915e-06	4.49776e-06	2.93973e-06	2.30658e-06	4.09016e-06	3.65979e-06	4.11869e-06	2.90975e-06	2.89537e-06
424	SQDG(16:0/18:1)	0.882346	819.517	275.425	3.55457e-06	8.93754e-06	2.82587e-05	2.2318e-05	1.61407e-06	1.75715e-05	1.90862e-05	3.11499e-06	4.19957e-06	1.91685e-05	1.66626e-05	2.60471e-06	3.96646e-06	2.84039e-06	2.37636e-05	2.34432e-06	1.96538e-05	1.78916e-05	3.1256e-06	1.17511e-09	1.10339e-05	8.9295e-06	1.26515e-05	4.23744e-06	3.51018e-06	2.52477e-06	9.29928e-06	3.24709e-06	1.92182e-05	1.44093e-05	1.97315e-05	3.35613e-06	2.2328e-05	3.8822e-06	4.59681e-06	5.65512e-06	2.51056e-05	2.44369e-05	2.6919e-06	6.55979e-06	7.08765e-07	9.854e-06	1.33852e-05	2.22158e-05	1.29443e-05
414	SQDG(16:0/20:2)	0.885365	845.574	328.802	6.85035e-06	6.60544e-07	7.91797e-07	3.87286e-07	8.49237e-07	1.05274e-06	1.97064e-06	7.37721e-07	1.00743e-06	1.27771e-06	1.0752e-06	5.46503e-07	4.91013e-07	9.78351e-07	9.37947e-07	7.89e-07	6.04801e-07	6.78081e-07	1.01471e-06	1.57787e-06	1.21395e-06	1.04123e-06	1.05311e-06	2.3097e-06	5.14378e-07	8.18981e-07	1.46205e-09	1.58872e-06	8.66042e-07	1.40518e-06	1.39584e-06	1.1384e-06	1.29828e-06	1.68278e-06	1.62327e-06	6.36547e-07	2.46994e-06	2.06408e-06	8.43738e-07	3.08497e-06	8.15258e-07	1.3326e-06	1.04986e-06	1.10388e-06	1.04085e-06
555	SQDG(16:0/20:3)	0.869631	843.554	327.883	2.52431e-06	6.34221e-06	6.04504e-06	4.25887e-06	8.93729e-06	9.02499e-06	1.37009e-05	1.20177e-05	7.16487e-06	9.0928e-06	1.17205e-05	4.77368e-06	1.94249e-05	7.43564e-06	8.59548e-06	1.19513e-05	4.97661e-06	7.44052e-06	7.7193e-06	1.22904e-05	8.77186e-06	1.03075e-05	7.93352e-06	1.54832e-05	4.19069e-06	1.28533e-09	8.39538e-06	1.15467e-05	8.38221e-06	1.03669e-05	1.03992e-05	8.92871e-06	9.53997e-06	1.20818e-05	1.24692e-05	5.34575e-06	1.67533e-05	1.4426e-05	6.90503e-06	8.44657e-06	6.48203e-06	9.41925e-06	9.5077e-06	8.48283e-06	8.95247e-06
598	SQDG(16:0/22:4)	0.841666	869.534	277.204	2.018e-06	3.2258e-06	6.9942e-06	1.08694e-06	6.14076e-06	3.84951e-06	6.65231e-06	4.74399e-06	7.91149e-06	5.62777e-06	3.80902e-06	5.42667e-06	4.73026e-07	5.91665e-06	6.30415e-06	3.10548e-06	4.89393e-06	4.79145e-06	3.72588e-06	1.17511e-09	4.33491e-06	4.19797e-06	3.59734e-06	7.25812e-06	4.09718e-06	4.90333e-06	3.82541e-06	7.38319e-06	5.35985e-06	5.15176e-06	4.41262e-06	5.41478e-06	1.02348e-05	4.91417e-06	2.98197e-06	3.83289e-06	5.25276e-06	6.15579e-06	4.05701e-06	2.75321e-06	4.83322e-06	5.03087e-06	4.60456e-06	5.60101e-06	5.25624e-06
542	SQDG(16:0/22:5)	0.874523	867.516	261.435	7.21347e-06	9.06726e-06	1.54903e-05	7.00276e-06	1.24803e-05	6.49041e-06	1.64147e-05	1.21665e-05	2.30378e-05	1.26313e-05	1.219e-05	1.04421e-05	7.18939e-06	1.49046e-05	1.91086e-05	1.13647e-05	1.85174e-05	1.37753e-05	9.16834e-06	1.17511e-09	1.19328e-05	1.11866e-05	1.0919e-05	1.67171e-05	6.75731e-06	1.1243e-05	1.39683e-05	1.5641e-05	1.40039e-05	1.40567e-05	1.47997e-05	1.06596e-05	2.25935e-05	9.33846e-06	1.20843e-05	9.74849e-06	1.67038e-05	1.8564e-05	1.35442e-05	8.72826e-06	1.18987e-05	1.31578e-05	1.27504e-05	1.44556e-05	1.36441e-05
622	SQDG(16:1/22:3)	0.826261	869.532	293.768	1.79572e-06	1.69509e-06	4.80821e-06	4.51954e-06	4.64448e-06	2.7515e-06	6.61241e-06	2.32578e-06	5.02118e-06	4.47477e-06	3.28415e-06	1.40569e-06	5.03539e-06	3.95646e-06	5.92349e-06	2.78438e-06	6.34412e-06	7.48744e-06	3.7511e-06	1.17511e-09	3.9311e-06	2.84742e-06	2.58408e-06	2.84489e-06	1.8878e-06	2.82414e-06	4.37825e-06	4.74838e-06	3.74242e-06	5.53697e-06	5.16528e-06	1.7192e-06	7.96821e-06	3.38346e-06	2.84907e-06	2.36524e-06	4.37815e-06	4.67786e-06	3.20687e-06	3.33708e-06	2.35313e-06	3.63989e-06	3.61072e-06	4.10328e-06	3.8535e-06
623	SQDG(16:1/22:5)	0.826261	865.543	241.62	2.6976e-06	1.72495e-06	2.15097e-07	1.86962e-06	8.65934e-07	1.34248e-06	5.05945e-07	2.35264e-06	7.93395e-07	1.03037e-07	1.88458e-06	3.32578e-07	1.23134e-06	7.39429e-07	1.46109e-06	1.82114e-06	7.45844e-07	7.31134e-07	3.16894e-07	1.4491e-06	1.15919e-06	1.18669e-06	2.04642e-06	1.05313e-06	8.05872e-07	1.19724e-06	1.31427e-06	3.88819e-07	1.66521e-06	2.40627e-07	6.89353e-07	4.50305e-07	1.32573e-06	7.47249e-07	1.83648e-06	8.91698e-07	6.65699e-07	2.30503e-07	8.24041e-07	5.05094e-07	7.97462e-07	9.43094e-07	9.02346e-07	1.09443e-06	9.53569e-07
402	SQDG(17:0/17:0)	0.890012	821.516	344.718	2.61104e-08	1.30617e-07	2.70408e-07	5.02411e-08	2.36562e-07	1.85929e-07	3.25758e-07	2.81463e-07	5.08581e-07	2.67073e-07	1.31802e-07	1.13421e-07	5.74105e-08	1.31023e-07	3.60761e-07	1.27075e-09	2.5524e-08	6.12824e-08	1.62355e-07	1.38802e-07	1.7332e-07	1.30829e-09	1.94946e-07	1.22256e-09	3.21938e-07	1.91665e-07	2.09953e-07	2.64588e-07	2.52548e-07	2.51918e-07	1.19971e-09	2.22361e-07	1.71124e-07	1.90532e-07	1.29905e-09	2.30462e-07	1.18155e-09	4.65388e-07	3.90567e-07	6.16005e-08	1.52242e-07	1.78902e-07	2.40968e-07	3.43487e-07	2.8599e-07
618	SQDG(17:1/22:6)	0.826261	877.5	432.12	6.88978e-06	3.79791e-06	2.38595e-06	3.30955e-06	3.48021e-06	1.98725e-06	2.24562e-06	3.04404e-06	1.77407e-06	2.6858e-06	1.70666e-06	2.22933e-06	4.57126e-06	3.1244e-06	2.99192e-06	2.82406e-06	2.22675e-06	2.14779e-06	3.98423e-06	3.11718e-06	3.02619e-06	2.11515e-06	4.18918e-06	2.0925e-06	3.89373e-06	1.96709e-06	2.61679e-06	2.44424e-06	2.91563e-06	2.59254e-06	1.36388e-06	3.00818e-06	3.37438e-06	2.14295e-06	3.26869e-06	2.52932e-06	1.99638e-06	2.96237e-06	2.52452e-06	2.27786e-06	3.24184e-06	2.67586e-06	2.40375e-06	2.78792e-06	2.99775e-06
806	SQDG(18:0/16:1)	0.638804	838.55	367.018	1.66306e-05	4.83465e-05	4.1679e-05	5.49701e-05	3.63118e-05	4.89664e-05	5.9972e-05	6.19308e-05	7.19236e-05	5.56258e-05	8.74621e-05	3.65714e-05	4.59606e-05	7.31525e-05	7.00376e-05	5.19137e-05	7.91136e-05	4.20928e-05	6.7003e-05	6.42035e-05	5.56934e-05	8.50798e-05	4.35884e-05	1.22256e-09	5.00796e-05	5.21064e-05	3.43268e-05	6.92608e-05	6.63478e-05	4.85859e-05	7.92563e-05	4.54096e-05	4.31102e-05	8.00254e-05	6.60025e-05	4.46263e-05	9.04135e-05	8.27447e-05	6.45116e-05	4.23137e-05	4.81363e-05	5.67963e-05	4.76953e-05	6.21655e-05	6.6135e-05
423	SQDG(18:0/16:2)	0.882347	817.501	245.645	1.67037e-05	2.05985e-05	3.10507e-05	1.9324e-05	1.73432e-05	2.11766e-05	1.82321e-05	2.43289e-05	3.39319e-05	2.23449e-05	2.82338e-05	1.45467e-05	8.63993e-06	2.04353e-05	2.2005e-05	2.59285e-05	1.59487e-05	1.59321e-05	1.85398e-05	1.17511e-09	1.97623e-05	2.12644e-05	2.02981e-05	1.22256e-09	1.19855e-05	2.02979e-05	1.9807e-05	1.8739e-05	2.52378e-05	1.64646e-05	1.94449e-05	2.49862e-05	2.34838e-05	2.16141e-05	1.87617e-05	1.53927e-05	1.18155e-09	3.06873e-05	2.48509e-05	1.21397e-05	1.7641e-05	1.8155e-05	2.39218e-05	2.32518e-05	2.76883e-05
417	SQDG(18:0/18:3)	0.885009	843.519	236.292	8.16034e-07	6.83967e-07	2.89676e-06	2.37391e-06	1.48982e-06	9.83153e-07	1.57248e-06	1.32468e-06	1.18992e-09	1.06223e-07	2.45639e-06	1.79119e-06	5.16115e-07	1.45896e-06	1.25468e-06	1.25393e-06	1.39407e-06	1.23148e-06	2.93115e-07	1.17511e-09	1.19497e-06	2.41811e-06	1.1237e-06	1.22256e-09	8.40435e-07	1.51529e-06	1.8134e-06	1.59957e-06	1.53175e-06	1.22933e-06	1.69396e-06	1.89563e-06	2.80249e-06	2.07727e-06	1.16315e-06	7.71816e-07	9.20371e-07	3.6165e-07	9.78357e-07	8.82745e-07	1.08767e-06	1.3354e-06	9.04616e-07	1.05347e-06	1.68616e-06
418	SQDG(18:0/18:4)	0.88495	841.503	239.542	9.93967e-06	8.445e-06	1.75026e-05	5.18299e-06	8.81718e-06	7.91075e-06	1.01983e-05	1.64333e-05	1.18992e-09	1.08737e-05	1.57526e-05	1.12101e-05	5.27544e-06	1.03368e-05	8.88392e-06	1.07771e-05	8.70454e-06	8.55632e-06	8.49848e-06	1.17511e-09	9.16506e-06	5.81685e-06	9.40281e-06	1.22256e-09	5.994e-06	1.08735e-05	7.8656e-06	1.05086e-05	1.13683e-05	8.69736e-06	1.0802e-05	1.27939e-05	1.80452e-05	1.26695e-05	1.10865e-05	6.28165e-06	1.57803e-05	9.52503e-06	9.52902e-06	6.34274e-06	6.89105e-06	9.51376e-06	1.09569e-05	1.17609e-05	1.17472e-05
380	SQDG(18:0/20:4)	0.899223	869.554	332.476	7.48086e-06	1.22357e-05	1.44693e-05	8.20192e-06	1.2027e-05	1.67673e-05	2.61444e-05	1.3715e-05	1.376e-05	1.78048e-05	1.59776e-05	6.064e-06	8.06392e-06	1.25552e-05	1.70641e-05	1.15449e-05	8.38336e-06	1.11612e-05	1.28609e-05	2.06952e-05	1.33488e-05	1.51513e-05	1.44143e-05	1.92344e-05	8.33244e-06	1.23309e-05	1.14062e-05	2.30701e-05	1.18717e-05	1.97919e-05	1.75696e-05	1.60523e-05	1.92055e-05	2.36965e-05	2.41219e-05	9.49149e-06	1.18155e-09	2.06472e-05	1.3621e-05	4.06959e-06	1.12875e-05	1.47683e-05	1.34044e-05	1.57825e-05	1.48625e-05
574	SQDG(18:0/20:5)	0.861841	867.558	285.601	4.34667e-06	1.33755e-09	6.98108e-07	5.10798e-06	4.13067e-06	4.31241e-06	1.51967e-06	3.3421e-06	1.29075e-06	1.51361e-07	2.82653e-06	1.30381e-06	4.29357e-06	1.32159e-06	4.34255e-06	4.64446e-06	1.53165e-06	1.51708e-06	4.73699e-07	1.97662e-06	2.45663e-06	2.15778e-06	3.01586e-06	1.68931e-06	4.51655e-07	2.37303e-06	2.26525e-06	3.34333e-07	2.72586e-06	8.51305e-07	1.58624e-06	9.45895e-07	4.32861e-06	8.36787e-07	2.8777e-06	1.84583e-06	1.27309e-06	3.36049e-07	1.8957e-06	2.06751e-06	1.69926e-06	1.77785e-06	2.4016e-06	1.79831e-06	1.60385e-06
401	SQDG(19:2/19:2)	0.890012	869.534	374.698	3.34181e-06	1.33755e-09	1.33179e-06	1.67626e-06	1.4672e-06	1.67918e-06	1.22206e-06	1.59352e-06	1.16406e-06	7.16454e-07	1.228e-09	1.42614e-06	1.42029e-09	1.29498e-06	9.05353e-07	1.27075e-09	1.7054e-06	1.17277e-06	2.02295e-06	1.25604e-06	1.19906e-06	1.30829e-09	1.33206e-06	1.26331e-06	1.43359e-09	1.78105e-06	1.12608e-06	1.0529e-06	1.14652e-06	9.27373e-07	1.23474e-06	1.68158e-06	1.52768e-06	1.55152e-06	1.74039e-06	1.72322e-06	1.74002e-06	1.52721e-06	1.55584e-06	2.11071e-06	1.706e-06	1.33655e-06	1.07256e-06	1.28643e-06	1.53241e-06
615	SQDG(20:0/26:4)	0.826261	981.65	581.578	4.57478e-09	7.64045e-05	5.86879e-05	6.89555e-05	8.17147e-05	6.54844e-05	7.22195e-05	8.16943e-05	7.61353e-05	7.39153e-05	9.79127e-05	6.6623e-05	7.74654e-05	7.39433e-05	6.62629e-05	7.88032e-05	6.12826e-05	5.33672e-05	7.16743e-05	8.12986e-05	6.91925e-05	8.5391e-05	7.8801e-05	8.7382e-05	6.93672e-05	6.1164e-05	6.66101e-05	7.0567e-05	8.27299e-05	5.78597e-05	8.06843e-05	6.19784e-05	7.27658e-05	6.60733e-05	7.73826e-05	6.25791e-05	7.94158e-05	7.76755e-05	8.89117e-05	6.14619e-05	4.95345e-05	7.19167e-05	6.58319e-05	7.18031e-05	7.17484e-05
614	SQDG(21:0/26:4)	0.826261	995.667	599.899	4.57478e-09	0.000345644	0.00030534	0.000302489	0.000321295	0.000325986	0.000326413	0.000358597	0.000297519	0.00037627	0.0003393	0.000295362	0.000373597	0.000356743	0.000323669	0.000315825	0.000311318	0.000312672	0.0003308	0.000386986	0.000315292	0.000355203	0.000403075	0.000354406	0.0003752	0.000311795	0.000334391	0.000363142	0.000361774	0.000305857	0.000359568	0.000318025	0.000394757	0.000345936	0.000407506	0.000346799	0.000341152	0.000395976	0.00034706	0.000291473	0.000290523	0.000350181	0.000312559	0.000323875	0.000312689
616	SQDG(21:1/26:4)	0.826261	993.651	564.165	0.000251822	0.000168354	0.000114068	0.000124548	0.00013473	0.000127746	0.00011516	0.000131816	0.000147584	0.000112544	0.000134769	0.000133645	0.000144184	0.000120929	1.32527e-09	0.000131141	0.000132683	0.00011146	0.000116119	0.000139125	0.000129621	0.000151034	0.000120804	0.000142789	0.000131809	0.000118367	0.00011587	0.000127249	1.19335e-09	0.000117826	0.000135824	0.000115507	1.47183e-09	0.000163847	0.000142944	0.000105672	0.000147658	0.000141708	0.000125763	0.000101902	0.000117234	0.000116191	0.000124854	0.00011104	0.000130912
539	TAG(12:0/12:0/16:3)	0.875997	711.541	371.341	4.60002e-05	4.84058e-05	7.83755e-05	0.000115481	7.33033e-05	0.000102882	9.53683e-05	8.65109e-05	8.30627e-05	7.84009e-05	9.12794e-05	4.28639e-05	8.3533e-05	9.46029e-05	7.12969e-05	0.00010079	6.43204e-05	4.1128e-05	6.54546e-05	6.92689e-05	7.66164e-05	1.30829e-09	7.87498e-05	0.000135246	7.12529e-05	0.000112917	7.88189e-05	0.000103277	0.000102584	0.000100488	0.000113729	9.24709e-05	9.40889e-05	0.000109126	0.00010181	4.24568e-05	1.18155e-09	0.000134185	7.93382e-05	4.68233e-05	5.98972e-05	8.28631e-05	9.8044e-05	9.81e-05	9.68927e-05
530	TAG(12:0/12:0/16:5)	0.875997	707.54	408.004	4.57478e-09	0.000773011	0.000363246	0.000678501	0.000414992	0.000510245	0.000552659	0.000749011	0.000452575	0.000314929	0.000571666	0.000675694	0.000918267	0.000675547	0.000787148	1.27075e-09	0.000629968	0.000623847	0.000580024	0.000653103	0.000546222	1.30829e-09	0.000551821	0.000541912	0.000789217	0.000905938	0.000737491	0.000518169	0.000616611	0.000606082	0.00058625	0.000669459	0.000693123	0.000610099	0.000571718	0.000663969	1.18155e-09	0.000680919	0.000661836	0.000835072	0.000573701	0.000590669	0.000644441	0.000599262	0.00065789
508	TAG(12:0/12:0/17:0)	0.875997	731.577	521.151	0.000257088	0.000124808	0.000119636	0.000150514	0.000128542	0.000151994	0.000114676	0.000120767	0.00016123	0.000118301	0.000133919	0.000171782	0.000111257	0.00013722	0.000113913	0.000171612	0.000121533	0.000126062	0.000137211	0.000161124	0.000141659	1.30829e-09	0.000121395	0.000145152	0.000127425	0.000148198	0.000140055	0.000127937	0.000129218	0.000146993	0.000122375	0.000122611	0.000113013	0.000169321	9.5519e-05	0.000137299	0.000160545	0.000169835	0.000122744	0.000145224	0.000116729	0.000128079	0.000132523	0.000132609	0.000134908
534	TAG(12:0/12:0/17:3)	0.875997	725.556	396.333	0.00497286	0.00167461	0.00152776	0.00191019	0.00177101	0.00187555	0.0016316	0.00166807	0.0012035	0.00139305	0.00171196	0.00171494	0.00158701	0.00106551	0.00171759	0.00151687	0.00178233	0.00192287	0.00180612	0.00147616	0.00179648	0.00141292	0.00162133	0.00125224	0.00165258	0.0016047	0.00184241	0.00142615	0.00178974	0.00168731	0.00115828	0.00146515	0.00155693	0.00120557	0.00127993	0.00130462	0.00125969	0.00149833	0.0012039	0.00219786	0.0013736	0.00148966	0.00116223	0.00107281	0.00120875
520	TAG(12:0/12:0/18:4)	0.875997	737.577	458.574	4.57478e-09	0.000546627	0.000550528	0.00052213	0.000476909	0.000458144	0.000503396	0.000557522	0.000399284	0.000408105	0.000484033	0.000564139	0.00058568	0.000512928	0.000555586	0.00050484	0.00053459	0.000501719	0.000518474	0.000490147	0.000483739	0.000554281	0.000517036	0.000565522	0.000539041	0.000462329	0.000484336	0.000512445	1.19335e-09	0.00046385	1.19971e-09	0.000483822	0.000617035	0.00054685	0.000548388	0.000510184	0.000481746	0.000537474	0.000511995	0.00054901	0.000575895	0.000473062	0.00050695	0.00047785	0.00049332
499	TAG(12:0/12:0/19:0)	0.875997	759.608	556.084	4.57478e-09	1.34901e-05	1.71954e-05	2.20211e-05	1.19327e-05	1.97595e-05	1.21467e-05	1.39492e-05	2.05767e-05	1.21243e-05	1.23443e-05	2.03994e-05	1.01742e-05	1.2864e-05	1.33185e-05	2.06134e-05	1.22731e-05	1.86627e-05	1.40868e-05	1.90132e-05	1.48475e-05	2.43276e-05	1.456e-05	1.28645e-05	1.71951e-05	2.16305e-05	1.51405e-05	1.34614e-05	1.54199e-05	1.8472e-05	1.44822e-05	1.48182e-05	1.17919e-05	1.21068e-09	1.14136e-05	1.46675e-05	1.46741e-05	1.89379e-05	1.14621e-05	1.35926e-05	1.64882e-05	1.47701e-05	1.57549e-05	1.5579e-05	1.54523e-05
522	TAG(12:0/12:0/19:3)	0.875997	753.588	453.436	0.000650844	0.000148236	0.000140337	0.000193041	0.000179203	0.000196347	0.000121233	0.000111255	0.000178363	0.000163616	0.000104886	0.000163248	9.83555e-05	0.000127805	0.000101693	9.41509e-05	0.000172471	0.000133641	0.000140208	9.26546e-05	0.000165579	0.00018047	0.000181555	8.65919e-05	0.000194045	0.000138464	0.000214678	0.00011712	0.000123509	0.000162541	7.91976e-05	0.000138567	0.000136809	8.01382e-05	9.48723e-05	0.000180271	0.000150768	0.000139376	0.000134726	0.000305239	0.000119099	0.000147902	0.000130666	0.000121412	0.000122975
510	TAG(12:0/12:0/19:5)	0.875997	749.615	505.575	2.76635e-05	4.05839e-05	3.32218e-05	2.8781e-05	3.33257e-05	3.26124e-05	4.32022e-05	3.39225e-05	4.04979e-05	3.87747e-05	4.80134e-05	2.41195e-05	2.93685e-05	3.69899e-05	4.91633e-05	3.61864e-05	3.16473e-05	3.92197e-05	3.51538e-05	4.78875e-05	3.65167e-05	5.27427e-05	4.08719e-05	4.37167e-05	2.83149e-05	3.05838e-05	2.70516e-05	3.81503e-05	4.03878e-05	2.803e-05	4.42816e-05	2.84724e-05	3.0036e-05	4.68596e-05	3.61447e-05	2.87071e-05	5.17453e-05	4.76339e-05	5.50728e-05	2.23593e-05	4.301e-05	3.82086e-05	3.74668e-05	3.9077e-05	3.95086e-05
494	TAG(12:0/12:0/20:0)	0.875997	773.651	568.262	1.63988e-05	2.28408e-05	9.84807e-06	1.09424e-05	2.12582e-05	1.43692e-05	1.52477e-05	1.81961e-05	1.90157e-05	2.25357e-05	3.13827e-05	9.74253e-06	1.46327e-05	1.62181e-05	2.39212e-05	2.12442e-05	1.05485e-05	2.25197e-05	1.4999e-05	3.12312e-05	1.83546e-05	2.04136e-05	1.86595e-05	2.31505e-05	1.93894e-05	1.4423e-05	1.46807e-05	1.59516e-05	1.74499e-05	1.2277e-05	1.35094e-05	1.85672e-05	1.50339e-05	2.69223e-05	2.28687e-05	1.25338e-05	1.91632e-05	2.78333e-05	3.07952e-05	8.55053e-06	1.04628e-05	1.81318e-05	1.77703e-05	1.717e-05	1.72332e-05
497	TAG(12:0/12:0/21:1)	0.875997	785.624	560.275	4.57478e-09	5.87067e-06	5.94955e-06	9.41227e-06	1.47131e-09	8.94358e-06	2.93986e-06	4.55868e-06	4.00472e-06	5.61546e-06	6.00476e-06	2.60448e-06	1.42029e-09	5.07657e-06	4.06588e-06	6.04304e-06	3.68987e-06	4.25589e-06	4.73661e-06	6.04692e-06	4.49131e-06	5.62097e-06	2.75247e-06	1.88307e-06	4.16863e-06	5.07405e-06	5.11835e-06	4.21363e-06	4.65226e-06	3.93793e-06	5.94417e-06	4.79736e-06	4.69653e-06	4.21436e-06	4.08646e-06	2.32865e-06	6.73446e-06	9.615e-06	2.49399e-06	3.18978e-06	4.75348e-06	4.51378e-06	5.68369e-06	6.09765e-06	5.74483e-06
461	TAG(12:0/12:0/22:0)	0.875997	801.693	707.757	4.0129e-05	1.07508e-05	9.05231e-06	1.19478e-05	8.06769e-06	1.00348e-05	1.16309e-05	2.0336e-05	1.1738e-05	1.08051e-05	7.51866e-06	2.64375e-05	1.42029e-09	1.72748e-05	1.8158e-05	2.22309e-05	9.1608e-06	3.03178e-05	1.01244e-05	1.27057e-05	1.49211e-05	1.23593e-05	2.69917e-05	7.30563e-06	1.65028e-05	1.16348e-05	8.79752e-06	9.93345e-06	1.19657e-05	1.24453e-05	7.92019e-06	1.5989e-05	1.09192e-05	9.04575e-06	7.04891e-06	1.30794e-05	1.09328e-05	1.0211e-05	2.11998e-05	1.81728e-09	1.02062e-05	1.17245e-05	1.95669e-05	2.06573e-05	1.93699e-05
472	TAG(12:0/12:0/22:1)	0.875997	799.678	689.537	3.07028e-05	6.76828e-06	6.69419e-06	7.60193e-06	2.97746e-06	6.8284e-06	7.04076e-06	1.95211e-05	8.10914e-06	1.05965e-05	2.67602e-06	1.49885e-09	1.42029e-09	1.35737e-05	1.23469e-05	1.52471e-05	6.55816e-06	1.50377e-09	5.91179e-06	9.39807e-06	8.62784e-06	6.96962e-06	1.40393e-09	3.99803e-06	1.21676e-05	9.49687e-06	4.97825e-06	8.32593e-06	6.92433e-06	6.45808e-06	5.21473e-06	6.64064e-06	6.48196e-06	5.55471e-06	3.72571e-06	7.35652e-06	6.05534e-06	5.78069e-06	1.27449e-09	1.81728e-09	8.32368e-06	5.72286e-06	1.80107e-05	1.75151e-05	1.80219e-05
478	TAG(12:0/12:0/22:2)	0.875997	797.661	671.303	1.51941e-05	3.16708e-06	3.73719e-06	4.78449e-06	1.27104e-06	3.95194e-06	4.34609e-06	1.02298e-05	4.55954e-06	7.76351e-06	1.67255e-06	1.49885e-09	1.42029e-09	7.61017e-06	5.2117e-06	8.6132e-06	3.76638e-06	1.50377e-09	2.98768e-06	4.97105e-06	4.6921e-06	4.17593e-06	1.40393e-09	1.59255e-06	5.95267e-06	5.47988e-06	2.76523e-06	4.52076e-06	4.13578e-06	5.04262e-06	2.23145e-06	4.38338e-06	3.71683e-06	3.2557e-06	1.74052e-06	4.36208e-06	3.76561e-06	3.82515e-06	1.27449e-09	1.81728e-09	4.28518e-06	3.26179e-06	9.55012e-06	9.15958e-06	9.17619e-06
500	TAG(12:0/12:0/22:5)	0.875997	791.636	553.21	4.57478e-09	1.42877e-05	7.0255e-06	1.14414e-05	1.61429e-05	1.2829e-05	1.0695e-05	1.47564e-05	1.79507e-05	1.92249e-05	1.6054e-05	9.5672e-06	1.24394e-05	2.0794e-05	1.17331e-05	1.19058e-05	1.38053e-05	1.0064e-05	1.30714e-05	1.77296e-05	1.30761e-05	1.98592e-05	1.71732e-05	1.61696e-05	1.4754e-05	1.76611e-05	1.33822e-05	1.64409e-05	1.44858e-05	1.39339e-05	1.44316e-05	1.58309e-05	1.1765e-05	1.43689e-05	9.805e-06	1.28074e-05	1.66098e-05	1.70196e-05	1.67789e-05	1.11034e-05	1.0484e-05	1.47432e-05	1.607e-05	6.98228e-06	1.48355e-05
526	TAG(12:0/12:0/22:7)	0.875997	787.592	437.774	0.000254519	0.000324793	0.000200816	0.000278179	0.000334168	0.000202405	0.0004116	0.000369384	0.000260396	0.000279465	0.000393933	0.000243375	0.000401951	0.000395032	0.000414576	0.000281984	0.000429979	0.000413848	0.000258217	0.000295778	0.00032222	0.000579513	0.000295086	0.000241237	0.000529848	0.000310369	0.00029598	0.000535777	0.000500336	0.000429456	0.000230323	0.000461118	0.00035036	0.000427807	0.000454858	0.000495412	0.00034421	0.000378375	0.000492934	0.000440338	0.000341613	0.000406747	0.000440141	0.000299112	0.000297459
115	TAG(12:0/16:0/18:2)	0.982198	792.705	671.316	1.39157e-05	3.95729e-06	3.61068e-06	4.16785e-06	1.09744e-06	3.27877e-06	3.72295e-06	9.20135e-06	5.09691e-06	1.24641e-09	2.18215e-06	1.49885e-09	1.42029e-09	7.39414e-06	4.24962e-06	7.75541e-06	2.77805e-06	1.50377e-09	2.71603e-06	4.26326e-06	3.96966e-06	4.01757e-06	1.40393e-09	1.69409e-06	5.74738e-06	4.77079e-06	2.13122e-06	4.91594e-06	3.42074e-06	4.9737e-06	2.25976e-06	4.08751e-06	3.25349e-06	3.85062e-06	1.727e-06	3.82529e-06	4.0669e-06	4.06355e-06	9.78668e-06	1.81728e-09	3.93949e-06	3.62675e-06	9.34098e-06	9.01336e-06	9.50313e-06
513	TAG(12:0/16:4/16:4)	0.875997	757.553	486.291	5.24577e-05	3.28308e-05	3.67164e-05	3.18369e-05	4.35507e-05	2.02838e-05	1.30837e-09	1.33023e-09	2.19894e-05	1.99598e-05	2.24169e-05	3.39648e-05	4.02098e-05	2.1813e-05	3.10746e-05	3.37586e-05	3.36364e-05	3.38775e-05	3.21115e-05	1.49267e-05	2.78709e-05	1.97769e-05	4.18849e-05	2.76364e-05	3.97691e-05	2.45631e-05	3.03509e-05	2.83706e-05	2.75387e-05	2.6477e-05	2.92894e-05	3.64391e-05	3.74187e-05	2.65383e-05	2.81312e-05	2.67869e-05	1.94252e-05	2.13151e-05	2.87879e-05	3.50531e-05	3.19471e-05	2.9375e-05	2.25142e-05	2.22632e-05	2.47487e-05
470	TAG(12:0/18:1/18:1)	0.875997	825.691	692.119	0.000114147	1.94331e-05	1.93467e-05	3.46415e-05	1.50247e-05	1.90141e-05	2.17428e-05	3.86129e-05	3.33441e-05	2.78001e-05	1.65905e-05	1.49885e-09	6.09381e-05	2.37541e-05	4.01978e-05	5.47884e-05	3.13086e-05	1.50377e-09	2.14309e-05	2.24778e-05	3.07298e-05	2.36051e-05	3.7661e-05	9.91666e-06	3.27655e-05	3.03642e-05	1.50384e-05	1.87013e-05	2.38249e-05	3.01723e-05	1.37791e-05	2.53941e-05	1.97113e-05	1.72971e-05	1.24057e-05	2.9158e-05	2.20064e-05	2.00784e-05	5.52294e-05	1.81728e-09	2.56741e-05	2.31392e-05	3.79713e-05	3.82509e-05	3.98738e-05
505	TAG(12:0/18:2/18:2)	0.875997	821.649	544.157	4.57478e-09	4.89947e-05	4.11467e-05	4.26905e-05	5.67935e-05	4.09242e-05	5.01867e-05	8.46891e-05	4.36422e-05	3.78658e-05	4.87343e-05	6.73216e-05	5.29514e-05	4.895e-05	6.08866e-05	8.55569e-05	4.2706e-05	3.56133e-05	6.89642e-05	6.27808e-05	5.10701e-05	6.40874e-05	4.12335e-05	5.89482e-05	3.83169e-05	4.27707e-05	3.68051e-05	6.96163e-05	6.14748e-05	4.3231e-05	5.34563e-05	4.30423e-05	8.70729e-05	5.32849e-05	5.16014e-05	4.10173e-05	1.18155e-09	5.64797e-05	5.18914e-05	6.57004e-05	3.55356e-05	4.97784e-05	4.61871e-05	4.73845e-05	4.69455e-05
517	TAG(12:0/18:4/18:4)	0.875997	813.607	465.293	0.000579547	0.000281808	0.00033754	0.000322652	0.000331669	0.000452186	0.000357615	0.000283952	0.000402913	0.000344726	0.000398808	0.000362448	0.000267576	0.000319567	0.00026945	0.000260242	0.000421584	0.000438429	0.000300071	0.000271687	0.000350224	0.000490982	0.000298501	0.000389251	0.000276277	0.000342018	0.000346872	0.00038268	0.00036377	0.000383506	0.000311854	0.000338377	0.000481426	0.000316835	0.000297304	0.00038981	0.000425924	0.000492153	0.000304352	0.0004557	0.000283802	0.00036857	0.000320153	0.000300605	0.000364571
514	TAG(12:0/18:5/18:5)	0.875997	809.587	476.241	4.57478e-09	0.000267715	0.00032726	0.00033066	0.000331324	0.0003417	0.000158403	0.000241801	0.000221216	0.000316225	0.000292755	0.000325084	1.42029e-09	0.000244408	0.000269104	0.00030783	0.000295671	0.000326357	0.000294528	0.000141309	0.000251668	0.000312648	0.000280312	0.000148263	0.000295521	0.000405084	0.000369282	0.000202181	0.000292809	0.000306221	0.000206308	0.000116655	0.000311804	0.000198104	0.000218696	0.00032464	0.000151712	0.000253553	0.000275894	0.000504367	0.00036207	0.000276806	0.000254504	0.000243769	0.000167252
467	TAG(12:0/19:1/19:1)	0.875997	853.715	694.276	5.76548e-05	8.65818e-06	1.04801e-05	1.97787e-05	7.64298e-06	7.1778e-06	8.38593e-06	1.19354e-05	1.60378e-05	1.75081e-05	1.08517e-05	1.49885e-09	1.42029e-09	1.7979e-05	1.53414e-05	2.39086e-05	1.75005e-05	1.91254e-05	1.21139e-05	9.84227e-06	1.45963e-05	1.00298e-05	9.04351e-06	3.67615e-06	1.28664e-05	1.28735e-05	6.31644e-06	8.0767e-06	1.06064e-05	1.40314e-05	6.39055e-06	1.02175e-05	7.575e-06	8.71183e-06	6.10806e-06	1.29873e-05	7.92681e-06	8.74811e-06	2.1157e-05	1.81728e-09	1.40231e-05	9.56838e-06	1.41804e-05	1.40206e-05	1.46777e-05
476	TAG(12:0/19:2/19:2)	0.875997	849.693	677.231	8.46254e-05	1.37742e-05	1.59284e-05	2.85488e-05	9.61395e-06	1.04632e-05	1.09194e-05	1.39317e-05	2.26334e-05	3.14201e-05	1.51262e-05	1.49885e-09	1.42029e-09	2.26784e-05	1.97922e-05	3.35065e-05	2.28468e-05	1.50377e-09	1.77237e-05	1.30007e-05	1.93269e-05	1.34387e-05	9.02991e-06	4.35453e-06	1.52659e-05	1.50351e-05	7.92124e-06	8.65538e-06	1.69837e-05	1.94651e-05	7.25851e-06	1.18079e-05	8.60671e-06	1.28853e-05	6.6879e-06	1.89175e-05	1.06538e-05	1.37177e-05	2.52968e-05	1.81728e-09	1.80548e-05	1.22019e-05	2.19889e-05	2.03616e-05	2.03462e-05
433	TAG(12:0/20:0/20:0)	0.875997	885.783	789.329	1.25132e-06	6.07035e-07	8.72483e-08	8.78191e-07	1.7389e-06	6.02944e-07	2.53635e-07	8.51315e-07	4.12104e-08	1.46292e-07	5.27661e-08	4.21401e-08	1.22355e-07	2.69648e-08	1.72138e-06	6.18172e-07	4.33746e-07	1.29385e-06	9.37089e-07	7.89583e-07	6.24806e-07	5.98114e-07	3.42437e-07	1.22256e-09	2.02842e-08	1.66255e-07	8.21007e-08	5.10432e-07	8.67858e-07	5.2281e-08	5.11444e-08	6.79059e-07	1.09112e-07	6.28271e-08	2.22929e-07	1.33743e-09	1.04071e-06	4.91145e-07	4.89387e-08	4.94524e-07	2.28796e-08	2.93279e-07	4.76703e-07	4.93054e-07	5.92231e-07
460	TAG(12:0/20:2/20:2)	0.875997	877.727	708.518	0.000146652	7.25806e-05	0.000115427	0.000127793	6.75002e-05	6.81338e-05	9.98111e-05	5.75214e-05	8.05829e-05	9.82969e-05	6.64434e-05	0.000164263	1.42029e-09	4.98721e-05	4.94427e-05	1.27075e-09	9.50415e-05	1.50377e-09	5.70759e-05	4.48993e-05	7.3067e-05	6.13412e-05	6.7457e-05	6.99301e-05	0.000110733	6.0562e-05	5.40895e-05	8.58862e-05	0.000101484	0.0001596	6.49478e-05	0.000118347	6.56013e-05	8.44796e-05	4.4669e-05	0.000104552	7.17876e-05	9.09574e-05	9.74602e-05	1.81728e-09	5.97185e-05	7.86803e-05	7.90219e-05	8.48859e-05	7.97623e-05
439	TAG(12:0/22:1/22:1)	0.875997	937.816	761.993	4.89892e-05	9.65688e-06	1.41744e-05	1.46538e-05	7.20829e-06	7.13895e-06	5.30024e-06	7.82791e-06	7.18432e-06	1.5799e-05	7.86894e-06	1.95855e-05	1.20848e-05	8.77446e-06	4.98224e-06	1.07224e-05	7.88663e-06	1.11778e-05	5.58886e-06	5.37492e-06	1.1599e-05	1.39729e-05	1.02505e-05	5.91315e-06	9.51243e-06	1.02999e-05	7.89803e-06	1.2886e-05	7.97774e-06	1.7032e-05	4.21184e-06	1.00657e-05	6.21966e-06	1.5601e-05	6.16213e-06	9.18879e-06	6.57173e-06	8.94863e-06	7.4244e-06	1.81728e-09	7.42132e-06	8.87798e-06	7.96375e-06	8.73707e-06	1.12112e-05
448	TAG(12:0/22:2/22:2)	0.875997	933.785	737.165	0.0002342	7.00415e-05	1.46536e-09	8.65972e-05	4.64112e-05	8.76614e-05	7.60989e-05	6.96558e-05	4.85738e-05	9.03029e-05	1.228e-09	1.49885e-09	0.000102028	4.78719e-05	3.10693e-05	3.90106e-05	3.59461e-05	5.8402e-05	4.12161e-05	6.80748e-05	6.16583e-05	0.000110638	4.05276e-05	5.77351e-05	9.18224e-05	4.44513e-05	5.96785e-05	7.62483e-05	5.47878e-05	1.34107e-09	6.45066e-05	5.3882e-05	4.11947e-05	0.000127936	4.72954e-05	8.42301e-05	4.5081e-05	6.17914e-05	4.13368e-05	0.000142299	5.32204e-05	6.49332e-05	5.55577e-05	0.000125762	5.71648e-05
533	TAG(12:1/12:1/17:2)	0.875997	723.513	397.38	6.16662e-06	2.65488e-06	5.59458e-06	5.44888e-06	4.33436e-06	4.66782e-06	2.70326e-06	3.54781e-06	3.08127e-06	1.32912e-06	1.04706e-05	1.49885e-09	3.57091e-06	1.13128e-09	1.98452e-06	2.29947e-06	6.73178e-06	1.50377e-09	1.30715e-05	4.12189e-06	4.08917e-06	4.20115e-06	1.90844e-06	3.25127e-06	1.0363e-05	1.28533e-09	1.46205e-09	2.11708e-06	4.23525e-06	3.36929e-06	1.9776e-06	3.45962e-06	1.47183e-09	1.93165e-06	4.06404e-06	2.8806e-06	3.05981e-06	3.85077e-06	1.27449e-09	6.02013e-06	2.66989e-06	2.96825e-06	3.00953e-06	2.58903e-06	1.78873e-05
516	TAG(12:1/12:1/19:4)	0.875997	747.563	466.303	7.58372e-05	4.73882e-05	4.01182e-05	4.63573e-05	4.65504e-05	5.04201e-05	4.53542e-05	4.20296e-05	3.39895e-05	4.7586e-05	4.22555e-05	3.44439e-05	4.61895e-05	4.75667e-05	4.67325e-05	4.82478e-05	4.28313e-05	2.70595e-05	4.52946e-05	4.91451e-05	4.52699e-05	5.91118e-05	4.24794e-05	4.25177e-05	4.12678e-05	3.14866e-05	1.46205e-09	4.18484e-05	4.92803e-05	4.22946e-05	3.76543e-05	5.05664e-05	4.20725e-05	4.24207e-05	3.75097e-05	4.70037e-05	5.42841e-05	6.04296e-05	4.65009e-05	4.01678e-05	4.98299e-05	4.29364e-05	3.86178e-05	4.09046e-05	3.81995e-05
515	TAG(12:1/12:1/19:5)	0.875997	745.555	466.366	4.57478e-09	0.000927536	0.000840641	0.000958386	0.000961766	0.000998393	0.00100235	0.000780032	0.000702655	0.00106555	0.000866833	0.000662052	0.000756485	0.00100338	0.000908003	0.000997676	0.000875694	0.000642618	0.000976404	0.00101656	0.000847151	0.00110213	0.000898072	0.000861063	0.00090086	0.000749524	0.00104382	0.000808104	0.00111841	0.0008449	0.000867242	0.000997224	0.000836117	0.000837239	0.000789542	0.00087814	0.00108629	1.27249e-09	0.00093575	0.000765665	0.00112893	0.000872451	0.000850555	0.000785538	0.000838648
509	TAG(12:1/12:1/21:5)	0.875997	773.624	511.295	8.19108e-05	5.52601e-05	3.31904e-05	5.7679e-05	5.4359e-05	6.24576e-05	5.64896e-05	5.53554e-05	5.66915e-05	6.74193e-05	4.12142e-05	4.52127e-05	4.36676e-05	6.2764e-05	7.11278e-05	7.01243e-05	5.52654e-05	5.97894e-05	5.72906e-05	5.80735e-05	5.72671e-05	8.82368e-05	5.87818e-05	7.6643e-05	3.73084e-05	4.76093e-05	4.73798e-05	3.21523e-05	2.66263e-05	5.32069e-05	6.35977e-05	3.10113e-05	2.26871e-05	5.66062e-05	4.63532e-05	4.67804e-05	2.02063e-05	8.0386e-05	4.15159e-05	5.13387e-05	5.62989e-05	4.92363e-05	5.95705e-05	3.77166e-05	6.16847e-05
527	TAG(12:1/12:1/22:6)	0.875997	785.588	437.716	4.57478e-09	0.00652273	0.00718798	0.00562105	0.00928536	0.0069838	0.00852806	0.00716645	0.00521488	0.00855705	0.00479153	0.00501194	0.00800095	0.00803601	0.00868258	0.00558087	0.00870352	0.0080805	0.00860059	0.00907207	0.0069814	0.0116441	0.00880434	0.00507969	0.0103677	0.00922105	0.0092495	0.0106033	0.00728468	0.00847347	0.00780668	0.00639098	0.00682662	0.00852591	0.00933244	0.0102938	0.00624637	0.00799317	0.00977957	0.00867899	0.0108043	0.00867033	0.00611489	0.00880918	0.00871999
518	TAG(12:1/12:1/22:7)	0.875997	783.572	464.809	4.57478e-09	0.000347249	0.000408148	0.000175945	0.00035855	0.000261872	0.000285836	0.000229487	0.000165188	0.00018272	0.00022126	0.000305075	0.00040805	0.000217327	0.00026669	0.000348426	0.000225904	0.000262828	0.000230904	0.000165122	0.000253329	0.000266406	0.000196672	0.00019663	0.000246652	0.000232785	0.000239731	0.000154445	1.19335e-09	0.000204662	0.000195944	0.000266296	0.000197472	0.000207386	0.000190575	0.000232665	0.000131608	8.95699e-05	0.000178397	0.00047772	0.000362677	0.000213415	0.000177594	0.000175079	0.0001875
493	TAG(12:1/18:0/18:0)	0.875997	827.698	578.926	6.73611e-05	9.85239e-05	4.49041e-05	8.76689e-05	4.49563e-05	7.85941e-05	4.41278e-05	8.33434e-05	9.69934e-05	4.39755e-05	5.23508e-05	6.72853e-05	4.00467e-05	9.17821e-05	5.70459e-05	0.000124951	4.18475e-05	6.14302e-05	7.51822e-05	0.000102556	7.02463e-05	0.000130634	8.57058e-05	4.5019e-05	8.04108e-05	8.24959e-05	9.20975e-05	3.61627e-05	9.46239e-05	6.85133e-05	8.74514e-05	7.12741e-05	7.25658e-05	6.55706e-05	8.54212e-05	6.03073e-05	0.00013774	0.000104748	8.52997e-05	2.54697e-05	3.36382e-05	7.72574e-05	8.49472e-05	5.23623e-05	8.49892e-05
507	TAG(12:1/18:3/18:3)	0.875997	815.635	524.819	0.000130066	8.15033e-05	4.97622e-05	0.000105728	8.66367e-05	8.80451e-05	6.9851e-05	7.03047e-05	7.75314e-05	9.56196e-05	0.00010195	7.27888e-05	6.13246e-05	0.000103654	8.15104e-05	0.00010346	9.36589e-05	6.58936e-05	7.81464e-05	9.15056e-05	8.5447e-05	1.30829e-09	5.61604e-05	6.57068e-05	7.54046e-05	0.00010541	9.9655e-05	9.1859e-05	9.1047e-05	9.8751e-05	6.2368e-05	7.0211e-05	7.12204e-05	0.000110169	7.47797e-05	8.61265e-05	0.000122896	0.000116962	8.87187e-05	8.97937e-05	6.11159e-05	8.19178e-05	6.69882e-05	7.24925e-05	9.51092e-05
525	TAG(12:1/18:5/18:5)	0.875997	807.571	439.974	0.00153117	0.000582152	0.00054279	0.000540501	1.47131e-09	0.000500221	0.000482005	0.000490459	0.000431121	1.24641e-09	0.000491917	0.000554589	0.000662944	0.00049518	0.000539569	1.27075e-09	0.00060976	0.000587445	0.000521899	0.000442786	0.000500325	1.30829e-09	0.000588818	0.000448733	0.000671936	0.00054813	0.000632419	0.00049595	1.19335e-09	0.00051927	1.19971e-09	0.000543001	0.000579546	0.000452533	0.000541149	0.00061161	1.18155e-09	0.000527307	0.000546677	0.000775861	0.000642845	0.000456289	0.000477989	0.000452278	0.000461929
438	TAG(12:1/19:0/19:0)	0.875997	855.776	763.914	6.13077e-06	4.05604e-06	1.16477e-06	3.32229e-06	4.1719e-06	2.18377e-06	1.25804e-06	3.4709e-06	6.88656e-07	1.49243e-06	7.89361e-07	1.11972e-06	1.2475e-06	6.46234e-07	1.32527e-09	2.51427e-06	1.93133e-06	4.49278e-06	2.58272e-06	2.68999e-06	2.29774e-06	4.68875e-06	1.86985e-06	1.31703e-06	7.24458e-07	1.58331e-06	1.00269e-06	2.51022e-06	5.36154e-07	9.97461e-07	7.55738e-07	3.37921e-06	1.39655e-06	7.71874e-07	1.46011e-06	1.32838e-06	5.75476e-07	1.66953e-06	1.22587e-06	4.61433e-06	1.20551e-06	1.68063e-06	2.22347e-06	2.25776e-06	2.51294e-06
484	TAG(12:1/19:1/19:1)	0.875997	851.696	626.306	4.50032e-05	5.68445e-05	2.57447e-05	4.37505e-05	5.17618e-05	5.05206e-05	4.07905e-05	5.3066e-05	4.05028e-05	4.54923e-05	5.65795e-05	3.92779e-05	6.16221e-05	6.33112e-05	3.78717e-05	7.28694e-05	4.63327e-05	2.86638e-05	4.57365e-05	6.76415e-05	4.86692e-05	8.4957e-05	7.17567e-05	5.95965e-05	5.14843e-05	4.7148e-05	6.52351e-05	5.48338e-05	6.36339e-05	3.40289e-05	4.47006e-05	3.8343e-05	5.29895e-05	3.02253e-05	5.49172e-05	3.36256e-05	7.26808e-05	6.00704e-05	4.66388e-05	2.55451e-05	2.25826e-05	5.07497e-05	3.84992e-05	3.34455e-05	5.30759e-05
529	TAG(12:1/19:5/19:5)	0.875997	835.601	415.999	0.000110014	0.000142094	7.13996e-05	1.03305e-05	7.80618e-05	5.3904e-05	0.000109988	9.47321e-05	3.70562e-05	8.84764e-05	9.83503e-05	6.97869e-05	0.000177611	1.13128e-09	8.70546e-05	6.24962e-05	8.59466e-05	0.00011094	8.23385e-05	8.38216e-05	8.27202e-05	0.000107486	8.13122e-05	6.99426e-05	0.00013594	9.85588e-05	8.52472e-05	0.000157301	9.81886e-05	9.45624e-05	7.38041e-05	9.66991e-05	0.000142233	0.000112795	1.29905e-09	0.000104669	0.000110278	0.000135741	0.000149466	9.06583e-05	0.000111296	0.000102809	9.95948e-05	9.68888e-05	9.95831e-05
435	TAG(12:1/20:0/20:0)	0.875997	883.806	779.656	9.94891e-07	6.41569e-07	9.84471e-08	7.05891e-07	1.10395e-06	1.26801e-07	1.46815e-07	2.3641e-07	2.07279e-08	1.16268e-07	3.76336e-08	9.34602e-08	8.89543e-08	2.80927e-08	1.13564e-06	4.73025e-07	4.22028e-07	1.05032e-06	7.06543e-07	6.51317e-07	4.43939e-07	1.34308e-06	2.37269e-07	1.28284e-07	8.49328e-08	1.28075e-07	1.52172e-08	5.53987e-07	8.83441e-07	1.34107e-09	2.84534e-08	5.4736e-07	1.22734e-07	1.21068e-09	7.55754e-08	1.33743e-09	5.37863e-07	2.61473e-07	4.0275e-08	9.01562e-07	2.47105e-08	2.95909e-07	3.47811e-07	3.8916e-07	2.65252e-07
465	TAG(12:1/20:2/20:2)	0.875997	875.783	695.154	0.000125502	1.61855e-05	3.89243e-05	5.7812e-05	1.63331e-05	1.89822e-05	1.87666e-05	2.35234e-05	4.22353e-05	1.24641e-09	3.78687e-05	1.49885e-09	1.42029e-09	4.33327e-05	3.57375e-05	6.81961e-05	4.14509e-05	1.50377e-09	3.11275e-05	2.32863e-05	3.19635e-05	2.31832e-05	1.76608e-05	7.69287e-06	2.58767e-05	2.86103e-05	1.32273e-05	1.88009e-05	2.76517e-05	3.95939e-05	7.0904e-06	2.41025e-05	1.23148e-05	2.39005e-05	1.3415e-05	3.00663e-05	1.95941e-05	1.10164e-05	4.29866e-05	1.81728e-09	3.68906e-05	2.11838e-05	3.90308e-05	4.21101e-05	3.73712e-05
434	TAG(12:1/21:0/21:0)	0.875997	911.759	785.872	2.77041e-07	4.75045e-07	1.46536e-09	2.13925e-07	4.2659e-07	4.46254e-08	2.47436e-08	3.2816e-07	1.18992e-09	1.65241e-08	1.228e-09	3.60677e-07	1.42029e-09	1.13128e-09	4.95151e-07	1.35024e-07	5.89967e-08	4.50056e-07	1.28743e-07	4.20353e-07	1.93104e-07	2.85629e-07	1.63111e-07	1.22256e-09	1.76969e-08	2.25321e-08	1.46205e-09	1.73446e-07	2.77517e-07	1.6937e-08	1.19971e-09	3.65851e-07	1.47183e-09	1.7632e-08	4.07533e-08	1.33743e-09	2.89137e-07	1.34654e-07	1.27449e-09	5.85936e-07	1.32969e-09	1.20006e-07	3.25752e-08	1.40718e-07	8.74177e-08
436	TAG(12:1/22:0/22:0)	0.875997	939.834	775.456	1.82013e-05	2.8296e-06	5.6085e-06	5.05776e-06	2.77811e-06	2.67976e-06	1.83793e-06	3.53696e-06	2.68949e-06	4.93528e-06	2.53067e-06	1.49885e-09	4.14642e-06	2.88329e-06	1.91264e-06	3.97237e-06	2.76425e-06	4.37344e-06	2.09116e-06	2.05444e-06	3.84424e-06	3.95148e-06	4.19752e-06	2.32089e-06	3.43754e-06	3.17959e-06	2.48897e-06	3.0061e-06	3.45391e-06	6.13662e-06	1.83235e-06	3.09759e-06	2.25464e-06	4.02155e-06	2.16698e-06	3.79627e-06	2.11309e-06	2.65548e-06	2.21767e-06	1.81728e-09	2.19692e-06	2.92635e-06	4.27177e-06	3.75432e-06	4.43522e-06
450	TAG(12:1/22:1/22:1)	0.875997	935.789	735.232	4.69594e-05	1.6422e-05	2.06546e-05	1.70758e-05	9.69685e-06	7.15035e-06	7.41609e-06	5.94182e-06	1.03179e-05	1.24641e-09	1.22276e-05	3.23677e-05	1.43819e-05	1.40701e-05	6.98957e-06	6.88512e-06	7.90949e-06	1.35407e-05	8.53727e-06	5.45864e-06	1.32002e-05	2.72537e-05	7.5601e-06	7.62983e-06	2.25501e-05	9.28259e-06	1.01416e-05	2.12739e-05	1.08286e-05	2.93087e-05	4.88215e-06	1.11268e-05	7.3168e-06	1.13178e-05	8.69512e-06	2.207e-05	8.25252e-06	2.13457e-05	1.18063e-05	2.14507e-05	1.05208e-05	1.42307e-05	1.14285e-05	1.12003e-05	1.35734e-05
479	TAG(12:1/22:4/22:4)	0.875997	923.71	669.92	1.59172e-05	1.02406e-05	8.46231e-06	1.50225e-05	3.62537e-06	2.6468e-06	3.61353e-06	2.13744e-06	1.84809e-05	1.2033e-05	2.41943e-05	2.60751e-05	7.27997e-06	6.46723e-06	2.81222e-06	8.5738e-06	3.86473e-06	1.75017e-05	2.9235e-06	1.73613e-06	9.68041e-06	1.20628e-05	5.82246e-06	7.61641e-06	1.23756e-05	3.83806e-06	4.53273e-06	1.38672e-05	1.07493e-05	1.75305e-05	4.58022e-06	1.70216e-05	3.92971e-06	2.03856e-05	8.19888e-06	1.26835e-05	9.14482e-06	9.53633e-06	1.06228e-05	1.81728e-09	7.89772e-06	9.61989e-06	8.54908e-06	9.68419e-06	9.28104e-06
512	TAG(12:2/12:2/21:4)	0.875997	771.572	491.475	4.57478e-09	5.35386e-05	4.47375e-05	5.52476e-05	5.83917e-05	5.11963e-05	5.72984e-05	5.42105e-05	4.21636e-05	3.86849e-05	4.7344e-05	4.51558e-05	5.07254e-05	5.0848e-05	5.6699e-05	5.18326e-05	4.85181e-05	3.69489e-05	4.98505e-05	5.04248e-05	4.7191e-05	5.87947e-05	4.67455e-05	5.25302e-05	4.61362e-05	5.70454e-05	4.71133e-05	5.46954e-05	5.65386e-05	5.37966e-05	5.43369e-05	4.58211e-05	5.65687e-05	4.78748e-05	5.19007e-05	4.52167e-05	5.70767e-05	5.2252e-05	4.91996e-05	1.81728e-09	5.28139e-05	4.93229e-05	5.42995e-05	5.6846e-05	5.13062e-05
521	TAG(12:2/12:2/22:6)	0.875997	781.593	455.605	1.27031e-05	1.17371e-05	1.04753e-05	6.59082e-06	1.4653e-05	1.03333e-05	1.56512e-05	1.65942e-05	1.87569e-05	1.14875e-05	2.84649e-06	1.49885e-09	1.42029e-09	1.13771e-05	1.59069e-05	1.92857e-05	1.08391e-05	1.01448e-05	1.41298e-05	7.33936e-06	1.10427e-05	1.30829e-09	1.93956e-05	2.48607e-05	8.14377e-06	1.66724e-05	1.33986e-05	1.01617e-05	4.79996e-06	7.6817e-06	1.13437e-05	1.26938e-09	8.15327e-06	1.52337e-05	2.10677e-05	9.10495e-06	2.61222e-05	9.61105e-06	1.27449e-09	1.81728e-09	1.01244e-05	1.0794e-05	9.85852e-06	1.3291e-05	1.24625e-05
537	TAG(12:2/12:2/22:7)	0.875997	779.54	389.949	0.000105203	7.40171e-05	6.4828e-05	6.82882e-05	7.72113e-05	4.58879e-05	5.31096e-05	6.34243e-05	6.31441e-05	5.45821e-05	8.43398e-05	6.78099e-05	5.11184e-05	7.13071e-05	8.41341e-05	5.79506e-05	4.84559e-05	8.17858e-05	4.46256e-05	5.99614e-05	6.60592e-05	6.15318e-05	4.62593e-05	5.98314e-05	4.51962e-05	7.7461e-05	3.752e-05	3.43378e-05	8.36621e-05	4.72647e-05	4.17874e-05	4.79711e-05	4.28318e-05	6.76525e-05	6.06096e-05	4.78639e-05	4.53038e-05	5.01949e-05	6.74816e-05	0.000100557	7.21831e-05	5.68751e-05	4.82023e-05	6.79184e-05	5.7364e-05
535	TAG(12:2/19:5/19:5)	0.875997	833.588	392.034	0.0010237	0.00129711	0.000866845	0.000747747	0.000913054	0.000643145	0.00122222	0.00120771	0.00128221	0.0010129	0.00115207	0.000984509	0.00142255	1.13128e-09	0.000876032	0.000725171	0.000954037	0.00108993	0.000997995	0.00121031	0.000981463	0.000804623	0.00102631	0.00102917	0.00127108	0.00109988	0.000847081	0.00161402	0.00103321	0.00110079	0.000953234	0.00127427	0.00163522	0.001584	1.29905e-09	0.000987343	0.00111657	0.00123049	0.00101176	0.000861294	0.00107412	0.00107772	0.00123179	0.00105162	0.00113076
532	TAG(12:3/12:3/21:5)	0.875997	765.525	399.551	4.57478e-09	0.000282655	0.000329082	0.00025447	0.000291617	0.00035481	0.00032025	0.000325794	0.000443485	0.000439111	0.000283551	0.000423763	0.0003385	0.00045344	0.000355656	0.000341834	0.000374459	0.000262829	0.000343722	0.000399454	0.000330924	0.000341905	0.000367753	0.000477558	0.000354267	0.000306845	0.00033932	0.000354704	0.000462089	0.000339683	0.000418059	0.000478224	0.000316593	0.0004529	0.000353542	0.000458531	0.000401965	0.000538893	0.000447818	0.000366361	0.00041046	0.000399374	0.000370647	0.000352291	0.000370077
651	TAG(12:3/16:5/19:5)	0.80357	789.558	442.221	0.00031558	8.79233e-05	0.000156001	6.80666e-05	8.62104e-05	0.00010325	0.000111747	0.000118131	0.000110645	9.37646e-05	0.000110294	0.0001567	9.12922e-05	5.28008e-05	0.000103106	7.33925e-05	0.000100982	0.000137011	0.000117313	7.07329e-05	0.000113247	7.6532e-05	9.9634e-05	0.000100684	7.47891e-05	8.36421e-05	8.90565e-05	6.96732e-05	5.96912e-05	9.40551e-05	0.000107876	7.63243e-05	0.000111278	8.58678e-05	9.42412e-05	7.15675e-05	6.85931e-05	5.27352e-05	8.26514e-05	0.000150474	9.7138e-05	8.73252e-05	7.62417e-05	7.57509e-05	7.97673e-05
528	TAG(12:3/19:5/19:5)	0.875997	831.568	418.916	0.000450266	0.000106474	1.46536e-09	8.48961e-05	0.000111951	0.000104974	0.000114548	0.000126444	0.000114125	8.57473e-05	9.42663e-05	0.000161471	0.000136375	8.04639e-05	0.000113826	8.5359e-05	0.000108315	1.50377e-09	0.000110503	7.9593e-05	0.00011348	7.23583e-05	0.000131572	9.73995e-05	0.00010762	0.000117651	0.000117839	9.70267e-05	8.45994e-05	0.000118212	9.93669e-05	0.000105374	0.000137094	0.000106481	0.000121363	0.000102807	7.9452e-05	6.81141e-05	9.16087e-05	0.00014831	0.000110898	0.000105757	9.4e-05	8.35836e-05	8.89998e-05
536	TAG(12:3/20:6/20:6)	0.875997	855.569	391.031	4.57478e-09	0.000156849	0.000103339	9.11441e-05	9.0662e-05	7.14045e-05	0.000133291	0.000164273	0.000189093	0.000101301	0.000160577	0.000123624	0.000151114	0.0001634	0.000108548	7.76295e-05	0.000141438	0.000140297	0.000104539	0.000155627	0.000121408	0.000111597	0.000115939	0.000124477	0.000136299	0.000140471	9.10721e-05	0.000165831	0.000134872	0.000138991	0.00011326	0.000134263	0.000165243	1.21068e-09	0.000210971	0.000102945	0.000131496	0.000123031	9.95415e-05	0.000104017	0.000105804	0.000122506	0.000132405	0.000120872	0.000141003
492	TAG(12:3/21:4/21:4)	0.875997	891.652	580.658	4.57478e-09	3.77151e-05	3.21183e-05	3.77534e-05	4.75514e-05	3.62184e-05	4.0321e-05	4.354e-05	4.09207e-05	4.16658e-05	2.98781e-05	3.64212e-05	4.02457e-05	3.17606e-05	3.47138e-05	4.06659e-05	2.836e-05	2.92089e-05	3.14723e-05	4.21408e-05	3.51338e-05	4.7412e-05	4.31163e-05	4.11789e-05	3.93246e-05	2.82378e-05	3.8045e-05	3.84003e-05	4.76996e-05	3.02691e-05	3.12275e-05	3.6407e-05	4.0244e-05	3.48423e-05	4.35342e-05	3.4488e-05	4.55271e-05	4.23928e-05	4.9844e-05	3.35461e-05	2.65432e-05	3.8614e-05	3.80512e-05	3.85104e-05	3.77172e-05
262	TAG(13:0/13:0/13:0)	0.946224	703.575	495.641	3.53466e-05	2.55496e-05	8.61016e-06	3.92152e-05	2.41282e-05	2.5153e-05	2.45289e-05	2.84787e-05	2.12129e-05	2.11809e-05	2.62843e-05	1.89449e-05	2.14198e-05	1.13128e-09	2.06455e-05	2.76222e-05	2.50972e-05	2.14302e-05	1.37185e-05	3.23115e-05	2.3044e-05	3.63278e-05	2.13686e-05	2.26464e-05	2.00127e-05	3.05924e-05	4.35296e-05	3.31163e-05	2.77784e-05	3.09412e-05	2.63721e-05	2.01718e-05	2.31047e-05	1.21068e-09	3.21701e-05	2.3483e-05	3.3201e-05	2.91283e-05	2.784e-05	2.10909e-05	2.05197e-05	2.61698e-05	2.38787e-05	2.24861e-05	1.43643e-05
458	TAG(13:0/13:0/21:0)	0.875997	815.702	716.928	4.57478e-09	2.60062e-05	2.07812e-05	2.28583e-05	2.7115e-05	2.39871e-05	2.20976e-05	2.14539e-05	2.29691e-05	2.86386e-05	2.48668e-05	2.63899e-05	1.42029e-09	2.60699e-05	2.45054e-05	2.45729e-05	2.57899e-05	2.33334e-05	2.26227e-05	1.17511e-09	2.07033e-05	2.63483e-05	1.40393e-09	2.45151e-05	2.63495e-05	2.47771e-05	2.48405e-05	2.68578e-05	2.92809e-05	2.09682e-05	2.29998e-05	2.15456e-05	2.60487e-05	2.61058e-05	2.91741e-05	2.31115e-05	2.44709e-05	2.73694e-05	2.6892e-05	3.44216e-05	2.20125e-05	2.44045e-05	2.63944e-05	2.20592e-05	2.22778e-05
495	TAG(13:0/13:0/21:1)	0.875997	813.683	562.813	0.00190338	0.00189329	0.00156714	0.00176784	0.00158905	0.00159046	0.00155766	0.00198874	0.00189002	0.00165766	0.00217744	0.00132527	0.00182392	0.00180473	0.00158782	0.00173553	0.00170238	0.00151948	0.00151863	0.00263606	0.00176183	0.00236279	0.0014062	0.00205921	0.00148944	0.00158056	0.00128678	0.00178397	0.00229775	0.00138106	0.00199494	0.0013756	0.00198356	0.00259041	0.0017642	0.00139584	0.00257816	0.00219647	0.00169737	0.00112751	0.00125754	0.00178047	0.00184829	0.00179555	0.0017003
502	TAG(13:0/13:0/21:2)	0.875997	811.656	551.659	4.57478e-09	0.000263276	0.000214984	0.000253438	0.000305581	0.00028413	0.000245492	0.00026121	0.000264845	0.000301784	0.000283716	0.000220599	0.000266478	0.000313389	0.000248152	0.000219348	0.000296574	0.000255732	0.000237137	0.000248688	0.000249228	0.000348869	0.000332963	0.000261364	0.000305752	0.000286063	0.000283768	0.000289493	0.00030065	0.000256304	0.000257319	0.000275194	0.00024111	0.000215024	0.000260951	0.000292256	0.000256085	0.000314315	0.000299348	0.00026819	0.000223515	0.000278427	0.000236848	0.000243531	0.000249415
485	TAG(13:0/13:0/21:3)	0.875997	809.65	611.899	4.57478e-09	1.61598e-05	1.36455e-05	1.61306e-05	1.82426e-05	1.35098e-09	2.36736e-05	1.64406e-05	1.76849e-05	1.88283e-05	1.46868e-05	1.3805e-05	1.54801e-05	1.96077e-05	1.15391e-05	1.36271e-05	1.83978e-05	1.42521e-05	1.48742e-05	1.61312e-05	1.46606e-05	1.30829e-09	1.95742e-05	1.97612e-05	1.99577e-05	1.48816e-05	2.04951e-05	1.97918e-05	1.71789e-05	1.71433e-05	1.74318e-05	1.63186e-05	2.09784e-05	1.5757e-05	1.29905e-09	1.86231e-05	1.97128e-05	2.40729e-05	1.81802e-05	1.48061e-05	1.41318e-05	1.64399e-05	1.6478e-05	1.70463e-05	1.6332e-05
501	TAG(13:0/13:0/21:4)	0.875997	807.637	553.047	3.77593e-06	1.06698e-06	1.49505e-06	3.18056e-06	1.22793e-05	8.75081e-06	3.70662e-05	5.07503e-05	6.08911e-06	3.97363e-05	1.33993e-06	3.57488e-05	9.40362e-06	6.45633e-06	4.76299e-07	7.03628e-07	8.15637e-06	1.14813e-06	2.18602e-06	1.75785e-06	1.15784e-05	4.33288e-05	1.24653e-05	7.88024e-06	7.4962e-06	2.71487e-05	8.59975e-06	3.52927e-05	1.56307e-06	3.5946e-05	8.03319e-06	2.47217e-05	3.33085e-05	1.43092e-06	6.53684e-06	8.48285e-06	3.03358e-05	1.93572e-06	3.46964e-06	5.75822e-06	4.88785e-06	1.54311e-05	3.29296e-06	2.47599e-06	5.09668e-06
459	TAG(13:0/18:0/18:0)	0.875997	843.683	708.798	3.59887e-06	3.81508e-07	1.46536e-09	8.16119e-07	1.164e-06	1.24288e-06	5.75141e-07	1.42582e-06	9.68074e-07	5.10167e-07	1.228e-09	1.49885e-09	1.42029e-09	1.41759e-06	2.26391e-06	1.27075e-09	1.49725e-06	1.50377e-09	6.77612e-07	1.26962e-06	8.90848e-07	9.18036e-07	1.33727e-06	7.04721e-07	1.4797e-06	1.14339e-06	1.59154e-06	1.44182e-06	1.00171e-06	5.01057e-07	1.09324e-06	9.04864e-07	9.68158e-07	6.38271e-07	8.6166e-07	1.42443e-06	1.01049e-06	1.49861e-06	1.27449e-09	1.81728e-09	1.07461e-06	9.79834e-07	1.112e-06	1.72727e-06	1.38331e-06
488	TAG(13:0/18:1/18:1)	0.875997	839.688	597.991	4.57478e-09	0.00027	0.000271183	0.000242345	0.00032001	0.000292726	0.000248936	0.000318756	0.000278933	0.000315524	0.000325053	0.00021459	0.000285725	0.00031751	0.000266207	0.000248772	0.000297407	0.000236023	0.000240256	0.000345524	0.000266774	0.000314142	0.000316911	0.000353833	0.000283891	0.000263735	0.000250309	0.000303388	0.000374676	0.000239374	0.000303692	0.000308477	0.000273215	0.000332923	0.000342059	0.000272855	0.000347098	0.00038502	0.000314115	0.000229161	0.000252461	0.000303067	0.000284856	0.000297028	0.000295414
489	TAG(13:0/18:2/18:2)	0.875997	835.665	595.615	4.18221e-05	3.67967e-05	3.18966e-05	3.19764e-05	3.6702e-05	3.25367e-05	3.47334e-05	4.32913e-05	4.24323e-05	1.76058e-05	1.95563e-05	3.38991e-05	3.84902e-05	3.29588e-05	3.6224e-05	3.0777e-05	2.89341e-05	4.19298e-05	3.43674e-05	4.28744e-05	3.44902e-05	3.82273e-05	3.97295e-05	4.04263e-05	2.79096e-05	4.15828e-05	2.45945e-05	3.65855e-05	2.2718e-05	3.91668e-05	2.02087e-05	3.20119e-05	3.67901e-05	4.9797e-05	4.28027e-05	2.55064e-05	4.27498e-05	3.68918e-05	3.68726e-05	3.04214e-05	2.23887e-05	3.43691e-05	3.52292e-05	3.4209e-05	3.54829e-05
538	TAG(13:0/18:4/18:4)	0.875997	827.595	386.797	6.39428e-05	1.33755e-09	4.5425e-06	5.10937e-05	5.40009e-05	5.0081e-05	1.30371e-05	2.09984e-05	9.93744e-06	3.50904e-06	1.56117e-05	9.73547e-06	1.52927e-05	4.61477e-06	3.10351e-05	2.2362e-05	3.24263e-05	2.08734e-05	1.48784e-06	1.55841e-05	2.20084e-05	3.32981e-05	2.15636e-05	1.28484e-05	2.88919e-05	1.28533e-09	1.70603e-05	4.80898e-06	1.19335e-09	4.28254e-06	8.07163e-06	7.59634e-06	1.79418e-05	8.30583e-06	1.59673e-05	3.3687e-05	8.89908e-06	3.31089e-06	2.17527e-05	2.22904e-05	1.01668e-05	1.40373e-05	1.66055e-05	8.98201e-06	1.31451e-05
454	TAG(13:0/19:1/19:1)	0.875997	867.738	720.783	5.0523e-05	8.70344e-06	1.21458e-05	1.74833e-05	1.06609e-05	1.00905e-05	7.2817e-06	1.29266e-05	1.477e-05	1.74131e-05	1.02562e-05	1.49885e-09	1.42029e-09	1.51574e-05	1.72741e-05	1.27075e-09	1.40379e-05	1.50377e-09	1.19872e-05	9.08923e-06	1.19903e-05	1.44642e-05	1.36294e-05	5.8973e-06	1.14517e-05	1.47178e-05	8.06395e-06	7.73043e-06	8.86775e-06	1.47576e-05	6.00915e-06	9.9793e-06	7.4683e-06	7.64217e-06	5.28027e-06	1.298e-05	9.0242e-06	8.11005e-06	1.99212e-05	1.81728e-09	1.55346e-05	1.00766e-05	1.57797e-05	1.61469e-05	1.6881e-05
473	TAG(13:0/19:2/19:2)	0.875997	863.708	687.297	8.75618e-06	1.35006e-06	2.27418e-06	3.36829e-06	1.42258e-06	1.26113e-06	1.00935e-06	2.06065e-06	3.03759e-06	1.24641e-09	1.23913e-06	1.49885e-09	6.73118e-06	2.61527e-06	2.40144e-06	1.27075e-09	3.61434e-06	1.50377e-09	2.53076e-06	1.42039e-06	2.2549e-06	2.88539e-06	1.25416e-06	5.13198e-07	1.41066e-06	1.94156e-06	1.145e-06	9.05492e-07	1.71765e-06	5.15981e-07	7.22681e-07	9.90584e-07	1.01776e-06	8.93439e-07	5.52806e-07	1.96558e-06	1.22723e-06	9.44429e-07	3.44775e-06	1.81728e-09	2.75841e-06	1.34058e-06	2.63954e-06	2.84313e-06	3.66614e-06
504	TAG(13:0/19:5/19:5)	0.875997	851.636	550.004	7.19731e-05	3.54978e-05	4.73573e-05	3.54557e-05	2.48552e-05	2.66661e-05	2.54387e-05	3.17195e-05	3.23962e-05	3.0858e-05	2.61498e-05	2.79396e-05	2.84934e-05	2.4048e-05	3.42131e-05	2.90148e-05	2.51349e-05	3.69407e-05	2.75859e-05	3.53994e-05	3.28568e-05	1.46989e-05	3.22163e-05	2.90848e-05	3.02563e-05	4.70219e-05	2.97316e-05	9.75505e-06	1.68187e-05	2.77008e-05	3.04464e-05	2.39211e-05	1.05723e-05	3.48096e-05	3.5166e-05	2.21812e-05	3.54018e-05	1.94401e-05	1.12419e-05	4.20636e-05	4.88573e-05	2.75693e-05	2.59169e-05	2.67345e-05	8.79504e-06
463	TAG(13:0/20:0/20:0)	0.875997	899.788	703.895	0.000546941	1.55226e-05	0.000185983	0.000278758	7.738e-05	8.14638e-05	9.13885e-05	6.37554e-05	0.000131584	0.000191545	0.000198832	0.000306574	0.00018729	0.000150376	8.65995e-05	0.000176611	0.000115513	0.000250029	0.00010958	5.50515e-05	0.000165039	0.000164488	7.79393e-05	5.70643e-05	0.000182942	0.000103118	7.24217e-05	0.000103927	0.000112743	1.34107e-09	5.2348e-05	0.000267558	6.84039e-05	0.000131745	2.1951e-05	2.18163e-05	1.9498e-05	3.20926e-05	9.78312e-05	1.81728e-09	0.000125501	8.56696e-05	0.000139389	0.000141023	0.000147444
444	TAG(13:0/21:0/21:0)	0.875997	927.765	747.139	2.25593e-06	4.28385e-07	7.67272e-07	5.7908e-07	3.96247e-07	3.00959e-07	8.8305e-08	3.39347e-07	2.81517e-07	1.0007e-06	6.71563e-07	7.75427e-07	5.95049e-07	4.30843e-07	1.69961e-07	8.13322e-07	3.33335e-07	5.47771e-07	2.65366e-07	2.44013e-07	5.6422e-07	9.1031e-07	3.56685e-07	3.09648e-07	4.72518e-07	2.6702e-07	5.27226e-07	1.56074e-07	1.44612e-07	5.4393e-07	1.32673e-07	6.52758e-07	3.00624e-07	2.58764e-07	2.9143e-07	4.55027e-07	1.46599e-07	1.99637e-07	7.41849e-07	1.12945e-06	6.66767e-07	4.3318e-07	3.03496e-07	4.53983e-07	3.49706e-07
464	TAG(13:0/22:1/22:1)	0.875997	951.816	696.089	0.000115136	4.9286e-05	5.75629e-05	6.57375e-05	2.73472e-05	2.66644e-05	3.42106e-05	2.16433e-05	6.27148e-05	8.79696e-05	7.62891e-05	8.32705e-05	5.72919e-05	3.97636e-05	2.51235e-05	3.7379e-05	2.71009e-05	4.35344e-05	3.32087e-05	2.13135e-05	4.96274e-05	5.91837e-05	3.13229e-05	4.18127e-05	5.45776e-05	3.35079e-05	2.69009e-05	5.61763e-05	4.62585e-05	9.93896e-05	2.03692e-05	5.15451e-05	3.68102e-05	6.63883e-05	3.14637e-05	4.9842e-05	5.55773e-05	6.02853e-05	3.33393e-05	3.90713e-05	3.85456e-05	4.66184e-05	4.63493e-05	5.13608e-05	4.39211e-05
474	TAG(13:0/22:2/22:2)	0.875997	947.789	686.871	0.00017732	0.000122286	8.76386e-05	0.000100669	4.45939e-05	4.11202e-05	8.13237e-05	5.3904e-05	0.000156108	1.24641e-09	1.228e-09	0.000128021	0.000156746	8.50273e-05	4.30485e-05	5.15445e-05	4.93137e-05	9.10191e-05	5.91465e-05	4.8751e-05	7.88792e-05	0.000120892	8.14492e-05	0.000102024	0.000104546	5.73808e-05	5.84314e-05	0.000136175	9.76401e-05	0.000175526	4.09466e-05	0.000114443	5.94297e-05	0.000137378	9.93031e-05	0.000116146	0.000115532	0.000135043	4.92929e-05	0.000119525	6.80978e-05	9.94601e-05	8.44553e-05	8.75801e-05	0.000106921
267	TAG(13:1/13:1/13:1)	0.946224	697.524	340.329	2.29095e-05	7.46165e-05	5.01553e-05	0.000110993	3.87222e-05	6.03806e-05	6.42975e-05	6.98404e-05	9.10719e-05	7.25831e-05	8.78062e-05	2.74688e-05	7.20381e-05	0.000115643	6.16501e-05	0.000132561	4.17872e-05	3.43904e-05	9.2842e-05	9.85218e-05	7.10139e-05	1.30829e-09	5.13501e-05	9.81678e-05	4.6891e-05	7.53924e-05	6.64124e-05	0.000107549	7.8476e-05	8.78819e-05	7.70979e-05	9.51275e-05	5.38065e-05	0.000138388	8.19038e-05	6.55201e-05	1.18155e-09	1.27249e-09	6.56916e-05	2.80184e-05	3.23565e-05	6.25018e-05	8.31042e-05	8.07692e-05	8.34003e-05
457	TAG(13:1/18:0/18:0)	0.875997	841.724	719.119	2.97598e-05	7.12759e-06	7.43268e-06	8.02298e-06	5.21287e-06	6.50915e-06	4.83429e-06	1.36501e-05	8.35365e-06	1.1115e-05	4.01554e-06	1.49885e-09	1.42029e-09	9.03478e-06	1.09696e-05	1.27075e-09	6.45191e-06	1.82317e-05	6.5687e-06	7.66231e-06	8.24785e-06	7.78016e-06	1.40393e-09	4.24261e-06	8.55272e-06	8.46446e-06	5.59308e-06	7.38854e-06	5.10269e-06	7.51684e-06	4.40719e-06	6.62434e-06	5.69455e-06	6.10777e-06	3.96895e-06	6.21914e-06	5.55351e-06	5.03585e-06	1.21999e-05	1.81728e-09	9.27707e-06	5.98663e-06	1.27353e-05	1.39247e-05	1.41663e-05
487	TAG(13:1/18:1/18:1)	0.875997	837.679	598.415	4.57478e-09	0.00202935	0.00193366	0.00175898	0.00277087	0.0020649	0.00179215	0.00237689	0.00232427	0.00235875	0.00230461	0.00164692	0.0021711	0.00236085	0.00188771	0.00188691	0.00229716	0.00182443	0.00173947	0.00259973	0.00200644	0.00254017	0.00242938	0.00251183	0.00221844	0.00192303	0.00196965	0.00226139	0.00267286	0.00179862	0.00219121	0.00235003	0.0021263	0.00250968	0.00258979	0.00204846	0.00210386	0.0029888	0.00260562	0.00171559	0.00179259	0.00226736	0.0020331	0.00201003	0.00225684
503	TAG(13:1/18:2/18:2)	0.875997	833.652	550.034	1.29524e-05	0.000128263	1.51964e-05	1.28133e-09	1.39087e-05	5.69912e-05	0.000117928	8.42563e-05	5.10072e-05	5.05871e-05	6.01565e-05	4.09651e-05	0.000151001	1.13128e-09	4.67532e-05	6.80812e-05	7.50869e-05	1.4172e-05	6.45404e-05	4.55789e-05	5.48714e-05	6.84703e-05	0.000130063	4.64869e-05	0.000124443	3.6688e-05	1.1958e-05	4.70781e-05	5.74461e-05	5.05718e-05	1.1707e-05	4.72144e-05	1.02131e-05	4.68325e-05	0.000125468	4.08227e-05	7.75799e-05	5.31232e-05	7.60479e-05	2.93577e-05	5.13618e-06	5.48354e-05	3.86162e-05	4.8787e-05	5.20387e-05
449	TAG(13:1/19:0/19:0)	0.875997	869.754	736.445	3.13848e-05	6.95033e-06	1.0038e-05	1.42438e-05	8.82594e-06	7.02468e-06	4.89419e-06	7.99491e-06	9.57902e-06	1.34394e-05	6.59106e-06	1.49885e-09	1.42029e-09	9.88181e-06	1.0571e-05	1.27075e-09	7.57722e-06	1.71462e-05	7.02878e-06	5.12684e-06	8.91512e-06	1.08959e-05	1.07709e-05	5.33094e-06	9.46685e-06	9.93621e-06	5.21032e-06	5.9357e-06	5.30946e-06	1.36514e-05	4.38317e-06	8.00133e-06	4.81741e-06	6.22888e-06	4.00456e-06	8.45639e-06	6.04082e-06	4.61519e-06	1.2502e-05	1.81728e-09	8.99831e-06	7.22787e-06	1.17464e-05	1.18359e-05	1.23539e-05
498	TAG(13:1/19:2/19:2)	0.875997	861.679	559.982	4.57478e-09	6.08448e-05	4.69565e-05	6.72355e-05	4.87265e-05	5.8174e-05	5.51981e-05	4.78896e-05	4.00017e-05	5.98406e-05	5.89234e-05	3.37747e-05	4.30631e-05	5.83746e-05	6.60333e-05	4.76359e-05	6.59795e-05	4.15684e-05	5.48429e-05	5.77529e-05	5.0641e-05	8.11555e-05	5.49672e-05	3.1494e-05	5.40586e-05	4.85796e-05	5.81863e-05	5.6789e-05	6.16655e-05	4.0429e-05	5.25243e-05	4.65516e-05	5.06148e-05	4.84022e-05	6.23786e-05	4.49273e-05	1.18155e-09	8.08223e-05	5.40118e-05	3.32581e-05	4.70302e-05	5.03924e-05	5.14806e-05	5.06037e-05	5.16389e-05
451	TAG(13:1/20:0/20:0)	0.875997	897.731	729.567	4.87247e-05	9.34973e-06	1.33868e-05	1.66684e-05	9.2162e-06	9.01889e-06	7.9872e-06	1.32474e-05	1.29791e-05	1.97657e-05	1.32247e-05	1.49885e-09	2.75365e-05	1.81036e-05	1.64234e-05	2.31601e-05	1.71572e-05	2.96366e-05	1.29108e-05	1.41834e-05	1.66341e-05	1.02322e-05	8.27327e-06	5.61647e-06	1.22785e-05	1.3284e-05	7.77446e-06	7.69379e-06	9.26152e-06	1.43806e-05	8.77198e-06	8.81253e-06	6.31544e-06	9.43987e-06	7.94639e-06	1.24001e-05	9.72177e-06	8.73804e-06	1.99133e-05	1.81728e-09	2.10944e-05	1.00975e-05	1.80394e-05	1.36199e-05	1.40526e-05
[truncated: 164 more rows]
[truncated: 3 more columns]
